# Supplementary material for: Transitioning to healthy and sustainable diets has high environmental and affordability trade-offs for developing countries
Source: Research Square preprint supplement (doi:10.21203/rs.3.rs-3278140/v1), 2023-08-29
Supplement: Supplementary file 1 [file 11a72e801b151056d02475b9.xlsx]

## Sheet: Country-level
Year	Region	Income-group	BaU	EAT	HUS	MED	VEG
y2025	SEN	Developing country	4.27779	4.0927	4.2012	4.1335	4.21102
y2025	GMB	Developing country	0.0921121	0.0920922	0.0921242	0.0921243	0.0920741
y2025	MRT	Developing country	1.09265	1.11053	1.09395	1.09714	1.15856
y2025	ESH	Developing country	3.1e-14	3.1e-14	3.1e-14	3.1e-14	3.1e-14
y2025	GNB	Developing country	0.543074	0.542956	0.543145	0.543146	0.54285
y2025	GIN	Developing country	5.46484	5.46405	5.47649	5.46612	5.47318
y2025	SLE	Developing country	1.36224	1.36226	1.37121	1.36287	1.3702
y2025	MLI	Developing country	6.53029	6.38792	6.47657	6.42091	6.49173
y2025	LBR	Developing country	1.3677	1.38405	1.3935	1.36891	1.37554
y2025	CIV	Developing country	12.7363	12.7486	12.8285	12.7424	12.8065
y2025	BFA	Developing country	4.85322	4.78078	4.85382	4.80964	4.85143
y2025	GHA	Developing country	8.75179	8.7514	8.80294	8.75523	8.79661
y2025	TGO	Developing country	2.66362	2.66367	2.67595	2.66479	2.6741
y2025	NER	Developing country	19.9178	18.0752	17.2056	17.3536	20.6646
y2025	BEN	Developing country	2.52108	2.51776	2.52805	2.4692	2.52511
y2025	DZA	Developing country	3.33136	3.33086	3.33169	3.33164	3.3299
y2025	NGA	Developing country	41.6613	36.9281	41.5814	41.2551	37.4179
y2025	CMR	Developing country	11.8305	11.8287	11.8799	11.8103	11.8491
y2025	GAB	Developing country	2.03105	2.03766	2.03882	2.03185	2.03034
y2025	GNQ	Developing country	0.55857	0.588089	0.589432	0.559749	0.558384
y2025	NAM	Developing country	0.812143	0.794828	0.80685	0.806711	0.796938
y2025	AGO	Developing country	3.47553	3.47974	3.50465	3.52951	3.50779
y2025	COG	Developing country	2.45973	2.46741	2.46975	2.46138	2.45993
y2025	COD	Developing country	23.1668	23.9917	24.1096	23.5854	23.2112
y2025	LBY	Developing country	10.3439	10.3439	10.3435	10.3441	10.3353
y2025	TCD	Developing country	4.39792	4.33162	4.39642	4.35682	4.39854
y2025	CAF	Developing country	4.63677	4.63223	4.63533	4.64676	4.63652
y2025	ZAF	Developing country	25.1066	20.8369	24.4971	24.4621	22.1102
y2025	BWA	Developing country	0.511487	0.509048	0.508396	0.508371	0.52123
y2025	ZMB	Developing country	1.24443	1.25658	1.26849	1.29358	1.25083
y2025	SDN	Developing country	28.586	26.5121	27.5445	27.5967	27.108
y2025	ZWE	Developing country	3.64156	3.36115	3.76865	3.76845	3.55022
y2025	LSO	Developing country	0.135299	0.13317	0.133443	0.133443	0.133044
y2025	BDI	Developing country	0.7128	0.667105	0.691651	0.706597	0.719797
y2025	RWA	Developing country	0.234735	0.19731	0.217296	0.229561	0.240599
y2025	TZA	Developing country	2.69758	2.52234	2.61518	2.71345	2.68149
y2025	UGA	Developing country	1.96512	1.67073	1.82638	1.92175	2.00796
y2025	MOZ	Developing country	2.00679	1.88008	2.05487	2.07743	1.94364
y2025	SWZ	Developing country	0.0935703	0.0878732	0.0975172	0.0965458	0.0932139
y2025	MWI	Developing country	0.346893	0.307904	0.33858	0.287711	0.32346
y2025	ETH	Developing country	6.57467	6.76324	6.75588	6.55317	6.83108
y2025	EGY	Developing country	47.8737	47.8743	47.8749	47.8749	47.8102
y2025	KEN	Developing country	3.51262	3.42069	3.46653	3.3677	3.5121
y2025	ERI	Developing country	0.447406	0.44106	0.441943	0.441301	0.444652
y2025	SOM	Developing country	3.88412	3.73487	3.73592	3.73592	3.84861
y2025	DJI	Developing country	0.00318155	0.00327184	0.00319373	0.00321416	0.00344652
y2025	MDG	Developing country	8.36345	8.87126	9.14508	8.50416	8.35144
y2025	MUS	Developing country	0	0	0	0	0
y2025	ATF	Developing country	0	0	0	0	0
y2025	CHN	Developing country	711.935	686.168	720.769	725.206	707.398
y2025	IND	Developing country	1289.64	1269.89	1282.25	1280.88	1227.42
y2025	NPL	Developing country	18.3924	25.3875	24.7255	26.8629	22.0131
y2025	MNG	Developing country	1.29818	1.26961	1.30259	1.30945	1.26378
y2025	MMR	Developing country	83.5326	90.9319	99.4383	98.1616	85.8473
y2025	LAO	Developing country	43.3004	65.2817	63.5909	68.039	55.0937
y2025	THA	Developing country	121.026	108.923	110.095	109.73	109.11
y2025	KHM	Developing country	27.8391	28.859	31.0684	30.5281	27.6562
y2025	VNM	Developing country	75.3761	109.722	106.069	114.751	93.4639
y2025	RUS	Developing country	154.138	153.479	153.753	153.87	154.346
y2025	PRK	Developing country	12.6318	11.3311	12.3569	14.4403	11.6237
y2025	GRL	Developed income	1.08132	1.0813	1.08131	1.0813	1.08129
y2025	ISL	Developing country	0.928358	0.927271	0.927756	0.927278	0.926262
y2025	ESP	Developed income	34.4095	34.3321	34.9847	34.9845	34.3222
y2025	IRL	Developing country	0.834828	0.837072	0.834601	0.834561	0.834267
y2025	PRT	Developing country	4.80449	4.80448	4.80449	4.80449	4.80228
y2025	GBR	Developed income	5.47935	5.47656	5.47845	5.47604	4.6958
y2025	FRA	Developed income	26.5732	24.0175	35.5476	25.5451	23.8334
y2025	BEL	Developed income	0.754775	0.753659	0.754665	0.754225	0.752209
y2025	NLD	Developing country	0.737198	0.736211	0.737106	0.736725	0.735155
y2025	NOR	Developing country	3.45146	3.44733	3.44929	3.44753	3.443
y2025	LUX	Developing country	0.0363954	0.0363271	0.036389	0.0363627	0.0362189
y2025	DEU	Developed income	9.72831	9.59228	10.6202	10.6139	9.5885
y2025	CHE	Developed income	0.356486	0.355914	0.356361	0.3562	0.355272
y2025	ITA	Developing country	28.0254	27.7827	29.8319	29.8319	27.6982
y2025	DNK	Developed income	1.64075	1.63767	1.64046	1.63927	1.63969
y2025	AUT	Developed income	2.13195	2.01415	3.00478	3.00448	1.30864
y2025	SWE	Developing country	2.59256	2.59679	2.59203	2.59175	3.86774
y2025	CZE	Developed income	2.62366	2.59574	2.79805	2.7963	2.59564
y2025	HRV	Developing country	1.88547	1.63895	3.71947	3.71944	1.63732
y2025	SVN	Developing country	0.316987	0.273309	0.641945	0.641939	0.273006
y2025	SJM	Developing country	0.073891	0.073891	0.073891	0.073891	0.073891
y2025	POL	Developing country	11.2434	11.2231	11.2414	11.2334	11.2302
y2025	BIH	Developing country	0.915469	0.913745	0.915323	0.914947	0.911847
y2025	HUN	Developing country	7.16783	6.14938	14.747	14.747	6.14673
y2025	SVK	Developing country	1.8553	1.75001	2.6306	2.63008	1.44428
y2025	MNE	Developing country	0.17782	0.177484	0.177793	0.17772	0.177091
y2025	SRB	Developing country	3.53874	3.53205	3.53819	3.53674	3.5289
y2025	ALB	Developing country	0.51607	0.515311	0.516008	0.51584	0.514714
y2025	GRC	Developed income	8.42988	8.42987	8.42988	8.42988	8.43038
y2025	MKD	Developing country	0.606074	0.605083	0.605994	0.60578	0.604195
y2025	ROU	Developed income	15.8504	14.2045	16.0977	17.0975	14.1734
y2025	LTU	Developing country	2.34082	2.33643	2.34041	2.33872	2.33744
y2025	LVA	Developing country	0.723445	0.722175	0.723316	0.722806	0.71937
y2025	FIN	Developed income	1.92064	1.92599	1.92014	1.92013	2.71835
y2025	EST	Developed income	0.709098	0.709467	0.708937	0.708676	0.707056
y2025	BGR	Developing country	7.05644	6.55226	10.8091	10.809	6.55104
y2025	BLR	Developing country	2.70082	2.65411	2.67158	2.68115	2.72265
y2025	TUR	Developing country	18.7653	18.7606	18.7649	18.7638	18.7567
y2025	MDA	Developing country	0.959821	0.939755	0.946511	0.950892	0.970173
y2025	CYP	Developed income	0.159699	0.159699	0.159699	0.159699	0.159418
y2025	IRN	Developing country	32.8799	32.8799	32.8799	32.8799	32.88
y2025	UKR	Developing country	15.0468	14.7345	14.8402	14.9082	15.2073
y2025	GEO	Developing country	0.520084	0.513171	0.515834	0.517207	0.523142
y2025	ARM	Developing country	0.497949	0.49725	0.497714	0.497746	0.497318
y2025	AZE	Developing country	3.65456	3.65004	3.65274	3.65318	3.65238
y2025	KAZ	Developing country	22.3972	22.3417	22.38	22.3829	22.3466
y2025	TKM	Developing country	8.65807	8.65823	8.65825	8.65826	8.65823
y2025	UZB	Developing country	19.7555	19.7567	19.757	19.757	19.7567
y2025	AFG	Developing country	9.39063	9.23526	9.23705	9.30308	9.29044
y2025	TJK	Developing country	3.70706	3.70377	3.70427	3.70431	3.70377
y2025	KGZ	Developing country	3.67849	3.6763	3.67756	3.67766	3.67636
y2025	MEX	Developing country	121.283	98.3409	114.2	117.786	93.902
y2025	USA	Developed income	306.654	292.585	309.148	306.661	291.411
y2025	GTM	Developing country	6.26349	4.60558	5.91	5.97656	4.39978
y2025	ECU	Developing country	10.1355	10.1312	10.1564	10.1664	9.54742
y2025	SLV	Developing country	1.97584	1.91118	1.82141	1.64352	1.95239
y2025	HND	Developing country	5.1905	4.57429	5.05646	5.13298	4.38868
y2025	BLZ	Developing country	0.631102	0.160009	0.697552	0.704725	0.152201
y2025	NIC	Developing country	5.38583	5.16976	5.29301	5.27213	5.17451
y2025	CRI	Developing country	2.4952	2.15814	2.4483	2.47947	1.9724
y2025	CUB	Developing country	9.728	8.8047	7.76415	8.33107	8.29163
y2025	PAN	Developing country	3.98686	3.90651	3.96676	3.97484	3.50807
y2025	PER	Developing country	21.82	21.7937	21.8546	21.8393	19.9367
y2025	COL	Developing country	36.9555	35.7968	36.9307	36.9807	30.5506
y2025	BHS	Developed income	0.0445677	0.00348937	0.0528874	0.0527846	0.00331911
y2025	JAM	Developing country	0.347469	0.281458	0.315349	0.328281	0.269739
y2025	CHL	Developed income	30.0082	29.8243	29.8637	29.8196	29.7302
y2025	HTI	Developing country	2.30321	2.25275	1.88365	1.90706	2.19804
y2025	BRA	Developing country	160.366	160.137	160.02	160.03	155.372
y2025	ARG	Developing country	35.5583	34.7684	35.0362	35.3757	34.3943
y2025	VEN	Developing country	41.1657	40.8214	41.0794	41.0942	49.8989
y2025	DOM	Developing country	4.04192	3.30843	3.43885	3.61179	3.10397
y2025	BOL	Developing country	8.14191	7.91221	8.09883	8.16539	7.56087
y2025	PRY	Developing country	3.85981	3.81746	3.85777	3.86007	3.5126
y2025	TTO	Developing country	1.48917	1.48911	1.48913	1.48914	0.368367
y2025	FLK	Developing country	8e-15	8e-15	8e-15	8e-15	7e-15
y2025	GUY	Developing country	11.0128	10.9428	10.943	10.943	7.36836
y2025	URY	Developed income	8.25961	8.2519	8.25557	8.25555	8.24962
y2025	SUR	Developing country	1.68118	1.68106	1.68115	1.68115	3.02415
y2025	GUF	Developing country	0.18286	0.182825	0.18285	0.182851	0.186454
y2025	SGS	Developing country	1e-15	1e-15	1e-15	1e-15	1e-15
y2025	MAR	Developing country	37.8428	37.8419	37.8406	37.8419	37.8418
y2025	TUN	Developing country	4.13693	4.13688	4.13863	4.13698	4.09225
y2025	SAU	Developing country	8.0284	8.03228	8.02856	8.0284	8.03666
y2025	ISR	Developing country	0.562569	0.562569	0.562569	0.562569	0.562569
y2025	JOR	Developing country	0.283637	0.283637	0.283637	0.283637	0.283637
y2025	LBN	Developing country	1.09441	1.09441	1.09441	1.09441	1.09441
y2025	SYR	Developing country	2.83774	2.83774	2.83774	2.83774	2.83774
y2025	IRQ	Developing country	4.72021	4.71999	4.71999	4.71999	4.71999
y2025	YEM	Developing country	3.29763	3.29847	3.29765	3.29763	3.29942
y2025	KWT	Developing country	0.137786	0.137786	0.137786	0.137786	0.137786
y2025	QAT	Developing country	0.0116244	0.0116244	0.0116244	0.0116244	0.0116244
y2025	OMN	Developing country	0.190732	0.190732	0.190732	0.190732	0.190732
y2025	ARE	Developed income	0.273208	0.273208	0.273208	0.273208	0.273208
y2025	PAK	Developing country	106.091	103.608	103.284	104.188	103.886
y2025	CAN	Developed income	61.3064	61.0393	61.155	61.1222	61.0195
y2025	PRI	Developing country	0.280494	0.208688	0.252985	0.264925	0.19916
y2025	AUS	Developed income	23.3953	23.4375	24.5448	22.5854	22.2148
y2025	JPN	Developing country	33.1658	33.8298	32.6373	33.0186	34.9755
y2025	NZL	Developing country	11.1194	11.11	11.114	11.1129	11.1093
y2025	IDN	Developing country	94.4367	95.4306	95.3671	95.5667	94.9208
y2025	MYS	Developing country	16.6809	16.6765	16.6871	16.6827	16.6719
y2025	SGP	Developing country	0.0478285	0.0478134	0.0478493	0.0478343	0.0477978
y2025	BRN	Developed income	0.0823395	0.0823136	0.0823754	0.0823495	0.0822866
y2025	PHL	Developing country	28.6687	27.9414	27.9514	28.0795	27.6288
y2025	TLS	Developing country	0.852029	0.852029	0.852029	0.852029	0.852029
y2025	KOR	Developing country	12.8865	12.0323	13.275	15.4843	12.1158
y2025	PNG	Developing country	4.63368	5.67855	5.56597	5.81065	5.18793
y2025	SLB	Developing country	0.0597093	0.0596905	0.0597353	0.0597166	0.059671
y2025	NCL	Developing country	0.0811023	0.128737	0.154293	0.148826	0.111045
y2025	VUT	Developing country	0.0379983	0.0379864	0.0380149	0.038003	0.0379739
y2025	FJI	Developing country	0.276443	0.275535	0.276837	0.276765	0.2743
y2025	REU	Developing country	0.0059304	0.00592602	0.00594	0.00594	0.00591976
y2025	LKA	Developing country	13.5418	19.3005	18.5736	19.8163	16.6164
y2025	BGD	Developing country	49.3562	68.751	65.8813	70.4866	59.1779
y2025	BTN	Developing country	0.419028	0.420552	0.449656	0.488953	0.412984
y2030	SEN	Developing country	4.31961	3.79354	4.00219	3.74819	3.99388
y2030	GMB	Developing country	0.0920733	0.0742949	0.0835145	0.0798131	0.0919935
y2030	MRT	Developing country	1.11626	1.10466	1.16599	1.10206	1.17506
y2030	ESH	Developing country	3.3e-14	3.4e-14	3.1e-14	3.1e-14	3.3e-14
y2030	GNB	Developing country	0.54324	0.438358	0.530432	0.470904	0.542769
y2030	GIN	Developing country	5.53435	4.77402	5.63136	5.01452	5.53985
y2030	SLE	Developing country	1.41775	1.39239	1.43397	1.40397	1.42483
y2030	MLI	Developing country	6.55052	5.52733	6.5257	5.67758	6.29716
y2030	LBR	Developing country	1.42065	1.44429	1.43698	1.43666	1.44344
y2030	CIV	Developing country	13.1895	12.873	13.4507	13.0009	13.2631
y2030	BFA	Developing country	4.87665	4.07025	4.5793	4.22797	4.72343
y2030	GHA	Developing country	9.04478	8.71673	9.01778	8.83971	9.08419
y2030	TGO	Developing country	2.76031	2.752	2.759	2.76027	2.76924
y2030	NER	Developing country	20.9325	16.2384	17.0165	15.9436	17.9584
y2030	BEN	Developing country	2.49575	2.34491	2.20304	2.15997	2.59769
y2030	DZA	Developing country	3.15454	3.17219	3.14346	3.14462	3.17079
y2030	NGA	Developing country	42.6167	39.579	40.2665	40.044	37.4468
y2030	CMR	Developing country	12.0746	12.0886	12.0537	11.8147	12.0736
y2030	GAB	Developing country	2.03882	2.04426	2.04331	2.04247	2.04306
y2030	GNQ	Developing country	0.559719	0.588057	0.572939	0.572276	0.58793
y2030	NAM	Developing country	0.829115	0.892927	0.940602	0.94739	0.83485
y2030	AGO	Developing country	3.45885	3.45514	3.43674	3.42033	3.37356
y2030	COG	Developing country	2.47459	2.48201	2.48079	2.48303	2.48063
y2030	COD	Developing country	23.4197	24.497	23.8635	24.0684	24.4065
y2030	LBY	Developing country	10.4581	10.6504	10.3656	10.3635	10.4773
y2030	TCD	Developing country	4.51586	4.43482	4.38339	4.54814	4.39217
y2030	CAF	Developing country	4.65135	4.65017	4.6515	4.78261	4.64603
y2030	ZAF	Developing country	25.6272	21.774	24.8821	24.2561	20.4116
y2030	BWA	Developing country	0.506808	0.525076	0.530086	0.526321	0.515172
y2030	ZMB	Developing country	1.29615	1.31681	1.30975	1.33726	1.27061
y2030	SDN	Developing country	29.145	25.3581	27.3373	26.9328	27.207
y2030	ZWE	Developing country	3.76509	3.55959	4.28802	4.27609	3.18113
y2030	LSO	Developing country	0.146821	0.146916	0.201672	0.150408	0.146172
y2030	BDI	Developing country	0.746689	0.729334	0.684671	0.684323	0.69644
y2030	RWA	Developing country	0.261719	0.247748	0.210659	0.210489	0.220977
y2030	TZA	Developing country	2.76513	2.58463	2.57635	2.67061	2.51174
y2030	UGA	Developing country	2.18497	2.07443	1.78491	1.78599	1.86737
y2030	MOZ	Developing country	2.09762	2.10319	2.27742	2.30464	1.8329
y2030	SWZ	Developing country	0.0981686	0.0884329	0.097491	0.096427	0.0828396
y2030	MWI	Developing country	0.360441	0.280724	0.343638	0.290201	0.318349
y2030	ETH	Developing country	7.71192	7.04997	7.51094	6.93401	7.47292
y2030	EGY	Developing country	48.7022	49.9558	47.9355	47.9938	48.8459
y2030	KEN	Developing country	3.75251	3.52624	3.66114	3.49505	3.52984
y2030	ERI	Developing country	0.46231	0.45959	0.46086	0.459392	0.461477
y2030	SOM	Developing country	3.92304	3.71772	3.25352	3.6746	3.77222
y2030	DJI	Developing country	0.00310994	0.00308149	0.00332299	0.00308226	0.00335979
y2030	MDG	Developing country	8.81424	9.08262	8.33157	8.89303	9.1611
y2030	MUS	Developing country	0	0	0	0	0
y2030	ATF	Developing country	0	0	0	0	0
y2030	CHN	Developing country	785.978	740.573	746.28	753.37	706.584
y2030	IND	Developing country	1263.81	1287.89	1291.95	1291.16	1199.19
y2030	NPL	Developing country	18.8345	27.6592	26.2036	25.8637	30.1788
y2030	MNG	Developing country	1.32422	1.26658	1.70623	1.34493	1.25079
y2030	MMR	Developing country	89.5905	94.6213	94.4713	99.8802	85.6371
y2030	LAO	Developing country	45.6154	73.6409	69.1293	69.19	81.9573
y2030	THA	Developing country	119.901	91.943	104.691	95.1731	96.2557
y2030	KHM	Developing country	29.2643	28.8205	29.4839	30.4515	26.6964
y2030	VNM	Developing country	78.0738	121.108	114.497	112.846	132.815
y2030	RUS	Developing country	156.187	155.838	155.551	155.549	155.839
y2030	PRK	Developing country	12.5097	10.4802	11.1005	10.0658	11.3716
y2030	GRL	Developed income	1.07946	1.07944	1.07946	1.07944	1.07944
y2030	ISL	Developing country	0.901785	0.900259	0.901607	0.900524	0.900139
y2030	ESP	Developed income	32.7021	32.6131	33.2639	33.2639	32.6033
y2030	IRL	Developing country	0.818891	0.818573	0.818777	0.8188	0.818168
y2030	PRT	Developing country	4.51706	4.51493	4.51706	4.51706	4.51283
y2030	GBR	Developed income	5.33344	4.55602	5.32837	5.32971	4.54459
y2030	FRA	Developed income	26.0013	23.2389	34.4901	24.4914	23.2142
y2030	BEL	Developed income	0.730108	0.728197	0.729183	0.729429	0.724895
y2030	NLD	Developing country	0.711961	0.710481	0.711165	0.711377	0.707802
y2030	NOR	Developing country	3.35838	3.3524	3.35776	3.35382	3.35028
y2030	LUX	Developing country	0.0352449	0.0351081	0.0351896	0.0352043	0.0348884
y2030	DEU	Developed income	9.40197	9.26936	10.2578	10.2613	9.23856
y2030	CHE	Developed income	0.354753	0.353673	0.35475	0.354466	0.351677
y2030	ITA	Developing country	26.982	26.659	28.7391	28.7391	26.6715
y2030	DNK	Developed income	1.58352	1.58404	1.58103	1.58169	1.58078
y2030	AUT	Developed income	2.09257	1.27842	2.94336	2.94353	1.27582
y2030	SWE	Developing country	2.54531	3.80329	2.54465	2.54481	3.80001
y2030	CZE	Developed income	2.53864	2.51285	2.70532	2.70629	2.50521
y2030	HRV	Developing country	1.8554	1.60204	3.64567	3.64569	1.60051
y2030	SVN	Developing country	0.312703	0.267144	0.63044	0.630444	0.26686
y2030	SJM	Developing country	0.0730089	0.0730089	0.0730089	0.0730089	0.0730089
y2030	POL	Developing country	10.863	10.8607	10.8462	10.8507	10.8329
y2030	BIH	Developing country	0.92626	0.922671	0.926359	0.925842	0.914521
y2030	HUN	Developing country	7.04813	6.0177	14.4352	14.4352	6.01585
y2030	SVK	Developing country	1.81466	1.40677	2.56924	2.56953	1.4031
y2030	MNE	Developing country	0.180093	0.17939	0.180113	0.180014	0.17776
y2030	SRB	Developing country	3.5773	3.56336	3.57769	3.57572	3.53619
y2030	ALB	Developing country	0.518814	0.51723	0.518859	0.518633	0.513825
y2030	GRC	Developed income	8.08493	8.08543	8.08493	8.08493	8.08595
y2030	MKD	Developing country	0.611113	0.609044	0.611172	0.610881	0.604553
y2030	ROU	Developed income	15.5402	13.8461	15.4837	16.4838	13.8427
y2030	LTU	Developing country	2.26372	2.26265	2.26017	2.26112	2.25619
y2030	LVA	Developing country	0.702927	0.699638	0.701851	0.702138	0.694744
y2030	FIN	Developed income	1.87758	2.66764	1.87749	1.8775	2.67014
y2030	EST	Developed income	0.692121	0.69056	0.691558	0.691704	0.688194
y2030	BGR	Developing country	6.89662	6.38504	10.5566	10.5566	6.38414
y2030	BLR	Developing country	2.75324	2.7243	2.70551	2.70597	2.74091
y2030	TUR	Developing country	18.5382	18.5285	18.5385	18.5371	18.508
y2030	MDA	Developing country	0.976039	0.96498	0.954737	0.954633	0.972692
y2030	CYP	Developed income	0.14894	0.148676	0.14894	0.14894	0.148413
y2030	IRN	Developing country	33.2839	33.2783	33.2834	33.2809	33.2817
y2030	UKR	Developing country	15.3002	15.1274	14.9689	14.9679	15.247
y2030	GEO	Developing country	0.529204	0.524783	0.52218	0.522354	0.527151
y2030	ARM	Developing country	0.498616	0.504213	0.497507	0.497391	0.494981
y2030	AZE	Developing country	3.63197	3.71715	3.62118	3.61973	3.59205
y2030	KAZ	Developing country	22.437	22.555	22.3722	22.3683	22.3027
y2030	TKM	Developing country	8.74552	8.87224	8.73609	8.73406	8.68833
y2030	UZB	Developing country	19.6636	20.2249	19.6255	19.6173	19.4687
y2030	AFG	Developing country	9.43026	9.29042	9.30701	9.27907	9.37089
y2030	TJK	Developing country	3.69659	3.78491	3.68638	3.68449	3.64742
y2030	KGZ	Developing country	3.65837	3.73482	3.65039	3.64909	3.62261
y2030	MEX	Developing country	139.945	95.2427	125.57	113.62	96.3974
y2030	USA	Developed income	301.081	282.973	294.456	294.116	263.331
y2030	GTM	Developing country	7.01197	4.56069	6.10542	6.03417	4.57971
y2030	ECU	Developing country	10.2662	10.1437	10.237	10.2628	9.51481
y2030	SLV	Developing country	2.52371	2.00564	1.35098	1.48403	1.98746
y2030	HND	Developing country	6.09019	4.644	5.02107	5.19043	4.53681
y2030	BLZ	Developing country	0.76188	0.152833	0.827704	0.789805	0.161584
y2030	NIC	Developing country	6.04704	5.32692	5.22544	5.24449	5.14714
y2030	CRI	Developing country	2.57805	2.18964	2.5603	2.32699	1.75632
y2030	CUB	Developing country	9.53214	8.33829	8.45749	7.66159	8.69273
y2030	PAN	Developing country	4.04015	4.04174	4.00734	3.50388	2.89724
y2030	PER	Developing country	22.3006	21.4534	21.5971	21.6649	18.825
y2030	COL	Developing country	37.4882	36.4741	37.3628	34.9152	27.7624
y2030	BHS	Developed income	0.0567189	0.00341134	0.0637599	0.0609534	0.00360666
y2030	JAM	Developing country	0.355148	0.273174	0.342928	0.329481	0.275788
y2030	CHL	Developed income	31.5579	29.2509	29.2075	29.2057	28.5094
y2030	HTI	Developing country	2.41704	2.21012	1.75404	1.73578	2.28213
y2030	BRA	Developing country	161.217	162.871	163.015	162.094	156.417
y2030	ARG	Developing country	37.639	34.9476	35.5439	35.369	34.1311
y2030	VEN	Developing country	41.6991	41.2165	41.5965	41.399	50.1599
y2030	DOM	Developing country	4.25592	3.15345	3.75614	3.35516	3.22551
y2030	BOL	Developing country	8.50825	7.83157	8.14227	8.16844	6.90307
y2030	PRY	Developing country	3.95268	3.85863	3.91375	3.93	3.41302
y2030	TTO	Developing country	1.49887	1.49872	1.49877	1.49877	0.370672
y2030	FLK	Developing country	9e-15	9e-15	9e-15	9e-15	8e-15
y2030	GUY	Developing country	11.088	11.0054	11.017	11.017	7.43256
y2030	URY	Developed income	8.37741	8.28532	8.36999	8.36997	8.35407
y2030	SUR	Developing country	1.69484	1.69404	1.69471	1.6947	3.04346
y2030	GUF	Developing country	0.186367	0.185797	0.186335	0.186333	2.23325
y2030	SGS	Developing country	1e-15	1e-15	1e-15	1e-15	0
y2030	MAR	Developing country	37.9675	38.0686	38.0266	37.9661	37.9666
y2030	TUN	Developing country	4.58042	5.4165	4.03495	4.0907	4.67939
y2030	SAU	Developing country	7.83064	7.6183	7.8041	7.70297	7.73707
y2030	ISR	Developing country	0.625763	0.625763	0.625763	0.625763	0.625763
y2030	JOR	Developing country	0.317209	0.317209	0.317209	0.317209	0.317209
y2030	LBN	Developing country	1.12749	1.12744	1.12749	1.12749	1.12749
y2030	SYR	Developing country	2.94753	2.9476	2.94753	2.94753	2.94753
y2030	IRQ	Developing country	4.76862	4.76797	4.76841	4.76841	4.76841
y2030	YEM	Developing country	3.31395	3.25747	3.30743	3.28062	3.2891
y2030	KWT	Developing country	0.148807	0.148807	0.148807	0.148807	0.148807
y2030	QAT	Developing country	0.0100312	0.0100312	0.0100312	0.0100312	0.0100312
y2030	OMN	Developing country	0.185062	0.169729	0.183745	0.176468	0.178316
y2030	ARE	Developed income	0.211087	0.211087	0.211087	0.211087	0.211087
y2030	PAK	Developing country	105.516	101.053	102.994	100.877	103.006
y2030	CAN	Developed income	61.5909	61.2711	61.3579	61.31	61.1917
y2030	PRI	Developing country	0.2897	0.19989	0.280321	0.267138	0.207103
y2030	AUS	Developed income	22.7718	21.628	23.2004	22.9726	18.8654
y2030	JPN	Developing country	32.6582	33.1483	31.4508	31.7787	34.6854
y2030	NZL	Developing country	11.2035	11.1922	11.1952	11.1936	11.1559
y2030	IDN	Developing country	95.0087	96.2036	95.7758	96.0092	96.6033
y2030	MYS	Developing country	16.9414	16.9312	16.4032	16.935	16.9674
y2030	SGP	Developing country	0.0488852	0.0488507	0.0464906	0.0488633	0.0489731
y2030	BRN	Developed income	0.0844537	0.0843941	0.109901	0.0844159	0.0846056
y2030	PHL	Developing country	28.8123	26.402	26.9875	26.5858	27.1557
y2030	TLS	Developing country	0.831024	0.831024	0.825279	0.825279	0.831024
y2030	KOR	Developing country	12.98	11.1661	11.161	10.7429	11.8496
y2030	PNG	Developing country	4.75653	6.06777	7.09362	5.81959	6.57013
y2030	SLB	Developing country	0.0621485	0.0621047	0.158046	0.0621208	0.0622604
y2030	NCL	Developing country	0.104451	0.174556	0.227039	0.186907	0.13547
y2030	VUT	Developing country	0.0389287	0.0389013	0.0429033	0.0389113	0.0389988
y2030	FJI	Developing country	0.284342	0.282287	0.298981	0.284901	0.281224
y2030	REU	Developing country	0.00645025	0.0065144	0.00567984	0.00642257	0.00641733
y2030	LKA	Developing country	13.9866	21.3213	20.1414	19.9814	23.1134
y2030	BGD	Developing country	50.3856	73.8112	71.0853	69.0767	77.6665
y2030	BTN	Developing country	0.431009	0.407838	0.42293	0.404594	0.40946
y2035	SEN	Developing country	4.35384	3.82213	4.04388	3.87077	4.02982
y2035	GMB	Developing country	0.0922568	0.0749301	0.0836808	0.0750226	0.0921565
y2035	MRT	Developing country	1.13796	1.13024	1.18536	1.12416	1.14986
y2035	ESH	Developing country	3.4e-14	3.3e-14	3.1e-14	3.1e-14	3.4e-14
y2035	GNB	Developing country	0.544732	0.442438	0.531863	0.442972	0.54414
y2035	GIN	Developing country	5.66747	4.9154	5.75443	4.92094	5.65211
y2035	SLE	Developing country	1.51859	1.48585	1.52673	1.48738	1.5095
y2035	MLI	Developing country	6.57688	5.5627	6.55751	5.58948	6.31695
y2035	LBR	Developing country	1.51648	1.51605	1.52507	1.52471	1.52317
y2035	CIV	Developing country	14.0267	13.6353	14.2174	13.6547	13.9579
y2035	BFA	Developing country	4.90652	4.1089	4.61276	4.05637	4.75649
y2035	GHA	Developing country	9.57638	9.21068	9.50333	9.22037	9.52378
y2035	TGO	Developing country	2.92707	2.90817	2.91498	2.91095	2.9144
y2035	NER	Developing country	20.8306	16.3445	17.1382	16.8827	17.8732
y2035	BEN	Developing country	2.60682	2.44832	2.2963	2.2311	2.70187
y2035	DZA	Developing country	3.10356	3.09168	3.07067	3.06968	3.11576
y2035	NGA	Developing country	44.0374	40.936	38.1655	41.6275	38.8761
y2035	CMR	Developing country	12.3716	12.3337	12.3436	12.0884	12.3284
y2035	GAB	Developing country	2.03535	2.03429	2.0396	2.03926	2.03902
y2035	GNQ	Developing country	0.558702	0.558052	0.572211	0.571537	0.586409
y2035	NAM	Developing country	0.840654	0.902261	0.919472	0.965417	0.846512
y2035	AGO	Developing country	3.23351	3.39659	3.52904	3.37363	3.312
y2035	COG	Developing country	2.48225	2.48109	2.48723	2.48998	2.48569
y2035	COD	Developing country	23.4781	24.1578	24.0615	24.4	24.6265
y2035	LBY	Developing country	10.6673	10.6288	10.3633	10.3447	10.65
y2035	TCD	Developing country	4.59977	4.50573	4.48449	4.64082	4.47512
y2035	CAF	Developing country	4.62815	4.62964	4.63569	4.76527	4.62547
y2035	ZAF	Developing country	25.0737	21.0854	19.9775	24.8202	20.5622
y2035	BWA	Developing country	0.501791	0.519641	0.524955	0.521609	0.509907
y2035	ZMB	Developing country	1.32858	1.37792	1.3944	1.40748	1.39699
y2035	SDN	Developing country	30.1692	25.8927	27.3078	28.2962	27.9785
y2035	ZWE	Developing country	3.51692	3.36789	4.67644	4.2563	3.16574
y2035	LSO	Developing country	0.162777	0.163239	0.242419	0.16675	0.16196
y2035	BDI	Developing country	0.752798	0.774783	0.738545	0.73827	0.737441
y2035	RWA	Developing country	0.267877	0.286063	0.256052	0.255845	0.255842
y2035	TZA	Developing country	2.72285	2.59613	2.62158	2.65337	2.58262
y2035	UGA	Developing country	2.24802	2.38742	2.15449	2.15386	2.15359
y2035	MOZ	Developing country	2.04694	2.15774	3.34145	2.34979	1.93259
y2035	SWZ	Developing country	0.091705	0.080908	0.0908177	0.0966997	0.0831859
y2035	MWI	Developing country	0.347301	0.251189	0.31746	0.29495	0.291557
y2035	ETH	Developing country	8.51768	7.69351	8.36991	7.69025	8.18894
y2035	EGY	Developing country	50.1121	49.6634	47.7636	47.7238	49.9854
y2035	KEN	Developing country	3.94448	3.66195	3.90853	3.72147	3.72901
y2035	ERI	Developing country	0.48664	0.483736	0.486613	0.483745	0.483215
y2035	SOM	Developing country	3.98693	3.78325	3.79822	3.79856	3.37306
y2035	DJI	Developing country	0.00300422	0.00299282	0.00319959	0.00297803	0.00307377
y2035	MDG	Developing country	8.77377	9.08352	8.57735	9.22226	9.29546
y2035	MUS	Developing country	0	0	0	0	0
y2035	ATF	Developing country	0	0	0	0	0
y2035	CHN	Developing country	802.581	751.12	760.357	762.691	718.892
y2035	IND	Developing country	1225.96	1275.56	1292.13	1294.97	1165.55
y2035	NPL	Developing country	19.946	27.1851	25.0084	26.2675	29.427
y2035	MNG	Developing country	1.35377	1.28869	7.52181	1.37202	1.27501
y2035	MMR	Developing country	94.8668	94.6428	96.6366	98.1768	85.2849
y2035	LAO	Developing country	50.0004	74.8656	67.9646	73.3459	80.6133
y2035	THA	Developing country	116.436	91.9095	99.6344	93.8758	95.3298
y2035	KHM	Developing country	30.3329	28.8478	29.9237	29.9881	26.4656
y2035	VNM	Developing country	84.1243	120.787	110.498	116.269	130.474
y2035	RUS	Developing country	157.584	157.186	156.885	156.775	157.05
y2035	PRK	Developing country	12.2443	9.11104	8.87436	8.99298	11.0734
y2035	GRL	Developed income	1.07668	1.07667	1.07667	1.07667	1.07667
y2035	ISL	Developing country	0.88162	0.880592	0.881123	0.880734	0.880468
y2035	ESP	Developed income	31.4048	31.318	31.9602	31.9601	31.3055
y2035	IRL	Developing country	0.799544	0.798848	0.796408	0.799419	0.795821
y2035	PRT	Developing country	4.29403	4.29132	4.29403	4.29403	4.28953
y2035	GBR	Developed income	5.18403	4.39183	5.17268	5.17835	4.38863
y2035	FRA	Developed income	25.3801	22.6591	33.63	23.6151	22.6452
y2035	BEL	Developed income	0.705112	0.700742	0.703803	0.704076	0.699714
y2035	NLD	Developing country	0.687688	0.684146	0.686593	0.686797	0.683412
y2035	NOR	Developing country	3.28692	3.28268	3.28483	3.28345	3.28058
y2035	LUX	Developing country	0.0340027	0.0337237	0.0339265	0.0339407	0.0336407
y2035	DEU	Developed income	9.0651	8.90034	9.90318	9.90634	8.9008
y2035	CHE	Developed income	0.352319	0.351254	0.351734	0.351703	0.349364
y2035	ITA	Developing country	26.1689	25.8579	27.8998	27.8984	25.8723
y2035	DNK	Developed income	1.52427	1.51815	1.52085	1.52149	1.52081
y2035	AUT	Developed income	2.05222	1.24532	2.89195	2.89171	1.24403
y2035	SWE	Developing country	2.49405	3.73818	2.48684	2.49332	3.73106
y2035	CZE	Developed income	2.44848	2.41348	2.61131	2.61224	2.41455
y2035	HRV	Developing country	1.81769	1.56899	3.58759	3.586	1.56698
y2035	SVN	Developing country	0.30685	0.262025	0.621477	0.6212	0.261565
y2035	SJM	Developing country	0.072093	0.072093	0.072093	0.072093	0.072093
y2035	POL	Developing country	10.4699	10.4229	10.4462	10.4511	10.4347
y2035	BIH	Developing country	0.93039	0.926546	0.928237	0.928349	0.918843
y2035	HUN	Developing country	6.89692	5.88731	14.1913	14.1847	5.886
y2035	SVK	Developing country	1.77092	1.36385	2.51492	2.51484	1.36267
y2035	MNE	Developing country	0.181009	0.180254	0.180586	0.180609	0.17871
y2035	SRB	Developing country	3.5906	3.57566	3.58223	3.58268	3.55062
y2035	ALB	Developing country	0.519131	0.517436	0.518162	0.518215	0.514259
y2035	GRC	Developed income	7.82714	7.82706	7.82714	7.82714	7.82826
y2035	MKD	Developing country	0.612529	0.61031	0.611286	0.611354	0.606103
y2035	ROU	Developed income	15.2032	13.5395	15.0009	15.9911	13.5384
y2035	LTU	Developing country	2.18282	2.17231	2.17793	2.17884	2.17437
y2035	LVA	Developing country	0.680305	0.674231	0.67875	0.679096	0.671973
y2035	FIN	Developed income	1.83053	2.61878	1.82364	1.83044	2.61197
y2035	EST	Developed income	0.672978	0.670142	0.670871	0.672346	0.667669
y2035	BGR	Developing country	6.74386	6.24174	10.359	10.3563	6.24118
y2035	BLR	Developing country	2.8036	2.76061	2.75067	2.74221	2.77533
y2035	TUR	Developing country	18.3858	18.3754	18.38	18.3803	18.3562
y2035	MDA	Developing country	0.993684	0.976188	0.970022	0.965819	0.983034
y2035	CYP	Developed income	0.140894	0.14043	0.140894	0.140894	0.14034
y2035	IRN	Developing country	33.6857	33.6772	33.6833	33.6833	33.6809
y2035	UKR	Developing country	15.5739	15.3013	15.2061	15.1415	15.4075
y2035	GEO	Developing country	0.537432	0.530989	0.529658	0.528552	0.533086
y2035	ARM	Developing country	0.496373	0.507555	0.495274	0.495186	0.492729
y2035	AZE	Developing country	3.58602	3.75123	3.5753	3.5742	3.54791
y2035	KAZ	Developing country	22.3134	22.5888	22.2486	22.2437	22.1818
y2035	TKM	Developing country	8.75195	8.7824	8.74305	8.74211	8.69925
y2035	UZB	Developing country	19.4054	20.3036	19.3703	19.3666	19.2294
y2035	AFG	Developing country	9.45226	9.29439	9.33025	9.33729	9.38577
y2035	TJK	Developing country	3.65729	3.81449	3.64517	3.64405	3.60888
y2035	KGZ	Developing country	3.61339	3.76022	3.60562	3.6049	3.57973
y2035	MEX	Developing country	139.699	102.388	133.006	127.081	93.0153
y2035	USA	Developed income	294.004	277.477	285.307	286.781	260.596
y2035	GTM	Developing country	7.12956	4.59609	6.55156	6.6744	4.67167
y2035	ECU	Developing country	10.4568	10.3003	11.8783	10.4173	9.96867
y2035	SLV	Developing country	2.44331	2.0221	1.496	1.52127	2.00252
y2035	HND	Developing country	6.1166	4.70805	5.39153	5.52186	4.74521
y2035	BLZ	Developing country	0.841848	0.15422	0.882109	0.92433	0.15695
y2035	NIC	Developing country	6.11292	5.41473	5.3293	5.47086	5.3543
y2035	CRI	Developing country	2.62626	2.19391	2.4529	2.49097	1.94911
y2035	CUB	Developing country	9.2535	8.51528	9.06394	8.72405	8.41854
y2035	PAN	Developing country	4.07271	4.0467	3.59702	3.63522	3.39945
y2035	PER	Developing country	22.3214	21.6677	22.0265	22.0041	19.5436
y2035	COL	Developing country	37.9255	36.7411	36.5762	35.9462	30.6572
y2035	BHS	Developed income	0.0642193	0.00350804	0.067973	0.0719065	0.00357014
y2035	JAM	Developing country	0.359321	0.275335	0.360859	0.362634	0.284546
y2035	CHL	Developed income	30.9599	28.7886	30.3375	30.3494	28.2928
y2035	HTI	Developing country	2.31244	2.21638	1.88649	1.86408	2.23294
y2035	BRA	Developing country	166.632	166.065	178.523	166.041	162.558
y2035	ARG	Developing country	37.3795	35.0132	37.0646	36.9933	34.0978
y2035	VEN	Developing country	42.1017	41.6825	42.0797	41.9824	50.6249
y2035	DOM	Developing country	4.20943	3.27188	4.04695	3.88769	3.14072
y2035	BOL	Developing country	8.72339	7.98165	8.34161	8.35404	7.71605
y2035	PRY	Developing country	4.03101	3.94037	4.01128	4.01216	4.02549
y2035	TTO	Developing country	1.51154	1.51145	1.5115	1.51153	0.372984
y2035	FLK	Developing country	9e-15	9e-15	9e-15	9e-15	8e-15
y2035	GUY	Developing country	11.1895	11.1047	11.0588	11.1177	7.53099
y2035	URY	Developed income	8.39111	8.28586	8.37554	8.37508	8.35997
y2035	SUR	Developing country	1.71561	1.7143	1.71553	1.71555	3.08885
y2035	GUF	Developing country	0.190627	0.189611	0.190604	0.190605	2.26309
y2035	SGS	Developing country	1e-15	1e-15	1e-15	1e-15	0
y2035	MAR	Developing country	38.0712	38.1728	38.1288	38.0626	38.0702
y2035	TUN	Developing country	5.61975	5.28218	3.98266	3.96483	5.53114
y2035	SAU	Developing country	7.91434	7.62269	7.82575	7.82558	7.73604
y2035	ISR	Developing country	0.631872	0.631872	0.631872	0.631872	0.631872
y2035	JOR	Developing country	0.322643	0.322643	0.322643	0.322643	0.322643
y2035	LBN	Developing country	1.05954	1.05949	1.05954	1.05954	1.05954
y2035	SYR	Developing country	3.02109	3.02117	3.02109	3.02109	3.02109
y2035	IRQ	Developing country	4.8407	4.84004	4.84049	4.83928	4.84049
y2035	YEM	Developing country	3.37853	3.30149	3.35508	3.35508	3.33149
y2035	KWT	Developing country	0.1745	0.1745	0.1745	0.1745	0.1745
y2035	QAT	Developing country	0.00857116	0.00857116	0.00857116	0.00857116	0.00857116
y2035	OMN	Developing country	0.185856	0.164938	0.179487	0.179487	0.173085
y2035	ARE	Developed income	0.153684	0.153684	0.153684	0.153684	0.153684
y2035	PAK	Developing country	103.791	99.6851	100.804	99.8646	101.705
y2035	CAN	Developed income	62.0459	61.7023	61.8136	61.7696	61.6358
y2035	PRI	Developing country	0.295046	0.201242	0.297534	0.300225	0.206216
y2035	AUS	Developed income	22.3063	21.1879	36.0396	26.5501	19.9773
y2035	JPN	Developing country	31.9926	32.6733	30.5539	31.1663	34.1434
y2035	NZL	Developing country	11.3202	11.3081	11.312	11.3104	11.2834
y2035	IDN	Developing country	96.1465	97.1501	96.6458	97.0464	97.482
y2035	MYS	Developing country	17.1159	17.1051	16.5706	17.1096	17.1413
y2035	SGP	Developing country	0.0496046	0.0495684	0.0471775	0.0495833	0.0496907
y2035	BRN	Developed income	0.0860267	0.0859637	0.111798	0.0859897	0.086176
y2035	PHL	Developing country	28.6331	26.5037	26.4334	26.5987	27.131
y2035	TLS	Developing country	0.8328	0.8328	0.821342	0.827083	0.8328
y2035	KOR	Developing country	12.9678	9.90532	8.77125	9.58335	11.8308
y2035	PNG	Developing country	4.98311	6.17067	7.04041	6.07834	6.54618
y2035	SLB	Developing country	0.0643543	0.0643072	0.161621	0.0643267	0.064466
y2035	NCL	Developing country	0.12945	0.176054	0.248164	0.185195	0.13613
y2035	VUT	Developing country	0.0396026	0.0395736	0.0436331	0.0395855	0.0396713
y2035	FJI	Developing country	0.29089	0.288457	0.303243	0.290992	0.287438
y2035	REU	Developing country	0.007028	0.00717288	0.00595611	0.00699442	0.00698775
y2035	LKA	Developing country	15.0224	21.3753	19.746	20.633	22.7557
y2035	BGD	Developing country	53.2454	72.3248	68.6006	68.5986	76.0013
y2035	BTN	Developing country	0.441118	0.393306	0.376972	0.38448	0.420326
y2040	SEN	Developing country	4.31298	3.86669	4.08324	3.90837	4.07114
y2040	GMB	Developing country	0.0924992	0.0756245	0.0839002	0.0754695	0.0923758
y2040	MRT	Developing country	1.14863	1.13679	1.19377	1.13503	1.15915
y2040	ESH	Developing country	3.4e-14	3.4e-14	3.1e-14	3.1e-14	3.4e-14
y2040	GNB	Developing country	0.546579	0.446879	0.53364	0.445951	0.54585
y2040	GIN	Developing country	5.84486	5.11104	5.93183	5.1061	5.82841
y2040	SLE	Developing country	1.65391	1.6218	1.66206	1.62309	1.64469
y2040	MLI	Developing country	6.56968	5.63131	6.60815	5.64433	6.36785
y2040	LBR	Developing country	1.64477	1.64358	1.65344	1.64929	1.63809
y2040	CIV	Developing country	15.157	14.7727	15.3482	14.7861	15.0772
y2040	BFA	Developing country	4.93871	4.16305	4.64871	4.0983	4.79191
y2040	GHA	Developing country	10.2963	9.93863	10.2229	9.94434	10.243
y2040	TGO	Developing country	3.15173	3.13287	3.13959	3.13582	3.13877
y2040	NER	Developing country	18.9808	16.4135	17.2171	16.9617	17.9264
y2040	BEN	Developing country	2.61397	2.58176	2.42132	2.35692	2.83912
y2040	DZA	Developing country	3.04336	3.0517	3.01084	3.00059	3.05544
y2040	NGA	Developing country	45.6664	42.9169	43.5708	43.1155	40.8892
y2040	CMR	Developing country	12.6946	12.6589	12.6659	12.405	12.6319
y2040	GAB	Developing country	2.02393	2.02222	2.02828	2.02609	2.02133
y2040	GNQ	Developing country	0.555358	0.553638	0.569007	0.561408	0.558851
y2040	NAM	Developing country	0.845512	0.902189	0.970861	0.993624	0.848934
y2040	AGO	Developing country	3.44743	3.3528	3.5544	3.39651	3.3257
y2040	COG	Developing country	2.4841	2.48221	2.48919	2.48978	2.4803
y2040	COD	Developing country	24.2178	24.2485	24.5488	24.465	24.2933
y2040	LBY	Developing country	10.5766	10.5805	10.2742	10.2281	10.5584
y2040	TCD	Developing country	4.65473	4.56883	4.54424	4.70033	4.53462
y2040	CAF	Developing country	4.57495	4.56675	4.57646	4.70645	4.5656
y2040	ZAF	Developing country	24.3063	21.4856	23.2672	25.3664	20.9608
y2040	BWA	Developing country	0.500797	0.518549	0.524139	0.520782	0.50897
y2040	ZMB	Developing country	1.44806	1.49657	1.53888	1.53254	1.51941
y2040	SDN	Developing country	30.9386	27.2482	27.8715	28.5062	28.0212
y2040	ZWE	Developing country	3.65295	3.40218	4.97626	4.41699	3.19068
y2040	LSO	Developing country	0.182856	0.18265	0.273008	0.187272	0.182259
y2040	BDI	Developing country	0.870951	0.803729	0.813358	0.812977	0.811618
y2040	RWA	Developing country	0.366853	0.312226	0.31965	0.319392	0.319021
y2040	TZA	Developing country	2.90275	2.68316	2.75346	2.78252	2.70561
y2040	UGA	Developing country	3.03767	2.60967	2.66807	2.66724	2.66419
y2040	MOZ	Developing country	2.26611	2.26989	3.54614	2.47349	2.04273
y2040	SWZ	Developing country	0.0932716	0.0831578	0.0919243	0.0981837	0.0850178
y2040	MWI	Developing country	0.373822	0.259745	0.290356	0.289005	0.290547
y2040	ETH	Developing country	9.02039	8.51781	8.78795	8.51453	8.97644
y2040	EGY	Developing country	49.5578	49.4266	47.2206	46.9677	49.4251
y2040	KEN	Developing country	4.1122	3.89534	4.08789	4.02046	3.98616
y2040	ERI	Developing country	0.517263	0.513994	0.517058	0.514324	0.513536
y2040	SOM	Developing country	3.94917	3.88988	3.90429	3.90478	3.26854
y2040	DJI	Developing country	0.00288016	0.00285428	0.00305839	0.00285518	0.00294115
y2040	MDG	Developing country	9.35114	9.35763	8.92018	8.47845	9.34264
y2040	MUS	Developing country	0	0	0	0	0
y2040	ATF	Developing country	0	0	0	0	0
y2040	CHN	Developing country	808.483	743.693	755.825	760.387	712.838
y2040	IND	Developing country	1194.47	1265.61	1264.74	1261.21	1144
y2040	NPL	Developing country	20.232	27.079	24.7313	25.9847	28.8276
y2040	MNG	Developing country	1.38235	1.31301	7.45056	1.39614	1.29946
y2040	MMR	Developing country	99.28	94.7167	98.7448	97.5468	85.6524
y2040	LAO	Developing country	51.9911	75.3611	67.7887	73.4492	79.4901
y2040	THA	Developing country	116.483	91.8289	96.8274	93.1081	95.415
y2040	KHM	Developing country	31.3694	28.8418	30.2927	29.7644	26.5276
y2040	VNM	Developing country	86.6062	120.752	109.466	115.463	128.472
y2040	RUS	Developing country	158.01	157.925	157.248	157.211	157.542
y2040	PRK	Developing country	11.8889	9.12752	8.92987	8.973	10.7887
y2040	GRL	Developed income	1.07215	1.07215	1.07215	1.07215	1.07215
y2040	ISL	Developing country	0.868495	0.867926	0.86807	0.86807	0.8678
y2040	ESP	Developed income	30.3919	30.3085	30.9367	30.9347	30.2924
y2040	IRL	Developing country	0.784309	0.783831	0.78176	0.784187	0.780615
y2040	PRT	Developing country	4.11048	4.10721	4.11048	4.11048	4.10569
y2040	GBR	Developed income	5.05893	4.2727	5.04816	5.05344	4.25687
y2040	FRA	Developed income	24.8163	22.1593	32.6754	23.6002	22.1313
y2040	BEL	Developed income	0.68318	0.681151	0.681821	0.682177	0.677803
y2040	NLD	Developing country	0.666756	0.665226	0.665613	0.665894	0.66251
y2040	NOR	Developing country	3.24029	3.23801	3.23879	3.23891	3.23592
y2040	LUX	Developing country	0.032878	0.0327398	0.0327983	0.0328179	0.0325207
y2040	DEU	Developed income	8.75865	8.6294	9.57661	9.57809	8.59647
y2040	CHE	Developed income	0.350483	0.349993	0.350446	0.350647	0.348207
y2040	ITA	Developing country	25.5614	25.2618	27.2518	27.2446	25.2782
y2040	DNK	Developed income	1.47054	1.47054	1.46697	1.46785	1.46686
y2040	AUT	Developed income	2.01963	1.21836	2.84181	2.83876	1.2154
y2040	SWE	Developing country	2.45641	3.69972	2.45042	2.4557	3.69119
y2040	CZE	Developed income	2.36661	2.34121	2.52551	2.52621	2.33303
y2040	HRV	Developing country	1.78153	1.53758	3.51609	3.5086	1.5348
y2040	SVN	Developing country	0.301116	0.257084	0.609958	0.60863	0.256368
y2040	SJM	Developing country	0.0711351	0.0711351	0.0711351	0.0711351	0.0711351
y2040	POL	Developing country	10.1142	10.1087	10.0895	10.0959	10.0778
y2040	BIH	Developing country	0.932641	0.930931	0.932753	0.933605	0.923668
y2040	HUN	Developing country	6.74871	5.7589	13.8888	13.8579	5.75816
y2040	SVK	Developing country	1.73251	1.3297	2.46037	2.45785	1.32584
y2040	MNE	Developing country	0.181535	0.181199	0.181558	0.181726	0.179739
y2040	SRB	Developing country	3.59628	3.58964	3.59673	3.60005	3.56671
y2040	ALB	Developing country	0.51856	0.517832	0.518614	0.518998	0.51488
y2040	GRC	Developed income	7.6368	7.63618	7.6368	7.6368	7.63802
y2040	MKD	Developing country	0.612527	0.611541	0.612596	0.613089	0.607617
y2040	ROU	Developed income	14.8999	13.2684	14.4533	15.4041	13.2672
y2040	LTU	Developing country	2.10956	2.10786	2.10444	2.1057	2.1009
y2040	LVA	Developing country	0.659938	0.656621	0.658322	0.65876	0.651717
y2040	FIN	Developed income	1.79353	2.58322	1.78801	1.79344	2.57643
y2040	EST	Developed income	0.656701	0.655271	0.65482	0.656085	0.651455
y2040	BGR	Developing country	6.61738	6.12545	10.1578	10.1429	6.12456
y2040	BLR	Developing country	2.81203	2.78088	2.75468	2.75201	2.7815
y2040	TUR	Developing country	18.2123	18.2077	18.2126	18.2149	18.1898
y2040	MDA	Developing country	0.995839	0.98373	0.970332	0.968737	0.982716
y2040	CYP	Developed income	0.134396	0.133749	0.134396	0.134396	0.133813
y2040	IRN	Developing country	33.7935	33.7831	33.7895	33.7888	33.7869
y2040	UKR	Developing country	15.6061	15.4171	15.2096	15.1855	15.4017
y2040	GEO	Developing country	0.539246	0.534501	0.530826	0.530553	0.534654
y2040	ARM	Developing country	0.49292	0.510441	0.491863	0.491789	0.489604
y2040	AZE	Developing country	3.53214	3.73324	3.52237	3.52164	3.49945
y2040	KAZ	Developing country	22.1113	22.9281	22.0453	22.0406	21.9955
y2040	TKM	Developing country	8.69174	8.60843	8.68492	8.68428	8.6474
y2040	UZB	Developing country	19.0814	19.9224	19.0556	19.0531	18.9399
y2040	AFG	Developing country	9.41716	9.34864	9.38076	9.38978	9.40119
y2040	TJK	Developing country	3.60953	3.77474	3.59666	3.59576	3.56484
y2040	KGZ	Developing country	3.562	3.73332	3.55527	3.55473	3.53291
y2040	MEX	Developing country	144.676	118.16	134.721	135.023	92.8069
y2040	USA	Developed income	286.962	270.604	282.631	280.148	257.238
y2040	GTM	Developing country	7.32492	4.88194	6.55016	6.65967	4.63863
y2040	ECU	Developing country	12.58	10.304	12.5152	12.5201	10.0146
y2040	SLV	Developing country	2.72808	2.0253	1.50771	1.53441	2.02071
y2040	HND	Developing country	6.41856	4.86922	5.42818	5.55441	4.71462
y2040	BLZ	Developing country	0.840393	0.172255	0.881596	0.9185	0.158134
y2040	NIC	Developing country	6.34085	5.47418	5.46962	5.57678	5.38279
y2040	CRI	Developing country	2.61918	2.24295	2.61474	2.59806	1.94746
y2040	CUB	Developing country	9.18504	9.72042	8.9747	8.84399	8.42876
y2040	PAN	Developing country	4.06582	4.05236	4.01847	3.92393	3.40133
y2040	PER	Developing country	23.2381	21.6151	22.7207	22.8142	19.5598
y2040	COL	Developing country	38.8585	37.1322	38.7827	38.2902	30.7376
y2040	BHS	Developed income	0.0641919	0.00399133	0.0680346	0.0714733	0.00366414
y2040	JAM	Developing country	0.358851	0.296923	0.360439	0.361986	0.285571
y2040	CHL	Developed income	30.3055	28.1265	29.7038	29.7458	27.673
y2040	HTI	Developing country	2.41126	2.36566	1.87434	1.85667	2.23777
y2040	BRA	Developing country	186.329	169.226	183.014	184.857	165.34
y2040	ARG	Developing country	41.3833	34.6187	41.0537	41.0815	34.0088
y2040	VEN	Developing country	42.5901	42.2597	42.5717	42.5786	50.846
y2040	DOM	Developing country	4.22403	3.79318	4.00772	3.99126	3.1419
y2040	BOL	Developing country	8.89467	8.07295	8.42573	8.46509	7.9343
y2040	PRY	Developing country	4.22284	4.02331	4.19958	4.19957	4.18516
y2040	TTO	Developing country	1.52606	1.52589	1.52599	1.52599	0.375323
y2040	FLK	Developing country	9e-15	9e-15	9e-15	9e-15	8e-15
y2040	GUY	Developing country	11.3002	11.2157	11.1749	11.229	7.62725
y2040	URY	Developed income	8.36334	8.16051	8.25611	8.25582	8.23973
y2040	SUR	Developing country	1.74201	1.74036	1.74194	1.74193	3.13695
y2040	GUF	Developing country	0.195226	0.193967	0.195206	0.195204	2.29732
y2040	SGS	Developing country	1e-15	1e-15	1e-15	1e-15	0
y2040	MAR	Developing country	37.937	38.0388	37.9946	37.9278	37.936
y2040	TUN	Developing country	5.55876	5.4417	3.93303	3.77193	5.46609
y2040	SAU	Developing country	7.80923	7.48258	7.677	7.65259	7.5917
y2040	ISR	Developing country	0.604328	0.604328	0.604328	0.604328	0.604328
y2040	JOR	Developing country	0.310842	0.310842	0.310842	0.310842	0.310842
y2040	LBN	Developing country	0.881138	0.881092	0.881138	0.881138	0.881138
y2040	SYR	Developing country	3.03991	3.03999	3.03991	3.03991	3.03991
y2040	IRQ	Developing country	4.89604	4.89538	4.89584	4.89467	4.89584
y2040	YEM	Developing country	3.47827	3.39266	3.44358	3.43722	3.42132
y2040	KWT	Developing country	0.195434	0.195434	0.195434	0.195434	0.195434
y2040	QAT	Developing country	0.00625675	0.00625675	0.00625675	0.00625675	0.00625675
y2040	OMN	Developing country	0.180005	0.156746	0.170578	0.168849	0.164535
y2040	ARE	Developed income	0.103026	0.103026	0.103026	0.103026	0.103026
y2040	PAK	Developing country	101.796	98.4763	99.0717	98.55	100.184
y2040	CAN	Developed income	62.6756	62.2629	62.378	62.3302	62.2308
y2040	PRI	Developing country	0.294283	0.220921	0.296834	0.299188	0.207047
y2040	AUS	Developed income	22.0418	20.9515	38.0375	31.2699	20.9234
y2040	JPN	Developing country	31.4427	32.076	31.085	31.3973	32.3858
y2040	NZL	Developing country	11.4641	11.4227	11.4535	11.4518	11.4265
y2040	IDN	Developing country	97.8905	99.1958	98.6639	99.0702	99.4892
y2040	MYS	Developing country	17.2191	17.324	16.7808	17.3302	17.3625
y2040	SGP	Developing country	0.0500311	0.0503865	0.0479564	0.0504075	0.0505171
y2040	BRN	Developed income	0.0870986	0.0877175	0.11392	0.087754	0.0879448
y2040	PHL	Developing country	28.7183	26.6401	26.2138	26.6389	27.2627
y2040	TLS	Developing country	0.861423	0.861423	0.843774	0.855549	0.861423
y2040	KOR	Developing country	12.9537	9.92229	8.84078	9.56077	11.6679
y2040	PNG	Developing country	5.10609	6.24644	7.07682	6.13723	6.53791
y2040	SLB	Developing country	0.0662137	0.0666842	0.165553	0.0667119	0.066857
y2040	NCL	Developing country	0.144534	0.177554	0.262937	0.185509	0.138169
y2040	VUT	Developing country	0.040045	0.0403296	0.0444512	0.0403464	0.0404341
y2040	FJI	Developing country	0.295737	0.295026	0.308055	0.297379	0.294207
y2040	REU	Developing country	0.00776444	0.00780543	0.0065785	0.00772339	0.00778722
y2040	LKA	Developing country	15.4856	21.4313	19.6524	20.5639	22.5114
y2040	BGD	Developing country	54.3308	71.471	67.3733	67.1308	74.7372
y2040	BTN	Developing country	0.453272	0.394964	0.377077	0.385198	0.423588
y2045	SEN	Developing country	4.33492	3.89253	4.11359	3.94338	4.09669
y2045	GMB	Developing country	0.092371	0.0759499	0.0837753	0.0755544	0.0922175
y2045	MRT	Developing country	1.15009	1.13798	1.20593	1.13673	1.15888
y2045	ESH	Developing country	3.5e-14	3.4e-14	3.3e-14	3.1e-14	3.4e-14
y2045	GNB	Developing country	0.546479	0.449342	0.533461	0.446989	0.54557
y2045	GIN	Developing country	6.03289	5.31697	6.11892	5.30178	6.01486
y2045	SLE	Developing country	1.80989	1.77825	1.81783	1.77928	1.80037
y2045	MLI	Developing country	6.59857	5.67696	6.64433	5.68963	6.39774
y2045	LBR	Developing country	1.79156	1.78914	1.79644	1.79344	1.78195
y2045	CIV	Developing country	16.4542	16.0756	16.6407	16.084	16.37
y2045	BFA	Developing country	4.95424	4.19502	4.66837	4.12951	4.80757
y2045	GHA	Developing country	11.1196	10.769	11.045	10.7707	11.0646
y2045	TGO	Developing country	3.40591	3.38683	3.39345	3.38989	3.39237
y2045	NER	Developing country	18.514	16.407	17.2693	16.9825	17.8647
y2045	BEN	Developing country	2.75592	2.726	2.55774	2.49438	2.98689
y2045	DZA	Developing country	3.03615	2.95324	2.92977	2.91192	2.94788
y2045	NGA	Developing country	47.5138	45.023	45.4412	45.0093	43.058
y2045	CMR	Developing country	13.0092	12.9694	12.9596	12.7177	12.9253
y2045	GAB	Developing country	2.00659	2.00396	2.00922	2.00737	2.00239
y2045	GNQ	Developing country	0.549164	0.54578	0.556187	0.550656	0.547684
y2045	NAM	Developing country	1.9461	1.97609	2.06639	2.10643	1.95113
y2045	AGO	Developing country	4.19836	4.23103	4.36722	4.35192	4.13246
y2045	COG	Developing country	2.48078	2.47784	2.48387	2.4848	2.47513
y2045	COD	Developing country	24.3636	24.5061	24.5642	24.5541	24.3351
y2045	LBY	Developing country	10.4135	10.4116	10.267	10.0854	10.3953
y2045	TCD	Developing country	4.68571	4.59679	4.56523	4.73697	4.55109
y2045	CAF	Developing country	4.47014	4.46907	4.47239	4.60436	4.46037
y2045	ZAF	Developing country	38.7317	33.5199	38.1228	38.3204	35.8921
y2045	BWA	Developing country	2.27931	2.29701	2.29173	2.29917	2.29056
y2045	ZMB	Developing country	1.59095	1.64835	1.69736	1.70267	1.63068
y2045	SDN	Developing country	38.8161	30.4554	28.8848	28.7603	28.4081
y2045	ZWE	Developing country	6.54269	6.41068	7.96061	8.09939	6.20499
y2045	LSO	Developing country	0.20599	0.206044	0.308066	0.210859	0.204758
y2045	BDI	Developing country	0.914484	0.932725	0.89769	0.897216	0.890598
y2045	RWA	Developing country	0.405541	0.420786	0.391726	0.391412	0.386772
y2045	TZA	Developing country	3.28121	3.24791	3.27	3.26699	3.21846
y2045	UGA	Developing country	3.36083	3.47634	3.2507	3.24967	3.21346
y2045	MOZ	Developing country	2.57614	2.63836	3.92316	3.93916	2.37539
y2045	SWZ	Developing country	0.0935418	0.0862436	0.094588	0.0943754	0.0876011
y2045	MWI	Developing country	0.403404	0.27354	0.293476	0.283191	0.297575
y2045	ETH	Developing country	11.0798	10.5534	10.7808	10.621	10.8761
y2045	EGY	Developing country	48.623	48.4574	47.4545	46.1884	48.4903
y2045	KEN	Developing country	4.63068	4.49955	4.63764	4.60417	4.51619
y2045	ERI	Developing country	0.55113	0.547537	0.551281	0.548179	0.546986
y2045	SOM	Developing country	21.7413	21.1538	21.7414	21.7414	16.4087
y2045	DJI	Developing country	0.00270881	0.00268398	0.00291295	0.00268496	0.00276119
y2045	MDG	Developing country	9.7719	9.82118	9.45446	8.80561	9.58368
y2045	MUS	Developing country	0	0	0	0	0
y2045	ATF	Developing country	0	0	0	0	0
y2045	CHN	Developing country	810.91	737.739	743.832	756.179	709.603
y2045	IND	Developing country	1164.4	1232.79	1247.58	1238.86	1119.78
y2045	NPL	Developing country	21.4074	27.0862	24.4389	25.3509	28.3651
y2045	MNG	Developing country	1.4064	1.33264	7.44925	1.40345	1.31916
y2045	MMR	Developing country	100.33	94.5785	99.7315	96.1003	85.5001
y2045	LAO	Developing country	55.679	77.1793	67.4957	72.4397	78.5657
y2045	THA	Developing country	117.672	91.7896	95.1026	91.9154	95.1736
y2045	KHM	Developing country	31.6674	28.8281	30.4362	29.3675	26.4707
y2045	VNM	Developing country	92.5436	121.77	108.477	113.456	126.814
y2045	RUS	Developing country	157.954	157.747	157.195	157.156	157.235
y2045	PRK	Developing country	11.6808	8.54769	8.8266	7.99245	10.5559
y2045	GRL	Developed income	1.06641	1.06641	1.06641	1.06641	1.06641
y2045	ISL	Developing country	0.859083	0.858862	0.859008	0.859008	0.858735
y2045	ESP	Developed income	29.4999	29.4182	30.0352	30.0326	29.4008
y2045	IRL	Developing country	0.776002	0.775461	0.7757	0.775718	0.772203
y2045	PRT	Developing country	3.94487	3.94171	3.94487	3.94487	3.93989
y2045	GBR	Developed income	4.98787	4.19729	4.98056	4.98165	4.17609
y2045	FRA	Developed income	24.3346	21.7323	31.8447	22.7581	21.6978
y2045	BEL	Developed income	0.669417	0.668357	0.668115	0.668316	0.664008
y2045	NLD	Developing country	0.653277	0.652578	0.65216	0.652333	0.649013
y2045	NOR	Developing country	3.20752	3.20647	3.20726	3.20743	3.20442
y2045	LUX	Developing country	0.0322221	0.0321424	0.032144	0.0321561	0.0318648
y2045	DEU	Developed income	8.56827	8.45495	9.37007	9.36884	8.40758
y2045	CHE	Developed income	0.350067	0.349619	0.350064	0.350334	0.347932
y2045	ITA	Developing country	25.0551	24.7645	26.7106	26.7023	24.7823
y2045	DNK	Developed income	1.4293	1.43178	1.42584	1.42637	1.4254
y2045	AUT	Developed income	1.99871	1.19809	2.80555	2.80165	1.19439
y2045	SWE	Developing country	2.43826	3.68672	2.43704	2.43717	3.67766
y2045	CZE	Developed income	2.31682	2.29563	2.47265	2.47264	2.28345
y2045	HRV	Developing country	1.74822	1.50887	3.45101	3.4425	1.50559
y2045	SVN	Developing country	0.295723	0.252479	0.599246	0.59773	0.251583
y2045	SJM	Developing country	0.0702115	0.0702115	0.0702115	0.0702115	0.0702115
y2045	POL	Developing country	9.90352	9.9151	9.87984	9.8835	9.86564
y2045	BIH	Developing country	0.93838	0.936621	0.938414	0.939558	0.929777
y2045	HUN	Developing country	6.61242	5.6419	13.6157	13.5806	5.64154
y2045	SVK	Developing country	1.70659	1.30489	2.4204	2.41706	1.29989
y2045	MNE	Developing country	0.182733	0.182387	0.18274	0.182966	0.181008
y2045	SRB	Developing country	3.61632	3.60949	3.61646	3.62091	3.58849
y2045	ALB	Developing country	0.519735	0.518985	0.519751	0.520266	0.516242
y2045	GRC	Developed income	7.4722	7.47165	7.4722	7.4722	7.47349
y2045	MKD	Developing country	0.614215	0.613198	0.614236	0.614898	0.609537
y2045	ROU	Developed income	14.6304	13.0295	13.9671	14.9105	13.0284
y2045	LTU	Developing country	2.06586	2.06777	2.06085	2.06163	2.0569
y2045	LVA	Developing country	0.648461	0.646294	0.646926	0.647163	0.640247
y2045	FIN	Developed income	1.77132	2.56588	1.77087	1.77088	2.5592
y2045	EST	Developed income	0.647504	0.646594	0.646639	0.64676	0.642215
y2045	BGR	Developing country	6.50649	6.02421	9.98046	9.96312	6.0232
y2045	BLR	Developing country	2.78969	2.76015	2.73119	2.73079	2.73917
y2045	TUR	Developing country	18.0068	18.002	18.0069	18.0099	17.9853
y2045	MDA	Developing country	0.98584	0.974438	0.959669	0.959747	0.96404
y2045	CYP	Developed income	0.128676	0.128057	0.128676	0.128676	0.128073
y2045	IRN	Developing country	33.3866	33.3728	33.3795	33.3795	33.3768
y2045	UKR	Developing country	15.4483	15.2704	15.0417	15.0433	15.1093
y2045	GEO	Developing country	0.536688	0.53218	0.528114	0.52813	0.529202
y2045	ARM	Developing country	0.488953	0.501474	0.488301	0.488491	0.486432
y2045	AZE	Developing country	3.47322	3.65917	3.46912	3.47271	3.45169
y2045	KAZ	Developing country	21.876	22.1848	21.819	21.8194	21.7779
y2045	TKM	Developing country	8.58384	8.52537	8.58542	8.59158	8.55745
y2045	UZB	Developing country	18.7112	19.6317	18.7191	18.7448	18.6427
y2045	AFG	Developing country	9.42743	9.35042	9.39291	9.138	9.41071
y2045	TJK	Developing country	3.55266	3.7259	3.548	3.55033	3.52118
y2045	KGZ	Developing country	3.50509	3.66957	3.5035	3.5069	3.48676
y2045	MEX	Developing country	146.202	124.791	145.851	131.673	92.3159
y2045	USA	Developed income	282.067	265.252	275.007	270.844	250.457
y2045	GTM	Developing country	7.39801	4.88792	7.1897	6.35934	4.6882
y2045	ECU	Developing country	12.7346	11.9105	12.6671	12.6792	10.0959
y2045	SLV	Developing country	2.8831	2.0011	2.38168	1.53038	2.03176
y2045	HND	Developing country	6.57992	4.88135	6.50217	5.46221	4.81553
y2045	BLZ	Developing country	0.831788	0.173729	0.872456	0.85934	0.156889
y2045	NIC	Developing country	6.45909	5.46833	6.21829	5.54844	5.39002
y2045	CRI	Developing country	2.60378	2.24021	2.59895	2.53169	1.92092
y2045	CUB	Developing country	9.08051	9.99759	8.92741	8.34444	8.33602
y2045	PAN	Developing country	4.05016	4.03835	4.00262	3.89776	3.33376
y2045	PER	Developing country	23.3076	21.5045	22.6934	22.8661	20.3066
y2045	COL	Developing country	39.5311	38.2225	39.2586	38.432	30.8067
y2045	BHS	Developed income	0.0635525	0.00407904	0.0673463	0.0668857	0.00368365
y2045	JAM	Developing country	0.358071	0.299904	0.359604	0.346604	0.28301
y2045	CHL	Developed income	29.3863	28.8863	28.8931	28.8395	27.1918
y2045	HTI	Developing country	2.45585	2.35785	2.20349	1.77104	2.22108
y2045	BRA	Developing country	226.128	190.697	207.547	201.649	169.068
y2045	ARG	Developing country	78.162	36.0383	60.2639	40.6934	33.8066
y2045	VEN	Developing country	42.8839	42.7107	42.8656	42.8724	45.7959
y2045	DOM	Developing country	4.19536	3.97145	4.15375	3.79695	3.11084
y2045	BOL	Developing country	8.97743	8.13757	8.75212	8.52821	8.36838
y2045	PRY	Developing country	4.66603	4.12974	4.47943	4.29534	4.22093
y2045	TTO	Developing country	1.54152	1.54136	1.54141	1.54143	0.343841
y2045	FLK	Developing country	9e-15	8e-15	9e-15	9e-15	8e-15
y2045	GUY	Developing country	11.4371	11.3371	11.3278	11.3503	7.57753
y2045	URY	Developed income	32.6775	8.09396	20.7613	8.2152	8.17644
y2045	SUR	Developing country	1.77184	1.77014	1.77172	1.77172	3.19303
y2045	GUF	Developing country	0.199315	0.198025	0.199287	0.199283	2.33675
y2045	SGS	Developing country	1e-15	1e-15	1e-15	1e-15	0
y2045	MAR	Developing country	37.5501	37.6511	37.6076	37.5413	37.5491
y2045	TUN	Developing country	5.43169	5.28803	4.61224	3.7519	5.33924
y2045	SAU	Developing country	6.69354	6.29048	6.47782	6.47771	6.39643
y2045	ISR	Developing country	0.586142	0.586142	0.586142	0.586142	0.586142
y2045	JOR	Developing country	0.303379	0.303379	0.303379	0.303379	0.303379
y2045	LBN	Developing country	0.830232	0.830187	0.830232	0.830232	0.830232
y2045	SYR	Developing country	3.09554	3.09562	3.09554	3.09554	3.09554
y2045	IRQ	Developing country	4.93864	4.93797	4.93845	4.93732	4.93845
y2045	YEM	Developing country	3.67907	3.57463	3.62315	3.62314	3.60215
y2045	KWT	Developing country	0.138934	0.138934	0.138934	0.138934	0.138934
y2045	QAT	Developing country	0.00460689	0.00460689	0.00460689	0.00460689	0.00460689
y2045	OMN	Developing country	0.176432	0.147851	0.161126	0.161126	0.155384
y2045	ARE	Developed income	0.0727832	0.0727832	0.0727832	0.0727832	0.0727832
y2045	PAK	Developing country	100.799	97.0601	97.4685	96.6394	98.8167
y2045	CAN	Developed income	63.317	62.8956	63.0341	62.9857	62.8622
y2045	PRI	Developing country	0.293851	0.223658	0.296374	0.284123	0.205979
y2045	AUS	Developed income	21.9412	20.8927	37.1684	32.1038	20.8842
y2045	JPN	Developing country	31.1857	31.6498	31.889	32.1462	32.5474
y2045	NZL	Developing country	11.617	11.5758	11.607	11.6053	11.5796
y2045	IDN	Developing country	101.037	102.162	101.631	102.025	102.442
y2045	MYS	Developing country	17.4345	17.5347	16.9995	17.5588	17.5895
y2045	SGP	Developing country	0.0508023	0.0511422	0.0487291	0.051224	0.0513278
y2045	BRN	Developed income	0.0887399	0.0893336	0.115998	0.0894765	0.0896579
y2045	PHL	Developing country	29.1221	26.7694	26.1251	26.6306	27.3561
y2045	TLS	Developing country	0.907953	0.91374	0.889376	0.907551	0.91374
y2045	KOR	Developing country	12.7297	9.28774	8.73508	8.50502	11.4186
y2045	PNG	Developing country	5.3347	6.39394	7.12045	6.13487	6.54169
y2045	SLB	Developing country	0.0684544	0.0689125	0.169396	0.0690227	0.0691626
y2045	NCL	Developing country	0.147568	0.178724	0.272002	0.184891	0.139552
y2045	VUT	Developing country	0.0407565	0.0410292	0.0452575	0.0410948	0.0411781
y2045	FJI	Developing country	0.302564	0.301471	0.315199	0.303614	0.301139
y2045	REU	Developing country	0.00856868	0.00867475	0.00725583	0.00851715	0.00851077
y2045	LKA	Developing country	16.6025	21.7404	19.6186	20.4496	22.3805
y2045	BGD	Developing country	57.898	70.6905	66.4141	66.1342	73.7248
y2045	BTN	Developing country	0.450158	0.384313	0.376457	0.367096	0.420333
y2050	SEN	Developing country	22.1268	11.3767	11.6701	11.3142	15.3981
y2050	GMB	Developing country	0.0921236	0.0759508	0.0835383	0.0762688	0.0919372
y2050	MRT	Developing country	4.7872	4.31451	4.40353	4.31315	4.40289
y2050	ESH	Developing country	3.4e-14	3.4e-14	3.4e-14	3.1e-14	3.3e-14
y2050	GNB	Developing country	0.545677	0.449893	0.532572	0.451764	0.544573
y2050	GIN	Developing country	6.16244	5.46415	6.25582	5.48026	6.15132
y2050	SLE	Developing country	1.92298	1.89848	1.93771	1.90102	1.9202
y2050	MLI	Developing country	18.8347	9.18611	10.2247	9.14408	13.1251
y2050	LBR	Developing country	1.89497	1.8991	1.90444	1.90399	1.89183
y2050	CIV	Developing country	17.3671	17.0513	17.6106	17.0775	17.3412
y2050	BFA	Developing country	11.676	4.20576	4.80041	4.17611	7.34663
y2050	GHA	Developing country	11.7983	11.4022	11.7616	11.5074	11.7808
y2050	TGO	Developing country	3.50432	3.56334	3.5732	3.57064	3.57192
y2050	NER	Developing country	99.6974	70.5149	71.207	70.3389	80.8128
y2050	BEN	Developing country	3.04298	2.82625	2.65739	2.59393	3.18148
y2050	DZA	Developing country	2.94414	2.84817	2.91533	2.82428	2.85549
y2050	NGA	Developing country	91.3068	51.203	55.1124	51.8852	66.8298
y2050	CMR	Developing country	15.9653	13.1034	31.2922	22.8936	13.9348
y2050	GAB	Developing country	1.97891	1.9755	1.98031	1.97951	1.9739
y2050	GNQ	Developing country	0.539846	0.536419	0.543038	0.542146	0.537956
y2050	NAM	Developing country	2.34671	2.40351	2.33763	2.36378	2.24859
y2050	AGO	Developing country	6.02737	5.73926	6.13423	6.14096	5.9558
y2050	COG	Developing country	2.45936	2.45647	2.46197	2.46402	2.45372
y2050	COD	Developing country	26.3587	25.714	26.6162	26.6953	26.4222
y2050	LBY	Developing country	10.1453	10.209	10.1553	9.90058	10.2037
y2050	TCD	Developing country	11.6585	4.8612	22.22	15.635	7.15107
y2050	CAF	Developing country	4.41567	4.31195	7.73669	6.72204	4.30745
y2050	ZAF	Developing country	46.9317	45.3757	44.5758	44.7508	46.3089
y2050	BWA	Developing country	2.25428	2.24187	2.25399	2.25429	2.25395
y2050	ZMB	Developing country	2.35134	2.38653	2.40976	2.4168	2.38553
y2050	SDN	Developing country	40.9075	36.786	40.3781	28.9776	39.8597
y2050	ZWE	Developing country	7.35161	6.92312	7.95107	8.07651	6.75713
y2050	LSO	Developing country	0.989195	0.356291	1.10121	0.994324	0.98878
y2050	BDI	Developing country	0.981504	0.96863	0.975131	0.974618	0.975574
y2050	RWA	Developing country	0.464899	0.454947	0.459653	0.459315	0.460899
y2050	TZA	Developing country	9.06555	7.96465	8.89869	8.88398	8.93527
y2050	UGA	Developing country	4.87615	4.09293	4.83238	4.83117	4.84486
y2050	MOZ	Developing country	2.97942	3.07131	4.14017	4.15645	2.80324
y2050	SWZ	Developing country	0.107661	0.104917	0.0993833	0.0991239	0.107053
y2050	MWI	Developing country	0.399756	0.313075	0.32349	0.311158	0.342133
y2050	ETH	Developing country	15.8772	12.8274	15.3627	15.3743	15.5657
y2050	EGY	Developing country	46.9399	47.2664	46.9411	45.1244	47.3771
y2050	KEN	Developing country	17.7799	14.3254	17.6664	17.6699	17.6438
y2050	ERI	Developing country	3.8019	2.97555	3.65759	3.65104	3.70161
y2050	SOM	Developing country	23.9281	23.8883	23.9281	23.9281	23.9272
y2050	DJI	Developing country	0.00853468	0.00805858	0.0083234	0.00805961	0.00797054
y2050	MDG	Developing country	10.1494	10.0524	10.1683	9.73026	10.0801
y2050	MUS	Developing country	0	0	0	0	0
y2050	ATF	Developing country	0	0	0	0	0
y2050	CHN	Developing country	805.149	719.683	701.58	717.498	677.679
y2050	IND	Developing country	1138.49	1204.3	1197.77	1197.46	1097.95
y2050	NPL	Developing country	21.7255	26.5761	24.1474	25.0097	27.6619
y2050	MNG	Developing country	1.41823	1.3458	7.46654	1.40458	1.33252
y2050	MMR	Developing country	100.845	94.0293	99.3481	95.1228	85.4636
y2050	LAO	Developing country	57.3087	76.1425	67.3096	72.0174	77.6214
y2050	THA	Developing country	113.25	91.2238	93.6362	90.745	95.2853
y2050	KHM	Developing country	31.5338	28.6576	30.2516	29.0578	26.5206
y2050	VNM	Developing country	94.5431	119.921	107.671	112.539	124.701
y2050	RUS	Developing country	157.935	157.783	157.928	157.194	157.457
y2050	PRK	Developing country	11.3634	8.2144	8.5012	7.46484	9.34879
y2050	GRL	Developed income	1.06267	1.06267	1.06267	1.06267	1.06267
y2050	ISL	Developing country	0.85611	0.855988	0.856135	0.856134	0.855859
y2050	ESP	Developed income	28.6603	28.5797	29.1876	29.1871	28.5615
y2050	IRL	Developing country	0.776479	0.776109	0.776353	0.77637	0.772914
y2050	PRT	Developing country	3.79357	3.79051	3.79357	3.79357	3.78843
y2050	GBR	Developed income	4.94891	4.1509	4.94268	4.94368	4.13045
y2050	FRA	Developed income	23.9348	21.3725	31.1529	22.1376	21.338
y2050	BEL	Developed income	0.659441	0.6585	0.658292	0.658477	0.654267
y2050	NLD	Developing country	0.642894	0.642295	0.641909	0.642068	0.638841
y2050	NOR	Developing country	3.19795	3.19725	3.19806	3.19822	3.19521
y2050	LUX	Developing country	0.0317916	0.0317193	0.0317226	0.0317337	0.0314498
y2050	DEU	Developed income	8.43924	8.32933	9.22892	9.2308	8.28359
y2050	CHE	Developed income	0.350937	0.35049	0.350971	0.35124	0.348895
y2050	ITA	Developing country	24.5507	24.2683	26.1767	26.1751	24.2875
y2050	DNK	Developed income	1.39902	1.40172	1.39598	1.39647	1.39567
y2050	AUT	Developed income	1.98318	1.18319	2.7771	2.77648	1.17951
y2050	SWE	Developing country	2.43998	3.69182	2.43919	2.43931	3.68296
y2050	CZE	Developed income	2.28338	2.26296	2.43704	2.43762	2.25125
y2050	HRV	Developing country	1.72115	1.48537	3.39762	3.39605	1.48167
y2050	SVN	Developing country	0.29147	0.248825	0.590627	0.590347	0.247768
y2050	SJM	Developing country	0.0695282	0.0695282	0.0695282	0.0695282	0.0695282
y2050	POL	Developing country	9.7664	9.77972	9.7455	9.74887	9.73227
y2050	BIH	Developing country	0.945521	0.943703	0.945649	0.946789	0.937249
y2050	HUN	Developing country	6.50152	5.54623	13.3905	13.384	5.54629
y2050	SVK	Developing country	1.68821	1.28666	2.39021	2.38976	1.28184
y2050	MNE	Developing country	0.184192	0.183833	0.184217	0.184442	0.18253
y2050	SRB	Developing country	3.64146	3.6344	3.64196	3.64639	3.61523
y2050	ALB	Developing country	0.521311	0.520538	0.521368	0.521881	0.51799
y2050	GRC	Developed income	7.3098	7.3093	7.3098	7.3098	7.31116
y2050	MKD	Developing country	0.616565	0.615513	0.616638	0.617298	0.6121
y2050	ROU	Developed income	14.4028	12.8255	13.5587	14.5483	12.8253
y2050	LTU	Developing country	2.03705	2.03934	2.03263	2.03334	2.02889
y2050	LVA	Developing country	0.641519	0.639505	0.640161	0.64038	0.633613
y2050	FIN	Developed income	1.76805	2.56719	1.76798	1.76798	2.56066
y2050	EST	Developed income	0.644293	0.643532	0.643589	0.643701	0.639258
y2050	BGR	Developing country	6.40718	5.93237	9.82553	9.82235	5.93154
y2050	BLR	Developing country	2.76428	2.73655	2.76557	2.70712	2.73304
y2050	TUR	Developing country	17.7801	17.7752	17.7805	17.7835	17.7597
y2050	MDA	Developing country	0.974028	0.963435	0.975133	0.948578	0.961445
y2050	CYP	Developed income	0.123462	0.122869	0.123462	0.123462	0.122842
y2050	IRN	Developing country	33.075	33.0576	33.0647	33.0647	33.0615
y2050	UKR	Developing country	15.2634	15.0981	15.2799	14.8685	15.0673
y2050	GEO	Developing country	0.533883	0.529648	0.533909	0.525596	0.529155
y2050	ARM	Developing country	0.484622	0.498255	0.484715	0.485139	0.483185
y2050	AZE	Developing country	3.41216	3.61328	3.42018	3.42508	3.40668
y2050	KAZ	Developing country	21.5902	21.9272	21.5522	21.5586	21.5187
y2050	TKM	Developing country	8.44362	8.45519	8.46041	8.47112	8.4405
y2050	UZB	Developing country	18.3195	19.3651	18.3887	18.4333	18.3453
y2050	AFG	Developing country	9.39939	9.32446	9.07071	9.06292	9.34823
y2050	TJK	Developing country	3.49366	3.68706	3.50235	3.5063	3.4795
y2050	KGZ	Developing country	3.44817	3.62584	3.45591	3.46199	3.44392
y2050	MEX	Developing country	151.422	124.981	143.996	134.541	109.459
y2050	USA	Developed income	274.514	261.03	273.173	267.055	246.27
y2050	GTM	Developing country	7.61693	4.9229	7.20064	6.77719	4.62285
y2050	ECU	Developing country	12.9253	12.7098	12.8609	12.8592	10.162
y2050	SLV	Developing country	3.26225	2.00485	2.4588	1.81507	2.03089
y2050	HND	Developing country	6.9523	4.96473	6.60893	5.87806	4.8136
y2050	BLZ	Developing country	0.82101	0.172683	0.861068	0.89703	0.152439
y2050	NIC	Developing country	6.74913	5.48866	6.29564	5.75323	5.39983
y2050	CRI	Developing country	2.58241	2.2278	2.57803	2.60976	1.90325
y2050	CUB	Developing country	8.95569	9.86153	8.78646	8.6086	8.63463
y2050	PAN	Developing country	4.0258	4.00853	3.97805	4.01157	3.31999
y2050	PER	Developing country	25.163	22.2079	22.9226	22.8539	20.3598
y2050	COL	Developing country	40.3186	37.2015	39.8575	39.8173	31.144
y2050	BHS	Developed income	0.0627463	0.00410799	0.0664843	0.0698362	0.0036264
y2050	JAM	Developing country	0.357607	0.30099	0.359127	0.36063	0.280201
y2050	CHL	Developed income	29.048	27.7562	27.9969	28.0009	26.206
y2050	HTI	Developing country	2.58767	2.33908	2.2133	1.93107	2.17144
y2050	BRA	Developing country	266.042	197.353	241.725	226.829	174.817
y2050	ARG	Developing country	137.771	40.7977	91.6048	76.6044	34.501
y2050	VEN	Developing country	71.6501	43.7535	43.128	43.1313	46.4768
y2050	DOM	Developing country	4.19323	3.90379	4.09557	3.92233	3.43005
y2050	BOL	Developing country	9.77391	8.3294	9.044	8.92819	8.50572
y2050	PRY	Developing country	5.32186	4.42563	4.92291	4.78389	4.37802
y2050	TTO	Developing country	1.7386	1.55778	1.55783	1.55788	0.346933
y2050	FLK	Developing country	9e-15	8e-15	9e-15	9e-15	8e-15
y2050	GUY	Developing country	12.3926	11.5097	11.456	11.4253	7.69757
y2050	URY	Developed income	67.3122	8.17551	30.9017	31.3102	8.26347
y2050	SUR	Developing country	1.80534	2.21485	1.80525	1.80547	3.25731
y2050	GUF	Developing country	0.203918	0.644395	0.203896	0.204059	2.38085
y2050	SGS	Developing country	1e-15	1e-15	1e-15	1e-15	0
y2050	MAR	Developing country	36.9552	37.0549	37.012	36.947	36.9544
y2050	TUN	Developing country	4.95555	5.15194	4.94386	3.70528	5.25601
y2050	SAU	Developing country	6.22108	5.7527	5.9345	5.9344	5.82896
y2050	ISR	Developing country	0.552941	0.552941	0.552941	0.552941	0.552941
y2050	JOR	Developing country	0.288913	0.288913	0.288913	0.288913	0.288913
y2050	LBN	Developing country	0.927028	0.926984	0.927028	0.927028	0.927028
y2050	SYR	Developing country	3.01645	3.01652	3.01645	3.01645	3.01645
y2050	IRQ	Developing country	4.9023	4.90162	4.90212	4.90103	4.90212
y2050	YEM	Developing country	3.96577	3.84466	3.89166	3.89166	3.86799
y2050	KWT	Developing country	0.110047	0.110047	0.110047	0.110047	0.110047
y2050	QAT	Developing country	0.00316909	0.00316909	0.00316909	0.00316909	0.00316909
y2050	OMN	Developing country	0.176805	0.143695	0.156544	0.156543	0.151045
y2050	ARE	Developed income	0.0649052	0.0649052	0.0649052	0.0649052	0.0649052
y2050	PAK	Developing country	98.9619	95.7714	95.7228	95.201	97.2597
y2050	CAN	Developed income	63.5091	63.3875	63.542	63.5008	63.3532
y2050	PRI	Developing country	0.293046	0.223962	0.295551	0.297884	0.202505
y2050	AUS	Developed income	21.8397	20.921	36.3362	32.962	20.9123
y2050	JPN	Developing country	30.6788	31.318	32.6147	32.6281	32.6302
y2050	NZL	Developing country	11.7597	11.7296	11.7608	11.7594	11.7335
y2050	IDN	Developing country	105.14	105.521	105.002	105.409	105.798
y2050	MYS	Developing country	17.7843	17.6976	17.1538	17.7209	17.7486
y2050	SGP	Developing country	0.0520191	0.0517248	0.0492758	0.0518041	0.0518981
y2050	BRN	Developed income	0.0911712	0.0906554	0.117545	0.0907943	0.090959
y2050	PHL	Developing country	28.9004	26.7627	26.0174	26.5761	27.4245
y2050	TLS	Developing country	0.9698	0.982123	0.956112	0.975516	0.982123
y2050	KOR	Developing country	12.3858	8.92491	8.38428	7.93951	10.176
y2050	PNG	Developing country	5.46568	6.38941	7.16994	6.16038	6.53551
y2050	SLB	Developing country	0.0713479	0.0709443	0.172489	0.071053	0.0711819
y2050	NCL	Developing country	0.159296	0.179338	0.275606	0.185318	0.141331
y2050	VUT	Developing country	0.0418298	0.0415931	0.045857	0.0416568	0.0417325
y2050	FJI	Developing country	0.310053	0.307023	0.321193	0.308557	0.306944
y2050	REU	Developing country	0.00914581	0.00923611	0.00774077	0.00908435	0.00907807
y2050	LKA	Developing country	17.129	21.6158	19.6611	20.4977	22.2849
y2050	BGD	Developing country	58.5752	69.5978	65.6076	65.5963	72.7704
y2050	BTN	Developing country	0.444737	0.378134	0.370938	0.356961	0.400721
y2055	SEN	Developing country	22.8914	10.9786	25.8995	11.6946	16.295
y2055	GMB	Developing country	0.0895893	0.0767036	0.0839025	0.0925212	0.0923197
y2055	MRT	Developing country	4.77274	4.3177	4.86444	4.27914	4.38416
y2055	ESH	Developing country	3.5e-14	3.4e-14	3.4e-14	3.3e-14	3.4e-14
y2055	GNB	Developing country	0.544106	0.454746	0.535342	0.548507	0.547312
y2055	GIN	Developing country	6.36367	5.62698	6.40709	6.33895	6.31677
y2055	SLE	Developing country	2.05223	2.00683	2.04761	2.05381	2.04248
y2055	MLI	Developing country	19.7648	9.0567	22.4558	10.1982	14.0766
y2055	LBR	Developing country	2.00962	1.99534	2.00652	2.01871	2.0019
y2055	CIV	Developing country	18.4738	17.9401	18.5141	18.4517	18.3481
y2055	BFA	Developing country	12.4064	4.23541	14.2587	5.24041	8.20694
y2055	GHA	Developing country	12.4358	11.9659	12.3318	12.4851	12.4202
y2055	TGO	Developing country	3.6675	3.72337	3.73164	3.76391	3.74728
y2055	NER	Developing country	99.9895	67.8477	108.138	69.1153	81.4266
y2055	BEN	Developing country	3.1902	2.92257	3.07008	2.77486	3.31701
y2055	DZA	Developing country	2.95254	2.86017	2.93556	2.93425	2.85988
y2055	NGA	Developing country	98.4902	51.6201	113.887	57.0414	72.5262
y2055	CMR	Developing country	24.1402	13.141	34.2702	31.2583	14.3029
y2055	GAB	Developing country	1.93383	1.92949	1.93668	1.93581	1.92803
y2055	GNQ	Developing country	0.52654	0.523513	0.537007	0.536092	0.524365
y2055	NAM	Developing country	2.28201	2.31638	2.35908	2.41169	2.18377
y2055	AGO	Developing country	6.09938	5.81788	6.30511	5.9697	5.95899
y2055	COG	Developing country	2.41938	2.41298	2.42144	2.42501	2.41228
y2055	COD	Developing country	26.3891	25.5913	26.8496	26.8352	26.4072
y2055	LBY	Developing country	10.0081	10.0321	10.0128	9.82361	10.025
y2055	TCD	Developing country	19.7967	4.82429	30.627	24.6018	7.90306
y2055	CAF	Developing country	5.69447	4.11512	7.47865	8.36664	4.11035
y2055	ZAF	Developing country	43.4442	41.7447	43.3565	42.9178	43.4519
y2055	BWA	Developing country	2.19916	2.1865	2.21235	2.19916	2.19898
y2055	ZMB	Developing country	2.73876	2.76885	2.77172	2.77621	2.74801
y2055	SDN	Developing country	43.785	37.4146	40.6767	29.2288	40.0124
y2055	ZWE	Developing country	7.8488	7.49865	7.8594	7.98529	7.06731
y2055	LSO	Developing country	0.991641	0.343284	1.10967	0.99701	0.99115
y2055	BDI	Developing country	1.08784	1.0641	1.03703	1.03659	1.06369
y2055	RWA	Developing country	0.558821	0.540251	0.51754	0.517265	0.540153
y2055	TZA	Developing country	9.29151	8.14367	9.12022	9.09329	9.14827
y2055	UGA	Developing country	5.60592	4.73778	5.28089	5.28035	5.46028
y2055	MOZ	Developing country	4.34224	4.52914	4.38474	4.56479	3.82446
y2055	SWZ	Developing country	0.102621	0.099294	0.101726	0.100139	0.104306
y2055	MWI	Developing country	0.407484	0.322077	0.366899	0.349603	0.373128
y2055	ETH	Developing country	16.5291	13.3953	15.9645	16.0546	16.1842
y2055	EGY	Developing country	46.2243	46.2576	45.8006	44.8601	46.3514
y2055	KEN	Developing country	17.9567	14.4064	17.7429	17.7761	17.7903
y2055	ERI	Developing country	3.80029	2.94344	3.84124	3.64173	3.70158
y2055	SOM	Developing country	23.3471	23.306	23.347	23.347	23.346
y2055	DJI	Developing country	0.00810026	0.00780597	0.00809997	0.00763849	0.00753502
y2055	MDG	Developing country	9.81026	10.3097	9.93166	10.1543	10.1052
y2055	MUS	Developing country	0	0	0	0	0
y2055	ATF	Developing country	0	0	0	0	0
y2055	CHN	Developing country	789.322	680.184	702.889	691.204	673.193
y2055	IND	Developing country	1115.47	1162.2	1155.65	1158.16	1076.96
y2055	NPL	Developing country	21.8004	26.2417	24.3267	24.8685	27.5089
y2055	MNG	Developing country	1.42255	1.35552	7.38007	1.41236	1.34307
y2055	MMR	Developing country	102.18	93.3902	98.7197	97.8948	84.7621
y2055	LAO	Developing country	60.3943	75.4167	69.9845	72.05	76.9213
y2055	THA	Developing country	111.438	90.667	92.7262	93.2099	94.3018
y2055	KHM	Developing country	32.1033	28.4841	30.1178	29.9389	26.2394
y2055	VNM	Developing country	97.2791	118.657	109.629	112.201	123.848
y2055	RUS	Developing country	158.345	158.201	158.355	157.692	158.056
y2055	PRK	Developing country	7.16182	7.91299	7.40842	7.15268	9.86261
y2055	GRL	Developed income	1.06307	1.06307	1.06307	1.06307	1.06306
y2055	ISL	Developing country	0.857795	0.857662	0.857809	0.857809	0.857533
y2055	ESP	Developed income	27.9128	27.8228	28.4221	28.4217	27.8046
y2055	IRL	Developing country	0.794669	0.794289	0.794535	0.794544	0.791153
y2055	PRT	Developing country	3.66143	3.65846	3.66143	3.66143	3.65637
y2055	GBR	Developed income	4.97917	4.17801	4.97265	4.97317	4.15839
y2055	FRA	Developed income	23.7311	21.2004	30.6886	21.6751	21.1665
y2055	BEL	Developed income	0.659448	0.65845	0.658245	0.658342	0.654347
y2055	NLD	Developing country	0.641527	0.640881	0.640496	0.640579	0.637537
y2055	NOR	Developing country	3.20527	3.20506	3.20546	3.20555	3.20308
y2055	LUX	Developing country	0.0319329	0.0318569	0.0318605	0.0318663	0.0315948
y2055	DEU	Developed income	8.48351	8.3687	9.25534	9.25606	8.32476
y2055	CHE	Developed income	0.353413	0.353823	0.353648	0.353779	0.352328
y2055	ITA	Developing country	24.1012	23.822	25.7035	25.7022	23.8412
y2055	DNK	Developed income	1.4152	1.41779	1.412	1.41226	1.41205
y2055	AUT	Developed income	1.98608	1.18249	2.76482	2.76424	1.17888
y2055	SWE	Developing country	2.46963	3.72312	2.4688	2.46886	3.71448
y2055	CZE	Developed income	2.29299	2.27325	2.44479	2.44504	2.26206
y2055	HRV	Developing country	1.72808	1.47461	3.36008	3.35872	1.47084
y2055	SVN	Developing country	0.298926	0.247319	0.584474	0.584231	0.246225
y2055	SJM	Developing country	0.0692191	0.0692191	0.0692191	0.0692191	0.0692191
y2055	POL	Developing country	9.82362	9.83604	9.80171	9.80346	9.79096
y2055	BIH	Developing country	0.956016	0.957841	0.957008	0.957563	0.951811
y2055	HUN	Developing country	6.42664	5.50717	13.2414	13.2357	5.50731
y2055	SVK	Developing country	1.68784	1.28809	2.38162	2.38116	1.28343
y2055	MNE	Developing country	0.186263	0.186623	0.186459	0.186568	0.185403
y2055	SRB	Developing country	3.68126	3.68836	3.68512	3.68727	3.671
y2055	ALB	Developing country	0.524702	0.525569	0.525148	0.525398	0.523222
y2055	GRC	Developed income	7.15403	7.15357	7.15403	7.15403	7.15541
y2055	MKD	Developing country	0.620939	0.621996	0.621513	0.621835	0.618842
y2055	ROU	Developed income	14.2511	12.7189	13.2757	14.2666	12.7188
y2055	LTU	Developing country	2.0482	2.05028	2.04356	2.04393	2.04034
y2055	LVA	Developing country	0.645233	0.643144	0.64381	0.643924	0.637391
y2055	FIN	Developed income	1.79584	2.59694	1.79576	1.79576	2.59057
y2055	EST	Developed income	0.652448	0.651654	0.65171	0.651768	0.647477
y2055	BGR	Developing country	6.34019	5.86951	9.70716	9.70439	5.86869
y2055	BLR	Developing country	2.76301	2.7326	2.76425	2.70892	2.74432
y2055	TUR	Developing country	17.5786	17.5835	17.5813	17.5828	17.5691
y2055	MDA	Developing country	0.971491	0.959646	0.972574	0.946963	0.964593
y2055	CYP	Developed income	0.118777	0.118207	0.118777	0.118777	0.118177
y2055	IRN	Developing country	32.8168	32.8005	32.8079	32.8083	32.8091
y2055	UKR	Developing country	15.2233	15.0385	15.2395	14.8429	15.1153
y2055	GEO	Developing country	0.534805	0.530199	0.534836	0.526997	0.531895
y2055	ARM	Developing country	0.481631	0.496485	0.482352	0.483029	0.481665
y2055	AZE	Developing country	3.36832	3.58602	3.38515	3.39302	3.38328
y2055	KAZ	Developing country	21.3539	21.7235	21.3303	21.3456	21.3201
y2055	TKM	Developing country	8.29957	8.47093	8.32955	8.34416	8.29552
y2055	UZB	Developing country	18.0329	19.2856	18.1555	18.216	18.1544
y2055	AFG	Developing country	9.09948	9.29725	8.97495	8.98638	9.34001
y2055	TJK	Developing country	3.44609	3.66677	3.46482	3.47167	3.45239
y2055	KGZ	Developing country	3.41354	3.60609	3.42924	3.43774	3.42719
y2055	MEX	Developing country	150.159	120.993	141.43	133.359	116.345
y2055	USA	Developed income	272.298	260.431	270.369	267.006	243.148
y2055	GTM	Developing country	7.52316	4.75997	7.21603	6.86532	4.63386
y2055	ECU	Developing country	13.4171	12.9031	13.0572	13.0543	10.2843
y2055	SLV	Developing country	3.24195	2.00591	2.49196	1.9328	2.02411
y2055	HND	Developing country	6.88508	4.93159	6.69031	6.09981	4.85844
y2055	BLZ	Developing country	0.814006	0.160398	0.853674	0.889314	0.151678
y2055	NIC	Developing country	6.75161	5.45961	6.34754	5.99534	5.42669
y2055	CRI	Developing country	2.56142	2.13488	2.56102	2.60238	1.89656
y2055	CUB	Developing country	8.83516	9.20548	8.67069	8.50023	8.78836
y2055	PAN	Developing country	3.9968	3.84939	3.94829	4.00297	3.30277
y2055	PER	Developing country	25.4252	22.2239	22.9648	22.912	20.4655
y2055	COL	Developing country	40.3921	36.9426	40.4119	40.4794	31.4043
y2055	BHS	Developed income	0.0622189	0.00383157	0.0659214	0.0692436	0.00362327
y2055	JAM	Developing country	0.359426	0.290367	0.360923	0.362415	0.283814
y2055	CHL	Developed income	27.9351	26.5988	26.9151	26.9296	25.1645
y2055	HTI	Developing country	2.56592	2.22713	2.21341	1.96516	2.15795
y2055	BRA	Developing country	272.503	213.157	268.06	255.62	180.843
y2055	ARG	Developing country	159.801	54.4259	122.008	110.94	35.515
y2055	VEN	Developing country	71.4693	44.0336	43.3977	43.4061	46.9826
y2055	DOM	Developing country	4.12148	3.67852	4.03581	3.88254	3.55665
y2055	BOL	Developing country	10.6823	8.55178	9.26769	9.16845	8.74787
y2055	PRY	Developing country	5.52059	4.78405	5.43937	5.3398	4.64508
y2055	TTO	Developing country	1.75543	1.5771	1.57715	1.5772	0.350336
y2055	FLK	Developing country	8e-15	7e-15	8e-15	8e-15	7e-15
y2055	GUY	Developing country	12.5322	11.6561	11.6091	11.5778	7.83003
y2055	URY	Developed income	67.0602	16.832	30.2451	30.2776	8.4164
y2055	SUR	Developing country	1.83858	2.25729	1.83851	1.83875	3.3245
y2055	GUF	Developing country	0.207836	0.658187	0.207817	0.207996	2.42792
y2055	SGS	Developing country	1e-15	1e-15	1e-15	1e-15	0
y2055	MAR	Developing country	36.2682	36.3659	36.3237	36.2604	36.2674
y2055	TUN	Developing country	5.11671	5.11205	4.81115	4.1762	5.20353
y2055	SAU	Developing country	6.33733	5.92412	6.10297	6.11497	6.11753
y2055	ISR	Developing country	0.609881	0.609881	0.609881	0.609881	0.609881
y2055	JOR	Developing country	0.32117	0.32117	0.32117	0.32117	0.32117
y2055	LBN	Developing country	1.04348	1.04343	1.04348	1.04348	1.04348
y2055	SYR	Developing country	3.08711	3.08717	3.08711	3.08711	3.08711
y2055	IRQ	Developing country	4.92394	4.92325	4.92376	4.92272	4.92376
y2055	YEM	Developing country	4.28827	4.18134	4.22762	4.23074	4.23488
y2055	KWT	Developing country	0.122405	0.122405	0.122405	0.122405	0.122405
y2055	QAT	Developing country	0.00289365	0.00289365	0.00289365	0.00289365	0.00289365
y2055	OMN	Developing country	0.17189	0.142732	0.15535	0.156202	0.158301
y2055	ARE	Developed income	0.0704319	0.0704319	0.0704319	0.0704319	0.0704319
y2055	PAK	Developing country	97.0603	95.186	94.8131	94.8118	96.8135
y2055	CAN	Developed income	63.9032	63.9784	64.141	64.1054	63.9429
y2055	PRI	Developing country	0.295313	0.213577	0.297828	0.30018	0.205059
y2055	AUS	Developed income	21.8559	21.1049	35.5723	32.8811	21.0289
y2055	JPN	Developing country	30.5157	32.7474	33.2343	33.229	32.4857
y2055	NZL	Developing country	11.9227	11.9003	11.9312	11.9299	11.9042
y2055	IDN	Developing country	108.789	108.834	108.447	108.809	109.095
y2055	MYS	Developing country	17.9174	17.7896	17.2551	17.8247	17.8369
y2055	SGP	Developing country	0.052507	0.0520729	0.0496503	0.0521923	0.0522336
y2055	BRN	Developed income	0.0921858	0.0914237	0.118555	0.0916335	0.0917059
y2055	PHL	Developing country	28.8642	26.7227	25.978	26.904	27.3294
y2055	TLS	Developing country	1.05058	1.0639	1.03578	1.05676	1.0639
y2055	KOR	Developing country	7.76086	8.5982	7.21404	7.63368	10.7491
y2055	PNG	Developing country	5.60479	6.38281	7.3488	6.18261	6.53697
y2055	SLB	Developing country	0.0727636	0.0721621	0.174526	0.0723276	0.0723848
y2055	NCL	Developing country	0.172702	0.179151	0.277219	0.191283	0.140832
y2055	VUT	Developing country	0.0422836	0.0419341	0.0462642	0.0420303	0.0420635
y2055	FJI	Developing country	0.31367	0.309866	0.324882	0.311056	0.310162
y2055	REU	Developing country	0.00946845	0.00954546	0.00801057	0.0093991	0.00939009
y2055	LKA	Developing country	18.1548	21.5888	20.2009	20.6111	22.2459
y2055	BGD	Developing country	61.3378	68.8899	65.2805	65.5473	71.9871
y2055	BTN	Developing country	0.36093	0.37279	0.350913	0.352835	0.412149
y2060	SEN	Developing country	23.4497	10.5781	26.6374	21.7547	16.6719
y2060	GMB	Developing country	0.0899775	0.0781287	0.0848374	0.0935492	0.0933316
y2060	MRT	Developing country	4.74274	4.24606	4.84005	4.68142	4.53456
y2060	ESH	Developing country	3.5e-14	3.5e-14	3.4e-14	3.3e-14	3.4e-14
y2060	GNB	Developing country	0.549771	0.463597	0.541761	0.555083	0.553792
y2060	GIN	Developing country	6.64537	5.86611	6.62572	6.5564	6.53399
y2060	SLE	Developing country	2.69964	2.15526	2.19132	2.19726	2.18628
y2060	MLI	Developing country	20.5005	8.95396	23.3335	18.9677	14.655
y2060	LBR	Developing country	2.70603	2.12979	2.13919	2.14617	2.13237
y2060	CIV	Developing country	18.7392	19.1731	19.7073	19.6372	19.5386
y2060	BFA	Developing country	13.0866	4.31868	15.0637	12.0484	8.75806
y2060	GHA	Developing country	12.8145	12.7587	13.0907	13.2435	13.1807
y2060	TGO	Developing country	3.61051	3.93427	3.88248	3.95519	3.95264
y2060	NER	Developing country	99.5424	64.7665	108.173	94.8811	81.1804
y2060	BEN	Developing country	3.25916	3.04492	3.17299	3.13452	3.45485
y2060	DZA	Developing country	3.04141	2.93252	3.03665	2.98007	2.93811
y2060	NGA	Developing country	102.755	52.3882	118.316	99.6646	76.257
y2060	CMR	Developing country	33.0925	13.3103	34.3439	33.3927	14.6279
y2060	GAB	Developing country	1.89795	1.89299	1.90132	1.89821	1.89121
y2060	GNQ	Developing country	0.5326	0.513099	0.530591	0.520552	0.513564
y2060	NAM	Developing country	2.49275	2.24326	2.3044	2.35782	2.13822
y2060	AGO	Developing country	6.10494	5.89801	6.34703	6.0317	6.05637
y2060	COG	Developing country	2.67978	2.38467	2.3939	2.39472	2.38311
y2060	COD	Developing country	26.4831	25.4849	26.9554	26.7102	26.4275
y2060	LBY	Developing country	9.85074	9.86492	9.80963	9.62943	9.85202
y2060	TCD	Developing country	28.1791	4.83864	31.0465	30.5332	8.38945
y2060	CAF	Developing country	7.02847	3.9129	7.21494	8.08702	3.9082
y2060	ZAF	Developing country	43.2988	40.2758	41.8389	41.676	41.5875
y2060	BWA	Developing country	2.16405	2.15096	2.17613	2.16346	2.1632
y2060	ZMB	Developing country	3.29343	3.3257	3.33357	3.34018	3.30314
y2060	SDN	Developing country	44.048	37.1628	41.6449	30.2832	40.9622
y2060	ZWE	Developing country	8.42936	7.5281	7.86564	7.89608	7.22658
y2060	LSO	Developing country	1.00121	0.370166	1.12285	1.0067	1.00064
y2060	BDI	Developing country	1.14309	1.13467	1.09798	1.09791	1.13833
y2060	RWA	Developing country	0.60956	0.603542	0.573016	0.573054	0.606778
y2060	TZA	Developing country	9.5667	8.55633	9.50555	9.48434	9.53667
y2060	UGA	Developing country	6.00506	5.25353	5.71671	5.7188	5.98325
y2060	MOZ	Developing country	4.81033	5.13066	4.97923	5.01009	4.62983
y2060	SWZ	Developing country	0.10946	0.104405	0.106656	0.106109	0.108281
y2060	MWI	Developing country	0.501535	0.390095	0.425209	0.414315	0.445399
y2060	ETH	Developing country	16.9517	13.8831	16.3905	16.3895	16.6583
y2060	EGY	Developing country	45.0373	45.3313	44.6631	43.728	45.3786
y2060	KEN	Developing country	18.0418	14.5019	17.7407	17.7555	17.8134
y2060	ERI	Developing country	3.7783	2.92578	3.82169	3.75453	3.68433
y2060	SOM	Developing country	22.8094	22.7693	22.8093	22.8093	22.8081
y2060	DJI	Developing country	0.00769616	0.00738047	0.0076958	0.00766934	0.00769431
y2060	MDG	Developing country	10.0885	10.4924	10.2586	10.2983	10.4734
y2060	MUS	Developing country	0	0	0	0	0
y2060	ATF	Developing country	0	0	0	0	0
y2060	CHN	Developing country	765.51	668.963	689.339	665.332	647.974
y2060	IND	Developing country	1102.18	1128.87	1125.22	1127.82	1054.02
y2060	NPL	Developing country	21.9936	25.8632	24.1934	24.7122	27.1232
y2060	MNG	Developing country	1.42632	1.3705	7.32675	1.42582	1.35727
y2060	MMR	Developing country	104.333	86.3577	109.651	108.763	80.0203
y2060	LAO	Developing country	61.4924	74.173	70.2701	72.246	75.8739
y2060	THA	Developing country	107.727	84.1915	102.397	102.845	87.8618
y2060	KHM	Developing country	32.4588	26.281	33.5478	33.35	24.6427
y2060	VNM	Developing country	98.3391	117.211	108.989	111.447	122.322
y2060	RUS	Developing country	159.496	159.186	159.527	159.315	159.22
y2060	PRK	Developing country	7.04953	7.78726	7.27328	7.02488	9.72468
y2060	GRL	Developed income	1.06905	1.06905	1.06905	1.06905	1.06905
y2060	ISL	Developing country	0.86035	0.860206	0.860352	0.860352	0.860077
y2060	ESP	Developed income	27.2187	27.1058	27.6958	27.6953	27.0879
y2060	IRL	Developing country	0.817195	0.816838	0.81708	0.817086	0.816505
y2060	PRT	Developing country	3.5402	3.53731	3.5402	3.5402	3.53522
y2060	GBR	Developed income	5.02355	4.2229	5.01775	5.01815	4.20701
y2060	FRA	Developed income	23.5375	21.0449	30.2111	21.1974	21.0111
y2060	BEL	Developed income	0.661026	0.660263	0.659956	0.660029	0.656117
y2060	NLD	Developing country	0.641347	0.640903	0.640429	0.640491	0.637494
y2060	NOR	Developing country	3.21621	3.21563	3.21639	3.21648	3.21419
y2060	LUX	Developing country	0.0321716	0.0321095	0.0321072	0.0321116	0.0318423
y2060	DEU	Developed income	8.55956	8.43696	9.30774	9.30812	8.39242
y2060	CHE	Developed income	0.356806	0.356684	0.357076	0.357232	0.35608
y2060	ITA	Developing country	23.6454	23.3696	25.2213	25.2199	23.3889
y2060	DNK	Developed income	1.43584	1.43911	1.43296	1.43316	1.43315
y2060	AUT	Developed income	1.99414	1.18399	2.75154	2.75094	1.18064
y2060	SWE	Developing country	2.51035	3.76247	2.50961	2.50966	3.75966
y2060	CZE	Developed income	2.30856	2.29153	2.45981	2.45997	2.28018
y2060	HRV	Developing country	1.76262	1.46479	3.32062	3.31925	1.46092
y2060	SVN	Developing country	0.31898	0.246019	0.578018	0.577773	0.24489
y2060	SJM	Developing country	0.0693533	0.0693533	0.0693533	0.0693533	0.0693533
y2060	POL	Developing country	9.91157	9.92849	9.89202	9.89335	9.88267
y2060	BIH	Developing country	0.969896	0.969467	0.971042	0.971703	0.967225
y2060	HUN	Developing country	6.32197	5.47183	13.0842	13.0785	5.47205
y2060	SVK	Developing country	1.68724	1.29275	2.37413	2.37364	1.28829
y2060	MNE	Developing country	0.188999	0.188915	0.189225	0.189356	0.188441
y2060	SRB	Developing country	3.73413	3.73247	3.73859	3.74116	3.73
y2060	ALB	Developing country	0.529714	0.529567	0.530229	0.530527	0.528935
y2060	GRC	Developed income	6.99945	6.99903	6.99945	6.99945	7.00087
y2060	MKD	Developing country	0.627343	0.627096	0.628006	0.628389	0.626146
y2060	ROU	Developed income	14.0663	12.6174	12.9783	13.9692	12.6181
y2060	LTU	Developing country	2.06556	2.0686	2.06143	2.06171	2.05838
y2060	LVA	Developing country	0.651007	0.649182	0.649738	0.649825	0.643384
y2060	FIN	Developed income	1.83532	2.6364	1.83526	1.83526	2.63632
y2060	EST	Developed income	0.664046	0.663399	0.663389	0.663434	0.660415
y2060	BGR	Developing country	6.27468	5.80672	9.58301	9.58023	5.80628
y2060	BLR	Developing country	2.79934	2.76361	2.8006	2.78261	2.78155
y2060	TUR	Developing country	17.4024	17.4012	17.4054	17.4072	17.397
y2060	MDA	Developing country	0.982432	0.970476	0.983519	0.974953	0.976442
y2060	CYP	Developed income	0.114551	0.114	0.114551	0.114551	0.113968
y2060	IRN	Developing country	32.6566	32.6413	32.6537	32.6537	32.6539
y2060	UKR	Developing country	15.394	15.2068	15.4102	15.2779	15.2999
y2060	GEO	Developing country	0.541522	0.536031	0.541566	0.539093	0.538722
y2060	ARM	Developing country	0.480293	0.496091	0.481782	0.48228	0.481448
y2060	AZE	Developing country	3.33935	3.57202	3.36696	3.37316	3.37006
y2060	KAZ	Developing country	21.2094	21.5953	21.2019	21.2153	21.2023
y2060	TKM	Developing country	8.17238	8.43245	8.21864	8.22886	8.22251
y2060	UZB	Developing country	17.8057	19.2064	17.9944	18.0371	18.0473
y2060	AFG	Developing country	9.00959	9.39998	9.01012	9.03448	9.44239
y2060	TJK	Developing country	3.41031	3.65309	3.44137	3.44493	3.43639
y2060	KGZ	Developing country	3.3917	3.59825	3.41703	3.423	3.41945
y2060	MEX	Developing country	147.684	120.206	137.854	132.993	115.394
y2060	USA	Developed income	272.769	260.559	269.508	266.688	238.086
y2060	GTM	Developing country	7.51763	5.04877	7.16738	6.81373	4.71843
y2060	ECU	Developing country	13.5757	13.1113	13.2262	13.2228	10.3702
y2060	SLV	Developing country	3.23192	2.04159	2.42701	2.11244	2.03268
y2060	HND	Developing country	6.91273	5.1221	6.6494	6.28496	4.92959
y2060	BLZ	Developing country	0.809538	0.175669	0.848936	0.846448	0.155205
y2060	NIC	Developing country	6.7436	5.51986	6.29121	6.12548	5.41081
y2060	CRI	Developing country	2.54203	2.16548	2.54143	2.54363	1.89389
y2060	CUB	Developing country	8.73826	9.86969	8.57013	8.12226	8.88958
y2060	PAN	Developing country	3.95614	3.82208	3.90749	3.9524	3.26961
y2060	PER	Developing country	25.3796	22.3878	22.972	22.9395	21.225
y2060	COL	Developing country	40.5192	37.1073	40.5087	40.4782	31.4561
y2060	BHS	Developed income	0.0618859	0.00421822	0.065564	0.065914	0.00372683
y2060	JAM	Developing country	0.36133	0.311271	0.36281	0.353207	0.2874
y2060	CHL	Developed income	26.7662	25.5129	25.7805	25.789	24.1059
y2060	HTI	Developing country	2.55218	2.37064	2.17849	1.97624	2.18776
y2060	BRA	Developing country	279.701	218.437	273.445	259.941	184.722
y2060	ARG	Developing country	161.532	55.1806	122.037	110.591	36.2316
y2060	VEN	Developing country	71.2461	44.1925	44.9141	66.1732	47.1712
y2060	DOM	Developing country	4.06131	3.85559	3.96257	3.7639	3.56121
y2060	BOL	Developing country	10.8879	8.81745	9.48584	9.42817	8.88938
y2060	PRY	Developing country	5.78865	5.0318	5.67528	5.57021	4.76866
y2060	TTO	Developing country	1.76801	1.59191	1.6007	1.73545	0.35262
y2060	FLK	Developing country	8e-15	7e-15	8e-15	8e-15	7e-15
y2060	GUY	Developing country	12.6261	11.8217	11.837	12.4103	7.93537
y2060	URY	Developed income	68.7603	16.8245	30.0571	29.7665	8.52635
y2060	SUR	Developing country	1.8651	2.29091	1.86504	1.86526	3.37609
y2060	GUF	Developing country	0.211019	0.669092	0.211	0.211178	2.46523
y2060	SGS	Developing country	1e-15	1e-15	1e-15	1e-15	1e-15
y2060	MAR	Developing country	35.6666	35.7625	35.721	35.659	35.6659
y2060	TUN	Developing country	4.92616	5.10225	4.65515	4.02377	5.16043
y2060	SAU	Developing country	6.47002	6.10051	6.39629	6.39625	6.38456
y2060	ISR	Developing country	0.679862	0.679862	0.679862	0.679862	0.679862
y2060	JOR	Developing country	0.360915	0.360915	0.360915	0.360915	0.360915
y2060	LBN	Developing country	1.1665	1.16646	1.1665	1.1665	1.1665
y2060	SYR	Developing country	3.24715	3.24722	3.24715	3.24715	3.24715
y2060	IRQ	Developing country	4.9907	4.98999	4.99052	4.98952	4.99052
y2060	YEM	Developing country	4.59139	4.49568	4.57225	4.57227	4.5726
y2060	KWT	Developing country	0.136101	0.136101	0.136101	0.136101	0.136101
y2060	QAT	Developing country	0.00309149	0.00309149	0.00309149	0.00309149	0.00309149
y2060	OMN	Developing country	0.168003	0.141974	0.162799	0.162802	0.163865
y2060	ARE	Developed income	0.0761228	0.0761228	0.0761228	0.0761228	0.0761228
y2060	PAK	Developing country	96.6776	94.9735	95.984	96.0507	96.535
y2060	CAN	Developed income	64.7059	64.7737	64.941	64.9101	64.7406
y2060	PRI	Developing country	0.29814	0.233741	0.300672	0.291593	0.210714
y2060	AUS	Developed income	21.9809	21.9959	35.3837	32.2894	21.1966
y2060	JPN	Developing country	30.4839	34.1272	33.6124	33.9188	33.1629
y2060	NZL	Developing country	12.1229	12.1007	12.1312	12.1301	12.1047
y2060	IDN	Developing country	112.627	111.437	110.659	111.019	111.682
y2060	MYS	Developing country	18.3021	17.8564	17.1623	17.7296	17.8871
y2060	SGP	Developing country	0.0538807	0.0523654	0.0494029	0.0519345	0.0524697
y2060	BRN	Developed income	0.0947581	0.0920932	0.118078	0.0913354	0.0922767
y2060	PHL	Developing country	28.7571	26.0002	26.9267	27.8422	26.5802
y2060	TLS	Developing country	1.11362	1.19521	1.10023	1.12245	1.13002
y2060	KOR	Developing country	7.64097	8.46447	7.08434	7.50506	10.6036
y2060	PNG	Developing country	5.6941	6.39819	7.32553	6.1613	6.51558
y2060	SLB	Developing country	0.0754239	0.0733027	0.174368	0.0726995	0.0734488
y2060	NCL	Developing country	0.188329	0.167516	0.29722	0.211571	0.137022
y2060	VUT	Developing country	0.0434532	0.0422312	0.0460923	0.0418837	0.0423153
y2060	FJI	Developing country	0.321154	0.312824	0.324982	0.310873	0.312864
y2060	REU	Developing country	0.00958367	0.00964716	0.0081048	0.00950764	0.00949465
y2060	LKA	Developing country	18.4985	21.5195	20.2054	20.5971	22.1598
y2060	BGD	Developing country	61.4427	67.7299	65.3345	65.5573	70.6765
y2060	BTN	Developing country	0.362217	0.371217	0.344721	0.349687	0.410081
y2070	SEN	Developing country	25.1391	9.72672	26.5203	25.2228	15.8171
y2070	GMB	Developing country	0.0856093	0.0803192	0.0857176	0.07246	0.094281
y2070	MRT	Developing country	5.3802	4.30277	4.74191	4.69724	4.40079
y2070	ESH	Developing country	3.6e-14	3.5e-14	3.6e-14	3.5e-14	3.4e-14
y2070	GNB	Developing country	0.548426	0.477394	0.548273	0.444737	0.560364
y2070	GIN	Developing country	7.3322	6.47594	7.16883	6.2858	7.07856
y2070	SLE	Developing country	3.83206	2.58448	2.60551	2.5648	2.60288
y2070	MLI	Developing country	39.7724	8.70314	23.7403	21.8381	14.397
y2070	LBR	Developing country	3.89839	2.54023	2.53506	2.53209	2.53295
y2070	CIV	Developing country	21.053	22.7593	23.1573	22.6069	23.0093
y2070	BFA	Developing country	25.3898	4.48145	15.6695	14.2802	8.88576
y2070	GHA	Developing country	14.4714	15.102	15.2757	14.9257	15.3799
y2070	TGO	Developing country	3.96178	4.58437	4.47447	4.40818	4.50891
y2070	NER	Developing country	86.2545	57.9742	103.67	100.639	74.6338
y2070	BEN	Developing country	3.6715	3.24515	3.66191	3.45304	3.88721
y2070	DZA	Developing country	3.10936	3.01038	3.0738	3.07283	3.01007
y2070	NGA	Developing country	94.2788	52.438	123.202	117.273	79.3811
y2070	CMR	Developing country	33.4741	14.1194	34.598	34.454	15.4062
y2070	GAB	Developing country	1.96718	1.96235	1.96895	1.96711	1.95928
y2070	GNQ	Developing country	0.569303	0.528259	0.541764	0.537256	0.528827
y2070	NAM	Developing country	2.36899	2.34215	2.35235	2.36289	2.08298
y2070	AGO	Developing country	6.6315	6.51306	6.85357	6.57598	6.53619
y2070	COG	Developing country	3.19981	2.4995	2.50506	2.50536	2.4952
y2070	COD	Developing country	27.7031	26.8803	28.2834	28.1186	27.6407
y2070	LBY	Developing country	9.38444	9.37508	9.31888	9.29918	9.35715
y2070	TCD	Developing country	49.67	4.90776	31.001	32.6868	8.48999
y2070	CAF	Developing country	6.56693	3.57556	6.75464	7.59813	3.5674
y2070	ZAF	Developing country	41.2368	40.2699	40.8565	40.5301	39.2303
y2070	BWA	Developing country	2.12794	2.12308	2.13938	2.12708	2.12669
y2070	ZMB	Developing country	4.59331	4.6086	4.61198	4.61574	4.49879
y2070	SDN	Developing country	44.4167	38.9871	42.5641	41.4309	40.8903
y2070	ZWE	Developing country	8.35101	8.61102	8.48822	8.56752	7.43838
y2070	LSO	Developing country	1.02185	0.83638	1.15156	1.02778	1.02114
y2070	BDI	Developing country	1.27601	1.27641	1.27714	1.27631	1.27437
y2070	RWA	Developing country	0.705257	0.706416	0.706416	0.705836	0.705257
y2070	TZA	Developing country	10.7371	10.5607	10.7289	10.7026	10.174
y2070	UGA	Developing country	6.75589	6.59794	6.76047	6.75817	6.75573
y2070	MOZ	Developing country	5.80678	6.26115	6.04485	6.16446	5.91698
y2070	SWZ	Developing country	0.125334	0.122055	0.123625	0.122726	0.124609
y2070	MWI	Developing country	0.590271	0.557361	0.564608	0.561945	0.62686
y2070	ETH	Developing country	17.6787	16.4742	17.3337	17.1364	17.5959
y2070	EGY	Developing country	43.4041	43.4057	42.8504	42.7811	43.4004
y2070	KEN	Developing country	17.8957	18.8845	17.7504	17.7559	17.7133
y2070	ERI	Developing country	4.08781	3.81808	3.74233	3.72677	3.5935
y2070	SOM	Developing country	21.9437	22.3582	21.9434	21.9434	21.9421
y2070	DJI	Developing country	0.00715181	0.00670787	0.00718078	0.00715117	0.00714793
y2070	MDG	Developing country	11.132	11.1383	11.2408	11.1706	11.0912
y2070	MUS	Developing country	0	0	0	0	0
y2070	ATF	Developing country	0	0	0	0	0
y2070	CHN	Developing country	710.159	555.668	587.685	586.4	567.02
y2070	IND	Developing country	1083.4	1074.42	1078.18	1080.89	1028.02
y2070	NPL	Developing country	22.9891	25.289	24.0325	24.1364	25.8077
y2070	MNG	Developing country	1.59796	1.38645	7.13366	1.44164	1.37021
y2070	MMR	Developing country	98.612	85.7204	108.849	108.119	77.034
y2070	LAO	Developing country	64.3127	72.6719	70.8679	70.8819	72.1357
y2070	THA	Developing country	102.457	83.5563	101.644	102.09	84.4018
y2070	KHM	Developing country	30.6295	26.0972	33.2952	33.1279	23.6973
y2070	VNM	Developing country	103.603	114.782	108.87	109.257	116.413
y2070	RUS	Developing country	163.228	163.024	163.201	163.237	163.025
y2070	PRK	Developing country	6.93564	7.64756	7.08543	6.8297	9.57705
y2070	GRL	Developed income	1.08909	1.08908	1.08909	1.08909	1.08908
y2070	ISL	Developing country	0.864684	0.864537	0.864681	0.864681	0.86441
y2070	ESP	Developed income	25.8521	25.5039	26.2282	26.0662	25.4848
y2070	IRL	Developing country	0.877776	0.874248	0.874521	0.874783	0.873855
y2070	PRT	Developing country	3.28886	3.28616	3.28886	3.28886	3.28415
y2070	GBR	Developed income	5.17096	4.36362	5.16718	5.16609	4.34445
y2070	FRA	Developed income	23.1117	20.726	29.0002	20.9816	20.6402
y2070	BEL	Developed income	0.667889	0.668191	0.668027	0.667749	0.663418
y2070	NLD	Developing country	0.643594	0.644103	0.643746	0.643505	0.640154
y2070	NOR	Developing country	3.4075	3.45687	3.30574	3.3399	3.48201
y2070	LUX	Developing country	0.0329136	0.0329174	0.0329243	0.0329073	0.0326107
y2070	DEU	Developed income	8.87223	8.64184	9.56183	9.47053	8.58593
y2070	CHE	Developed income	0.639654	0.719594	0.476577	0.531321	0.763382
y2070	ITA	Developing country	22.6486	22.3711	24.1508	24.1422	22.3849
y2070	DNK	Developed income	1.46814	1.47451	1.46862	1.46786	1.46692
y2070	AUT	Developed income	2.09341	1.1922	2.78673	2.72502	1.18612
y2070	SWE	Developing country	2.64189	3.8983	2.6352	2.63562	3.89507
y2070	CZE	Developed income	2.34518	2.3476	2.49871	2.50704	2.33332
y2070	HRV	Developing country	2.20559	1.44342	3.53595	3.21345	1.43467
y2070	SVN	Developing country	0.532467	0.243264	0.707986	0.560176	0.241227
y2070	SJM	Developing country	0.0701164	0.0701164	0.0701164	0.0701164	0.0701164
y2070	POL	Developing country	10.1661	10.2034	10.1687	10.1636	10.1463
y2070	BIH	Developing country	2.17337	2.51388	1.47892	1.71204	2.70111
y2070	HUN	Developing country	5.65101	5.39388	12.2837	12.6516	5.37455
y2070	SVK	Developing country	1.66392	1.3082	2.33235	2.35641	1.30097
y2070	MNE	Developing country	0.426434	0.493617	0.289421	0.335415	0.530467
y2070	SRB	Developing country	8.41127	9.73454	5.71258	6.61851	10.4797
y2070	ALB	Developing country	1.06809	1.22139	0.755531	0.860455	1.30672
y2070	GRC	Developed income	6.64735	6.64701	6.64735	6.64735	6.64877
y2070	MKD	Developing country	1.32035	1.51749	0.918298	1.05326	1.627
y2070	ROU	Developed income	13.1701	12.395	12.7846	13.1874	12.3633
y2070	LTU	Developing country	2.11498	2.12243	2.11566	2.11457	2.10981
y2070	LVA	Developing country	0.668018	0.667399	0.668154	0.667826	0.6608
y2070	FIN	Developed income	1.95697	2.75888	1.94974	1.95037	2.75879
y2070	EST	Developed income	0.698084	0.696675	0.696744	0.6967	0.693283
y2070	BGR	Developing country	6.15689	5.66676	9.29801	9.2665	5.65631
y2070	BLR	Developing country	2.93443	2.90997	2.93579	2.93579	2.92082
y2070	TUR	Developing country	20.0538	20.9649	18.1957	18.8195	21.4708
y2070	MDA	Developing country	1.02436	1.01514	1.02548	1.02538	1.02021
y2070	CYP	Developed income	0.104991	0.104487	0.104991	0.104991	0.104458
y2070	IRN	Developing country	32.1133	32.0977	32.1446	32.1112	32.1131
y2070	UKR	Developing country	16.0516	15.9076	16.0684	16.0674	15.9862
y2070	GEO	Developing country	0.564399	0.56067	0.564467	0.564566	0.562211
y2070	ARM	Developing country	0.481254	0.488776	0.479657	0.48225	0.483018
y2070	AZE	Developing country	3.31169	3.42981	3.29751	3.33286	3.35064
y2070	KAZ	Developing country	21.1697	21.3368	21.0765	21.146	21.177
y2070	TKM	Developing country	7.97535	8.13049	7.96049	8.0128	8.03753
y2070	UZB	Developing country	17.4767	18.2367	17.417	17.6307	17.7668
y2070	AFG	Developing country	9.843	10.3881	9.83835	9.85726	10.4308
y2070	TJK	Developing country	3.35749	3.47731	3.34268	3.37795	3.3928
y2070	KGZ	Developing country	3.37306	3.4775	3.36143	3.3928	3.40805
y2070	MEX	Developing country	162.021	124.313	132.214	143.336	133.408
y2070	USA	Developed income	273.697	261.001	265.921	266.572	238.233
y2070	GTM	Developing country	8.64142	4.99126	7.0181	7.63336	4.6658
y2070	ECU	Developing country	13.7811	13.274	13.4447	13.4546	10.6036
y2070	SLV	Developing country	4.80034	2.10479	2.27153	2.92367	2.00295
y2070	HND	Developing country	8.36855	5.13146	6.46761	7.3554	4.89702
y2070	BLZ	Developing country	0.804682	0.16904	0.840026	0.880085	0.152129
y2070	NIC	Developing country	7.44402	5.45172	6.05844	6.73534	5.25619
y2070	CRI	Developing country	2.46264	2.10084	2.48781	2.53324	1.8443
y2070	CUB	Developing country	8.7075	9.45722	8.39888	8.36047	8.64336
y2070	PAN	Developing country	3.78125	3.70779	3.79601	3.85031	3.16751
y2070	PER	Developing country	25.1336	22.2666	22.8813	22.9935	21.523
y2070	COL	Developing country	40.1407	36.7826	40.2456	40.3321	31.1721
y2070	BHS	Developed income	0.0615269	0.00408005	0.0648883	0.0685461	0.00367188
y2070	JAM	Developing country	0.363804	0.307186	0.364129	0.367073	0.287693
y2070	CHL	Developed income	24.359	23.246	23.4543	23.4765	21.9052
y2070	HTI	Developing country	3.17254	2.33236	2.10099	2.33884	2.14327
y2070	BRA	Developing country	283.919	226.606	279.139	266.514	188.692
y2070	ARG	Developing country	163.798	55.852	119.738	108.82	40.8158
y2070	VEN	Developing country	70.5314	43.9649	45.3324	70.4196	47.0388
y2070	DOM	Developing country	4.28738	3.70198	3.83435	3.9772	3.44267
y2070	BOL	Developing country	11.493	9.28248	9.88137	10.0297	9.39157
y2070	PRY	Developing country	6.31181	5.44774	6.10502	6.00917	5.19964
y2070	TTO	Developing country	1.77398	1.60154	1.61436	1.77351	0.352793
y2070	FLK	Developing country	8e-15	7e-15	8e-15	8e-15	8e-15
y2070	GUY	Developing country	12.6416	11.9387	11.9426	12.6312	8.02705
y2070	URY	Developed income	73.4917	17.0724	30.057	28.2493	8.63417
y2070	SUR	Developing country	1.8897	2.32263	1.88978	1.89003	3.42955
y2070	GUF	Developing country	0.213959	0.67982	0.214054	0.214239	2.50257
y2070	SGS	Developing country	1e-15	1e-15	1e-15	1e-15	1e-15
y2070	MAR	Developing country	34.3013	34.393	34.3532	34.2942	34.3
y2070	TUN	Developing country	5.02459	5.00123	4.63022	4.59453	5.02415
y2070	SAU	Developing country	6.55376	6.20335	7.28559	6.50589	6.49821
y2070	ISR	Developing country	0.83277	0.83277	0.83277	0.83277	0.83277
y2070	JOR	Developing country	0.446656	0.446656	0.446656	0.446656	0.446656
y2070	LBN	Developing country	1.29774	1.2977	1.29774	1.29774	1.29774
y2070	SYR	Developing country	3.66881	3.66894	3.66881	3.66881	3.66879
y2070	IRQ	Developing country	5.08467	5.08396	5.08451	5.08356	5.0842
y2070	YEM	Developing country	4.71019	4.61954	4.89927	4.69779	4.69897
y2070	KWT	Developing country	0.156939	0.156939	0.156939	0.156939	0.156939
y2070	QAT	Developing country	0.00338395	0.00338395	0.00338395	0.00338395	0.00338395
y2070	OMN	Developing country	0.165123	0.14042	0.21665	0.161743	0.163034
y2070	ARE	Developed income	0.0816823	0.0816823	0.0816823	0.0816823	0.0816823
y2070	PAK	Developing country	97.5607	96.234	96.9405	96.949	97.542
y2070	CAN	Developed income	66.8618	66.9218	67.1017	67.0183	66.8897
y2070	PRI	Developing country	0.306027	0.233053	0.307434	0.311441	0.213667
y2070	AUS	Developed income	22.2097	22.2021	35.0948	32.2291	21.4807
y2070	JPN	Developing country	30.6052	34.8349	34.5647	34.5071	34.1352
y2070	NZL	Developing country	12.5757	12.5537	12.5842	12.5813	12.558
y2070	IDN	Developing country	120.569	111.862	111.182	111.068	114.048
y2070	MYS	Developing country	20.0843	18.0894	17.3755	17.9583	18.1357
y2070	SGP	Developing country	0.060236	0.0534445	0.0504002	0.0529983	0.0536023
y2070	BRN	Developed income	0.106176	0.0942044	0.120618	0.093418	0.0944825
y2070	PHL	Developing country	29.9216	26.0981	27.0045	27.9187	26.2997
y2070	TLS	Developing country	1.14819	1.16999	1.07984	1.08854	1.16504
y2070	KOR	Developing country	7.51722	8.32077	6.97208	7.40553	10.4548
y2070	PNG	Developing country	6.04534	6.34295	7.41111	6.11526	6.36036
y2070	SLB	Developing country	0.0854772	0.0758397	0.17891	0.0752066	0.0760636
y2070	NCL	Developing country	0.182901	0.167919	0.298457	0.211761	0.134485
y2070	VUT	Developing country	0.0486813	0.0431925	0.0471105	0.0428319	0.04332
y2070	FJI	Developing country	0.351919	0.318846	0.33167	0.316684	0.31961
y2070	REU	Developing country	0.00997541	0.0100354	0.00844729	0.00990666	0.00986757
y2070	LKA	Developing country	19.5928	21.1657	20.205	20.2553	21.3372
y2070	BGD	Developing country	64.206	66.2793	64.1827	64.2024	67.0777
y2070	BTN	Developing country	0.370815	0.370659	0.344165	0.353549	0.409778
y2080	SEN	Developing country	22.6122	8.92994	23.8577	23.7976	14.9892
y2080	GMB	Developing country	0.0836507	0.0789418	0.083321	0.0797448	0.0920699
y2080	MRT	Developing country	5.13763	4.16141	4.55191	4.78404	4.27462
y2080	ESH	Developing country	3.4e-14	3.3e-14	3.5e-14	3.3e-14	3.3e-14
y2080	GNB	Developing country	0.536723	0.469967	0.535836	0.492991	0.548107
y2080	GIN	Developing country	8.05355	7.0215	7.73273	7.27469	7.59916
y2080	SLE	Developing country	6.06488	3.08638	3.43504	3.09567	3.11165
y2080	MLI	Developing country	36.3022	8.33753	21.8115	21.3305	13.996
y2080	LBR	Developing country	6.31729	3.02975	3.38589	3.02892	3.02939
y2080	CIV	Developing country	22.0851	26.9133	26.8018	27.0834	27.2159
y2080	BFA	Developing country	23.2278	4.49509	14.4509	14.1898	8.85149
y2080	GHA	Developing country	15.8554	17.7303	17.6896	17.7808	18.0138
y2080	TGO	Developing country	3.88162	5.36227	5.07124	5.21901	5.23811
y2080	NER	Developing country	76.9318	52.0388	92.6356	92.6356	68.6298
y2080	BEN	Developing country	3.63093	3.47892	3.99393	4.02322	4.34146
y2080	DZA	Developing country	3.13286	3.04021	3.10414	3.09965	3.04341
y2080	NGA	Developing country	92.7401	56.7289	119.653	119.818	81.3935
y2080	CMR	Developing country	36.4458	15.2065	34.9379	34.4002	16.5019
y2080	GAB	Developing country	2.06444	2.05942	2.06418	2.06305	2.05517
y2080	GNQ	Developing country	0.644087	0.547695	0.563651	0.552298	0.545989
y2080	NAM	Developing country	2.26871	2.25072	2.3648	2.26945	2.14644
y2080	AGO	Developing country	7.33969	7.01807	7.37774	7.06987	6.99538
y2080	COG	Developing country	4.34994	2.65963	2.84693	2.66541	2.65517
y2080	COD	Developing country	29.9722	28.6753	29.9399	29.7841	29.0714
y2080	LBY	Developing country	8.95497	8.95745	8.96617	8.91186	8.93777
y2080	TCD	Developing country	54.0533	4.93676	31.8012	31.2758	8.5272
y2080	CAF	Developing country	8.81338	3.34087	7.26375	7.13593	3.3301
y2080	ZAF	Developing country	39.1999	38.36	38.7535	38.3835	38.1933
y2080	BWA	Developing country	2.10285	2.10098	2.11391	2.10214	2.10144
y2080	ZMB	Developing country	5.86106	5.87998	5.89042	5.89221	5.58916
y2080	SDN	Developing country	45.5227	40.0631	43.3107	42.5808	40.8039
y2080	ZWE	Developing country	8.27453	8.56138	8.42295	8.5434	8.17495
y2080	LSO	Developing country	1.02232	1.00152	1.16053	1.02842	1.0213
y2080	BDI	Developing country	1.35422	1.45137	1.38108	1.45115	1.44896
y2080	RWA	Developing country	0.745054	0.830624	0.768666	0.829942	0.829259
y2080	TZA	Developing country	12.1231	12.1516	12.0373	12.2166	10.3954
y2080	UGA	Developing country	7.37379	7.73264	7.4679	7.75311	7.70826
y2080	MOZ	Developing country	6.7571	7.22962	7.01555	7.20235	7.04266
y2080	SWZ	Developing country	0.142844	0.139371	0.140904	0.139567	0.141765
y2080	MWI	Developing country	0.751629	0.71271	0.719959	0.714794	0.800483
y2080	ETH	Developing country	18.5903	18.2554	18.2724	18.4262	18.5867
y2080	EGY	Developing country	41.586	41.6071	41.6097	41.2788	41.5835
y2080	KEN	Developing country	17.6799	19.6271	17.67	19.74	17.7946
y2080	ERI	Developing country	3.95495	3.89748	3.6455	4.13054	3.51779
y2080	SOM	Developing country	21.9385	22.3487	21.9435	22.3491	21.9391
y2080	DJI	Developing country	0.00677769	0.00633274	0.00677663	0.00677664	0.0067734
y2080	MDG	Developing country	12.3912	12.0514	12.3071	12.0994	11.9705
y2080	MUS	Developing country	0	0	0	0	0
y2080	ATF	Developing country	0	0	0	0	0
y2080	CHN	Developing country	639.258	583.347	593.851	615.006	598.489
y2080	IND	Developing country	1023.67	1001.21	1012.23	1012.24	977.184
y2080	NPL	Developing country	22.4587	24.6321	23.6145	23.5574	25.2088
y2080	MNG	Developing country	1.60776	1.38084	6.92049	1.48974	1.36709
y2080	MMR	Developing country	101.891	81.3166	108.014	107.106	77.6726
y2080	LAO	Developing country	63.6798	70.6937	69.6775	69.2745	70.5622
y2080	THA	Developing country	99.0611	79.4964	100.642	101.058	84.1709
y2080	KHM	Developing country	31.3558	24.7263	32.9902	32.824	23.8727
y2080	VNM	Developing country	101.413	111.991	106.957	106.712	113.722
y2080	RUS	Developing country	164.408	164.375	164.428	164.341	164.346
y2080	PRK	Developing country	6.38775	7.55525	7.41887	6.72189	9.48394
y2080	GRL	Developed income	1.10829	1.10829	1.10829	1.10829	1.10829
y2080	ISL	Developing country	0.875779	0.875612	0.875752	0.875748	0.875488
y2080	ESP	Developed income	25.6926	24.2754	25.1958	24.7988	24.2574
y2080	IRL	Developing country	0.933771	0.932005	0.931996	0.932196	0.931629
y2080	PRT	Developing country	3.24912	3.10774	3.11029	3.11029	3.10579
y2080	GBR	Developed income	5.31808	4.50799	5.31181	5.32335	4.48999
y2080	FRA	Developed income	23.5457	20.5378	27.5134	20.5038	20.4739
y2080	BEL	Developed income	0.691115	0.677135	0.673746	0.675896	0.67256
y2080	NLD	Developing country	0.652778	0.649149	0.646022	0.647865	0.645367
y2080	NOR	Developing country	3.46487	3.49142	3.3689	3.38611	3.62449
y2080	LUX	Developing country	0.0335681	0.033709	0.0335215	0.0336514	0.0334124
y2080	DEU	Developed income	9.05565	8.85506	9.7985	9.61507	8.80293
y2080	CHE	Developed income	0.646021	0.714474	0.516915	0.544577	0.797844
y2080	ITA	Developing country	20.5045	21.6408	23.3168	23.2974	21.656
y2080	DNK	Developed income	1.49689	1.50977	1.49506	1.50085	1.50279
y2080	AUT	Developed income	2.12177	1.20513	2.8443	2.6953	1.20012
y2080	SWE	Developing country	2.7701	4.05953	2.76605	2.76745	4.05642
y2080	CZE	Developed income	2.38937	2.40381	2.51621	2.54822	2.39054
y2080	HRV	Developing country	2.28852	1.43039	3.86878	3.07757	1.42367
y2080	SVN	Developing country	0.546154	0.241683	0.900247	0.536969	0.240002
y2080	SJM	Developing country	0.0706335	0.0706335	0.0706335	0.0706335	0.0706335
y2080	POL	Developing country	10.3953	10.4771	10.3823	10.4219	10.4239
y2080	BIH	Developing country	2.19005	2.48813	1.64569	1.76364	2.81151
y2080	HUN	Developing country	5.50761	5.35137	11.1912	12.1052	5.34025
y2080	SVK	Developing country	1.67879	1.32728	2.26703	2.33045	1.3211
y2080	MNE	Developing country	0.430544	0.488547	0.322321	0.345593	0.556643
y2080	SRB	Developing country	8.32409	9.64002	6.36418	6.82282	10.0714
y2080	ALB	Developing country	1.06333	1.20704	0.827722	0.880823	1.30275
y2080	GRC	Developed income	6.24628	6.3791	6.37937	6.37937	6.38081
y2080	MKD	Developing country	1.31615	1.49923	1.01141	1.0797	1.63126
y2080	ROU	Developed income	12.5229	12.256	12.2202	12.2261	12.2376
y2080	LTU	Developing country	2.15847	2.17521	2.15577	2.16412	2.16341
y2080	LVA	Developing country	0.682762	0.684844	0.681781	0.684345	0.678427
y2080	FIN	Developed income	2.0707	2.89496	2.06692	2.06697	2.89489
y2080	EST	Developed income	0.729039	0.72971	0.727801	0.729114	0.726411
y2080	BGR	Developing country	5.88007	5.5742	8.99387	8.92103	5.56778
y2080	BLR	Developing country	2.9374	2.92483	2.94159	2.93944	2.93063
y2080	TUR	Developing country	19.5374	20.3794	18.1232	18.4391	21.0152
y2080	MDA	Developing country	1.02453	1.01947	1.02576	1.02572	1.02223
y2080	CYP	Developed income	0.0969462	0.0964807	0.0969462	0.0969462	0.0964534
y2080	IRN	Developing country	31.5692	31.548	31.5849	31.5628	31.5612
y2080	UKR	Developing country	16.0571	15.978	16.076	16.0755	16.0207
y2080	GEO	Developing country	0.566646	0.564694	0.567186	0.566918	0.56551
y2080	ARM	Developing country	0.478881	0.484718	0.474757	0.475502	0.480007
y2080	AZE	Developing country	3.26025	3.35438	3.2107	3.22201	3.28931
y2080	KAZ	Developing country	21.0283	21.1524	20.8715	20.8876	21.023
y2080	TKM	Developing country	7.92573	7.91223	7.85814	7.87589	7.97235
y2080	UZB	Developing country	17.1991	17.7045	16.9251	16.9984	17.4252
y2080	AFG	Developing country	10.8475	11.4046	10.8663	10.8649	11.5717
y2080	TJK	Developing country	3.3019	3.38606	3.24756	3.25688	3.32555
y2080	KGZ	Developing country	3.33883	3.42148	3.29547	3.30588	3.36458
y2080	MEX	Developing country	207.775	126.631	135.547	145.624	133.59
y2080	USA	Developed income	272.625	255.875	260.75	259.558	235.41
y2080	GTM	Developing country	17.1945	5.31964	7.07066	7.7155	4.88863
y2080	ECU	Developing country	13.6415	13.3522	13.4014	13.4082	10.4403
y2080	SLV	Developing country	5.91524	2.17108	2.49594	3.22384	2.04374
y2080	HND	Developing country	12.5409	5.27407	6.66591	7.6299	5.03321
y2080	BLZ	Developing country	2.24628	0.190082	0.819996	0.854192	0.165131
y2080	NIC	Developing country	9.42875	5.41866	6.11607	6.84825	5.48595
y2080	CRI	Developing country	3.99315	2.10972	2.41613	2.45506	2.08788
y2080	CUB	Developing country	21.5253	10.3921	8.19647	8.1274	9.20821
y2080	PAN	Developing country	4.11814	3.60812	3.67409	3.72501	3.71035
y2080	PER	Developing country	24.8199	22.1506	22.449	22.5451	21.1235
y2080	COL	Developing country	43.2194	36.1464	39.4513	39.5168	33.4481
y2080	BHS	Developed income	0.17178	0.00461887	0.0633507	0.0665393	0.00399548
y2080	JAM	Developing country	0.822458	0.333905	0.360657	0.3621	0.304916
y2080	CHL	Developed income	21.6401	20.6609	20.7625	20.7655	19.2809
y2080	HTI	Developing country	5.83576	2.53689	2.15885	2.4203	2.27033
y2080	BRA	Developing country	296.103	240.055	277.751	270.051	190.432
y2080	ARG	Developing country	174.864	56.2321	116.112	105.623	41.4799
y2080	VEN	Developing country	68.9773	45.0898	57.3055	68.8465	50.6399
y2080	DOM	Developing country	8.81419	3.96755	3.78962	3.93662	3.5937
y2080	BOL	Developing country	11.9213	9.39772	9.98198	10.1207	9.42356
y2080	PRY	Developing country	6.48394	5.54202	6.17827	6.07357	5.2603
y2080	TTO	Developing country	1.7386	1.58333	1.66488	1.73811	0.374517
y2080	FLK	Developing country	8e-15	8e-15	8e-15	8e-15	8e-15
y2080	GUY	Developing country	12.4011	11.7765	12.0649	12.3859	8.07462
y2080	URY	Developed income	79.465	17.4362	29.2711	27.3148	8.81851
y2080	SUR	Developing country	1.86951	2.30077	1.86939	1.86964	3.3923
y2080	GUF	Developing country	0.211939	0.676092	0.212008	0.212193	2.46949
y2080	SGS	Developing country	1e-15	1e-15	1e-15	1e-15	1e-15
y2080	MAR	Developing country	33.065	33.1535	33.1157	33.0592	33.0648
y2080	TUN	Developing country	4.88137	4.87369	4.88471	4.66775	4.88101
y2080	SAU	Developing country	6.46839	6.07572	6.88268	6.39063	6.30747
y2080	ISR	Developing country	1.02619	1.02619	1.02619	1.02619	1.02619
y2080	JOR	Developing country	0.555021	0.555021	0.555021	0.555021	0.555021
y2080	LBN	Developing country	1.32337	1.32333	1.32337	1.32337	1.32337
y2080	SYR	Developing country	4.18058	4.18083	4.18062	4.18062	4.1806
y2080	IRQ	Developing country	5.18818	5.18811	5.18866	5.18774	5.18836
y2080	YEM	Developing country	4.18562	4.08456	4.29211	4.1656	4.14723
y2080	KWT	Developing country	0.168229	0.168229	0.168229	0.168229	0.168229
y2080	QAT	Developing country	0.00359914	0.00359914	0.00359914	0.00359914	0.00359914
y2080	OMN	Developing country	0.167207	0.139457	0.19645	0.161709	0.157632
y2080	ARE	Developed income	0.0829675	0.0829675	0.0829675	0.0829675	0.0829675
y2080	PAK	Developing country	94.7551	93.9833	95.0221	94.97	95.5951
y2080	CAN	Developed income	68.7528	68.8151	68.7075	68.7353	68.7574
y2080	PRI	Developing country	0.795776	0.261169	0.305915	0.308337	0.232412
y2080	AUS	Developed income	23.0784	21.9884	34.9635	31.6657	21.9751
y2080	JPN	Developing country	31.0041	33.4096	33.1334	33.1776	33.5857
y2080	NZL	Developing country	12.9773	12.9795	12.9757	12.9767	12.9591
y2080	IDN	Developing country	119.345	116.207	111.937	112.3	112.902
y2080	MYS	Developing country	20.256	19.3603	17.5662	18.1668	18.3402
y2080	SGP	Developing country	0.0610956	0.0580432	0.0513051	0.0539759	0.0545672
y2080	BRN	Developed income	0.107831	0.102443	0.122885	0.0952647	0.0963084
y2080	PHL	Developing country	29.6363	26.7804	27.025	27.9558	26.4204
y2080	TLS	Developing country	1.08372	1.15795	1.07078	1.09226	1.09957
y2080	KOR	Developing country	6.91825	8.2279	7.41391	7.29089	10.3642
y2080	PNG	Developing country	5.9862	6.37907	7.39115	6.04801	6.28072
y2080	SLB	Developing country	0.0872748	0.0829144	0.18265	0.0771043	0.077949
y2080	NCL	Developing country	0.201869	0.163313	0.299207	0.211178	0.138133
y2080	VUT	Developing country	0.0494365	0.0469666	0.0480094	0.0436755	0.044154
y2080	FJI	Developing country	0.355678	0.340715	0.336044	0.320983	0.323852
y2080	REU	Developing country	0.0106591	0.0106643	0.00899882	0.0105511	0.0105058
y2080	LKA	Developing country	19.2132	20.785	19.8576	19.8842	20.8246
y2080	BGD	Developing country	62.5427	64.4407	62.6349	62.6996	65.4862
y2080	BTN	Developing country	0.360683	0.38105	0.354153	0.351524	0.409408
y2090	SEN	Developing country	21.2451	8.50927	22.3921	22.6827	14.4198
y2090	GMB	Developing country	0.0824971	0.0786732	0.0823702	0.108811	0.0909975
y2090	MRT	Developing country	5.40713	4.0282	4.6487	4.41916	4.17071
y2090	ESH	Developing country	3e-14	2.9e-14	3e-14	2.9e-14	2.9e-14
y2090	GNB	Developing country	0.531101	0.469048	0.530473	0.699123	0.54251
y2090	GIN	Developing country	8.84735	7.77083	8.49903	9.69926	8.30453
y2090	SLE	Developing country	7.31482	3.71969	4.50716	3.7968	3.73538
y2090	MLI	Developing country	34.4896	8.1822	20.7625	22.0844	13.7012
y2090	LBR	Developing country	7.60951	3.64072	4.48637	3.6323	3.6331
y2090	CIV	Developing country	26.2367	32.182	31.2417	33.2749	32.3987
y2090	BFA	Developing country	22.0856	4.57489	13.8175	14.959	8.80621
y2090	GHA	Developing country	18.7271	21.0446	20.6673	21.7609	21.265
y2090	TGO	Developing country	4.5479	6.36477	5.84618	6.22027	6.21035
y2090	NER	Developing country	71.8202	48.3808	86.0661	86.0661	64.5575
y2090	BEN	Developing country	4.04318	3.96309	4.40938	4.67559	4.86456
y2090	DZA	Developing country	3.25696	3.18877	3.25686	3.21831	3.16879
y2090	NGA	Developing country	95.7697	63.3715	121.477	122.188	86.4423
y2090	CMR	Developing country	38.5564	16.6727	35.7025	35.1084	17.9129
y2090	GAB	Developing country	2.11449	2.10956	2.11418	2.11295	2.10516
y2090	GNQ	Developing country	0.670858	0.555547	0.585007	0.559506	0.554844
y2090	NAM	Developing country	2.31167	2.26517	2.34355	2.25201	2.19573
y2090	AGO	Developing country	7.89787	7.36547	7.81355	7.51073	7.35641
y2090	COG	Developing country	4.83753	2.794	3.23374	2.79834	2.78828
y2090	COD	Developing country	31.8859	29.918	31.1131	31.0644	29.9494
y2090	LBY	Developing country	8.75463	8.76019	8.76525	8.65504	8.74312
y2090	TCD	Developing country	81.4736	5.01802	31.3065	30.2334	8.53865
y2090	CAF	Developing country	18.7993	3.16366	7.21347	6.85333	3.15187
y2090	ZAF	Developing country	38.1696	37.3508	37.3887	37.3719	37.7045
y2090	BWA	Developing country	2.11528	2.10773	2.11995	2.1085	2.10777
y2090	ZMB	Developing country	6.84385	6.83153	6.84521	6.84528	6.29243
y2090	SDN	Developing country	46.8149	39.6179	44.2608	43.7593	42.1785
y2090	ZWE	Developing country	8.31534	8.58465	8.58731	8.58524	8.51439
y2090	LSO	Developing country	1.00874	1.00657	1.15289	1.01495	1.00756
y2090	BDI	Developing country	1.50026	1.61186	1.5312	1.53787	1.60913
y2090	RWA	Developing country	0.852446	0.950517	0.879606	0.885597	0.948953
y2090	TZA	Developing country	13.9643	13.7452	13.804	13.6111	10.3786
y2090	UGA	Developing country	8.28064	8.65277	8.37814	8.36015	8.61142
y2090	MOZ	Developing country	7.44621	7.87563	7.88859	7.87792	7.71778
y2090	SWZ	Developing country	0.153603	0.150731	0.150813	0.150737	0.153392
y2090	MWI	Developing country	0.828189	0.814261	0.815782	0.815512	0.91632
y2090	ETH	Developing country	20.2197	19.387	20.1206	20.0411	19.5574
y2090	EGY	Developing country	41.1983	41.3966	41.2195	40.4452	41.1942
y2090	KEN	Developing country	20.1154	19.4116	19.6983	17.6683	17.758
y2090	ERI	Developing country	4.45281	3.77923	4.0358	3.54618	3.43411
y2090	SOM	Developing country	23.8785	22.1769	23.8403	23.3713	21.813
y2090	DJI	Developing country	0.00693065	0.0060971	0.00655239	0.00655239	0.00654905
y2090	MDG	Developing country	13.4935	12.7223	13.3886	13.2428	12.6584
y2090	MUS	Developing country	0	0	0	0	0
y2090	ATF	Developing country	0	0	0	0	0
y2090	CHN	Developing country	575.681	488.247	493.544	513.834	530.961
y2090	IND	Developing country	886.631	876.911	872.657	873.93	873.445
y2090	NPL	Developing country	21.7386	23.8371	23.0007	22.9595	23.9571
y2090	MNG	Developing country	1.57366	1.31186	6.80563	1.58852	1.33679
y2090	MMR	Developing country	89.7436	74.4381	106.996	106.341	76.6918
y2090	LAO	Developing country	61.251	68.246	67.5961	67.2084	68.1914
y2090	THA	Developing country	84.7993	73.1729	99.483	100.097	83.7043
y2090	KHM	Developing country	27.3638	22.5858	32.6361	32.5417	23.7824
y2090	VNM	Developing country	98.2475	108.64	103.905	103.697	109.012
y2090	RUS	Developing country	163.571	163.232	163.141	163.178	163.267
y2090	PRK	Developing country	6.49182	7.36311	7.85101	7.2358	7.35554
y2090	GRL	Developed income	1.10825	1.10825	1.10825	1.10825	1.10825
y2090	ISL	Developing country	0.90185	0.901653	0.901789	0.901789	0.901532
y2090	ESP	Developed income	25.5778	23.5895	24.4629	24.1107	23.5742
y2090	IRL	Developing country	0.975909	0.974439	0.974485	0.974635	0.97412
y2090	PRT	Developing country	3.2368	3.01891	3.02153	3.02153	3.01699
y2090	GBR	Developed income	5.39345	4.55301	5.386	5.39458	4.53828
y2090	FRA	Developed income	23.4824	20.1649	25.688	20.1491	20.1811
y2090	BEL	Developed income	0.696467	0.672453	0.669749	0.67135	0.66849
y2090	NLD	Developing country	0.652339	0.644488	0.641923	0.643296	0.641227
y2090	NOR	Developing country	3.55192	3.57549	3.45843	3.47052	3.70492
y2090	LUX	Developing country	0.0335015	0.0335725	0.0334352	0.0335322	0.0333123
y2090	DEU	Developed income	9.03942	8.83759	9.72057	9.54871	8.79765
y2090	CHE	Developed income	0.64209	0.705655	0.51644	0.535902	0.786539
y2090	ITA	Developing country	19.3766	21.2939	22.8384	22.8087	21.3162
y2090	DNK	Developed income	1.49085	1.50258	1.48815	1.49246	1.49722
y2090	AUT	Developed income	2.13308	1.19843	2.7954	2.65858	1.19739
y2090	SWE	Developing country	2.87051	4.20573	2.86705	2.8681	4.20301
y2090	CZE	Developed income	2.38192	2.39452	2.49504	2.52079	2.38435
y2090	HRV	Developing country	2.27063	1.40044	3.689	2.98279	1.40129
y2090	SVN	Developing country	0.532094	0.236711	0.866231	0.545458	0.23639
y2090	SJM	Developing country	0.0693852	0.0693852	0.0693852	0.0693852	0.0693852
y2090	POL	Developing country	10.3798	10.4522	10.3608	10.3904	10.4099
y2090	BIH	Developing country	2.15732	2.43457	1.6275	1.7105	2.74813
y2090	HUN	Developing country	5.3605	5.23567	10.5072	11.2568	5.25534
y2090	SVK	Developing country	1.67879	1.31875	2.21215	2.26215	1.31643
y2090	MNE	Developing country	0.424067	0.47798	0.318708	0.335089	0.544047
y2090	SRB	Developing country	8.20567	9.43933	6.29814	6.6212	9.85169
y2090	ALB	Developing country	1.04934	1.18358	0.820034	0.85742	1.27606
y2090	GRC	Developed income	6.03786	6.24351	6.24357	6.24357	6.2452
y2090	MKD	Developing country	1.29603	1.46694	0.999449	1.04753	1.59458
y2090	ROU	Developed income	12.0459	12.0388	12.0737	11.8712	12.0706
y2090	LTU	Developing country	2.1517	2.16624	2.14772	2.15395	2.15677
y2090	LVA	Developing country	0.682575	0.683104	0.681212	0.683127	0.677406
y2090	FIN	Developed income	2.15836	3.01259	2.15543	2.15547	3.01253
y2090	EST	Developed income	0.746801	0.746859	0.745534	0.746513	0.743928
y2090	BGR	Developing country	5.68178	5.48865	8.61885	8.52925	5.49762
y2090	BLR	Developing country	2.80786	2.79725	2.80716	2.80746	2.80334
y2090	TUR	Developing country	19.416	20.2026	18.0383	18.2609	20.8181
y2090	MDA	Developing country	0.979483	0.976456	0.980917	0.980741	0.978989
y2090	CYP	Developed income	0.0916154	0.0911754	0.0916154	0.0916154	0.0911496
y2090	IRN	Developing country	31.7784	31.76	31.7805	31.7724	31.7769
y2090	UKR	Developing country	15.357	15.309	15.3782	15.376	15.3484
y2090	GEO	Developing country	0.549208	0.54747	0.548904	0.549055	0.548347
y2090	ARM	Developing country	0.484292	0.478835	0.468293	0.470125	0.475937
y2090	AZE	Developing country	3.32741	3.26971	3.11951	3.14431	3.22892
y2090	KAZ	Developing country	20.9837	20.7969	20.5013	20.5508	20.718
y2090	TKM	Developing country	8.30319	7.74086	8.00521	8.04185	7.85273
y2090	UZB	Developing country	17.9021	17.2429	16.69	16.8404	17.121
y2090	AFG	Developing country	12.0193	12.0458	12.0487	12.0353	12.7608
y2090	TJK	Developing country	3.40681	3.30392	3.17979	3.20304	3.27086
y2090	KGZ	Developing country	3.41731	3.36568	3.23425	3.25623	3.33013
y2090	MEX	Developing country	197.815	130.788	131.176	143.685	130.723
y2090	USA	Developed income	268.17	246.752	257.964	256.316	232.805
y2090	GTM	Developing country	16.461	5.58874	6.94915	7.62515	4.99845
y2090	ECU	Developing country	13.8698	13.3694	13.3073	13.241	10.3599
y2090	SLV	Developing country	5.33427	2.86372	2.45498	3.236	2.08521
y2090	HND	Developing country	11.8242	5.76314	6.56199	7.41552	5.07951
y2090	BLZ	Developing country	2.19441	0.176071	0.805265	0.844318	0.171821
y2090	NIC	Developing country	8.87137	5.77549	5.98058	6.17567	5.43344
y2090	CRI	Developing country	3.89554	2.02822	2.35871	2.35521	2.06331
y2090	CUB	Developing country	20.9825	9.72668	8.03471	8.01458	9.49349
y2090	PAN	Developing country	4.00291	3.50034	3.57	3.5191	3.61247
y2090	PER	Developing country	24.3686	21.8978	22.0513	22.1246	20.7637
y2090	COL	Developing country	42.458	35.382	38.5954	38.3385	32.7215
y2090	BHS	Developed income	0.167843	0.00427877	0.0622187	0.0657766	0.00415767
y2090	JAM	Developing country	0.810399	0.321557	0.360272	0.363299	0.316671
y2090	CHL	Developed income	18.7773	18.1034	17.9549	17.838	16.5313
y2090	HTI	Developing country	5.51911	2.69591	2.12109	2.41117	2.34504
y2090	BRA	Developing country	298.651	240.299	273.441	260.31	189.987
y2090	ARG	Developing country	182.236	56.9081	111.552	103.125	42.6043
y2090	VEN	Developing country	67.5133	42.3337	56.1181	67.2962	49.6664
y2090	DOM	Developing country	8.51599	3.86448	3.71197	3.88646	3.67018
y2090	BOL	Developing country	12.2622	9.81793	10.2082	10.3584	9.67478
y2090	PRY	Developing country	6.75079	5.80278	6.37811	6.28398	5.50855
y2090	TTO	Developing country	1.70867	1.54534	1.63691	1.70798	0.36749
y2090	FLK	Developing country	8e-15	8e-15	8e-15	8e-15	8e-15
y2090	GUY	Developing country	12.2021	11.5227	11.8546	12.1446	7.95271
y2090	URY	Developed income	80.7608	17.3079	26.1637	25.1444	9.07741
y2090	SUR	Developing country	1.8456	2.27151	1.84547	1.84571	3.34886
y2090	GUF	Developing country	0.20992	0.66823	0.209989	0.210171	2.43629
y2090	SGS	Developing country	1e-15	1e-15	1e-15	1e-15	1e-15
y2090	MAR	Developing country	33.4026	33.4856	33.4491	33.3958	33.3999
y2090	TUN	Developing country	4.80214	4.78581	4.80514	4.29683	4.80154
y2090	SAU	Developing country	6.40989	6.01441	6.44742	6.33938	6.32408
y2090	ISR	Developing country	1.23742	1.23742	1.23742	1.23742	1.23742
y2090	JOR	Developing country	0.672618	0.672618	0.672618	0.672618	0.672618
y2090	LBN	Developing country	1.37232	1.37228	1.37232	1.37232	1.37232
y2090	SYR	Developing country	4.77004	4.77003	4.77004	4.77009	4.77002
y2090	IRQ	Developing country	5.55818	5.55742	5.55793	5.55756	5.55764
y2090	YEM	Developing country	4.75894	4.65782	4.76848	4.7409	4.73993
y2090	KWT	Developing country	0.172524	0.172524	0.172524	0.172524	0.172524
y2090	QAT	Developing country	0.00375983	0.00375983	0.00375983	0.00375983	0.00375983
y2090	OMN	Developing country	0.167924	0.13993	0.170566	0.16293	0.163619
y2090	ARE	Developed income	0.0854712	0.0854712	0.0854712	0.0854712	0.0854712
y2090	PAK	Developing country	86.9208	86.4175	88.539	88.4888	88.7235
y2090	CAN	Developed income	69.474	69.6173	69.4804	69.5089	69.5249
y2090	PRI	Developing country	0.786359	0.248119	0.304963	0.309102	0.243346
y2090	AUS	Developed income	22.436	21.7907	33.9752	31.4275	21.7678
y2090	JPN	Developing country	30.7276	32.0041	31.9776	31.9467	31.9854
y2090	NZL	Developing country	13.1792	13.1318	13.1269	13.1279	13.1106
y2090	IDN	Developing country	118.905	121.779	111.616	112.007	112.625
y2090	MYS	Developing country	20.5566	21.3535	17.8743	18.4916	18.6693
y2090	SGP	Developing country	0.0620988	0.0648164	0.0523172	0.0550576	0.0556637
y2090	BRN	Developed income	0.109625	0.114423	0.125336	0.0971949	0.0982651
y2090	PHL	Developing country	28.2184	27.8237	27.0743	28.0487	26.5717
y2090	TLS	Developing country	1.0256	1.10028	1.0134	1.03364	1.04104
y2090	KOR	Developing country	7.04329	8.02601	7.92021	7.86363	8.02098
y2090	PNG	Developing country	5.9333	6.4893	7.35758	5.99003	6.18298
y2090	SLB	Developing country	0.0887299	0.0926131	0.186307	0.0786691	0.0795352
y2090	NCL	Developing country	0.186508	0.15537	0.299644	0.210362	0.138577
y2090	VUT	Developing country	0.0502639	0.0524636	0.0489717	0.0445646	0.0450552
y2090	FJI	Developing country	0.35962	0.371898	0.340722	0.325439	0.328382
y2090	REU	Developing country	0.0113192	0.0112752	0.00953804	0.0111817	0.0111393
y2090	LKA	Developing country	18.603	20.2384	19.1974	19.2247	20.1454
y2090	BGD	Developing country	59.727	62.2103	60.6764	60.7525	63.4974
y2090	BTN	Developing country	0.364562	0.395341	0.361231	0.359454	0.368892
y2100	SEN	Developing country	20.1001	8.3156	21.6368	22.0423	14.0967
y2100	GMB	Developing country	0.0820308	0.0787113	0.0816582	0.115714	0.0901993
y2100	MRT	Developing country	5.60207	3.94895	4.42271	4.50584	4.1403
y2100	ESH	Developing country	2.6e-14	2.5e-14	2.6e-14	2.5e-14	2.5e-14
y2100	GNB	Developing country	0.528686	0.469811	0.526472	0.744306	0.538365
y2100	GIN	Developing country	9.74231	8.60734	9.31708	10.8831	9.0974
y2100	SLE	Developing country	8.69172	4.41761	5.34917	4.51193	4.42539
y2100	MLI	Developing country	38.6981	8.15539	20.2617	21.9828	13.5474
y2100	LBR	Developing country	9.04333	4.31818	5.32626	4.31224	4.30433
y2100	CIV	Developing country	30.8087	37.9835	36.7662	39.2849	38.128
y2100	BFA	Developing country	24.6447	4.69793	13.5586	15.0304	8.81466
y2100	GHA	Developing country	21.8945	24.692	24.1993	25.5743	24.8607
y2100	TGO	Developing country	5.34504	7.50108	6.8909	7.34232	7.31385
y2100	NER	Developing country	62.8298	45.9494	82.1552	82.1526	61.8041
y2100	BEN	Developing country	4.56961	4.54764	4.98236	5.30671	5.48893
y2100	DZA	Developing country	3.33319	3.24099	3.33276	3.32249	3.24858
y2100	NGA	Developing country	94.4746	72.8123	128.511	129.277	95.3138
y2100	CMR	Developing country	40.7868	18.4334	37.6961	35.9763	19.6274
y2100	GAB	Developing country	2.15489	2.1496	2.15451	2.15321	2.14499
y2100	GNQ	Developing country	0.703297	0.565158	0.600306	0.57002	0.564282
y2100	NAM	Developing country	2.64775	2.42854	2.49766	2.42811	2.31014
y2100	AGO	Developing country	8.93087	7.85971	8.30337	8.02639	7.83687
y2100	COG	Developing country	5.3644	2.93206	3.45521	2.93687	2.92522
y2100	COD	Developing country	35.1979	31.5093	32.3844	32.3431	30.8748
y2100	LBY	Developing country	8.77193	8.76194	8.78177	8.66915	8.73447
y2100	TCD	Developing country	88.135	5.16729	41.6456	29.2821	8.62866
y2100	CAF	Developing country	19.043	3.08499	10.8067	6.60529	3.07268
y2100	ZAF	Developing country	40.1669	39.3192	39.3362	39.3263	39.5316
y2100	BWA	Developing country	2.19217	2.18563	2.19678	2.18422	2.17166
y2100	ZMB	Developing country	7.9535	7.86271	7.87141	7.87142	7.06167
y2100	SDN	Developing country	48.3147	39.7838	45.7463	45.1807	43.714
y2100	ZWE	Developing country	8.87119	9.14786	9.15795	9.14847	9.09936
y2100	LSO	Developing country	1.00163	1.00108	1.15371	1.00749	1.0003
y2100	BDI	Developing country	1.63368	1.75847	1.66694	1.65102	1.7555
y2100	RWA	Developing country	0.951343	1.06081	0.980508	0.966831	1.05907
y2100	TZA	Developing country	15.6141	15.4299	15.376	15.4371	10.4349
y2100	UGA	Developing country	9.0647	9.48817	9.14959	9.10995	9.45199
y2100	MOZ	Developing country	8.26948	8.6904	8.71457	8.69139	8.58695
y2100	SWZ	Developing country	0.166976	0.164024	0.16403	0.164031	0.16658
y2100	MWI	Developing country	0.959454	0.924161	0.924974	0.925295	1.03867
y2100	ETH	Developing country	22.969	20.9821	22.7694	22.3448	21.3497
y2100	EGY	Developing country	41.6187	41.5006	41.524	40.7211	41.5452
y2100	KEN	Developing country	20.0375	19.4282	18.6145	19.2117	18.1762
y2100	ERI	Developing country	4.41562	3.70229	3.65836	3.82476	3.44673
y2100	SOM	Developing country	26.4568	21.593	26.1928	25.0847	21.3064
y2100	DJI	Developing country	0.00682862	0.00598424	0.00646139	0.00645963	0.00645795
y2100	MDG	Developing country	14.5921	13.3664	14.4369	14.0228	13.3145
y2100	MUS	Developing country	0	0	0	0	0
y2100	ATF	Developing country	0	0	0	0	0
y2100	CHN	Developing country	485.226	443.876	458.058	454.118	476.972
y2100	IND	Developing country	736.714	730.403	724.932	726.155	727.473
y2100	NPL	Developing country	21.2765	23.0729	22.1704	22.1246	23.1506
y2100	MNG	Developing country	1.56151	1.23484	6.55057	1.56168	1.2389
y2100	MMR	Developing country	94.281	69.3757	104.756	103.652	75.878
y2100	LAO	Developing country	59.958	66.0164	65.3682	64.8573	66.0286
y2100	THA	Developing country	88.6252	68.5395	97.4476	97.6331	82.8609
y2100	KHM	Developing country	28.7495	21.0314	31.9761	31.7376	23.5638
y2100	VNM	Developing country	95.7711	105.381	100.212	99.9641	105.429
y2100	RUS	Developing country	166.01	165.818	165.972	165.82	165.953
y2100	PRK	Developing country	6.95789	7.04449	7.5264	6.94737	7.03658
y2100	GRL	Developed income	1.09284	1.09284	1.09284	1.09284	1.09284
y2100	ISL	Developing country	0.932242	0.932044	0.932176	0.932176	0.931926
y2100	ESP	Developed income	25.5551	23.57	24.351	24.0296	23.5543
[truncated: 113 more rows]

## Sheet: Global-level
Year	BaU	EAT	HUS	MED	VEG
2020	4455.12	4455.12	4455.12	4455.12	4455.12
2025	4554.03	4523.93	4656.41	4674.21	4445.2
2030	4643.82	4598	4693.09	4655.66	4466.5
2035	4642.31	4599.17	4722.76	4697.48	4448.5
2040	4655.82	4602.18	4711.75	4695.35	4417.45
2045	4796.03	4637.28	4789.69	4706.07	4416.44
2050	5151.86	4712.14	4937.15	4848.05	4553.93
2055	5170.64	4659.07	5094.39	4882.07	4550.13
2060	5175.64	4606.11	5090.12	4985.25	4496.99
2070	5203.03	4479.32	4955.13	4941.76	4421.75
2080	5181.13	4445.17	4881.48	4888.05	4408.51
2090	4979.72	4211.18	4611.48	4619.34	4221.97
2100	4741.11	4023.08	4435.8	4398.81	4026.81
