# Supplementary material for: Transitioning to healthy and sustainable diets has high environmental and affordability trade-offs for developing countries
Source: Research Square preprint supplement (doi:10.21203/rs.3.rs-3278140/v1), 2023-08-29
Supplement: Supplementary file 2 [file 1a9c1fe499054a36051d3d96.xlsx]

## Sheet: DataS7
Total caloric needs in different dietary scenarios									Differences in total caloric needs
Country	Region	year	BaU	EAT	HUS	MED	VEG		Country	Region	year	EAT	HUS	MED	VEG
SEN	Africa	y2020	42530.5	42530.5	42530.5	42530.5	42530.5		SEN	Africa	y2020	0	0	0	0		求和项:EAT	列标签
GMB	Africa	y2020	6626.2	6626.2	6626.2	6626.2	6626.2		GMB	Africa	y2020	0	0	0	0		行标签	Africa	Asia	Europe	Latin America	North America	Oceania	总计
MRT	Africa	y2020	13679.6	13679.6	13679.6	13679.6	13679.6		MRT	Africa	y2020	0	0	0	0		y2020	0	0	0	0	0	0	0
ESH	Africa	y2020	1588.39	1588.39	1588.39	1588.39	1588.39		ESH	Africa	y2020	0	0	0	0		y2025	41069.7	33106.8	-57993.8	-10721.4	-36067.8	2432.71	-28173.9
GNB	Africa	y2020	4783.52	4783.52	4783.52	4783.52	4783.52		GNB	Africa	y2020	0	0	0	0		y2030	74611.2	17447.7	-126352	-28851.6	-74450.1	682.435	-136912
GIN	Africa	y2020	35409.7	35409.7	35409.7	35409.7	35409.7		GIN	Africa	y2020	0	0	0	0		y2035	86742.6	-38530.4	-203625	-55240.9	-119846	-1582.7	-332083
SLE	Africa	y2020	19225.9	19225.9	19225.9	19225.9	19225.9		SLE	Africa	y2020	0	0	0	0		y2040	65932.8	-137571	-285062	-88584.8	-172335	-4454.16	-622075
MLI	Africa	y2020	58663	58663	58663	58663	58663		MLI	Africa	y2020	0	0	0	0		y2045	-4905.58	-278013	-368408	-127485	-231445	-7760.24	-1.01802e+06
LBR	Africa	y2020	11598.9	11598.9	11598.9	11598.9	11598.9		LBR	Africa	y2020	0	0	0	0		y2050	-122443	-439719	-455101	-170390	-296863	-11460.2	-1.49598e+06
CIV	Africa	y2020	76889.6	76889.6	76889.6	76889.6	76889.6		CIV	Africa	y2020	0	0	0	0		y2055	-266176	-525361	-465463	-185119	-303845	-12007.1	-1.75797e+06
BFA	Africa	y2020	58490.2	58490.2	58490.2	58490.2	58490.2		BFA	Africa	y2020	0	0	0	0		y2060	-432461	-605741	-478365	-197094	-311372	-12693.2	-2.03773e+06
GHA	Africa	y2020	100460	100460	100460	100460	100460		GHA	Africa	y2020	0	0	0	0		y2070	-760894	-766949	-492458	-216556	-326720	-13942.8	-2.57752e+06
TGO	Africa	y2020	20669.3	20669.3	20669.3	20669.3	20669.3		TGO	Africa	y2020	0	0	0	0		y2080	-1.06503e+06	-882413	-500702	-227812	-344572	-14986.8	-3.03552e+06
NER	Africa	y2020	63833.5	63833.5	63833.5	63833.5	63833.5		NER	Africa	y2020	0	0	0	0		y2090	-1.31309e+06	-971726	-512278	-232760	-358955	-15831.5	-3.40464e+06
BEN	Africa	y2020	32690.8	32690.8	32690.8	32690.8	32690.8		BEN	Africa	y2020	0	0	0	0		y2100	-1.48663e+06	-1.02071e+06	-520438	-231675	-372309	-16739.1	-3.6485e+06
DZA	Africa	y2020	139113	139113	139113	139113	139113		DZA	Africa	y2020	0	0	0	0		总计	-5.18328e+06	-5.61618e+06	-4.46625e+06	-1.77229e+06	-2.94878e+06	-108343	-2.00951e+07
NGA	Africa	y2020	575092	575092	575092	575092	575092		NGA	Africa	y2020	0	0	0	0
CMR	Africa	y2020	69992.9	69992.9	69992.9	69992.9	69992.9		CMR	Africa	y2020	0	0	0	0
GAB	Africa	y2020	6292.68	6292.68	6292.68	6292.68	6292.68		GAB	Africa	y2020	0	0	0	0
GNQ	Africa	y2020	4321.97	4321.97	4321.97	4321.97	4321.97		GNQ	Africa	y2020	0	0	0	0
NAM	Africa	y2020	5472.45	5472.45	5472.45	5472.45	5472.45		NAM	Africa	y2020	0	0	0	0
AGO	Africa	y2020	78460	78460	78460	78460	78460		AGO	Africa	y2020	0	0	0	0
COG	Africa	y2020	11602.6	11602.6	11602.6	11602.6	11602.6		COG	Africa	y2020	0	0	0	0
COD	Africa	y2020	192584	192584	192584	192584	192584		COD	Africa	y2020	0	0	0	0
LBY	Africa	y2020	22447.4	22447.4	22447.4	22447.4	22447.4		LBY	Africa	y2020	0	0	0	0
TCD	Africa	y2020	34036.3	34036.3	34036.3	34036.3	34036.3		TCD	Africa	y2020	0	0	0	0
CAF	Africa	y2020	10597.8	10597.8	10597.8	10597.8	10597.8		CAF	Africa	y2020	0	0	0	0
ZAF	Africa	y2020	181368	181368	181368	181368	181368		ZAF	Africa	y2020	0	0	0	0
BWA	Africa	y2020	5469.51	5469.51	5469.51	5469.51	5469.51		BWA	Africa	y2020	0	0	0	0
ZMB	Africa	y2020	36328.9	36328.9	36328.9	36328.9	36328.9		ZMB	Africa	y2020	0	0	0	0
SDN	Africa	y2020	107479	107479	107479	107479	107479		SDN	Africa	y2020	0	0	0	0
ZWE	Africa	y2020	33546.4	33546.4	33546.4	33546.4	33546.4		ZWE	Africa	y2020	0	0	0	0
LSO	Africa	y2020	5660	5660	5660	5660	5660		LSO	Africa	y2020	0	0	0	0
BDI	Africa	y2020	25964.1	25964.1	25964.1	25964.1	25964.1		BDI	Africa	y2020	0	0	0	0
RWA	Africa	y2020	30570.2	30570.2	30570.2	30570.2	30570.2		RWA	Africa	y2020	0	0	0	0
TZA	Africa	y2020	135038	135038	135038	135038	135038		TZA	Africa	y2020	0	0	0	0
UGA	Africa	y2020	106416	106416	106416	106416	106416		UGA	Africa	y2020	0	0	0	0
MOZ	Africa	y2020	74268.9	74268.9	74268.9	74268.9	74268.9		MOZ	Africa	y2020	0	0	0	0
SWZ	Africa	y2020	2770.53	2770.53	2770.53	2770.53	2770.53		SWZ	Africa	y2020	0	0	0	0
MWI	Africa	y2020	46184	46184	46184	46184	46184		MWI	Africa	y2020	0	0	0	0
ETH	Africa	y2020	261186	261186	261186	261186	261186		ETH	Africa	y2020	0	0	0	0
EGY	Africa	y2020	367873	367873	367873	367873	367873		EGY	Africa	y2020	0	0	0	0
KEN	Africa	y2020	123458	123458	123458	123458	123458		KEN	Africa	y2020	0	0	0	0
ERI	Africa	y2020	8102.5	8102.5	8102.5	8102.5	8102.5		ERI	Africa	y2020	0	0	0	0
SOM	Africa	y2020	42829.8	42829.8	42829.8	42829.8	42829.8		SOM	Africa	y2020	0	0	0	0
DJI	Africa	y2020	2646.31	2646.31	2646.31	2646.31	2646.31		DJI	Africa	y2020	0	0	0	0
MDG	Africa	y2020	59757.9	59757.9	59757.9	59757.9	59757.9		MDG	Africa	y2020	0	0	0	0
MUS	Africa	y2020	4147.13	4147.13	4147.13	4147.13	4147.13		MUS	Africa	y2020	0	0	0	0
ATF	Asia	y2020	0.761264	0.761264	0.761264	0.761264	0.761264		ATF	Asia	y2020	0	0	0	0
CHN	Asia	y2020	4.53845e+06	4.53845e+06	4.53845e+06	4.53845e+06	4.53845e+06		CHN	Asia	y2020	0	0	0	0
IND	Asia	y2020	3.66337e+06	3.66337e+06	3.66337e+06	3.66337e+06	3.66337e+06		IND	Asia	y2020	0	0	0	0
NPL	Asia	y2020	80783.1	80783.1	80783.1	80783.1	80783.1		NPL	Asia	y2020	0	0	0	0
MNG	Asia	y2020	8480.3	8480.3	8480.3	8480.3	8480.3		MNG	Asia	y2020	0	0	0	0
MMR	Asia	y2020	145850	145850	145850	145850	145850		MMR	Asia	y2020	0	0	0	0
LAO	Asia	y2020	18785.7	18785.7	18785.7	18785.7	18785.7		LAO	Asia	y2020	0	0	0	0
THA	Asia	y2020	198971	198971	198971	198971	198971		THA	Asia	y2020	0	0	0	0
KHM	Asia	y2020	43742.4	43742.4	43742.4	43742.4	43742.4		KHM	Asia	y2020	0	0	0	0
VNM	Asia	y2020	279681	279681	279681	279681	279681		VNM	Asia	y2020	0	0	0	0
RUS	Europe	y2020	475421	475421	475421	475421	475421		RUS	Europe	y2020	0	0	0	0
PRK	Asia	y2020	55000.1	55000.1	55000.1	55000.1	55000.1		PRK	Asia	y2020	0	0	0	0
GRL	Europe	y2020	194.89	194.89	194.89	194.89	194.89		GRL	Europe	y2020	0	0	0	0
ISL	Europe	y2020	1225.81	1225.81	1225.81	1225.81	1225.81		ISL	Europe	y2020	0	0	0	0
ESP	Europe	y2020	152976	152976	152976	152976	152976		ESP	Europe	y2020	0	0	0	0
IRL	Europe	y2020	18353.8	18353.8	18353.8	18353.8	18353.8		IRL	Europe	y2020	0	0	0	0
PRT	Europe	y2020	36709.8	36709.8	36709.8	36709.8	36709.8		PRT	Europe	y2020	0	0	0	0
GBR	Europe	y2020	229790	229790	229790	229790	229790		GBR	Europe	y2020	0	0	0	0
FRA	Europe	y2020	240574	240574	240574	240574	240574		FRA	Europe	y2020	0	0	0	0
BEL	Europe	y2020	43106.6	43106.6	43106.6	43106.6	43106.6		BEL	Europe	y2020	0	0	0	0
NLD	Europe	y2020	56354.7	56354.7	56354.7	56354.7	56354.7		NLD	Europe	y2020	0	0	0	0
NOR	Europe	y2020	18911.8	18911.8	18911.8	18911.8	18911.8		NOR	Europe	y2020	0	0	0	0
LUX	Europe	y2020	2258.52	2258.52	2258.52	2258.52	2258.52		LUX	Europe	y2020	0	0	0	0
DEU	Europe	y2020	293100	293100	293100	293100	293100		DEU	Europe	y2020	0	0	0	0
CHE	Europe	y2020	29968.1	29968.1	29968.1	29968.1	29968.1		CHE	Europe	y2020	0	0	0	0
ITA	Europe	y2020	215599	215599	215599	215599	215599		ITA	Europe	y2020	0	0	0	0
DNK	Europe	y2020	20096	20096	20096	20096	20096		DNK	Europe	y2020	0	0	0	0
AUT	Europe	y2020	33370.5	33370.5	33370.5	33370.5	33370.5		AUT	Europe	y2020	0	0	0	0
SWE	Europe	y2020	32606.4	32606.4	32606.4	32606.4	32606.4		SWE	Europe	y2020	0	0	0	0
CZE	Europe	y2020	35176.4	35176.4	35176.4	35176.4	35176.4		CZE	Europe	y2020	0	0	0	0
HRV	Europe	y2020	12143.3	12143.3	12143.3	12143.3	12143.3		HRV	Europe	y2020	0	0	0	0
SVN	Europe	y2020	6669.44	6669.44	6669.44	6669.44	6669.44		SVN	Europe	y2020	0	0	0	0
SJM	Europe	y2020	9.122	9.122	9.122	9.122	9.122		SJM	Europe	y2020	0	0	0	0
POL	Europe	y2020	131145	131145	131145	131145	131145		POL	Europe	y2020	0	0	0	0
BIH	Europe	y2020	10335.8	10335.8	10335.8	10335.8	10335.8		BIH	Europe	y2020	0	0	0	0
HUN	Europe	y2020	30621.4	30621.4	30621.4	30621.4	30621.4		HUN	Europe	y2020	0	0	0	0
SVK	Europe	y2020	15992.6	15992.6	15992.6	15992.6	15992.6		SVK	Europe	y2020	0	0	0	0
MNE	Europe	y2020	2183.89	2183.89	2183.89	2183.89	2183.89		MNE	Europe	y2020	0	0	0	0
SRB	Europe	y2020	24316.2	24316.2	24316.2	24316.2	24316.2		SRB	Europe	y2020	0	0	0	0
ALB	Europe	y2020	9081.77	9081.77	9081.77	9081.77	9081.77		ALB	Europe	y2020	0	0	0	0
GRC	Europe	y2020	36930.5	36930.5	36930.5	36930.5	36930.5		GRC	Europe	y2020	0	0	0	0
MKD	Europe	y2020	6268.08	6268.08	6268.08	6268.08	6268.08		MKD	Europe	y2020	0	0	0	0
ROU	Europe	y2020	66125.1	66125.1	66125.1	66125.1	66125.1		ROU	Europe	y2020	0	0	0	0
LTU	Europe	y2020	9456.66	9456.66	9456.66	9456.66	9456.66		LTU	Europe	y2020	0	0	0	0
LVA	Europe	y2020	6085.14	6085.14	6085.14	6085.14	6085.14		LVA	Europe	y2020	0	0	0	0
FIN	Europe	y2020	18170.8	18170.8	18170.8	18170.8	18170.8		FIN	Europe	y2020	0	0	0	0
EST	Europe	y2020	4463.78	4463.78	4463.78	4463.78	4463.78		EST	Europe	y2020	0	0	0	0
BGR	Europe	y2020	19560.9	19560.9	19560.9	19560.9	19560.9		BGR	Europe	y2020	0	0	0	0
BLR	Europe	y2020	30012.3	30012.3	30012.3	30012.3	30012.3		BLR	Europe	y2020	0	0	0	0
TUR	Europe	y2020	320587	320587	320587	320587	320587		TUR	Europe	y2020	0	0	0	0
MDA	Europe	y2020	7299.29	7299.29	7299.29	7299.29	7299.29		MDA	Europe	y2020	0	0	0	0
CYP	Europe	y2020	3262.36	3262.36	3262.36	3262.36	3262.36		CYP	Europe	y2020	0	0	0	0
IRN	Africa	y2020	256331	256331	256331	256331	256331		IRN	Africa	y2020	0	0	0	0
UKR	Europe	y2020	137431	137431	137431	137431	137431		UKR	Europe	y2020	0	0	0	0
GEO	Europe	y2020	10869	10869	10869	10869	10869		GEO	Europe	y2020	0	0	0	0
ARM	Europe	y2020	8532.19	8532.19	8532.19	8532.19	8532.19		ARM	Europe	y2020	0	0	0	0
AZE	Europe	y2020	29452.2	29452.2	29452.2	29452.2	29452.2		AZE	Europe	y2020	0	0	0	0
KAZ	Europe	y2020	60531.2	60531.2	60531.2	60531.2	60531.2		KAZ	Europe	y2020	0	0	0	0
TKM	Europe	y2020	18351.5	18351.5	18351.5	18351.5	18351.5		TKM	Europe	y2020	0	0	0	0
UZB	Europe	y2020	96495.6	96495.6	96495.6	96495.6	96495.6		UZB	Europe	y2020	0	0	0	0
AFG	Asia	y2020	84353.1	84353.1	84353.1	84353.1	84353.1		AFG	Asia	y2020	0	0	0	0
TJK	Europe	y2020	21703.6	21703.6	21703.6	21703.6	21703.6		TJK	Europe	y2020	0	0	0	0
KGZ	Europe	y2020	18983.6	18983.6	18983.6	18983.6	18983.6		KGZ	Europe	y2020	0	0	0	0
MEX	Latin America	y2020	405750	405750	405750	405750	405750		MEX	Latin America	y2020	0	0	0	0
USA	North America	y2020	1.21701e+06	1.21701e+06	1.21701e+06	1.21701e+06	1.21701e+06		USA	North America	y2020	0	0	0	0
GTM	Latin America	y2020	44483.6	44483.6	44483.6	44483.6	44483.6		GTM	Latin America	y2020	0	0	0	0
ECU	Latin America	y2020	43688.7	43688.7	43688.7	43688.7	43688.7		ECU	Latin America	y2020	0	0	0	0
SLV	Latin America	y2020	17099.4	17099.4	17099.4	17099.4	17099.4		SLV	Latin America	y2020	0	0	0	0
HND	Latin America	y2020	27205.2	27205.2	27205.2	27205.2	27205.2		HND	Latin America	y2020	0	0	0	0
BLZ	Latin America	y2020	1158.78	1158.78	1158.78	1158.78	1158.78		BLZ	Latin America	y2020	0	0	0	0
NIC	Latin America	y2020	17637.5	17637.5	17637.5	17637.5	17637.5		NIC	Latin America	y2020	0	0	0	0
CRI	Latin America	y2020	15116.6	15116.6	15116.6	15116.6	15116.6		CRI	Latin America	y2020	0	0	0	0
CUB	Latin America	y2020	36669.9	36669.9	36669.9	36669.9	36669.9		CUB	Latin America	y2020	0	0	0	0
PAN	Latin America	y2020	11829.2	11829.2	11829.2	11829.2	11829.2		PAN	Latin America	y2020	0	0	0	0
PER	Latin America	y2020	90923.4	90923.4	90923.4	90923.4	90923.4		PER	Latin America	y2020	0	0	0	0
COL	Latin America	y2020	141550	141550	141550	141550	141550		COL	Latin America	y2020	0	0	0	0
BHS	Latin America	y2020	1029.04	1029.04	1029.04	1029.04	1029.04		BHS	Latin America	y2020	0	0	0	0
JAM	Latin America	y2020	8311.12	8311.12	8311.12	8311.12	8311.12		JAM	Latin America	y2020	0	0	0	0
CHL	Latin America	y2020	57310.3	57310.3	57310.3	57310.3	57310.3		CHL	Latin America	y2020	0	0	0	0
HTI	Latin America	y2020	25542.4	25542.4	25542.4	25542.4	25542.4		HTI	Latin America	y2020	0	0	0	0
BRA	Latin America	y2020	701099	701099	701099	701099	701099		BRA	Latin America	y2020	0	0	0	0
ARG	Latin America	y2020	144879	144879	144879	144879	144879		ARG	Latin America	y2020	0	0	0	0
VEN	Latin America	y2020	79385.3	79385.3	79385.3	79385.3	79385.3		VEN	Latin America	y2020	0	0	0	0
DOM	Latin America	y2020	29222.8	29222.8	29222.8	29222.8	29222.8		DOM	Latin America	y2020	0	0	0	0
BOL	Latin America	y2020	27486.6	27486.6	27486.6	27486.6	27486.6		BOL	Latin America	y2020	0	0	0	0
PRY	Latin America	y2020	19286.9	19286.9	19286.9	19286.9	19286.9		PRY	Latin America	y2020	0	0	0	0
TTO	Latin America	y2020	3948.04	3948.04	3948.04	3948.04	3948.04		TTO	Latin America	y2020	0	0	0	0
FLK	Latin America	y2020	12.457	12.457	12.457	12.457	12.457		FLK	Latin America	y2020	0	0	0	0
GUY	Latin America	y2020	2328.29	2328.29	2328.29	2328.29	2328.29		GUY	Latin America	y2020	0	0	0	0
URY	Latin America	y2020	10679.7	10679.7	10679.7	10679.7	10679.7		URY	Latin America	y2020	0	0	0	0
SUR	Latin America	y2020	1662.01	1662.01	1662.01	1662.01	1662.01		SUR	Latin America	y2020	0	0	0	0
GUF	Latin America	y2020	964.293	964.293	964.293	964.293	964.293		GUF	Latin America	y2020	0	0	0	0
SGS	Latin America	y2020	0.397276	0.397276	0.397276	0.397276	0.397276		SGS	Latin America	y2020	0	0	0	0
MAR	Africa	y2020	124544	124544	124544	124544	124544		MAR	Africa	y2020	0	0	0	0
TUN	Africa	y2020	39612.7	39612.7	39612.7	39612.7	39612.7		TUN	Africa	y2020	0	0	0	0
SAU	Africa	y2020	112391	112391	112391	112391	112391		SAU	Africa	y2020	0	0	0	0
ISR	Africa	y2020	33203.2	33203.2	33203.2	33203.2	33203.2		ISR	Africa	y2020	0	0	0	0
JOR	Africa	y2020	32711.1	32711.1	32711.1	32711.1	32711.1		JOR	Africa	y2020	0	0	0	0
LBN	Africa	y2020	21252.9	21252.9	21252.9	21252.9	21252.9		LBN	Africa	y2020	0	0	0	0
SYR	Africa	y2020	48205.2	48205.2	48205.2	48205.2	48205.2		SYR	Africa	y2020	0	0	0	0
IRQ	Africa	y2020	106017	106017	106017	106017	106017		IRQ	Africa	y2020	0	0	0	0
YEM	Africa	y2020	62616.1	62616.1	62616.1	62616.1	62616.1		YEM	Africa	y2020	0	0	0	0
KWT	Africa	y2020	15141.3	15141.3	15141.3	15141.3	15141.3		KWT	Africa	y2020	0	0	0	0
QAT	Africa	y2020	10982	10982	10982	10982	10982		QAT	Africa	y2020	0	0	0	0
OMN	Africa	y2020	16072.3	16072.3	16072.3	16072.3	16072.3		OMN	Africa	y2020	0	0	0	0
ARE	Africa	y2020	31237.3	31237.3	31237.3	31237.3	31237.3		ARE	Africa	y2020	0	0	0	0
PAK	Asia	y2020	567726	567726	567726	567726	567726		PAK	Asia	y2020	0	0	0	0
CAN	North America	y2020	131035	131035	131035	131035	131035		CAN	North America	y2020	0	0	0	0
PRI	Latin America	y2020	10683.2	10683.2	10683.2	10683.2	10683.2		PRI	Latin America	y2020	0	0	0	0
AUS	Oceania	y2020	83141.4	83141.4	83141.4	83141.4	83141.4		AUS	Oceania	y2020	0	0	0	0
JPN	Asia	y2020	344551	344551	344551	344551	344551		JPN	Asia	y2020	0	0	0	0
NZL	Oceania	y2020	16141.4	16141.4	16141.4	16141.4	16141.4		NZL	Oceania	y2020	0	0	0	0
IDN	Asia	y2020	770500	770500	770500	770500	770500		IDN	Asia	y2020	0	0	0	0
MYS	Asia	y2020	98096.7	98096.7	98096.7	98096.7	98096.7		MYS	Asia	y2020	0	0	0	0
SGP	Asia	y2020	20145.4	20145.4	20145.4	20145.4	20145.4		SGP	Asia	y2020	0	0	0	0
BRN	Asia	y2020	1308.16	1308.16	1308.16	1308.16	1308.16		BRN	Asia	y2020	0	0	0	0
PHL	Asia	y2020	306679	306679	306679	306679	306679		PHL	Asia	y2020	0	0	0	0
TLS	Asia	y2020	2898.95	2898.95	2898.95	2898.95	2898.95		TLS	Asia	y2020	0	0	0	0
KOR	Asia	y2020	172611	172611	172611	172611	172611		KOR	Asia	y2020	0	0	0	0
PNG	Asia	y2020	22546.8	22546.8	22546.8	22546.8	22546.8		PNG	Asia	y2020	0	0	0	0
SLB	Asia	y2020	1779.23	1779.23	1779.23	1779.23	1779.23		SLB	Asia	y2020	0	0	0	0
NCL	Asia	y2020	786.338	786.338	786.338	786.338	786.338		NCL	Asia	y2020	0	0	0	0
VUT	Asia	y2020	901.013	901.013	901.013	901.013	901.013		VUT	Asia	y2020	0	0	0	0
FJI	Asia	y2020	2679.57	2679.57	2679.57	2679.57	2679.57		FJI	Asia	y2020	0	0	0	0
REU	Africa	y2020	2952.84	2952.84	2952.84	2952.84	2952.84		REU	Africa	y2020	0	0	0	0
LKA	Asia	y2020	56712.9	56712.9	56712.9	56712.9	56712.9		LKA	Asia	y2020	0	0	0	0
BGD	Asia	y2020	438486	438486	438486	438486	438486		BGD	Asia	y2020	0	0	0	0
BTN	Asia	y2020	2341.25	2341.25	2341.25	2341.25	2341.25		BTN	Asia	y2020	0	0	0	0
SEN	Africa	y2025	50019.5	49580.9	49580.2	49584	49558.8		SEN	Africa	y2025	-438.6	-439.363	-435.55	-460.712
GMB	Africa	y2025	7787.18	7230.08	7229.97	7230.52	7226.85		GMB	Africa	y2025	-557.099	-557.21	-556.654	-560.324
MRT	Africa	y2025	15878.3	13761.3	13761.1	13762.1	13755.1		MRT	Africa	y2025	-2117.02	-2117.23	-2116.17	-2123.16
ESH	Africa	y2025	1613.25	1842.23	1840.57	1841.01	1843.98		ESH	Africa	y2025	228.973	227.312	227.754	230.73
GNB	Africa	y2025	5480.61	5745.9	5745.81	5746.26	5743.34		GNB	Africa	y2025	265.289	265.201	265.643	262.727
GIN	Africa	y2025	41488.7	39025.5	39024.9	39027.9	39008.1		GIN	Africa	y2025	-2463.19	-2463.79	-2460.79	-2480.6
SLE	Africa	y2025	21656.5	22904.9	22904.5	22906.3	22894.7		SLE	Africa	y2025	1248.38	1248.02	1249.79	1238.16
MLI	Africa	y2025	68902.4	60905.5	60904.6	60909.3	60878.4		MLI	Africa	y2025	-7996.89	-7997.83	-7993.15	-8024.06
LBR	Africa	y2025	13250.4	14804.4	14804.1	14805.3	14797.8		LBR	Africa	y2025	1553.93	1553.7	1554.84	1547.32
CIV	Africa	y2025	89419.2	77740.7	77739.5	77745.5	77706.1		CIV	Africa	y2025	-11678.5	-11679.7	-11673.7	-11713.2
BFA	Africa	y2025	68403.7	62412.9	62411.9	62416.7	62385		BFA	Africa	y2025	-5990.89	-5991.85	-5987.05	-6018.72
GHA	Africa	y2025	113388	89499	89497.6	89504.5	89459.1		GHA	Africa	y2025	-23888.7	-23890	-23883.1	-23928.6
TGO	Africa	y2025	23813.5	24209.9	24209.5	24211.4	24199.1		TGO	Africa	y2025	396.37	395.998	397.86	385.573
NER	Africa	y2025	78516	75756.8	75755.6	75761.4	75723		NER	Africa	y2025	-2759.18	-2760.34	-2754.52	-2792.97
BEN	Africa	y2025	38320.4	35952.3	35951.7	35954.5	35936.3		BEN	Africa	y2025	-2368.06	-2368.62	-2365.85	-2384.1
DZA	Africa	y2025	150553	146129	145997	146032	146268		DZA	Africa	y2025	-4423.62	-4555.36	-4520.29	-4284.3
NGA	Africa	y2025	652568	606932	606923	606969	606661		NGA	Africa	y2025	-45636.3	-45645.6	-45598.9	-45907
CMR	Africa	y2025	81011.8	78114	78112.8	78118.9	78079.2		CMR	Africa	y2025	-2897.72	-2898.92	-2892.91	-2932.55
GAB	Africa	y2025	7114.69	6470.79	6470.69	6471.19	6467.91		GAB	Africa	y2025	-643.902	-644.001	-643.504	-646.787
GNQ	Africa	y2025	4972.31	4258.07	4258	4258.33	4256.17		GNQ	Africa	y2025	-714.245	-714.311	-713.983	-716.144
NAM	Africa	y2025	5947.48	7215.24	7215.13	7215.69	7212.02		NAM	Africa	y2025	1267.76	1267.65	1268.2	1264.54
AGO	Africa	y2025	92257.4	100084	100082	100090	100039		AGO	Africa	y2025	7826.2	7824.66	7832.36	7781.57
COG	Africa	y2025	13198.3	16217.9	16217.7	16218.9	16210.7		COG	Africa	y2025	3019.68	3019.43	3020.68	3012.45
COD	Africa	y2025	228218	270857	270853	270874	270737		COD	Africa	y2025	42639.4	42635.2	42656.1	42518.6
LBY	Africa	y2025	24472.1	22413.2	22393	22398.4	22434.6		LBY	Africa	y2025	-2058.81	-2079.02	-2073.64	-2037.44
TCD	Africa	y2025	39450.5	49318	49317.2	49321	49296		TCD	Africa	y2025	9867.51	9866.76	9870.55	9845.52
CAF	Africa	y2025	11879.9	13883.9	13883.6	13884.7	13877.7		CAF	Africa	y2025	2004	2003.79	2004.86	1997.81
ZAF	Africa	y2025	192464	163352	163350	163362	163279		ZAF	Africa	y2025	-29112.1	-29114.6	-29102.1	-29185
BWA	Africa	y2025	6067.29	6678.61	6678.51	6679.02	6675.63		BWA	Africa	y2025	611.323	611.22	611.734	608.345
ZMB	Africa	y2025	41838.5	55134.2	55133.3	55137.6	55109.6		ZMB	Africa	y2025	13295.7	13294.8	13299.1	13271.1
SDN	Africa	y2025	123210	152189	152052	152088	152334		SDN	Africa	y2025	28979.3	28842.1	28878.6	29124.4
ZWE	Africa	y2025	36735.1	41902.7	41902	41905.2	41884		ZWE	Africa	y2025	5167.6	5166.96	5170.18	5148.92
LSO	Africa	y2025	5908.91	5796	5795.91	5796.36	5793.42		LSO	Africa	y2025	-112.904	-112.993	-112.547	-115.489
BDI	Africa	y2025	30424.4	35800.2	35799.6	35802.4	35784.2		BDI	Africa	y2025	5375.81	5375.26	5378.02	5359.85
RWA	Africa	y2025	35668.5	37916.1	37915.5	37918.4	37899.2		RWA	Africa	y2025	2247.59	2247	2249.92	2230.68
TZA	Africa	y2025	159773	179301	179298	179312	179221		TZA	Africa	y2025	19527.1	19524.4	19538.2	19447.2
UGA	Africa	y2025	124543	136019	136017	136027	135958		UGA	Africa	y2025	11476.1	11474	11484.5	11415.5
MOZ	Africa	y2025	87218.9	93599.7	93598.3	93605.5	93558		MOZ	Africa	y2025	6380.83	6379.39	6386.59	6339.08
SWZ	Africa	y2025	2942.85	3184.33	3184.28	3184.53	3182.91		SWZ	Africa	y2025	241.487	241.438	241.683	240.067
MWI	Africa	y2025	53504	56850.9	56850	56854.4	56825.5		MWI	Africa	y2025	3346.85	3345.97	3350.34	3321.49
ETH	Africa	y2025	298643	337481	337475	337501	337330		ETH	Africa	y2025	38838	38832.8	38858.8	38687.5
EGY	Africa	y2025	407424	344533	344222	344305	344861		EGY	Africa	y2025	-62890.8	-63201.4	-63118.7	-62562.3
KEN	Africa	y2025	141838	156014	156011	156023	155944		KEN	Africa	y2025	14176.1	14173.7	14185.7	14106.5
ERI	Africa	y2025	8312.93	8359.85	8359.72	8360.37	8356.12		ERI	Africa	y2025	46.9198	46.7913	47.4341	43.1915
SOM	Africa	y2025	50046.6	47800.1	47799.3	47803	47778.8		SOM	Africa	y2025	-2246.57	-2247.3	-2243.63	-2267.89
DJI	Africa	y2025	2911.42	2746.92	2746.87	2747.08	2745.69		DJI	Africa	y2025	-164.502	-164.544	-164.333	-165.727
MDG	Africa	y2025	69289.7	81958.9	81957.6	81963.9	81922.3		MDG	Africa	y2025	12669.2	12667.9	12674.2	12632.6
MUS	Africa	y2025	4177.97	3305.43	3305.38	3305.63	3303.95		MUS	Africa	y2025	-872.538	-872.588	-872.334	-874.012
ATF	Asia	y2025	0.765938	0.661814	0.661647	0.661753	0.661736		ATF	Asia	y2025	-0.104124	-0.10429	-0.104185	-0.104201
CHN	Asia	y2025	4.68082e+06	4.60377e+06	4.59722e+06	4.59898e+06	4.59859e+06		CHN	Asia	y2025	-77052.4	-83594.5	-81834.8	-82232.2
IND	Asia	y2025	3.9593e+06	4.02241e+06	4.02484e+06	4.02528e+06	4.02085e+06		IND	Asia	y2025	63110.7	65538.4	65986.3	61550.1
NPL	Asia	y2025	90060.1	89434.6	89412.1	89426.4	89424.2		NPL	Asia	y2025	-625.498	-648.045	-633.754	-635.977
MNG	Asia	y2025	9310.56	9897.35	9894.86	9896.44	9896.19		MNG	Asia	y2025	586.799	584.304	585.885	585.639
MMR	Asia	y2025	150253	159195	159155	159181	159177		MMR	Asia	y2025	8942.32	8902.19	8927.63	8923.67
LAO	Asia	y2025	20576.6	21895.1	21889.6	21893.1	21892.5		LAO	Asia	y2025	1318.46	1312.94	1316.44	1315.9
THA	Asia	y2025	202668	198063	198013	198045	198040		THA	Asia	y2025	-4604.9	-4654.84	-4623.19	-4628.11
KHM	Asia	y2025	47943.4	50145.9	50133.3	50141.3	50140.1		KHM	Asia	y2025	2202.53	2189.89	2197.9	2196.65
VNM	Asia	y2025	299076	284740	284668	284713	284706		VNM	Asia	y2025	-14336.6	-14408.4	-14362.9	-14370
RUS	Europe	y2025	478056	449766	449444	449634	450192		RUS	Europe	y2025	-28290	-28612.3	-28421.8	-27864.5
PRK	Asia	y2025	56045.1	73996.1	73977.5	73989.3	73987.5		PRK	Asia	y2025	17951	17932.4	17944.2	17942.3
GRL	Europe	y2025	195.569	200.952	200.647	200.702	201.067		GRL	Europe	y2025	5.38337	5.07797	5.13329	5.49797
ISL	Europe	y2025	1261.04	1340.53	1338.49	1338.86	1341.29		ISL	Europe	y2025	79.4922	77.4549	77.824	80.2567
ESP	Europe	y2025	153212	159539	159386	159456	159703		ESP	Europe	y2025	6326.57	6174.01	6244.17	6490.89
IRL	Europe	y2025	19072.5	17439.7	17423	17430.7	17457.7		IRL	Europe	y2025	-1632.85	-1649.52	-1641.85	-1614.88
PRT	Europe	y2025	36384	34411.2	34378.3	34393.4	34446.6		PRT	Europe	y2025	-1972.82	-2005.73	-1990.6	-1937.38
GBR	Europe	y2025	234652	232102	231880	231982	232341		GBR	Europe	y2025	-2550.09	-2772.03	-2669.97	-2311.03
FRA	Europe	y2025	244493	231100	230880	230981	231339		FRA	Europe	y2025	-13392	-13613	-13511.4	-13154
BEL	Europe	y2025	43795.3	39683	39645	39662.5	39723.8		BEL	Europe	y2025	-4112.37	-4150.32	-4132.87	-4071.5
NLD	Europe	y2025	56963.8	59682.7	59625.6	59651.9	59744.2		NLD	Europe	y2025	2718.89	2661.82	2688.07	2780.36
NOR	Europe	y2025	19724.2	19963.4	19933.1	19938.6	19974.8		NOR	Europe	y2025	239.212	208.872	214.368	250.596
LUX	Europe	y2025	2367.56	2251.66	2249.51	2250.5	2253.98		LUX	Europe	y2025	-115.899	-118.053	-117.062	-113.58
DEU	Europe	y2025	290733	280003	279735	279858	280291		DEU	Europe	y2025	-10730	-10997.7	-10874.6	-10441.6
CHE	Europe	y2025	30844	31700.1	31651.9	31660.6	31718.2		CHE	Europe	y2025	856.107	807.93	816.657	874.184
ITA	Europe	y2025	214047	199548	199357	199445	199754		ITA	Europe	y2025	-14498.8	-14689.6	-14601.8	-14293.2
DNK	Europe	y2025	20452.9	20114.7	20095.4	20104.3	20135.4		DNK	Europe	y2025	-338.267	-357.501	-348.656	-317.549
AUT	Europe	y2025	33576.3	30421.9	30392.9	30406.2	30453.3		AUT	Europe	y2025	-3154.31	-3183.4	-3170.02	-3122.97
SWE	Europe	y2025	33472.2	36010.7	35976.3	35992.1	36047.8		SWE	Europe	y2025	2538.49	2504.06	2519.89	2575.58
CZE	Europe	y2025	35628.7	36374.3	36339.5	36355.5	36411.7		CZE	Europe	y2025	745.552	710.77	726.766	783.017
HRV	Europe	y2025	11973	13350.8	13338	13343.9	13364.5		HRV	Europe	y2025	1377.79	1365.03	1370.9	1391.54
SVN	Europe	y2025	6693.95	7082.22	7075.45	7078.57	7089.52		SVN	Europe	y2025	388.273	381.501	384.616	395.568
SJM	Europe	y2025	9.14259	9.45118	9.43682	9.43942	9.45657		SJM	Europe	y2025	0.308591	0.294228	0.29683	0.313981
POL	Europe	y2025	130896	127429	127307	127363	127560		POL	Europe	y2025	-3467.8	-3589.65	-3533.61	-3336.55
BIH	Europe	y2025	10202.8	11433.6	11416.2	11419.4	11440.1		BIH	Europe	y2025	1230.82	1213.44	1216.59	1237.34
HUN	Europe	y2025	30467.4	32500.3	32469.2	32483.5	32533.8		HUN	Europe	y2025	2032.94	2001.86	2016.15	2066.41
SVK	Europe	y2025	16074.1	18452.8	18435.1	18443.2	18471.8		SVK	Europe	y2025	2378.65	2361.01	2369.12	2397.66
MNE	Europe	y2025	2199.09	2209.91	2206.55	2207.16	2211.17		MNE	Europe	y2025	10.8246	7.46603	8.07442	12.0848
SRB	Europe	y2025	24073.9	30035.2	29989.6	29997.9	30052.4		SRB	Europe	y2025	5961.33	5915.68	5923.95	5978.46
ALB	Europe	y2025	9066.07	9963.77	9948.63	9951.37	9969.46		ALB	Europe	y2025	897.701	882.558	885.301	903.383
GRC	Europe	y2025	36328.1	35375.1	35341.3	35356.8	35411.5		GRC	Europe	y2025	-953.051	-986.877	-971.321	-916.615
MKD	Europe	y2025	6303.99	7384.61	7373.39	7375.42	7388.82		MKD	Europe	y2025	1080.62	1069.4	1071.43	1084.83
ROU	Europe	y2025	65542.1	63895.1	63834	63862.1	63960.9		ROU	Europe	y2025	-1647.04	-1708.14	-1680.04	-1581.23
LTU	Europe	y2025	9095.75	9057.01	9048.35	9052.33	9066.34		LTU	Europe	y2025	-38.7435	-47.4039	-43.4212	-29.4148
LVA	Europe	y2025	5885.95	6154.13	6148.24	6150.95	6160.47		LVA	Europe	y2025	268.175	262.29	264.996	274.513
FIN	Europe	y2025	18280.4	18828.6	18810.6	18818.9	18848		FIN	Europe	y2025	548.192	530.188	538.467	567.585
EST	Europe	y2025	4434.2	4421.9	4417.67	4419.62	4426.46		EST	Europe	y2025	-12.2937	-16.5219	-14.5775	-7.73916
BGR	Europe	y2025	19145.9	22580.8	22559.2	22569.2	22604.1		BGR	Europe	y2025	3434.9	3413.31	3423.24	3458.16
BLR	Europe	y2025	30012.7	29280.6	29259.6	29272	29308.3		BLR	Europe	y2025	-732.046	-753.031	-740.626	-704.347
TUR	Europe	y2025	332928	308650	308181	308266	308826		TUR	Europe	y2025	-24277.7	-24746.7	-24661.8	-24101.7
MDA	Europe	y2025	7380.54	8085.7	8079.91	8083.33	8093.35		MDA	Europe	y2025	705.166	699.371	702.796	712.815
CYP	Europe	y2025	3377	4220.06	4216.03	4217.88	4224.41		CYP	Europe	y2025	843.065	839.03	840.886	847.412
IRN	Africa	y2025	273136	273752	273505	273571	274013		IRN	Africa	y2025	615.972	369.177	434.871	876.971
UKR	Europe	y2025	135277	134103	134007	134064	134230		UKR	Europe	y2025	-1173.9	-1270.01	-1213.2	-1047.04
GEO	Europe	y2025	10892.1	11465.7	11457.5	11462.3	11476.6		GEO	Europe	y2025	573.579	565.362	570.219	584.426
ARM	Europe	y2025	8722.37	9347.41	9340.71	9344.67	9356.25		ARM	Europe	y2025	625.038	618.339	622.299	633.881
AZE	Europe	y2025	30834.6	32846.3	32822.7	32836.7	32877.4		AZE	Europe	y2025	2011.73	1988.19	2002.11	2042.81
KAZ	Europe	y2025	64863	62074	62029.5	62055.8	62132.7		KAZ	Europe	y2025	-2788.97	-2833.45	-2807.16	-2730.25
TKM	Europe	y2025	19776.8	20213.2	20198.8	20207.3	20232.4		TKM	Europe	y2025	436.421	421.934	430.497	455.542
UZB	Europe	y2025	104829	114352	114270	114319	114460		UZB	Europe	y2025	9523.36	9441.4	9489.85	9631.53
AFG	Asia	y2025	94629.3	122597	122567	122586	122583		AFG	Asia	y2025	27968.1	27937.2	27956.8	27953.8
TJK	Europe	y2025	24677.7	33162	33138.2	33152.3	33193.4		TJK	Europe	y2025	8484.31	8460.54	8474.59	8515.68
KGZ	Europe	y2025	20664.7	22226.8	22210.9	22220.3	22247.9		KGZ	Europe	y2025	1562.15	1546.22	1555.63	1583.17
MEX	Latin America	y2025	428696	411455	411334	411403	411466		MEX	Latin America	y2025	-17241.6	-17362	-17293	-17230.8
USA	North America	y2025	1.25253e+06	1.22168e+06	1.22116e+06	1.22268e+06	1.21917e+06		USA	North America	y2025	-30849.9	-31374.9	-29847.3	-33356.3
GTM	Latin America	y2025	49593.9	56031.7	56015.3	56024.7	56033.2		GTM	Latin America	y2025	6437.83	6421.43	6430.83	6439.3
ECU	Latin America	y2025	46760.2	56999.7	56983	56992.6	57001.2		ECU	Latin America	y2025	10239.5	10222.8	10232.4	10241
SLV	Latin America	y2025	17744.4	20205	20199.1	20202.5	20205.6		SLV	Latin America	y2025	2460.68	2454.77	2458.16	2461.21
HND	Latin America	y2025	29756.8	32517.8	32508.3	32513.8	32518.7		HND	Latin America	y2025	2760.99	2751.47	2756.93	2761.85
BLZ	Latin America	y2025	1268.53	1318.97	1318.59	1318.81	1319.01		BLZ	Latin America	y2025	50.4398	50.0538	50.275	50.4745
NIC	Latin America	y2025	18931.9	21313.1	21306.8	21310.4	21313.6		NIC	Latin America	y2025	2381.16	2374.92	2378.5	2381.72
CRI	Latin America	y2025	15827.9	16126.2	16121.5	16124.2	16126.6		CRI	Latin America	y2025	298.297	293.578	296.282	298.721
CUB	Latin America	y2025	36585.6	34236.3	34226.3	34232.1	34237.2		CUB	Latin America	y2025	-2349.23	-2359.25	-2353.51	-2348.33
PAN	Latin America	y2025	12874.8	14099.5	14095.4	14097.8	14099.9		PAN	Latin America	y2025	1224.75	1220.63	1222.99	1225.12
PER	Latin America	y2025	96577.4	104980	104950	104967	104983		PER	Latin America	y2025	8403.05	8372.33	8389.93	8405.81
COL	Latin America	y2025	146071	158175	158129	158155	158179		COL	Latin America	y2025	12103.9	12057.6	12084.2	12108.1
BHS	Latin America	y2025	1076.56	1251.06	1250.69	1250.9	1251.09		BHS	Latin America	y2025	174.5	174.134	174.344	174.533
JAM	Latin America	y2025	8514.11	9170.64	9167.95	9169.49	9170.88		JAM	Latin America	y2025	656.529	653.845	655.383	656.77
CHL	Latin America	y2025	57960.6	58520.8	58503.7	58513.5	58522.4		CHL	Latin America	y2025	560.237	543.113	552.926	561.777
HTI	Latin America	y2025	27301.1	36766.5	36755.7	36761.9	36767.4		HTI	Latin America	y2025	9465.34	9454.59	9460.75	9466.31
BRA	Latin America	y2025	726847	666136	665941	666053	666154		BRA	Latin America	y2025	-60710.8	-60905.8	-60794.1	-60693.3
ARG	Latin America	y2025	151910	144069	144027	144051	144073		ARG	Latin America	y2025	-7840.65	-7882.81	-7858.65	-7836.86
VEN	Latin America	y2025	88131.5	95747	95719	95735	95749.5		VEN	Latin America	y2025	7615.5	7587.48	7603.54	7618.02
DOM	Latin America	y2025	31251.1	34507.9	34497.8	34503.6	34508.8		DOM	Latin America	y2025	3256.79	3246.69	3252.48	3257.7
BOL	Latin America	y2025	29891.7	37920.8	37909.7	37916	37921.8		BOL	Latin America	y2025	8029.05	8017.95	8024.31	8030.05
PRY	Latin America	y2025	20728.1	22985.8	22979.1	22982.9	22986.4		PRY	Latin America	y2025	2257.69	2250.97	2254.82	2258.3
TTO	Latin America	y2025	4001.41	4299.28	4298.03	4298.75	4299.4		TTO	Latin America	y2025	297.872	296.614	297.335	297.985
FLK	Latin America	y2025	12.4804	10.8487	10.8456	10.8474	10.849		FLK	Latin America	y2025	-1.63165	-1.63482	-1.633	-1.63136
GUY	Latin America	y2025	2543.06	2447.22	2446.5	2446.91	2447.28		GUY	Latin America	y2025	-95.8395	-96.5556	-96.1452	-95.7751
URY	Latin America	y2025	10926.8	10723.5	10720.3	10722.1	10723.7		URY	Latin America	y2025	-203.336	-206.474	-204.676	-203.054
SUR	Latin America	y2025	1724.87	1857.4	1856.86	1857.17	1857.45		SUR	Latin America	y2025	132.538	131.994	132.305	132.586
GUF	Latin America	y2025	963.562	908.673	908.407	908.559	908.697		GUF	Latin America	y2025	-54.8891	-55.155	-55.0026	-54.8652
SGS	Latin America	y2025	0.397722	0.352805	0.352701	0.352761	0.352814		SGS	Latin America	y2025	-0.0449171	-0.0450204	-0.0449612	-0.0449078
MAR	Africa	y2025	133028	120292	120184	120213	120407		MAR	Africa	y2025	-12735.7	-12844.1	-12815.2	-12621
TUN	Africa	y2025	41615.8	38073	38038.7	38047.8	38109.3		TUN	Africa	y2025	-3542.8	-3577.12	-3567.99	-3506.5
SAU	Africa	y2025	120893	114863	114760	114787	114973		SAU	Africa	y2025	-6029.66	-6133.21	-6105.64	-5920.14
ISR	Africa	y2025	35962.5	30582.2	30554.6	30562	30611.4		ISR	Africa	y2025	-5380.27	-5407.84	-5400.5	-5351.12
JOR	Africa	y2025	33620.9	31885.7	31857	31864.6	31916.1		JOR	Africa	y2025	-1735.16	-1763.91	-1756.25	-1704.76
LBN	Africa	y2025	19732.8	19727.7	19709.9	19714.7	19746.5		LBN	Africa	y2025	-5.0768	-22.8618	-18.1277	13.7318
SYR	Africa	y2025	64878.2	71114.2	71050.1	71067.2	71182		SYR	Africa	y2025	6236	6171.89	6188.96	6303.81
IRQ	Africa	y2025	121653	139343	139218	139251	139476		IRQ	Africa	y2025	17690.1	17564.5	17598	17823
YEM	Africa	y2025	70522.7	102193	102101	102125	102290		YEM	Africa	y2025	31670	31577.8	31602.4	31767.4
KWT	Africa	y2025	16093.4	13930.8	13918.3	13921.6	13944.1		KWT	Africa	y2025	-2162.6	-2175.16	-2171.82	-2149.32
QAT	Africa	y2025	11899.1	9627.64	9618.96	9621.27	9636.82		QAT	Africa	y2025	-2271.47	-2280.15	-2277.84	-2262.29
OMN	Africa	y2025	17794.9	17184.2	17168.7	17172.9	17200.6		OMN	Africa	y2025	-610.65	-626.142	-622.018	-594.266
ARE	Africa	y2025	32552.8	31837.3	31808.6	31816.2	31867.6		ARE	Africa	y2025	-715.505	-744.207	-736.567	-685.151
PAK	Asia	y2025	633785	682188	682016	682125	682108		PAK	Asia	y2025	48402.8	48230.8	48339.8	48322.8
CAN	North America	y2025	136285	131067	130968	131127	131021		CAN	North America	y2025	-5217.98	-5317.29	-5158.62	-5263.87
PRI	Latin America	y2025	11036.7	10006.8	10003.9	10005.5	10007		PRI	Latin America	y2025	-1029.94	-1032.87	-1031.19	-1029.67
AUS	Oceania	y2025	87834.2	89581.7	89513.9	89622.3	89550.4		AUS	Oceania	y2025	1747.56	1679.68	1788.12	1716.19
JPN	Asia	y2025	338559	343446	342940	343062	343746		JPN	Asia	y2025	4887.45	4380.85	4502.58	5187.48
NZL	Oceania	y2025	16775.2	17460.3	17447.1	17468.2	17454.2		NZL	Oceania	y2025	685.157	671.926	693.063	679.042
IDN	Asia	y2025	825271	808510	808307	808436	808416		IDN	Asia	y2025	-16760.7	-16964.5	-16835.3	-16855.4
MYS	Asia	y2025	105149	96737.7	96713.3	96728.8	96726.4		MYS	Asia	y2025	-8411.08	-8435.47	-8420.01	-8422.42
SGP	Asia	y2025	20827.7	16633.7	16629.5	16632.1	16631.7		SGP	Asia	y2025	-4193.99	-4198.18	-4195.52	-4195.94
BRN	Asia	y2025	1375.15	1285.86	1285.53	1285.74	1285.71		BRN	Asia	y2025	-89.298	-89.6221	-89.4167	-89.4486
PHL	Asia	y2025	334277	329029	328946	328999	328990		PHL	Asia	y2025	-5248.44	-5331.39	-5278.82	-5287
TLS	Asia	y2025	3177.19	4076.68	4075.65	4076.3	4076.2		TLS	Asia	y2025	899.495	898.467	899.119	899.017
KOR	Asia	y2025	172817	145759	145722	145745	145741		KOR	Asia	y2025	-27058.7	-27095.4	-27072.2	-27075.8
PNG	Asia	y2025	25082.8	27650.1	27643.1	27647.5	27646.8		PNG	Asia	y2025	2567.27	2560.29	2564.71	2564.03
SLB	Asia	y2025	2028.31	2176.8	2176.25	2176.6	2176.54		SLB	Asia	y2025	148.484	147.936	148.283	148.229
NCL	Asia	y2025	825.232	800.356	800.154	800.282	800.262		NCL	Asia	y2025	-24.8763	-25.0781	-24.9502	-24.9701
VUT	Asia	y2025	1016.9	969.484	969.24	969.395	969.371		VUT	Asia	y2025	-47.4165	-47.6609	-47.506	-47.5301
FJI	Asia	y2025	2823.66	2620.63	2619.97	2620.39	2620.32		FJI	Asia	y2025	-203.029	-203.69	-203.271	-203.336
REU	Africa	y2025	2947.79	2328.94	2328.91	2329.09	2327.91		REU	Africa	y2025	-618.849	-618.884	-618.705	-619.887
LKA	Asia	y2025	58896	62806	62790.2	62800.2	62798.6		LKA	Asia	y2025	3910.02	3894.18	3904.22	3902.66
BGD	Asia	y2025	476426	485517	485394	485472	485460		BGD	Asia	y2025	9090.65	8968.24	9045.82	9033.75
BTN	Asia	y2025	2505.33	2283.05	2282.47	2282.84	2282.78		BTN	Asia	y2025	-222.283	-222.859	-222.494	-222.551
SEN	Africa	y2030	57293.3	57426.3	57435.2	57439	57374.7		SEN	Africa	y2030	132.919	141.832	145.651	81.3548
GMB	Africa	y2030	8951.24	8363.9	8365.2	8365.75	8356.39		GMB	Africa	y2030	-587.345	-586.047	-585.49	-594.855
MRT	Africa	y2030	17768.7	15739	15741.5	15742.5	15724.9		MRT	Africa	y2030	-2029.62	-2027.17	-2026.13	-2043.75
ESH	Africa	y2030	1767.54	1994	1991.17	1991.88	1996.93		ESH	Africa	y2030	226.453	223.624	224.341	229.386
GNB	Africa	y2030	6175.48	6483.01	6484.02	6484.45	6477.19		GNB	Africa	y2030	307.539	308.545	308.976	301.718
GIN	Africa	y2030	48792.7	44866.6	44873.5	44876.5	44826.3		GIN	Africa	y2030	-3926.13	-3919.17	-3916.18	-3966.42
SLE	Africa	y2030	24333.6	25959.7	25963.8	25965.5	25936.4		SLE	Africa	y2030	1626.18	1630.21	1631.93	1602.87
MLI	Africa	y2030	79568.1	71567.5	71578.6	71583.4	71503.2		MLI	Africa	y2030	-8000.58	-7989.48	-7984.72	-8064.85
LBR	Africa	y2030	15183.4	17045.6	17048.2	17049.3	17030.3		LBR	Africa	y2030	1862.2	1864.84	1865.98	1846.89
CIV	Africa	y2030	102112	88821.5	88835.3	88841.2	88741.7		CIV	Africa	y2030	-13290.2	-13276.4	-13270.5	-13369.9
BFA	Africa	y2030	79071.2	73164.7	73176.1	73180.9	73099		BFA	Africa	y2030	-5906.48	-5895.12	-5890.26	-5972.18
GHA	Africa	y2030	127282	101697	101713	101720	101606		GHA	Africa	y2030	-25584.8	-25569.1	-25562.3	-25676.2
TGO	Africa	y2030	26788.9	27558.7	27562.9	27564.8	27533.9		TGO	Africa	y2030	769.764	774.041	775.874	745.018
NER	Africa	y2030	94264.1	93001.7	93016.1	93022.3	92918.2		NER	Africa	y2030	-1262.47	-1248.04	-1241.85	-1345.98
BEN	Africa	y2030	43725.6	41616.8	41623.2	41626	41579.4		BEN	Africa	y2030	-2108.82	-2102.36	-2099.59	-2146.19
DZA	Africa	y2030	159565	153447	153229	153284	153672		DZA	Africa	y2030	-6118.28	-6336.03	-6280.85	-5892.57
NGA	Africa	y2030	743954	707061	707170	707217	706426		NGA	Africa	y2030	-36893.1	-36783.4	-36736.4	-37528
CMR	Africa	y2030	91782.5	89109.2	89123.1	89129	89029.2		CMR	Africa	y2030	-2673.28	-2659.46	-2653.53	-2753.3
GAB	Africa	y2030	7823.54	7291.87	7293.01	7293.49	7285.33		GAB	Africa	y2030	-531.667	-530.535	-530.05	-538.214
GNQ	Africa	y2030	5584.71	4916.17	4916.93	4917.26	4911.75		GNQ	Africa	y2030	-668.543	-667.78	-667.453	-672.958
NAM	Africa	y2030	6551.35	8074.72	8075.98	8076.51	8067.47		NAM	Africa	y2030	1523.38	1524.63	1525.17	1516.13
AGO	Africa	y2030	105403	117949	117968	117976	117843		AGO	Africa	y2030	12546.6	12564.9	12572.8	12440.7
COG	Africa	y2030	15267.4	18651	18653.9	18655.2	18634.3		COG	Africa	y2030	3383.63	3386.52	3387.76	3366.88
COD	Africa	y2030	267629	318615	318664	318685	318328		COD	Africa	y2030	50985.6	51035	51056.2	50699.5
LBY	Africa	y2030	25891.9	23454.9	23421.6	23430	23489.4		LBY	Africa	y2030	-2437.05	-2470.33	-2461.9	-2402.55
TCD	Africa	y2030	45940.1	57971.8	57980.8	57984.6	57919.7		TCD	Africa	y2030	12031.6	12040.6	12044.5	11979.6
CAF	Africa	y2030	13239.3	15611.1	15613.5	15614.6	15597.1		CAF	Africa	y2030	2371.84	2374.26	2375.3	2357.82
ZAF	Africa	y2030	204021	177495	177522	177534	177335		ZAF	Africa	y2030	-26526.2	-26498.6	-26486.8	-26685.6
BWA	Africa	y2030	6589.72	7387.61	7388.75	7389.25	7380.97		BWA	Africa	y2030	797.89	799.037	799.528	791.257
ZMB	Africa	y2030	49267.8	65324.8	65335	65339.3	65266.2		ZMB	Africa	y2030	16057	16067.1	16071.5	15998.4
SDN	Africa	y2030	138704	167110	166873	166933	167356		SDN	Africa	y2030	28406.7	28169.5	28229.6	28652.5
ZWE	Africa	y2030	40539.2	46993.1	47000.4	47003.5	46950.9		ZWE	Africa	y2030	6453.95	6461.24	6464.37	6411.75
LSO	Africa	y2030	6308.71	6246.51	6247.48	6247.89	6240.9		LSO	Africa	y2030	-62.2081	-61.2386	-60.8231	-67.817
BDI	Africa	y2030	34516.6	40785.1	40791.4	40794.2	40748.5		BDI	Africa	y2030	6268.49	6274.82	6277.53	6231.87
RWA	Africa	y2030	41028.1	43776.8	43783.6	43786.6	43737.5		RWA	Africa	y2030	2748.78	2755.57	2758.48	2709.47
TZA	Africa	y2030	187603	211433	211466	211480	211244		TZA	Africa	y2030	23830	23862.8	23876.9	23640.2
UGA	Africa	y2030	148049	162667	162693	162703	162521		UGA	Africa	y2030	14618.8	14644.1	14654.9	14472.8
MOZ	Africa	y2030	100964	107991	108007	108015	107894		MOZ	Africa	y2030	7026.5	7043.26	7050.44	6929.53
SWZ	Africa	y2030	3157.28	3493.58	3494.12	3494.36	3490.45		SWZ	Africa	y2030	336.306	336.848	337.08	333.169
MWI	Africa	y2030	62833.7	67661.8	67672.3	67676.8	67601		MWI	Africa	y2030	4828.05	4838.55	4843.05	4767.3
ETH	Africa	y2030	341673	389045	389106	389131	388696		ETH	Africa	y2030	47372	47432.4	47458.2	47022.6
EGY	Africa	y2030	441559	368260	367738	367870	368802		EGY	Africa	y2030	-73298.4	-73821	-73688.5	-72756.7
KEN	Africa	y2030	162236	179756	179784	179796	179595		KEN	Africa	y2030	17520.2	17548.1	17560	17358.8
ERI	Africa	y2030	9035.25	9300.07	9301.51	9302.13	9291.72		ERI	Africa	y2030	264.818	266.261	266.88	256.467
SOM	Africa	y2030	57168.8	56352.9	56361.6	56365.4	56302.3		SOM	Africa	y2030	-815.922	-807.176	-803.428	-866.522
DJI	Africa	y2030	3201.99	3075.95	3076.43	3076.63	3073.19		DJI	Africa	y2030	-126.046	-125.569	-125.364	-128.808
MDG	Africa	y2030	79075.2	94741.8	94756.5	94762.8	94656.8		MDG	Africa	y2030	15666.6	15681.3	15687.6	15581.5
MUS	Africa	y2030	4171.52	3417.78	3418.31	3418.54	3414.71		MUS	Africa	y2030	-753.736	-753.206	-752.978	-756.805
ATF	Asia	y2030	0.76911	0.680705	0.680512	0.680649	0.680375		ATF	Asia	y2030	-0.0884045	-0.088598	-0.0884611	-0.0887349
CHN	Asia	y2030	4.72209e+06	4.56089e+06	4.55068e+06	4.55336e+06	4.55228e+06		CHN	Asia	y2030	-161201	-171409	-168733	-169809
IND	Asia	y2030	4.22541e+06	4.32454e+06	4.32949e+06	4.33002e+06	4.32087e+06		IND	Asia	y2030	99126.7	104075	104601	95457.1
NPL	Asia	y2030	97187.7	96724.4	96696.9	96716.4	96677.5		NPL	Asia	y2030	-463.324	-490.822	-471.372	-510.272
MNG	Asia	y2030	10004.6	10578.2	10575.2	10577.3	10573		MNG	Asia	y2030	573.617	570.609	572.737	568.482
MMR	Asia	y2030	156447	166751	166703	166737	166670		MMR	Asia	y2030	10303.3	10255.9	10289.4	10222.4
LAO	Asia	y2030	22293.5	23616	23609.3	23614.1	23604.6		LAO	Asia	y2030	1322.58	1315.86	1320.61	1311.11
THA	Asia	y2030	205479	203093	203035	203076	202994		THA	Asia	y2030	-2386.04	-2443.78	-2402.94	-2484.62
KHM	Asia	y2030	52377.9	54235.3	54219.9	54230.8	54209		KHM	Asia	y2030	1857.43	1842.02	1852.92	1831.11
VNM	Asia	y2030	313377	299242	299157	299217	299097		VNM	Asia	y2030	-14134.9	-14220	-14159.8	-14280.2
RUS	Europe	y2030	480846	445421	444989	445284	446050		RUS	Europe	y2030	-35424.5	-35856.8	-35561.5	-34795.8
PRK	Asia	y2030	56415.4	76242.1	76220.5	76235.8	76205.1		PRK	Asia	y2030	19826.7	19805.1	19820.4	19789.7
GRL	Europe	y2030	196.107	195.389	194.909	194.993	195.545		GRL	Europe	y2030	-0.717569	-1.19792	-1.11391	-0.561399
ISL	Europe	y2030	1301.79	1342.14	1338.84	1339.42	1343.21		ISL	Europe	y2030	40.3514	37.0519	37.6289	41.4241
ESP	Europe	y2030	153736	156734	156496	156607	156985		ESP	Europe	y2030	2997.94	2760.77	2871.1	3249.26
IRL	Europe	y2030	19577.5	17504.6	17478.1	17490.4	17532.6		IRL	Europe	y2030	-2072.97	-2099.46	-2087.14	-2044.9
PRT	Europe	y2030	35661.2	33031.6	32981.6	33004.8	33084.5		PRT	Europe	y2030	-2629.64	-2679.62	-2656.37	-2576.67
GBR	Europe	y2030	239804	231969	231618	231782	232341		GBR	Europe	y2030	-7834.32	-8185.34	-8022.04	-7462.36
FRA	Europe	y2030	250066	231007	230657	230820	231377		FRA	Europe	y2030	-19059.2	-19408.8	-19246.1	-18688.8
BEL	Europe	y2030	44605.7	39529.5	39469.7	39497.6	39592.9		BEL	Europe	y2030	-5076.18	-5136	-5108.17	-5012.8
NLD	Europe	y2030	57615.4	59296.2	59206.4	59248.2	59391.2		NLD	Europe	y2030	1680.8	1591.08	1632.82	1775.88
NOR	Europe	y2030	20362.1	20101.1	20051.7	20060.3	20117.2		NOR	Europe	y2030	-261	-310.417	-301.775	-244.934
LUX	Europe	y2030	2476.74	2320.57	2317.06	2318.69	2324.29		LUX	Europe	y2030	-156.167	-159.679	-158.045	-152.446
DEU	Europe	y2030	289442	273826	273411	273604	274265		DEU	Europe	y2030	-15616.2	-16030.5	-15837.8	-15177.1
CHE	Europe	y2030	31663.8	31729.2	31651.2	31664.8	31754.5		CHE	Europe	y2030	65.4001	-12.6037	1.03781	90.7605
ITA	Europe	y2030	211924	193625	193332	193468	193935		ITA	Europe	y2030	-18299	-18592	-18455.7	-17988.5
DNK	Europe	y2030	20737.7	20071	20040.6	20054.8	20103.2		DNK	Europe	y2030	-666.755	-697.127	-682.997	-634.572
AUT	Europe	y2030	33929.3	30162.5	30116.8	30138.1	30210.9		AUT	Europe	y2030	-3766.85	-3812.49	-3791.26	-3718.48
SWE	Europe	y2030	34446.8	36250.5	36195.6	36221.1	36308.6		SWE	Europe	y2030	1803.67	1748.82	1774.33	1861.8
CZE	Europe	y2030	35676	35384.8	35331.3	35356.2	35441.6		CZE	Europe	y2030	-291.154	-344.699	-319.79	-234.416
HRV	Europe	y2030	11753.8	12766.2	12746.9	12755.9	12786.7		HRV	Europe	y2030	1012.38	993.065	1002.05	1032.85
SVN	Europe	y2030	6741.13	6942.5	6931.99	6936.88	6953.63		SVN	Europe	y2030	201.362	190.857	195.744	212.494
SJM	Europe	y2030	9.15726	9.19433	9.17172	9.17568	9.20168		SJM	Europe	y2030	0.0370715	0.014468	0.0184209	0.0444203
POL	Europe	y2030	129806	123115	122929	123016	123313		POL	Europe	y2030	-6690.63	-6876.92	-6790.26	-6493.21
BIH	Europe	y2030	9782.42	10525.6	10499.7	10504.3	10534		BIH	Europe	y2030	743.196	717.319	721.845	751.609
HUN	Europe	y2030	30020	31243.7	31196.4	31218.4	31293.8		HUN	Europe	y2030	1223.68	1176.4	1198.4	1273.78
SVK	Europe	y2030	16068.9	17920.6	17893.5	17906.1	17949.3		SVK	Europe	y2030	1851.7	1824.58	1837.19	1880.43
MNE	Europe	y2030	2212.36	2142.69	2137.42	2138.34	2144.4		MNE	Europe	y2030	-69.6773	-74.945	-74.0238	-67.9647
SRB	Europe	y2030	23573.8	28432.1	28362.2	28374.4	28454.8		SRB	Europe	y2030	4858.33	4788.44	4800.66	4881.06
ALB	Europe	y2030	8876.02	9418.61	9395.45	9399.5	9426.13		ALB	Europe	y2030	542.582	519.427	523.477	550.11
GRC	Europe	y2030	36268.6	34444.7	34392.5	34416.8	34499.9		GRC	Europe	y2030	-1823.91	-1876.03	-1851.79	-1768.68
MKD	Europe	y2030	6273.46	7053.8	7036.46	7039.49	7059.44		MKD	Europe	y2030	780.338	762.996	766.029	785.975
ROU	Europe	y2030	63489	60354.3	60263	60305.5	60451.1		ROU	Europe	y2030	-3134.64	-3225.97	-3183.48	-3037.86
LTU	Europe	y2030	8852.96	8575.13	8562.15	8568.19	8588.88		LTU	Europe	y2030	-277.826	-290.802	-284.765	-264.076
LVA	Europe	y2030	5758.38	5830.95	5822.13	5826.23	5840.3		LVA	Europe	y2030	72.5731	63.7496	67.8544	81.9228
FIN	Europe	y2030	18404.3	18552.1	18524	18537.1	18581.9		FIN	Europe	y2030	147.805	119.732	132.792	177.553
EST	Europe	y2030	4428.86	4277.57	4271.1	4274.11	4284.43		EST	Europe	y2030	-151.284	-157.757	-154.746	-144.425
BGR	Europe	y2030	18488.3	21082.5	21050.6	21065.4	21116.3		BGR	Europe	y2030	2594.12	2562.22	2577.06	2627.93
BLR	Europe	y2030	30035.7	28911.7	28883.7	28902.8	28952.5		BLR	Europe	y2030	-1124.02	-1152.08	-1132.92	-1083.21
TUR	Europe	y2030	346843	310548	309784	309918	310796		TUR	Europe	y2030	-36295.1	-37058.5	-36925	-36046.9
MDA	Europe	y2030	7387.5	7963.19	7955.46	7960.74	7974.43		MDA	Europe	y2030	575.69	567.961	573.24	586.93
CYP	Europe	y2030	3488.81	4260.57	4254.12	4257.12	4267.4		CYP	Europe	y2030	771.763	765.316	768.315	778.595
IRN	Africa	y2030	287589	283871	283469	283571	284289		IRN	Africa	y2030	-3717.74	-4120.58	-4018.49	-3300.18
UKR	Europe	y2030	134460	130869	130742	130828	131053		UKR	Europe	y2030	-3591.43	-3718.45	-3631.69	-3406.71
GEO	Europe	y2030	10563.7	10953.6	10943	10950.3	10969.1		GEO	Europe	y2030	389.928	379.296	386.558	405.389
ARM	Europe	y2030	8655.66	9188.66	9179.75	9185.84	9201.63		ARM	Europe	y2030	533.002	524.084	530.175	545.972
AZE	Europe	y2030	31999	33557.1	33524.5	33546.8	33604.5		AZE	Europe	y2030	1558.12	1525.55	1547.8	1605.49
KAZ	Europe	y2030	67094.6	63391.8	63330.3	63372.3	63481.3		KAZ	Europe	y2030	-3702.83	-3764.36	-3722.33	-3613.35
TKM	Europe	y2030	21268	21306.8	21286.1	21300.3	21336.9		TKM	Europe	y2030	38.7789	18.0986	32.2234	68.8531
UZB	Europe	y2030	112140	120156	120040	120119	120326		UZB	Europe	y2030	8016.41	7899.79	7979.45	8186.01
AFG	Asia	y2030	109763	142517	142476	142505	142448		AFG	Asia	y2030	32753.6	32713.1	32741.8	32684.4
TJK	Europe	y2030	27559.8	35662.8	35628.2	35651.8	35713.2		TJK	Europe	y2030	8103.04	8068.43	8092.07	8153.38
KGZ	Europe	y2030	22335.1	23396	23373.3	23388.8	23429		KGZ	Europe	y2030	1060.95	1038.24	1053.75	1093.97
MEX	Latin America	y2030	451587	430107	429962	430065	430061		MEX	Latin America	y2030	-21479.9	-21625	-21522.1	-21526.4
USA	North America	y2030	1.29281e+06	1.2256e+06	1.22482e+06	1.22731e+06	1.22139e+06		USA	North America	y2030	-67203.3	-67982.8	-65490.6	-71411.9
GTM	Latin America	y2030	54418.4	60480.3	60459.9	60474.4	60473.8		GTM	Latin America	y2030	6061.96	6041.55	6056.02	6055.42
ECU	Latin America	y2030	50125.5	60283.7	60263.4	60277.8	60277.2		ECU	Latin America	y2030	10158.2	10137.8	10152.2	10151.6
SLV	Latin America	y2030	18305.9	20553.6	20546.7	20551.6	20551.4		SLV	Latin America	y2030	2247.71	2240.77	2245.69	2245.48
HND	Latin America	y2030	32626.8	34837.3	34825.5	34833.9	34833.5		HND	Latin America	y2030	2210.5	2198.74	2207.07	2206.73
BLZ	Latin America	y2030	1376.64	1412.83	1412.35	1412.69	1412.68		BLZ	Latin America	y2030	36.1917	35.7148	36.0528	36.0389
NIC	Latin America	y2030	20247.6	22299	22291.5	22296.8	22296.6		NIC	Latin America	y2030	2051.44	2043.91	2049.24	2049.02
CRI	Latin America	y2030	16544.3	16754.1	16748.4	16752.4	16752.2		CRI	Latin America	y2030	209.711	204.056	208.064	207.899
CUB	Latin America	y2030	35979.8	33686.7	33675.3	33683.4	33683		CUB	Latin America	y2030	-2293.14	-2304.51	-2296.45	-2296.79
PAN	Latin America	y2030	13752.7	14908.6	14903.6	14907.2	14907		PAN	Latin America	y2030	1155.91	1150.88	1154.45	1154.3
PER	Latin America	y2030	102491	109579	109542	109568	109567		PER	Latin America	y2030	7087.44	7050.45	7076.66	7075.59
COL	Latin America	y2030	151713	163040	162985	163024	163022		COL	Latin America	y2030	11326.7	11271.7	11310.7	11309.1
BHS	Latin America	y2030	1123.41	1306.23	1305.79	1306.1	1306.09		BHS	Latin America	y2030	182.819	182.378	182.691	182.678
JAM	Latin America	y2030	8591.02	9193.99	9190.88	9193.08	9192.99		JAM	Latin America	y2030	602.961	599.857	602.057	601.967
CHL	Latin America	y2030	59572.9	59735.8	59715.7	59730	59729.4		CHL	Latin America	y2030	162.97	142.805	157.096	156.509
HTI	Latin America	y2030	29448.4	38492.5	38479.5	38488.7	38488.4		HTI	Latin America	y2030	9044.1	9031.11	9040.32	9039.94
BRA	Latin America	y2030	750233	683341	683111	683274	683267		BRA	Latin America	y2030	-66891.9	-67122.6	-66959.1	-66965.8
ARG	Latin America	y2030	159695	149954	149904	149940	149938		ARG	Latin America	y2030	-9740.61	-9791.23	-9755.35	-9756.83
VEN	Latin America	y2030	94243.6	101524	101490	101514	101513		VEN	Latin America	y2030	7280.65	7246.38	7270.67	7269.67
DOM	Latin America	y2030	33024	36084.1	36072	36080.6	36080.2		DOM	Latin America	y2030	3060.11	3047.93	3056.56	3056.21
BOL	Latin America	y2030	32589.1	40270.6	40257	40266.6	40266.2		BOL	Latin America	y2030	7681.46	7667.87	7677.5	7677.11
PRY	Latin America	y2030	22158.1	24244.7	24236.5	24242.3	24242.1		PRY	Latin America	y2030	2086.66	2078.47	2084.27	2084.03
TTO	Latin America	y2030	3951.13	4218.21	4216.78	4217.79	4217.75		TTO	Latin America	y2030	267.074	265.65	266.659	266.617
FLK	Latin America	y2030	12.4291	10.8135	10.8099	10.8125	10.8124		FLK	Latin America	y2030	-1.61559	-1.61924	-1.61665	-1.61676
GUY	Latin America	y2030	2504.13	2402.09	2401.28	2401.85	2401.83		GUY	Latin America	y2030	-102.041	-102.852	-102.277	-102.301
URY	Latin America	y2030	11044.6	10761	10757.4	10760	10759.9		URY	Latin America	y2030	-283.568	-287.2	-284.626	-284.732
SUR	Latin America	y2030	1775.63	1886.77	1886.13	1886.58	1886.56		SUR	Latin America	y2030	111.135	110.499	110.95	110.931
GUF	Latin America	y2030	1035.87	982.578	982.246	982.481	982.472		GUF	Latin America	y2030	-53.2955	-53.6272	-53.3921	-53.4018
SGS	Latin America	y2030	0.398076	0.353941	0.353822	0.353907	0.353903		SGS	Latin America	y2030	-0.0441344	-0.0442539	-0.0441692	-0.0441727
MAR	Africa	y2030	140713	124748	124571	124616	124932		MAR	Africa	y2030	-15964.6	-16141.6	-16096.8	-15781.1
TUN	Africa	y2030	43621.4	39123.1	39067.6	39081.6	39180.6		TUN	Africa	y2030	-4498.33	-4553.85	-4539.78	-4440.79
SAU	Africa	y2030	129044	122610	122436	122481	122791		SAU	Africa	y2030	-6433.61	-6607.61	-6563.51	-6253.26
ISR	Africa	y2030	39154.7	33087.9	33040.9	33052.8	33136.5		ISR	Africa	y2030	-6066.85	-6113.8	-6101.9	-6018.18
JOR	Africa	y2030	37137.5	34598.8	34549.7	34562.2	34649.7		JOR	Africa	y2030	-2538.62	-2587.72	-2575.28	-2487.73
LBN	Africa	y2030	20811	20420.6	20391.6	20398.9	20450.6		LBN	Africa	y2030	-390.48	-419.458	-412.114	-360.442
SYR	Africa	y2030	72946.5	77171	77061.5	77089.3	77284.6		SYR	Africa	y2030	4224.53	4115.02	4142.77	4338.04
IRQ	Africa	y2030	136700	154297	154078	154133	154524		IRQ	Africa	y2030	17597.1	17378.1	17433.6	17824.1
YEM	Africa	y2030	80786.1	113491	113329	113370	113657		YEM	Africa	y2030	32704.4	32543.3	32584.2	32871.3
KWT	Africa	y2030	16990.4	14751	14730.1	14735.4	14772.7		KWT	Africa	y2030	-2239.36	-2260.3	-2254.99	-2217.67
QAT	Africa	y2030	12820.8	10417.5	10402.7	10406.5	10432.8		QAT	Africa	y2030	-2403.26	-2418.05	-2414.3	-2387.94
OMN	Africa	y2030	19182.6	18320.5	18294.5	18301.1	18347.4		OMN	Africa	y2030	-862.086	-888.085	-881.496	-835.138
ARE	Africa	y2030	34673.3	34043.2	33994.9	34007.2	34093.3		ARE	Africa	y2030	-630.043	-678.354	-666.111	-579.968
PAK	Asia	y2030	699383	754219	754005	754157	753853		PAK	Asia	y2030	54836.2	54621.8	54773.4	54470.1
CAN	North America	y2030	141138	133892	133736	133994	133804		CAN	North America	y2030	-7246.75	-7402.29	-7144.83	-7334.34
PRI	Latin America	y2030	10983.6	9952.34	9948.98	9951.36	9951.26		PRI	Latin America	y2030	-1031.26	-1034.62	-1032.24	-1032.33
AUS	Oceania	y2030	92494	92752.7	92644.9	92823.3	92692		AUS	Oceania	y2030	258.719	150.971	329.323	198.04
JPN	Asia	y2030	330830	340464	339501	339727	341043		JPN	Asia	y2030	9633.91	8670.05	8896.63	10212.9
NZL	Oceania	y2030	17407.4	17831.1	17810.4	17844.7	17819.5		NZL	Oceania	y2030	423.716	403.002	437.289	412.05
IDN	Asia	y2030	869230	856820	856576	856748	856404		IDN	Asia	y2030	-12409.9	-12653.5	-12481.2	-12825.8
MYS	Asia	y2030	112326	104995	104965	104986	104944		MYS	Asia	y2030	-7331.58	-7361.43	-7340.31	-7382.54
SGP	Asia	y2030	21633.9	17784.2	17779.2	17782.8	17775.6		SGP	Asia	y2030	-3849.61	-3854.67	-3851.09	-3858.24
BRN	Asia	y2030	1446.27	1380.28	1379.89	1380.17	1379.61		BRN	Asia	y2030	-65.9826	-66.375	-66.0974	-66.6525
PHL	Asia	y2030	360276	356787	356685	356757	356613		PHL	Asia	y2030	-3489.22	-3590.65	-3518.91	-3662.4
TLS	Asia	y2030	3693.94	4638.16	4636.84	4637.77	4635.91		TLS	Asia	y2030	944.223	942.904	943.837	941.972
KOR	Asia	y2030	173320	149540	149497	149527	149467		KOR	Asia	y2030	-23780.6	-23823.1	-23793.1	-23853.2
PNG	Asia	y2030	28071	30480.5	30471.9	30478	30465.7		PNG	Asia	y2030	2409.56	2400.89	2407.02	2394.76
SLB	Asia	y2030	2297.61	2438.54	2437.85	2438.34	2437.36		SLB	Asia	y2030	140.934	140.241	140.731	139.75
NCL	Asia	y2030	862.384	853.458	853.215	853.387	853.043		NCL	Asia	y2030	-8.92688	-9.16951	-8.9979	-9.34113
VUT	Asia	y2030	1141.05	1075.57	1075.26	1075.48	1075.05		VUT	Asia	y2030	-65.4801	-65.7859	-65.5696	-66.0022
FJI	Asia	y2030	2900.41	2719.12	2718.35	2718.89	2717.8		FJI	Asia	y2030	-181.287	-182.061	-181.514	-182.607
REU	Africa	y2030	3019.85	2487.07	2487.46	2487.62	2484.84		REU	Africa	y2030	-532.785	-532.399	-532.234	-535.018
LKA	Asia	y2030	60880.7	65115.5	65097	65110.1	65083.9		LKA	Asia	y2030	4234.86	4216.34	4229.44	4203.25
BGD	Asia	y2030	509365	518474	518327	518431	518223		BGD	Asia	y2030	9109.79	8962.39	9066.65	8858.14
BTN	Asia	y2030	2703.26	2445.03	2444.33	2444.82	2443.84		BTN	Asia	y2030	-258.228	-258.923	-258.431	-259.415
SEN	Africa	y2035	64558.6	65305.1	65315.8	65321.4	65194.9		SEN	Africa	y2035	746.493	757.21	762.801	636.293
GMB	Africa	y2035	10108.8	9452.28	9453.83	9454.64	9436.33		GMB	Africa	y2035	-656.553	-655.001	-654.192	-672.503
MRT	Africa	y2035	19510.6	17612.7	17615.6	17617.1	17583		MRT	Africa	y2035	-1897.91	-1895.02	-1893.51	-1927.63
ESH	Africa	y2035	1949.07	2167.93	2164.59	2165.37	2172.11		ESH	Africa	y2035	218.865	215.523	216.306	223.046
GNB	Africa	y2035	6867.97	7163	7164.17	7164.79	7150.91		GNB	Africa	y2035	295.025	296.2	296.814	282.938
GIN	Africa	y2035	56134	50442.8	50451.1	50455.4	50357.7		GIN	Africa	y2035	-5691.17	-5682.89	-5678.58	-5776.29
SLE	Africa	y2035	27116.9	28930.2	28935	28937.5	28881.4		SLE	Africa	y2035	1813.33	1818.08	1820.56	1764.51
MLI	Africa	y2035	90603.6	82407.9	82421.4	82428.5	82268.9		MLI	Africa	y2035	-8195.72	-8182.2	-8175.14	-8334.78
LBR	Africa	y2035	17246.5	19278.5	19281.6	19283.3	19245.9		LBR	Africa	y2035	2031.99	2035.16	2036.81	1999.46
CIV	Africa	y2035	114162	99255.9	99272.2	99280.7	99088.4		CIV	Africa	y2035	-14906.1	-14889.8	-14881.3	-15073.6
BFA	Africa	y2035	90492.2	84305.1	84318.9	84326.1	84162.8		BFA	Africa	y2035	-6187.15	-6173.32	-6166.1	-6329.42
GHA	Africa	y2035	141595	114002	114020	114030	113809		GHA	Africa	y2035	-27593.1	-27574.4	-27564.6	-27785.5
TGO	Africa	y2035	29640.3	30749.3	30754.4	30757	30697.4		TGO	Africa	y2035	1109.06	1114.1	1116.74	1057.17
NER	Africa	y2035	112242	112651	112669	112679	112461		NER	Africa	y2035	408.971	427.458	437.103	218.877
BEN	Africa	y2035	48998.9	47230.9	47238.7	47242.7	47151.2		BEN	Africa	y2035	-1767.94	-1760.19	-1756.15	-1847.64
DZA	Africa	y2035	166673	158322	158078	158135	158628		DZA	Africa	y2035	-8350.52	-8594.59	-8537.44	-8045.18
NGA	Africa	y2035	845060	816128	816262	816332	814751		NGA	Africa	y2035	-28931.6	-28797.7	-28727.8	-30308.8
CMR	Africa	y2035	102021	99480.6	99496.9	99505.5	99312.7		CMR	Africa	y2035	-2540.79	-2524.47	-2515.95	-2708.66
GAB	Africa	y2035	8480.23	8068.45	8069.77	8070.46	8054.83		GAB	Africa	y2035	-411.788	-410.464	-409.773	-425.403
GNQ	Africa	y2035	6232.81	5552.4	5553.31	5553.78	5543.03		GNQ	Africa	y2035	-680.414	-679.503	-679.027	-689.783
NAM	Africa	y2035	7139.4	8878.96	8880.42	8881.18	8863.98		NAM	Africa	y2035	1739.56	1741.02	1741.78	1724.58
AGO	Africa	y2035	117721	135796	135818	135830	135567		AGO	Africa	y2035	18074.3	18096.6	18108.2	17845.2
COG	Africa	y2035	17488.9	21073.9	21077.4	21079.2	21038.3		COG	Africa	y2035	3585.04	3588.5	3590.3	3549.48
COD	Africa	y2035	311513	367509	367569	367601	366889		COD	Africa	y2035	55995.5	56055.8	56087.3	55375.3
LBY	Africa	y2035	26968.7	24226	24188.7	24197.4	24272.8		LBY	Africa	y2035	-2742.7	-2780.05	-2771.3	-2695.98
TCD	Africa	y2035	53205.9	66799.4	66810.4	66816.1	66686.7		TCD	Africa	y2035	13593.5	13604.5	13610.2	13480.8
CAF	Africa	y2035	14613.8	17172.9	17175.7	17177.2	17143.9		CAF	Africa	y2035	2559.1	2561.92	2563.39	2530.12
ZAF	Africa	y2035	214992	190352	190383	190399	190031		ZAF	Africa	y2035	-24640.5	-24609.3	-24593	-24961.8
BWA	Africa	y2035	7040.8	8021.3	8022.61	8023.3	8007.76		BWA	Africa	y2035	980.498	981.815	982.501	966.963
ZMB	Africa	y2035	57806.4	76207.6	76220.1	76226.7	76079		ZMB	Africa	y2035	18401.2	18413.7	18420.3	18272.6
SDN	Africa	y2035	153520	180094	179817	179882	180442		SDN	Africa	y2035	26574.8	26297.2	26362.2	26922.1
ZWE	Africa	y2035	44289	51822.4	51830.9	51835.3	51734.9		ZWE	Africa	y2035	7533.39	7541.9	7546.34	7445.95
LSO	Africa	y2035	6724.03	6647.1	6648.19	6648.76	6635.88		LSO	Africa	y2035	-76.929	-75.8382	-75.269	-88.1457
BDI	Africa	y2035	38609.4	45190.9	45198.3	45202.2	45114.6		BDI	Africa	y2035	6581.45	6588.86	6592.73	6505.19
RWA	Africa	y2035	46626.7	49898	49906.2	49910.5	49813.8		RWA	Africa	y2035	3271.27	3279.45	3283.73	3187.07
TZA	Africa	y2035	217190	245048	245089	245110	244635		TZA	Africa	y2035	27857.9	27898.1	27919.1	27444.4
UGA	Africa	y2035	175461	192509	192540	192557	192184		UGA	Africa	y2035	17047.6	17079.2	17095.7	16722.7
MOZ	Africa	y2035	114222	121592	121612	121622	121386		MOZ	Africa	y2035	7369.43	7389.38	7399.79	7164.25
SWZ	Africa	y2035	3363.33	3788.23	3788.85	3789.17	3781.83		SWZ	Africa	y2035	424.892	425.514	425.838	418.5
MWI	Africa	y2035	73600.9	79615.1	79628.2	79635	79480.8		MWI	Africa	y2035	6014.24	6027.31	6034.13	5879.9
ETH	Africa	y2035	387769	439534	439606	439644	438792		ETH	Africa	y2035	51765.6	51837.7	51875.3	51023.9
EGY	Africa	y2035	473608	388288	387689	387829	389036		EGY	Africa	y2035	-85320.4	-85919	-85778.8	-84571.6
KEN	Africa	y2035	183414	204399	204433	204450	204054		KEN	Africa	y2035	20984.6	21018.2	21035.7	20639.7
ERI	Africa	y2035	9800.81	10399.6	10401.3	10402.2	10382.1		ERI	Africa	y2035	598.803	600.51	601.4	581.254
SOM	Africa	y2035	63721.7	65089.2	65099.8	65105.4	64979.3		SOM	Africa	y2035	1367.5	1378.18	1383.75	1257.66
DJI	Africa	y2035	3478.98	3405.33	3405.89	3406.18	3399.59		DJI	Africa	y2035	-73.6502	-73.0914	-72.7998	-79.3966
MDG	Africa	y2035	89175	107418	107436	107445	107237		MDG	Africa	y2035	18243.1	18260.7	18269.9	18061.9
MUS	Africa	y2035	4132.27	3488.18	3488.76	3489.06	3482.3		MUS	Africa	y2035	-644.088	-643.515	-643.217	-649.974
ATF	Asia	y2035	0.7617	0.68589	0.685782	0.685897	0.685319		ATF	Asia	y2035	-0.0758098	-0.0759175	-0.0758028	-0.0763808
CHN	Asia	y2035	4.69285e+06	4.44296e+06	4.43199e+06	4.43474e+06	4.43283e+06		CHN	Asia	y2035	-249894	-260862	-258110	-260024
IND	Asia	y2035	4.44458e+06	4.55892e+06	4.56575e+06	4.56605e+06	4.55324e+06		IND	Asia	y2035	114344	121178	121473	108659
NPL	Asia	y2035	103043	102423	102407	102424	102338		NPL	Asia	y2035	-619.988	-636.062	-618.94	-705.249
MNG	Asia	y2035	10539.9	11080.4	11078.6	11080.5	11071.1		MNG	Asia	y2035	540.456	538.717	540.569	531.232
MMR	Asia	y2035	160268	171165	171138	171167	171023		MMR	Asia	y2035	10897.2	10870.3	10898.9	10754.7
LAO	Asia	y2035	23795.7	25009.6	25005.6	25009.8	24988.7		LAO	Asia	y2035	1213.86	1209.93	1214.12	1193.04
THA	Asia	y2035	206429	205062	205030	205065	204892		THA	Asia	y2035	-1366.37	-1398.55	-1364.27	-1537.07
KHM	Asia	y2035	56481.1	57732.8	57723.7	57733.4	57684.7		KHM	Asia	y2035	1251.71	1242.65	1252.3	1203.65
VNM	Asia	y2035	322222	308494	308446	308497	308238		VNM	Asia	y2035	-13727.6	-13776	-13724.4	-13984.4
RUS	Europe	y2035	479891	436226	435786	436080	436775		RUS	Europe	y2035	-43664.6	-44105.2	-43810.5	-43115.5
PRK	Asia	y2035	56103.3	77203.1	77191	77203.9	77138.8		PRK	Asia	y2035	21099.8	21087.7	21100.6	21035.6
GRL	Europe	y2035	194.664	187.563	187.033	187.12	187.691		GRL	Europe	y2035	-7.10102	-7.63089	-7.54379	-6.9726
ISL	Europe	y2035	1340.54	1334.2	1330.43	1331.05	1335.11		ISL	Europe	y2035	-6.34367	-10.1128	-9.49319	-5.43019
ESP	Europe	y2035	154209	154115	153859	153977	154385		ESP	Europe	y2035	-94.6033	-350.871	-231.974	175.402
IRL	Europe	y2035	20007.9	17508	17478.8	17492.4	17538.6		IRL	Europe	y2035	-2499.96	-2529.07	-2515.57	-2469.29
PRT	Europe	y2035	34837.3	31584.9	31532.3	31556.7	31640.2		PRT	Europe	y2035	-3252.42	-3304.95	-3280.58	-3197.09
GBR	Europe	y2035	244948	230916	230532	230710	231320		GBR	Europe	y2035	-14032.8	-14416.8	-14238.6	-13628.2
FRA	Europe	y2035	256323	230961	230577	230755	231366		FRA	Europe	y2035	-25362.1	-25746.2	-25568	-24957.5
BEL	Europe	y2035	45456.8	39284.9	39219.6	39249.9	39353.7		BEL	Europe	y2035	-6171.94	-6237.27	-6206.96	-6103.12
NLD	Europe	y2035	58241.6	58691.5	58593.9	58639.2	58794.3		NLD	Europe	y2035	449.918	352.324	397.603	552.744
NOR	Europe	y2035	20975.1	20064	20007.3	20016.6	20077.7		NOR	Europe	y2035	-911.109	-967.79	-958.473	-897.372
LUX	Europe	y2035	2600.26	2388.47	2384.5	2386.34	2392.65		LUX	Europe	y2035	-211.794	-215.766	-213.923	-207.609
DEU	Europe	y2035	289332	267262	266817	267023	267730		DEU	Europe	y2035	-22070.4	-22514.8	-22308.7	-21602.2
CHE	Europe	y2035	32484	31521.4	31432.3	31447	31543		CHE	Europe	y2035	-962.616	-1051.66	-1037.03	-941.034
ITA	Europe	y2035	209903	187625	187313	187458	187953		ITA	Europe	y2035	-22278	-22589.9	-22445.2	-21949.2
DNK	Europe	y2035	21037.6	19942.9	19909.7	19925.1	19977.8		DNK	Europe	y2035	-1094.7	-1127.86	-1112.47	-1059.76
AUT	Europe	y2035	34315.8	29797	29747.5	29770.5	29849.2		AUT	Europe	y2035	-4518.81	-4568.36	-4545.37	-4466.61
SWE	Europe	y2035	35431	36323.9	36263.5	36291.5	36387.5		SWE	Europe	y2035	892.869	832.469	860.492	956.508
CZE	Europe	y2035	35474.7	34139	34082.2	34108.5	34198.8		CZE	Europe	y2035	-1335.69	-1392.46	-1366.12	-1275.88
HRV	Europe	y2035	11528.5	12180.7	12160.5	12169.9	12202.1		HRV	Europe	y2035	652.215	631.961	641.358	673.556
SVN	Europe	y2035	6773.21	6789.6	6778.31	6783.54	6801.49		SVN	Europe	y2035	16.3885	5.09847	10.3365	28.2837
SJM	Europe	y2035	9.17992	8.92228	8.89707	8.90122	8.92839		SJM	Europe	y2035	-0.257643	-0.282849	-0.278705	-0.251534
POL	Europe	y2035	128035	118058	117861	117952	118265		POL	Europe	y2035	-9977.37	-10173.7	-10082.6	-9770.54
BIH	Europe	y2035	9232.35	9489.23	9462.42	9466.83	9495.73		BIH	Europe	y2035	256.877	230.07	234.477	263.374
HUN	Europe	y2035	29444.8	29886.8	29837.1	29860.2	29939.2		HUN	Europe	y2035	442.04	392.343	415.401	494.401
SVK	Europe	y2035	15956.7	17249	17220.4	17233.7	17279.3		SVK	Europe	y2035	1292.36	1263.68	1276.99	1322.58
MNE	Europe	y2035	2214.75	2061.64	2055.81	2056.77	2063.05		MNE	Europe	y2035	-153.115	-158.939	-157.982	-151.704
SRB	Europe	y2035	22919.8	26743.1	26667.6	26680	26761.4		SRB	Europe	y2035	3823.33	3747.78	3760.2	3841.64
ALB	Europe	y2035	8579.2	8749.33	8724.62	8728.68	8755.32		ALB	Europe	y2035	170.131	145.414	149.477	176.121
GRC	Europe	y2035	36363.4	33660	33604.1	33630	33719		GRC	Europe	y2035	-2703.34	-2759.31	-2733.34	-2644.37
MKD	Europe	y2035	6187.37	6653.67	6634.88	6637.96	6658.23		MKD	Europe	y2035	466.306	447.509	450.599	470.861
ROU	Europe	y2035	60916.4	56491.9	56398	56441.6	56590.9		ROU	Europe	y2035	-4424.47	-4518.4	-4474.82	-4325.5
LTU	Europe	y2035	8601.67	8075.51	8062.08	8068.31	8089.65		LTU	Europe	y2035	-526.164	-539.592	-533.362	-512.016
LVA	Europe	y2035	5638.04	5537.03	5527.83	5532.1	5546.73		LVA	Europe	y2035	-101.011	-110.219	-105.947	-91.3107
FIN	Europe	y2035	18540	18203.2	18172.9	18187	18235.1		FIN	Europe	y2035	-336.796	-367.065	-353.022	-304.905
EST	Europe	y2035	4414.46	4133.28	4126.41	4129.6	4140.52		EST	Europe	y2035	-281.184	-288.057	-284.868	-273.943
BGR	Europe	y2035	17667	19539.5	19507	19522.1	19573.8		BGR	Europe	y2035	1872.55	1840.05	1855.13	1906.78
BLR	Europe	y2035	29884.4	28234.2	28205.7	28224.8	28269.7		BLR	Europe	y2035	-1650.21	-1678.73	-1659.66	-1614.67
TUR	Europe	y2035	359127	309691	308817	308960	309903		TUR	Europe	y2035	-49435.5	-50310.4	-50166.6	-49223.5
MDA	Europe	y2035	7315.84	7733.02	7725.21	7730.44	7742.76		MDA	Europe	y2035	417.186	409.375	414.599	426.919
CYP	Europe	y2035	3589.17	4267.97	4260.87	4264.16	4275.44		CYP	Europe	y2035	678.794	671.697	674.99	686.271
IRN	Africa	y2035	298891	290069	289622	289727	290629		IRN	Africa	y2035	-8821.48	-9268.65	-9163.93	-8262.04
UKR	Europe	y2035	133359	126781	126653	126738	126940		UKR	Europe	y2035	-6577.73	-6705.79	-6620.15	-6418.16
GEO	Europe	y2035	10096.8	10290.8	10280.4	10287.4	10303.8		GEO	Europe	y2035	194.028	183.634	190.585	206.981
ARM	Europe	y2035	8484.54	8875.38	8866.41	8872.41	8886.55		ARM	Europe	y2035	390.842	381.877	387.873	402.013
AZE	Europe	y2035	32572.4	33731.3	33697.3	33720.1	33773.8		AZE	Europe	y2035	1158.91	1124.84	1147.62	1201.36
KAZ	Europe	y2035	68154.7	63447.3	63383.2	63426.1	63527.2		KAZ	Europe	y2035	-4707.37	-4771.46	-4728.6	-4627.51
TKM	Europe	y2035	22522.3	22009	21986.8	22001.7	22036.7		TKM	Europe	y2035	-513.255	-535.486	-520.618	-485.553
UZB	Europe	y2035	118411	124042	123917	124001	124199		UZB	Europe	y2035	5631.96	5506.66	5590.46	5788.08
AFG	Asia	y2035	127869	163670	163645	163672	163534		AFG	Asia	y2035	35801	35775.3	35802.7	35664.7
TJK	Europe	y2035	30305.7	37456.8	37419	37444.3	37504		TJK	Europe	y2035	7151.14	7113.31	7138.61	7198.29
KGZ	Europe	y2035	23846.7	24126.4	24102	24118.3	24156.8		KGZ	Europe	y2035	279.68	255.31	271.608	310.047
MEX	Latin America	y2035	471879	444670	444552	444648	444535		MEX	Latin America	y2035	-27209.1	-27327.1	-27231	-27344.6
USA	North America	y2035	1.33287e+06	1.22306e+06	1.2223e+06	1.22514e+06	1.21804e+06		USA	North America	y2035	-109809	-110565	-107728	-114833
GTM	Latin America	y2035	58898.8	64310.6	64293.5	64307.4	64291		GTM	Latin America	y2035	5411.76	5394.68	5408.6	5392.15
ECU	Latin America	y2035	53277.1	63048.6	63031.9	63045.5	63029.4		ECU	Latin America	y2035	9771.45	9754.72	9768.35	9752.24
SLV	Latin America	y2035	18729.6	20645	20639.5	20644	20638.7		SLV	Latin America	y2035	1915.41	1909.93	1914.4	1909.12
HND	Latin America	y2035	35415.8	36805.2	36795.4	36803.3	36793.9		HND	Latin America	y2035	1389.39	1379.62	1387.58	1378.17
BLZ	Latin America	y2035	1481.68	1491.01	1490.61	1490.93	1490.55		BLZ	Latin America	y2035	9.33116	8.93529	9.25785	8.87665
NIC	Latin America	y2035	21403.4	22988.3	22982.2	22987.2	22981.3		NIC	Latin America	y2035	1584.91	1578.81	1583.78	1577.9
CRI	Latin America	y2035	17164.3	17225.1	17220.5	17224.2	17219.8		CRI	Latin America	y2035	60.8193	56.246	59.9724	55.5685
CUB	Latin America	y2035	35051.1	32732.2	32723.5	32730.6	32722.2		CUB	Latin America	y2035	-2318.93	-2327.62	-2320.54	-2328.91
PAN	Latin America	y2035	14521.4	15571.1	15566.9	15570.3	15566.3		PAN	Latin America	y2035	1049.62	1045.49	1048.86	1044.87
PER	Latin America	y2035	107759	113144	113114	113139	113110		PER	Latin America	y2035	5385.03	5354.99	5379.47	5350.54
COL	Latin America	y2035	156491	166366	166322	166358	166315		COL	Latin America	y2035	9874.69	9830.52	9866.51	9823.98
BHS	Latin America	y2035	1167.11	1350.29	1349.93	1350.23	1349.88		BHS	Latin America	y2035	183.183	182.825	183.117	182.772
JAM	Latin America	y2035	8582.23	9069.54	9067.13	9069.1	9066.78		JAM	Latin America	y2035	487.313	484.905	486.867	484.548
CHL	Latin America	y2035	61077.6	60592.9	60576.8	60589.9	60574.4		CHL	Latin America	y2035	-484.757	-500.844	-487.736	-503.227
HTI	Latin America	y2035	31555.4	39673.1	39662.6	39671.1	39661		HTI	Latin America	y2035	8117.71	8107.18	8115.76	8105.62
BRA	Latin America	y2035	767908	693162	692978	693128	692951		BRA	Latin America	y2035	-74745.8	-74929.9	-74779.9	-74957.1
ARG	Latin America	y2035	167144	154909	154868	154901	154861		ARG	Latin America	y2035	-12235.6	-12276.7	-12243.2	-12282.8
VEN	Latin America	y2035	99560.6	105631	105603	105626	105599		VEN	Latin America	y2035	6070.81	6042.77	6065.62	6038.61
DOM	Latin America	y2035	34527.4	37363.8	37353.8	37361.9	37352.4		DOM	Latin America	y2035	2836.39	2826.47	2834.55	2825
BOL	Latin America	y2035	35207.7	42282.8	42271.6	42280.7	42269.9		BOL	Latin America	y2035	7075.12	7063.9	7073.05	7062.24
PRY	Latin America	y2035	23447.8	25265.4	25258.7	25264.2	25257.7		PRY	Latin America	y2035	1817.64	1810.93	1816.4	1809.94
TTO	Latin America	y2035	3850.05	4080.76	4079.67	4080.56	4079.51		TTO	Latin America	y2035	230.709	229.626	230.509	229.465
FLK	Latin America	y2035	12.2784	10.6688	10.666	10.6683	10.6656		FLK	Latin America	y2035	-1.60961	-1.61244	-1.61013	-1.61286
GUY	Latin America	y2035	2409.71	2300.49	2299.87	2300.37	2299.78		GUY	Latin America	y2035	-109.222	-109.833	-109.335	-109.924
URY	Latin America	y2035	11074.2	10691.1	10688.3	10690.6	10687.8		URY	Latin America	y2035	-383.102	-385.941	-383.628	-386.361
SUR	Latin America	y2035	1807.23	1885.55	1885.05	1885.46	1884.97		SUR	Latin America	y2035	78.32	77.8194	78.2273	77.7452
GUF	Latin America	y2035	1128.87	1072.49	1072.21	1072.44	1072.17		GUF	Latin America	y2035	-56.3733	-56.658	-56.426	-56.7002
SGS	Latin America	y2035	0.401989	0.356949	0.356854	0.356932	0.35684		SGS	Latin America	y2035	-0.0450403	-0.0451351	-0.0450578	-0.0451491
MAR	Africa	y2035	146916	127295	127098	127144	127540		MAR	Africa	y2035	-19621.6	-19817.8	-19771.8	-19376.1
TUN	Africa	y2035	45288.2	39562.2	39501.3	39515.5	39638.5		TUN	Africa	y2035	-5725.92	-5786.91	-5772.63	-5649.62
SAU	Africa	y2035	136231	129318	129119	129166	129568		SAU	Africa	y2035	-6912.83	-7112.19	-7065.5	-6663.43
ISR	Africa	y2035	42561.9	35620.8	35565.9	35578.8	35689.5		ISR	Africa	y2035	-6941.11	-6996.02	-6983.16	-6872.41
JOR	Africa	y2035	41217.8	37581	37523.1	37536.7	37653.5		JOR	Africa	y2035	-3636.73	-3694.67	-3681.1	-3564.25
LBN	Africa	y2035	22302.4	21302.4	21269.5	21277.2	21343.5		LBN	Africa	y2035	-999.972	-1032.81	-1025.12	-958.887
SYR	Africa	y2035	79028.1	80393.8	80269.8	80298.9	80548.8		SYR	Africa	y2035	1365.65	1241.72	1270.74	1520.7
IRQ	Africa	y2035	151213	168251	167992	168053	168576		IRQ	Africa	y2035	17038.5	16779.1	16839.8	17363
YEM	Africa	y2035	92334.1	124454	124262	124307	124694		YEM	Africa	y2035	32119.9	31928	31973	32359.9
KWT	Africa	y2035	17798.4	15451.6	15427.8	15433.4	15481.4		KWT	Africa	y2035	-2346.83	-2370.65	-2365.07	-2317.03
QAT	Africa	y2035	13659.6	11164.7	11147.5	11151.5	11186.2		QAT	Africa	y2035	-2494.9	-2512.11	-2508.08	-2473.36
OMN	Africa	y2035	20376.5	19214.2	19184.6	19191.5	19251.2		OMN	Africa	y2035	-1162.28	-1191.9	-1184.96	-1125.22
ARE	Africa	y2035	36815.7	36273.2	36217.3	36230.4	36343.1		ARE	Africa	y2035	-542.471	-598.39	-585.295	-472.514
PAK	Asia	y2035	762351	818773	818645	818782	818092		PAK	Asia	y2035	56422.6	56294.1	56431	55741
CAN	North America	y2035	145789	135752	135588	135880	135629		CAN	North America	y2035	-10037	-10201.3	-9909.35	-10160.5
PRI	Latin America	y2035	10810.8	9764.83	9762.24	9764.35	9761.85		PRI	Latin America	y2035	-1045.96	-1048.56	-1046.44	-1048.94
AUS	Oceania	y2035	97064	95404.3	95288.9	95494.1	95317.6		AUS	Oceania	y2035	-1659.67	-1775.15	-1569.95	-1746.43
JPN	Asia	y2035	321295	335920	334526	334859	336235		JPN	Asia	y2035	14625.1	13230.8	13564.2	14939.8
NZL	Oceania	y2035	18014.1	18091	18069.1	18108.1	18074.6		NZL	Oceania	y2035	76.9763	55.079	93.9888	60.5252
IDN	Asia	y2035	901478	892033	891893	892042	891291		IDN	Asia	y2035	-9444.45	-9584.44	-9435.32	-10187
MYS	Asia	y2035	118754	112139	112122	112140	112046		MYS	Asia	y2035	-6615.1	-6632.69	-6613.95	-6708.44
SGP	Asia	y2035	22511.2	18810.5	18807.5	18810.7	18794.8		SGP	Asia	y2035	-3700.73	-3703.68	-3700.54	-3716.39
BRN	Asia	y2035	1507.07	1462.27	1462.04	1462.29	1461.05		BRN	Asia	y2035	-44.8036	-45.0331	-44.7886	-46.0208
PHL	Asia	y2035	383319	380974	380914	380978	380657		PHL	Asia	y2035	-2344.74	-2404.53	-2340.84	-2661.87
TLS	Asia	y2035	4309.21	5207.14	5206.32	5207.19	5202.8		TLS	Asia	y2035	897.922	897.105	897.976	893.588
KOR	Asia	y2035	172907	151299	151276	151301	151173		KOR	Asia	y2035	-21607.6	-21631.3	-21606	-21733.5
PNG	Asia	y2035	31174.9	32925	32919.9	32925.4	32897.6		PNG	Asia	y2035	1750.2	1745.03	1750.53	1722.79
SLB	Asia	y2035	2572.12	2670.19	2669.77	2670.21	2667.96		SLB	Asia	y2035	98.0685	97.6495	98.0958	95.8457
NCL	Asia	y2035	897.647	901.365	901.223	901.374	900.614		NCL	Asia	y2035	3.71765	3.5762	3.72688	2.96732
VUT	Asia	y2035	1269.69	1166.39	1166.21	1166.4	1165.42		VUT	Asia	y2035	-103.298	-103.481	-103.286	-104.269
FJI	Asia	y2035	2930.03	2766.5	2766.07	2766.53	2764.2		FJI	Asia	y2035	-163.529	-163.963	-163.5	-165.832
REU	Africa	y2035	3103.59	2650.26	2650.7	2650.92	2645.79		REU	Africa	y2035	-453.324	-452.889	-452.662	-457.797
LKA	Asia	y2035	62445.7	66690.5	66680.1	66691.2	66635		LKA	Asia	y2035	4244.8	4234.33	4245.48	4189.28
BGD	Asia	y2035	536111	544330	544244	544335	543876		BGD	Asia	y2035	8219.02	8133.59	8224.59	7765.9
BTN	Asia	y2035	2886.93	2579.35	2578.95	2579.38	2577.21		BTN	Asia	y2035	-307.581	-307.986	-307.554	-309.728
SEN	Africa	y2040	72063.4	73076.7	73081.5	73084.5	72930.2		SEN	Africa	y2040	1013.3	1018.11	1021.15	866.795
GMB	Africa	y2040	11247.8	10493.3	10494	10494.4	10472.3		GMB	Africa	y2040	-754.532	-753.841	-753.404	-775.569
MRT	Africa	y2040	21220.1	19388.5	19389.8	19390.6	19349.6		MRT	Africa	y2040	-1831.59	-1830.32	-1829.51	-1870.46
ESH	Africa	y2040	2127.37	2325.39	2321.91	2322.72	2330.98		ESH	Africa	y2040	198.02	194.536	195.352	203.608
GNB	Africa	y2040	7578.75	7796.97	7797.48	7797.81	7781.34		GNB	Africa	y2040	218.219	218.733	219.057	202.588
GIN	Africa	y2040	63064.4	55714.3	55718	55720.3	55602.6		GIN	Africa	y2040	-7350.14	-7346.46	-7344.14	-7461.83
SLE	Africa	y2040	29901.6	31671.1	31673.2	31674.5	31607.6		SLE	Africa	y2040	1769.5	1771.59	1772.91	1706.01
MLI	Africa	y2040	102045	93036.7	93042.8	93046.7	92850.2		MLI	Africa	y2040	-9008.03	-9001.89	-8998.02	-9194.54
LBR	Africa	y2040	19382.7	21409	21410.4	21411.3	21366.1		LBR	Africa	y2040	2026.32	2027.74	2028.63	1983.4
CIV	Africa	y2040	125612	109090	109098	109102	108872		CIV	Africa	y2040	-16522.1	-16514.9	-16510.4	-16740.8
BFA	Africa	y2040	102608	95469.2	95475.5	95479.5	95277.8		BFA	Africa	y2040	-7138.35	-7132.06	-7128.09	-7329.75
GHA	Africa	y2040	156030	125984	125992	125997	125731		GHA	Africa	y2040	-30046.4	-30038.1	-30032.9	-30299
TGO	Africa	y2040	32529.9	33729.9	33732.2	33733.6	33662.3		TGO	Africa	y2040	1200.02	1202.25	1203.65	1132.4
NER	Africa	y2040	132737	134218	134227	134233	133949		NER	Africa	y2040	1481.31	1490.15	1495.74	1212.23
BEN	Africa	y2040	54312.6	52658	52661.5	52663.7	52552.4		BEN	Africa	y2040	-1654.61	-1651.14	-1648.95	-1760.18
DZA	Africa	y2040	172478	161962	161720	161777	162352		DZA	Africa	y2040	-10515.3	-10757.9	-10701.1	-10126
NGA	Africa	y2040	955635	930315	930376	930415	928450		NGA	Africa	y2040	-25320.5	-25259.2	-25220.5	-27185.6
CMR	Africa	y2040	111990	109203	109210	109215	108984		CMR	Africa	y2040	-2786.78	-2779.59	-2775.04	-3005.71
GAB	Africa	y2040	9107.49	8797.38	8797.96	8798.32	8779.74		GAB	Africa	y2040	-310.111	-309.531	-309.165	-327.747
GNQ	Africa	y2040	6872.57	6172.48	6172.88	6173.14	6160.1		GNQ	Africa	y2040	-700.09	-699.683	-699.426	-712.464
NAM	Africa	y2040	7686.61	9610.28	9610.92	9611.32	9591.02		NAM	Africa	y2040	1923.67	1924.31	1924.71	1904.41
AGO	Africa	y2040	130731	153343	153353	153360	153036		AGO	Africa	y2040	22612.3	22622.4	22628.8	22304.9
COG	Africa	y2040	19684.2	23396	23397.5	23398.5	23349.1		COG	Africa	y2040	3711.83	3713.37	3714.34	3664.92
COD	Africa	y2040	359359	415870	415897	415915	415036		COD	Africa	y2040	56511.2	56538.6	56555.9	55677.5
LBY	Africa	y2040	27791.3	24792.9	24755.8	24764.5	24852.5		LBY	Africa	y2040	-2998.42	-3035.56	-3026.86	-2938.84
TCD	Africa	y2040	61172.7	75460.6	75465.6	75468.7	75309.3		TCD	Africa	y2040	14287.9	14292.9	14296	14136.6
CAF	Africa	y2040	15979.6	18560.9	18562.2	18562.9	18523.7		CAF	Africa	y2040	2581.29	2582.51	2583.28	2544.08
ZAF	Africa	y2040	224635	201568	201581	201590	201164		ZAF	Africa	y2040	-23067.3	-23054.1	-23045.7	-23471.4
BWA	Africa	y2040	7432.54	8576.85	8577.42	8577.77	8559.66		BWA	Africa	y2040	1144.31	1144.87	1145.23	1127.11
ZMB	Africa	y2040	67226.3	87360.9	87366.6	87370.3	87185.7		ZMB	Africa	y2040	20134.6	20140.4	20144	19959.5
SDN	Africa	y2040	168453	191520	191233	191300	191980		SDN	Africa	y2040	23066.8	22779.8	22847	23527
ZWE	Africa	y2040	48064.4	56225.1	56228.8	56231.1	56112.3		ZWE	Africa	y2040	8160.68	8164.39	8166.73	8047.96
LSO	Africa	y2040	7121.84	6983.98	6984.44	6984.73	6969.98		LSO	Africa	y2040	-137.866	-137.406	-137.115	-151.867
BDI	Africa	y2040	42861.8	49346.6	49349.9	49351.9	49247.7		BDI	Africa	y2040	6484.84	6488.1	6490.15	6385.92
RWA	Africa	y2040	52324.2	55971.4	55975	55977.4	55859.2		RWA	Africa	y2040	3647.14	3650.83	3653.16	3534.93
TZA	Africa	y2040	248259	278960	278979	278990	278401		TZA	Africa	y2040	30701.7	30720.1	30731.7	30142.5
UGA	Africa	y2040	205900	223737	223751	223761	223288		UGA	Africa	y2040	17836.3	17851	17860.3	17387.7
MOZ	Africa	y2040	127805	134418	134426	134432	134148		MOZ	Africa	y2040	6612.92	6621.78	6627.37	6343.45
SWZ	Africa	y2040	3553.21	4049.56	4049.83	4049.99	4041.44		SWZ	Africa	y2040	496.35	496.617	496.785	488.232
MWI	Africa	y2040	85591.7	92124.3	92130.4	92134.2	91939.6		MWI	Africa	y2040	6532.62	6538.69	6542.53	6347.93
ETH	Africa	y2040	434903	486840	486872	486892	485864		ETH	Africa	y2040	51936.7	51968.8	51989	50960.7
EGY	Africa	y2040	504309	405799	405191	405333	406774		EGY	Africa	y2040	-98509.6	-99117.6	-98975.3	-97534.5
KEN	Africa	y2040	205114	228501	228516	228526	228043		KEN	Africa	y2040	23387.4	23402.4	23411.9	22929.3
ERI	Africa	y2040	10522.4	11452.3	11453	11453.5	11429.3		ERI	Africa	y2040	929.864	930.618	931.095	906.905
SOM	Africa	y2040	70159	73752.5	73757.4	73760.4	73604.7		SOM	Africa	y2040	3593.54	3598.4	3601.47	3445.69
DJI	Africa	y2040	3733.01	3705.93	3706.17	3706.33	3698.5		DJI	Africa	y2040	-27.0806	-26.8363	-26.6821	-34.51
MDG	Africa	y2040	99788.3	119677	119685	119690	119437		MDG	Africa	y2040	19889	19896.9	19901.9	19649.1
MUS	Africa	y2040	4062.55	3510.52	3510.75	3510.9	3503.48		MUS	Africa	y2040	-552.033	-551.801	-551.655	-559.07
ATF	Asia	y2040	0.764729	0.696319	0.696291	0.69634	0.695534		ATF	Asia	y2040	-0.0684102	-0.0684384	-0.0683891	-0.0691951
CHN	Asia	y2040	4.63667e+06	4.29019e+06	4.28107e+06	4.28316e+06	4.28027e+06		CHN	Asia	y2040	-346478	-355593	-353510	-356402
IND	Asia	y2040	4.62029e+06	4.73181e+06	4.73905e+06	4.7389e+06	4.72487e+06		IND	Asia	y2040	111516	118758	118615	104577
NPL	Asia	y2040	108290	107025	107021	107028	106904		NPL	Asia	y2040	-1265	-1269.34	-1261.75	-1385.64
MNG	Asia	y2040	10942.2	11493.4	11493	11493.8	11480.5		MNG	Asia	y2040	551.205	550.739	551.554	538.249
MMR	Asia	y2040	162632	173215	173208	173220	173020		MMR	Asia	y2040	10583.3	10576.3	10588.6	10388.1
LAO	Asia	y2040	25111.6	26136.5	26135.5	26137.3	26107.1		LAO	Asia	y2040	1024.95	1023.89	1025.74	995.488
THA	Asia	y2040	205667	204400	204392	204406	204170		THA	Asia	y2040	-1267.26	-1275.54	-1261.05	-1497.66
KHM	Asia	y2040	60369.5	60768.9	60766.5	60770.8	60700.4		KHM	Asia	y2040	399.455	396.994	401.301	330.956
VNM	Asia	y2040	327930	314419	314406	314429	314065		VNM	Asia	y2040	-13510.9	-13523.6	-13501.3	-13865.3
RUS	Europe	y2040	476012	425049	424724	424953	425409		RUS	Europe	y2040	-50963.7	-51288.7	-51059.7	-50603
PRK	Asia	y2040	55485.3	77278.1	77275	77280.4	77191		PRK	Asia	y2040	21792.7	21789.6	21795.1	21705.6
GRL	Europe	y2040	191.315	178.173	177.713	177.781	178.216		GRL	Europe	y2040	-13.142	-13.6023	-13.5342	-13.0991
ISL	Europe	y2040	1375.05	1317.59	1314.18	1314.68	1317.9		ISL	Europe	y2040	-57.4636	-60.8677	-60.364	-57.1468
ESP	Europe	y2040	154414	151231	151014	151112	151445		ESP	Europe	y2040	-3183.09	-3399.31	-3302.15	-2968.3
IRL	Europe	y2040	20417.9	17475.9	17450.9	17462.2	17500.7		IRL	Europe	y2040	-2942.01	-2967	-2955.77	-2917.19
PRT	Europe	y2040	34021.5	30099.6	30056.6	30075.9	30142.4		PRT	Europe	y2040	-3921.88	-3964.92	-3945.58	-3879.13
GBR	Europe	y2040	250030	229116	228789	228936	229442		GBR	Europe	y2040	-20913.3	-21240.9	-21093.7	-20587.9
FRA	Europe	y2040	262387	229917	229588	229736	230243		FRA	Europe	y2040	-32470.4	-32799.1	-32651.4	-32143.9
BEL	Europe	y2040	46287.2	38906	38850.4	38875.4	38961.3		BEL	Europe	y2040	-7381.23	-7436.86	-7411.86	-7325.97
NLD	Europe	y2040	58856	57728.6	57646.1	57683.1	57810.6		NLD	Europe	y2040	-1127.36	-1209.89	-1172.81	-1045.37
NOR	Europe	y2040	21595.1	19894.3	19842.9	19850.5	19899.1		NOR	Europe	y2040	-1700.78	-1752.18	-1744.58	-1696
LUX	Europe	y2040	2727.96	2444.2	2440.7	2442.27	2447.67		LUX	Europe	y2040	-283.764	-287.259	-285.689	-280.293
DEU	Europe	y2040	289485	260156	259785	259952	260526		DEU	Europe	y2040	-29328.5	-29700.5	-29533.3	-28959
CHE	Europe	y2040	33316.8	31132.6	31052.2	31064.1	31140.1		CHE	Europe	y2040	-2184.12	-2264.56	-2252.65	-2176.64
ITA	Europe	y2040	208012	181209	180950	181066	181466		ITA	Europe	y2040	-26803.3	-27062.4	-26945.9	-26545.9
DNK	Europe	y2040	21370.3	19711.4	19683.2	19695.9	19739.4		DNK	Europe	y2040	-1658.94	-1687.12	-1674.45	-1630.94
AUT	Europe	y2040	34688.9	29316	29274.1	29292.9	29357.6		AUT	Europe	y2040	-5372.91	-5414.83	-5395.99	-5331.28
SWE	Europe	y2040	36428.8	36295.9	36244	36267.3	36347.4		SWE	Europe	y2040	-132.891	-184.784	-161.466	-81.34
CZE	Europe	y2040	35069.7	32849.9	32803	32824.1	32896.6		CZE	Europe	y2040	-2219.75	-2266.72	-2245.62	-2173.1
HRV	Europe	y2040	11283.6	11587.9	11571.3	11578.7	11604.3		HRV	Europe	y2040	304.267	287.699	295.144	320.725
SVN	Europe	y2040	6779.38	6621.98	6612.51	6616.77	6631.38		SVN	Europe	y2040	-157.397	-166.864	-162.61	-147.992
SJM	Europe	y2040	9.1504	8.60522	8.58299	8.58628	8.60729		SJM	Europe	y2040	-0.545181	-0.567413	-0.564123	-0.543112
POL	Europe	y2040	125522	112538	112377	112449	112698		POL	Europe	y2040	-12984	-13144.9	-13072.6	-12824.1
BIH	Europe	y2040	8604.49	8441.76	8419.95	8423.18	8443.79		BIH	Europe	y2040	-162.735	-184.545	-181.318	-160.705
HUN	Europe	y2040	28782.4	28468.8	28428.1	28446.4	28509.2		HUN	Europe	y2040	-313.572	-354.275	-335.986	-273.138
SVK	Europe	y2040	15725.5	16496.4	16472.8	16483.4	16519.8		SVK	Europe	y2040	770.888	747.303	757.901	794.318
MNE	Europe	y2040	2203.31	1968.44	1963.35	1964.11	1968.91		MNE	Europe	y2040	-234.874	-239.959	-239.207	-234.4
SRB	Europe	y2040	22217.2	24984	24919.5	24929	24990		SRB	Europe	y2040	2766.82	2702.27	2711.82	2772.83
ALB	Europe	y2040	8219.01	8020.14	7999.41	8002.48	8022.06		ALB	Europe	y2040	-198.877	-219.597	-216.531	-196.948
GRC	Europe	y2040	36411.5	32826.1	32779.1	32800.2	32872.7		GRC	Europe	y2040	-3585.39	-3632.33	-3611.24	-3538.77
MKD	Europe	y2040	6050.14	6218.47	6202.4	6204.78	6219.96		MKD	Europe	y2040	168.324	152.258	154.636	169.819
ROU	Europe	y2040	58101.1	52548	52472.8	52506.6	52622.6		ROU	Europe	y2040	-5553.17	-5628.3	-5594.55	-5478.54
LTU	Europe	y2040	8322.1	7575.55	7564.72	7569.59	7586.31		LTU	Europe	y2040	-746.549	-757.38	-752.513	-735.789
LVA	Europe	y2040	5519.5	5268.31	5260.77	5264.16	5275.79		LVA	Europe	y2040	-251.194	-258.726	-255.342	-243.711
FIN	Europe	y2040	18636.3	17778.5	17753.1	17764.5	17803.7		FIN	Europe	y2040	-857.787	-883.206	-871.784	-832.537
EST	Europe	y2040	4390.29	3994.73	3989.02	3991.59	4000.41		EST	Europe	y2040	-395.554	-401.265	-398.699	-389.88
BGR	Europe	y2040	16781.7	18042.5	18016.8	18028.3	18068.2		BGR	Europe	y2040	1260.87	1235.08	1246.67	1286.5
BLR	Europe	y2040	29584.1	27415.5	27394.5	27409.3	27438.7		BLR	Europe	y2040	-2168.62	-2189.58	-2174.81	-2145.36
TUR	Europe	y2040	368776	305559	304770	304887	305633		TUR	Europe	y2040	-63217.1	-64006.6	-63889.8	-63143.7
MDA	Europe	y2040	7184.93	7425.78	7420.11	7424.11	7432.08		MDA	Europe	y2040	240.853	235.174	239.176	247.154
CYP	Europe	y2040	3675.79	4249.39	4243.32	4246.05	4255.43		CYP	Europe	y2040	573.6	567.524	570.254	579.635
IRN	Africa	y2040	307204	294062	293622	293725	294769		IRN	Africa	y2040	-13141.4	-13581.9	-13478.8	-12434.7
UKR	Europe	y2040	131739	122127	122034	122099	122231		UKR	Europe	y2040	-9611.93	-9705.32	-9639.51	-9508.3
GEO	Europe	y2040	9608.7	9592.68	9585.34	9590.51	9600.82		GEO	Europe	y2040	-16.0258	-23.361	-18.1923	-7.88584
ARM	Europe	y2040	8281.92	8499.82	8493.32	8497.9	8507.03		ARM	Europe	y2040	217.9	211.4	215.98	225.112
AZE	Europe	y2040	32715.8	33495.3	33469.7	33487.7	33523.7		AZE	Europe	y2040	779.461	753.848	771.896	807.884
KAZ	Europe	y2040	68737.4	62977.4	62929.3	62963.2	63030.9		KAZ	Europe	y2040	-5759.99	-5808.15	-5774.21	-5706.55
TKM	Europe	y2040	23542.7	22449.8	22432.6	22444.7	22468.8		TKM	Europe	y2040	-1092.96	-1110.12	-1098.03	-1073.91
UZB	Europe	y2040	123898	126447	126350	126418	126554		UZB	Europe	y2040	2548.58	2451.89	2520.02	2655.88
AFG	Asia	y2040	147720	184372	184364	184377	184164		AFG	Asia	y2040	36652.2	36644.8	36657.8	36444.4
TJK	Europe	y2040	32903.4	38802.9	38773.2	38794.1	38835.8		TJK	Europe	y2040	5899.5	5869.83	5890.74	5932.43
KGZ	Europe	y2040	25182.3	24555.8	24537	24550.2	24576.6		KGZ	Europe	y2040	-626.51	-645.287	-632.056	-605.673
MEX	Latin America	y2040	489312	454799	454723	454793	454531		MEX	Latin America	y2040	-34512.8	-34589.2	-34518.8	-34780.8
USA	North America	y2040	1.37035e+06	1.21144e+06	1.21093e+06	1.21342e+06	1.20659e+06		USA	North America	y2040	-158912	-159426	-156930	-163760
GTM	Latin America	y2040	63180.6	67527.5	67516.2	67526.6	67487.7		GTM	Latin America	y2040	4346.92	4335.58	4346.03	4307.13
ECU	Latin America	y2040	56225.9	65237.3	65226.3	65236.4	65198.8		ECU	Latin America	y2040	9011.33	9000.38	9010.47	8972.9
SLV	Latin America	y2040	18982.3	20516.5	20513	20516.2	20504.4		SLV	Latin America	y2040	1534.2	1530.75	1533.93	1522.11
HND	Latin America	y2040	37997.7	38403.6	38397.2	38403.1	38381		HND	Latin America	y2040	405.98	399.534	405.474	383.355
BLZ	Latin America	y2040	1578.45	1554.41	1554.15	1554.39	1553.49		BLZ	Latin America	y2040	-24.0444	-24.3053	-24.0648	-24.9601
NIC	Latin America	y2040	22398.4	23425.4	23421.4	23425	23411.6		NIC	Latin America	y2040	1026.94	1023.01	1026.63	1013.14
CRI	Latin America	y2040	17660.5	17525.4	17522.5	17525.2	17515.1		CRI	Latin America	y2040	-135.108	-138.05	-135.339	-145.433
CUB	Latin America	y2040	34071.5	31472.2	31466.9	31471.7	31453.6		CUB	Latin America	y2040	-2599.35	-2604.63	-2599.77	-2617.89
PAN	Latin America	y2040	15215.7	16094.1	16091.4	16093.9	16084.6		PAN	Latin America	y2040	878.409	875.708	878.198	868.928
PER	Latin America	y2040	112182	115651	115632	115650	115583		PER	Latin America	y2040	3468.97	3449.56	3467.45	3400.84
COL	Latin America	y2040	160007	167866	167838	167864	167767		COL	Latin America	y2040	7859.02	7830.84	7856.81	7760.13
BHS	Latin America	y2040	1207.2	1383.31	1383.08	1383.29	1382.5		BHS	Latin America	y2040	176.11	175.878	176.092	175.295
JAM	Latin America	y2040	8511.15	8838.89	8837.41	8838.77	8833.68		JAM	Latin America	y2040	327.737	326.253	327.62	322.53
CHL	Latin America	y2040	62217.9	60859.2	60848.9	60858.4	60823.3		CHL	Latin America	y2040	-1358.77	-1368.98	-1359.57	-1394.62
HTI	Latin America	y2040	33469.2	40390.8	40384	40390.3	40367		HTI	Latin America	y2040	6921.6	6914.82	6921.07	6897.8
BRA	Latin America	y2040	779927	695806	695690	695797	695396		BRA	Latin America	y2040	-84120.3	-84237.1	-84129.5	-84530.3
ARG	Latin America	y2040	173565	158820	158793	158818	158726		ARG	Latin America	y2040	-14745.2	-14771.8	-14747.3	-14838.7
VEN	Latin America	y2040	104385	108726	108708	108724	108662		VEN	Latin America	y2040	4340.43	4322.18	4339	4276.38
DOM	Latin America	y2040	35843.7	38284.5	38278	38284	38261.9		DOM	Latin America	y2040	2440.78	2434.35	2440.27	2418.22
BOL	Latin America	y2040	37635.9	43906.5	43899.1	43905.9	43880.6		BOL	Latin America	y2040	6270.55	6263.18	6269.97	6244.68
PRY	Latin America	y2040	24584.4	26034.4	26030	26034.1	26019.1		PRY	Latin America	y2040	1450	1445.63	1449.65	1434.66
TTO	Latin America	y2040	3717.99	3914.68	3914.03	3914.63	3912.38		TTO	Latin America	y2040	196.697	196.04	196.645	194.39
FLK	Latin America	y2040	12.0961	10.4886	10.4868	10.4884	10.4824		FLK	Latin America	y2040	-1.60747	-1.60923	-1.6076	-1.61365
GUY	Latin America	y2040	2301.7	2173.84	2173.48	2173.81	2172.56		GUY	Latin America	y2040	-127.854	-128.219	-127.882	-129.135
URY	Latin America	y2040	11045.2	10538.5	10536.7	10538.4	10532.3		URY	Latin America	y2040	-506.747	-508.516	-506.886	-512.956
SUR	Latin America	y2040	1831.5	1865.79	1865.48	1865.76	1864.69		SUR	Latin America	y2040	34.2879	33.9747	34.2633	33.1887
GUF	Latin America	y2040	1220.54	1155.95	1155.75	1155.93	1155.27		GUF	Latin America	y2040	-64.5935	-64.7875	-64.6087	-65.2745
SGS	Latin America	y2040	0.404899	0.358532	0.358472	0.358527	0.358321		SGS	Latin America	y2040	-0.0463666	-0.0464267	-0.0463713	-0.0465778
MAR	Africa	y2040	151973	128493	128301	128346	128802		MAR	Africa	y2040	-23479.5	-23672	-23626.9	-23170.7
TUN	Africa	y2040	46409.6	39634.7	39575.3	39589.2	39730		TUN	Africa	y2040	-6774.88	-6834.26	-6820.36	-6679.64
SAU	Africa	y2040	142733	134896	134694	134741	135220		SAU	Africa	y2040	-7836.76	-8038.86	-7991.54	-7512.59
ISR	Africa	y2040	46079.9	38088	38030.9	38044.3	38179.5		ISR	Africa	y2040	-7991.9	-8048.97	-8035.61	-7900.37
JOR	Africa	y2040	45296	40271.9	40211.6	40225.7	40368.7		JOR	Africa	y2040	-5024.06	-5084.4	-5070.27	-4927.28
LBN	Africa	y2040	23610.2	21939.9	21907	21914.7	21992.6		LBN	Africa	y2040	-1670.36	-1703.23	-1695.53	-1617.64
SYR	Africa	y2040	84232.3	82629.3	82505.5	82534.5	82827.9		SYR	Africa	y2040	-1602.96	-1726.76	-1697.77	-1404.4
IRQ	Africa	y2040	165181	181022	180750	180814	181457		IRQ	Africa	y2040	15840.1	15568.8	15632.4	16275.1
YEM	Africa	y2040	104475	134590	134389	134436	134914		YEM	Africa	y2040	30115.2	29913.5	29960.7	30438.6
KWT	Africa	y2040	18536.3	16025.7	16001.6	16007.3	16064.2		KWT	Africa	y2040	-2510.65	-2534.66	-2529.04	-2472.14
QAT	Africa	y2040	14421.1	11835	11817.2	11821.4	11863.4		QAT	Africa	y2040	-2586.13	-2603.86	-2599.71	-2557.69
OMN	Africa	y2040	21416.9	19967.7	19937.8	19944.8	20015.7		OMN	Africa	y2040	-1449.22	-1479.14	-1472.13	-1401.24
ARE	Africa	y2040	38635.3	38203.1	38145.9	38159.3	38294.9		ARE	Africa	y2040	-432.233	-489.471	-476.069	-340.428
PAK	Asia	y2040	823862	878484	878448	878510	877493		PAK	Asia	y2040	54622.1	54586.5	54648.7	53631.8
CAN	North America	y2040	150059	136636	136505	136763	136485		CAN	North America	y2040	-13423.2	-13553.7	-13296.1	-13574.1
PRI	Latin America	y2040	10568.7	9490.39	9488.79	9490.26	9484.8		PRI	Latin America	y2040	-1078.32	-1079.92	-1078.45	-1083.92
AUS	Oceania	y2040	101505	97418.5	97325.4	97509.2	97311		AUS	Oceania	y2040	-4086.32	-4179.41	-3995.7	-4193.9
JPN	Asia	y2040	311516	330536	329163	329587	330716		JPN	Asia	y2040	19019.7	17646.6	18070.8	19199.6
NZL	Oceania	y2040	18578	18210.2	18192.8	18227.1	18190.1		NZL	Oceania	y2040	-367.839	-385.239	-350.899	-387.947
IDN	Asia	y2040	926111	917017	916980	917045	915983		IDN	Asia	y2040	-9094.01	-9131.15	-9066.16	-10127.7
MYS	Asia	y2040	124513	118136	118131	118140	118003		MYS	Asia	y2040	-6376.65	-6381.43	-6373.06	-6509.81
SGP	Asia	y2040	23339	19665.2	19664.4	19665.8	19643		SGP	Asia	y2040	-3673.83	-3674.63	-3673.24	-3696
BRN	Asia	y2040	1557.43	1529.9	1529.84	1529.95	1528.18		BRN	Asia	y2040	-27.5273	-27.5893	-27.4808	-29.2518
PHL	Asia	y2040	404697	401890	401873	401902	401437		PHL	Asia	y2040	-2807.6	-2823.88	-2795.4	-3260.62
TLS	Asia	y2040	4956.58	5737.89	5737.65	5738.06	5731.42		TLS	Asia	y2040	781.308	781.076	781.483	774.84
KOR	Asia	y2040	171010	150824	150818	150828	150654		KOR	Asia	y2040	-20185.8	-20191.9	-20181.2	-20355.8
PNG	Asia	y2040	34191.2	35070.3	35068.9	35071.4	35030.8		PNG	Asia	y2040	879.114	877.694	880.179	839.582
SLB	Asia	y2040	2842.28	2881.88	2881.76	2881.96	2878.63		SLB	Asia	y2040	39.5996	39.4829	39.6871	36.3511
NCL	Asia	y2040	928.63	941.646	941.608	941.674	940.584		NCL	Asia	y2040	13.0161	12.978	13.0447	11.9547
VUT	Asia	y2040	1395.01	1249.34	1249.29	1249.38	1247.93		VUT	Asia	y2040	-145.666	-145.716	-145.628	-147.074
FJI	Asia	y2040	2939.33	2784.65	2784.54	2784.74	2781.52		FJI	Asia	y2040	-154.678	-154.791	-154.594	-157.817
REU	Africa	y2040	3168.42	2787.25	2787.43	2787.55	2781.66		REU	Africa	y2040	-381.172	-380.989	-380.873	-386.76
LKA	Asia	y2040	63460	67631.5	67628.8	67633.6	67555.3		LKA	Asia	y2040	4171.57	4168.83	4173.62	4095.33
BGD	Asia	y2040	557899	563612	563589	563629	562976		BGD	Asia	y2040	5712.88	5690.05	5730	5077.57
BTN	Asia	y2040	3031.54	2687.33	2687.22	2687.41	2684.3		BTN	Asia	y2040	-344.207	-344.316	-344.125	-347.236
SEN	Africa	y2045	79708.5	80328.7	80312.3	80309.3	80176		SEN	Africa	y2045	620.179	603.784	600.779	467.437
GMB	Africa	y2045	12358.9	11432.7	11430.4	11430	11411		GMB	Africa	y2045	-926.194	-928.528	-928.956	-947.933
MRT	Africa	y2045	22898.6	20977	20972.7	20971.9	20937.1		MRT	Africa	y2045	-1921.58	-1925.86	-1926.65	-1961.47
ESH	Africa	y2045	2300.98	2467.27	2464.11	2464.73	2474.37		ESH	Africa	y2045	166.286	163.131	163.744	173.391
GNB	Africa	y2045	8272.53	8341.39	8339.69	8339.38	8325.53		GNB	Africa	y2045	68.8653	67.1629	66.8508	53.0045
GIN	Africa	y2045	69488.3	60413.5	60401.2	60398.9	60298.7		GIN	Africa	y2045	-9074.8	-9087.13	-9089.39	-9189.67
SLE	Africa	y2045	32634.5	34012.4	34005.5	34004.2	33947.8		SLE	Africa	y2045	1377.91	1370.97	1369.7	1313.24
MLI	Africa	y2045	113627	102810	102789	102785	102614		MLI	Africa	y2045	-10817.1	-10838.1	-10841.9	-11012.6
LBR	Africa	y2045	21521	23315.2	23310.5	23309.6	23270.9		LBR	Africa	y2045	1794.26	1789.5	1788.63	1749.92
CIV	Africa	y2045	136361	117836	117812	117808	117612		CIV	Africa	y2045	-18524.8	-18548.9	-18553.3	-18748.9
BFA	Africa	y2045	115187	106042	106021	106017	105841		BFA	Africa	y2045	-9145.27	-9166.91	-9170.88	-9346.91
GHA	Africa	y2045	170344	136993	136965	136960	136733		GHA	Africa	y2045	-33350.8	-33378.7	-33383.8	-33611.2
TGO	Africa	y2045	35407	36319.7	36312.3	36311	36250.7		TGO	Africa	y2045	912.732	905.319	903.96	843.671
NER	Africa	y2045	155850	156816	156784	156778	156518		NER	Africa	y2045	965.732	933.727	927.859	667.552
BEN	Africa	y2045	59557.1	57584	57572.2	57570.1	57474.5		BEN	Africa	y2045	-1973.13	-1984.88	-1987.03	-2082.62
DZA	Africa	y2045	177600	164779	164568	164609	165254		DZA	Africa	y2045	-12821.1	-13031.9	-12991	-12346.7
NGA	Africa	y2045	1.07347e+06	1.04334e+06	1.04313e+06	1.04309e+06	1.04136e+06		NGA	Africa	y2045	-30125.7	-30338.6	-30377.7	-32109.6
CMR	Africa	y2045	121618	117762	117738	117734	117539		CMR	Africa	y2045	-3855.82	-3879.86	-3884.26	-4079.74
GAB	Africa	y2045	9691.74	9441.02	9439.09	9438.74	9423.07		GAB	Africa	y2045	-250.725	-252.652	-253.005	-268.677
GNQ	Africa	y2045	7474.48	6735.98	6734.6	6734.35	6723.17		GNQ	Africa	y2045	-738.499	-739.874	-740.126	-751.307
NAM	Africa	y2045	8208.88	10233.2	10231.1	10230.7	10213.7		NAM	Africa	y2045	2024.28	2022.19	2021.81	2004.82
AGO	Africa	y2045	144610	169650	169615	169609	169327		AGO	Africa	y2045	25040.2	25005.6	24999.3	24717.7
COG	Africa	y2045	21775.7	25466.9	25461.7	25460.7	25418.4		COG	Africa	y2045	3691.14	3685.94	3684.98	3642.71
COD	Africa	y2045	409269	460927	460832	460815	460050		COD	Africa	y2045	51657.2	51563.1	51545.9	50780.8
LBY	Africa	y2045	28449.1	25195.7	25163.5	25169.8	25268.3		LBY	Africa	y2045	-3253.36	-3285.58	-3279.32	-3180.81
TCD	Africa	y2045	69493.5	83523.6	83506.5	83503.4	83364.7		TCD	Africa	y2045	14030	14013	14009.9	13871.2
CAF	Africa	y2045	17308.5	19694.8	19690.8	19690	19657.3		CAF	Africa	y2045	2386.26	2382.24	2381.5	2348.81
ZAF	Africa	y2045	232586	210389	210346	210338	209989		ZAF	Africa	y2045	-22197.4	-22240.3	-22248.2	-22597.4
BWA	Africa	y2045	7757.2	9018.77	9016.93	9016.59	9001.62		BWA	Africa	y2045	1261.57	1259.73	1259.4	1244.42
ZMB	Africa	y2045	77386.2	98169.1	98149	98145.4	97982.4		ZMB	Africa	y2045	20782.8	20762.8	20759.1	20596.2
SDN	Africa	y2045	183160	201238	200980	201030	201817		SDN	Africa	y2045	18077.4	17820	17870	18656.8
ZWE	Africa	y2045	51848.1	59925.9	59913.7	59911.5	59812		ZWE	Africa	y2045	8077.83	8065.6	8063.36	7963.89
LSO	Africa	y2045	7477.65	7234.28	7232.81	7232.54	7220.53		LSO	Africa	y2045	-243.362	-244.838	-245.109	-257.118
BDI	Africa	y2045	47083.2	52961.4	52950.6	52948.6	52860.7		BDI	Africa	y2045	5878.2	5867.39	5865.41	5777.5
RWA	Africa	y2045	58045.8	61611.3	61598.7	61596.4	61494.2		RWA	Africa	y2045	3565.57	3553	3550.69	3448.42
TZA	Africa	y2045	280400	311222	311159	311147	310631		TZA	Africa	y2045	30822.4	30758.8	30747.2	30230.6
UGA	Africa	y2045	238880	254847	254795	254785	254362		UGA	Africa	y2045	15966.8	15914.8	15905.3	15482.2
MOZ	Africa	y2045	141538	145829	145799	145794	145552		MOZ	Africa	y2045	4291.29	4261.53	4256.08	4014.01
SWZ	Africa	y2045	3717.21	4259.86	4258.99	4258.83	4251.76		SWZ	Africa	y2045	542.645	541.776	541.616	534.545
MWI	Africa	y2045	98795.6	104579	104558	104554	104381		MWI	Africa	y2045	5783.89	5762.54	5758.63	5585.03
ETH	Africa	y2045	481303	528561	528453	528433	527556		ETH	Africa	y2045	47257.9	47150	47130.2	46252.8
EGY	Africa	y2045	531933	419982	419445	419549	421191		EGY	Africa	y2045	-111951	-112489	-112384	-110742
KEN	Africa	y2045	226911	250590	250539	250529	250113		KEN	Africa	y2045	23679	23627.9	23618.5	23202.5
ERI	Africa	y2045	11236	12383.4	12380.9	12380.4	12359.9		ERI	Africa	y2045	1147.47	1144.94	1144.48	1123.92
SOM	Africa	y2045	76477.2	81863.8	81847.1	81844.1	81708.2		SOM	Africa	y2045	5386.59	5369.88	5366.82	5230.93
DJI	Africa	y2045	3969.43	3967.16	3966.35	3966.2	3959.61		DJI	Africa	y2045	-2.27671	-3.08638	-3.23482	-9.82009
MDG	Africa	y2045	110936	130938	130911	130906	130689		MDG	Africa	y2045	20001.9	19975.2	19970.3	19752.9
MUS	Africa	y2045	3969.74	3476.8	3476.09	3475.96	3470.19		MUS	Africa	y2045	-492.946	-493.655	-493.785	-499.557
ATF	Asia	y2045	0.776716	0.712215	0.712294	0.712198	0.711326		ATF	Asia	y2045	-0.0645017	-0.0644228	-0.0645184	-0.0653908
CHN	Asia	y2045	4.54834e+06	4.10761e+06	4.10263e+06	4.10334e+06	4.09945e+06		CHN	Asia	y2045	-440729	-445706	-444997	-448890
IND	Asia	y2045	4.76895e+06	4.85269e+06	4.85823e+06	4.85742e+06	4.84559e+06		IND	Asia	y2045	83737.7	89277.9	88467.9	76642.5
NPL	Asia	y2045	113261	110761	110774	110759	110623		NPL	Asia	y2045	-2499.88	-2487.61	-2502.48	-2638.15
MNG	Asia	y2045	11273	11831.6	11832.9	11831.3	11816.8		MNG	Asia	y2045	558.585	559.895	558.307	543.815
MMR	Asia	y2045	163688	173050	173069	173046	172834		MMR	Asia	y2045	9361.62	9380.79	9357.56	9145.6
LAO	Asia	y2045	26168.2	26966.3	26969.3	26965.7	26932.7		LAO	Asia	y2045	798.124	801.11	797.49	764.461
THA	Asia	y2045	203268	201249	201271	201244	200997		THA	Asia	y2045	-2019.14	-1996.85	-2023.86	-2270.36
KHM	Asia	y2045	63515.9	63194.1	63201.1	63192.6	63115.2		KHM	Asia	y2045	-321.865	-314.867	-323.35	-400.752
VNM	Asia	y2045	331727	317232	317267	317225	316836		VNM	Asia	y2045	-14494.8	-14459.7	-14502.3	-14890.8
RUS	Europe	y2045	471224	414123	413879	414028	414164		RUS	Europe	y2045	-57100.5	-57345	-57195.6	-57059.7
PRK	Asia	y2045	54284	76534.2	76542.7	76532.4	76438.7		PRK	Asia	y2045	22250.2	22258.7	22248.4	22154.7
GRL	Europe	y2045	186.938	168.029	167.74	167.77	167.927		GRL	Europe	y2045	-18.9088	-19.1979	-19.1677	-19.0105
ISL	Europe	y2045	1403.74	1292.74	1290.52	1290.75	1291.96		ISL	Europe	y2045	-110.996	-113.22	-112.988	-111.779
ESP	Europe	y2045	154936	147943	147818	147864	148037		ESP	Europe	y2045	-6993.28	-7118.68	-7071.77	-6899.47
IRL	Europe	y2045	20828	17380.7	17366	17371.5	17391.7		IRL	Europe	y2045	-3447.34	-3462.07	-3456.56	-3436.32
PRT	Europe	y2045	33220.8	28552.6	28528.3	28537.4	28570.7		PRT	Europe	y2045	-4668.27	-4692.47	-4683.42	-4650.16
GBR	Europe	y2045	254903	226846	226654	226726	226990		GBR	Europe	y2045	-28057.5	-28249.8	-28177.8	-27913.6
FRA	Europe	y2045	267869	227740	227547	227619	227885		FRA	Europe	y2045	-40128.9	-40321.9	-40249.7	-39984.4
BEL	Europe	y2045	47062.3	38389.6	38357.1	38369.3	38414		BEL	Europe	y2045	-8672.71	-8705.25	-8693.08	-8648.37
NLD	Europe	y2045	59408.5	56477.4	56429.5	56447.4	56513.2		NLD	Europe	y2045	-2931.17	-2979.04	-2961.13	-2895.35
NOR	Europe	y2045	22207.8	19633.4	19599.6	19603.1	19621.5		NOR	Europe	y2045	-2574.4	-2608.18	-2604.66	-2586.29
LUX	Europe	y2045	2858.55	2488.93	2486.82	2487.61	2490.51		LUX	Europe	y2045	-369.619	-371.729	-370.94	-368.041
DEU	Europe	y2045	289374	252514	252300	252380	252674		DEU	Europe	y2045	-36860	-37074	-36994	-36699.9
CHE	Europe	y2045	34150.4	30637.4	30584.7	30590.2	30618.9		CHE	Europe	y2045	-3512.93	-3565.65	-3560.15	-3531.49
ITA	Europe	y2045	206226	174300	174152	174208	174411		ITA	Europe	y2045	-31925.9	-32073.6	-32018.3	-31815.3
DNK	Europe	y2045	21742.2	19408.4	19392	19398.1	19420.7		DNK	Europe	y2045	-2333.8	-2350.25	-2344.1	-2321.49
AUT	Europe	y2045	35007.6	28760.8	28736.4	28745.5	28779		AUT	Europe	y2045	-6246.79	-6271.17	-6262.05	-6228.56
SWE	Europe	y2045	37474.4	36249.6	36218.8	36230.3	36272.6		SWE	Europe	y2045	-1224.85	-1255.57	-1244.08	-1201.86
CZE	Europe	y2045	34720.3	31614.7	31587.9	31597.9	31634.7		CZE	Europe	y2045	-3105.63	-3132.43	-3122.41	-3085.59
HRV	Europe	y2045	11033.4	11001	10991.7	10995.2	11008		HRV	Europe	y2045	-32.3283	-41.6531	-38.1652	-25.3526
SVN	Europe	y2045	6774.52	6444.38	6438.92	6440.96	6448.47		SVN	Europe	y2045	-330.137	-335.6	-333.556	-326.051
SJM	Europe	y2045	9.12752	8.28972	8.27546	8.27695	8.2847		SJM	Europe	y2045	-0.837797	-0.85206	-0.850573	-0.842817
POL	Europe	y2045	122417	106795	106705	106739	106863		POL	Europe	y2045	-15621.2	-15711.8	-15677.9	-15553.5
BIH	Europe	y2045	7911.71	7418.8	7406.03	7407.37	7414.31		BIH	Europe	y2045	-492.909	-505.673	-504.342	-497.402
HUN	Europe	y2045	28179.2	27054.8	27031.8	27040.4	27071.9		HUN	Europe	y2045	-1124.38	-1147.32	-1138.74	-1107.23
SVK	Europe	y2045	15416.9	15720.5	15707.2	15712.1	15730.5		SVK	Europe	y2045	303.586	290.261	295.245	313.554
MNE	Europe	y2045	2182.91	1869.08	1865.86	1866.2	1867.95		MNE	Europe	y2045	-313.829	-317.045	-316.709	-314.961
SRB	Europe	y2045	21519	23225.1	23185.2	23189.3	23211.1		SRB	Europe	y2045	1706.13	1666.17	1670.34	1692.07
ALB	Europe	y2045	7790.62	7273.56	7261.05	7262.35	7269.16		ALB	Europe	y2045	-517.059	-529.573	-528.268	-521.463
GRC	Europe	y2045	36441.7	31889.2	31862.2	31872.3	31909.5		GRC	Europe	y2045	-4552.44	-4579.47	-4569.36	-4532.22
MKD	Europe	y2045	5874.35	5773.29	5763.35	5764.39	5769.79		MKD	Europe	y2045	-101.061	-110.994	-109.958	-104.557
ROU	Europe	y2045	55267.5	48575.2	48534	48549.4	48606		ROU	Europe	y2045	-6692.31	-6733.48	-6718.08	-6661.51
LTU	Europe	y2045	8008.21	7094.71	7088.7	7090.95	7099.21		LTU	Europe	y2045	-913.499	-919.512	-917.263	-909
LVA	Europe	y2045	5406.92	5022.89	5018.63	5020.23	5026.08		LVA	Europe	y2045	-384.026	-388.283	-386.691	-380.841
FIN	Europe	y2045	18714.2	17317.5	17302.8	17308.3	17328.5		FIN	Europe	y2045	-1396.63	-1411.31	-1405.82	-1385.65
EST	Europe	y2045	4365.7	3862.98	3859.7	3860.93	3865.43		EST	Europe	y2045	-502.724	-505.999	-504.774	-500.275
BGR	Europe	y2045	15944.6	16635.5	16621.4	16626.7	16646.1		BGR	Europe	y2045	690.904	676.804	682.078	701.453
BLR	Europe	y2045	29204	26580.9	26565.2	26574.8	26583.5		BLR	Europe	y2045	-2623.07	-2638.76	-2629.17	-2620.45
TUR	Europe	y2045	375798	298451	297938	297991	298271		TUR	Europe	y2045	-77346.3	-77859.8	-77806.3	-77527.1
MDA	Europe	y2045	7023.96	7093.62	7089.44	7092	7094.32		MDA	Europe	y2045	69.6614	65.4731	68.0326	70.3595
CYP	Europe	y2045	3751.67	4217.09	4213.51	4214.85	4219.76		CYP	Europe	y2045	465.42	461.846	463.183	468.094
IRN	Africa	y2045	312445	296025	295646	295720	296877		IRN	Africa	y2045	-16420.9	-16799.5	-16725.9	-15568.5
UKR	Europe	y2045	129735	117489	117420	117462	117501		UKR	Europe	y2045	-12245.6	-12315	-12272.6	-12234
GEO	Europe	y2045	9101.46	8891.82	8886.57	8889.78	8892.7		GEO	Europe	y2045	-209.638	-214.888	-211.68	-208.763
ARM	Europe	y2045	8056.43	8098.37	8093.59	8096.51	8099.17		ARM	Europe	y2045	41.9412	37.1596	40.0817	42.7382
AZE	Europe	y2045	32567.1	32912.4	32893	32904.9	32915.7		AZE	Europe	y2045	345.299	325.866	337.742	348.538
KAZ	Europe	y2045	69128.1	62228.6	62191.9	62214.3	62234.8		KAZ	Europe	y2045	-6899.42	-6936.17	-6913.71	-6893.3
TKM	Europe	y2045	24381.7	22708.1	22694.7	22702.9	22710.3		TKM	Europe	y2045	-1673.6	-1687.01	-1678.82	-1671.37
UZB	Europe	y2045	128391	127653	127578	127624	127665		UZB	Europe	y2045	-738.142	-813.513	-767.453	-725.58
AFG	Asia	y2045	169033	204078	204101	204073	203823		AFG	Asia	y2045	35044.9	35067.5	35040.1	34790.2
TJK	Europe	y2045	35224	39759.4	39735.9	39750.3	39763.3		TJK	Europe	y2045	4535.38	4511.9	4526.25	4539.29
KGZ	Europe	y2045	26321.5	24749.3	24734.7	24743.6	24751.7		KGZ	Europe	y2045	-1572.17	-1586.78	-1577.85	-1569.73
MEX	Latin America	y2045	503782	460482	460457	460482	460114		MEX	Latin America	y2045	-43300.6	-43325	-43300.6	-43668.7
USA	North America	y2045	1.40545e+06	1.19127e+06	1.19114e+06	1.19258e+06	1.18762e+06		USA	North America	y2045	-214178	-214307	-212871	-217829
GTM	Latin America	y2045	67126	70086.4	70082.7	70086.4	70030.4		GTM	Latin America	y2045	2960.37	2956.65	2960.37	2904.35
ECU	Latin America	y2045	58925.8	66827.4	66823.8	66827.4	66773.9		ECU	Latin America	y2045	7901.61	7898.06	7901.61	7848.19
SLV	Latin America	y2045	19079.4	20200.8	20199.7	20200.8	20184.6		SLV	Latin America	y2045	1121.35	1120.28	1121.35	1105.2
HND	Latin America	y2045	40339.4	39628	39625.9	39628	39596.3		HND	Latin America	y2045	-711.379	-713.482	-711.379	-743.055
BLZ	Latin America	y2045	1664.36	1604.47	1604.39	1604.47	1603.19		BLZ	Latin America	y2045	-59.884	-59.9691	-59.884	-61.1665
NIC	Latin America	y2045	23178.2	23603.5	23602.3	23603.5	23584.6		NIC	Latin America	y2045	425.338	424.086	425.338	406.471
CRI	Latin America	y2045	18031.7	17664.7	17663.8	17664.7	17650.6		CRI	Latin America	y2045	-366.949	-367.886	-366.949	-381.069
CUB	Latin America	y2045	32937.4	29939.8	29938.2	29939.8	29915.9		CUB	Latin America	y2045	-2997.6	-2999.19	-2997.6	-3021.53
PAN	Latin America	y2045	15829.5	16475.1	16474.2	16475.1	16461.9		PAN	Latin America	y2045	645.627	644.753	645.627	632.458
PER	Latin America	y2045	115764	117063	117057	117063	116969		PER	Latin America	y2045	1298.62	1292.41	1298.62	1205.04
COL	Latin America	y2045	162283	167622	167613	167622	167488		COL	Latin America	y2045	5339.57	5330.68	5339.57	5205.58
BHS	Latin America	y2045	1241.62	1406.78	1406.71	1406.78	1405.66		BHS	Latin America	y2045	165.169	165.094	165.169	164.044
JAM	Latin America	y2045	8374.94	8529.08	8528.62	8529.08	8522.26		JAM	Latin America	y2045	154.14	153.688	154.14	147.322
CHL	Latin America	y2045	62877.9	60570.1	60566.9	60570.1	60521.7		CHL	Latin America	y2045	-2307.78	-2310.99	-2307.78	-2356.19
HTI	Latin America	y2045	35109	40652.7	40650.6	40652.7	40620.2		HTI	Latin America	y2045	5543.76	5541.6	5543.76	5511.26
BRA	Latin America	y2045	785803	691678	691642	691678	691125		BRA	Latin America	y2045	-94124.8	-94161.6	-94124.8	-94677.7
ARG	Latin America	y2045	179307	161625	161617	161625	161496		ARG	Latin America	y2045	-17681.8	-17690.4	-17681.8	-17811
VEN	Latin America	y2045	108570	110815	110809	110815	110726		VEN	Latin America	y2045	2244.72	2238.84	2244.72	2156.14
DOM	Latin America	y2045	36923.7	38833.5	38831.4	38833.5	38802.4		DOM	Latin America	y2045	1909.75	1907.69	1909.75	1878.71
BOL	Latin America	y2045	39883.6	45115.3	45112.9	45115.3	45079.2		BOL	Latin America	y2045	5231.75	5229.36	5231.75	5195.69
PRY	Latin America	y2045	25569.2	26560.5	26559.1	26560.5	26539.3		PRY	Latin America	y2045	991.323	989.914	991.323	970.092
TTO	Latin America	y2045	3558.54	3724.16	3723.96	3724.16	3721.18		TTO	Latin America	y2045	165.617	165.419	165.617	162.64
FLK	Latin America	y2045	11.8419	10.2237	10.2232	10.2237	10.2155		FLK	Latin America	y2045	-1.61821	-1.61875	-1.61821	-1.62638
GUY	Latin America	y2045	2184.08	2033.74	2033.63	2033.74	2032.11		GUY	Latin America	y2045	-150.347	-150.455	-150.347	-151.973
URY	Latin America	y2045	10964.3	10306.7	10306.2	10306.7	10298.5		URY	Latin America	y2045	-657.594	-658.141	-657.594	-665.833
SUR	Latin America	y2045	1839.3	1829.98	1829.89	1829.98	1828.52		SUR	Latin America	y2045	-9.31222	-9.40933	-9.31222	-10.775
GUF	Latin America	y2045	1309.09	1231.02	1230.95	1231.02	1230.03		GUF	Latin America	y2045	-78.0751	-78.1405	-78.0751	-79.0591
SGS	Latin America	y2045	0.40504	0.355764	0.355745	0.355764	0.35548		SGS	Latin America	y2045	-0.0492758	-0.0492947	-0.0492758	-0.0495602
MAR	Africa	y2045	155720	128603	128438	128470	128973		MAR	Africa	y2045	-27117.1	-27281.6	-27249.7	-26746.8
TUN	Africa	y2045	47113.9	39474.7	39424.2	39434.1	39588.4		TUN	Africa	y2045	-7639.19	-7689.68	-7679.87	-7525.52
SAU	Africa	y2045	149048	139483	139304	139339	139885		SAU	Africa	y2045	-9564.98	-9743.38	-9708.72	-9163.34
ISR	Africa	y2045	49692.4	40496.1	40444.3	40454.4	40612.7		ISR	Africa	y2045	-9196.28	-9248.08	-9238.01	-9079.68
JOR	Africa	y2045	49226.5	42670.3	42615.8	42626.4	42793.2		JOR	Africa	y2045	-6556.14	-6610.72	-6600.11	-6433.27
LBN	Africa	y2045	24699.2	22401.5	22372.8	22378.4	22466		LBN	Africa	y2045	-2297.77	-2326.43	-2320.86	-2233.27
SYR	Africa	y2045	88368.1	83801.2	83694	83714.8	84042.5		SYR	Africa	y2045	-4566.94	-4674.12	-4653.3	-4325.64
IRQ	Africa	y2045	178902	192417	192171	192218	192971		IRQ	Africa	y2045	13514.2	13268.1	13315.9	14068.2
YEM	Africa	y2045	116658	143840	143656	143692	144254		YEM	Africa	y2045	27181.9	26997.9	27033.7	27596.1
KWT	Africa	y2045	19201.1	16467.2	16446.2	16450.2	16514.6		KWT	Africa	y2045	-2733.89	-2754.95	-2750.86	-2686.47
QAT	Africa	y2045	15102.5	12421.2	12405.3	12408.4	12456.9		QAT	Africa	y2045	-2681.3	-2697.18	-2694.1	-2645.53
OMN	Africa	y2045	22339.8	20628.2	20601.8	20606.9	20687.6		OMN	Africa	y2045	-1711.64	-1738.03	-1732.9	-1652.25
ARE	Africa	y2045	40116.6	39733.1	39682.3	39692.2	39847.5		ARE	Africa	y2045	-383.474	-434.294	-424.42	-269.064
PAK	Asia	y2045	882465	931582	931686	931561	930419		PAK	Asia	y2045	49117.7	49220.9	49095.9	47954.8
CAN	North America	y2045	154001	136735	136674	136821	136570		CAN	North America	y2045	-17266.5	-17327.7	-17180.2	-17431.3
PRI	Latin America	y2045	10279.9	9143.55	9143.07	9143.55	9136.24		PRI	Latin America	y2045	-1136.32	-1136.8	-1136.32	-1143.63
AUS	Oceania	y2045	105750	98878.3	98834.1	98940.7	98759.1		AUS	Oceania	y2045	-6871.42	-6915.63	-6808.96	-6990.58
JPN	Asia	y2045	302075	324956	323868	324383	324905		JPN	Asia	y2045	22880.3	21792.6	22307.9	22829.9
NZL	Oceania	y2045	19089.3	18200.5	18192.3	18212	18178.5		NZL	Oceania	y2045	-888.815	-896.952	-877.318	-910.749
IDN	Asia	y2045	943406	931336	931439	931314	930173		IDN	Asia	y2045	-12070.2	-11967.1	-12092.1	-13232.8
MYS	Asia	y2045	129670	123115	123129	123113	122962		MYS	Asia	y2045	-6554.66	-6541.03	-6557.55	-6708.35
SGP	Asia	y2045	24060.1	20340.8	20343	20340.3	20315.4		SGP	Asia	y2045	-3719.38	-3717.13	-3719.86	-3744.78
BRN	Asia	y2045	1600.27	1582.37	1582.54	1582.33	1580.39		BRN	Asia	y2045	-17.8995	-17.7243	-17.9367	-19.8749
PHL	Asia	y2045	424205	419130	419177	419121	418607		PHL	Asia	y2045	-5074.08	-5027.67	-5083.93	-5597.3
TLS	Asia	y2045	5599.32	6218.46	6219.15	6218.31	6210.7		TLS	Asia	y2045	619.139	619.828	618.993	611.376
KOR	Asia	y2045	167594	148323	148340	148320	148138		KOR	Asia	y2045	-19270	-19253.6	-19273.5	-19455.2
PNG	Asia	y2045	36992.3	36856.4	36860.5	36855.6	36810.4		PNG	Asia	y2045	-135.823	-131.742	-136.689	-181.832
SLB	Asia	y2045	3101.87	3064.6	3064.94	3064.53	3060.77		SLB	Asia	y2045	-37.2663	-36.9269	-37.3383	-41.0919
NCL	Asia	y2045	956.319	975.406	975.514	975.383	974.189		NCL	Asia	y2045	19.0876	19.1956	19.0647	17.87
VUT	Asia	y2045	1508.48	1318.9	1319.05	1318.87	1317.26		VUT	Asia	y2045	-189.574	-189.428	-189.605	-191.22
FJI	Asia	y2045	2926.96	2767.77	2768.08	2767.71	2764.32		FJI	Asia	y2045	-159.189	-158.882	-159.254	-162.644
REU	Africa	y2045	3213.37	2889.12	2888.53	2888.42	2883.62		REU	Africa	y2045	-324.251	-324.84	-324.948	-329.744
LKA	Asia	y2045	64046.6	67833.7	67841.2	67832.1	67749		LKA	Asia	y2045	3787.04	3794.55	3785.45	3702.36
BGD	Asia	y2045	574700	576177	576241	576164	575458		BGD	Asia	y2045	1477.62	1541.43	1464.09	758.364
BTN	Asia	y2045	3141.19	2768.56	2768.87	2768.5	2765.11		BTN	Asia	y2045	-372.631	-372.325	-372.696	-376.087
SEN	Africa	y2050	87352.9	86917.5	86842.7	86834.9	87066		SEN	Africa	y2050	-435.425	-510.145	-518.025	-286.862
GMB	Africa	y2050	13429	12262.1	12251.6	12250.4	12283.1		GMB	Africa	y2050	-1166.91	-1177.45	-1178.56	-1145.95
MRT	Africa	y2050	24493	22368.4	22349.2	22347.2	22406.7		MRT	Africa	y2050	-2124.55	-2143.78	-2145.81	-2086.32
ESH	Africa	y2050	2469.51	2592.95	2591.5	2591.48	2616.79		ESH	Africa	y2050	123.431	121.986	121.969	147.275
GNB	Africa	y2050	8916.35	8778.92	8771.37	8770.57	8793.92		GNB	Africa	y2050	-137.438	-144.984	-145.78	-122.432
GIN	Africa	y2050	75287.1	64487	64431.6	64425.7	64597.2		GIN	Africa	y2050	-10800	-10855.5	-10861.3	-10689.8
SLE	Africa	y2050	35261.7	35946.8	35915.9	35912.7	36008.3		SLE	Africa	y2050	685.142	654.24	650.981	746.584
MLI	Africa	y2050	125132	111549	111454	111443	111740		MLI	Africa	y2050	-13582.7	-13678.6	-13688.8	-13392.1
LBR	Africa	y2050	23608.3	24971.9	24950.4	24948.1	25014.6		LBR	Africa	y2050	1363.58	1342.11	1339.84	1406.26
CIV	Africa	y2050	146501	125496	125388	125377	125711		CIV	Africa	y2050	-21004.9	-21112.8	-21124.2	-20790.4
BFA	Africa	y2050	127801	115799	115700	115689	115997		BFA	Africa	y2050	-12002.1	-12101.6	-12112.1	-11804.2
GHA	Africa	y2050	184128	146812	146685	146672	147062		GHA	Africa	y2050	-37316.6	-37442.8	-37456.2	-37065.7
TGO	Africa	y2050	38172.5	38500.8	38467.7	38464.2	38566.6		TGO	Africa	y2050	328.345	295.248	291.757	394.152
NER	Africa	y2050	181527	179906	179751	179735	180214		NER	Africa	y2050	-1620.5	-1775.16	-1791.47	-1313
BEN	Africa	y2050	64686.1	61937.2	61884	61878.3	62043.1		BEN	Africa	y2050	-2748.92	-2802.17	-2807.78	-2643.06
DZA	Africa	y2050	182430	166496	166403	166402	168027		DZA	Africa	y2050	-15934	-16026.8	-16027.9	-14403
NGA	Africa	y2050	1.19475e+06	1.15236e+06	1.15137e+06	1.15126e+06	1.15433e+06		NGA	Africa	y2050	-42389.8	-43380.5	-43484.9	-40420.2
CMR	Africa	y2050	130553	125084	124977	124965	125298		CMR	Africa	y2050	-5468.4	-5575.93	-5587.27	-5254.6
GAB	Africa	y2050	10222.5	9994.73	9986.13	9985.23	10011.8		GAB	Africa	y2050	-227.801	-236.394	-237.3	-210.718
GNQ	Africa	y2050	8021.01	7228.42	7222.2	7221.55	7240.77		GNQ	Africa	y2050	-792.592	-798.806	-799.461	-780.236
NAM	Africa	y2050	8671.23	10747.7	10738.5	10737.5	10766.1		NAM	Africa	y2050	2076.48	2067.24	2066.27	2094.85
AGO	Africa	y2050	159121	184441	184282	184266	184756		AGO	Africa	y2050	25319.4	25160.9	25144.2	25634.7
COG	Africa	y2050	23675.6	27256.5	27233.1	27230.6	27303.1		COG	Africa	y2050	3580.94	3557.51	3555.04	3627.53
COD	Africa	y2050	459268	501901	501469	501424	502759		COD	Africa	y2050	42633.1	42201.7	42156.2	43491
LBY	Africa	y2050	29062.1	25399.6	25385.5	25385.3	25633.2		LBY	Africa	y2050	-3662.51	-3676.67	-3676.84	-3428.95
TCD	Africa	y2050	77877.5	90877.3	90799.2	90791	91032.6		TCD	Africa	y2050	12999.8	12921.7	12913.4	13155.1
CAF	Africa	y2050	18576.6	20594.6	20576.9	20575	20629.8		CAF	Africa	y2050	2018.03	2000.33	1998.46	2053.23
ZAF	Africa	y2050	238816	216897	216710	216690	217267		ZAF	Africa	y2050	-21919.7	-22106.1	-22125.8	-21549
BWA	Africa	y2050	8012.55	9346.44	9338.41	9337.56	9362.42		BWA	Africa	y2050	1333.89	1325.86	1325.01	1349.87
ZMB	Africa	y2050	87728.7	108297	108204	108195	108483		ZMB	Africa	y2050	20568.8	20475.7	20465.9	20753.9
SDN	Africa	y2050	197034	209020	208903	208902	210942		SDN	Africa	y2050	11985.1	11868.6	11867.2	13907.2
ZWE	Africa	y2050	55542.7	62876.3	62822.3	62816.6	62983.8		ZWE	Africa	y2050	7333.59	7279.54	7273.84	7441.07
LSO	Africa	y2050	7772.11	7398.74	7392.38	7391.7	7411.38		LSO	Africa	y2050	-373.375	-379.736	-380.407	-360.729
BDI	Africa	y2050	51074	55905	55857	55851.9	56000.6		BDI	Africa	y2050	4830.97	4782.91	4777.84	4926.53
RWA	Africa	y2050	63697.1	66666	66608.7	66602.7	66780		RWA	Africa	y2050	2968.93	2911.62	2905.57	3082.88
TZA	Africa	y2050	312613	341100	340806	340775	341683		TZA	Africa	y2050	28486.9	28193.7	28162.8	29070
UGA	Africa	y2050	273545	285130	284885	284859	285617		UGA	Africa	y2050	11584.3	11339.2	11313.3	12071.6
MOZ	Africa	y2050	154946	155740	155607	155592	156007		MOZ	Africa	y2050	794.521	660.637	646.516	1060.72
SWZ	Africa	y2050	3856.41	4417.31	4413.51	4413.11	4424.86		SWZ	Africa	y2050	560.902	557.105	556.705	568.453
MWI	Africa	y2050	112875	116659	116559	116548	116858		MWI	Africa	y2050	3783.92	3683.63	3673.06	3983.32
ETH	Africa	y2050	525257	564312	563827	563775	565276		ETH	Africa	y2050	39054.6	38569.5	38518.4	40019.2
EGY	Africa	y2050	556302	430348	430108	430105	434305		EGY	Africa	y2050	-125954	-126194	-126197	-121997
KEN	Africa	y2050	248408	270277	270045	270020	270739		KEN	Africa	y2050	21869.4	21637.1	21612.6	22331.4
ERI	Africa	y2050	11926.9	13169.6	13158.3	13157.1	13192.1		ERI	Africa	y2050	1242.68	1231.36	1230.16	1265.19
SOM	Africa	y2050	82319.6	89261.1	89184.4	89176.3	89413.7		SOM	Africa	y2050	6941.5	6864.76	6856.67	7094.07
DJI	Africa	y2050	4187.17	4186.21	4182.61	4182.23	4193.36		DJI	Africa	y2050	-0.959515	-4.55823	-4.93778	6.19574
MDG	Africa	y2050	122276	141086	140964	140952	141327		MDG	Africa	y2050	18809.5	18688.2	18675.4	19050.7
MUS	Africa	y2050	3853.57	3405.31	3402.38	3402.07	3411.13		MUS	Africa	y2050	-448.261	-451.188	-451.497	-442.441
ATF	Asia	y2050	0.768234	0.707696	0.70785	0.707594	0.707916		ATF	Asia	y2050	-0.0605374	-0.0603834	-0.0606393	-0.060317
CHN	Asia	y2050	4.42045e+06	3.89959e+06	3.90089e+06	3.89961e+06	3.89478e+06		CHN	Asia	y2050	-520853	-519555	-520840	-525670
IND	Asia	y2050	4.88728e+06	4.92466e+06	4.92628e+06	4.92466e+06	4.91854e+06		IND	Asia	y2050	37379.3	39002.4	37379.3	31263.6
NPL	Asia	y2050	117950	113710	113735	113694	113745		NPL	Asia	y2050	-4240.28	-4215.53	-4256.66	-4204.87
MNG	Asia	y2050	11560.9	12094	12096.6	12092.2	12097.8		MNG	Asia	y2050	533.091	535.723	531.349	536.857
MMR	Asia	y2050	163506	171191	171229	171167	171245		MMR	Asia	y2050	7685.43	7722.7	7660.78	7738.75
LAO	Asia	y2050	26995.3	27512.9	27518.9	27508.9	27521.5		LAO	Asia	y2050	517.555	523.544	513.593	526.124
THA	Asia	y2050	199401	196251	196293	196222	196312		THA	Asia	y2050	-3150.14	-3107.42	-3178.4	-3089.02
KHM	Asia	y2050	66128.7	64965.5	64979.7	64956.2	64985.8		KHM	Asia	y2050	-1163.13	-1148.99	-1172.49	-1142.9
VNM	Asia	y2050	333250	317017	317086	316972	317116		VNM	Asia	y2050	-16233	-16164	-16278.7	-16134.3
RUS	Europe	y2050	468018	403983	403866	403829	403569		RUS	Europe	y2050	-64034.9	-64152.3	-64188.7	-64449.2
PRK	Asia	y2050	52734.1	75121.1	75137.4	75110.2	75144.4		PRK	Asia	y2050	22387	22403.3	22376.2	22410.4
GRL	Europe	y2050	182.185	157.589	157.566	157.544	157.359		GRL	Europe	y2050	-24.5954	-24.6191	-24.6407	-24.8254
ISL	Europe	y2050	1427.87	1260.83	1260.64	1260.47	1258.99		ISL	Europe	y2050	-167.04	-167.229	-167.402	-168.88
ESP	Europe	y2050	155585	143946	143963	143928	143870		ESP	Europe	y2050	-11638.9	-11621.6	-11657.1	-11714.7
IRL	Europe	y2050	21198.1	17167.7	17169.7	17165.5	17158.6		IRL	Europe	y2050	-4030.46	-4028.4	-4032.64	-4039.5
PRT	Europe	y2050	32406.8	26955	26958.2	26951.6	26940.8		PRT	Europe	y2050	-5451.84	-5448.6	-5455.25	-5466.03
GBR	Europe	y2050	259572	223939	223966	223911	223821		GBR	Europe	y2050	-35633.3	-35606.4	-35661.6	-35751.2
FRA	Europe	y2050	272965	224571	224598	224543	224453		FRA	Europe	y2050	-48393.9	-48366.9	-48422.3	-48512.1
BEL	Europe	y2050	47772.2	37731.4	37735.9	37726.6	37711.5		BEL	Europe	y2050	-10040.8	-10036.3	-10045.6	-10060.7
NLD	Europe	y2050	59880.8	55043.8	55050.4	55036.9	55014.8		NLD	Europe	y2050	-4836.94	-4830.34	-4843.91	-4865.92
NOR	Europe	y2050	22803.2	19308.8	19305.9	19303.2	19280.6		NOR	Europe	y2050	-3494.45	-3497.35	-3499.99	-3522.63
LUX	Europe	y2050	2985.83	2521.06	2521.36	2520.74	2519.73		LUX	Europe	y2050	-464.772	-464.47	-465.092	-466.1
DEU	Europe	y2050	288584	244214	244244	244184	244086		DEU	Europe	y2050	-44369.3	-44340	-44400.3	-44497.9
CHE	Europe	y2050	34973.5	30058.4	30053.9	30049.8	30014.6		CHE	Europe	y2050	-4915.1	-4919.62	-4923.73	-4958.97
ITA	Europe	y2050	204136	166805	166825	166784	166718		ITA	Europe	y2050	-37330.9	-37310.9	-37352	-37418.7
DNK	Europe	y2050	22100	19071.1	19073.3	19068.6	19061		DNK	Europe	y2050	-3028.9	-3026.61	-3031.31	-3038.94
AUT	Europe	y2050	35274.8	28125.4	28128.8	28121.8	28110.6		AUT	Europe	y2050	-7149.43	-7146.06	-7153	-7164.24
SWE	Europe	y2050	38527.8	36170.6	36174.9	36166	36151.6		SWE	Europe	y2050	-2357.19	-2352.85	-2361.77	-2376.24
CZE	Europe	y2050	34397.3	30385.2	30388.8	30381.3	30369.2		CZE	Europe	y2050	-4012.08	-4008.43	-4015.93	-4028.08
HRV	Europe	y2050	10792.4	10421.5	10422.8	10420.2	10416		HRV	Europe	y2050	-370.882	-369.632	-372.202	-376.37
SVN	Europe	y2050	6777.59	6257.37	6258.12	6256.58	6254.08		SVN	Europe	y2050	-520.213	-519.463	-521.006	-523.508
SJM	Europe	y2050	9.09385	7.95237	7.95118	7.95009	7.94077		SJM	Europe	y2050	-1.14148	-1.14268	-1.14376	-1.15309
POL	Europe	y2050	119094	100982	100995	100970	100929		POL	Europe	y2050	-18111.8	-18099.7	-18124.6	-18165
BIH	Europe	y2050	7199.21	6452.01	6451.04	6450.15	6442.59		BIH	Europe	y2050	-747.208	-748.178	-749.061	-756.625
HUN	Europe	y2050	27605.9	25667.7	25670.7	25664.4	25654.1		HUN	Europe	y2050	-1938.19	-1935.11	-1941.44	-1951.71
SVK	Europe	y2050	15069.5	14933.2	14935	14931.3	14925.4		SVK	Europe	y2050	-136.242	-134.45	-138.133	-144.105
MNE	Europe	y2050	2158.63	1767.81	1767.54	1767.3	1765.23		MNE	Europe	y2050	-390.822	-391.088	-391.33	-393.402
SRB	Europe	y2050	20834	21525	21521.8	21518.8	21493.6		SRB	Europe	y2050	690.984	687.749	684.802	659.568
ALB	Europe	y2050	7311.54	6534.14	6533.16	6532.27	6524.61		ALB	Europe	y2050	-777.395	-778.377	-779.272	-786.932
GRC	Europe	y2050	36444.4	30815.2	30818.9	30811.3	30798.9		GRC	Europe	y2050	-5629.21	-5625.51	-5633.11	-5645.44
MKD	Europe	y2050	5679.93	5334.32	5333.52	5332.79	5326.54		MKD	Europe	y2050	-345.607	-346.409	-347.139	-353.393
ROU	Europe	y2050	52340.2	44630.7	44636	44625	44607.2		ROU	Europe	y2050	-7709.52	-7704.16	-7715.17	-7733.02
LTU	Europe	y2050	7688.58	6634.86	6635.65	6634.02	6631.36		LTU	Europe	y2050	-1053.72	-1052.93	-1054.56	-1057.22
LVA	Europe	y2050	5300.8	4790.84	4791.42	4790.23	4788.32		LVA	Europe	y2050	-509.961	-509.386	-510.568	-512.484
FIN	Europe	y2050	18802.7	16850.7	16852.7	16848.6	16841.8		FIN	Europe	y2050	-1951.99	-1949.97	-1954.12	-1960.86
EST	Europe	y2050	4343.12	3731.53	3731.98	3731.06	3729.57		EST	Europe	y2050	-611.584	-611.136	-612.057	-613.549
BGR	Europe	y2050	15152.7	15297.4	15299.2	15295.5	15289.3		BGR	Europe	y2050	144.705	146.54	142.767	136.65
BLR	Europe	y2050	28849.4	25757.9	25750.4	25748	25731.4		BLR	Europe	y2050	-3091.57	-3099.05	-3101.38	-3117.98
TUR	Europe	y2050	380526	288778	288734	288695	288356		TUR	Europe	y2050	-91747.7	-91791.1	-91830.7	-92169.2
MDA	Europe	y2050	6845.7	6760.82	6758.85	6758.24	6753.88		MDA	Europe	y2050	-84.8807	-86.8457	-87.4555	-91.8146
CYP	Europe	y2050	3818.5	4168.45	4168.95	4167.92	4166.25		CYP	Europe	y2050	349.943	350.443	349.415	347.748
IRN	Africa	y2050	315849	295323	295159	295157	298039		IRN	Africa	y2050	-20525.4	-20690	-20692	-17809.7
UKR	Europe	y2050	127853	113029	112996	112986	112913		UKR	Europe	y2050	-14824.8	-14857.6	-14867.8	-14940.7
GEO	Europe	y2050	8582.34	8199.44	8197.06	8196.32	8191.03		GEO	Europe	y2050	-382.897	-385.28	-386.02	-391.306
ARM	Europe	y2050	7800.48	7678.49	7676.26	7675.56	7670.61		ARM	Europe	y2050	-121.989	-124.22	-124.913	-129.864
AZE	Europe	y2050	32300.3	32062	32052.7	32049.8	32029.1		AZE	Europe	y2050	-238.343	-247.661	-250.553	-271.226
KAZ	Europe	y2050	69299.2	61185.6	61167.8	61162.3	61122.8		KAZ	Europe	y2050	-8113.58	-8131.37	-8136.89	-8176.34
TKM	Europe	y2050	25010.3	22788	22781.3	22779.3	22764.6		TKM	Europe	y2050	-2222.31	-2228.94	-2230.99	-2245.69
UZB	Europe	y2050	131707	127720	127683	127671	127589		UZB	Europe	y2050	-3987.51	-4024.63	-4036.15	-4118.5
AFG	Asia	y2050	191358	222677	222725	222645	222746		AFG	Asia	y2050	31318.8	31367.3	31286.7	31388.1
TJK	Europe	y2050	37116.1	40298.9	40287.2	40283.5	40257.6		TJK	Europe	y2050	3182.79	3171.07	3167.44	3141.46
KGZ	Europe	y2050	27219.6	24745.8	24738.6	24736.4	24720.5		KGZ	Europe	y2050	-2473.74	-2480.93	-2483.16	-2499.12
MEX	Latin America	y2050	514942	462035	462046	461997	462049		MEX	Latin America	y2050	-52907	-52896.2	-52945.7	-52893.1
USA	North America	y2050	1.43933e+06	1.16392e+06	1.16429e+06	1.16391e+06	1.16257e+06		USA	North America	y2050	-275409	-275037	-275421	-276766
GTM	Latin America	y2050	70793.1	71999.8	72001.4	71993.7	72001.9		GTM	Latin America	y2050	1206.68	1208.37	1200.65	1208.85
ECU	Latin America	y2050	61267.6	67853.3	67854.9	67847.6	67855.4		ECU	Latin America	y2050	6585.75	6587.34	6580.06	6587.8
SLV	Latin America	y2050	19063.9	19712.8	19713.2	19711.1	19713.4		SLV	Latin America	y2050	648.922	649.385	647.27	649.517
HND	Latin America	y2050	42398.2	40505.9	40506.9	40502.6	40507.2		HND	Latin America	y2050	-1892.25	-1891.29	-1895.64	-1891.02
BLZ	Latin America	y2050	1743.85	1643.02	1643.06	1642.89	1643.07		BLZ	Latin America	y2050	-100.83	-100.791	-100.967	-100.78
NIC	Latin America	y2050	23733.1	23543.1	23543.7	23541.1	23543.8		NIC	Latin America	y2050	-190.024	-189.472	-191.997	-189.314
CRI	Latin America	y2050	18273.3	17654.8	17655.2	17653.3	17655.4		CRI	Latin America	y2050	-618.487	-618.073	-619.966	-617.954
CUB	Latin America	y2050	31525.6	28184.8	28185.5	28182.4	28185.7		CUB	Latin America	y2050	-3340.81	-3340.15	-3343.18	-3339.96
PAN	Latin America	y2050	16335	16710	16710.4	16708.6	16710.5		PAN	Latin America	y2050	374.996	375.388	373.596	375.5
PER	Latin America	y2050	118474	117433	117436	117423	117436		PER	Latin America	y2050	-1041.18	-1038.42	-1051.02	-1037.64
COL	Latin America	y2050	163459	165884	165888	165870	165889		COL	Latin America	y2050	2425.32	2429.21	2411.42	2430.33
BHS	Latin America	y2050	1270.42	1421.71	1421.75	1421.59	1421.75		BHS	Latin America	y2050	151.292	151.325	151.173	151.335
JAM	Latin America	y2050	8186.14	8157.86	8158.05	8157.18	8158.11		JAM	Latin America	y2050	-28.2793	-28.0878	-28.9629	-28.0331
CHL	Latin America	y2050	63084.9	59807	59808.4	59802	59808.8		CHL	Latin America	y2050	-3277.82	-3276.42	-3282.83	-3276.02
HTI	Latin America	y2050	36417.3	40484.4	40485.4	40481	40485.6		HTI	Latin America	y2050	4067.08	4068.03	4063.69	4068.31
BRA	Latin America	y2050	786433	681403	681419	681346	681424		BRA	Latin America	y2050	-105030	-105014	-105087	-105009
ARG	Latin America	y2050	184325	163385	163389	163371	163390		ARG	Latin America	y2050	-20940	-20936.2	-20953.7	-20935.1
VEN	Latin America	y2050	112019	111950	111953	111941	111953		VEN	Latin America	y2050	-69.189	-66.562	-78.5711	-65.8115
DOM	Latin America	y2050	37754.5	39040.5	39041.4	39037.2	39041.6		DOM	Latin America	y2050	1285.95	1286.86	1282.67	1287.12
BOL	Latin America	y2050	41860.5	45924	45925.1	45920.1	45925.4		BOL	Latin America	y2050	4063.52	4064.59	4059.67	4064.9
PRY	Latin America	y2050	26410.8	26864	26864.6	26861.8	26864.8		PRY	Latin America	y2050	453.233	453.864	450.982	454.044
TTO	Latin America	y2050	3390.72	3514.29	3514.37	3514	3514.4		TTO	Latin America	y2050	123.568	123.651	123.274	123.674
FLK	Latin America	y2050	11.6178	9.9605	9.96074	9.95967	9.9608		FLK	Latin America	y2050	-1.65728	-1.65705	-1.65812	-1.65698
GUY	Latin America	y2050	2057.09	1884.65	1884.7	1884.5	1884.71		GUY	Latin America	y2050	-172.437	-172.392	-172.595	-172.38
URY	Latin America	y2050	10828.3	10013.6	10013.8	10012.7	10013.9		URY	Latin America	y2050	-814.755	-814.52	-815.594	-814.453
SUR	Latin America	y2050	1831.15	1780.49	1780.53	1780.34	1780.54		SUR	Latin America	y2050	-50.6597	-50.6179	-50.8089	-50.606
GUF	Latin America	y2050	1390.62	1296.43	1296.47	1296.33	1296.47		GUF	Latin America	y2050	-94.1846	-94.1542	-94.2932	-94.1455
SGS	Latin America	y2050	0.405124	0.352003	0.352012	0.351974	0.352014		SGS	Latin America	y2050	-0.0531203	-0.053112	-0.0531498	-0.0531097
MAR	Africa	y2050	158132	127633	127562	127561	128807		MAR	Africa	y2050	-30498.7	-30569.8	-30570.6	-29325
TUN	Africa	y2050	47477.1	39076	39054.3	39054	39435.4		TUN	Africa	y2050	-8401.01	-8422.79	-8423.05	-8041.68
SAU	Africa	y2050	154581	142877	142798	142797	144191		SAU	Africa	y2050	-11703.8	-11783.4	-11784.3	-10389.9
ISR	Africa	y2050	53401.9	42805.6	42781.7	42781.5	43199.2		ISR	Africa	y2050	-10596.3	-10620.2	-10620.5	-10202.7
JOR	Africa	y2050	52860.9	44732.9	44708	44707.7	45144.3		JOR	Africa	y2050	-8127.96	-8152.89	-8153.19	-7716.61
LBN	Africa	y2050	25614.8	22719.1	22706.4	22706.2	22928		LBN	Africa	y2050	-2895.72	-2908.38	-2908.54	-2686.8
SYR	Africa	y2050	91456.5	84003.7	83956.9	83956.3	84776.2		SYR	Africa	y2050	-7452.85	-7499.67	-7500.23	-6680.38
IRQ	Africa	y2050	191941	202146	202034	202032	204005		IRQ	Africa	y2050	10205.5	10092.8	10091.5	12064.4
YEM	Africa	y2050	128652	151936	151851	151850	153333		YEM	Africa	y2050	23284.4	23199.7	23198.7	24681.6
KWT	Africa	y2050	19774.9	16735.6	16726.3	16726.2	16889.5		KWT	Africa	y2050	-3039.26	-3048.59	-3048.7	-2885.36
QAT	Africa	y2050	15767.2	12890.7	12883.5	12883.5	13009.3		QAT	Africa	y2050	-2876.51	-2883.69	-2883.78	-2757.97
OMN	Africa	y2050	23180.5	21113.4	21101.6	21101.5	21307.5		OMN	Africa	y2050	-2067.11	-2078.88	-2079.02	-1872.96
ARE	Africa	y2050	41391.6	40758.3	40735.6	40735.3	41133.1		ARE	Africa	y2050	-633.244	-655.959	-656.233	-258.445
PAK	Asia	y2050	936573	976689	976901	976548	976993		PAK	Asia	y2050	40115.2	40327.8	39974.5	40419.4
CAN	North America	y2050	157690	136236	136279	136236	136075		CAN	North America	y2050	-21453.6	-21410.9	-21454	-21614.6
PRI	Latin America	y2050	9960.76	8753.65	8753.85	8752.91	8753.91		PRI	Latin America	y2050	-1207.11	-1206.91	-1207.85	-1206.85
AUS	Oceania	y2050	109869	99874.6	99905.9	99874.3	99756.6		AUS	Oceania	y2050	-9994.5	-9963.25	-9994.84	-10112.5
JPN	Asia	y2050	293350	319363	318880	319361	318989		JPN	Asia	y2050	26012.8	25530	26010.6	25639.6
NZL	Oceania	y2050	19549.2	18083.5	18089.2	18083.4	18062.1		NZL	Oceania	y2050	-1465.68	-1460.02	-1465.74	-1487.06
IDN	Asia	y2050	954504	936535	936738	936400	936826		IDN	Asia	y2050	-17969.6	-17765.8	-18104.5	-17678
MYS	Asia	y2050	134410	127419	127446	127400	127458		MYS	Asia	y2050	-6990.99	-6963.25	-7009.34	-6951.3
SGP	Asia	y2050	24654.8	20878.1	20882.6	20875.1	20884.6		SGP	Asia	y2050	-3776.7	-3772.15	-3779.71	-3770.2
BRN	Asia	y2050	1636.06	1622.26	1622.61	1622.02	1622.76		BRN	Asia	y2050	-13.8057	-13.4525	-14.0393	-13.3004
PHL	Asia	y2050	442525	432986	433080	432924	433121		PHL	Asia	y2050	-9538.7	-9444.45	-9601.05	-9403.85
TLS	Asia	y2050	6203.33	6650.85	6652.3	6649.89	6652.92		TLS	Asia	y2050	447.516	448.964	446.558	449.588
KOR	Asia	y2050	163214	144380	144411	144359	144425		KOR	Asia	y2050	-18833.8	-18802.3	-18854.5	-18788.8
PNG	Asia	y2050	39458.9	38289.8	38298.1	38284.3	38301.7		PNG	Asia	y2050	-1169.13	-1160.79	-1174.64	-1157.2
SLB	Asia	y2050	3340.5	3219.05	3219.75	3218.59	3220.05		SLB	Asia	y2050	-121.446	-120.745	-121.909	-120.443
NCL	Asia	y2050	979.778	1002.41	1002.63	1002.27	1002.72		NCL	Asia	y2050	22.6337	22.8519	22.4893	22.9459
VUT	Asia	y2050	1609.63	1377.56	1377.86	1377.36	1377.99		VUT	Asia	y2050	-232.067	-231.767	-232.265	-231.638
FJI	Asia	y2050	2908.3	2727.9	2728.5	2727.51	2728.75		FJI	Asia	y2050	-180.394	-179.801	-180.787	-179.545
REU	Africa	y2050	3243.82	2961.99	2959.44	2959.17	2967.05		REU	Africa	y2050	-281.834	-284.38	-284.649	-276.771
LKA	Asia	y2050	64294.4	67377.3	67392	67367.6	67398.3		LKA	Asia	y2050	3082.92	3097.58	3073.21	3103.9
BGD	Asia	y2050	586912	582557	582684	582474	582739		BGD	Asia	y2050	-4355	-4228.19	-4438.89	-4173.57
BTN	Asia	y2050	3225.28	2825.72	2826.33	2825.31	2826.6		BTN	Asia	y2050	-399.563	-398.948	-399.97	-398.683
SEN	Africa	y2055	94708.5	92470.4	92442.3	92419.7	92603.5		SEN	Africa	y2055	-2238.11	-2266.22	-2288.77	-2104.97
GMB	Africa	y2055	14418.4	12936.1	12932.2	12929.1	12954.8		GMB	Africa	y2055	-1482.28	-1486.21	-1489.36	-1463.65
MRT	Africa	y2055	25938.9	23488.1	23481	23475.3	23521.9		MRT	Africa	y2055	-2450.76	-2457.9	-2463.63	-2416.94
ESH	Africa	y2055	2628.33	2743.78	2742.11	2742.15	2768.9		ESH	Africa	y2055	115.448	113.782	113.819	140.565
GNB	Africa	y2055	9471.33	9079.67	9076.91	9074.69	9092.74		GNB	Africa	y2055	-391.665	-394.425	-396.64	-378.592
GIN	Africa	y2055	80653.2	67725.8	67705.3	67688.7	67823.4		GIN	Africa	y2055	-12927.3	-12947.9	-12964.4	-12829.8
SLE	Africa	y2055	37660.7	37385.7	37374.4	37365.2	37439.6		SLE	Africa	y2055	-275.009	-286.374	-295.491	-221.179
MLI	Africa	y2055	136283	118895	118859	118830	119066		MLI	Africa	y2055	-17387.7	-17423.9	-17452.9	-17216.5
LBR	Africa	y2055	25595.3	26300.9	26293	26286.5	26338.8		LBR	Africa	y2055	705.627	697.631	691.217	743.496
CIV	Africa	y2055	155816	131736	131696	131664	131926		CIV	Africa	y2055	-24079.8	-24119.8	-24151.9	-23890.1
BFA	Africa	y2055	140120	124276	124238	124208	124455		BFA	Africa	y2055	-15844.4	-15882.2	-15912.5	-15665.5
GHA	Africa	y2055	197042	154875	154828	154790	155098		GHA	Africa	y2055	-42167.1	-42214.2	-42252	-41944.1
TGO	Africa	y2055	40777.6	40177.3	40165.1	40155.3	40235.2		TGO	Africa	y2055	-600.343	-612.557	-622.355	-542.494
NER	Africa	y2055	209787	202361	202300	202251	202653		NER	Africa	y2055	-7425.19	-7486.7	-7536.06	-7133.82
BEN	Africa	y2055	69667.2	65546.1	65526.2	65510.2	65640.5		BEN	Africa	y2055	-4121.13	-4141.06	-4157.04	-4026.75
DZA	Africa	y2055	186529	169303	169200	169202	170853		DZA	Africa	y2055	-17225.7	-17328.5	-17326.2	-15675.9
NGA	Africa	y2055	1.31958e+06	1.2519e+06	1.25152e+06	1.25122e+06	1.25371e+06		NGA	Africa	y2055	-67678.8	-68059.4	-68364.7	-65876.2
CMR	Africa	y2055	138427	130758	130718	130686	130946		CMR	Africa	y2055	-7668.45	-7708.2	-7740.09	-7480.18
GAB	Africa	y2055	10679.4	10421.7	10418.5	10416	10436.7		GAB	Africa	y2055	-257.728	-260.897	-263.438	-242.723
GNQ	Africa	y2055	8504.53	7624.42	7622.11	7620.25	7635.4		GNQ	Africa	y2055	-880.109	-882.427	-884.287	-869.131
NAM	Africa	y2055	9057.04	11120.3	11116.9	11114.2	11136.3		NAM	Africa	y2055	2063.28	2059.9	2057.19	2079.29
AGO	Africa	y2055	173986	197056	196996	196948	197340		AGO	Africa	y2055	23069.4	23009.5	22961.4	23353.1
COG	Africa	y2055	25422.1	28702	28693.3	28686.3	28743.3		COG	Africa	y2055	3279.88	3271.16	3264.16	3321.21
COD	Africa	y2055	508470	536987	536824	536693	537760		COD	Africa	y2055	28517.1	28353.8	28222.8	29290.2
LBY	Africa	y2055	29591.4	25786.4	25770.7	25771.1	26022.4		LBY	Africa	y2055	-3805.05	-3820.71	-3820.36	-3569
TCD	Africa	y2055	86060.1	97209.1	97179.6	97155.9	97349.1		TCD	Africa	y2055	11149.1	11119.5	11095.8	11289
CAF	Africa	y2055	19740.7	21218.5	21212	21206.9	21249		CAF	Africa	y2055	1477.75	1471.3	1466.13	1508.3
ZAF	Africa	y2055	243486	220609	220542	220488	220926		ZAF	Africa	y2055	-22877.3	-22944.4	-22998.2	-22559.7
BWA	Africa	y2055	8192.38	9528.61	9525.72	9523.39	9542.33		BWA	Africa	y2055	1336.23	1333.34	1331.01	1349.95
ZMB	Africa	y2055	97831.9	117201	117166	117137	117370		ZMB	Africa	y2055	19369.4	19333.8	19305.2	19538.2
SDN	Africa	y2055	209554	218329	218196	218199	220327		SDN	Africa	y2055	8774.79	8642.24	8645.17	10773.4
ZWE	Africa	y2055	58997	64895.8	64876.1	64860.3	64989.3		ZWE	Africa	y2055	5898.81	5879.08	5863.25	5992.25
LSO	Africa	y2055	7999.65	7463.22	7460.95	7459.13	7473.97		LSO	Africa	y2055	-536.429	-538.698	-540.518	-525.683
BDI	Africa	y2055	54768.5	57989	57971.4	57957.3	58072.5		BDI	Africa	y2055	3220.57	3202.94	3188.8	3304.07
RWA	Africa	y2055	69305.3	70898.3	70876.7	70859.4	71000.3		RWA	Africa	y2055	1592.98	1571.42	1554.13	1695.06
TZA	Africa	y2055	344393	367275	367163	367074	367804		TZA	Africa	y2055	22882.1	22770.5	22680.9	23411
UGA	Africa	y2055	309112	313159	313063	312987	313609		UGA	Africa	y2055	4046.66	3951.46	3875.08	4497.56
MOZ	Africa	y2055	167516	163677	163627	163587	163912		MOZ	Africa	y2055	-3838.79	-3888.55	-3928.47	-3603.12
SWZ	Africa	y2055	3970.03	4511.42	4510.04	4508.94	4517.91		SWZ	Africa	y2055	541.387	540.016	538.916	547.883
MWI	Africa	y2055	127538	127752	127713	127682	127936		MWI	Africa	y2055	213.601	174.763	143.608	397.544
ETH	Africa	y2055	564993	592018	591838	591694	592870		ETH	Africa	y2055	27025	26845	26700.6	27877.4
EGY	Africa	y2055	577490	444045	443775	443781	448109		EGY	Africa	y2055	-133445	-133715	-133709	-129380
KEN	Africa	y2055	269162	286625	286538	286468	287038		KEN	Africa	y2055	17463.1	17376	17306.1	17875.8
ERI	Africa	y2055	12584.2	13767.8	13763.7	13760.3	13787.7		ERI	Africa	y2055	1183.61	1179.43	1176.07	1203.44
SOM	Africa	y2055	87497.8	95576.9	95547.8	95524.5	95714.5		SOM	Africa	y2055	8079.03	8049.97	8026.66	8216.64
DJI	Africa	y2055	4388.95	4358.34	4357.02	4355.95	4364.62		DJI	Africa	y2055	-30.6122	-31.9371	-33	-24.3368
MDG	Africa	y2055	133402	149678	149632	149596	149893		MDG	Africa	y2055	16275.8	16230.3	16193.8	16491.3
MUS	Africa	y2055	3730.25	3306.74	3305.74	3304.93	3311.51		MUS	Africa	y2055	-423.51	-424.515	-425.322	-418.749
ATF	Asia	y2055	0.757636	0.699357	0.699498	0.699226	0.699598		ATF	Asia	y2055	-0.0582784	-0.058138	-0.0584094	-0.0580374
CHN	Asia	y2055	4.26862e+06	3.75931e+06	3.76055e+06	3.75932e+06	3.75465e+06		CHN	Asia	y2055	-509316	-508077	-509304	-513973
IND	Asia	y2055	4.97495e+06	4.9588e+06	4.96041e+06	4.95878e+06	4.95267e+06		IND	Asia	y2055	-16148.9	-14530.9	-16165.4	-22273.9
NPL	Asia	y2055	122081	115939	115963	115918	115979		NPL	Asia	y2055	-6141.95	-6118.67	-6163.67	-6101.99
MNG	Asia	y2055	11823.1	12265.7	12268.1	12263.4	12269.9		MNG	Asia	y2055	442.604	445.066	440.305	446.831
MMR	Asia	y2055	162379	168354	168387	168322	168412		MMR	Asia	y2055	5974.45	6008.25	5942.91	6032.47
LAO	Asia	y2055	27577.6	27831.6	27837.2	27826.4	27841.2		LAO	Asia	y2055	253.964	259.551	248.749	263.555
THA	Asia	y2055	194548	190416	190454	190380	190481		THA	Asia	y2055	-4132.31	-4094.08	-4167.99	-4066.69
KHM	Asia	y2055	68240.7	66212.2	66225.4	66199.7	66235		KHM	Asia	y2055	-2028.54	-2015.25	-2040.94	-2005.72
VNM	Asia	y2055	332476	314414	314477	314355	314522		VNM	Asia	y2055	-18062.6	-17999.5	-18121.5	-17954.2
RUS	Europe	y2055	467909	401917	401857	401819	401482		RUS	Europe	y2055	-65991.6	-66052	-66089.6	-66426.4
PRK	Asia	y2055	50917.7	73321.5	73336.2	73307.7	73346.7		PRK	Asia	y2055	22403.8	22418.5	22390.1	22429.1
GRL	Europe	y2055	178.237	154.207	154.188	154.166	153.983		GRL	Europe	y2055	-24.0308	-24.0498	-24.072	-24.2548
ISL	Europe	y2055	1450.98	1281.24	1281.08	1280.9	1279.38		ISL	Europe	y2055	-169.737	-169.895	-170.079	-171.598
ESP	Europe	y2055	155957	143726	143742	143708	143643		ESP	Europe	y2055	-12230.5	-12214.2	-12248.7	-12313.8
IRL	Europe	y2055	21491.5	17380.3	17382.2	17378.1	17370.2		IRL	Europe	y2055	-4111.22	-4109.25	-4113.42	-4121.3
PRT	Europe	y2055	31562.2	26178.1	26181.1	26174.8	26162.9		PRT	Europe	y2055	-5384.14	-5381.17	-5387.45	-5399.32
GBR	Europe	y2055	264029	227409	227434	227380	227277		GBR	Europe	y2055	-36620.8	-36595.1	-36649.6	-36752.7
FRA	Europe	y2055	278014	227976	228002	227947	227844		FRA	Europe	y2055	-50037.4	-50011.6	-50066.3	-50169.6
BEL	Europe	y2055	48431.2	38165.3	38169.6	38160.4	38143.1		BEL	Europe	y2055	-10265.9	-10261.6	-10270.7	-10288
NLD	Europe	y2055	60268.3	55280	55286.2	55273	55247.9		NLD	Europe	y2055	-4988.39	-4982.13	-4995.39	-5020.44
NOR	Europe	y2055	23363.2	19789.5	19787	19784.2	19760.7		NOR	Europe	y2055	-3573.78	-3576.23	-3579.07	-3602.53
LUX	Europe	y2055	3104.82	2623.8	2624.09	2623.46	2622.28		LUX	Europe	y2055	-481.028	-480.731	-481.36	-482.549
DEU	Europe	y2055	287730	243218	243246	243187	243077		DEU	Europe	y2055	-44511.4	-44483.9	-44542.2	-44652.5
CHE	Europe	y2055	35745.4	30716.4	30712.6	30708.2	30671.7		CHE	Europe	y2055	-5029.03	-5032.82	-5037.23	-5073.64
ITA	Europe	y2055	201504	164035	164053	164014	163939		ITA	Europe	y2055	-37469.8	-37451.2	-37490.5	-37564.9
DNK	Europe	y2055	22440.6	19343.2	19345.4	19340.7	19332		DNK	Europe	y2055	-3097.4	-3095.2	-3099.84	-3108.61
AUT	Europe	y2055	35502	28311.2	28314.4	28307.6	28294.7		AUT	Europe	y2055	-7190.82	-7187.61	-7194.4	-7207.23
SWE	Europe	y2055	39594.1	37188.2	37192.4	37183.5	37166.6		SWE	Europe	y2055	-2405.92	-2401.7	-2410.62	-2427.48
CZE	Europe	y2055	34071.9	30055.6	30059	30051.8	30038.2		CZE	Europe	y2055	-4016.26	-4012.85	-4020.06	-4033.68
HRV	Europe	y2055	10569.3	10181.4	10182.6	10180.1	10175.5		HRV	Europe	y2055	-387.913	-386.76	-389.203	-393.817
SVN	Europe	y2055	6794.51	6254.27	6254.98	6253.48	6250.65		SVN	Europe	y2055	-540.238	-539.529	-541.03	-543.864
SJM	Europe	y2055	9.10264	7.9634	7.96242	7.96128	7.95184		SJM	Europe	y2055	-1.13923	-1.14022	-1.14136	-1.1508
POL	Europe	y2055	115905	98324.2	98335.3	98311.7	98267.2		POL	Europe	y2055	-17580.4	-17569.3	-17592.9	-17637.4
BIH	Europe	y2055	6522.41	5819.19	5818.47	5817.64	5810.74		BIH	Europe	y2055	-703.223	-703.941	-704.777	-711.675
HUN	Europe	y2055	27059.7	25110.8	25113.6	25107.6	25096.2		HUN	Europe	y2055	-1948.88	-1946.04	-1952.06	-1963.44
SVK	Europe	y2055	14733.6	14602.7	14604.4	14600.9	14594.3		SVK	Europe	y2055	-130.856	-129.201	-132.705	-139.323
MNE	Europe	y2055	2134.95	1742.15	1741.93	1741.68	1739.62		MNE	Europe	y2055	-392.803	-393.019	-393.269	-395.334
SRB	Europe	y2055	20168.6	20802	20799.4	20796.4	20771.8		SRB	Europe	y2055	633.391	630.821	627.834	603.176
ALB	Europe	y2055	6820.8	6085.1	6084.35	6083.47	6076.26		ALB	Europe	y2055	-735.703	-736.455	-737.328	-744.541
GRC	Europe	y2055	36379.8	30598.3	30601.8	30594.4	30580.5		GRC	Europe	y2055	-5781.49	-5778.02	-5785.36	-5799.23
MKD	Europe	y2055	5479.89	5131.62	5130.98	5130.25	5124.16		MKD	Europe	y2055	-348.267	-348.901	-349.638	-355.721
ROU	Europe	y2055	49536.4	42109.1	42113.9	42103.8	42084.7		ROU	Europe	y2055	-7427.27	-7422.5	-7432.61	-7451.69
LTU	Europe	y2055	7404.82	6397.65	6398.37	6396.84	6393.94		LTU	Europe	y2055	-1007.18	-1006.45	-1007.99	-1010.88
LVA	Europe	y2055	5228.87	4716.46	4717	4715.87	4713.73		LVA	Europe	y2055	-512.406	-511.872	-513.003	-515.141
FIN	Europe	y2055	18909.2	16925.7	16927.6	16923.5	16915.9		FIN	Europe	y2055	-1983.47	-1981.56	-1985.62	-1993.29
EST	Europe	y2055	4339.45	3715.65	3716.07	3715.18	3713.49		EST	Europe	y2055	-623.803	-623.382	-624.273	-625.957
BGR	Europe	y2055	14409.4	14470	14471.6	14468.2	14461.6		BGR	Europe	y2055	60.555	62.1945	58.7228	52.1651
BLR	Europe	y2055	28601.5	25422.5	25418.7	25416.4	25395		BLR	Europe	y2055	-3178.91	-3182.73	-3185.11	-3206.41
TUR	Europe	y2055	382967	289729	289693	289652	289308		TUR	Europe	y2055	-93237.6	-93273.4	-93315	-93658.4
MDA	Europe	y2055	6675.9	6556.18	6555.19	6554.58	6549.09		MDA	Europe	y2055	-119.724	-120.709	-121.322	-126.816
CYP	Europe	y2055	3880.98	4238.3	4238.78	4237.76	4235.84		CYP	Europe	y2055	357.321	357.801	356.784	354.864
IRN	Africa	y2055	318107	296342	296162	296166	299055		IRN	Africa	y2055	-21765.1	-21945	-21941	-19052.3
UKR	Europe	y2055	126378	110823	110807	110796	110704		UKR	Europe	y2055	-15554.3	-15570.9	-15581.3	-15674.2
GEO	Europe	y2055	8082.95	7680.31	7679.16	7678.44	7672.01		GEO	Europe	y2055	-402.64	-403.794	-404.512	-410.948
ARM	Europe	y2055	7534.08	7390.67	7389.56	7388.86	7382.67		ARM	Europe	y2055	-143.418	-144.529	-145.22	-151.413
AZE	Europe	y2055	32076.1	31666.8	31662.1	31659.1	31632.6		AZE	Europe	y2055	-409.264	-414.022	-416.982	-443.521
KAZ	Europe	y2055	69208.2	60937	60927.9	60922.2	60871.1		KAZ	Europe	y2055	-8271.17	-8280.32	-8286.02	-8337.09
TKM	Europe	y2055	25448	23120.6	23117.2	23115	23095.6		TKM	Europe	y2055	-2327.33	-2330.8	-2332.96	-2352.34
UZB	Europe	y2055	134156	129251	129232	129220	129112		UZB	Europe	y2055	-4904.26	-4923.68	-4935.76	-5044.08
AFG	Asia	y2055	213938	240246	240294	240201	240329		AFG	Asia	y2055	26308.4	26356.7	26263.4	26391.2
TJK	Europe	y2055	38650.6	41250.1	41243.9	41240.1	41205.5		TJK	Europe	y2055	2599.47	2593.28	2589.42	2554.85
KGZ	Europe	y2055	27906	25045.4	25041.7	25039.3	25018.3		KGZ	Europe	y2055	-2860.63	-2864.4	-2866.74	-2887.73
MEX	Latin America	y2055	522389	466022	466068	465991	466018		MEX	Latin America	y2055	-56366.5	-56321.3	-56397.8	-56371.2
USA	North America	y2055	1.47292e+06	1.19097e+06	1.19137e+06	1.19097e+06	1.18959e+06		USA	North America	y2055	-281948	-281555	-281956	-283336
GTM	Latin America	y2055	74022.8	74311.7	74318.9	74306.7	74310.9		GTM	Latin America	y2055	288.917	296.135	283.939	288.17
ECU	Latin America	y2055	63266.4	69311.1	69317.9	69306.5	69310.4		ECU	Latin America	y2055	6044.68	6051.42	6040.04	6043.99
SLV	Latin America	y2055	18898.8	19344.5	19346.4	19343.2	19344.3		SLV	Latin America	y2055	445.763	447.642	444.467	445.568
HND	Latin America	y2055	44147.7	41610.6	41614.6	41607.8	41610.1		HND	Latin America	y2055	-2537.09	-2533.05	-2539.88	-2537.51
BLZ	Latin America	y2055	1814.43	1692.24	1692.4	1692.13	1692.22		BLZ	Latin America	y2055	-122.188	-122.023	-122.301	-122.205
NIC	Latin America	y2055	24123.8	23584	23586.3	23582.5	23583.8		NIC	Latin America	y2055	-539.81	-537.52	-541.39	-540.047
CRI	Latin America	y2055	18416.2	17752.6	17754.3	17751.4	17752.4		CRI	Latin America	y2055	-663.641	-661.917	-664.831	-663.82
CUB	Latin America	y2055	29911.6	26612.6	26615.2	26610.8	26612.3		CUB	Latin America	y2055	-3299.07	-3296.49	-3300.85	-3299.34
PAN	Latin America	y2055	16739.6	17047.9	17049.6	17046.8	17047.7		PAN	Latin America	y2055	308.289	309.945	307.147	308.118
PER	Latin America	y2055	120313	118426	118437	118418	118424		PER	Latin America	y2055	-1887.33	-1875.83	-1895.26	-1888.52
COL	Latin America	y2055	163664	165164	165180	165153	165162		COL	Latin America	y2055	1500.28	1516.33	1489.22	1498.62
BHS	Latin America	y2055	1293.52	1448.16	1448.3	1448.06	1448.15		BHS	Latin America	y2055	154.645	154.786	154.548	154.63
JAM	Latin America	y2055	7955.72	7846.08	7846.85	7845.56	7846.01		JAM	Latin America	y2055	-109.64	-108.878	-110.166	-109.719
CHL	Latin America	y2055	62902.7	59475.8	59481.6	59471.8	59475.2		CHL	Latin America	y2055	-3426.86	-3421.09	-3430.85	-3427.46
HTI	Latin America	y2055	37322.4	40462.7	40466.6	40460	40462.3		HTI	Latin America	y2055	3140.25	3144.18	3137.54	3139.84
BRA	Latin America	y2055	782715	675235	675301	675190	675228		BRA	Latin America	y2055	-107480	-107414	-107525	-107486
ARG	Latin America	y2055	188576	166396	166412	166384	166394		ARG	Latin America	y2055	-22179.9	-22163.7	-22191	-22181.6
VEN	Latin America	y2055	114801	113800	113811	113792	113799		VEN	Latin America	y2055	-1001.02	-989.963	-1008.64	-1002.16
DOM	Latin America	y2055	38367.5	39478.2	39482	39475.5	39477.8		DOM	Latin America	y2055	1110.69	1114.52	1108.04	1110.29
BOL	Latin America	y2055	43505.3	46984.7	46989.3	46981.5	46984.2		BOL	Latin America	y2055	3479.41	3483.98	3476.27	3478.94
PRY	Latin America	y2055	27092.9	27329.2	27331.9	27327.4	27329		PRY	Latin America	y2055	236.372	239.027	234.541	236.097
TTO	Latin America	y2055	3223.27	3335.43	3335.75	3335.2	3335.39		TTO	Latin America	y2055	112.161	112.485	111.938	112.127
FLK	Latin America	y2055	11.4308	9.81079	9.81174	9.81013	9.81069		FLK	Latin America	y2055	-1.61999	-1.61904	-1.62065	-1.62009
GUY	Latin America	y2055	1921.86	1756.26	1756.43	1756.14	1756.24		GUY	Latin America	y2055	-165.596	-165.426	-165.714	-165.614
URY	Latin America	y2055	10640.2	9805.15	9806.1	9804.49	9805.05		URY	Latin America	y2055	-835.068	-834.116	-835.725	-835.167
SUR	Latin America	y2055	1809.23	1742.53	1742.7	1742.42	1742.52		SUR	Latin America	y2055	-66.6995	-66.5303	-66.8162	-66.717
GUF	Latin America	y2055	1465.55	1372.14	1372.28	1372.05	1372.13		GUF	Latin America	y2055	-93.4064	-93.2731	-93.4983	-93.4202
SGS	Latin America	y2055	0.405166	0.352305	0.352339	0.352281	0.352301		SGS	Latin America	y2055	-0.0528609	-0.0528267	-0.0528845	-0.0528644
MAR	Africa	y2055	159394	127693	127615	127617	128862		MAR	Africa	y2055	-31700.9	-31778.4	-31776.7	-30532
TUN	Africa	y2055	47566.6	39014.6	38990.9	38991.4	39371.7		TUN	Africa	y2055	-8552.01	-8575.69	-8575.17	-8194.86
SAU	Africa	y2055	158919	147208	147119	147121	148556		SAU	Africa	y2055	-11710.8	-11800.2	-11798.2	-10363.3
ISR	Africa	y2055	57155.3	45693.8	45666	45666.6	46112.1		ISR	Africa	y2055	-11461.6	-11489.3	-11488.7	-11043.3
JOR	Africa	y2055	56211.8	47197.5	47168.9	47169.5	47629.6		JOR	Africa	y2055	-9014.26	-9042.92	-9042.28	-8582.21
LBN	Africa	y2055	26391.8	23290.9	23276.8	23277.1	23504.1		LBN	Africa	y2055	-3100.94	-3115.08	-3114.77	-2887.73
SYR	Africa	y2055	93536.2	84891.4	84839.9	84841	85668.5		SYR	Africa	y2055	-8644.77	-8696.31	-8695.18	-7867.67
IRQ	Africa	y2055	203892	213549	213420	213422	215504		IRQ	Africa	y2055	9657.76	9528.1	9530.97	11612.6
YEM	Africa	y2055	140294	161283	161185	161187	162760		YEM	Africa	y2055	20989.1	20891.1	20893.3	22465.5
KWT	Africa	y2055	20187.9	17089	17078.6	17078.9	17245.5		KWT	Africa	y2055	-3098.9	-3109.28	-3109.05	-2942.47
QAT	Africa	y2055	16452.1	13441.4	13433.2	13433.4	13564.4		QAT	Africa	y2055	-3010.67	-3018.83	-3018.65	-2887.63
OMN	Africa	y2055	23880.3	21690.2	21677	21677.3	21888.7		OMN	Africa	y2055	-2190.18	-2203.35	-2203.06	-1991.62
ARE	Africa	y2055	42497.5	41965.4	41939.9	41940.5	42349.6		ARE	Africa	y2055	-532.086	-557.565	-557.002	-147.932
PAK	Asia	y2055	986207	1.01468e+06	1.01488e+06	1.01449e+06	1.01503e+06		PAK	Asia	y2055	28472.8	28676.5	28282.7	28822.5
CAN	North America	y2055	161401	139504	139550	139504	139338		CAN	North America	y2055	-21897.5	-21851	-21897.5	-22062.8
PRI	Latin America	y2055	9617.11	8452.1	8452.92	8451.53	8452.01		PRI	Latin America	y2055	-1165.01	-1164.19	-1165.57	-1165.09
AUS	Oceania	y2055	113996	103533	103567	103533	103410		AUS	Oceania	y2055	-10463.5	-10429.1	-10463.5	-10586.2
JPN	Asia	y2055	284996	309643	309743	309643	309283		JPN	Asia	y2055	24646.3	24746.3	24646.3	24286.5
NZL	Oceania	y2055	19979.6	18436	18442.2	18436	18414.2		NZL	Oceania	y2055	-1543.54	-1537.4	-1543.54	-1565.39
IDN	Asia	y2055	959062	935463	935651	935288	935786		IDN	Asia	y2055	-23598.8	-23411	-23774.1	-23276.5
MYS	Asia	y2055	138747	131311	131338	131287	131357		MYS	Asia	y2055	-7435.66	-7409.3	-7460.26	-7390.41
SGP	Asia	y2055	25121.8	21362.6	21366.9	21358.6	21370		SGP	Asia	y2055	-3759.16	-3754.87	-3763.16	-3751.79
BRN	Asia	y2055	1667.04	1654.65	1654.98	1654.34	1655.22		BRN	Asia	y2055	-12.3929	-12.0607	-12.7029	-11.8226
PHL	Asia	y2055	458723	444415	444504	444332	444568		PHL	Asia	y2055	-14307.7	-14218.5	-14391	-14154.6
TLS	Asia	y2055	6751.92	7041.84	7043.25	7040.52	7044.27		TLS	Asia	y2055	289.917	291.331	288.598	292.344
KOR	Asia	y2055	157762	139649	139677	139623	139698		KOR	Asia	y2055	-18112.2	-18084.2	-18138.4	-18064.1
PNG	Asia	y2055	41500.1	39454.7	39462.6	39447.3	39468.3		PNG	Asia	y2055	-2045.39	-2037.47	-2052.78	-2031.79
SLB	Asia	y2055	3547.13	3348.92	3349.59	3348.29	3350.07		SLB	Asia	y2055	-198.213	-197.541	-198.841	-197.059
NCL	Asia	y2055	1000.03	1025.8	1026	1025.61	1026.15		NCL	Asia	y2055	25.7735	25.9795	25.5813	26.1271
VUT	Asia	y2055	1696.92	1426.26	1426.54	1425.99	1426.75		VUT	Asia	y2055	-270.661	-270.374	-270.928	-270.169
FJI	Asia	y2055	2875.17	2671.52	2672.06	2671.02	2672.44		FJI	Asia	y2055	-203.645	-203.109	-204.146	-202.725
REU	Africa	y2055	3264.59	3001.87	3000.95	3000.22	3006.19		REU	Africa	y2055	-262.727	-263.64	-264.372	-258.405
LKA	Asia	y2055	64199.6	66520.9	66534.3	66508.5	66543.9		LKA	Asia	y2055	2321.33	2334.68	2308.86	2344.25
BGD	Asia	y2055	594405	584103	584220	583993	584304		BGD	Asia	y2055	-10302.4	-10185.1	-10411.8	-10101.1
BTN	Asia	y2055	3288.29	2864.68	2865.26	2864.14	2865.67		BTN	Asia	y2055	-423.612	-423.037	-424.149	-422.625
SEN	Africa	y2060	101492	97282.3	97288.2	97266.5	97451.2		SEN	Africa	y2060	-4210.04	-4204.2	-4225.92	-4041.16
GMB	Africa	y2060	15280.6	13500.1	13500.9	13497.9	13523.5		GMB	Africa	y2060	-1780.54	-1779.73	-1782.75	-1757.11
MRT	Africa	y2060	27222.6	24417.2	24418.6	24413.2	24459.5		MRT	Africa	y2060	-2805.47	-2804.01	-2809.46	-2763.08
ESH	Africa	y2060	2775.66	2884.38	2882.54	2882.54	2910.74		ESH	Africa	y2060	108.715	106.879	106.879	135.077
GNB	Africa	y2060	9913.39	9283.28	9283.84	9281.77	9299.4		GNB	Africa	y2060	-630.11	-629.553	-631.625	-613.994
GIN	Africa	y2060	85250.6	70367.5	70371.8	70356	70489.7		GIN	Africa	y2060	-14883	-14878.8	-14894.5	-14760.9
SLE	Africa	y2060	39728.7	38485.5	38487.8	38479.2	38552.3		SLE	Africa	y2060	-1243.14	-1240.83	-1249.42	-1176.33
MLI	Africa	y2060	146823	125276	125284	125256	125494		MLI	Africa	y2060	-21546.7	-21539.2	-21567.2	-21329.3
LBR	Africa	y2060	27418.8	27402.5	27404.1	27398	27450		LBR	Africa	y2060	-16.3722	-14.7287	-20.8461	31.1971
CIV	Africa	y2060	163988	137025	137033	137003	137263		CIV	Africa	y2060	-26962.5	-26954.3	-26984.9	-26724.7
BFA	Africa	y2060	151881	131888	131896	131866	132117		BFA	Africa	y2060	-19993.2	-19985.3	-20014.7	-19764.3
GHA	Africa	y2060	208732	161803	161813	161777	162084		GHA	Africa	y2060	-46928.1	-46918.4	-46954.5	-46647.2
TGO	Africa	y2060	43170.8	41526.8	41529.3	41520	41598.9		TGO	Africa	y2060	-1643.97	-1641.48	-1650.75	-1571.89
NER	Africa	y2060	239932	224417	224431	224380	224807		NER	Africa	y2060	-15514.4	-15500.9	-15551	-15124.8
BEN	Africa	y2060	74350.5	68661.9	68666	68650.7	68781.1		BEN	Africa	y2060	-5688.6	-5684.48	-5699.81	-5569.4
DZA	Africa	y2060	189579	170603	170494	170494	172162		DZA	Africa	y2060	-18975.7	-19084.4	-19084.4	-17416.5
NGA	Africa	y2060	1.44672e+06	1.34518e+06	1.34526e+06	1.34496e+06	1.34752e+06		NGA	Africa	y2060	-101541	-101460	-101760	-99205.5
CMR	Africa	y2060	145389	135294	135302	135272	135528		CMR	Africa	y2060	-10095.3	-10087.1	-10117.3	-9860.39
GAB	Africa	y2060	11062	10758.6	10759.2	10756.8	10777.2		GAB	Africa	y2060	-303.46	-302.814	-305.216	-284.783
GNQ	Africa	y2060	8926.75	7955.02	7955.5	7953.72	7968.83		GNQ	Africa	y2060	-971.729	-971.252	-973.028	-957.92
NAM	Africa	y2060	9361.49	11389.7	11390.4	11387.9	11409.5		NAM	Africa	y2060	2028.22	2028.91	2026.36	2048
AGO	Africa	y2060	188428	208145	208158	208111	208506		AGO	Africa	y2060	19717	19729.5	19683	20078.3
COG	Africa	y2060	26977.8	29937.1	29938.9	29932.2	29989		COG	Africa	y2060	2959.31	2961.11	2954.43	3011.28
COD	Africa	y2060	556123	568022	568056	567929	569008		COD	Africa	y2060	11899.1	11933.1	11806.3	12885.1
LBY	Africa	y2060	29936.1	25979	25962.5	25962.5	26216.5		LBY	Africa	y2060	-3957.08	-3973.63	-3973.63	-3719.65
TCD	Africa	y2060	93871.6	102819	102825	102802	102997		TCD	Africa	y2060	8947.23	8953.4	8930.44	9125.72
CAF	Africa	y2060	20764.6	21658.3	21659.6	21654.8	21695.9		CAF	Africa	y2060	893.724	895.023	890.188	931.321
ZAF	Africa	y2060	246762	222636	222650	222600	223023		ZAF	Africa	y2060	-24125.9	-24112.6	-24162.3	-23739.4
BWA	Africa	y2060	8300.72	9615	9615.58	9613.43	9631.7		BWA	Africa	y2060	1314.29	1314.86	1312.72	1330.98
ZMB	Africa	y2060	107477	125259	125266	125238	125476		ZMB	Africa	y2060	17781.7	17789.2	17761.2	17999.1
SDN	Africa	y2060	220930	226286	226142	226142	228354		SDN	Africa	y2060	5356.37	5212.27	5212.27	7424.52
ZWE	Africa	y2060	62002.5	66267.6	66271.6	66256.8	66382.7		ZWE	Africa	y2060	4265.14	4269.12	4254.33	4380.18
LSO	Africa	y2060	8146.93	7459.73	7460.18	7458.51	7472.68		LSO	Africa	y2060	-687.198	-686.751	-688.416	-674.248
BDI	Africa	y2060	58108	59484.6	59488.1	59474.8	59587.8		BDI	Africa	y2060	1376.55	1380.12	1366.84	1479.81
RWA	Africa	y2060	74590.3	74554.6	74559	74542.4	74684		RWA	Africa	y2060	-35.7906	-31.3192	-47.9628	93.6323
TZA	Africa	y2060	374921	390989	391012	390925	391667		TZA	Africa	y2060	16068	16091.5	16004.2	16746.7
UGA	Africa	y2060	344296	339440	339460	339385	340029		UGA	Africa	y2060	-4856.07	-4835.71	-4911.49	-4266.82
MOZ	Africa	y2060	178769	170274	170284	170246	170569		MOZ	Africa	y2060	-8495.63	-8485.41	-8523.43	-8200.04
SWZ	Africa	y2060	4058.77	4562.69	4562.96	4561.95	4570.61		SWZ	Africa	y2060	503.917	504.19	503.172	511.837
MWI	Africa	y2060	142254	138102	138111	138080	138342		MWI	Africa	y2060	-4151.24	-4142.96	-4173.79	-3911.5
ETH	Africa	y2060	599798	613782	613819	613682	614847		ETH	Africa	y2060	13983.6	14020.4	13883.4	15049.1
EGY	Africa	y2060	595497	455604	455314	455314	459768		EGY	Africa	y2060	-139894	-140184	-140184	-135729
KEN	Africa	y2060	288383	300760	300778	300711	301282		KEN	Africa	y2060	12377.6	12395.6	12328.5	12899.7
ERI	Africa	y2060	13207.1	14247.6	14248.4	14245.2	14272.3		ERI	Africa	y2060	1040.5	1041.36	1038.18	1065.23
SOM	Africa	y2060	92008.6	101130	101136	101114	101306		SOM	Africa	y2060	9121.55	9127.62	9105.04	9297.11
DJI	Africa	y2060	4569.11	4496.2	4496.47	4495.46	4504		DJI	Africa	y2060	-72.9069	-72.6373	-73.641	-65.1018
MDG	Africa	y2060	144001	157281	157291	157256	157554		MDG	Africa	y2060	13280.7	13290.1	13255	13553.7
MUS	Africa	y2060	3605.63	3198.62	3198.81	3198.1	3204.17		MUS	Africa	y2060	-407.014	-406.822	-407.536	-401.461
ATF	Asia	y2060	0.762247	0.702996	0.703127	0.70285	0.703266		ATF	Asia	y2060	-0.0592516	-0.05912	-0.0593973	-0.0589814
CHN	Asia	y2060	4.09909e+06	3.60301e+06	3.60416e+06	3.60302e+06	3.5985e+06		CHN	Asia	y2060	-496085	-494933	-496073	-500595
IND	Asia	y2060	5.034e+06	4.96812e+06	4.96974e+06	4.96815e+06	4.96198e+06		IND	Asia	y2060	-65881.1	-64260.1	-65848	-72017.7
NPL	Asia	y2060	125491	117468	117490	117444	117513		NPL	Asia	y2060	-8023.37	-8001.38	-8047.72	-7978.21
MNG	Asia	y2060	12014.9	12337	12339.3	12334.5	12341.8		MNG	Asia	y2060	322.116	324.425	319.559	326.858
MMR	Asia	y2060	160508	164933	164964	164899	164996		MMR	Asia	y2060	4424.63	4455.51	4390.45	4488.04
LAO	Asia	y2060	27986.5	27958.7	27963.9	27952.9	27969.5		LAO	Asia	y2060	-27.8195	-22.5857	-33.6141	-17.0715
THA	Asia	y2060	189280	184386	184421	184348	184457		THA	Asia	y2060	-4893.7	-4859.18	-4931.91	-4822.82
KHM	Asia	y2060	70102.2	67051	67063.6	67037.1	67076.8		KHM	Asia	y2060	-3051.17	-3038.62	-3065.07	-3025.4
VNM	Asia	y2060	330180	309824	309882	309759	309943		VNM	Asia	y2060	-20356.1	-20298.1	-20420.3	-20237
RUS	Europe	y2060	468936	399512	399558	399454	399078		RUS	Europe	y2060	-69424.1	-69377.5	-69481.5	-69857.5
PRK	Asia	y2060	49046	71334.5	71347.9	71319.8	71362		PRK	Asia	y2060	22288.6	22301.9	22273.8	22316
GRL	Europe	y2060	174.714	150.9	150.883	150.86	150.683		GRL	Europe	y2060	-23.8139	-23.8305	-23.8537	-24.031
ISL	Europe	y2060	1471.85	1297.81	1297.67	1297.47	1295.95		ISL	Europe	y2060	-174.036	-174.179	-174.378	-175.903
ESP	Europe	y2060	155921	143020	143037	143001	142934		ESP	Europe	y2060	-12901.2	-12884	-12920.2	-12987.4
IRL	Europe	y2060	21698.5	17520.2	17522.3	17517.8	17509.6		IRL	Europe	y2060	-4178.35	-4176.25	-4180.69	-4188.92
PRT	Europe	y2060	30713.1	25408.6	25411.7	25405.2	25393.3		PRT	Europe	y2060	-5304.47	-5301.42	-5307.86	-5319.8
GBR	Europe	y2060	268379	230546	230573	230515	230407		GBR	Europe	y2060	-37833.4	-37805.8	-37864.1	-37972.4
FRA	Europe	y2060	283072	231426	231454	231395	231286		FRA	Europe	y2060	-51646.3	-51618.6	-51677.2	-51785.9
BEL	Europe	y2060	49085.6	38586.1	38590.7	38581	38562.8		BEL	Europe	y2060	-10499.5	-10494.8	-10504.6	-10522.7
NLD	Europe	y2060	60619.9	55549.8	55556.5	55542.4	55516.3		NLD	Europe	y2060	-5070.06	-5063.4	-5077.47	-5103.56
NOR	Europe	y2060	23916.3	20260.6	20258.4	20255.3	20231.5		NOR	Europe	y2060	-3655.66	-3657.89	-3661	-3684.81
LUX	Europe	y2060	3220.28	2725.89	2726.22	2725.53	2724.25		LUX	Europe	y2060	-494.387	-494.06	-494.75	-496.03
DEU	Europe	y2060	287203	242451	242480	242419	242305		DEU	Europe	y2060	-44751.3	-44722.2	-44783.6	-44897.5
CHE	Europe	y2060	36497.8	31334.4	31331	31326.1	31289.3		CHE	Europe	y2060	-5163.4	-5166.85	-5171.66	-5208.48
ITA	Europe	y2060	198503	161014	161034	160993	160917		ITA	Europe	y2060	-37488.8	-37469.5	-37510.3	-37585.9
DNK	Europe	y2060	22795.9	19650.9	19653.3	19648.3	19639.1		DNK	Europe	y2060	-3144.96	-3142.6	-3147.57	-3156.81
AUT	Europe	y2060	35753.5	28481.5	28484.9	28477.7	28464.3		AUT	Europe	y2060	-7271.99	-7268.57	-7275.79	-7289.17
SWE	Europe	y2060	40740.9	38180	38184.6	38174.9	38157		SWE	Europe	y2060	-2560.86	-2556.28	-2565.95	-2583.88
CZE	Europe	y2060	33759.6	29645.7	29649.2	29641.7	29627.8		CZE	Europe	y2060	-4113.95	-4110.39	-4117.9	-4131.82
HRV	Europe	y2060	10365.2	9956.02	9957.21	9954.69	9950.01		HRV	Europe	y2060	-409.213	-408.019	-410.54	-415.218
SVN	Europe	y2060	6820.4	6246.33	6247.08	6245.5	6242.56		SVN	Europe	y2060	-574.069	-573.319	-574.901	-577.836
SJM	Europe	y2060	9.10719	7.95644	7.95556	7.95434	7.94499		SJM	Europe	y2060	-1.15075	-1.15163	-1.15285	-1.1622
POL	Europe	y2060	112934	95599.2	95610.6	95586.4	95541.5		POL	Europe	y2060	-17335.1	-17323.6	-17347.8	-17392.7
BIH	Europe	y2060	5876.47	5218.42	5217.85	5217.04	5210.91		BIH	Europe	y2060	-658.045	-658.62	-659.422	-665.553
HUN	Europe	y2060	26549	24564.5	24567.4	24561.2	24549.7		HUN	Europe	y2060	-1984.49	-1981.54	-1987.76	-1999.3
SVK	Europe	y2060	14427.5	14245.6	14247.3	14243.7	14237		SVK	Europe	y2060	-181.885	-180.176	-183.783	-190.476
MNE	Europe	y2060	2111.77	1717.08	1716.89	1716.63	1714.61		MNE	Europe	y2060	-394.693	-394.882	-395.146	-397.163
SRB	Europe	y2060	19506	20081.5	20079.3	20076.2	20052.6		SRB	Europe	y2060	575.55	573.337	570.254	546.657
ALB	Europe	y2060	6329.06	5636.12	5635.5	5634.64	5628.01		ALB	Europe	y2060	-692.937	-693.557	-694.423	-701.045
GRC	Europe	y2060	36246.4	30338.1	30341.7	30334	30319.8		GRC	Europe	y2060	-5908.29	-5904.65	-5912.34	-5926.59
MKD	Europe	y2060	5276.1	4921.71	4921.17	4920.42	4914.63		MKD	Europe	y2060	-354.385	-354.927	-355.683	-361.466
ROU	Europe	y2060	46717	39577.5	39582.3	39572.2	39553.6		ROU	Europe	y2060	-7139.45	-7134.7	-7144.73	-7163.32
LTU	Europe	y2060	7171.34	6172.52	6173.26	6171.7	6168.8		LTU	Europe	y2060	-998.816	-998.076	-999.639	-1002.54
LVA	Europe	y2060	5185.48	4647.82	4648.38	4647.2	4645.02		LVA	Europe	y2060	-537.658	-537.101	-538.278	-540.461
FIN	Europe	y2060	19061	17026.5	17028.5	17024.2	17016.2		FIN	Europe	y2060	-2034.5	-2032.46	-2036.77	-2044.77
EST	Europe	y2060	4345.46	3697.9	3698.35	3697.41	3695.67		EST	Europe	y2060	-647.555	-647.112	-648.048	-649.786
BGR	Europe	y2060	13674.2	13644.7	13646.3	13642.8	13636.4		BGR	Europe	y2060	-29.5693	-27.9326	-31.3878	-37.7981
BLR	Europe	y2060	28414.1	25068.3	25071.2	25064.7	25041.1		BLR	Europe	y2060	-3345.79	-3342.86	-3349.39	-3372.98
TUR	Europe	y2060	383356	289315	289283	289238	288898		TUR	Europe	y2060	-94041.1	-94073	-94117.4	-94457.4
MDA	Europe	y2060	6512.36	6341.03	6341.77	6340.12	6334.16		MDA	Europe	y2060	-171.329	-170.589	-172.239	-178.207
CYP	Europe	y2060	3938.93	4293.47	4293.99	4292.9	4290.88		CYP	Europe	y2060	354.545	355.06	353.973	351.956
IRN	Africa	y2060	318629	295001	294813	294813	297697		IRN	Africa	y2060	-23627.9	-23815.7	-23815.7	-20931.7
UKR	Europe	y2060	125125	108601	108613	108585	108483		UKR	Europe	y2060	-16524.9	-16512.2	-16540.4	-16642.6
GEO	Europe	y2060	7626.41	7185.96	7186.8	7184.93	7178.17		GEO	Europe	y2060	-440.448	-439.609	-441.48	-448.243
ARM	Europe	y2060	7273.57	7094.99	7095.82	7093.97	7087.29		ARM	Europe	y2060	-178.583	-177.754	-179.601	-186.279
AZE	Europe	y2060	31901.1	31167.9	31171.6	31163.4	31134.1		AZE	Europe	y2060	-733.227	-729.586	-737.7	-767.034
KAZ	Europe	y2060	68769.5	60302.8	60309.8	60294.1	60237.3		KAZ	Europe	y2060	-8466.72	-8459.68	-8475.37	-8532.13
TKM	Europe	y2060	25744.6	23286.1	23288.8	23282.8	23260.8		TKM	Europe	y2060	-2458.56	-2455.84	-2461.9	-2483.81
UZB	Europe	y2060	136029	129958	129973	129940	129817		UZB	Europe	y2060	-6070.62	-6055.44	-6089.27	-6211.58
AFG	Asia	y2060	235957	256577	256625	256524	256676		AFG	Asia	y2060	20620.4	20668.5	20567.3	20719.1
TJK	Europe	y2060	39908.7	41908.2	41913	41902.1	41862.7		TJK	Europe	y2060	1999.47	2004.36	1993.45	1954.01
KGZ	Europe	y2060	28469.1	25187.9	25190.9	25184.3	25160.6		KGZ	Europe	y2060	-3281.19	-3278.25	-3284.8	-3308.51
MEX	Latin America	y2060	526558	467130	467182	467105	467086		MEX	Latin America	y2060	-59428	-59376.4	-59453	-59471.8
USA	North America	y2060	1.50822e+06	1.21946e+06	1.21985e+06	1.21946e+06	1.21806e+06		USA	North America	y2060	-288751	-288362	-288751	-290156
GTM	Latin America	y2060	76763.4	76168.8	76177.2	76164.7	76161.7		GTM	Latin America	y2060	-594.559	-586.147	-598.638	-601.697
ECU	Latin America	y2060	64882.6	70431.8	70439.6	70428	70425.2		ECU	Latin America	y2060	5549.25	5557.02	5545.47	5542.65
SLV	Latin America	y2060	18581.4	18861.7	18863.8	18860.7	18860		SLV	Latin America	y2060	280.331	282.414	279.321	278.563
HND	Latin America	y2060	45626.2	42463.4	42468	42461.1	42459.4		HND	Latin America	y2060	-3162.86	-3158.17	-3165.13	-3166.84
BLZ	Latin America	y2060	1873.78	1731.74	1731.93	1731.65	1731.58		BLZ	Latin America	y2060	-142.039	-141.847	-142.131	-142.201
NIC	Latin America	y2060	24307.7	23461.6	23464.2	23460.4	23459.4		NIC	Latin America	y2060	-846.023	-843.432	-847.279	-848.222
CRI	Latin America	y2060	18477.5	17762.5	17764.5	17761.5	17760.8		CRI	Latin America	y2060	-714.972	-713.01	-715.923	-716.636
CUB	Latin America	y2060	28173.1	24941.9	24944.6	24940.5	24939.5		CUB	Latin America	y2060	-3231.25	-3228.5	-3232.59	-3233.59
PAN	Latin America	y2060	17036.4	17295.9	17297.8	17294.9	17294.2		PAN	Latin America	y2060	259.446	261.357	258.52	257.826
PER	Latin America	y2060	121311	118726	118739	118720	118715		PER	Latin America	y2060	-2584.63	-2571.52	-2590.99	-2595.76
COL	Latin America	y2060	162946	163623	163641	163614	163607		COL	Latin America	y2060	676.368	694.439	667.606	661.035
BHS	Latin America	y2060	1316.3	1472.5	1472.66	1472.42	1472.36		BHS	Latin America	y2060	156.198	156.361	156.119	156.06
JAM	Latin America	y2060	7665.44	7495.9	7496.73	7495.5	7495.2		JAM	Latin America	y2060	-169.537	-168.71	-169.939	-170.24
CHL	Latin America	y2060	62506.4	58938.8	58945.3	58935.6	58933.3		CHL	Latin America	y2060	-3567.66	-3561.15	-3570.81	-3573.18
HTI	Latin America	y2060	37790.5	40121.8	40126.3	40119.7	40118.1		HTI	Latin America	y2060	2331.32	2335.75	2329.17	2327.56
BRA	Latin America	y2060	774268	665707	665781	665671	665645		BRA	Latin America	y2060	-108561	-108488	-108597	-108624
ARG	Latin America	y2060	191994	168742	168761	168733	168726		ARG	Latin America	y2060	-23251.8	-23233.1	-23260.8	-23267.6
VEN	Latin America	y2060	116925	115103	115116	115097	115092		VEN	Latin America	y2060	-1822	-1809.29	-1828.17	-1832.79
DOM	Latin America	y2060	38773	39702.1	39706.5	39700	39698.4		DOM	Latin America	y2060	929.099	933.484	926.973	925.378
BOL	Latin America	y2060	44820.8	47772	47777.3	47769.5	47767.6		BOL	Latin America	y2060	2951.22	2956.49	2948.66	2946.74
PRY	Latin America	y2060	27606.5	27640.4	27643.4	27638.9	27637.8		PRY	Latin America	y2060	33.9168	36.9695	32.4367	31.3266
TTO	Latin America	y2060	3052.68	3150.48	3150.83	3150.31	3150.19		TTO	Latin America	y2060	97.8004	98.1484	97.6317	97.5052
FLK	Latin America	y2060	11.2226	9.62404	9.6251	9.62352	9.62313		FLK	Latin America	y2060	-1.59854	-1.59748	-1.59905	-1.59944
GUY	Latin America	y2060	1780.24	1626.49	1626.67	1626.41	1626.34		GUY	Latin America	y2060	-153.743	-153.564	-153.83	-153.896
URY	Latin America	y2060	10411.2	9569.49	9570.55	9568.98	9568.59		URY	Latin America	y2060	-841.702	-840.645	-842.214	-842.599
SUR	Latin America	y2060	1777.54	1700.17	1700.36	1700.08	1700.01		SUR	Latin America	y2060	-77.3715	-77.1837	-77.4625	-77.5308
GUF	Latin America	y2060	1533.25	1442.38	1442.54	1442.3	1442.24		GUF	Latin America	y2060	-90.8762	-90.7169	-90.9534	-91.0114
SGS	Latin America	y2060	0.408854	0.35556	0.3556	0.355541	0.355527		SGS	Latin America	y2060	-0.0532937	-0.0532544	-0.0533127	-0.053327
MAR	Africa	y2060	159596	126969	126888	126888	128130		MAR	Africa	y2060	-32626.6	-32707.4	-32707.4	-31466.2
TUN	Africa	y2060	47411.8	38704.7	38680	38680	39058.4		TUN	Africa	y2060	-8707.18	-8731.83	-8731.83	-8353.44
SAU	Africa	y2060	162190	150469	150374	150374	151845		SAU	Africa	y2060	-11720.2	-11816.1	-11816.1	-10345
ISR	Africa	y2060	60919.7	48583.4	48552.5	48552.5	49027.5		ISR	Africa	y2060	-12336.3	-12367.2	-12367.2	-11892.2
JOR	Africa	y2060	59291.3	49460.8	49429.3	49429.3	49912.8		JOR	Africa	y2060	-9830.49	-9861.98	-9861.98	-9378.44
LBN	Africa	y2060	27052.9	23795.5	23780.3	23780.3	24013		LBN	Africa	y2060	-3257.4	-3272.55	-3272.55	-3039.92
SYR	Africa	y2060	94954.3	85439.8	85385.4	85385.4	86220.7		SYR	Africa	y2060	-9514.47	-9568.88	-9568.88	-8733.59
IRQ	Africa	y2060	214631	223957	223814	223814	226004		IRQ	Africa	y2060	9325.81	9183.2	9183.2	11372.7
YEM	Africa	y2060	151261	169683	169575	169575	171234		YEM	Africa	y2060	18421.8	18313.8	18313.8	19972.7
KWT	Africa	y2060	20413.5	17308.2	17297.2	17297.2	17466.4		KWT	Africa	y2060	-3105.3	-3116.32	-3116.32	-2947.11
QAT	Africa	y2060	17012.9	13885.7	13876.9	13876.9	14012.7		QAT	Africa	y2060	-3127.13	-3135.97	-3135.97	-3000.22
OMN	Africa	y2060	24333.2	22030.7	22016.6	22016.6	22232		OMN	Africa	y2060	-2302.56	-2316.59	-2316.59	-2101.21
ARE	Africa	y2060	43233.7	42824.4	42797.1	42797.1	43215.8		ARE	Africa	y2060	-409.301	-436.571	-436.571	-17.9041
PAK	Asia	y2060	1.03103e+06	1.04687e+06	1.04706e+06	1.04665e+06	1.04727e+06		PAK	Asia	y2060	15834	16030	15617	16236.4
CAN	North America	y2060	165566	142946	142993	142947	142776		CAN	North America	y2060	-22620.4	-22573.3	-22619.5	-22789.8
PRI	Latin America	y2060	9253.13	8136.15	8137.05	8135.71	8135.39		PRI	Latin America	y2060	-1116.98	-1116.08	-1117.41	-1117.74
AUS	Oceania	y2060	118210	107150	107185	107150	107023		AUS	Oceania	y2060	-11060.6	-11025.3	-11059.9	-11187.6
JPN	Asia	y2060	276281	299715	299813	299718	299368		JPN	Asia	y2060	23434.1	23531.9	23437.1	23086.8
NZL	Oceania	y2060	20410.4	18777.8	18784	18778	18755.6		NZL	Oceania	y2060	-1632.61	-1626.43	-1632.49	-1654.87
IDN	Asia	y2060	958310	930219	930393	930026	930577		IDN	Asia	y2060	-28090.8	-27916.7	-28283.6	-27733.2
MYS	Asia	y2060	142521	134756	134781	134728	134808		MYS	Asia	y2060	-7765.46	-7740.23	-7793.38	-7713.65
SGP	Asia	y2060	25563	21846.3	21850.4	21841.8	21854.7		SGP	Asia	y2060	-3716.75	-3712.66	-3721.28	-3708.35
BRN	Asia	y2060	1688.79	1677.12	1677.43	1676.77	1677.77		BRN	Asia	y2060	-11.6661	-11.3522	-12.0137	-11.0214
PHL	Asia	y2060	472428	453799	453884	453705	453973		PHL	Asia	y2060	-18629.4	-18544.5	-18723.5	-18455
TLS	Asia	y2060	7246.95	7388.42	7389.8	7386.89	7391.26		TLS	Asia	y2060	141.469	142.852	139.938	144.31
KOR	Asia	y2060	151895	134586	134612	134559	134638		KOR	Asia	y2060	-17308.5	-17283.4	-17336.4	-17256.8
PNG	Asia	y2060	43273	40402.7	40410.3	40394.3	40418.2		PNG	Asia	y2060	-2870.23	-2862.67	-2878.61	-2854.7
SLB	Asia	y2060	3722.86	3459.73	3460.37	3459.01	3461.06		SLB	Asia	y2060	-263.131	-262.483	-263.848	-261.801
NCL	Asia	y2060	1021.43	1050.1	1050.3	1049.88	1050.51		NCL	Asia	y2060	28.668	28.8645	28.4503	29.0717
VUT	Asia	y2060	1771.82	1466.16	1466.43	1465.85	1466.72		VUT	Asia	y2060	-305.661	-305.387	-305.965	-305.097
FJI	Asia	y2060	2827.68	2603.06	2603.55	2602.52	2604.06		FJI	Asia	y2060	-224.618	-224.131	-225.158	-223.617
REU	Africa	y2060	3281.09	3029.78	3029.96	3029.28	3035.04		REU	Africa	y2060	-251.31	-251.128	-251.805	-246.051
LKA	Asia	y2060	63792.5	65452.7	65465	65439.2	65477.9		LKA	Asia	y2060	1660.18	1672.43	1646.61	1685.34
BGD	Asia	y2060	598161	581616	581725	581496	581840		BGD	Asia	y2060	-16545.2	-16436.3	-16665.8	-16321.6
BTN	Asia	y2060	3333.02	2886.81	2887.35	2886.21	2887.92		BTN	Asia	y2060	-446.207	-445.667	-446.806	-445.098
SEN	Africa	y2070	112939	104969	104967	104939	105150		SEN	Africa	y2070	-7969.31	-7971.06	-7999.69	-7788.41
GMB	Africa	y2070	16688.3	14325.4	14325.1	14321.2	14350		GMB	Africa	y2070	-2362.93	-2363.17	-2367.07	-2338.24
MRT	Africa	y2070	29396.6	25772.9	25772.5	25765.5	25817.4		MRT	Africa	y2070	-3623.61	-3624.04	-3631.07	-3579.2
ESH	Africa	y2070	3022.46	3129.25	3126.96	3127.05	3157.71		ESH	Africa	y2070	106.787	104.494	104.588	135.245
GNB	Africa	y2070	10494.5	9460.32	9460.16	9457.58	9476.62		GNB	Africa	y2070	-1034.16	-1034.32	-1036.9	-1017.86
GIN	Africa	y2070	91883.3	73967.6	73966.4	73946.2	74095.1		GIN	Africa	y2070	-17915.7	-17916.9	-17937.1	-17788.2
SLE	Africa	y2070	42777.2	39771.7	39771	39760.2	39840.2		SLE	Africa	y2070	-3005.5	-3006.17	-3017.01	-2936.96
MLI	Africa	y2070	164407	135324	135322	135285	135558		MLI	Africa	y2070	-29082.1	-29084.4	-29121.3	-28848.9
LBR	Africa	y2070	30373.8	29010.4	29009.9	29002	29060.4		LBR	Africa	y2070	-1363.46	-1363.94	-1371.85	-1313.46
CIV	Africa	y2070	176720	144893	144891	144851	145143		CIV	Africa	y2070	-31827.1	-31829.5	-31869	-31577.4
BFA	Africa	y2070	172620	144557	144555	144516	144807		BFA	Africa	y2070	-28063	-28065.4	-28104.9	-27813.9
GHA	Africa	y2070	229044	172957	172954	172907	173255		GHA	Africa	y2070	-56087.3	-56090.1	-56137.3	-55789.2
TGO	Africa	y2070	47001.9	43375.5	43374.8	43362.9	43450.2		TGO	Africa	y2070	-3626.43	-3627.15	-3638.99	-3551.68
NER	Africa	y2070	300773	265992	265987	265915	266450		NER	Africa	y2070	-34781.5	-34785.9	-34858.4	-34323.1
BEN	Africa	y2070	82254.6	73546.4	73545.2	73525.1	73673.2		BEN	Africa	y2070	-8708.18	-8709.4	-8729.47	-8581.43
DZA	Africa	y2070	191009	169611	169487	169492	171154		DZA	Africa	y2070	-21397.5	-21521.8	-21516.7	-19855
NGA	Africa	y2070	1.68461e+06	1.51165e+06	1.51162e+06	1.51121e+06	1.51425e+06		NGA	Africa	y2070	-172967	-172993	-173405	-170362
CMR	Africa	y2070	156096	141372	141370	141331	141616		CMR	Africa	y2070	-14723.7	-14726.1	-14764.6	-14480.1
GAB	Africa	y2070	11645	11209.8	11209.6	11206.6	11229.2		GAB	Africa	y2070	-435.123	-435.31	-438.368	-415.805
GNQ	Africa	y2070	9631.22	8465.16	8465.02	8462.71	8479.75		GNQ	Africa	y2070	-1166.06	-1166.2	-1168.51	-1151.47
NAM	Africa	y2070	9763.29	11666.7	11666.5	11663.4	11686.8		NAM	Africa	y2070	1903.45	1903.26	1900.07	1923.56
AGO	Africa	y2070	213568	226032	226028	225966	226421		AGO	Africa	y2070	12463.2	12459.4	12397.8	12852.7
COG	Africa	y2070	29471.6	31847.3	31846.8	31838.1	31902.2		COG	Africa	y2070	2375.7	2375.17	2366.48	2430.58
COD	Africa	y2070	636777	618138	618127	617959	619203		COD	Africa	y2070	-18639.4	-18649.7	-18818.3	-17574.2
LBY	Africa	y2070	29962.1	25925.7	25906.7	25907.5	26161.5		LBY	Africa	y2070	-4036.32	-4055.32	-4054.54	-3800.55
TCD	Africa	y2070	107268	111940	111938	111908	112133		TCD	Africa	y2070	4672.43	4670.57	4640.03	4865.34
CAF	Africa	y2070	22204.6	21997	21996.6	21990.6	22034.9		CAF	Africa	y2070	-207.641	-208.007	-214.008	-169.733
ZAF	Africa	y2070	249884	223067	223063	223002	223451		ZAF	Africa	y2070	-26817.4	-26821.1	-26881.9	-26433
BWA	Africa	y2070	8312.49	9563.74	9563.58	9560.97	9580.22		BWA	Africa	y2070	1251.25	1251.09	1248.49	1267.73
ZMB	Africa	y2070	125156	138838	138836	138798	139078		ZMB	Africa	y2070	13681.8	13679.5	13641.7	13921.1
SDN	Africa	y2070	239800	237693	237519	237526	239855		SDN	Africa	y2070	-2107.16	-2281.33	-2274.18	54.4618
ZWE	Africa	y2070	66170.8	67362.9	67361.8	67343.4	67479		ZWE	Africa	y2070	1192.1	1190.97	1172.6	1308.18
LSO	Africa	y2070	8236.81	7288.11	7287.99	7286	7300.67		LSO	Africa	y2070	-948.698	-948.82	-950.808	-936.139
BDI	Africa	y2070	62928.8	61049.6	61048.6	61031.9	61154.8		BDI	Africa	y2070	-1879.27	-1880.28	-1896.94	-1774.06
RWA	Africa	y2070	83268.5	80185.1	80183.8	80161.9	80323.3		RWA	Africa	y2070	-3083.39	-3084.73	-3106.6	-2945.21
TZA	Africa	y2070	429964	431168	431161	431043	431911		TZA	Africa	y2070	1203.66	1196.49	1078.87	1946.7
UGA	Africa	y2070	410590	386072	386065	385960	386737		UGA	Africa	y2070	-24518	-24524.4	-24629.7	-23852.6
MOZ	Africa	y2070	196805	179783	179780	179731	180093		MOZ	Africa	y2070	-17021.6	-17024.6	-17073.7	-16711.8
SWZ	Africa	y2070	4144.89	4556.18	4556.1	4554.86	4564.03		SWZ	Africa	y2070	411.281	411.206	409.963	419.133
MWI	Africa	y2070	169842	156055	156052	156010	156324		MWI	Africa	y2070	-13787.6	-13790.2	-13832.8	-13518.7
ETH	Africa	y2070	650754	639348	639337	639163	640450		ETH	Africa	y2070	-11405.5	-11416.1	-11590.5	-10303.7
EGY	Africa	y2070	622713	472675	472329	472343	476974		EGY	Africa	y2070	-150038	-150384	-150370	-145739
KEN	Africa	y2070	320184	322809	322804	322716	323366		KEN	Africa	y2070	2625.63	2620.26	2532.2	3181.94
ERI	Africa	y2070	14294.3	14886.6	14886.3	14882.3	14912.2		ERI	Africa	y2070	592.261	592.013	587.952	617.915
SOM	Africa	y2070	99667.7	109917	109915	109885	110106		SOM	Africa	y2070	10249.2	10247.3	10217.4	10438.6
DJI	Africa	y2070	4861.29	4690.21	4690.13	4688.85	4698.29		DJI	Africa	y2070	-171.078	-171.156	-172.435	-162.995
MDG	Africa	y2070	162763	169708	169705	169659	170001		MDG	Africa	y2070	6945.64	6942.82	6896.52	7238.11
MUS	Africa	y2070	3360.31	2966.46	2966.41	2965.6	2971.57		MUS	Africa	y2070	-393.85	-393.9	-394.709	-388.738
ATF	Asia	y2070	0.770953	0.709377	0.709625	0.7094	0.709587		ATF	Asia	y2070	-0.0615766	-0.0613278	-0.0615529	-0.0613657
CHN	Asia	y2070	3.74337e+06	3.27599e+06	3.27711e+06	3.276e+06	3.27197e+06		CHN	Asia	y2070	-467390	-466266	-467379	-471404
IND	Asia	y2070	5.07226e+06	4.91694e+06	4.91853e+06	4.91694e+06	4.91088e+06		IND	Asia	y2070	-155319	-153731	-155319	-161376
NPL	Asia	y2070	130267	118291	118332	118295	118326		NPL	Asia	y2070	-11975.9	-11934.4	-11972	-11940.8
MNG	Asia	y2070	12111.3	12249.4	12253.7	12249.8	12253		MNG	Asia	y2070	138.08	142.377	138.489	141.722
MMR	Asia	y2070	155620	156562	156617	156568	156609		MMR	Asia	y2070	942.364	997.286	947.595	988.917
LAO	Asia	y2070	28350.7	27625.7	27635.4	27626.6	27633.9		LAO	Asia	y2070	-725.001	-715.31	-724.078	-716.787
THA	Asia	y2070	179114	172826	172886	172831	172877		THA	Asia	y2070	-6288.96	-6228.34	-6283.19	-6237.57
KHM	Asia	y2070	72466.4	67445.3	67469	67447.6	67465.4		KHM	Asia	y2070	-5021.11	-4997.45	-5018.85	-5001.05
VNM	Asia	y2070	319573	295441	295545	295451	295529		VNM	Asia	y2070	-24131.5	-24027.9	-24121.6	-24043.7
RUS	Europe	y2070	465919	394263	394317	394203	393837		RUS	Europe	y2070	-71656.3	-71602.4	-71715.4	-72082.3
PRK	Asia	y2070	45311.3	67005.2	67028.7	67007.5	67025.1		PRK	Asia	y2070	21693.9	21717.4	21696.2	21713.8
GRL	Europe	y2070	167.016	144.11	144.098	144.076	143.908		GRL	Europe	y2070	-22.9058	-22.9178	-22.9399	-23.1082
ISL	Europe	y2070	1513.61	1332.2	1332.08	1331.88	1330.32		ISL	Europe	y2070	-181.415	-181.527	-181.731	-183.287
ESP	Europe	y2070	154650	141287	141308	141272	141189		ESP	Europe	y2070	-13363.1	-13342.4	-13378.2	-13461.5
IRL	Europe	y2070	21932.9	17728.2	17730.8	17726.3	17715.8		IRL	Europe	y2070	-4204.78	-4202.18	-4206.67	-4217.12
PRT	Europe	y2070	29168	24021.6	24025.1	24019	24004.8		PRT	Europe	y2070	-5146.43	-5142.9	-5148.99	-5163.15
GBR	Europe	y2070	276907	236812	236847	236787	236647		GBR	Europe	y2070	-40095.5	-40060.8	-40120.7	-40260.4
FRA	Europe	y2070	293166	238950	238985	238924	238783		FRA	Europe	y2070	-54216.4	-54181.4	-54241.9	-54382.7
BEL	Europe	y2070	50400.6	39537	39542.8	39532.8	39509.4		BEL	Europe	y2070	-10863.6	-10857.8	-10867.8	-10891.1
NLD	Europe	y2070	61372.7	56355	56363.2	56349	56315.7		NLD	Europe	y2070	-5017.77	-5009.51	-5023.78	-5057.01
NOR	Europe	y2070	25035.4	21190.6	21188.9	21185.6	21160.9		NOR	Europe	y2070	-3844.73	-3846.5	-3849.75	-3874.5
LUX	Europe	y2070	3452.39	2930.06	2930.49	2929.75	2928.02		LUX	Europe	y2070	-522.33	-521.9	-522.642	-524.37
DEU	Europe	y2070	289094	243360	243395	243334	243190		DEU	Europe	y2070	-45734.8	-45699.1	-45760.7	-45904.2
CHE	Europe	y2070	38087.3	32600.2	32597.5	32592.5	32554.4		CHE	Europe	y2070	-5487.06	-5489.78	-5494.79	-5532.86
ITA	Europe	y2070	192532	155551	155574	155534	155443		ITA	Europe	y2070	-36981	-36958.2	-36997.6	-37089.3
DNK	Europe	y2070	23593.3	20343.2	20346.2	20341.1	20329.1		DNK	Europe	y2070	-3250.07	-3247.09	-3252.24	-3264.24
AUT	Europe	y2070	36464.8	28950.2	28954.4	28947.1	28930		AUT	Europe	y2070	-7514.61	-7510.37	-7517.7	-7534.77
SWE	Europe	y2070	42997.2	40152	40157.9	40147.7	40124		SWE	Europe	y2070	-2845.18	-2839.3	-2849.46	-2873.14
CZE	Europe	y2070	32781.8	28621.7	28625.9	28618.7	28601.8		CZE	Europe	y2070	-4160.11	-4155.92	-4163.16	-4180.04
HRV	Europe	y2070	9978.08	9547.57	9548.97	9546.55	9540.92		HRV	Europe	y2070	-430.513	-429.113	-431.531	-437.16
SVN	Europe	y2070	6844.82	6235.59	6236.5	6234.92	6231.25		SVN	Europe	y2070	-609.235	-608.321	-609.9	-613.576
SJM	Europe	y2070	9.11965	7.94801	7.94734	7.94612	7.93684		SJM	Europe	y2070	-1.17164	-1.17231	-1.17353	-1.18281
POL	Europe	y2070	106660	89636.6	89649.8	89627.1	89574.2		POL	Europe	y2070	-17023.7	-17010.5	-17033.2	-17086.1
BIH	Europe	y2070	4667.89	4114.91	4114.57	4113.94	4109.13		BIH	Europe	y2070	-552.974	-553.317	-553.949	-558.754
HUN	Europe	y2070	25489.1	23468.9	23472.4	23466.4	23452.6		HUN	Europe	y2070	-2020.18	-2016.74	-2022.68	-2036.52
SVK	Europe	y2070	13726.8	13438	13440	13436.5	13428.6		SVK	Europe	y2070	-288.786	-286.816	-290.218	-298.142
MNE	Europe	y2070	2054.05	1661.73	1661.59	1661.34	1659.4		MNE	Europe	y2070	-392.322	-392.461	-392.716	-394.656
SRB	Europe	y2070	18092.1	18612.6	18611.1	18608.2	18586.5		SRB	Europe	y2070	520.507	518.954	516.097	494.361
ALB	Europe	y2070	5386.97	4764.44	4764.05	4763.31	4757.75		ALB	Europe	y2070	-622.53	-622.927	-623.658	-629.222
GRC	Europe	y2070	35853.7	29863.7	29868	29860.5	29842.9		GRC	Europe	y2070	-5990.07	-5985.7	-5993.26	-6010.87
MKD	Europe	y2070	4850.65	4488.69	4488.31	4487.62	4482.38		MKD	Europe	y2070	-361.967	-362.341	-363.03	-368.272
ROU	Europe	y2070	41091.7	34614.6	34619.7	34611	34590.5		ROU	Europe	y2070	-6477.08	-6472.01	-6480.77	-6501.18
LTU	Europe	y2070	6746.61	5748.82	5749.66	5748.2	5744.81		LTU	Europe	y2070	-997.794	-996.951	-998.407	-1001.8
LVA	Europe	y2070	5098.61	4539.99	4540.66	4539.51	4536.83		LVA	Europe	y2070	-558.622	-557.957	-559.106	-561.783
FIN	Europe	y2070	19428.3	17290.7	17293.2	17288.8	17278.6		FIN	Europe	y2070	-2137.59	-2135.06	-2139.44	-2149.63
EST	Europe	y2070	4329.78	3668.95	3669.49	3668.56	3666.4		EST	Europe	y2070	-660.833	-660.295	-661.224	-663.387
BGR	Europe	y2070	12132.2	12047	12048.8	12045.7	12038.6		BGR	Europe	y2070	-85.2386	-83.4728	-86.5228	-93.6262
BLR	Europe	y2070	27870.3	24403.3	24406.6	24399.6	24376.9		BLR	Europe	y2070	-3466.96	-3463.63	-3470.63	-3493.33
TUR	Europe	y2070	379541	285264	285240	285196	284863		TUR	Europe	y2070	-94277.7	-94301.5	-94345.3	-94678.4
MDA	Europe	y2070	6112.53	5875.61	5876.41	5874.73	5869.26		MDA	Europe	y2070	-236.917	-236.114	-237.799	-243.266
CYP	Europe	y2070	4025.81	4361.85	4362.49	4361.39	4358.81		CYP	Europe	y2070	336.04	336.68	335.575	333.003
IRN	Africa	y2070	312051	286990	286779	286788	289599		IRN	Africa	y2070	-25061.5	-25271.8	-25263.2	-22451.6
UKR	Europe	y2070	121674	104394	104409	104379	104282		UKR	Europe	y2070	-17279.4	-17265.1	-17295	-17392.2
GEO	Europe	y2070	6784.35	6323.9	6324.77	6322.96	6317.07		GEO	Europe	y2070	-460.448	-459.583	-461.397	-467.281
ARM	Europe	y2070	6748.21	6530.24	6531.13	6529.26	6523.18		ARM	Europe	y2070	-217.969	-217.076	-218.949	-225.025
AZE	Europe	y2070	30989	29959	29963.1	29954.5	29926.6		AZE	Europe	y2070	-1029.98	-1025.88	-1034.48	-1062.35
KAZ	Europe	y2070	66873.9	58448.3	58456.3	58439.5	58385.1		KAZ	Europe	y2070	-8425.58	-8417.59	-8434.36	-8488.74
TKM	Europe	y2070	25871.5	23275.8	23279	23272.3	23250.6		TKM	Europe	y2070	-2595.69	-2592.5	-2599.18	-2620.84
UZB	Europe	y2070	137626	129453	129471	129434	129313		UZB	Europe	y2070	-8172.52	-8154.82	-8191.95	-8312.41
AFG	Asia	y2070	275474	283377	283477	283387	283462		AFG	Asia	y2070	7902.95	8002.36	7912.42	7987.22
TJK	Europe	y2070	41507.9	42529.1	42534.9	42522.7	42483.2		TJK	Europe	y2070	1021.19	1027	1014.8	975.23
KGZ	Europe	y2070	28933.5	25079.5	25082.9	25075.7	25052.4		KGZ	Europe	y2070	-3854.03	-3850.6	-3857.79	-3881.13
MEX	Latin America	y2070	525597	461355	461425	461341	461287		MEX	Latin America	y2070	-64241.6	-64172.2	-64255.5	-64309.5
USA	North America	y2070	1.58232e+06	1.28002e+06	1.28043e+06	1.28002e+06	1.27853e+06		USA	North America	y2070	-302303	-301885	-302294	-303786
GTM	Latin America	y2070	80729.3	78353.4	78365.2	78351.1	78341.9		GTM	Latin America	y2070	-2375.86	-2364.07	-2378.21	-2387.38
ECU	Latin America	y2070	67206.7	71707.6	71718.4	71705.5	71697.1		ECU	Latin America	y2070	4500.87	4511.66	4498.72	4490.33
SLV	Latin America	y2070	17660.4	17600	17602.7	17599.5	17597.4		SLV	Latin America	y2070	-60.4201	-57.7726	-60.9496	-63.0088
HND	Latin America	y2070	47698.7	43357.9	43364.4	43356.6	43351.5		HND	Latin America	y2070	-4340.85	-4334.33	-4342.15	-4347.22
BLZ	Latin America	y2070	1963.91	1782.64	1782.9	1782.58	1782.37		BLZ	Latin America	y2070	-181.274	-181.005	-181.327	-181.536
NIC	Latin America	y2070	24082.6	22739.7	22743.1	22739	22736.3		NIC	Latin America	y2070	-1342.96	-1339.54	-1343.64	-1346.3
CRI	Latin America	y2070	18422.9	17554.2	17556.9	17553.7	17551.7		CRI	Latin America	y2070	-868.704	-866.063	-869.232	-871.286
CUB	Latin America	y2070	24669.3	21613.8	21617.1	21613.2	21610.6		CUB	Latin America	y2070	-3055.47	-3052.22	-3056.12	-3058.65
PAN	Latin America	y2070	17407.9	17571.9	17574.6	17571.4	17569.3		PAN	Latin America	y2070	164.054	166.698	163.526	161.47
PER	Latin America	y2070	121227	117480	117498	117477	117463		PER	Latin America	y2070	-3746.71	-3729.03	-3750.24	-3763.99
COL	Latin America	y2070	159348	158365	158389	158361	158342		COL	Latin America	y2070	-982.982	-959.16	-987.747	-1006.28
BHS	Latin America	y2070	1359.3	1510.76	1510.99	1510.72	1510.54		BHS	Latin America	y2070	151.465	151.692	151.419	151.243
JAM	Latin America	y2070	6964.44	6698.71	6699.72	6698.51	6697.72		JAM	Latin America	y2070	-265.727	-264.719	-265.928	-266.712
CHL	Latin America	y2070	61189.9	57370.4	57379.1	57368.7	57362		CHL	Latin America	y2070	-3819.46	-3810.83	-3821.19	-3827.9
HTI	Latin America	y2070	37696.1	38623.9	38629.7	38622.7	38618.2		HTI	Latin America	y2070	927.819	933.629	926.657	922.138
BRA	Latin America	y2070	748535	639433	639529	639413	639339		BRA	Latin America	y2070	-109102	-109006	-109122	-109196
ARG	Latin America	y2070	196333	171433	171459	171428	171408		ARG	Latin America	y2070	-24899.6	-24873.8	-24904.8	-24924.8
VEN	Latin America	y2070	119313	116154	116172	116151	116137		VEN	Latin America	y2070	-3158.24	-3140.76	-3161.73	-3175.32
DOM	Latin America	y2070	38940.1	39540.2	39546.2	39539	39534.4		DOM	Latin America	y2070	600.132	606.08	598.943	594.316
BOL	Latin America	y2070	46560.8	48533.5	48540.8	48532.1	48526.4		BOL	Latin America	y2070	1972.74	1980.04	1971.28	1965.6
PRY	Latin America	y2070	28084.3	27770.9	27775.1	27770.1	27766.8		PRY	Latin America	y2070	-313.378	-309.201	-314.214	-317.463
TTO	Latin America	y2070	2704.17	2786.9	2787.32	2786.82	2786.49		TTO	Latin America	y2070	82.7302	83.1495	82.6464	82.3203
FLK	Latin America	y2070	10.8277	9.26763	9.26902	9.26735	9.26626		FLK	Latin America	y2070	-1.56004	-1.55864	-1.56032	-1.5614
GUY	Latin America	y2070	1512.71	1371.23	1371.43	1371.18	1371.02		GUY	Latin America	y2070	-141.485	-141.279	-141.526	-141.686
URY	Latin America	y2070	9872.38	9038.48	9039.84	9038.21	9037.15		URY	Latin America	y2070	-833.898	-832.538	-834.17	-835.227
SUR	Latin America	y2070	1695.4	1602.19	1602.43	1602.14	1601.95		SUR	Latin America	y2070	-93.2127	-92.9717	-93.261	-93.4484
GUF	Latin America	y2070	1663.02	1571.98	1572.22	1571.93	1571.75		GUF	Latin America	y2070	-91.0435	-90.807	-91.0908	-91.2747
SGS	Latin America	y2070	0.409813	0.355987	0.356041	0.355976	0.355935		SGS	Latin America	y2070	-0.0538256	-0.053772	-0.0538363	-0.0538779
MAR	Africa	y2070	156980	123357	123266	123270	124478		MAR	Africa	y2070	-33623.3	-33713.6	-33709.9	-32501.4
TUN	Africa	y2070	46272.6	37489.2	37461.8	37462.9	37830.2		TUN	Africa	y2070	-8783.35	-8810.82	-8809.69	-8442.42
SAU	Africa	y2070	166519	154738	154624	154629	156145		SAU	Africa	y2070	-11781.6	-11895	-11890.4	-10374.4
ISR	Africa	y2070	68430.9	54379.3	54339.5	54341.1	54873.9		ISR	Africa	y2070	-14051.6	-14091.4	-14089.8	-13557
JOR	Africa	y2070	64653	53329.2	53290.1	53291.7	53814.2		JOR	Africa	y2070	-11323.8	-11362.9	-11361.3	-10838.8
LBN	Africa	y2070	28000.8	24472.9	24455	24455.7	24695.5		LBN	Africa	y2070	-3527.88	-3545.81	-3545.07	-3305.32
SYR	Africa	y2070	96113	85316.4	85253.9	85256.4	86092.3		SYR	Africa	y2070	-10796.6	-10859.1	-10856.5	-10020.7
IRQ	Africa	y2070	233026	241833	241656	241663	244032		IRQ	Africa	y2070	8806.41	8629.21	8636.49	11005.7
YEM	Africa	y2070	169671	183285	183150	183156	184951		YEM	Africa	y2070	13613.3	13479	13484.5	15280.1
KWT	Africa	y2070	20588.5	17579.8	17566.9	17567.5	17739.7		KWT	Africa	y2070	-3008.7	-3021.58	-3021.05	-2848.82
QAT	Africa	y2070	17638.2	14458.3	14447.7	14448.2	14589.8		QAT	Africa	y2070	-3179.84	-3190.43	-3189.99	-3048.35
OMN	Africa	y2070	24378	22094.1	22077.9	22078.6	22295		OMN	Africa	y2070	-2283.92	-2300.11	-2299.44	-2082.99
ARE	Africa	y2070	43854	43724.6	43692.5	43693.8	44122.2		ARE	Africa	y2070	-129.469	-161.508	-160.192	268.17
PAK	Asia	y2070	1.11158e+06	1.09355e+06	1.09394e+06	1.09359e+06	1.09388e+06		PAK	Asia	y2070	-18024.8	-17641.2	-17988.2	-17699.6
CAN	North America	y2070	174896	150479	150528	150480	150301		CAN	North America	y2070	-24417.5	-24368.4	-24416.5	-24594.9
PRI	Latin America	y2070	8522.77	7483.74	7484.86	7483.51	7482.64		PRI	Latin America	y2070	-1039.03	-1037.91	-1039.26	-1040.13
AUS	Oceania	y2070	126398	114233	114271	114234	114099		AUS	Oceania	y2070	-12164.8	-12127.5	-12164	-12299.4
JPN	Asia	y2070	257418	278476	278568	278477	278155		JPN	Asia	y2070	21057.8	21149.6	21058.8	20736.1
NZL	Oceania	y2070	21263.7	19485.7	19492.1	19485.9	19462.8		NZL	Oceania	y2070	-1778	-1771.65	-1777.87	-1800.97
IDN	Asia	y2070	945453	908645	908963	908675	908915		IDN	Asia	y2070	-36808.5	-36489.7	-36778.1	-36538.3
MYS	Asia	y2070	148025	139262	139311	139267	139304		MYS	Asia	y2070	-8763.28	-8714.43	-8758.63	-8721.87
SGP	Asia	y2070	26665.9	22810.2	22818.2	22810.9	22817		SGP	Asia	y2070	-3855.72	-3847.72	-3854.96	-3848.94
BRN	Asia	y2070	1712.34	1696.43	1697.02	1696.48	1696.93		BRN	Asia	y2070	-15.9124	-15.3173	-15.8557	-15.408
PHL	Asia	y2070	494329	465622	465786	465638	465761		PHL	Asia	y2070	-28706.9	-28543.5	-28691.3	-28568.4
TLS	Asia	y2070	8106.85	7892.63	7895.4	7892.9	7894.98		TLS	Asia	y2070	-214.213	-211.444	-213.949	-211.866
KOR	Asia	y2070	140587	124192	124236	124196	124229		KOR	Asia	y2070	-16394.8	-16351.2	-16390.6	-16357.9
PNG	Asia	y2070	45857.7	41583.7	41598.3	41585.1	41596.1		PNG	Asia	y2070	-4274.02	-4259.43	-4272.63	-4261.65
SLB	Asia	y2070	4002.28	3615.72	3616.99	3615.84	3616.8		SLB	Asia	y2070	-386.556	-385.288	-386.436	-385.481
NCL	Asia	y2070	1057.82	1087.75	1088.13	1087.79	1088.07		NCL	Asia	y2070	29.9266	30.3082	29.963	30.2501
VUT	Asia	y2070	1882.06	1520.45	1520.98	1520.5	1520.9		VUT	Asia	y2070	-361.607	-361.073	-361.556	-361.155
FJI	Asia	y2070	2682.63	2433.86	2434.71	2433.94	2434.58		FJI	Asia	y2070	-248.769	-247.915	-248.687	-248.045
REU	Africa	y2070	3308.96	3067.62	3067.56	3066.73	3072.9		REU	Africa	y2070	-241.342	-241.393	-242.229	-236.055
LKA	Asia	y2070	61995.7	62827.2	62849.2	62829.3	62845.9		LKA	Asia	y2070	831.53	853.57	833.629	850.212
BGD	Asia	y2070	595870	565714	565912	565733	565882		BGD	Asia	y2070	-30155.7	-29957.2	-30136.8	-29987.5
BTN	Asia	y2070	3361.87	2877.71	2878.72	2877.81	2878.57		BTN	Asia	y2070	-484.159	-483.15	-484.063	-483.303
SEN	Africa	y2080	122005	110407	110407	110376	110600		SEN	Africa	y2080	-11597.4	-11597.4	-11628.7	-11404.3
GMB	Africa	y2080	17645.9	14791.1	14791.1	14786.9	14816.9		GMB	Africa	y2080	-2854.82	-2854.82	-2859	-2828.95
MRT	Africa	y2080	30848.6	26561.2	26561.2	26553.7	26607.7		MRT	Africa	y2080	-4287.35	-4287.35	-4294.86	-4240.89
ESH	Africa	y2080	3229.7	3339.58	3335.55	3335.7	3370.19		ESH	Africa	y2080	109.882	105.855	106	140.489
GNB	Africa	y2080	10720.9	9375.28	9375.28	9372.63	9391.68		GNB	Africa	y2080	-1345.66	-1345.66	-1348.31	-1329.26
GIN	Africa	y2080	95529.2	75543.5	75543.5	75522.2	75675.7		GIN	Africa	y2080	-19985.6	-19985.6	-20007	-19853.5
SLE	Africa	y2080	44541.8	39978.3	39978.3	39967	40048.2		SLE	Africa	y2080	-4563.52	-4563.52	-4574.82	-4493.59
MLI	Africa	y2080	177307	141636	141636	141596	141884		MLI	Africa	y2080	-35671.2	-35671.2	-35711.3	-35423.5
LBR	Africa	y2080	32448.4	29858.3	29858.3	29849.9	29910.6		LBR	Africa	y2080	-2590.02	-2590.02	-2598.46	-2537.8
CIV	Africa	y2080	185257	149530	149530	149488	149792		CIV	Africa	y2080	-35726.8	-35726.8	-35769.1	-35465.3
BFA	Africa	y2080	189297	153712	153712	153668	153981		BFA	Africa	y2080	-35585.2	-35585.2	-35628.7	-35316.4
GHA	Africa	y2080	244663	180924	180924	180873	181241		GHA	Africa	y2080	-63738.4	-63738.4	-63789.5	-63421.9
TGO	Africa	y2080	49686.1	44188.9	44188.9	44176.4	44266.2		TGO	Africa	y2080	-5497.24	-5497.24	-5509.73	-5419.95
NER	Africa	y2080	357715	302798	302798	302712	303327		NER	Africa	y2080	-54917.5	-54917.5	-55003.1	-54387.9
BEN	Africa	y2080	88290.8	76594.6	76594.6	76572.9	76728.5		BEN	Africa	y2080	-11696.2	-11696.2	-11717.9	-11562.2
DZA	Africa	y2080	188613	166238	166037	166044	167761		DZA	Africa	y2080	-22375.4	-22575.8	-22568.6	-20851.8
NGA	Africa	y2080	1.89135e+06	1.6505e+06	1.6505e+06	1.65003e+06	1.65338e+06		NGA	Africa	y2080	-240853	-240853	-241320	-237967
CMR	Africa	y2080	162267	143936	143936	143895	144188		CMR	Africa	y2080	-18331.1	-18331.1	-18371.8	-18079.4
GAB	Africa	y2080	12007.7	11446.5	11446.5	11443.3	11466.6		GAB	Africa	y2080	-561.119	-561.119	-564.354	-541.098
GNQ	Africa	y2080	10126.8	8828.91	8828.91	8826.41	8844.35		GNQ	Africa	y2080	-1297.85	-1297.85	-1300.34	-1282.4
NAM	Africa	y2080	9911.05	11666	11666	11662.7	11686.4		NAM	Africa	y2080	1754.92	1754.92	1751.62	1775.33
AGO	Africa	y2080	233484	238041	238041	237973	238457		AGO	Africa	y2080	4556.82	4556.82	4489.54	4973.17
COG	Africa	y2080	31167.7	32992.8	32992.8	32983.5	33050.5		COG	Africa	y2080	1825.09	1825.09	1815.76	1882.79
COD	Africa	y2080	698392	651994	651994	651810	653135		COD	Africa	y2080	-46397.5	-46397.5	-46581.8	-45257.2
LBY	Africa	y2080	29553.2	25596.7	25565.9	25567	25831.3		LBY	Africa	y2080	-3956.51	-3987.38	-3986.27	-3721.92
TCD	Africa	y2080	117947	118321	118321	118287	118528		TCD	Africa	y2080	373.343	373.343	339.901	580.294
CAF	Africa	y2080	22764.7	21666.4	21666.4	21660.3	21704.3		CAF	Africa	y2080	-1098.27	-1098.27	-1104.39	-1060.37
ZAF	Africa	y2080	249105	220314	220314	220251	220699		ZAF	Africa	y2080	-28791.4	-28791.4	-28853.6	-28406
BWA	Africa	y2080	8191.41	9341.4	9341.4	9338.76	9357.74		BWA	Africa	y2080	1149.99	1149.99	1147.35	1166.33
ZMB	Africa	y2080	139582	148956	148956	148913	149216		ZMB	Africa	y2080	9373.6	9373.6	9331.5	9634.13
SDN	Africa	y2080	250734	242645	242352	242363	244869		SDN	Africa	y2080	-8089.12	-8381.69	-8371.15	-5865.27
ZWE	Africa	y2080	68314.6	66727.7	66727.7	66708.8	66844.4		ZWE	Africa	y2080	-1586.87	-1586.87	-1605.73	-1470.16
LSO	Africa	y2080	8100.69	6962.69	6962.69	6960.72	6974.86		LSO	Africa	y2080	-1138.01	-1138.01	-1139.98	-1125.83
BDI	Africa	y2080	65227.3	60859.3	60859.3	60842.1	60965.8		BDI	Africa	y2080	-4368.01	-4368.01	-4385.21	-4261.56
RWA	Africa	y2080	89785.4	83728.1	83728.1	83704.4	83874.5		RWA	Africa	y2080	-6057.4	-6057.4	-6081.06	-5910.95
TZA	Africa	y2080	475296	461593	461593	461462	462400		TZA	Africa	y2080	-13703.6	-13703.6	-13834	-12896.2
UGA	Africa	y2080	468901	424235	424235	424115	424977		UGA	Africa	y2080	-44665.9	-44665.9	-44785.8	-43923.8
MOZ	Africa	y2080	209479	184491	184491	184439	184813		MOZ	Africa	y2080	-24988.6	-24988.6	-25040.7	-24665.9
SWZ	Africa	y2080	4122.63	4444.06	4444.06	4442.8	4451.83		SWZ	Africa	y2080	321.429	321.429	320.173	329.202
MWI	Africa	y2080	193568	170250	170250	170202	170548		MWI	Africa	y2080	-23317.3	-23317.3	-23365.4	-23019.5
ETH	Africa	y2080	677159	642091	642091	641910	643214		ETH	Africa	y2080	-35067.7	-35067.7	-35249.1	-33944.6
EGY	Africa	y2080	637829	481087	480507	480528	485496		EGY	Africa	y2080	-156742	-157322	-157301	-152332
KEN	Africa	y2080	344747	337011	337011	336916	337601		KEN	Africa	y2080	-7735.28	-7735.28	-7830.53	-7145.82
ERI	Africa	y2080	15151.8	15133.4	15133.4	15129.1	15159.9		ERI	Africa	y2080	-18.4403	-18.4403	-22.7177	8.02902
SOM	Africa	y2080	104974	115546	115546	115513	115748		SOM	Africa	y2080	10571.8	10571.8	10539.1	10773.9
DJI	Africa	y2080	5053.72	4797.86	4797.86	4796.5	4806.25		DJI	Africa	y2080	-255.86	-255.86	-257.217	-247.469
MDG	Africa	y2080	177749	178535	178535	178485	178848		MDG	Africa	y2080	786.823	786.823	736.361	1099.09
MUS	Africa	y2080	3116.44	2730.15	2730.15	2729.38	2734.93		MUS	Africa	y2080	-386.287	-386.287	-387.059	-381.512
ATF	Asia	y2080	0.759995	0.700509	0.700764	0.700542	0.700774		ATF	Asia	y2080	-0.0594853	-0.0592302	-0.0594525	-0.0592209
CHN	Asia	y2080	3.40156e+06	2.96446e+06	2.9654e+06	2.96446e+06	2.96078e+06		CHN	Asia	y2080	-437108	-436170	-437108	-440789
IND	Asia	y2080	5.00828e+06	4.78874e+06	4.79028e+06	4.78874e+06	4.78279e+06		IND	Asia	y2080	-219548	-218001	-219548	-225494
NPL	Asia	y2080	131897	116438	116481	116444	116482		NPL	Asia	y2080	-15458.6	-15416.2	-15453.2	-15414.7
MNG	Asia	y2080	11973.6	12049.8	12054.2	12050.4	12054.4		MNG	Asia	y2080	76.242	80.6294	76.8055	80.7904
MMR	Asia	y2080	148097	146116	146169	146123	146171		MMR	Asia	y2080	-1981.4	-1928.2	-1974.57	-1926.25
LAO	Asia	y2080	27905.5	26696.7	26706.4	26698	26706.8		LAO	Asia	y2080	-1208.82	-1199.1	-1207.57	-1198.74
THA	Asia	y2080	170127	162777	162836	162784	162838		THA	Asia	y2080	-7350.77	-7291.5	-7343.15	-7289.32
KHM	Asia	y2080	72724.8	66349.1	66373.3	66352.2	66374.2		KHM	Asia	y2080	-6375.67	-6351.51	-6372.56	-6350.62
VNM	Asia	y2080	303217	277323	277424	277336	277428		VNM	Asia	y2080	-25893.8	-25792.8	-25880.8	-25789.1
RUS	Europe	y2080	464362	392877	392930	392815	392455		RUS	Europe	y2080	-71485.2	-71431.5	-71546.8	-71906.9
PRK	Asia	y2080	41463.3	62452.5	62475.2	62455.4	62476.1		PRK	Asia	y2080	20989.2	21011.9	20992.1	21012.8
GRL	Europe	y2080	157.572	136.32	136.314	136.289	136.134		GRL	Europe	y2080	-21.2517	-21.2576	-21.2831	-21.4376
ISL	Europe	y2080	1545.17	1359.55	1359.49	1359.24	1357.69		ISL	Europe	y2080	-185.624	-185.682	-185.936	-187.478
ESP	Europe	y2080	155243	141314	141340	141303	141207		ESP	Europe	y2080	-13928.9	-13902.6	-13939.3	-14035.8
IRL	Europe	y2080	22243.6	18006.4	18009.7	18005	17992.7		IRL	Europe	y2080	-4237.22	-4233.87	-4238.54	-4250.84
PRT	Europe	y2080	28181.8	23068.7	23073	23067	23051.3		PRT	Europe	y2080	-5113.14	-5108.84	-5114.83	-5130.59
GBR	Europe	y2080	285763	243951	243997	243933	243767		GBR	Europe	y2080	-41811.9	-41766.4	-41829.8	-41996.4
FRA	Europe	y2080	304125	247295	247341	247277	247108		FRA	Europe	y2080	-56829.5	-56783.3	-56847.6	-57016.5
BEL	Europe	y2080	51901.5	40655.8	40663.4	40652.9	40625.1		BEL	Europe	y2080	-11245.6	-11238	-11248.6	-11276.4
NLD	Europe	y2080	62693.2	57461.8	57472.5	57457.6	57418.3		NLD	Europe	y2080	-5231.43	-5220.71	-5235.64	-5274.87
NOR	Europe	y2080	26269.2	22186.7	22185.7	22181.5	22156.4		NOR	Europe	y2080	-4082.52	-4083.49	-4087.63	-4112.79
LUX	Europe	y2080	3702.02	3137.82	3138.41	3137.59	3135.45		LUX	Europe	y2080	-564.199	-563.614	-564.429	-566.571
DEU	Europe	y2080	293946	246793	246839	246775	246607		DEU	Europe	y2080	-47152.7	-47106.7	-47170.8	-47339.4
CHE	Europe	y2080	39866.4	34044.9	34043.5	34037.1	33998.5		CHE	Europe	y2080	-5821.49	-5822.97	-5829.33	-5867.94
ITA	Europe	y2080	190007	152865	152894	152854	152750		ITA	Europe	y2080	-37141.8	-37113.3	-37153	-37257.4
DNK	Europe	y2080	24580.8	21089.3	21093.2	21087.7	21073.3		DNK	Europe	y2080	-3491.54	-3487.6	-3493.08	-3507.48
AUT	Europe	y2080	37391.4	29622.2	29627.8	29620.1	29599.8		AUT	Europe	y2080	-7769.12	-7763.59	-7771.29	-7791.52
SWE	Europe	y2080	45360	42310.2	42318.1	42307.1	42278.2		SWE	Europe	y2080	-3049.81	-3041.92	-3052.91	-3081.81
CZE	Europe	y2080	31941.3	27877.9	27883.1	27875.9	27856.9		CZE	Europe	y2080	-4063.33	-4058.13	-4065.38	-4084.41
HRV	Europe	y2080	9669.55	9226.3	9228.02	9225.63	9219.33		HRV	Europe	y2080	-443.246	-441.525	-443.922	-450.222
SVN	Europe	y2080	6887.1	6279.4	6280.57	6278.94	6274.65		SVN	Europe	y2080	-607.698	-606.527	-608.159	-612.446
SJM	Europe	y2080	9.12796	7.96627	7.96593	7.96444	7.95541		SJM	Europe	y2080	-1.16169	-1.16204	-1.16352	-1.17256
POL	Europe	y2080	100062	83743.8	83759.4	83737.7	83680.5		POL	Europe	y2080	-16318.3	-16302.7	-16324.4	-16381.6
BIH	Europe	y2080	3624.18	3181.73	3181.59	3180.99	3177.39		BIH	Europe	y2080	-442.45	-442.588	-443.182	-446.791
HUN	Europe	y2080	24644.3	22567.8	22572	22566.1	22550.7		HUN	Europe	y2080	-2076.53	-2072.32	-2078.18	-2093.59
SVK	Europe	y2080	12989.2	12693.6	12695.9	12692.6	12684		SVK	Europe	y2080	-295.69	-293.322	-296.62	-305.288
MNE	Europe	y2080	1993.37	1605.39	1605.32	1605.02	1603.2		MNE	Europe	y2080	-387.984	-388.053	-388.353	-390.174
SRB	Europe	y2080	16799.7	17190.9	17190.2	17187	17167.5		SRB	Europe	y2080	391.254	390.509	387.298	367.803
ALB	Europe	y2080	4502.35	3952.41	3952.24	3951.5	3947.02		ALB	Europe	y2080	-549.943	-550.114	-550.853	-555.335
GRC	Europe	y2080	35784.3	29687.8	29693.4	29685.7	29665.4		GRC	Europe	y2080	-6096.49	-6090.96	-6098.67	-6118.94
MKD	Europe	y2080	4436.07	4083.78	4083.6	4082.84	4078.21		MKD	Europe	y2080	-352.291	-352.468	-353.231	-357.862
ROU	Europe	y2080	36212.6	30316.9	30322.6	30314.7	30294		ROU	Europe	y2080	-5895.69	-5890.04	-5897.91	-5918.61
LTU	Europe	y2080	6348.34	5411.17	5412.18	5410.78	5407.08		LTU	Europe	y2080	-937.168	-936.159	-937.564	-941.259
LVA	Europe	y2080	5051.62	4492.81	4493.65	4492.48	4489.41		LVA	Europe	y2080	-558.808	-557.97	-559.137	-562.205
FIN	Europe	y2080	19814.8	17585.5	17588.8	17584.2	17572.2		FIN	Europe	y2080	-2229.31	-2226.03	-2230.6	-2242.6
EST	Europe	y2080	4327.55	3667.81	3668.49	3667.54	3665.04		EST	Europe	y2080	-659.736	-659.052	-660.005	-662.51
BGR	Europe	y2080	10856.5	10738.9	10740.9	10738.1	10730.8		BGR	Europe	y2080	-117.633	-115.63	-118.42	-125.753
BLR	Europe	y2080	27403.1	23969.2	23972.5	23965.5	23943.5		BLR	Europe	y2080	-3433.91	-3430.63	-3437.66	-3459.63
TUR	Europe	y2080	371091	277910	277898	277846	277531		TUR	Europe	y2080	-93181.8	-93193.8	-93245.7	-93560.9
MDA	Europe	y2080	5707.98	5429.97	5430.72	5429.12	5424.15		MDA	Europe	y2080	-278.009	-277.267	-278.86	-283.837
CYP	Europe	y2080	4066.67	4385.04	4385.86	4384.72	4381.72		CYP	Europe	y2080	318.375	319.193	318.054	315.059
IRN	Africa	y2080	298668	274444	274113	274125	276959		IRN	Africa	y2080	-24223.6	-24554.6	-24542.6	-21708.4
UKR	Europe	y2080	118660	101306	101320	101290	101197		UKR	Europe	y2080	-17353.5	-17339.7	-17369.4	-17462.3
GEO	Europe	y2080	6095.89	5645.52	5646.29	5644.63	5639.46		GEO	Europe	y2080	-450.377	-449.606	-451.262	-456.437
ARM	Europe	y2080	6268.01	6005.38	6006.2	6004.44	5998.93		ARM	Europe	y2080	-262.639	-261.818	-263.579	-269.084
AZE	Europe	y2080	29581.1	28503.6	28507.5	28499.2	28473		AZE	Europe	y2080	-1077.51	-1073.61	-1081.97	-1108.1
KAZ	Europe	y2080	64617	56372.3	56380	56363.5	56311.8		KAZ	Europe	y2080	-8244.71	-8237.01	-8253.54	-8305.21
TKM	Europe	y2080	25553.8	22952.4	22955.6	22948.8	22927.8		TKM	Europe	y2080	-2601.35	-2598.21	-2604.94	-2625.98
UZB	Europe	y2080	136049	126727	126745	126708	126591		UZB	Europe	y2080	-9321.68	-9304.37	-9341.54	-9457.7
AFG	Asia	y2080	306846	301723	301833	301737	301837		AFG	Asia	y2080	-5123.11	-5013.26	-5109	-5009.22
TJK	Europe	y2080	41984.2	42158.3	42164.1	42151.7	42113.1		TJK	Europe	y2080	174.106	179.867	167.501	128.858
KGZ	Europe	y2080	28688.3	24504.8	24508.1	24500.9	24478.5		KGZ	Europe	y2080	-4183.5	-4180.16	-4187.34	-4209.8
MEX	Latin America	y2080	513935	447654	447727	447648	447576		MEX	Latin America	y2080	-66281.2	-66207.9	-66287.2	-66358.9
USA	North America	y2080	1.65754e+06	1.33903e+06	1.33946e+06	1.33902e+06	1.33747e+06		USA	North America	y2080	-318508	-318075	-318517	-320068
GTM	Latin America	y2080	82380.7	78514.6	78527.5	78513.6	78501		GTM	Latin America	y2080	-3866.11	-3853.26	-3867.16	-3879.75
ECU	Latin America	y2080	68119.4	71749.9	71761.6	71748.9	71737.4		ECU	Latin America	y2080	3630.47	3642.21	3629.51	3618.01
SLV	Latin America	y2080	16316.9	16019	16021.7	16018.8	16016.3		SLV	Latin America	y2080	-297.898	-295.277	-298.112	-300.68
HND	Latin America	y2080	48400.7	43203.7	43210.7	43203.1	43196.2		HND	Latin America	y2080	-5197.06	-5189.99	-5197.64	-5204.56
BLZ	Latin America	y2080	2008.86	1800.1	1800.4	1800.08	1799.79		BLZ	Latin America	y2080	-208.754	-208.46	-208.778	-209.067
NIC	Latin America	y2080	23118.5	21475.7	21479.2	21475.4	21472		NIC	Latin America	y2080	-1642.75	-1639.24	-1643.04	-1646.48
CRI	Latin America	y2080	18095.7	17124.6	17127.4	17124.4	17121.6		CRI	Latin America	y2080	-971.065	-968.263	-971.294	-974.039
CUB	Latin America	y2080	21583.7	18734.6	18737.7	18734.4	18731.4		CUB	Latin America	y2080	-2849.1	-2846.03	-2849.35	-2852.35
PAN	Latin America	y2080	17520.2	17594.5	17597.4	17594.3	17591.4		PAN	Latin America	y2080	74.2573	77.1367	74.0222	71.2016
PER	Latin America	y2080	118817	114211	114230	114209	114191		PER	Latin America	y2080	-4606.17	-4587.47	-4607.69	-4626
COL	Latin America	y2080	153101	150928	150953	150926	150902		COL	Latin America	y2080	-2172.73	-2148.03	-2174.74	-2198.94
BHS	Latin America	y2080	1389.25	1537.41	1537.66	1537.39	1537.15		BHS	Latin America	y2080	148.165	148.417	148.145	147.898
JAM	Latin America	y2080	6141.94	5829.52	5830.47	5829.44	5828.51		JAM	Latin America	y2080	-312.423	-311.469	-312.501	-313.436
CHL	Latin America	y2080	59269.3	55330.2	55339.3	55329.5	55320.6		CHL	Latin America	y2080	-3939.05	-3929.99	-3939.78	-3948.65
HTI	Latin America	y2080	36484.3	36321.2	36327.1	36320.7	36314.9		HTI	Latin America	y2080	-163.126	-157.182	-163.612	-169.434
BRA	Latin America	y2080	714577	606521	606620	606513	606416		BRA	Latin America	y2080	-108056	-107956	-108064	-108161
ARG	Latin America	y2080	197683	171826	171854	171823	171796		ARG	Latin America	y2080	-25856.9	-25828.7	-25859.2	-25886.7
VEN	Latin America	y2080	119507	115362	115381	115360	115342		VEN	Latin America	y2080	-4145.18	-4126.31	-4146.73	-4165.22
DOM	Latin America	y2080	38292.7	38609.3	38615.6	38608.8	38602.6		DOM	Latin America	y2080	316.585	322.903	316.069	309.879
BOL	Latin America	y2080	47118	48294.9	48302.8	48294.3	48286.5		BOL	Latin America	y2080	1176.93	1184.83	1176.29	1168.54
PRY	Latin America	y2080	27859	27295.1	27299.6	27294.8	27290.4		PRY	Latin America	y2080	-563.819	-559.352	-564.183	-568.559
TTO	Latin America	y2080	2375.09	2445.21	2445.61	2445.18	2444.79		TTO	Latin America	y2080	70.123	70.5232	70.0904	69.6984
FLK	Latin America	y2080	10.4917	8.99747	8.99894	8.99735	8.99591		FLK	Latin America	y2080	-1.49419	-1.49272	-1.49431	-1.49575
GUY	Latin America	y2080	1258.71	1128.18	1128.36	1128.16	1127.98		GUY	Latin America	y2080	-130.536	-130.351	-130.551	-130.732
URY	Latin America	y2080	9263.3	8448.2	8449.58	8448.09	8446.73		URY	Latin America	y2080	-815.101	-813.719	-815.214	-816.569
SUR	Latin America	y2080	1592.53	1490	1490.24	1489.98	1489.74		SUR	Latin America	y2080	-102.527	-102.283	-102.547	-102.786
GUF	Latin America	y2080	1775.37	1684.43	1684.7	1684.41	1684.14		GUF	Latin America	y2080	-90.9416	-90.6659	-90.9641	-91.2341
SGS	Latin America	y2080	0.416834	0.362294	0.362354	0.362289	0.362231		SGS	Latin America	y2080	-0.0545397	-0.0544804	-0.0545446	-0.0546026
MAR	Africa	y2080	151034	117682	117540	117545	118760		MAR	Africa	y2080	-33352.4	-33494.3	-33489.2	-32273.9
TUN	Africa	y2080	44467.9	35934.3	35891	35892.5	36263.6		TUN	Africa	y2080	-8533.61	-8576.93	-8575.37	-8204.27
SAU	Africa	y2080	169750	157950	157760	157767	159398		SAU	Africa	y2080	-11800.1	-11990.6	-11983.7	-10352.5
ISR	Africa	y2080	75878	60183.9	60111.4	60114	60735.5		ISR	Africa	y2080	-15694	-15766.6	-15764	-15142.4
JOR	Africa	y2080	68878	56278.4	56210.5	56213	56794.2		JOR	Africa	y2080	-12599.6	-12667.5	-12665	-12083.8
LBN	Africa	y2080	28293.7	24627.5	24597.8	24598.9	24853.2		LBN	Africa	y2080	-3666.18	-3695.87	-3694.8	-3440.46
SYR	Africa	y2080	94662.8	83097.6	82997.4	83001	83859.2		SYR	Africa	y2080	-11565.3	-11665.4	-11661.8	-10803.7
IRQ	Africa	y2080	248924	255344	255036	255047	257684		IRQ	Africa	y2080	6420.21	6112.33	6123.42	8760.44
YEM	Africa	y2080	183699	192777	192544	192553	194544		YEM	Africa	y2080	9077.37	8844.93	8853.3	10844.2
KWT	Africa	y2080	20955.5	17965.6	17943.9	17944.7	18130.2		KWT	Africa	y2080	-2989.9	-3011.57	-3010.79	-2825.25
QAT	Africa	y2080	17785.1	14723.7	14705.9	14706.6	14858.6		QAT	Africa	y2080	-3061.42	-3079.17	-3078.53	-2926.48
OMN	Africa	y2080	23884.9	21775.7	21749.4	21750.4	21975.3		OMN	Africa	y2080	-2109.23	-2135.48	-2134.54	-1909.65
ARE	Africa	y2080	43904.4	44217.1	44163.8	44165.7	44622.3		ARE	Africa	y2080	312.686	259.371	261.291	717.936
PAK	Asia	y2080	1.16111e+06	1.11745e+06	1.11786e+06	1.1175e+06	1.11787e+06		PAK	Asia	y2080	-43654.3	-43247.4	-43602	-43232.5
CAN	North America	y2080	184376	158312	158363	158310	158124		CAN	North America	y2080	-26063.9	-26012.8	-26065.5	-26251.5
PRI	Latin America	y2080	7797.7	6838.89	6840.01	6838.8	6837.7		PRI	Latin America	y2080	-958.81	-957.691	-958.902	-959.998
AUS	Oceania	y2080	134164	121081	121121	121080	120938		AUS	Oceania	y2080	-13082.7	-13043.6	-13084	-13226.3
JPN	Asia	y2080	239723	258635	258717	258633	258335		JPN	Asia	y2080	18912.4	18994.2	18910.7	18611.9
NZL	Oceania	y2080	22116.6	20212.5	20219.1	20212.3	20188.6		NZL	Oceania	y2080	-1904.09	-1897.57	-1904.29	-1928.05
IDN	Asia	y2080	920493	876042	876361	876083	876373		IDN	Asia	y2080	-44450.3	-44131.3	-44409.3	-44119.6
MYS	Asia	y2080	150397	140915	140967	140922	140969		MYS	Asia	y2080	-9481.42	-9430.11	-9474.83	-9428.22
SGP	Asia	y2080	27866.2	23784.1	23792.7	23785.2	23793		SGP	Asia	y2080	-4082.1	-4073.44	-4080.99	-4073.13
BRN	Asia	y2080	1716.73	1699.01	1699.63	1699.09	1699.65		BRN	Asia	y2080	-17.7266	-17.108	-17.6472	-17.0853
PHL	Asia	y2080	505575	468188	468359	468210	468365		PHL	Asia	y2080	-37386.5	-37216	-37364.6	-37209.7
TLS	Asia	y2080	8589.72	8115.17	8118.12	8115.55	8118.23		TLS	Asia	y2080	-474.554	-471.599	-474.175	-471.491
KOR	Asia	y2080	129784	114235	114277	114241	114278		KOR	Asia	y2080	-15548.4	-15506.8	-15543.1	-15505.3
PNG	Asia	y2080	47191.6	41834.2	41849.4	41836.1	41850		PNG	Asia	y2080	-5357.41	-5342.17	-5355.45	-5341.62
SLB	Asia	y2080	4175.92	3684.27	3685.61	3684.44	3685.66		SLB	Asia	y2080	-491.65	-490.309	-491.478	-490.26
NCL	Asia	y2080	1088.1	1119.28	1119.69	1119.33	1119.7		NCL	Asia	y2080	31.1822	31.5897	31.2345	31.6047
VUT	Asia	y2080	1941.54	1539.83	1540.39	1539.91	1540.41		VUT	Asia	y2080	-401.702	-401.141	-401.63	-401.121
FJI	Asia	y2080	2495.05	2236.97	2237.78	2237.07	2237.81		FJI	Asia	y2080	-258.086	-257.271	-257.981	-257.241
REU	Africa	y2080	3333.5	3100.37	3100.37	3099.5	3105.8		REU	Africa	y2080	-233.123	-233.123	-234	-227.701
LKA	Asia	y2080	59476.5	59652.6	59674.3	59655.4	59675.1		LKA	Asia	y2080	176.106	197.826	178.896	198.623
BGD	Asia	y2080	580189	539736	539932	539761	539939		BGD	Asia	y2080	-40453.3	-40256.8	-40428	-40249.5
BTN	Asia	y2080	3308	2814.19	2815.22	2814.33	2815.26		BTN	Asia	y2080	-493.805	-492.78	-493.673	-492.742
SEN	Africa	y2090	127816	113354	113355	113323	113548		SEN	Africa	y2090	-14462.2	-14461.4	-14493.1	-14267.8
GMB	Africa	y2090	18088.1	14884.7	14884.8	14880.6	14910.2		GMB	Africa	y2090	-3203.37	-3203.28	-3207.43	-3177.84
MRT	Africa	y2090	31550.5	26794.3	26794.5	26787	26840.3		MRT	Africa	y2090	-4756.22	-4756.04	-4763.52	-4710.26
ESH	Africa	y2090	3405.45	3526.46	3521.53	3521.76	3556.53		ESH	Africa	y2090	121.012	116.075	116.31	151.079
GNB	Africa	y2090	10568	9032.72	9032.78	9030.26	9048.21		GNB	Africa	y2090	-1535.32	-1535.26	-1537.78	-1519.82
GIN	Africa	y2090	96532.8	75278.5	75279	75258	75407.7		GIN	Africa	y2090	-21254.3	-21253.8	-21274.8	-21125.2
SLE	Africa	y2090	44968.1	39278.6	39278.9	39267.9	39346		SLE	Africa	y2090	-5689.52	-5689.26	-5700.22	-5622.14
MLI	Africa	y2090	184658	144109	144110	144070	144356		MLI	Africa	y2090	-40549.5	-40548.6	-40588.8	-40302.3
LBR	Africa	y2090	33494.8	29941.2	29941.4	29933	29992.6		LBR	Africa	y2090	-3553.57	-3553.37	-3561.73	-3502.21
CIV	Africa	y2090	189514	151118	151119	151077	151377		CIV	Africa	y2090	-38395.4	-38394.4	-38436.6	-38136.2
BFA	Africa	y2090	200394	159236	159237	159192	159509		BFA	Africa	y2090	-41158.9	-41157.9	-41202.3	-40885.8
GHA	Africa	y2090	254611	185283	185284	185233	185601		GHA	Africa	y2090	-69327.9	-69326.7	-69378.5	-69010.1
TGO	Africa	y2090	50927.1	44040.8	44041.1	44028.8	44116.4		TGO	Africa	y2090	-6886.28	-6885.99	-6898.29	-6810.74
NER	Africa	y2090	408155	332929	332931	332838	333500		NER	Africa	y2090	-75226.2	-75224	-75317	-74655.1
BEN	Africa	y2090	91889.5	77779	77779.5	77757.8	77912.4		BEN	Africa	y2090	-14110.6	-14110.1	-14131.8	-13977.2
DZA	Africa	y2090	184897	161729	161503	161513	163108		DZA	Africa	y2090	-23168.2	-23394.6	-23383.9	-21789.3
NGA	Africa	y2090	2.05729e+06	1.75842e+06	1.75843e+06	1.75794e+06	1.76144e+06		NGA	Africa	y2090	-298864	-298852	-299343	-295847
CMR	Africa	y2090	164131	143074	143075	143035	143319		CMR	Africa	y2090	-21057.7	-21056.7	-21096.7	-20812.2
GAB	Africa	y2090	12138.4	11486.3	11486.4	11483.2	11506		GAB	Africa	y2090	-652.07	-651.994	-655.201	-632.367
GNQ	Africa	y2090	10434.6	9035	9035.06	9032.54	9050.5		GNQ	Africa	y2090	-1399.57	-1399.51	-1402.03	-1384.07
NAM	Africa	y2090	9838.86	11437.6	11437.6	11434.4	11457.2		NAM	Africa	y2090	1598.7	1598.78	1595.58	1618.32
AGO	Africa	y2090	245350	243617	243618	243550	244035		AGO	Africa	y2090	-1733.6	-1731.98	-1800.01	-1315.72
COG	Africa	y2090	31997.7	33286.6	33286.9	33277.6	33343.7		COG	Africa	y2090	1288.93	1289.15	1279.86	1346.03
COD	Africa	y2090	737139	668162	668166	667980	669308		COD	Africa	y2090	-68977	-68972.6	-69159.2	-67830.9
LBY	Africa	y2090	29116	25124.1	25088.9	25090.6	25338.3		LBY	Africa	y2090	-3991.89	-4027.06	-4025.39	-3777.68
TCD	Africa	y2090	125015	121951	121951	121917	122160		TCD	Africa	y2090	-3064.72	-3063.91	-3097.96	-2855.53
CAF	Africa	y2090	22589.9	20777.8	20778	20772.2	20813.5		CAF	Africa	y2090	-1812.08	-1811.94	-1817.75	-1776.44
ZAF	Africa	y2090	244972	215370	215371	215311	215739		ZAF	Africa	y2090	-29602.1	-29600.7	-29660.8	-29232.7
BWA	Africa	y2090	7948.67	9001.59	9001.65	8999.14	9017.03		BWA	Africa	y2090	1052.92	1052.98	1050.46	1068.36
ZMB	Africa	y2090	149463	155285	155286	155243	155551		ZMB	Africa	y2090	5822.38	5823.41	5780.05	6088.74
SDN	Africa	y2090	254208	241528	241190	241206	243588		SDN	Africa	y2090	-12680.1	-13018.2	-13002.1	-10620.8
ZWE	Africa	y2090	68401.9	64531.7	64532.2	64514.2	64642.4		ZWE	Africa	y2090	-3870.12	-3869.69	-3887.71	-3759.43
LSO	Africa	y2090	7773.51	6539.81	6539.86	6538.03	6551.03		LSO	Africa	y2090	-1233.7	-1233.66	-1235.49	-1222.48
BDI	Africa	y2090	65317.5	58950.1	58950.5	58934	59051.2		BDI	Africa	y2090	-6367.39	-6367	-6383.46	-6266.27
RWA	Africa	y2090	93770	85135.8	85136.3	85112.6	85281.8		RWA	Africa	y2090	-8634.24	-8633.67	-8657.44	-8488.2
TZA	Africa	y2090	507349	481379	481383	481248	482205		TZA	Africa	y2090	-25970.1	-25966.9	-26101.3	-25144.4
UGA	Africa	y2090	514169	452556	452559	452432	453332		UGA	Africa	y2090	-61613	-61610	-61736.4	-60836.8
MOZ	Africa	y2090	215199	184445	184447	184395	184762		MOZ	Africa	y2090	-30753.2	-30752	-30803.5	-30436.8
SWZ	Africa	y2090	4017.05	4262.05	4262.08	4260.89	4269.36		SWZ	Africa	y2090	244.996	245.025	243.835	252.307
MWI	Africa	y2090	212062	180448	180450	180399	180758		MWI	Africa	y2090	-31613.7	-31612.5	-31662.9	-31304.1
ETH	Africa	y2090	675647	624742	624746	624572	625814		ETH	Africa	y2090	-50904.6	-50900.4	-51074.9	-49832.9
EGY	Africa	y2090	641478	481717	481042	481074	485824		EGY	Africa	y2090	-159762	-160436	-160404	-155655
KEN	Africa	y2090	359998	343375	343377	343281	343964		KEN	Africa	y2090	-16622.6	-16620.3	-16716.2	-16033.6
ERI	Africa	y2090	15624.7	15001.3	15001.4	14997.2	15027		ERI	Africa	y2090	-623.414	-623.315	-627.504	-597.682
SOM	Africa	y2090	108453	117989	117990	117957	118191		SOM	Africa	y2090	9536.17	9536.96	9504.01	9738.56
DJI	Africa	y2090	5172.27	4846.22	4846.25	4844.9	4854.53		DJI	Africa	y2090	-326.046	-326.014	-327.367	-317.734
MDG	Africa	y2090	188773	183708	183709	183658	184023		MDG	Africa	y2090	-5065.35	-5064.12	-5115.42	-4750.23
MUS	Africa	y2090	2874.48	2504.72	2504.73	2504.03	2509.01		MUS	Africa	y2090	-369.763	-369.746	-370.445	-365.466
ATF	Asia	y2090	0.760666	0.697632	0.697881	0.697651	0.697935		ATF	Asia	y2090	-0.0630335	-0.0627842	-0.0630149	-0.0627306
CHN	Asia	y2090	3.08652e+06	2.67958e+06	2.68047e+06	2.67956e+06	2.67626e+06		CHN	Asia	y2090	-406943	-406051	-406961	-410262
IND	Asia	y2090	4.87896e+06	4.60468e+06	4.6062e+06	4.60469e+06	4.59898e+06		IND	Asia	y2090	-274280	-272762	-274265	-279983
NPL	Asia	y2090	130146	112064	112104	112067	112112		NPL	Asia	y2090	-18082.5	-18042.5	-18079.5	-18033.8
MNG	Asia	y2090	11794.5	11761.1	11765.3	11761.4	11766.2		MNG	Asia	y2090	-33.4656	-29.2626	-33.1514	-28.3592
MMR	Asia	y2090	138980	134505	134553	134509	134563		MMR	Asia	y2090	-4475.27	-4427.2	-4471.68	-4416.87
LAO	Asia	y2090	26883.3	25359.9	25369	25360.6	25370.9		LAO	Asia	y2090	-1523.4	-1514.34	-1522.72	-1512.39
THA	Asia	y2090	161584	153779	153834	153783	153845		THA	Asia	y2090	-7805.14	-7750.19	-7801.03	-7738.37
KHM	Asia	y2090	71817	64351.2	64374.2	64352.9	64379.1		KHM	Asia	y2090	-7465.85	-7442.86	-7464.13	-7437.91
VNM	Asia	y2090	284807	257632	257724	257639	257744		VNM	Asia	y2090	-27174.6	-27082.5	-27167.7	-27062.7
RUS	Europe	y2090	471860	396885	396943	396820	396462		RUS	Europe	y2090	-74974.6	-74916.4	-75039.4	-75397.7
PRK	Asia	y2090	37687.5	57710.1	57730.8	57711.7	57735.2		PRK	Asia	y2090	20022.7	20043.3	20024.2	20047.7
GRL	Europe	y2090	148.097	128.179	128.174	128.15	128.007		GRL	Europe	y2090	-19.9183	-19.9226	-19.9465	-20.0901
ISL	Europe	y2090	1571.61	1382.98	1382.93	1382.68	1381.13		ISL	Europe	y2090	-188.629	-188.676	-188.934	-190.483
[truncated: 290 more rows]
