# Supplementary material for: Transitioning to healthy and sustainable diets has high environmental and affordability trade-offs for developing countries
Source: Research Square preprint supplement (doi:10.21203/rs.3.rs-3278140/v1), 2023-08-29
Supplement: Supplementary file 3 [file 3199334779f210f4c2919596.xlsx]

## Sheet: Country-level
Year	Region	Income-group	BaU	EAT	HUS	MED	VEG
y2025	SEN	Developing country	4.27779	4.2775	4.27763	4.2879	4.28978
y2025	GMB	Developing country	0.0921121	0.0921102	0.0921159	0.0921193	0.0921054
y2025	MRT	Developing country	1.09265	1.09086	1.0909	1.15195	1.1651
y2025	ESH	Developing country	3.1e-14	3.1e-14	3.1e-14	3.1e-14	3.1e-14
y2025	GNB	Developing country	0.543074	0.543063	0.543096	0.543116	0.543034
y2025	GIN	Developing country	5.46484	5.46477	5.46517	5.46531	5.46445
y2025	SLE	Developing country	1.36224	1.36225	1.36238	1.36239	1.36215
y2025	MLI	Developing country	6.53029	6.53006	6.53035	6.54727	6.55018
y2025	LBR	Developing country	1.3677	1.36769	1.36796	1.36792	1.3676
y2025	CIV	Developing country	12.7363	12.7364	12.7377	12.7377	12.7355
y2025	BFA	Developing country	4.85322	4.85307	4.85332	4.85348	4.85285
y2025	GHA	Developing country	8.75179	8.75151	8.75234	8.75242	8.7509
y2025	TGO	Developing country	2.66362	2.66362	2.66387	2.66388	2.66345
y2025	NER	Developing country	19.9178	18.5483	20.8356	21.0931	18.2176
y2025	BEN	Developing country	2.52108	2.52091	2.52139	2.5214	2.52068
y2025	DZA	Developing country	3.33136	3.33091	3.33147	3.33149	3.33088
y2025	NGA	Developing country	41.6613	41.6612	41.6633	41.6548	41.6591
y2025	CMR	Developing country	11.8305	11.8303	11.8314	11.8314	11.8297
y2025	GAB	Developing country	2.03105	2.03096	2.03123	2.03121	2.03087
y2025	GNQ	Developing country	0.55857	0.558536	0.558836	0.558752	0.558517
y2025	NAM	Developing country	0.812143	0.812377	0.812551	0.812144	0.811841
y2025	AGO	Developing country	3.47553	3.52323	3.50382	3.52469	3.53296
y2025	COG	Developing country	2.45973	2.45963	2.45992	2.4599	2.4595
y2025	COD	Developing country	23.1668	23.2302	23.1611	23.2966	23.2023
y2025	LBY	Developing country	10.3439	10.3439	10.344	10.344	10.3439
y2025	TCD	Developing country	4.39792	4.39768	4.39801	4.40198	4.40234
y2025	CAF	Developing country	4.63677	4.63681	4.63559	4.63721	4.63723
y2025	ZAF	Developing country	25.1066	25.203	25.2987	24.6935	25.1369
y2025	BWA	Developing country	0.511487	0.5114	0.511531	0.511531	0.511286
y2025	ZMB	Developing country	1.24443	1.08979	1.08476	1.26375	1.08336
y2025	SDN	Developing country	28.586	28.3269	28.444	28.4111	28.3064
y2025	ZWE	Developing country	3.64156	3.64389	3.64527	3.47828	3.64337
y2025	LSO	Developing country	0.135299	0.133227	0.133294	0.133294	0.133197
y2025	BDI	Developing country	0.7128	0.714342	0.70098	0.719007	0.722496
y2025	RWA	Developing country	0.234735	0.236015	0.225026	0.239818	0.242721
y2025	TZA	Developing country	2.69758	2.63003	2.66978	2.6269	2.6893
y2025	UGA	Developing country	1.96512	1.97247	1.88635	2.00137	2.0246
y2025	MOZ	Developing country	2.00679	1.90271	1.90362	1.95804	1.90188
y2025	SWZ	Developing country	0.0935703	0.0981403	0.098209	0.0879659	0.0981316
y2025	MWI	Developing country	0.346893	0.574001	0.575147	0.315157	0.574367
y2025	ETH	Developing country	6.57467	6.82485	6.82714	6.80046	6.83371
y2025	EGY	Developing country	47.8737	47.8748	47.8749	47.8749	47.8743
y2025	KEN	Developing country	3.51262	3.51902	3.50545	3.49967	3.52765
y2025	ERI	Developing country	0.447406	0.44146	0.441567	0.444707	0.445234
y2025	SOM	Developing country	3.88412	3.89172	3.89199	3.88222	3.88455
y2025	DJI	Developing country	0.00318155	0.00318151	0.00318157	0.00341986	0.00347136
y2025	MDG	Developing country	8.36345	8.31299	8.25466	8.3445	8.3555
y2025	MUS	Developing country	0	0	0	0	0
y2025	ATF	Developing country	0	0	0	0	0
y2025	CHN	Developing country	711.935	703.114	708.245	703.203	708.853
y2025	IND	Developing country	1289.64	1283.13	1294.52	1294.84	1283.61
y2025	NPL	Developing country	18.3924	21.4663	20.1567	20.1996	20.2384
y2025	MNG	Developing country	1.29818	1.2903	1.29879	1.29996	1.29019
y2025	MMR	Developing country	83.5326	89.9161	92.2107	89.9615	87.8965
y2025	LAO	Developing country	43.3004	51.758	49.5711	49.5997	48.1317
y2025	THA	Developing country	121.026	117.247	117.17	113.99	118.057
y2025	KHM	Developing country	27.8391	29.1149	29.7624	28.9972	28.7268
y2025	VNM	Developing country	75.3761	88.9111	84.219	84.3657	82.9862
y2025	RUS	Developing country	154.138	154.376	154.382	154.382	154.372
y2025	PRK	Developing country	12.6318	13.9858	12.4828	12.4997	13.7909
y2025	GRL	Developed income	1.08132	1.08132	1.08132	1.08131	1.08132
y2025	ISL	Developing country	0.928358	0.928141	0.928215	0.928056	0.928201
y2025	ESP	Developed income	34.4095	34.3329	34.5608	34.4516	34.3327
y2025	IRL	Developing country	0.834828	0.834562	0.83462	0.83462	0.834632
y2025	PRT	Developing country	4.80449	4.80449	4.80449	4.80449	4.80448
y2025	GBR	Developed income	5.47935	5.47613	5.47918	5.47922	5.47577
y2025	FRA	Developed income	26.5732	24.0494	31.5665	27.9639	24.0459
y2025	BEL	Developed income	0.754775	0.754241	0.754799	0.754805	0.754154
y2025	NLD	Developing country	0.737198	0.736739	0.737221	0.737227	0.736664
y2025	NOR	Developing country	3.45146	3.4506	3.45091	3.45035	3.4508
y2025	LUX	Developing country	0.0363954	0.0363636	0.0363969	0.0363973	0.0363584
y2025	DEU	Developed income	9.72831	9.60195	9.96377	9.79422	9.60057
y2025	CHE	Developed income	0.356486	0.356311	0.356396	0.356381	0.356295
y2025	ITA	Developing country	28.0254	27.7854	28.5008	28.1578	27.7851
y2025	DNK	Developed income	1.64075	1.63932	1.64082	1.64083	1.63908
y2025	AUT	Developed income	2.13195	2.0156	2.36165	2.19592	2.01541
y2025	SWE	Developing country	2.59256	2.59176	2.59213	2.59213	2.59186
y2025	CZE	Developed income	2.62366	2.59831	2.66976	2.63659	2.59794
y2025	HRV	Developing country	1.88547	1.64179	2.36809	2.01987	1.64149
y2025	SVN	Developing country	0.316987	0.273809	0.402499	0.340801	0.273756
y2025	SJM	Developing country	0.073891	0.073891	0.073891	0.073891	0.073891
y2025	POL	Developing country	11.2434	11.2337	11.2438	11.244	11.2321
y2025	BIH	Developing country	0.915469	0.91487	0.91518	0.915216	0.914765
y2025	HUN	Developing country	7.16783	6.16095	9.16227	7.72324	6.15973
y2025	SVK	Developing country	1.8553	1.75164	2.05936	1.91214	1.75142
y2025	MNE	Developing country	0.17782	0.177703	0.177764	0.177771	0.177682
y2025	SRB	Developing country	3.53874	3.53641	3.53762	3.53776	3.536
y2025	ALB	Developing country	0.51607	0.5158	0.51594	0.515957	0.515752
y2025	GRC	Developed income	8.42988	8.42988	8.42988	8.42988	8.42987
y2025	MKD	Developing country	0.606074	0.605729	0.605908	0.60593	0.605667
y2025	ROU	Developed income	15.8504	14.2229	19.0732	16.7479	14.2209
y2025	LTU	Developing country	2.34082	2.33878	2.34092	2.34095	2.33844
y2025	LVA	Developing country	0.723445	0.722825	0.723471	0.723478	0.722725
y2025	FIN	Developed income	1.92064	1.92013	1.92016	1.92016	1.92031
y2025	EST	Developed income	0.709098	0.708686	0.709019	0.709023	0.708668
y2025	BGR	Developing country	7.05644	6.55774	8.04392	7.33141	6.55713
y2025	BLR	Developing country	2.70082	2.72082	2.72108	2.72108	2.72026
y2025	TUR	Developing country	18.7653	18.7637	18.7645	18.7646	18.7634
y2025	MDA	Developing country	0.959821	0.969044	0.969125	0.969124	0.969094
y2025	CYP	Developed income	0.159699	0.159699	0.159699	0.159699	0.159699
y2025	IRN	Developing country	32.8799	32.8799	32.8799	32.8799	32.8799
y2025	UKR	Developing country	15.0468	15.1899	15.1912	15.1912	15.1902
y2025	GEO	Developing country	0.520084	0.522943	0.52299	0.522989	0.522766
y2025	ARM	Developing country	0.497949	0.497907	0.497926	0.497926	0.497901
y2025	AZE	Developing country	3.65456	3.65497	3.65506	3.65506	3.65492
y2025	KAZ	Developing country	22.3972	22.3944	22.3957	22.3958	22.3939
y2025	TKM	Developing country	8.65807	8.65826	8.65816	8.65826	8.65822
y2025	UZB	Developing country	19.7555	19.7571	19.7562	19.7572	19.7568
y2025	AFG	Developing country	9.39063	9.40942	9.30854	9.31777	9.44229
y2025	TJK	Developing country	3.70706	3.70452	3.70591	3.70454	3.70508
y2025	KGZ	Developing country	3.67849	3.67835	3.67841	3.67841	3.67834
y2025	MEX	Developing country	121.283	118.392	115.81	117.032	117.684
y2025	USA	Developed income	306.654	301.59	307.863	307.566	297.484
y2025	GTM	Developing country	6.26349	5.88819	6.17556	6.44086	5.4612
y2025	ECU	Developing country	10.1355	10.1464	10.1431	10.1413	10.1458
y2025	SLV	Developing country	1.97584	2.08808	1.81817	2.0383	2.16673
y2025	HND	Developing country	5.1905	5.19374	5.20558	5.35687	5.15076
y2025	BLZ	Developing country	0.631102	0.418345	0.631083	0.685751	0.198438
y2025	NIC	Developing country	5.38583	5.42522	5.36893	5.48693	5.41259
y2025	CRI	Developing country	2.4952	2.39035	2.50571	2.52374	2.2779
y2025	CUB	Developing country	9.728	10.3822	9.55403	9.3537	11.0846
y2025	PAN	Developing country	3.98686	3.96369	4.00885	3.99612	3.93474
y2025	PER	Developing country	21.82	21.8487	21.8324	21.8479	21.8442
y2025	COL	Developing country	36.9555	36.5773	36.9724	37.0144	36.1756
y2025	BHS	Developed income	0.0445677	0.024753	0.0445661	0.0496577	0.0043274
y2025	JAM	Developing country	0.347469	0.338391	0.347454	0.349776	0.328128
y2025	CHL	Developed income	30.0082	30.0214	30.0167	30.0143	30.0229
y2025	HTI	Developing country	2.30321	2.51468	2.23421	2.28334	2.71026
y2025	BRA	Developing country	160.366	160.369	159.523	160.244	159.123
y2025	ARG	Developing country	35.5583	35.3097	35.461	35.4577	35.3929
y2025	VEN	Developing country	41.1657	41.0995	41.0712	41.0601	41.0702
y2025	DOM	Developing country	4.04192	4.10227	3.90724	3.89764	4.19682
y2025	BOL	Developing country	8.14191	8.04726	8.14221	8.15609	8.00532
y2025	PRY	Developing country	3.85981	3.86308	3.85928	3.85928	3.856
y2025	TTO	Developing country	1.48917	1.48912	1.48916	1.48916	1.48909
y2025	FLK	Developing country	8e-15	8e-15	8e-15	8e-15	8e-15
y2025	GUY	Developing country	11.0128	10.9932	10.9432	11.0006	11.0025
y2025	URY	Developed income	8.25961	8.3915	8.25901	8.25877	8.32228
y2025	SUR	Developing country	1.68118	1.68114	1.68117	1.68117	1.68112
y2025	GUF	Developing country	0.18286	0.182852	0.182857	0.182857	0.182849
y2025	SGS	Developing country	1e-15	1e-15	1e-15	1e-15	1e-15
y2025	MAR	Developing country	37.8428	37.8419	37.8419	37.8419	37.8419
y2025	TUN	Developing country	4.13693	4.13691	4.13694	4.13694	4.1369
y2025	SAU	Developing country	8.0284	8.0284	8.0284	8.0284	8.0284
y2025	ISR	Developing country	0.562569	0.562569	0.562569	0.562569	0.562569
y2025	JOR	Developing country	0.283637	0.283637	0.283637	0.283637	0.283637
y2025	LBN	Developing country	1.09441	1.09441	1.09441	1.09441	1.09441
y2025	SYR	Developing country	2.83774	2.83774	2.83774	2.83774	2.83774
y2025	IRQ	Developing country	4.72021	4.71999	4.71999	4.71999	4.71999
y2025	YEM	Developing country	3.29763	3.29763	3.29763	3.29763	3.29763
y2025	KWT	Developing country	0.137786	0.137786	0.137786	0.137786	0.137786
y2025	QAT	Developing country	0.0116244	0.0116244	0.0116244	0.0116244	0.0116244
y2025	OMN	Developing country	0.190732	0.190732	0.190732	0.190732	0.190732
y2025	ARE	Developed income	0.273208	0.273208	0.273208	0.273208	0.273208
y2025	PAK	Developing country	106.091	105.787	104.67	104.38	106.07
y2025	CAN	Developed income	61.3064	61.2431	61.2667	61.2656	61.2365
y2025	PRI	Developing country	0.280494	0.26689	0.280486	0.283976	0.252016
y2025	AUS	Developed income	23.3953	23.3774	23.3841	23.3838	23.3756
y2025	JPN	Developing country	33.1658	32.7158	32.8416	32.8972	33.2058
y2025	NZL	Developing country	11.1194	11.1171	11.118	11.1179	11.1169
y2025	IDN	Developing country	94.4367	94.8171	94.714	94.6977	94.6397
y2025	MYS	Developing country	16.6809	16.6804	16.6832	16.6818	16.6784
y2025	SGP	Developing country	0.0478285	0.0478268	0.0478362	0.0478313	0.04782
y2025	BRN	Developed income	0.0823395	0.0823365	0.0823528	0.0823443	0.0823249
y2025	PHL	Developing country	28.6687	28.4642	28.3544	27.989	28.443
y2025	TLS	Developing country	0.852029	0.852029	0.852029	0.852029	0.852029
y2025	KOR	Developing country	12.8865	14.4325	13.0905	13.0677	14.0426
y2025	PNG	Developing country	4.63368	5.02917	4.90587	4.91056	4.85139
y2025	SLB	Developing country	0.0597093	0.0597071	0.059719	0.0597128	0.0596987
y2025	NCL	Developing country	0.0811023	0.108694	0.117014	0.1152	0.101
y2025	VUT	Developing country	0.0379983	0.037997	0.0380045	0.0380005	0.0379916
y2025	FJI	Developing country	0.276443	0.276164	0.276506	0.276483	0.276058
y2025	REU	Developing country	0.0059304	0.0059292	0.0059326	0.0059326	0.00592771
y2025	LKA	Developing country	13.5418	15.6479	14.9753	15.0128	14.7095
y2025	BGD	Developing country	49.3562	56.4065	53.8148	53.7035	53.1009
y2025	BTN	Developing country	0.419028	0.449896	0.435125	0.433331	0.436604
y2030	SEN	Developing country	4.31961	4.24341	4.24395	4.25341	4.32994
y2030	GMB	Developing country	0.0920733	0.0920526	0.0920705	0.0920763	0.0920414
y2030	MRT	Developing country	1.11626	1.11604	1.11617	1.17258	1.18255
y2030	ESH	Developing country	3.3e-14	3.2e-14	3.2e-14	3.3e-14	3.2e-14
y2030	GNB	Developing country	0.54324	0.543118	0.543224	0.543258	0.543052
y2030	GIN	Developing country	5.53435	5.53345	5.53466	5.54491	5.53267
y2030	SLE	Developing country	1.41775	1.41771	1.4181	1.42616	1.41746
y2030	MLI	Developing country	6.55052	6.49528	6.4963	6.512	6.56703
y2030	LBR	Developing country	1.42065	1.42063	1.4214	1.42921	1.42036
y2030	CIV	Developing country	13.1895	13.1889	13.1928	13.2638	13.1866
y2030	BFA	Developing country	4.87665	4.87569	4.87657	4.87681	4.87516
y2030	GHA	Developing country	9.04478	9.04431	9.04673	9.09275	9.04273
y2030	TGO	Developing country	2.76031	2.76025	2.76097	2.7717	2.75979
y2030	NER	Developing country	20.9325	18.4415	18.443	20.5569	21.2107
y2030	BEN	Developing country	2.49575	2.60198	2.60332	2.60875	2.60138
y2030	DZA	Developing country	3.15454	3.14249	3.14329	3.16032	3.14249
y2030	NGA	Developing country	42.6167	38.4012	42.4847	42.5241	42.6114
y2030	CMR	Developing country	12.0746	12.0739	12.0771	12.0977	12.0724
y2030	GAB	Developing country	2.03882	2.03852	2.03929	2.03924	2.03828
y2030	GNQ	Developing country	0.559719	0.559656	0.560482	0.560283	0.55956
y2030	NAM	Developing country	0.829115	0.814675	0.832187	0.827316	0.833008
y2030	AGO	Developing country	3.45885	3.42032	3.40523	3.4406	3.47589
y2030	COG	Developing country	2.47459	2.47426	2.47513	2.47607	2.47397
y2030	COD	Developing country	23.4197	23.7718	23.3322	23.5754	23.434
y2030	LBY	Developing country	10.4581	10.3532	10.3534	10.51	10.3532
y2030	TCD	Developing country	4.51586	4.51282	4.51382	4.51748	4.51921
y2030	CAF	Developing country	4.65135	4.64556	4.64511	4.6507	4.64998
y2030	ZAF	Developing country	25.6272	21.6016	25.3514	24.1585	25.3335
y2030	BWA	Developing country	0.506808	0.516697	0.517125	0.517133	0.516869
y2030	ZMB	Developing country	1.29615	1.13019	1.33253	1.31127	1.29027
y2030	SDN	Developing country	29.145	29.0336	28.7653	28.8613	29.0549
y2030	ZWE	Developing country	3.76509	3.55551	3.78472	3.55765	3.65664
y2030	LSO	Developing country	0.146821	0.146744	0.146929	0.14693	0.146663
y2030	BDI	Developing country	0.746689	0.704766	0.693018	0.75523	0.756788
y2030	RWA	Developing country	0.261719	0.227424	0.217691	0.268681	0.27009
y2030	TZA	Developing country	2.76513	2.58785	2.72526	2.6813	2.75272
y2030	UGA	Developing country	2.18497	1.91734	1.8418	2.23842	2.24997
y2030	MOZ	Developing country	2.09762	1.87795	2.11779	2.02259	2.04589
y2030	SWZ	Developing country	0.0981686	0.0991396	0.097489	0.0906768	0.0942413
y2030	MWI	Developing country	0.360441	0.590694	0.309004	0.309316	0.341505
y2030	ETH	Developing country	7.71192	7.44563	7.72259	7.67634	7.73027
y2030	EGY	Developing country	48.7022	47.9182	47.9184	49.0834	47.9182
y2030	KEN	Developing country	3.75251	3.53279	3.68934	3.71942	3.75625
y2030	ERI	Developing country	0.46231	0.462163	0.462463	0.465327	0.465411
y2030	SOM	Developing country	3.92304	3.77747	3.89132	3.77821	3.92233
y2030	DJI	Developing country	0.00310994	0.00310981	0.00310998	0.00332283	0.00336037
y2030	MDG	Developing country	8.81424	8.2341	8.26597	8.50679	8.51263
y2030	MUS	Developing country	0	0	0	0	0
y2030	ATF	Developing country	0	0	0	0	0
y2030	CHN	Developing country	785.978	728.714	742.256	747.652	729.412
y2030	IND	Developing country	1263.81	1229.36	1301.6	1299.79	1247.37
y2030	NPL	Developing country	18.8345	23.4503	23.1493	24.4817	22.323
y2030	MNG	Developing country	1.32422	1.30592	1.32861	1.32988	1.30281
y2030	MMR	Developing country	89.5905	91.2732	99.277	98.4306	89.9117
y2030	LAO	Developing country	45.6154	58.0658	59.038	61.6234	53.8671
y2030	THA	Developing country	119.901	116.567	114.54	113.598	114.738
y2030	KHM	Developing country	29.2643	29.1095	31.3218	30.9133	28.9293
y2030	VNM	Developing country	78.0738	99.6676	98.7167	103.899	92.3399
y2030	RUS	Developing country	156.187	155.9	156.35	156.321	156.297
y2030	PRK	Developing country	12.5097	14.341	12.3779	14.0096	14.7104
y2030	GRL	Developed income	1.07946	1.07945	1.07945	1.07945	1.07946
y2030	ISL	Developing country	0.901785	0.901326	0.901324	0.900979	0.90151
y2030	ESP	Developed income	32.7021	32.626	32.8508	32.7432	32.6255
y2030	IRL	Developing country	0.818891	0.819023	0.818834	0.818836	0.818722
y2030	PRT	Developing country	4.51706	4.51706	4.51706	4.51706	4.51704
y2030	GBR	Developed income	5.33344	5.3275	5.33135	5.33146	5.32606
y2030	FRA	Developed income	26.0013	23.5029	30.8971	27.3562	23.4897
y2030	BEL	Developed income	0.730108	0.728955	0.729729	0.729749	0.728762
y2030	NLD	Developing country	0.711961	0.710965	0.711634	0.711652	0.710802
y2030	NOR	Developing country	3.35838	3.35661	3.35671	3.35546	3.35723
y2030	LUX	Developing country	0.0352449	0.0351758	0.0352222	0.0352235	0.0351645
y2030	DEU	Developed income	9.40197	9.26837	9.6267	9.4606	9.26504
y2030	CHE	Developed income	0.354753	0.354478	0.354646	0.354566	0.354449
y2030	ITA	Developing country	26.982	26.7451	27.4473	27.1109	26.744
y2030	DNK	Developed income	1.58352	1.58041	1.5825	1.58255	1.5799
y2030	AUT	Developed income	2.09257	1.97708	2.3178	2.15479	1.97637
y2030	SWE	Developing country	2.54531	2.54507	2.54502	2.54503	2.54436
y2030	CZE	Developed income	2.53864	2.51112	2.58225	2.54972	2.51024
y2030	HRV	Developing country	1.8554	1.61408	2.32953	1.98674	1.6129
y2030	SVN	Developing country	0.312703	0.269872	0.396851	0.336012	0.26966
y2030	SJM	Developing country	0.0730089	0.0730089	0.0730089	0.0730089	0.0730089
y2030	POL	Developing country	10.863	10.842	10.8561	10.8565	10.8385
y2030	BIH	Developing country	0.92626	0.925389	0.9261	0.92598	0.925152
y2030	HUN	Developing country	7.04813	6.05274	9.00452	7.59013	6.04789
y2030	SVK	Developing country	1.81466	1.71151	2.01435	1.86969	1.71076
y2030	MNE	Developing country	0.180093	0.179923	0.180063	0.18004	0.179876
y2030	SRB	Developing country	3.5773	3.57391	3.57669	3.57623	3.57298
y2030	ALB	Developing country	0.518814	0.518422	0.518744	0.518692	0.518329
y2030	GRC	Developed income	8.08493	8.08493	8.08493	8.08493	8.08491
y2030	MKD	Developing country	0.611113	0.610611	0.611024	0.610957	0.610396
y2030	ROU	Developed income	15.5402	13.9301	18.7032	16.4163	13.9221
y2030	LTU	Developing country	2.26372	2.25929	2.26227	2.26235	2.25856
y2030	LVA	Developing country	0.702927	0.701588	0.702486	0.70251	0.701362
y2030	FIN	Developed income	1.87758	1.8781	1.87752	1.87752	1.87745
y2030	EST	Developed income	0.692121	0.691539	0.691885	0.691898	0.691299
y2030	BGR	Developing country	6.89662	6.40318	7.86588	7.16508	6.40068
y2030	BLR	Developing country	2.75324	2.7327	2.76829	2.76606	2.76712
y2030	TUR	Developing country	18.5382	18.5359	18.5378	18.5375	18.5353
y2030	MDA	Developing country	0.976039	0.966878	0.983418	0.982401	0.983038
y2030	CYP	Developed income	0.14894	0.14894	0.14894	0.14894	0.14894
y2030	IRN	Developing country	33.2839	33.2847	33.2839	33.2839	33.2847
y2030	UKR	Developing country	15.3002	15.1579	15.4141	15.3983	15.4082
y2030	GEO	Developing country	0.529204	0.526224	0.531242	0.53092	0.53106
y2030	ARM	Developing country	0.498616	0.497656	0.497997	0.497869	0.496294
y2030	AZE	Developing country	3.63197	3.61942	3.62466	3.62286	3.60436
y2030	KAZ	Developing country	22.437	22.4049	22.4168	22.4134	22.3728
y2030	TKM	Developing country	8.74552	8.72899	8.73454	8.73226	8.70078
y2030	UZB	Developing country	19.6636	19.5967	19.6184	19.6101	19.52
y2030	AFG	Developing country	9.43026	9.36049	9.35782	9.41188	9.56293
y2030	TJK	Developing country	3.69659	3.68137	3.68899	3.68388	3.65801
y2030	KGZ	Developing country	3.65837	3.64781	3.6515	3.64995	3.63221
y2030	MEX	Developing country	139.945	120.915	110.789	124.924	99.244
y2030	USA	Developed income	301.081	287.405	299.405	296.659	281.897
y2030	GTM	Developing country	7.01197	5.76315	6.72563	6.34997	4.9059
y2030	ECU	Developing country	10.2662	10.2752	10.2838	10.2261	10.1967
y2030	SLV	Developing country	2.52371	2.11631	1.80423	1.73872	2.09747
y2030	HND	Developing country	6.09019	5.23191	5.46248	5.33451	4.88255
y2030	BLZ	Developing country	0.76188	0.40037	0.874516	0.730824	0.167792
y2030	NIC	Developing country	6.04704	5.56796	5.59112	5.53167	5.36984
y2030	CRI	Developing country	2.57805	2.37254	2.64291	2.57057	2.184
y2030	CUB	Developing country	9.53214	10.0263	8.48728	9.34346	9.04692
y2030	PAN	Developing country	4.04015	3.98766	4.07249	4.05689	3.91776
y2030	PER	Developing country	22.3006	21.9786	21.9773	21.96	21.7989
y2030	COL	Developing country	37.4882	36.7621	37.5631	37.3533	36.0158
y2030	BHS	Developed income	0.0567189	0.0237317	0.0672117	0.0538268	0.00374522
y2030	JAM	Developing country	0.355148	0.328487	0.359878	0.353795	0.291241
y2030	CHL	Developed income	31.5579	29.5478	29.5545	29.5376	29.5055
y2030	HTI	Developing country	2.41704	2.44438	2.03749	2.12119	2.3836
y2030	BRA	Developing country	161.217	163.109	162.22	162.121	161.847
y2030	ARG	Developing country	37.639	35.33	35.8706	36.0185	35.3887
y2030	VEN	Developing country	41.6991	41.5504	41.366	41.5411	41.2174
y2030	DOM	Developing country	4.25592	4.01567	3.61095	3.93992	3.36888
y2030	BOL	Developing country	8.50825	8.17224	8.42012	8.40734	8.15616
y2030	PRY	Developing country	3.95268	3.9069	3.95377	3.9435	3.93852
y2030	TTO	Developing country	1.49887	1.49878	1.49886	1.49886	1.49877
y2030	FLK	Developing country	9e-15	9e-15	9e-15	9e-15	9e-15
y2030	GUY	Developing country	11.088	11.0679	11.0176	11.0757	11.0774
y2030	URY	Developed income	8.37741	8.65188	8.37418	8.37285	8.43469
y2030	SUR	Developing country	1.69484	1.69472	1.69482	1.69482	1.69411
y2030	GUF	Developing country	0.186367	0.186338	0.186361	0.186361	0.185818
y2030	SGS	Developing country	1e-15	1e-15	1e-15	1e-15	1e-15
y2030	MAR	Developing country	37.9675	37.966	37.966	37.9668	37.966
y2030	TUN	Developing country	4.58042	4.03863	4.0387	4.84768	4.03858
y2030	SAU	Developing country	7.83064	7.86427	7.83078	7.82709	7.86427
y2030	ISR	Developing country	0.625763	0.625763	0.625763	0.625763	0.625763
y2030	JOR	Developing country	0.317209	0.317209	0.317209	0.317209	0.317209
y2030	LBN	Developing country	1.12749	1.12749	1.12749	1.13165	1.12749
y2030	SYR	Developing country	2.94753	2.94753	2.94753	2.94753	2.94753
y2030	IRQ	Developing country	4.76862	4.76841	4.76841	4.76841	4.76841
y2030	YEM	Developing country	3.31395	3.32288	3.31399	3.3133	3.32288
y2030	KWT	Developing country	0.148807	0.148807	0.148807	0.148807	0.148807
y2030	QAT	Developing country	0.0100312	0.0100312	0.0100312	0.0100312	0.0100312
y2030	OMN	Developing country	0.185062	0.187487	0.185068	0.185068	0.187487
y2030	ARE	Developed income	0.211087	0.211087	0.211087	0.207156	0.211087
y2030	PAK	Developing country	105.516	105.197	104.22	104.793	106.241
y2030	CAN	Developed income	61.5909	61.4819	61.4934	61.4837	61.4629
y2030	PRI	Developing country	0.2897	0.256406	0.296856	0.287702	0.216638
y2030	AUS	Developed income	22.7718	22.7387	22.7439	22.7393	22.7356
y2030	JPN	Developing country	32.6582	32.166	32.8474	32.8329	32.9695
y2030	NZL	Developing country	11.2035	11.1996	11.2	11.1997	11.1881
y2030	IDN	Developing country	95.0087	95.5179	95.6368	95.514	95.3655
y2030	MYS	Developing country	16.9414	16.9193	16.9443	16.8719	16.9354
y2030	SGP	Developing country	0.0488852	0.0488103	0.0488948	0.0486498	0.0488647
y2030	BRN	Developed income	0.0844537	0.0843243	0.0844703	0.084047	0.0844183
y2030	PHL	Developing country	28.8123	28.8335	28.5754	28.4969	28.4822
y2030	TLS	Developing country	0.831024	0.831024	0.831024	0.825279	0.831024
y2030	KOR	Developing country	12.98	15.5108	13.1616	14.8785	15.0091
y2030	PNG	Developing country	4.75653	5.39927	5.37702	5.5116	5.16104
y2030	SLB	Developing country	0.0621485	0.0620533	0.0621608	0.0618493	0.0621225
y2030	NCL	Developing country	0.104451	0.112783	0.147077	0.144416	0.114539
y2030	VUT	Developing country	0.0389287	0.0388691	0.0389364	0.0387413	0.0389124
y2030	FJI	Developing country	0.284342	0.28336	0.284598	0.283426	0.283437
y2030	REU	Developing country	0.00645025	0.00644621	0.00645543	0.00645549	0.00644225
y2030	LKA	Developing country	13.9866	17.3118	17.3825	18.0882	16.1984
y2030	BGD	Developing country	50.3856	62.1936	61.8421	64.398	57.8871
y2030	BTN	Developing country	0.431009	0.494828	0.445569	0.474712	0.45524
y2035	SEN	Developing country	4.35384	4.25703	4.25582	4.28245	4.28807
y2035	GMB	Developing country	0.0922568	0.0922195	0.0921397	0.0922683	0.092192
y2035	MRT	Developing country	1.13796	1.12983	1.13717	1.18947	1.19917
y2035	ESH	Developing country	3.4e-14	3.3e-14	3.1e-14	3.2e-14	3.1e-14
y2035	GNB	Developing country	0.544732	0.544512	0.544603	0.544799	0.544349
y2035	GIN	Developing country	5.66747	5.66575	5.67011	5.66888	5.66386
y2035	SLE	Developing country	1.51859	1.51844	1.51945	1.51935	1.51783
y2035	MLI	Developing country	6.57688	6.50091	6.50747	6.5334	6.53767
y2035	LBR	Developing country	1.51648	1.51651	1.51817	1.52136	1.51572
y2035	CIV	Developing country	14.0267	14.0252	14.0367	14.0365	14.0196
y2035	BFA	Developing country	4.90652	4.88944	4.88936	4.903	4.90346
y2035	GHA	Developing country	9.57638	9.57512	9.57959	9.58105	9.57137
y2035	TGO	Developing country	2.92707	2.92681	2.92825	2.92847	2.92572
y2035	NER	Developing country	20.8306	18.3746	18.2905	19.8295	18.7782
y2035	BEN	Developing country	2.60682	2.30979	2.31162	2.53333	2.71528
y2035	DZA	Developing country	3.10356	3.10889	3.07763	3.08676	3.06797
y2035	NGA	Developing country	44.0374	41.8008	43.8169	41.8368	39.8846
y2035	CMR	Developing country	12.3716	12.3606	12.3716	10.6521	12.3659
y2035	GAB	Developing country	2.03535	2.03461	2.03628	2.03765	2.03398
y2035	GNQ	Developing country	0.558702	0.558803	0.560509	0.566288	0.558304
y2035	NAM	Developing country	0.840654	0.887553	0.84263	1.02065	0.827391
y2035	AGO	Developing country	3.23351	3.40285	3.4277	3.36181	3.32682
y2035	COG	Developing country	2.48225	2.48175	2.48337	2.48496	2.48071
y2035	COD	Developing country	23.4781	23.9844	24.2355	23.7936	23.5689
y2035	LBY	Developing country	10.6673	10.5372	10.4241	10.509	10.3418
y2035	TCD	Developing country	4.59977	4.58149	4.58402	6.02926	4.59927
y2035	CAF	Developing country	4.62815	4.63749	4.6365	5.38895	4.62588
y2035	ZAF	Developing country	25.0737	21.8924	23.8538	24.82	21.071
y2035	BWA	Developing country	0.501791	0.531342	0.505234	0.520645	0.510861
y2035	ZMB	Developing country	1.32858	1.36765	1.37905	1.39425	1.35986
y2035	SDN	Developing country	30.1692	28.311	28.8432	28.7416	29.2745
y2035	ZWE	Developing country	3.51692	3.32569	3.59812	4.15348	3.30404
y2035	LSO	Developing country	0.162777	0.162559	0.162978	0.227225	0.162371
y2035	BDI	Developing country	0.752798	0.770841	0.785516	0.746048	0.760468
y2035	RWA	Developing country	0.267877	0.282814	0.29457	0.262277	0.274387
y2035	TZA	Developing country	2.72285	2.57643	2.75442	2.63114	2.62587
y2035	UGA	Developing country	2.24802	2.36219	2.4551	2.20567	2.29834
y2035	MOZ	Developing country	2.04694	2.05218	2.19121	2.26242	1.95269
y2035	SWZ	Developing country	0.091705	0.0821603	0.0899534	0.0901019	0.087019
y2035	MWI	Developing country	0.347301	0.282122	0.290749	0.291576	0.303626
y2035	ETH	Developing country	8.51768	7.79039	8.01684	8.1634	8.52884
y2035	EGY	Developing country	50.1121	49.1398	48.2964	48.9294	47.6845
y2035	KEN	Developing country	3.94448	3.73277	3.72398	3.95024	3.93166
y2035	ERI	Developing country	0.48664	0.485558	0.486592	0.49122	0.489027
y2035	SOM	Developing country	3.98693	3.84215	3.84377	3.84389	3.84143
y2035	DJI	Developing country	0.00300422	0.00297758	0.00300427	0.00319163	0.00322641
y2035	MDG	Developing country	8.77377	8.57293	9.0927	8.62895	8.48275
y2035	MUS	Developing country	0	0	0	0	0
y2035	ATF	Developing country	0	0	0	0	0
y2035	CHN	Developing country	802.581	750.471	761.039	773.807	732.436
y2035	IND	Developing country	1225.96	1142.57	1302.84	1299.01	1200.12
y2035	NPL	Developing country	19.946	26.8224	25.7845	25.6534	23.3352
y2035	MNG	Developing country	1.35377	1.31672	1.36383	1.36509	1.30547
y2035	MMR	Developing country	94.8668	95.6987	102.315	100.036	86.2547
y2035	LAO	Developing country	50.0004	70.9806	68.6922	68.0153	60.119
y2035	THA	Developing country	116.436	100.759	106.769	103.928	107.87
y2035	KHM	Developing country	30.3329	29.5129	31.6246	30.832	27.5068
y2035	VNM	Developing country	84.1243	117.511	112.928	112.134	101.469
y2035	RUS	Developing country	157.584	156.918	157.186	157.358	153.423
y2035	PRK	Developing country	12.2443	11.0295	10.5793	10.9948	11.0254
y2035	GRL	Developed income	1.07668	1.07667	1.07667	1.07667	1.07667
y2035	ISL	Developing country	0.88162	0.880624	0.880713	0.880713	0.880558
y2035	ESP	Developed income	31.4048	31.3291	31.5504	31.4445	31.318
y2035	IRL	Developing country	0.799544	0.799328	0.799447	0.796443	0.796039
y2035	PRT	Developing country	4.29403	4.29403	4.29403	4.29403	4.29208
y2035	GBR	Developed income	5.18403	5.17535	5.18012	5.17488	4.38847
y2035	FRA	Developed income	25.3801	22.9038	30.165	26.6992	22.7172
y2035	BEL	Developed income	0.705112	0.703531	0.704401	0.704208	0.701107
y2035	NLD	Developing country	0.687688	0.686329	0.687077	0.686941	0.684427
y2035	NOR	Developing country	3.28692	3.283	3.28365	3.28362	3.2814
y2035	LUX	Developing country	0.0340027	0.0339081	0.0339602	0.0339508	0.0337515
y2035	DEU	Developed income	9.0651	8.92671	9.27968	9.11431	8.90438
y2035	CHE	Developed income	0.352319	0.351587	0.352126	0.352083	0.349953
y2035	ITA	Developing country	26.1689	25.9348	26.6229	26.2942	25.8632
y2035	DNK	Developed income	1.52427	1.52003	1.52236	1.52194	1.51795
y2035	AUT	Developed income	2.05222	1.93749	2.27231	2.11227	1.24813
y2035	SWE	Developing country	2.49405	2.49289	2.49352	2.4871	3.73315
y2035	CZE	Developed income	2.44848	2.4195	2.48973	2.45707	2.41418
y2035	HRV	Developing country	1.81769	1.57836	2.2819	1.94602	1.57488
y2035	SVN	Developing country	0.30685	0.264302	0.389372	0.329656	0.263194
y2035	SJM	Developing country	0.072093	0.072093	0.072093	0.072093	0.072093
y2035	POL	Developing country	10.4699	10.4412	10.457	10.4535	10.4222
y2035	BIH	Developing country	0.93039	0.927932	0.930148	0.929968	0.92122
y2035	HUN	Developing country	6.89692	5.91108	8.81021	7.42605	5.91
y2035	SVK	Developing country	1.77092	1.66826	1.96571	1.82368	1.36632
y2035	MNE	Developing country	0.181009	0.180527	0.180964	0.180928	0.179185
y2035	SRB	Developing country	3.5906	3.58106	3.58969	3.58899	3.55849
y2035	ALB	Developing country	0.519131	0.518039	0.519027	0.518946	0.515241
y2035	GRC	Developed income	7.82714	7.82714	7.82714	7.82714	7.82776
y2035	MKD	Developing country	0.612529	0.611113	0.612397	0.612292	0.607373
y2035	ROU	Developed income	15.2032	13.6074	18.2976	16.0577	13.5766
y2035	LTU	Developing country	2.18282	2.17675	2.18009	2.17949	2.17242
y2035	LVA	Developing country	0.680305	0.678459	0.679475	0.679223	0.674865
y2035	FIN	Developed income	1.83053	1.83034	1.83044	1.82365	2.60943
y2035	EST	Developed income	0.672978	0.672002	0.672539	0.671112	0.669011
y2035	BGR	Developing country	6.74386	6.25476	7.69213	7.00548	6.25299
y2035	BLR	Developing country	2.8036	2.7586	2.77202	2.78642	2.74911
y2035	TUR	Developing country	18.3858	18.3791	18.3851	18.3846	18.3622
y2035	MDA	Developing country	0.993684	0.974203	0.979728	0.986367	0.973807
y2035	CYP	Developed income	0.140894	0.140894	0.140894	0.140894	0.14068
y2035	IRN	Developing country	33.6857	33.6833	33.6833	33.6833	33.6857
y2035	UKR	Developing country	15.5739	15.2713	15.3567	15.4597	15.2631
y2035	GEO	Developing country	0.537432	0.530841	0.53277	0.534834	0.529102
y2035	ARM	Developing country	0.496373	0.494567	0.496102	0.496049	0.347556
y2035	AZE	Developing country	3.58602	3.56929	3.58297	3.58241	1.68966
y2035	KAZ	Developing country	22.3134	22.2292	22.2963	22.2971	17.4169
y2035	TKM	Developing country	8.75195	8.73544	8.75013	8.74853	6.06984
y2035	UZB	Developing country	19.4054	19.339	19.3985	19.3923	8.44904
y2035	AFG	Developing country	9.45226	9.36354	9.33518	9.34449	9.36051
y2035	TJK	Developing country	3.65729	3.63876	3.65417	3.6518	1.6237
y2035	KGZ	Developing country	3.61339	3.60027	3.61167	3.61075	1.93848
y2035	MEX	Developing country	139.699	100.007	137.085	121.754	96.4432
y2035	USA	Developed income	294.004	276.718	291.142	288.942	272.256
y2035	GTM	Developing country	7.12956	4.96803	6.99388	6.4202	4.69143
y2035	ECU	Developing country	10.4568	10.2601	10.3676	10.3309	10.054
y2035	SLV	Developing country	2.44331	1.99491	2.10468	1.48421	2.09656
y2035	HND	Developing country	6.1166	4.84863	5.80897	5.43255	4.82068
y2035	BLZ	Developing country	0.841848	0.319041	0.895565	0.818422	0.153922
y2035	NIC	Developing country	6.11292	5.44611	5.74173	5.543	5.30064
y2035	CRI	Developing country	2.62626	2.2339	2.45365	2.6149	2.00575
y2035	CUB	Developing country	9.2535	7.75813	9.02766	8.89051	8.30351
y2035	PAN	Developing country	4.07271	3.95449	3.57261	4.07043	3.56377
y2035	PER	Developing country	22.3214	21.5738	22.2693	22.0061	20.2682
y2035	COL	Developing country	37.9255	36.5333	35.6368	37.7188	33.2751
y2035	BHS	Developed income	0.0642193	0.0189399	0.0692255	0.0620386	0.00350125
y2035	JAM	Developing country	0.359321	0.281104	0.361504	0.358246	0.278023
y2035	CHL	Developed income	30.9599	28.8081	30.2972	28.8922	28.7835
y2035	HTI	Developing country	2.31244	2.06699	2.13319	1.93151	2.24419
y2035	BRA	Developing country	166.632	165.776	165.084	165.087	164.936
y2035	ARG	Developing country	37.3795	34.841	37.221	36.0003	34.9309
y2035	VEN	Developing country	42.1017	41.6662	42.0899	41.8736	42.1655
y2035	DOM	Developing country	4.20943	3.07514	4.10364	3.78612	3.133
y2035	BOL	Developing country	8.72339	8.25425	8.58181	8.6415	8.2645
y2035	PRY	Developing country	4.03101	3.97437	4.03352	4.03351	4.06733
y2035	TTO	Developing country	1.51154	1.51148	1.51157	1.51157	1.51147
y2035	FLK	Developing country	9e-15	9e-15	9e-15	9e-15	8e-15
y2035	GUY	Developing country	11.1895	11.1547	11.118	11.1774	11.2038
y2035	URY	Developed income	8.39111	8.65321	8.3764	8.37744	8.43441
y2035	SUR	Developing country	1.71561	1.71498	1.71561	1.71561	2.10294
y2035	GUF	Developing country	0.190627	0.190158	0.190621	0.190621	0.605012
y2035	SGS	Developing country	1e-15	1e-15	1e-15	1e-15	0
y2035	MAR	Developing country	38.0712	38.0698	38.0693	38.0697	38.069
y2035	TUN	Developing country	5.61975	4.94856	4.36414	4.80276	3.94014
y2035	SAU	Developing country	7.91434	7.82494	7.82484	7.82521	7.91427
y2035	ISR	Developing country	0.631872	0.631872	0.631872	0.631872	0.631872
y2035	JOR	Developing country	0.322643	0.322643	0.322643	0.322643	0.322643
y2035	LBN	Developing country	1.05954	1.05954	1.05954	1.06168	1.05954
y2035	SYR	Developing country	3.02109	3.02109	3.02109	3.02109	3.02109
y2035	IRQ	Developing country	4.8407	4.84049	4.84049	4.84049	4.84049
y2035	YEM	Developing country	3.37853	3.35494	3.35631	3.35506	3.37852
y2035	KWT	Developing country	0.1745	0.1745	0.1745	0.1745	0.1745
y2035	QAT	Developing country	0.00857116	0.00857116	0.00857116	0.00857116	0.00857116
y2035	OMN	Developing country	0.185856	0.179452	0.179481	0.179481	0.185856
y2035	ARE	Developed income	0.153684	0.153684	0.153684	0.151747	0.153684
y2035	PAK	Developing country	103.791	101.598	101.764	101.534	102.749
y2035	CAN	Developed income	62.0459	61.7348	61.9084	61.8967	61.6572
y2035	PRI	Developing country	0.295046	0.210635	0.298427	0.293507	0.201901
y2035	AUS	Developed income	22.3063	21.6769	24.1755	22.2583	21.1845
y2035	JPN	Developing country	31.9926	30.6227	30.9197	31.0323	32.9042
y2035	NZL	Developing country	11.3202	11.3092	11.3153	11.3149	11.2732
y2035	IDN	Developing country	96.1465	97.0826	96.9071	96.9779	96.5815
y2035	MYS	Developing country	17.1159	17.1095	17.0835	17.1182	17.1043
y2035	SGP	Developing country	0.0496046	0.0495833	0.049495	0.0496126	0.0495654
y2035	BRN	Developed income	0.0860267	0.0859896	0.0858365	0.0860404	0.0859586
y2035	PHL	Developing country	28.6331	27.5004	28.0601	27.7444	28.0412
y2035	TLS	Developing country	0.8328	0.8328	0.827053	0.827092	0.8328
y2035	KOR	Developing country	12.9678	11.9063	11.5122	11.97	11.9043
y2035	PNG	Developing country	4.98311	5.99392	5.85218	5.8314	5.51526
y2035	SLB	Developing country	0.0643543	0.0643266	0.064212	0.0643646	0.0643034
y2035	NCL	Developing country	0.12945	0.162086	0.17386	0.170755	0.116046
y2035	VUT	Developing country	0.0396026	0.0395855	0.039515	0.0396089	0.0395712
y2035	FJI	Developing country	0.29089	0.289546	0.290969	0.291533	0.288272
y2035	REU	Developing country	0.007028	0.00701697	0.00703728	0.00618112	0.00700808
y2035	LKA	Developing country	15.0224	20.6705	19.9243	19.7611	17.9985
y2035	BGD	Developing country	53.2454	72.0963	69.7904	68.9861	63.5494
y2035	BTN	Developing country	0.441118	0.42859	0.42672	0.435694	0.427308
y2040	SEN	Developing country	4.31298	4.27742	4.2498	4.25044	4.23098
y2040	GMB	Developing country	0.0924992	0.0924447	0.0895441	0.0925159	0.0924022
y2040	MRT	Developing country	1.14863	1.14737	1.14703	1.17284	1.20194
y2040	ESH	Developing country	3.4e-14	3.4e-14	3.1e-14	3.4e-14	3.1e-14
y2040	GNB	Developing country	0.546579	0.546257	0.542166	0.546678	0.546023
y2040	GIN	Developing country	5.84486	5.84217	5.87583	5.84674	5.83955
y2040	SLE	Developing country	1.65391	1.65355	1.65728	1.65489	1.65269
y2040	MLI	Developing country	6.56968	6.5364	6.59474	6.52124	6.50605
y2040	LBR	Developing country	1.64477	1.6446	1.64632	1.64865	1.64334
y2040	CIV	Developing country	15.157	15.1536	15.2263	15.1678	15.1455
y2040	BFA	Developing country	4.93871	4.91211	4.85188	4.89603	4.87682
y2040	GHA	Developing country	10.2963	10.2937	10.2743	10.302	10.2884
y2040	TGO	Developing country	3.15173	3.15108	3.14858	3.15351	3.14954
y2040	NER	Developing country	18.9808	18.475	18.1929	18.4903	18.5217
y2040	BEN	Developing country	2.61397	2.43381	2.43235	2.43963	2.84968
y2040	DZA	Developing country	3.04336	3.06079	3.0096	3.05586	3.01233
y2040	NGA	Developing country	45.6664	43.6865	43.9408	43.4651	41.5033
y2040	CMR	Developing country	12.6946	12.6788	12.6881	10.9446	12.6656
y2040	GAB	Developing country	2.02393	2.02267	2.02476	2.02578	2.02171
y2040	GNQ	Developing country	0.555358	0.555361	0.556491	0.560789	0.554402
y2040	NAM	Developing country	0.845512	0.891695	0.944942	1.02025	0.824828
y2040	AGO	Developing country	3.44743	3.48279	3.383	3.58526	3.37779
y2040	COG	Developing country	2.4841	2.48303	2.48513	2.48632	2.4816
y2040	COD	Developing country	24.2178	24.1104	24.4263	24.4197	23.7884
y2040	LBY	Developing country	10.5766	10.5593	10.3163	10.6087	10.3375
y2040	TCD	Developing country	4.65473	4.63047	4.62288	6.0614	4.60259
y2040	CAF	Developing country	4.57495	4.57531	4.57343	5.34447	4.5658
y2040	ZAF	Developing country	24.3063	20.5397	24.9983	23.2791	21.3811
y2040	BWA	Developing country	0.500797	0.517197	0.500776	0.523456	0.496831
y2040	ZMB	Developing country	1.44806	1.49389	1.50273	1.52509	1.49858
y2040	SDN	Developing country	30.9386	28.8438	29.2552	28.8732	29.1665
y2040	ZWE	Developing country	3.65295	3.89298	4.15075	4.81707	3.31161
y2040	LSO	Developing country	0.182856	0.182384	0.183094	0.253993	0.182217
y2040	BDI	Developing country	0.870951	0.815841	0.812802	0.867458	0.833143
y2040	RWA	Developing country	0.366853	0.322116	0.319279	0.363918	0.336338
y2040	TZA	Developing country	2.90275	2.64475	2.73138	2.76238	2.75682
y2040	UGA	Developing country	3.03767	2.68653	2.6663	3.01389	2.79941
y2040	MOZ	Developing country	2.26611	3.06054	2.35397	3.37263	2.07292
y2040	SWZ	Developing country	0.0932716	0.0786809	0.0921162	0.085737	0.088598
y2040	MWI	Developing country	0.373822	0.27735	0.308937	0.283838	0.283397
y2040	ETH	Developing country	9.02039	8.69284	8.84568	8.75511	9.33717
y2040	EGY	Developing country	49.5578	49.4254	47.6222	49.4961	47.7722
y2040	KEN	Developing country	4.1122	4.02013	4.0312	4.16325	4.20445
y2040	ERI	Developing country	0.517263	0.515997	0.516827	0.51795	0.51777
y2040	SOM	Developing country	3.94917	3.94683	3.94943	3.94947	3.94619
y2040	DJI	Developing country	0.00288016	0.00287962	0.00288017	0.00297086	0.00307463
y2040	MDG	Developing country	9.35114	8.99872	9.16837	9.23628	8.79612
y2040	MUS	Developing country	0	0	0	0	0
y2040	ATF	Developing country	0	0	0	0	0
y2040	CHN	Developing country	808.483	747.082	759.102	766.707	694.313
y2040	IND	Developing country	1194.47	1218.96	1273.43	1268.36	1173.74
y2040	NPL	Developing country	20.232	26.2417	24.7129	24.4491	24.6111
y2040	MNG	Developing country	1.38235	1.33648	1.39487	1.39234	1.31656
y2040	MMR	Developing country	99.28	94.6364	100.533	97.9226	86.3657
y2040	LAO	Developing country	51.9911	70.432	67.1881	66.7594	64.4785
y2040	THA	Developing country	116.483	97.9182	100.836	97.7501	100.7
y2040	KHM	Developing country	31.3694	29.1429	30.9458	30.1353	27.0844
y2040	VNM	Developing country	86.6062	115.822	109.202	108.368	107.91
y2040	RUS	Developing country	158.01	157.377	157.591	157.874	153.482
y2040	PRK	Developing country	11.8889	9.85672	8.84751	8.23865	10.7954
y2040	GRL	Developed income	1.07215	1.07215	1.07215	1.07215	1.07215
y2040	ISL	Developing country	0.868495	0.867948	0.868279	0.86806	0.867848
y2040	ESP	Developed income	30.3919	30.3162	30.5347	30.4311	30.2902
y2040	IRL	Developing country	0.784309	0.784282	0.784255	0.784181	0.778908
y2040	PRT	Developing country	4.11048	4.11047	4.11048	4.11048	4.10668
y2040	GBR	Developed income	5.05893	4.27969	5.05335	5.05315	4.15265
y2040	FRA	Developed income	24.8163	22.1768	29.4979	26.1055	22.0374
y2040	BEL	Developed income	0.68318	0.683556	0.68214	0.682122	0.659897
y2040	NLD	Developing country	0.666756	0.667079	0.665862	0.665847	0.64706
y2040	NOR	Developing country	3.24029	3.238	3.23987	3.239	3.23976
y2040	LUX	Developing country	0.032878	0.0329006	0.0328157	0.0328146	0.0314856
y2040	DEU	Developed income	8.75865	8.64778	8.96349	8.80423	8.32493
y2040	CHE	Developed income	0.350483	0.349866	0.351018	0.350838	0.354417
y2040	ITA	Developing country	25.5614	25.2492	26.0049	25.6839	25.2734
y2040	DNK	Developed income	1.47054	1.47155	1.46775	1.4677	1.41286
y2040	AUT	Developed income	2.01963	1.22078	2.23494	2.07858	1.20382
y2040	SWE	Developing country	2.45641	3.70327	2.45583	2.45566	3.67991
y2040	CZE	Developed income	2.36661	2.34529	2.40558	2.37432	2.25641
y2040	HRV	Developing country	1.78153	1.54078	2.23655	1.90719	1.53609
y2040	SVN	Developing country	0.301116	0.258249	0.382133	0.323489	0.256983
y2040	SJM	Developing country	0.0711351	0.0711351	0.0711351	0.0711351	0.0711351
y2040	POL	Developing country	10.1142	10.121	10.0953	10.0949	9.71855
y2040	BIH	Developing country	0.932641	0.930378	0.935041	0.934416	0.949965
y2040	HUN	Developing country	6.74871	5.75761	8.62192	7.26625	5.75986
y2040	SVK	Developing country	1.73251	1.33215	1.92272	1.78415	1.30461
y2040	MNE	Developing country	0.181535	0.18109	0.182008	0.181886	0.184914
y2040	SRB	Developing country	3.59628	3.58749	3.60563	3.60321	3.67116
y2040	ALB	Developing country	0.51856	0.517558	0.519644	0.519364	0.526864
y2040	GRC	Developed income	7.6368	7.63678	7.6368	7.6368	7.63806
y2040	MKD	Developing country	0.612527	0.611221	0.613919	0.613559	0.622922
y2040	ROU	Developed income	14.8999	13.2679	17.9307	15.7368	13.2595
y2040	LTU	Developing country	2.10956	2.111	2.10555	2.10549	2.02554
y2040	LVA	Developing country	0.659938	0.660377	0.658718	0.658697	0.632161
y2040	FIN	Developed income	1.79353	2.57835	1.7936	1.79344	2.57591
y2040	EST	Developed income	0.656701	0.6569	0.656095	0.656052	0.64145
y2040	BGR	Developing country	6.61738	6.12593	7.54615	6.87379	6.12208
y2040	BLR	Developing country	2.81203	2.77235	2.78046	2.80355	2.72154
y2040	TUR	Developing country	18.2123	18.2062	18.2187	18.2171	18.2609
y2040	MDA	Developing country	0.995839	0.979512	0.981881	0.992505	0.959435
y2040	CYP	Developed income	0.134396	0.134396	0.134396	0.134396	0.133987
y2040	IRN	Developing country	33.7935	33.7862	33.7896	33.7895	33.7936
y2040	UKR	Developing country	15.6061	15.3522	15.3889	15.5537	15.0389
y2040	GEO	Developing country	0.539246	0.533377	0.53454	0.537852	0.525747
y2040	ARM	Developing country	0.49292	0.491247	0.492565	0.492742	0.346769
y2040	AZE	Developing country	3.53214	3.52058	3.52907	3.53161	1.67277
y2040	KAZ	Developing country	22.1113	22.0308	22.0888	22.0977	17.3147
y2040	TKM	Developing country	8.69174	8.684	8.69055	8.69274	6.06252
y2040	UZB	Developing country	19.0814	19.0508	19.0777	19.0864	8.37533
y2040	AFG	Developing country	9.41716	9.38762	9.35009	9.33402	9.40453
y2040	TJK	Developing country	3.60953	3.5969	3.60449	3.60724	1.61103
y2040	KGZ	Developing country	3.562	3.55353	3.56004	3.56162	1.92331
y2040	MEX	Developing country	144.676	101.668	146.486	146.209	96.4989
y2040	USA	Developed income	286.962	273.106	282.849	282.466	270.729
y2040	GTM	Developing country	7.32492	4.98627	7.42505	6.89807	4.7829
y2040	ECU	Developing country	12.58	10.1148	11.26	12.5949	9.97842
y2040	SLV	Developing country	2.72808	2.00972	2.72084	2.12653	2.11908
y2040	HND	Developing country	6.41856	4.88779	6.43855	6.23089	4.87848
y2040	BLZ	Developing country	0.840393	0.319515	0.889942	0.813402	0.158895
y2040	NIC	Developing country	6.34085	5.47035	6.29475	6.10561	5.30079
y2040	CRI	Developing country	2.61918	2.23112	2.5656	2.60585	1.95945
y2040	CUB	Developing country	9.18504	7.83687	9.00525	9.26551	8.49881
y2040	PAN	Developing country	4.06582	3.9472	3.87341	4.06271	3.41508
y2040	PER	Developing country	23.2381	20.9621	23.325	23.1272	20.2867
y2040	COL	Developing country	38.8585	35.4313	37.3705	38.8234	32.6321
y2040	BHS	Developed income	0.0641919	0.0189973	0.0688115	0.0616796	0.00368177
y2040	JAM	Developing country	0.358851	0.282245	0.360821	0.357595	0.278526
y2040	CHL	Developed income	30.3055	28.0812	29.7441	29.6504	28.2457
y2040	HTI	Developing country	2.41126	2.06759	2.36949	2.17297	2.28479
y2040	BRA	Developing country	186.329	168.683	180.628	186.147	166.978
y2040	ARG	Developing country	41.3833	34.2392	41.6562	41.2791	34.4558
y2040	VEN	Developing country	42.5901	42.6377	42.5926	42.5839	47.862
y2040	DOM	Developing country	4.22403	3.13362	4.19398	4.19108	3.19072
y2040	BOL	Developing country	8.89467	8.22512	8.78307	8.89127	8.19101
y2040	PRY	Developing country	4.22284	4.05337	4.22482	4.20843	3.94431
y2040	TTO	Developing country	1.52606	1.52591	1.526	1.526	1.48388
y2040	FLK	Developing country	9e-15	8e-15	9e-15	9e-15	8e-15
y2040	GUY	Developing country	11.3002	11.3029	11.2299	11.2948	10.8917
y2040	URY	Developed income	8.36334	8.52737	8.25805	8.25728	8.31063
y2040	SUR	Developing country	1.74201	2.13362	1.74195	1.74195	2.07871
y2040	GUF	Developing country	0.195226	0.616042	0.19521	0.19521	0.196091
y2040	SGS	Developing country	1e-15	1e-15	1e-15	1e-15	1e-15
y2040	MAR	Developing country	37.937	37.936	37.9343	37.936	37.9353
y2040	TUN	Developing country	5.55876	5.46975	4.22611	5.51864	4.32661
y2040	SAU	Developing country	7.80923	7.5663	7.67945	7.67659	7.79828
y2040	ISR	Developing country	0.604328	0.604328	0.604328	0.604328	0.604328
y2040	JOR	Developing country	0.310842	0.310842	0.310842	0.310842	0.310842
y2040	LBN	Developing country	0.881138	0.881138	0.881138	0.881717	0.881138
y2040	SYR	Developing country	3.03991	3.03991	3.03991	3.03991	3.03991
y2040	IRQ	Developing country	4.89604	4.89584	4.89584	4.89584	4.89584
y2040	YEM	Developing country	3.47827	3.41467	3.44573	3.44358	3.47798
y2040	KWT	Developing country	0.195434	0.195434	0.195434	0.195434	0.195434
y2040	QAT	Developing country	0.00625675	0.00625675	0.00625675	0.00625675	0.00625675
y2040	OMN	Developing country	0.180005	0.162727	0.170808	0.170578	0.181021
y2040	ARE	Developed income	0.103026	0.103026	0.103026	0.102606	0.103026
y2040	PAK	Developing country	101.796	99.7113	99.2764	98.7802	100.582
y2040	CAN	Developed income	62.6756	62.2736	62.4342	62.4472	62.2439
y2040	PRI	Developing country	0.294283	0.211219	0.297384	0.292495	0.205297
y2040	AUS	Developed income	22.0418	21.9277	36.364	26.4547	20.9027
y2040	JPN	Developing country	31.4427	29.3599	30.9002	31.4223	30.5531
y2040	NZL	Developing country	11.4641	11.4275	11.46	11.456	11.4161
y2040	IDN	Developing country	97.8905	99.0963	98.9928	98.9535	98.7837
y2040	MYS	Developing country	17.2191	17.3273	17.3404	17.3379	17.3158
y2040	SGP	Developing country	0.0500311	0.0503978	0.050442	0.0504335	0.0503587
y2040	BRN	Developed income	0.0870986	0.0877371	0.0878141	0.0877993	0.087669
y2040	PHL	Developing country	28.7183	27.3038	27.4969	27.131	27.4839
y2040	TLS	Developing country	0.861423	0.855532	0.849635	0.849675	0.861423
y2040	KOR	Developing country	12.9537	10.6287	9.60478	8.93497	11.6653
y2040	PNG	Developing country	5.10609	5.99932	5.80452	5.78375	5.76143
y2040	SLB	Developing country	0.0662137	0.0666991	0.0667576	0.0667463	0.0666473
y2040	NCL	Developing country	0.144534	0.166037	0.18165	0.178925	0.131125
y2040	VUT	Developing country	0.040045	0.0403386	0.040374	0.0403672	0.0403073
y2040	FJI	Developing country	0.295737	0.296156	0.298536	0.297372	0.294056
y2040	REU	Developing country	0.00776444	0.00774617	0.00777503	0.00683034	0.00773387
y2040	LKA	Developing country	15.4856	20.5909	19.5754	19.5066	19.1814
y2040	BGD	Developing country	54.3308	71.0402	67.4326	66.955	66.5822
y2040	BTN	Developing country	0.453272	0.406271	0.39305	0.379515	0.423548
y2045	SEN	Developing country	4.33492	4.26386	4.17423	4.34411	4.12813
y2045	GMB	Developing country	0.092371	0.0899051	0.0873891	0.0923828	0.0922343
y2045	MRT	Developing country	1.15009	1.1409	1.58655	1.20106	1.19277
y2045	ESH	Developing country	3.5e-14	3.4e-14	3.4e-14	3.4e-14	3.4e-14
y2045	GNB	Developing country	0.546479	0.536011	0.538945	0.546548	0.545686
y2045	GIN	Developing country	6.03289	5.97471	6.08332	6.03461	6.01611
y2045	SLE	Developing country	1.80989	1.80712	1.81484	1.8109	1.80067
y2045	MLI	Developing country	6.59857	6.50837	6.57531	6.56636	6.42764
y2045	LBR	Developing country	1.79156	1.791	1.79329	1.79697	1.7822
y2045	CIV	Developing country	16.4542	16.4331	16.5643	16.4663	16.3727
y2045	BFA	Developing country	4.95424	4.84094	4.7497	4.90454	4.81145
y2045	GHA	Developing country	11.1196	11.0749	11.0783	11.1254	11.0664
y2045	TGO	Developing country	3.40591	3.40135	3.39932	3.40773	3.39292
y2045	NER	Developing country	18.514	18.2971	17.0712	18.3569	18.1889
y2045	BEN	Developing country	2.75592	2.56137	2.56326	2.57603	2.9874
y2045	DZA	Developing country	3.03615	2.96276	2.9418	2.96411	2.93794
y2045	NGA	Developing country	47.5138	44.3985	45.2382	45.2732	43.1202
y2045	CMR	Developing country	13.0092	12.9871	12.9742	11.2552	12.9272
y2045	GAB	Developing country	2.00659	2.00458	2.00731	2.00891	2.00243
y2045	GNQ	Developing country	0.549164	0.549062	0.550603	0.557303	0.547689
y2045	NAM	Developing country	1.9461	2.60879	2.59828	2.60724	1.93424
y2045	AGO	Developing country	4.19836	5.89775	5.94168	6.05414	4.17094
y2045	COG	Developing country	2.48078	2.47886	2.48171	2.48357	2.47521
y2045	COD	Developing country	24.3636	24.3251	24.5907	24.6528	23.9924
y2045	LBY	Developing country	10.4135	10.3933	10.3726	10.4636	10.3953
y2045	TCD	Developing country	4.68571	4.65047	4.58917	6.11333	4.55721
y2045	CAF	Developing country	4.47014	4.47505	4.47228	5.24408	4.46145
y2045	ZAF	Developing country	38.7317	36.2667	38.0494	38.0917	36.3367
y2045	BWA	Developing country	2.27931	2.29946	2.29933	2.30637	2.28033
y2045	ZMB	Developing country	1.59095	1.63579	1.67029	1.67066	1.65078
y2045	SDN	Developing country	38.8161	28.514	29.3757	33.4938	29.4997
y2045	ZWE	Developing country	6.54269	7.35771	7.81843	7.81921	6.32226
y2045	LSO	Developing country	0.20599	0.205649	0.206081	0.286581	0.204775
y2045	BDI	Developing country	0.914484	0.918475	0.89715	0.947736	0.901655
y2045	RWA	Developing country	0.405541	0.409206	0.391367	0.432596	0.395775
y2045	TZA	Developing country	3.28121	3.18229	3.57645	4.10862	3.25978
y2045	UGA	Developing country	3.36083	3.38593	3.32876	3.75579	3.28365
y2045	MOZ	Developing country	2.57614	3.4874	3.74451	3.75055	2.43769
y2045	SWZ	Developing country	0.0935418	0.0819519	0.089	0.0889944	0.0914422
y2045	MWI	Developing country	0.403404	0.301196	0.308486	0.308464	0.290398
y2045	ETH	Developing country	11.0798	10.8212	10.996	11.3235	11.3144
y2045	EGY	Developing country	48.623	48.4743	48.3143	48.5663	48.4855
y2045	KEN	Developing country	4.63068	4.67475	8.38583	13.5313	4.71139
y2045	ERI	Developing country	0.55113	0.548827	1.47729	2.71339	0.548676
y2045	SOM	Developing country	21.7413	21.7407	22.5108	23.5329	21.7399
y2045	DJI	Developing country	0.00270881	0.00268426	0.00270874	0.00278861	0.00287163
y2045	MDG	Developing country	9.7719	9.40731	9.76705	9.93072	9.06828
y2045	MUS	Developing country	0	0	0	0	0
y2045	ATF	Developing country	0	0	0	0	0
y2045	CHN	Developing country	810.91	722.636	739.417	769.606	641.071
y2045	IND	Developing country	1164.4	1203.13	1248.06	1235.91	1139.93
y2045	NPL	Developing country	21.4074	25.8341	24.4619	24.4278	25.5424
y2045	MNG	Developing country	1.4064	1.34438	1.40908	1.41575	1.33152
y2045	MMR	Developing country	100.33	93.6035	101.718	97.957	85.4458
y2045	LAO	Developing country	55.679	69.851	67.295	67.9425	67.5779
y2045	THA	Developing country	117.672	94.329	96.6232	94.0882	99.7922
y2045	KHM	Developing country	31.6674	28.6651	31.0154	29.9504	26.7311
y2045	VNM	Developing country	92.5436	114.451	108.525	109.006	113.006
y2045	RUS	Developing country	157.954	157.37	157.201	157.126	153.245
y2045	PRK	Developing country	11.6808	9.58032	8.5406	7.70832	10.5236
y2045	GRL	Developed income	1.06641	1.06641	1.06641	1.06641	1.06641
y2045	ISL	Developing country	0.859083	0.858875	0.859005	0.859005	0.858759
y2045	ESP	Developed income	29.4999	29.4223	29.64	29.5383	29.2707
y2045	IRL	Developing country	0.776002	0.774936	0.775719	0.77572	0.772356
y2045	PRT	Developing country	3.94487	3.94486	3.94487	3.94487	3.93119
y2045	GBR	Developed income	4.98787	4.14763	4.98166	4.98164	4.18909
y2045	FRA	Developed income	24.3346	21.6904	28.9238	25.5965	21.0778
y2045	BEL	Developed income	0.669417	0.660281	0.668318	0.668315	0.667667
y2045	NLD	Developing country	0.653277	0.645436	0.652334	0.652332	0.652136
y2045	NOR	Developing country	3.20752	3.20659	3.20756	3.20752	3.20458
y2045	LUX	Developing country	0.0322221	0.0316738	0.0321562	0.032156	0.0321237
y2045	DEU	Developed income	8.56827	8.32395	8.76779	8.61192	8.41545
y2045	CHE	Developed income	0.350067	0.349744	0.350572	0.350496	0.348324
y2045	ITA	Developing country	25.0551	24.7514	25.4893	25.1748	24.6842
y2045	DNK	Developed income	1.4293	1.40498	1.42638	1.42637	1.42959
y2045	AUT	Developed income	1.99871	1.19326	2.20984	2.05641	1.16776
y2045	SWE	Developing country	2.43826	3.68345	2.43717	2.43717	3.67956
y2045	CZE	Developed income	2.31682	2.25822	2.35469	2.3241	2.28688
y2045	HRV	Developing country	1.74822	1.51117	2.19486	1.87141	1.44605
y2045	SVN	Developing country	0.295723	0.25345	0.375335	0.317679	0.24149
y2045	SJM	Developing country	0.0702115	0.0702114	0.0702115	0.0702115	0.0702115
y2045	POL	Developing country	9.90352	9.73743	9.88353	9.88347	9.90075
y2045	BIH	Developing country	0.93838	0.937141	0.940568	0.940245	0.931484
y2045	HUN	Developing country	6.61242	5.64014	8.44957	7.11937	5.38473
y2045	SVK	Developing country	1.70659	1.29494	1.89294	1.75706	1.27767
y2045	MNE	Developing country	0.182733	0.182489	0.183165	0.183101	0.181336
y2045	SRB	Developing country	3.61632	3.61151	3.62484	3.62358	3.59677
y2045	ALB	Developing country	0.519735	0.519194	0.520721	0.520576	0.517107
y2045	GRC	Developed income	7.4722	7.47218	7.4722	7.4722	7.45519
y2045	MKD	Developing country	0.614215	0.613499	0.615483	0.615296	0.610568
y2045	ROU	Developed income	14.6304	13.0214	17.6038	15.4503	12.6159
y2045	LTU	Developing country	2.06586	2.03071	2.06163	2.06162	2.06498
y2045	LVA	Developing country	0.648461	0.637706	0.647165	0.647161	0.645962
y2045	FIN	Developed income	1.77132	2.56081	1.77088	1.77088	2.56102
y2045	EST	Developed income	0.647504	0.6419	0.646761	0.64676	0.645262
y2045	BGR	Developing country	6.50649	6.02185	7.4176	6.75769	5.89801
y2045	BLR	Developing country	2.78969	2.75275	2.73115	2.72662	2.67257
y2045	TUR	Developing country	18.0068	18.0034	18.0126	18.0118	17.9904
y2045	MDA	Developing country	0.98584	0.970707	0.959718	0.958298	0.935539
y2045	CYP	Developed income	0.128676	0.128676	0.128676	0.128676	0.126941
y2045	IRN	Developing country	33.3866	33.3733	33.3782	33.3795	33.3839
y2045	UKR	Developing country	15.4483	15.213	15.0425	15.0202	14.6663
y2045	GEO	Developing country	0.536688	0.531218	0.528105	0.527418	0.519465
y2045	ARM	Developing country	0.488953	0.487953	0.48878	0.489475	0.34486
y2045	AZE	Developing country	3.47322	3.47116	3.47538	3.4817	1.64808
y2045	KAZ	Developing country	21.876	21.8108	21.8338	21.8759	17.101
y2045	TKM	Developing country	8.58384	8.54106	8.59434	8.60121	6.01016
y2045	UZB	Developing country	18.7112	18.6988	18.7548	18.7827	8.2582
y2045	AFG	Developing country	9.42743	9.39527	9.23344	9.33701	9.39461
y2045	TJK	Developing country	3.55266	3.5472	3.55606	3.56262	1.59154
y2045	KGZ	Developing country	3.50509	3.50508	3.50905	3.51447	1.9028
y2045	MEX	Developing country	146.202	101.07	148.314	139.652	93.541
y2045	USA	Developed income	282.067	269.132	277.265	276.063	267.301
y2045	GTM	Developing country	7.39801	4.99477	7.6402	6.62075	4.54051
y2045	ECU	Developing country	12.7346	10.0959	12.7713	12.6971	9.91445
y2045	SLV	Developing country	2.8831	2.02435	3.09304	1.83942	2.09658
y2045	HND	Developing country	6.57992	4.91235	6.80934	5.88412	4.65791
y2045	BLZ	Developing country	0.831788	0.318961	0.877448	0.802807	0.153687
y2045	NIC	Developing country	6.45909	5.48885	6.62336	5.8629	5.17422
y2045	CRI	Developing country	2.60378	2.27255	2.62385	2.58796	1.79795
y2045	CUB	Developing country	9.08051	7.81196	8.88943	9.10777	8.18452
y2045	PAN	Developing country	4.05016	4.05654	4.05399	4.04613	3.06552
y2045	PER	Developing country	23.3076	20.3507	23.318	22.893	20.0632
y2045	COL	Developing country	39.5311	36.1865	39.4287	39.0487	30.9648
y2045	BHS	Developed income	0.0635525	0.0189863	0.0678625	0.0608937	0.00360848
y2045	JAM	Developing country	0.358071	0.283991	0.35902	0.356048	0.273254
y2045	CHL	Developed income	29.3863	27.3054	28.9386	28.7087	27.2017
y2045	HTI	Developing country	2.45585	2.06557	2.49777	2.03733	2.21918
y2045	BRA	Developing country	226.128	171.863	212.417	204.188	169.784
y2045	ARG	Developing country	78.162	34.2029	62.2334	44.4734	33.7406
y2045	VEN	Developing country	42.8839	42.9712	42.8812	69.889	47.9055
y2045	DOM	Developing country	4.19536	3.12237	4.19914	4.05765	3.07546
y2045	BOL	Developing country	8.97743	8.4173	8.88751	8.79206	8.08014
y2045	PRY	Developing country	4.66603	4.16581	4.49945	4.30763	3.83698
y2045	TTO	Developing country	1.54152	1.54139	1.54145	1.71266	1.50355
y2045	FLK	Developing country	9e-15	8e-15	9e-15	9e-15	8e-15
y2045	GUY	Developing country	11.4371	11.4256	11.345	12.2011	11.024
y2045	URY	Developed income	32.6775	8.45962	21.7728	9.02795	8.24266
y2045	SUR	Developing country	1.77184	2.1721	1.77177	1.77174	2.11935
y2045	GUF	Developing country	0.199315	0.629453	0.199297	0.199288	0.621905
y2045	SGS	Developing country	1e-15	0	1e-15	1e-15	0
y2045	MAR	Developing country	37.5501	37.5491	37.5472	37.5492	37.5491
y2045	TUN	Developing country	5.43169	5.32826	5.22256	5.39172	5.33926
y2045	SAU	Developing country	6.69354	6.29043	6.47804	6.47743	6.60986
y2045	ISR	Developing country	0.586142	0.586142	0.586142	0.586142	0.586142
y2045	JOR	Developing country	0.303379	0.303379	0.303379	0.303379	0.303379
y2045	LBN	Developing country	0.830232	0.830232	0.830063	0.83064	0.830232
y2045	SYR	Developing country	3.09554	3.09554	3.09469	3.09554	3.09554
y2045	IRQ	Developing country	4.93864	4.93845	4.93698	4.93845	4.93845
y2045	YEM	Developing country	3.67907	3.5747	3.62453	3.62315	3.65742
y2045	KWT	Developing country	0.138934	0.138934	0.138934	0.138934	0.138934
y2045	QAT	Developing country	0.00460689	0.00460689	0.00460689	0.00460689	0.00460689
y2045	OMN	Developing country	0.176432	0.147872	0.161126	0.161126	0.170517
y2045	ARE	Developed income	0.0727832	0.0727832	0.0727832	0.0725201	0.0727832
y2045	PAK	Developing country	100.799	97.8804	97.1134	96.8524	99.1994
y2045	CAN	Developed income	63.317	62.8979	74.1401	63.0134	62.8732
y2045	PRI	Developing country	0.293851	0.212591	0.295946	0.291317	0.200468
y2045	AUS	Developed income	21.9412	21.3884	36.782	31.5016	20.8873
y2045	JPN	Developing country	31.1857	30.8227	31.811	31.8889	30.2661
y2045	NZL	Developing country	11.617	11.5804	11.5413	11.6101	11.5796
y2045	IDN	Developing country	101.037	102.048	101.984	101.969	101.936
y2045	MYS	Developing country	17.4345	17.5542	17.5711	17.5668	17.5451
y2045	SGP	Developing country	0.0508023	0.0512084	0.0512656	0.0512508	0.0511773
y2045	BRN	Developed income	0.0887399	0.0894494	0.0895493	0.0895235	0.089395
y2045	PHL	Developing country	29.1221	27.0093	27.1349	26.8578	27.648
y2045	TLS	Developing country	0.907953	0.901753	0.895546	0.901372	0.91374
y2045	KOR	Developing country	12.7297	10.3333	9.26965	8.35382	11.4634
y2045	PNG	Developing country	5.3347	6.01466	5.84035	5.88585	5.97396
y2045	SLB	Developing country	0.0684544	0.0690017	0.0690788	0.0690589	0.0689598
y2045	NCL	Developing country	0.147568	0.170512	0.194981	0.18745	0.130916
y2045	VUT	Developing country	0.0407565	0.0410823	0.0411282	0.0411164	0.0410574
y2045	FJI	Developing country	0.302564	0.302963	0.304075	0.304216	0.301375
y2045	REU	Developing country	0.00856868	0.00860047	0.00857652	0.00753567	0.00851152
y2045	LKA	Developing country	16.6025	20.5176	19.6218	19.7788	20.1586
y2045	BGD	Developing country	57.898	69.8139	66.472	66.4264	69.4728
y2045	BTN	Developing country	0.450158	0.402002	0.386958	0.370197	0.424417
y2050	SEN	Developing country	22.1268	11.4435	25.0627	11.5951	15.9625
y2050	GMB	Developing country	0.0921236	0.0690094	0.0871449	0.0908005	0.0919336
y2050	MRT	Developing country	4.7872	4.38199	4.87655	4.31696	4.50245
y2050	ESH	Developing country	3.4e-14	3.4e-14	3.4e-14	3.5e-14	3.3e-14
y2050	GNB	Developing country	0.545677	0.440183	0.538078	0.53784	0.544569
y2050	GIN	Developing country	6.16244	5.54252	6.20116	6.11445	6.15138
y2050	SLE	Developing country	1.92298	1.90448	1.91892	1.92845	1.92021
y2050	MLI	Developing country	18.8347	9.44472	21.4424	9.88039	13.6148
y2050	LBR	Developing country	1.89497	1.90116	1.88845	1.90177	1.90782
y2050	CIV	Developing country	17.3671	17.2016	17.3994	17.4053	17.3533
y2050	BFA	Developing country	11.676	4.13676	13.4926	4.85072	7.70263
y2050	GHA	Developing country	11.7983	11.4221	11.7069	11.8146	11.7808
y2050	TGO	Developing country	3.50432	3.55466	3.5529	3.58627	3.57192
y2050	NER	Developing country	99.6974	70.9807	107.67	70.6936	82.6377
y2050	BEN	Developing country	3.04298	2.58277	2.94888	2.66544	3.19387
y2050	DZA	Developing country	2.94414	2.86759	2.96916	2.87858	2.85443
y2050	NGA	Developing country	91.3068	49.8617	108.408	51.9344	70.8177
y2050	CMR	Developing country	15.9653	13.1177	34.2397	21.6367	21.202
y2050	GAB	Developing country	1.97891	1.97571	1.97977	1.97878	1.98062
y2050	GNQ	Developing country	0.539846	0.540096	0.542199	0.538123	0.567039
y2050	NAM	Developing country	2.34671	2.6219	2.56782	2.57358	2.26316
y2050	AGO	Developing country	6.02737	6.00792	6.07716	6.10743	5.95771
y2050	COG	Developing country	2.45936	2.45706	2.45929	2.46023	2.46153
y2050	COD	Developing country	26.3587	26.377	26.7123	26.6875	26.737
y2050	LBY	Developing country	10.1453	10.17	10.2529	10.2422	10.2037
y2050	TCD	Developing country	11.6585	4.90793	30.1848	32.2683	14.2601
y2050	CAF	Developing country	4.41567	4.31984	7.73631	12.7312	5.64786
y2050	ZAF	Developing country	46.9317	44.6402	44.6643	44.6284	46.3512
y2050	BWA	Developing country	2.25428	2.25356	2.25438	2.26089	2.25438
y2050	ZMB	Developing country	2.35134	2.38231	2.40475	2.40873	2.43296
y2050	SDN	Developing country	40.9075	39.7401	40.6346	39.0805	40.604
y2050	ZWE	Developing country	7.35161	8.07376	8.07625	8.07656	6.75711
y2050	LSO	Developing country	0.989195	0.956192	0.989214	1.07746	0.98878
y2050	BDI	Developing country	0.981504	0.983448	0.975293	1.01574	0.977559
y2050	RWA	Developing country	0.464899	0.467128	0.459821	0.492718	0.462556
y2050	TZA	Developing country	9.06555	8.84658	8.8982	8.93715	8.99268
y2050	UGA	Developing country	4.87615	4.85301	4.83512	5.09156	4.85778
y2050	MOZ	Developing country	2.97942	4.13231	4.14989	4.15644	2.84454
y2050	SWZ	Developing country	0.107661	0.099613	0.0999191	0.0994792	0.107267
y2050	MWI	Developing country	0.399756	0.342407	0.347266	0.327518	0.32911
y2050	ETH	Developing country	15.8772	15.4361	15.4945	15.3066	15.719
y2050	EGY	Developing country	46.9399	47.125	47.3123	47.238	47.3723
y2050	KEN	Developing country	17.7799	17.613	17.6801	17.6932	17.785
y2050	ERI	Developing country	3.8019	3.61931	3.84183	3.65271	3.71293
y2050	SOM	Developing country	23.9281	23.9253	23.9281	23.9281	19.32
y2050	DJI	Developing country	0.00853468	0.00826258	0.00853451	0.00805962	0.00822768
y2050	MDG	Developing country	10.1494	9.96348	9.55213	10.2778	9.98202
y2050	MUS	Developing country	0	0	0	0	0
y2050	ATF	Developing country	0	0	0	0	0
y2050	CHN	Developing country	805.149	681.957	703.366	723.888	633.595
y2050	IND	Developing country	1138.49	1172.7	1202.87	1195.27	1117.14
y2050	NPL	Developing country	21.7255	26.9057	24.55	24.9414	26.6363
y2050	MNG	Developing country	1.41823	1.35329	1.41853	1.42101	1.33454
y2050	MMR	Developing country	100.845	91.5818	100.142	95.5086	82.5755
y2050	LAO	Developing country	57.3087	76.0947	69.0906	71.7991	73.0478
y2050	THA	Developing country	113.25	92.5668	92.6773	90.8202	97.5899
y2050	KHM	Developing country	31.5338	28.0331	30.3779	29.1214	25.982
y2050	VNM	Developing country	94.5431	120.816	109.737	112.48	120.066
y2050	RUS	Developing country	157.935	154.068	157.73	157.18	152.916
y2050	PRK	Developing country	11.3634	9.1919	8.21547	7.39069	8.23424
y2050	GRL	Developed income	1.06267	1.06267	1.06267	1.06267	1.06267
y2050	ISL	Developing country	0.85611	0.855988	0.856135	0.856134	0.855859
y2050	ESP	Developed income	28.6603	28.5832	28.7984	28.6981	26.0645
y2050	IRL	Developing country	0.776479	0.773598	0.776364	0.776355	0.773292
y2050	PRT	Developing country	3.79357	3.79357	3.79357	3.79357	3.66421
y2050	GBR	Developed income	4.94891	4.09239	4.94335	4.94266	4.14258
y2050	FRA	Developed income	23.9348	21.3221	28.448	25.1735	20.1429
y2050	BEL	Developed income	0.659441	0.649233	0.658418	0.658289	0.640265
y2050	NLD	Developing country	0.642894	0.634166	0.642017	0.641906	0.614632
y2050	NOR	Developing country	3.19795	3.19725	3.19832	3.19832	3.19453
y2050	LUX	Developing country	0.0317916	0.0311799	0.0317301	0.0317224	0.0316939
y2050	DEU	Developed income	8.43924	8.1816	8.63611	8.48107	8.29063
y2050	CHE	Developed income	0.350937	0.350496	0.351391	0.351387	0.348025
y2050	ITA	Developing country	24.5507	24.255	24.9772	24.6682	21.3066
y2050	DNK	Developed income	1.39902	1.3721	1.39631	1.39597	1.39927
y2050	AUT	Developed income	1.98318	1.17721	2.19097	2.03983	1.15499
y2050	SWE	Developing country	2.43998	3.68375	2.43927	2.43919	3.68522
y2050	CZE	Developed income	2.28338	2.2209	2.32083	2.29025	2.25425
y2050	HRV	Developing country	1.72115	1.48735	2.16093	1.84226	1.41258
y2050	SVN	Developing country	0.29147	0.24972	0.369944	0.313078	0.238634
y2050	SJM	Developing country	0.0695282	0.0695282	0.0695282	0.0695282	0.0695282
y2050	POL	Developing country	9.7664	9.58089	9.74779	9.74545	9.76352
y2050	BIH	Developing country	0.945521	0.943726	0.94743	0.947414	0.933612
y2050	HUN	Developing country	6.50152	5.54374	8.30885	6.99948	5.30809
y2050	SVK	Developing country	1.68821	1.27504	1.87153	1.73769	1.26129
y2050	MNE	Developing country	0.184192	0.183838	0.184568	0.184565	0.181805
y2050	SRB	Developing country	3.64146	3.63449	3.64888	3.64882	3.60245
y2050	ALB	Developing country	0.521311	0.520521	0.52217	0.522163	0.501082
y2050	GRC	Developed income	7.3098	7.30978	7.3098	7.3098	6.44592
y2050	MKD	Developing country	0.616565	0.615526	0.61767	0.61766	0.610019
y2050	ROU	Developed income	14.4028	12.8149	17.3291	15.2085	11.9698
y2050	LTU	Developing country	2.03705	1.99786	2.03311	2.03262	2.03614
y2050	LVA	Developing country	0.641519	0.629449	0.64031	0.640158	0.639045
y2050	FIN	Developed income	1.76805	2.55819	1.76798	1.76798	2.56302
y2050	EST	Developed income	0.644293	0.637297	0.643665	0.643588	0.642265
y2050	BGR	Developing country	6.40718	5.92906	7.30381	6.654	5.39411
y2050	BLR	Developing country	2.76428	2.71678	2.74886	2.70607	2.6976
y2050	TUR	Developing country	17.7801	17.7753	17.7852	17.7852	16.1387
y2050	MDA	Developing country	0.974028	0.957032	0.967531	0.948668	0.947648
y2050	CYP	Developed income	0.123462	0.123462	0.123462	0.123462	0.116724
y2050	IRN	Developing country	33.075	33.0582	33.0634	33.0829	33.0686
y2050	UKR	Developing country	15.2634	14.9984	15.162	14.8693	14.8522
y2050	GEO	Developing country	0.533883	0.526741	0.531508	0.525325	0.523864
y2050	ARM	Developing country	0.484622	0.357437	0.485047	0.485541	0.30891
y2050	AZE	Developing country	3.41216	2.1227	3.42424	3.43074	1.46707
y2050	KAZ	Developing country	21.5902	15.1362	21.5605	21.5684	13.824
y2050	TKM	Developing country	8.44362	6.51937	8.46724	8.47932	5.93749
y2050	UZB	Developing country	18.3195	11.73	18.4162	18.4651	8.14828
y2050	AFG	Developing country	9.39939	9.36703	9.04985	9.2065	9.3233
y2050	TJK	Developing country	3.49366	2.24181	3.50702	3.51677	1.53869
y2050	KGZ	Developing country	3.44817	2.36467	3.45998	3.46711	1.78351
y2050	MEX	Developing country	151.422	100.217	145.94	139.494	90.0798
y2050	USA	Developed income	274.514	264.497	272.611	272.468	259.729
y2050	GTM	Developing country	7.61693	4.98274	7.65304	6.66944	4.5147
y2050	ECU	Developing country	12.9253	10.1827	12.6702	12.8395	9.91368
y2050	SLV	Developing country	3.26225	2.03173	3.16434	1.95952	2.07651
y2050	HND	Developing country	6.9523	4.94947	6.89619	5.99741	4.66548
y2050	BLZ	Developing country	0.82101	0.315646	0.867839	0.794571	0.152439
y2050	NIC	Developing country	6.74913	5.42351	6.68818	5.81743	5.14245
y2050	CRI	Developing country	2.58241	2.08529	2.60483	2.5569	1.74246
y2050	CUB	Developing country	8.95569	7.72487	8.76309	8.98701	8.08997
y2050	PAN	Developing country	4.0258	3.59109	4.0298	3.9939	2.93237
y2050	PER	Developing country	25.163	20.4225	22.6202	22.4827	19.6231
y2050	COL	Developing country	40.3186	34.2995	39.9068	39.3779	30.6193
y2050	BHS	Developed income	0.0627463	0.018811	0.0671362	0.0602865	0.0036264
y2050	JAM	Developing country	0.357607	0.284908	0.359078	0.356354	0.270094
y2050	CHL	Developed income	29.048	26.2707	27.8848	27.663	25.9892
y2050	HTI	Developing country	2.58767	2.04991	2.50836	2.06712	2.19006
y2050	BRA	Developing country	266.042	176.694	238.663	220.99	172.213
y2050	ARG	Developing country	137.771	34.7336	89.1014	74.4698	33.6018
y2050	VEN	Developing country	71.6501	43.5984	43.1326	71.6416	48.0411
y2050	DOM	Developing country	4.19323	3.08959	4.14224	4.01583	3.03869
y2050	BOL	Developing country	9.77391	8.5582	8.96215	9.24008	7.99697
y2050	PRY	Developing country	5.32186	4.32419	4.89681	4.64066	3.85228
y2050	TTO	Developing country	1.7386	1.55979	1.55784	1.73853	1.5248
y2050	FLK	Developing country	9e-15	8e-15	8e-15	8e-15	8e-15
y2050	GUY	Developing country	12.3926	11.5671	11.4765	12.3744	11.1135
y2050	URY	Developed income	67.3122	8.44834	30.1052	21.655	8.32958
y2050	SUR	Developing country	1.80534	2.21508	1.80526	1.80528	2.16279
y2050	GUF	Developing country	0.203918	0.644467	0.203898	0.203902	0.635684
y2050	SGS	Developing country	1e-15	0	1e-15	1e-15	0
y2050	MAR	Developing country	36.9552	36.9544	36.9525	36.9544	36.9544
y2050	TUN	Developing country	4.95555	5.08232	5.21613	5.1602	5.25601
y2050	SAU	Developing country	6.22108	5.75236	5.93471	6.43884	6.02502
y2050	ISR	Developing country	0.552941	0.552941	0.552941	0.552941	0.552941
y2050	JOR	Developing country	0.288913	0.288913	0.288913	0.288913	0.288913
y2050	LBN	Developing country	0.927028	0.927028	0.926861	0.927418	0.927028
y2050	SYR	Developing country	3.01645	3.01645	3.01557	3.01645	3.01645
y2050	IRQ	Developing country	4.9023	4.90212	4.9006	4.90212	4.90212
y2050	YEM	Developing country	3.96577	3.84466	3.89317	4.02208	3.91866
y2050	KWT	Developing country	0.110047	0.110047	0.110047	0.110047	0.110047
y2050	QAT	Developing country	0.00316909	0.00316909	0.00316909	0.00316909	0.00316909
y2050	OMN	Developing country	0.176805	0.143695	0.156544	0.1922	0.164896
y2050	ARE	Developed income	0.0649052	0.0649052	0.0649052	0.0646785	0.0649052
y2050	PAK	Developing country	98.9619	96.5104	95.2159	95.1633	97.5097
y2050	CAN	Developed income	63.5091	63.3835	74.7366	63.4666	63.3538
y2050	PRI	Developing country	0.293046	0.212658	0.295679	0.291238	0.19916
y2050	AUS	Developed income	21.8397	20.921	36.7889	33.8617	20.9243
y2050	JPN	Developing country	30.6788	31.9564	32.6112	32.6795	30.5571
y2050	NZL	Developing country	11.7597	11.7341	11.5419	11.762	11.7332
y2050	IDN	Developing country	105.14	105.587	105.4	105.439	105.483
y2050	MYS	Developing country	17.7843	17.713	17.7328	17.7287	17.6826
y2050	SGP	Developing country	0.0520191	0.0517772	0.0518446	0.0518305	0.0516741
y2050	BRN	Developed income	0.0911712	0.0907472	0.0908653	0.0908407	0.0905664
y2050	PHL	Developing country	28.9004	26.9582	26.7662	26.5946	27.6229
y2050	TLS	Developing country	0.9698	0.969346	0.962698	0.968929	0.982123
y2050	KOR	Developing country	12.3858	9.91545	8.91527	8.00821	8.94774
y2050	PNG	Developing country	5.46568	6.4048	5.98457	6.14884	6.29203
y2050	SLB	Developing country	0.0713479	0.0710161	0.0711086	0.0710893	0.0708746
y2050	NCL	Developing country	0.159296	0.167768	0.198018	0.186048	0.128649
y2050	VUT	Developing country	0.0418298	0.0416352	0.0416895	0.0416781	0.0415523
y2050	FJI	Developing country	0.310053	0.308619	0.309815	0.310102	0.305934
y2050	REU	Developing country	0.00914581	0.0092358	0.00914891	0.0080398	0.00907812
y2050	LKA	Developing country	17.129	21.6761	19.9799	20.48	21.6788
y2050	BGD	Developing country	58.5752	70.0809	65.5794	65.7881	73.1932
y2050	BTN	Developing country	0.444737	0.394861	0.381078	0.364626	0.377562
y2055	SEN	Developing country	22.8914	10.8175	25.7889	13.592	15.7543
y2055	GMB	Developing country	0.0895893	0.0697824	0.0875231	0.0762463	0.0923161
y2055	MRT	Developing country	4.77274	4.31322	4.86085	4.34309	4.38705
y2055	ESH	Developing country	3.5e-14	3.5e-14	3.4e-14	3.6e-14	3.4e-14
y2055	GNB	Developing country	0.544106	0.445485	0.540879	0.455914	0.547308
y2055	GIN	Developing country	6.36367	5.71038	6.37	5.67503	6.31886
y2055	SLE	Developing country	2.05223	2.01308	2.04322	2.02544	2.04416
y2055	MLI	Developing country	19.7648	9.11924	22.2678	11.323	13.624
y2055	LBR	Developing country	2.00962	1.99554	2.0046	2.01645	2.01991
y2055	CIV	Developing country	18.4738	18.0928	18.4274	18.1185	18.3748
y2055	BFA	Developing country	12.4064	4.02829	14.2441	5.94536	7.85638
y2055	GHA	Developing country	12.4358	11.9702	12.3575	12.1512	12.4294
y2055	TGO	Developing country	3.6675	3.7115	3.72853	3.74588	3.74944
y2055	NER	Developing country	99.9895	67.4542	107.837	74.7033	80.0297
y2055	BEN	Developing country	3.1902	2.66644	3.06724	2.75552	3.30601
y2055	DZA	Developing country	2.95254	2.86526	2.96344	2.9716	2.85988
y2055	NGA	Developing country	98.4902	49.4092	113.329	64.1593	72.0931
y2055	CMR	Developing country	24.1402	13.1049	34.2342	29.3133	21.2126
y2055	GAB	Developing country	1.93383	1.92832	1.93589	1.93486	1.93496
y2055	GNQ	Developing country	0.52654	0.52375	0.536162	0.531958	0.554187
y2055	NAM	Developing country	2.28201	2.49375	2.54275	2.53633	2.19781
y2055	AGO	Developing country	6.09938	5.90328	6.28276	9.50962	5.93156
y2055	COG	Developing country	2.41938	2.41202	2.42188	2.42112	2.42056
y2055	COD	Developing country	26.3891	26.4169	26.8283	26.8282	26.6381
y2055	LBY	Developing country	10.0081	10.0152	9.99156	10.0749	10.025
y2055	TCD	Developing country	19.7967	4.73773	30.5537	51.5473	14.2465
y2055	CAF	Developing country	5.69447	4.12325	7.49729	17.7638	5.42641
y2055	ZAF	Developing country	43.4442	43.0959	43.2787	42.9337	43.1544
y2055	BWA	Developing country	2.19916	2.19548	2.21486	2.20561	2.19907
y2055	ZMB	Developing country	2.73876	2.76781	2.77839	3.02841	2.76677
y2055	SDN	Developing country	43.785	39.7127	40.7425	40.5378	40.414
y2055	ZWE	Developing country	7.8488	7.87033	7.86843	7.9617	7.18367
y2055	LSO	Developing country	0.991641	0.820791	0.991627	1.08565	0.99115
y2055	BDI	Developing country	1.08784	1.08052	1.03643	1.07951	1.03241
y2055	RWA	Developing country	0.558821	0.553819	0.517129	0.552135	0.514778
y2055	TZA	Developing country	9.29151	8.88492	9.11494	9.76413	9.16645
y2055	UGA	Developing country	5.60592	5.3729	5.27929	5.55206	5.26247
y2055	MOZ	Developing country	4.34224	4.37818	4.39137	4.68572	4.02588
y2055	SWZ	Developing country	0.102621	0.10081	0.101472	0.100608	0.102743
y2055	MWI	Developing country	0.407484	0.337227	0.354589	0.51286	0.346487
y2055	ETH	Developing country	16.5291	15.256	16.0672	15.9855	16.5061
y2055	EGY	Developing country	46.2243	46.2797	45.7066	46.3362	46.349
y2055	KEN	Developing country	17.9567	16.9244	17.772	17.8002	17.9355
y2055	ERI	Developing country	3.80029	3.45085	3.83962	3.67037	3.69503
y2055	SOM	Developing country	23.3471	23.3352	23.347	23.347	23.3456
y2055	DJI	Developing country	0.00810026	0.00780596	0.0081	0.00763851	0.00759197
y2055	MDG	Developing country	9.81026	10.1066	9.85431	10.4869	10.2879
y2055	MUS	Developing country	0	0	0	0	0
y2055	ATF	Developing country	0	0	0	0	0
y2055	CHN	Developing country	789.322	646.675	683.688	701.347	611.866
y2055	IND	Developing country	1115.47	1150.54	1156.84	1157.13	1092.88
y2055	NPL	Developing country	21.8004	26.485	24.6955	24.8021	26.3301
y2055	MNG	Developing country	1.42255	1.36573	1.42732	1.42829	1.34518
y2055	MMR	Developing country	102.18	91.1459	99.6931	95.1304	82.1189
y2055	LAO	Developing country	60.3943	75.3171	71.1263	71.8684	72.4467
y2055	THA	Developing country	111.438	92.1287	92.4774	90.5079	97.1335
y2055	KHM	Developing country	32.1033	27.9079	30.3071	29.0269	25.8629
y2055	VNM	Developing country	97.2791	119.403	111.243	112.182	118.937
y2055	RUS	Developing country	158.345	155.801	158.356	158.373	154.111
y2055	PRK	Developing country	7.16182	8.72078	7.49179	7.1079	7.92362
y2055	GRL	Developed income	1.06307	1.06307	1.06307	1.06307	1.06306
y2055	ISL	Developing country	0.857795	0.857662	0.857809	0.857809	0.857533
y2055	ESP	Developed income	27.9128	27.8294	28.0386	27.9397	25.8719
y2055	IRL	Developing country	0.794669	0.791688	0.794551	0.794536	0.791531
y2055	PRT	Developing country	3.66143	3.66142	3.66143	3.66143	3.57898
y2055	GBR	Developed income	4.97917	4.1692	4.97356	4.97271	4.1701
y2055	FRA	Developed income	23.7311	21.2027	28.1769	24.9525	20.0148
y2055	BEL	Developed income	0.659448	0.658626	0.658414	0.658257	0.640353
y2055	NLD	Developing country	0.641527	0.640859	0.640641	0.640507	0.613344
y2055	NOR	Developing country	3.20527	3.20507	3.2062	3.20551	3.1998
y2055	LUX	Developing country	0.0319329	0.031886	0.0318707	0.0318613	0.031835
y2055	DEU	Developed income	8.48351	8.35566	8.67169	8.51847	8.33263
y2055	CHE	Developed income	0.353413	0.353825	0.354828	0.353725	0.347268
y2055	ITA	Developing country	24.1012	23.8096	24.5213	24.2167	21.0336
y2055	DNK	Developed income	1.4152	1.41312	1.41245	1.41203	1.41547
y2055	AUT	Developed income	1.98608	1.18292	2.18706	2.03808	1.15613
y2055	SWE	Developing country	2.46963	3.71921	2.46891	2.46881	3.71669
y2055	CZE	Developed income	2.29299	2.26865	2.33042	2.30017	2.26513
y2055	HRV	Developing country	1.72808	1.4773	2.14111	1.82706	1.40562
y2055	SVN	Developing country	0.298926	0.248357	0.366867	0.310803	0.237796
y2055	SJM	Developing country	0.0692191	0.0692191	0.0692191	0.0692191	0.0692191
y2055	POL	Developing country	9.82362	9.80884	9.80478	9.80193	9.82087
y2055	BIH	Developing country	0.956016	0.957853	0.962017	0.957336	0.930373
y2055	HUN	Developing country	6.42664	5.50499	8.23261	6.94224	5.28459
y2055	SVK	Developing country	1.68784	1.28758	1.87023	1.73824	1.26438
y2055	MNE	Developing country	0.186263	0.186626	0.187447	0.186523	0.181167
y2055	SRB	Developing country	3.68126	3.68841	3.70458	3.68639	3.58885
y2055	ALB	Developing country	0.524702	0.525548	0.527403	0.525296	0.513637
y2055	GRC	Developed income	7.15403	7.154	7.15403	7.15403	6.38054
y2055	MKD	Developing country	0.620939	0.622004	0.624413	0.621703	0.606443
y2055	ROU	Developed income	14.2511	12.7147	17.1632	15.0731	11.8895
y2055	LTU	Developing country	2.0482	2.04519	2.04421	2.0436	2.0473
y2055	LVA	Developing country	0.645233	0.644241	0.64401	0.643825	0.642755
y2055	FIN	Developed income	1.79584	2.58595	1.79577	1.79576	2.59298
y2055	EST	Developed income	0.652448	0.650709	0.651812	0.651717	0.650454
y2055	BGR	Developing country	6.34019	5.86856	7.2222	6.58197	5.34004
y2055	BLR	Developing country	2.76301	2.72386	2.76424	2.76418	2.69874
y2055	TUR	Developing country	17.5786	17.5835	17.5947	17.5822	17.5122
y2055	MDA	Developing country	0.971491	0.955356	0.972571	0.972538	0.945342
y2055	CYP	Developed income	0.118777	0.118777	0.118777	0.118777	0.11833
y2055	IRN	Developing country	32.8168	32.8011	32.8065	32.8333	32.8124
y2055	UKR	Developing country	15.2233	14.9725	15.2394	15.2389	14.816
y2055	GEO	Developing country	0.534805	0.52904	0.534834	0.534827	0.525194
y2055	ARM	Developing country	0.481631	0.395145	0.482397	0.483229	0.332222
y2055	AZE	Developing country	3.36832	2.40073	3.38569	3.39733	1.57895
y2055	KAZ	Developing country	21.3539	17.617	21.3319	21.3518	15.7164
y2055	TKM	Developing country	8.29957	7.04491	8.33038	8.34771	5.8599
y2055	UZB	Developing country	18.0329	12.9268	18.1588	18.2289	8.14327
y2055	AFG	Developing country	9.09948	9.31846	8.97153	8.96305	9.29662
y2055	TJK	Developing country	3.44609	2.46776	3.4649	3.47856	1.57063
y2055	KGZ	Developing country	3.41354	2.58442	3.42972	3.44008	1.86046
y2055	MEX	Developing country	150.159	116.705	140.221	135.782	89.6336
y2055	USA	Developed income	272.298	264.125	269.843	267.459	256.47
y2055	GTM	Developing country	7.52316	5.35132	7.48772	6.6479	4.53237
y2055	ECU	Developing country	13.4171	10.2541	13.0382	13.1083	10.0128
y2055	SLV	Developing country	3.24195	2.07227	2.94948	1.93032	2.08327
y2055	HND	Developing country	6.88508	5.16764	6.72565	6.05511	4.72103
y2055	BLZ	Developing country	0.814006	0.351706	0.861186	0.78777	0.151403
y2055	NIC	Developing country	6.75161	5.51094	6.55561	5.97924	5.29632
y2055	CRI	Developing country	2.56142	2.17049	2.58899	2.5537	1.91494
y2055	CUB	Developing country	8.83516	8.97294	8.63825	8.86446	8.03259
y2055	PAN	Developing country	3.9968	3.66493	4.001	3.9933	3.37322
y2055	PER	Developing country	25.4252	20.2793	22.9665	22.6569	19.7517
y2055	COL	Developing country	40.3921	35.1164	40.501	40.0727	32.9644
y2055	BHS	Developed income	0.0622189	0.0209687	0.0666296	0.0597784	0.00361668
y2055	JAM	Developing country	0.359426	0.310138	0.361116	0.358136	0.272838
y2055	CHL	Developed income	27.9351	25.0898	26.8952	26.7166	24.9536
y2055	HTI	Developing country	2.56592	2.2029	2.40959	2.04221	2.17966
y2055	BRA	Developing country	272.503	182.638	266.214	249.421	178.356
y2055	ARG	Developing country	159.801	35.4495	118.797	107.432	34.4769
y2055	VEN	Developing country	71.4693	43.8627	43.4064	71.521	48.237
y2055	DOM	Developing country	4.12148	3.68014	4.03472	3.94121	3.01926
y2055	BOL	Developing country	10.6823	8.63208	9.20539	9.46316	8.23727
y2055	PRY	Developing country	5.52059	4.57342	5.40666	5.18219	4.10325
y2055	TTO	Developing country	1.75543	1.5771	1.57715	1.75542	1.54876
y2055	FLK	Developing country	8e-15	7e-15	8e-15	7e-15	7e-15
y2055	GUY	Developing country	12.5322	11.7136	11.6278	12.5161	11.3059
y2055	URY	Developed income	67.0602	8.59963	30.9962	30.7767	8.4831
y2055	SUR	Developing country	1.83858	2.25753	1.83853	1.83854	2.20912
y2055	GUF	Developing country	0.207836	0.658262	0.207831	0.207819	0.649931
y2055	SGS	Developing country	1e-15	0	1e-15	1e-15	0
y2055	MAR	Developing country	36.2682	36.2674	36.2654	36.2674	36.2674
y2055	TUN	Developing country	5.11671	5.15247	4.76234	5.1915	5.20353
y2055	SAU	Developing country	6.33733	5.92377	6.1032	6.77358	6.20647
y2055	ISR	Developing country	0.609881	0.609881	0.609881	0.609881	0.609881
y2055	JOR	Developing country	0.32117	0.32117	0.32117	0.32117	0.32117
y2055	LBN	Developing country	1.04348	1.04348	1.04331	1.04387	1.04348
y2055	SYR	Developing country	3.08711	3.08711	3.0862	3.08711	3.08711
y2055	IRQ	Developing country	4.92394	4.92376	4.92217	4.92376	4.92376
y2055	YEM	Developing country	4.28827	4.18134	4.22929	4.40111	4.25787
y2055	KWT	Developing country	0.122405	0.122405	0.122405	0.122405	0.122405
y2055	QAT	Developing country	0.00289365	0.00289365	0.00289365	0.00289365	0.00289365
y2055	OMN	Developing country	0.17189	0.142732	0.155354	0.202661	0.164572
y2055	ARE	Developed income	0.0704319	0.0704319	0.0704319	0.0702224	0.0704319
y2055	PAK	Developing country	97.0603	95.7603	94.5348	94.386	96.9251
y2055	CAN	Developed income	63.9032	63.9742	75.5391	64.0706	63.9444
y2055	PRI	Developing country	0.295313	0.236892	0.298206	0.293469	0.201182
y2055	AUS	Developed income	21.8559	21.8704	36.8633	33.9409	21.0293
y2055	JPN	Developing country	30.5157	32.6026	33.2065	33.2825	30.4936
y2055	NZL	Developing country	11.9227	11.9049	11.5503	11.9352	11.9039
y2055	IDN	Developing country	108.789	108.862	108.79	108.778	108.799
y2055	MYS	Developing country	17.9174	17.7941	17.8247	17.8203	17.7739
y2055	SGP	Developing country	0.052507	0.0520884	0.0521923	0.0521771	0.0520197
y2055	BRN	Developed income	0.0921858	0.091451	0.0916335	0.0916068	0.0913303
y2055	PHL	Developing country	28.8642	26.9183	26.7976	26.5955	27.593
y2055	TLS	Developing country	1.05058	1.05009	1.0429	1.04964	1.0639
y2055	KOR	Developing country	7.76086	9.48855	8.12254	7.69984	8.61106
y2055	PNG	Developing country	5.60479	6.39506	6.12164	6.18287	6.2912
y2055	SLB	Developing country	0.0727636	0.0721836	0.0723277	0.0723066	0.0720884
y2055	NCL	Developing country	0.172702	0.167883	0.198077	0.186257	0.128935
y2055	VUT	Developing country	0.0422836	0.0419466	0.0420303	0.042018	0.0418912
y2055	FJI	Developing country	0.31367	0.311744	0.31229	0.312392	0.309198
y2055	REU	Developing country	0.00946845	0.00954513	0.00946619	0.00837467	0.00939015
y2055	LKA	Developing country	18.1548	21.6281	20.4183	20.6032	21.6739
y2055	BGD	Developing country	61.3378	69.3081	65.2892	65.3667	72.5287
y2055	BTN	Developing country	0.36093	0.390798	0.366877	0.359264	0.372413
y2060	SEN	Developing country	23.4497	10.4246	26.8343	19.877	15.5353
y2060	GMB	Developing country	0.0899775	0.0711192	0.0764155	0.092478	0.093328
y2060	MRT	Developing country	4.74274	4.24174	4.8493	4.76039	4.33795
y2060	ESH	Developing country	3.5e-14	3.5e-14	3.4e-14	3.6e-14	3.4e-14
y2060	GNB	Developing country	0.549771	0.454401	0.484587	0.55345	0.553788
y2060	GIN	Developing country	6.64537	5.94798	6.16238	6.55875	6.53411
y2060	SLE	Developing country	2.69964	2.15764	2.16501	2.19142	2.18633
y2060	MLI	Developing country	20.5005	9.02798	23.1114	17.4676	13.6715
y2060	LBR	Developing country	2.70603	2.12605	2.13098	2.14018	2.14926
y2060	CIV	Developing country	18.7392	19.2949	19.3921	19.6017	19.5518
y2060	BFA	Developing country	13.0866	4.11592	14.8751	10.853	8.04188
y2060	GHA	Developing country	12.8145	12.7438	12.8601	13.1966	13.1809
y2060	TGO	Developing country	3.61051	3.91696	3.9219	3.9567	3.94728
y2060	NER	Developing country	99.5424	64.3933	109.066	89.7899	77.5085
y2060	BEN	Developing country	3.25916	2.78102	3.16585	3.07744	3.43735
y2060	DZA	Developing country	3.04141	2.94344	3.03415	3.01597	2.93811
y2060	NGA	Developing country	102.755	50.2417	118.295	90.7831	73.4063
y2060	CMR	Developing country	33.0925	13.2656	34.3952	30.5692	20.8596
y2060	GAB	Developing country	1.89795	1.89221	1.89963	1.8985	1.89837
y2060	GNQ	Developing country	0.5326	0.513392	0.5262	0.521504	0.544248
y2060	NAM	Developing country	2.49275	2.40178	2.57281	2.44469	2.15059
y2060	AGO	Developing country	6.10494	6.0069	6.32239	8.77305	6.0665
y2060	COG	Developing country	2.67978	2.38356	2.39262	2.39152	2.39145
y2060	COD	Developing country	26.4831	26.2836	26.8519	26.8341	26.7173
y2060	LBY	Developing country	9.85074	9.84156	9.79361	9.88576	9.85202
y2060	TCD	Developing country	28.1791	4.75625	31.2261	54.7094	13.8628
y2060	CAF	Developing country	7.02847	3.91999	7.23264	17.3224	5.12487
y2060	ZAF	Developing country	43.2988	41.3325	42.9992	41.7882	41.4442
y2060	BWA	Developing country	2.16405	2.16055	2.17869	2.16962	2.16337
y2060	ZMB	Developing country	3.29343	3.32616	3.33546	3.53365	3.31976
y2060	SDN	Developing country	44.048	38.7809	41.5678	40.8174	40.6207
y2060	ZWE	Developing country	8.42936	7.97867	8.43697	7.94	7.28755
y2060	LSO	Developing country	1.00121	0.872847	1.00115	1.09705	1.00064
y2060	BDI	Developing country	1.14309	1.14147	1.09745	1.13864	1.13864
y2060	RWA	Developing country	0.60956	0.609226	0.572673	0.606102	0.60707
y2060	TZA	Developing country	9.5667	9.31833	9.50376	10.1029	9.59153
y2060	UGA	Developing country	6.00506	5.85524	5.71583	5.9986	5.98553
y2060	MOZ	Developing country	4.81033	5.13525	4.91158	5.11102	4.74127
y2060	SWZ	Developing country	0.10946	0.104977	0.107391	0.106336	0.107093
y2060	MWI	Developing country	0.501535	0.404071	0.420082	0.53553	0.414047
y2060	ETH	Developing country	16.9517	15.8569	16.4827	16.4208	16.8672
y2060	EGY	Developing country	45.0373	45.302	44.6054	45.3024	45.3762
y2060	KEN	Developing country	18.0418	17.1411	17.8531	18.8578	17.9878
y2060	ERI	Developing country	3.7783	3.46042	3.82582	3.99123	3.66262
y2060	SOM	Developing country	22.8094	22.8001	22.8093	23.0266	22.8078
y2060	DJI	Developing country	0.00769616	0.00738029	0.00769582	0.00769583	0.00722279
y2060	MDG	Developing country	10.0885	10.5282	9.94731	10.6458	10.7103
y2060	MUS	Developing country	0	0	0	0	0
y2060	ATF	Developing country	0	0	0	0	0
y2060	CHN	Developing country	765.51	616.578	660.999	654.242	602.125
y2060	IND	Developing country	1102.18	1117.48	1123.84	1126.88	1073.27
y2060	NPL	Developing country	21.9936	25.9539	24.3816	24.6439	26.3284
y2060	MNG	Developing country	1.42632	1.37938	1.48311	1.43952	1.36017
y2060	MMR	Developing country	104.333	84.0244	109.771	102.028	81.286
y2060	LAO	Developing country	61.4924	74.1843	71.2861	71.8596	74.1086
y2060	THA	Developing country	107.727	84.7555	101.479	95.9555	95.9183
y2060	KHM	Developing country	32.4588	25.6969	33.5337	31.1534	25.5943
y2060	VNM	Developing country	98.3391	117.679	110.148	111.441	119.513
y2060	RUS	Developing country	159.496	157.056	159.527	159.533	155.086
y2060	PRK	Developing country	7.04953	7.78746	6.6689	7.05923	7.80321
y2060	GRL	Developed income	1.06905	1.06905	1.06905	1.06905	1.06905
y2060	ISL	Developing country	0.86035	0.860206	0.860352	0.860352	0.860077
y2060	ESP	Developed income	27.2187	27.1128	27.3184	27.2211	25.1958
y2060	IRL	Developing country	0.817195	0.817484	0.817088	0.817088	0.814143
y2060	PRT	Developing country	3.5402	3.54019	3.5402	3.5402	3.45943
y2060	GBR	Developed income	5.02355	4.21866	5.01821	5.01824	4.21513
y2060	FRA	Developed income	23.5375	21.0474	27.9122	24.7419	19.8893
y2060	BEL	Developed income	0.661026	0.660452	0.66004	0.660046	0.642576
y2060	NLD	Developing country	0.641347	0.640857	0.640501	0.640506	0.613953
y2060	NOR	Developing country	3.21621	3.21542	3.21638	3.21649	3.21489
y2060	LUX	Developing country	0.0321716	0.0321372	0.0321122	0.0321126	0.0320881
y2060	DEU	Developed income	8.55956	8.42401	8.73238	8.58385	8.40172
y2060	CHE	Developed income	0.356806	0.356347	0.357071	0.357234	0.357412
y2060	ITA	Developing country	23.6454	23.3575	24.0582	23.7583	20.6413
y2060	DNK	Developed income	1.43584	1.4343	1.43319	1.4332	1.43678
y2060	AUT	Developed income	1.99414	1.1848	2.18302	2.03646	1.15837
y2060	SWE	Developing country	2.51035	3.7654	2.50967	2.50967	3.75619
y2060	CZE	Developed income	2.30856	2.28694	2.34698	2.31784	2.28357
y2060	HRV	Developing country	1.76262	1.46745	2.12136	1.81223	1.39763
y2060	SVN	Developing country	0.31898	0.24706	0.363843	0.308637	0.236768
y2060	SJM	Developing country	0.0693533	0.0693533	0.0693533	0.0693533	0.0693533
y2060	POL	Developing country	9.91157	9.90121	9.89355	9.89367	9.91339
y2060	BIH	Developing country	0.969896	0.968037	0.971019	0.971711	0.972937
y2060	HUN	Developing country	6.32197	5.46966	8.15658	6.88643	5.25562
y2060	SVK	Developing country	1.68724	1.29255	1.87072	1.74095	1.26969
y2060	MNE	Developing country	0.188999	0.188633	0.189221	0.189357	0.189561
y2060	SRB	Developing country	3.73413	3.72692	3.7385	3.74119	3.75354
y2060	ALB	Developing country	0.529714	0.528896	0.530219	0.53053	0.53158
y2060	GRC	Developed income	6.99945	6.99943	6.99945	6.99945	6.24234
y2060	MKD	Developing country	0.627343	0.626267	0.627993	0.628393	0.629481
y2060	ROU	Developed income	14.0663	12.6142	16.9964	14.9389	11.8082
y2060	LTU	Developing country	2.06556	2.06336	2.06175	2.06178	2.06563
y2060	LVA	Developing country	0.651007	0.650335	0.649838	0.649845	0.648804
y2060	FIN	Developed income	1.83532	2.63254	1.83526	1.83526	2.63265
y2060	EST	Developed income	0.664046	0.663876	0.66344	0.663444	0.662239
y2060	BGR	Developing country	6.27468	5.80629	7.13888	6.50887	5.28935
y2060	BLR	Developing country	2.79934	2.76215	2.80055	2.80051	2.75285
y2060	TUR	Developing country	17.4024	17.3974	17.4054	17.4072	17.4127
y2060	MDA	Developing country	0.982432	0.967165	0.983502	0.983477	0.964379
y2060	CYP	Developed income	0.114551	0.114551	0.114551	0.114551	0.114116
y2060	IRN	Developing country	32.6566	32.6419	32.6522	32.682	32.6537
y2060	UKR	Developing country	15.394	15.1567	15.4099	15.4095	15.1123
y2060	GEO	Developing country	0.541522	0.536052	0.541559	0.541554	0.534474
y2060	ARM	Developing country	0.480293	0.396967	0.48179	0.482097	0.317035
y2060	AZE	Developing country	3.33935	2.4061	3.36679	3.37122	1.51392
y2060	KAZ	Developing country	21.2094	17.619	21.2039	21.2104	14.1409
y2060	TKM	Developing country	8.17238	6.96151	8.21828	8.22492	5.80144
y2060	UZB	Developing country	17.8057	12.8773	17.9929	18.0197	8.18536
y2060	AFG	Developing country	9.00959	9.4027	9.00028	9.0145	9.39951
y2060	TJK	Developing country	3.41031	2.46605	3.44049	3.44612	1.56389
y2060	KGZ	Developing country	3.3917	2.59198	3.41686	3.42081	1.82638
y2060	MEX	Developing country	147.684	118.885	129.934	132.766	89.6274
y2060	USA	Developed income	272.769	259.238	266.519	266.95	257.971
y2060	GTM	Developing country	7.51763	5.43746	7.10133	6.61194	4.56835
y2060	ECU	Developing country	13.5757	10.4316	13.2223	13.3779	10.2402
y2060	SLV	Developing country	3.23192	2.09037	2.42055	1.90115	2.09382
y2060	HND	Developing country	6.91273	5.25166	6.23846	6.00338	4.77933
y2060	BLZ	Developing country	0.809538	0.357037	0.856899	0.78231	0.151557
y2060	NIC	Developing country	6.7436	5.59162	6.164	5.78504	5.28111
y2060	CRI	Developing country	2.54203	2.25417	2.56996	2.51946	1.86771
y2060	CUB	Developing country	8.73826	9.09398	8.51365	8.7548	8.03003
y2060	PAN	Developing country	3.95614	3.85451	3.96047	3.92267	3.25159
y2060	PER	Developing country	25.3796	21.0275	23.1409	22.9304	19.9523
y2060	COL	Developing country	40.5192	36.2769	40.6376	40.3316	32.7047
y2060	BHS	Developed income	0.0618859	0.0212971	0.0663064	0.0593725	0.00363922
y2060	JAM	Developing country	0.36133	0.316206	0.36315	0.359671	0.294611
y2060	CHL	Developed income	26.7662	24.1282	25.6896	25.6964	23.8776
y2060	HTI	Developing country	2.55218	2.22758	2.18759	2.01945	2.18073
y2060	BRA	Developing country	279.701	187.525	272.621	265.21	181.31
y2060	ARG	Developing country	161.532	36.6112	122.059	127.237	35.5384
y2060	VEN	Developing country	71.2461	44.0587	71.3004	71.2935	48.397
y2060	DOM	Developing country	4.06131	3.72192	3.87413	3.8727	3.01831
y2060	BOL	Developing country	10.8879	9.04986	9.36976	9.79528	8.98688
y2060	PRY	Developing country	5.78865	4.81972	5.67617	5.60638	4.97961
y2060	TTO	Developing country	1.76801	1.59191	1.76796	1.768	1.56776
y2060	FLK	Developing country	8e-15	7e-15	8e-15	8e-15	7e-15
y2060	GUY	Developing country	12.6261	11.8331	12.5488	12.6118	11.4609
y2060	URY	Developed income	68.7603	8.7064	30.0986	25.4735	8.56851
y2060	SUR	Developing country	1.8651	2.29096	1.86506	1.86507	2.25789
y2060	GUF	Developing country	0.211019	0.669108	0.211014	0.211002	0.664921
y2060	SGS	Developing country	1e-15	0	1e-15	1e-15	0
y2060	MAR	Developing country	35.6666	35.6659	35.6639	35.6659	35.6659
y2060	TUN	Developing country	4.92616	5.10603	4.6309	5.1064	5.16043
y2060	SAU	Developing country	6.47002	6.10015	6.39644	7.10878	6.38137
y2060	ISR	Developing country	0.679862	0.679862	0.679862	0.679862	0.679862
y2060	JOR	Developing country	0.360915	0.360915	0.360915	0.360915	0.360915
y2060	LBN	Developing country	1.1665	1.1665	1.16633	1.16689	1.1665
y2060	SYR	Developing country	3.24715	3.24715	3.24621	3.24715	3.24715
y2060	IRQ	Developing country	4.9907	4.99052	4.98888	4.99052	4.99052
y2060	YEM	Developing country	4.59139	4.49568	4.57404	4.75675	4.57177
y2060	KWT	Developing country	0.136101	0.136101	0.136101	0.136101	0.136101
y2060	QAT	Developing country	0.00309149	0.00309149	0.00309149	0.00309149	0.00309149
y2060	OMN	Developing country	0.168003	0.141974	0.162799	0.212976	0.163641
y2060	ARE	Developed income	0.0761228	0.0761228	0.0761228	0.0759414	0.0761228
y2060	PAK	Developing country	96.6776	95.2844	95.5149	95.2044	97.1772
y2060	CAN	Developed income	64.7059	64.8016	76.6104	64.864	64.74
y2060	PRI	Developing country	0.29814	0.243327	0.301208	0.295894	0.2105
y2060	AUS	Developed income	21.9809	21.996	37.3151	32.0979	21.1964
y2060	JPN	Developing country	30.4839	33.8849	33.9073	33.9547	31.8064
y2060	NZL	Developing country	12.1229	12.131	11.5673	12.1351	12.1044
y2060	IDN	Developing country	112.627	111.5	111.036	110.369	111.507
y2060	MYS	Developing country	18.3021	17.8598	17.7406	17.7258	17.84
y2060	SGP	Developing country	0.0538807	0.052377	0.0519717	0.0519216	0.0523096
y2060	BRN	Developed income	0.0947581	0.0921136	0.0914007	0.0913127	0.091995
y2060	PHL	Developing country	28.7571	26.0921	27.676	27.064	27.4493
y2060	TLS	Developing country	1.11362	1.1154	1.10777	1.0975	1.13002
y2060	KOR	Developing country	7.64097	8.46446	7.21738	7.65015	8.48321
y2060	PNG	Developing country	5.6941	6.37372	6.09618	6.16194	6.41206
y2060	SLB	Developing country	0.0754239	0.073319	0.0727515	0.0726815	0.0732246
y2060	NCL	Developing country	0.188329	0.158466	0.217594	0.200464	0.128734
y2060	VUT	Developing country	0.0434532	0.0422405	0.0419136	0.0418733	0.0421862
y2060	FJI	Developing country	0.321154	0.314514	0.311916	0.312138	0.312156
y2060	REU	Developing country	0.00958367	0.00964666	0.00957533	0.00841725	0.00949471
y2060	LKA	Developing country	18.4985	21.5916	20.42	20.5682	21.874
y2060	BGD	Developing country	61.4427	68.1661	65.2913	65.1277	70.9017
y2060	BTN	Developing country	0.362217	0.372724	0.347143	0.357171	0.370955
y2070	SEN	Developing country	25.1391	9.59058	26.4378	23.2513	14.8124
y2070	GMB	Developing country	0.0856093	0.0738595	0.0771754	0.0898175	0.0942774
y2070	MRT	Developing country	5.3802	4.29872	4.97494	5.01459	4.60816
y2070	ESH	Developing country	3.6e-14	3.5e-14	3.6e-14	3.7e-14	3.4e-14
y2070	GNB	Developing country	0.548426	0.472677	0.493575	0.538427	0.560359
y2070	GIN	Developing country	7.3322	6.59839	6.75715	6.92857	7.07862
y2070	SLE	Developing country	3.83206	2.58983	2.59586	2.58899	2.60289
y2070	MLI	Developing country	39.7724	8.8275	23.3097	20.7067	13.5398
y2070	LBR	Developing country	3.89839	2.53766	2.53869	2.52587	2.54932
y2070	CIV	Developing country	21.053	22.9162	22.9966	22.8826	23.0217
y2070	BFA	Developing country	25.3898	4.31355	15.2986	13.5942	8.22294
y2070	GHA	Developing country	14.4714	15.0627	15.1329	15.2525	15.3799
y2070	TGO	Developing country	3.96178	4.56902	4.45096	4.51947	4.51223
y2070	NER	Developing country	86.2545	57.6266	103.651	94.7259	71.9909
y2070	BEN	Developing country	3.6715	3.12518	3.65938	3.53813	3.86083
y2070	DZA	Developing country	3.10936	3.00776	3.07363	3.07873	3.01007
y2070	NGA	Developing country	94.2788	53.2817	123.159	109.057	76.9189
y2070	CMR	Developing country	33.4741	14.0798	34.5555	31.4594	21.8454
y2070	GAB	Developing country	1.96718	1.96116	1.96611	1.96578	1.9663
y2070	GNQ	Developing country	0.569303	0.52852	0.532544	0.53111	0.558696
y2070	NAM	Developing country	2.36899	2.29443	2.45182	2.41346	2.09507
y2070	AGO	Developing country	6.6315	6.53945	6.86321	8.07083	6.56034
y2070	COG	Developing country	3.19981	2.49809	2.50435	2.50098	2.50335
y2070	COD	Developing country	27.7031	27.62	28.1171	27.9788	27.8639
y2070	LBY	Developing country	9.38444	9.33828	9.30978	9.36323	9.35715
y2070	TCD	Developing country	49.67	4.83026	30.9524	55.452	14.2144
y2070	CAF	Developing country	6.56693	3.57947	6.76035	16.4017	4.82155
y2070	ZAF	Developing country	41.2368	39.5515	41.0255	40.555	39.1306
y2070	BWA	Developing country	2.12794	2.12638	2.14179	2.13318	2.12702
y2070	ZMB	Developing country	4.59331	4.61681	4.61304	4.72379	4.52409
y2070	SDN	Developing country	44.4167	39.9498	43.0026	42.3208	40.4302
y2070	ZWE	Developing country	8.35101	8.10344	8.41194	8.54604	7.48318
y2070	LSO	Developing country	1.02185	1.00806	1.02187	1.12406	1.02114
y2070	BDI	Developing country	1.27601	1.27627	1.27634	1.27634	1.27433
y2070	RWA	Developing country	0.705257	0.706543	0.705837	0.705836	0.705257
y2070	TZA	Developing country	10.7371	10.8131	10.907	11.2751	10.399
y2070	UGA	Developing country	6.75589	6.78895	6.80197	6.82646	6.79275
y2070	MOZ	Developing country	5.80678	6.20694	5.92334	6.20359	6.00884
y2070	SWZ	Developing country	0.125334	0.122103	0.124427	0.122898	0.123312
y2070	MWI	Developing country	0.590271	0.559832	0.567727	0.626975	0.582311
y2070	ETH	Developing country	17.6787	17.1538	17.372	17.3605	17.8785
y2070	EGY	Developing country	43.4041	43.2655	42.8295	43.2489	43.4022
y2070	KEN	Developing country	17.8957	19.6904	19.8436	20.9921	19.6561
y2070	ERI	Developing country	4.08781	3.99931	4.25174	4.49382	4.01154
y2070	SOM	Developing country	21.9437	22.3674	22.3692	22.6072	22.3016
y2070	DJI	Developing country	0.00715181	0.00670785	0.00715111	0.00715111	0.00723649
y2070	MDG	Developing country	11.132	11.1416	11.1811	11.2217	11.4482
y2070	MUS	Developing country	0	0	0	0	0
y2070	ATF	Developing country	0	0	0	0	0
y2070	CHN	Developing country	710.159	543.641	562.667	618.641	533.934
y2070	IND	Developing country	1083.4	1065.58	1076.77	1080.18	1040.11
y2070	NPL	Developing country	22.9891	25.3038	24.0746	24.0059	25.7331
y2070	MNG	Developing country	1.59796	1.39007	1.59476	1.44247	1.3739
y2070	MMR	Developing country	98.612	83.9416	108.12	109.323	75.3279
y2070	LAO	Developing country	64.3127	72.4924	71.0259	70.5938	72.7686
y2070	THA	Developing country	102.457	84.6102	100.025	102.397	88.3059
y2070	KHM	Developing country	30.6295	25.6883	33.0334	33.4654	23.6199
y2070	VNM	Developing country	103.603	114.889	109.168	108.612	117.166
y2070	RUS	Developing country	163.228	162.909	163.216	163.192	159.676
y2070	PRK	Developing country	6.93564	7.64755	6.52772	6.8194	7.65838
y2070	GRL	Developed income	1.08909	1.08908	1.08909	1.08909	1.08908
y2070	ISL	Developing country	0.864684	0.864537	0.864681	0.864681	0.86441
y2070	ESP	Developed income	25.8521	25.5105	25.8526	25.6564	24.1921
y2070	IRL	Developing country	0.877776	0.874305	0.874499	0.874416	0.871646
y2070	PRT	Developing country	3.28886	3.28885	3.28886	3.28886	3.23258
y2070	GBR	Developed income	5.17096	4.35446	5.16587	5.16113	4.35539
y2070	FRA	Developed income	23.1117	20.7237	27.2852	24.2626	19.8051
y2070	BEL	Developed income	0.667889	0.667613	0.667782	0.6669	0.655813
y2070	NLD	Developing country	0.643594	0.6434	0.643536	0.642781	0.62547
y2070	NOR	Developing country	3.4075	3.39113	3.35093	3.37334	3.26131
y2070	LUX	Developing country	0.0329136	0.0328999	0.0329095	0.0328564	0.0328906
y2070	DEU	Developed income	8.87223	8.61749	8.99881	8.78889	8.60716
y2070	CHE	Developed income	0.639654	0.614233	0.549001	0.584921	0.408347
y2070	ITA	Developing country	22.6486	22.3594	23.0389	22.7481	20.4967
y2070	DNK	Developed income	1.46814	1.46753	1.46796	1.46559	1.4719
y2070	AUT	Developed income	2.09341	1.19244	2.23831	2.05916	1.16838
y2070	SWE	Developing country	2.64189	3.89976	2.63504	2.63447	3.89187
y2070	CZE	Developed income	2.34518	2.33983	2.39078	2.3656	2.33964
y2070	HRV	Developing country	2.20559	1.44597	2.3603	1.86038	1.38484
y2070	SVN	Developing country	0.532467	0.244285	0.489003	0.342002	0.234716
y2070	SJM	Developing country	0.0701164	0.0701164	0.0701164	0.0701164	0.0701164
y2070	POL	Developing country	10.1661	10.1613	10.1642	10.1481	10.1864
y2070	BIH	Developing country	2.17337	2.06521	1.78733	1.94029	1.1889
y2070	HUN	Developing country	5.65101	5.39169	7.62123	6.65012	5.19454
y2070	SVK	Developing country	1.66392	1.30704	1.85437	1.74565	1.28672
y2070	MNE	Developing country	0.426434	0.405095	0.35027	0.380449	0.232152
y2070	SRB	Developing country	8.41127	7.99096	6.9111	7.50552	4.59483
y2070	ALB	Developing country	1.06809	1.01943	0.894342	0.963187	0.625597
y2070	GRC	Developed income	6.64735	6.64733	6.64735	6.64735	6.13039
y2070	MKD	Developing country	1.32035	1.25773	1.09685	1.18541	0.750887
y2070	ROU	Developed income	13.1701	12.3913	16.2096	14.5117	11.7588
y2070	LTU	Developing country	2.11498	2.1141	2.11471	2.1113	2.11907
y2070	LVA	Developing country	0.668018	0.667666	0.667863	0.666814	0.666908
y2070	FIN	Developed income	1.95697	2.75348	1.94974	1.94972	2.75668
y2070	EST	Developed income	0.698084	0.696446	0.696595	0.696059	0.695606
y2070	BGR	Developing country	6.15689	5.66611	6.96473	6.34615	5.28808
y2070	BLR	Developing country	2.93443	2.90149	2.93578	2.93558	2.90212
y2070	TUR	Developing country	20.0538	19.7644	19.0209	19.4302	17.4224
y2070	MDA	Developing country	1.02436	1.01096	1.02547	1.0255	1.01271
y2070	CYP	Developed income	0.104991	0.104991	0.104991	0.104991	0.104593
y2070	IRN	Developing country	32.1133	32.1026	32.1668	32.1446	32.1113
y2070	UKR	Developing country	16.0516	15.8433	16.0683	16.0686	15.8692
y2070	GEO	Developing country	0.564399	0.559556	0.564465	0.564429	0.559397
y2070	ARM	Developing country	0.481254	0.489215	0.480351	0.479641	0.343563
y2070	AZE	Developing country	3.31169	3.43329	3.30689	3.29738	1.65287
y2070	KAZ	Developing country	21.1697	21.3252	21.0953	21.0756	16.0709
y2070	TKM	Developing country	7.97535	8.16515	7.97434	7.96042	5.703
y2070	UZB	Developing country	17.4767	18.2486	17.4732	17.4165	8.26627
y2070	AFG	Developing country	9.843	10.3894	9.8344	9.85723	10.3882
y2070	TJK	Developing country	3.35749	3.49264	3.35245	3.34265	1.61419
y2070	KGZ	Developing country	3.37306	3.48314	3.36975	3.36136	1.9306
y2070	MEX	Developing country	162.021	120.274	126.153	141.393	89.5087
y2070	USA	Developed income	273.697	256.178	266.129	266.018	257.85
y2070	GTM	Developing country	8.64142	5.66892	7.02283	7.20151	4.75168
y2070	ECU	Developing country	13.7811	12.7937	13.4303	13.5887	10.4141
y2070	SLV	Developing country	4.80034	2.41321	2.3629	2.65466	2.11574
y2070	HND	Developing country	8.36855	5.55679	6.18338	6.98621	5.0105
y2070	BLZ	Developing country	0.804682	0.354695	0.846508	0.777741	0.152151
y2070	NIC	Developing country	7.44402	5.73061	6.01611	6.49326	5.24989
y2070	CRI	Developing country	2.46264	2.20755	2.51403	2.48325	1.87984
y2070	CUB	Developing country	8.7075	8.97218	8.33934	8.6828	8.04443
y2070	PAN	Developing country	3.78125	3.74686	3.84686	3.84041	3.25731
y2070	PER	Developing country	25.1336	21.271	22.9539	22.8913	20.4801
y2070	COL	Developing country	40.1407	37.0401	40.3728	40.3152	33.2099
y2070	BHS	Developed income	0.0615269	0.021169	0.0655148	0.0590378	0.0036724
y2070	JAM	Developing country	0.363804	0.318667	0.364049	0.36219	0.29688
y2070	CHL	Developed income	24.359	23.3269	23.3207	23.3377	21.8122
y2070	HTI	Developing country	3.17254	2.34574	2.14633	2.30636	2.18936
y2070	BRA	Developing country	283.919	215.464	278.126	279.361	186.3
y2070	ARG	Developing country	163.798	39.1814	122.648	138.498	37.3771
y2070	VEN	Developing country	70.5314	44.8896	70.42	70.4201	48.1525
y2070	DOM	Developing country	4.28738	3.69611	3.76708	3.96742	3.02163
y2070	BOL	Developing country	11.493	9.36689	9.75817	10.3103	9.64242
y2070	PRY	Developing country	6.31181	5.2447	6.09577	6.15895	5.51092
y2070	TTO	Developing country	1.77398	1.60806	1.77346	1.77351	1.5834
y2070	FLK	Developing country	8e-15	7e-15	8e-15	8e-15	7e-15
y2070	GUY	Developing country	12.6416	11.981	12.683	12.6759	11.6005
y2070	URY	Developed income	73.4917	8.80697	29.4632	24.1326	8.6901
y2070	SUR	Developing country	1.8897	2.32264	1.8898	1.8898	2.29332
y2070	GUF	Developing country	0.213959	0.679825	0.214069	0.214056	0.675806
y2070	SGS	Developing country	1e-15	0	1e-15	1e-15	0
y2070	MAR	Developing country	34.3013	34.3	34.2903	34.3005	34.3005
y2070	TUN	Developing country	5.02459	4.92715	4.63718	4.9154	5.02415
y2070	SAU	Developing country	6.55376	6.27168	7.28571	7.28516	6.49138
y2070	ISR	Developing country	0.83277	0.83277	0.83277	0.83277	0.83277
y2070	JOR	Developing country	0.446656	0.446656	0.446656	0.446656	0.446656
y2070	LBN	Developing country	1.29774	1.29774	1.29758	1.2981	1.29774
y2070	SYR	Developing country	3.66881	3.66879	3.66752	3.66881	3.66881
y2070	IRQ	Developing country	5.08467	5.0842	5.0777	5.08451	5.08451
y2070	YEM	Developing country	4.71019	4.63729	4.90107	4.89927	4.6972
y2070	KWT	Developing country	0.156939	0.156939	0.156939	0.156939	0.156939
y2070	QAT	Developing country	0.00338395	0.00338395	0.00338395	0.00338395	0.00338395
y2070	OMN	Developing country	0.165123	0.145256	0.21665	0.21665	0.162552
y2070	ARE	Developed income	0.0816823	0.0816823	0.0816823	0.0815603	0.0816823
y2070	PAK	Developing country	97.5607	96.5785	96.469	96.9787	97.7968
y2070	CAN	Developed income	66.8618	66.94	79.2291	66.8369	66.8884
y2070	PRI	Developing country	0.306027	0.249511	0.307543	0.303749	0.216897
y2070	AUS	Developed income	22.2097	22.1996	38.2079	31.8685	21.4803
y2070	JPN	Developing country	30.6052	34.7886	34.5507	34.5488	33.7025
y2070	NZL	Developing country	12.5757	12.5834	11.6133	12.5817	12.5576
y2070	IDN	Developing country	120.569	111.966	111.557	111.959	113.894
y2070	MYS	Developing country	20.0843	18.0923	17.9687	17.9582	18.0722
y2070	SGP	Developing country	0.060236	0.0534545	0.0530337	0.052998	0.0533862
y2070	BRN	Developed income	0.106176	0.0942221	0.0934804	0.0934174	0.0941016
y2070	PHL	Developing country	29.9216	26.236	27.6882	27.9347	26.7443
y2070	TLS	Developing country	1.14819	1.09367	1.08721	1.10724	1.16504
y2070	KOR	Developing country	7.51722	8.32076	7.06545	7.39445	8.33444
y2070	PNG	Developing country	6.04534	6.307	6.11301	6.09314	6.38585
y2070	SLB	Developing country	0.0854772	0.075854	0.0752568	0.0752061	0.0757569
y2070	NCL	Developing country	0.182901	0.159883	0.215848	0.215344	0.123497
y2070	VUT	Developing country	0.0486813	0.0432006	0.0428605	0.0428316	0.0431454
y2070	FJI	Developing country	0.351919	0.319749	0.316856	0.316683	0.318625
y2070	REU	Developing country	0.00997541	0.0100347	0.00997713	0.00877208	0.00986763
y2070	LKA	Developing country	19.5928	21.1791	20.2977	20.1914	21.6387
y2070	BGD	Developing country	64.206	66.533	64.0501	63.8188	68.6299
y2070	BTN	Developing country	0.370815	0.371438	0.341868	0.353257	0.370661
y2080	SEN	Developing country	22.6122	8.78817	23.3084	23.8289	14.1386
y2080	GMB	Developing country	0.0836507	0.0715479	0.0837575	0.0853177	0.0920664
y2080	MRT	Developing country	5.13763	4.15755	5.05184	4.8431	4.51045
y2080	ESH	Developing country	3.4e-14	3.3e-14	3.4e-14	3.5e-14	3.4e-14
y2080	GNB	Developing country	0.536723	0.458605	0.536515	0.512277	0.548103
y2080	GIN	Developing country	8.05355	7.08615	7.83686	7.35005	7.58252
y2080	SLE	Developing country	6.06488	3.08613	4.33009	3.09714	3.09784
y2080	MLI	Developing country	36.3022	8.40991	28.4211	21.4593	13.2652
y2080	LBR	Developing country	6.31729	3.02424	4.38403	3.02781	3.03424
y2080	CIV	Developing country	22.0851	27.0119	25.1837	27.0692	27.1122
y2080	BFA	Developing country	23.2278	4.28739	18.4605	14.4022	8.28689
y2080	GHA	Developing country	15.8554	17.6303	17.0652	17.8585	17.9389
y2080	TGO	Developing country	3.88162	5.34204	4.65548	5.14625	5.22051
y2080	NER	Developing country	76.9318	51.7467	85.4811	92.5553	66.3861
y2080	BEN	Developing country	3.63093	3.45876	3.90005	3.98218	4.31435
y2080	DZA	Developing country	3.13286	3.04459	3.09991	3.10345	3.03988
y2080	NGA	Developing country	92.7401	56.0662	107.61	117.605	78.939
y2080	CMR	Developing country	36.4458	15.1605	35.9283	32.5633	22.575
y2080	GAB	Developing country	2.06444	2.05784	2.06314	2.06254	2.06323
y2080	GNQ	Developing country	0.644087	0.548144	0.590975	0.551422	0.579269
y2080	NAM	Developing country	2.26871	2.28221	2.3852	2.30316	2.1884
y2080	AGO	Developing country	7.33969	7.00669	7.47941	7.98749	7.01843
y2080	COG	Developing country	4.34994	2.65736	3.35876	2.66277	2.66261
y2080	COD	Developing country	29.9722	29.6662	29.9419	29.5863	29.3537
y2080	LBY	Developing country	8.95497	8.92803	8.9169	8.95488	8.92928
y2080	TCD	Developing country	54.0533	4.86273	49.3217	55.5918	13.996
y2080	CAF	Developing country	8.81338	3.34282	10.4949	15.9297	4.51653
y2080	ZAF	Developing country	39.1999	38.3184	38.8082	38.3538	38.3752
y2080	BWA	Developing country	2.10285	2.10132	2.11739	2.10814	2.1073
y2080	ZMB	Developing country	5.86106	5.89342	5.8919	5.95308	5.62318
y2080	SDN	Developing country	45.5227	40.3296	43.3451	42.6339	40.9273
y2080	ZWE	Developing country	8.27453	8.56131	8.4082	8.5399	8.34283
y2080	LSO	Developing country	1.02232	1.02235	1.0221	1.13117	1.0213
y2080	BDI	Developing country	1.35422	1.45117	1.41162	1.43053	1.44897
y2080	RWA	Developing country	0.745054	0.830774	0.79546	0.812018	0.829259
y2080	TZA	Developing country	12.1231	12.1831	12.2108	12.4531	10.6449
y2080	UGA	Developing country	7.37379	7.75631	7.61607	7.69178	7.75025
y2080	MOZ	Developing country	6.7571	7.22963	6.99397	7.2441	7.12466
y2080	SWZ	Developing country	0.142844	0.139376	0.141085	0.139572	0.140427
y2080	MWI	Developing country	0.751629	0.712957	0.720663	0.754082	0.743366
y2080	ETH	Developing country	18.5903	18.3383	18.5298	18.3781	19.0265
y2080	EGY	Developing country	41.586	41.5167	41.2868	41.5901	41.5687
y2080	KEN	Developing country	17.6799	19.731	19.7143	20.1737	20.0261
y2080	ERI	Developing country	3.95495	3.91759	4.2732	4.24792	3.9955
y2080	SOM	Developing country	21.9385	22.3481	22.3491	22.4455	22.3473
y2080	DJI	Developing country	0.00677769	0.00633271	0.00677666	0.00677665	0.00684922
y2080	MDG	Developing country	12.3912	12.0569	12.2502	12.1901	12.3832
y2080	MUS	Developing country	0	0	0	0	0
y2080	ATF	Developing country	0	0	0	0	0
y2080	CHN	Developing country	639.258	565.051	573.487	583.141	560.048
y2080	IND	Developing country	1023.67	994.485	1012.48	1013.02	989.948
y2080	NPL	Developing country	22.4587	24.6935	23.5679	23.5633	25.0933
y2080	MNG	Developing country	1.60776	1.38681	1.6149	1.52556	1.36004
y2080	MMR	Developing country	101.891	83.9806	107.599	108.436	69.3668
y2080	LAO	Developing country	63.6798	70.8266	69.401	69.3875	70.8603
y2080	THA	Developing country	99.0611	84.5802	99.3979	101.59	81.6424
y2080	KHM	Developing country	31.3558	25.7174	32.8505	33.203	21.6909
y2080	VNM	Developing country	101.413	112.17	106.736	106.721	114.531
y2080	RUS	Developing country	164.408	164.344	164.442	164.329	161.219
y2080	PRK	Developing country	6.38775	7.55503	6.80894	6.72174	7.54829
y2080	GRL	Developed income	1.10829	1.10829	1.10829	1.10829	1.10829
y2080	ISL	Developing country	0.875779	0.875612	0.875752	0.875752	0.875488
y2080	ESP	Developed income	25.6926	24.2722	24.7313	24.4555	24.2498
y2080	IRL	Developing country	0.933771	0.932178	0.932202	0.9322	0.92953
y2080	PRT	Developing country	3.24912	3.11028	3.11029	3.11029	3.10658
y2080	GBR	Developed income	5.31808	4.49844	5.32365	5.32357	4.49699
y2080	FRA	Developed income	23.5457	20.2181	26.6462	23.8432	20.0853
y2080	BEL	Developed income	0.691115	0.676471	0.675951	0.675937	0.675724
y2080	NLD	Developing country	0.652778	0.648366	0.647912	0.6479	0.648112
y2080	NOR	Developing country	3.46487	3.42867	3.40155	3.41246	3.35293
y2080	LUX	Developing country	0.0335681	0.0336867	0.0336547	0.0336539	0.0336487
y2080	DEU	Developed income	9.05565	8.81407	9.24587	9.01128	8.81496
y2080	CHE	Developed income	0.646021	0.613685	0.56936	0.58687	0.494659
y2080	ITA	Developing country	20.5045	21.5994	22.2757	22.0005	21.6138
y2080	DNK	Developed income	1.49689	1.50243	1.501	1.50096	1.50563
y2080	AUT	Developed income	2.12177	1.19067	2.29223	2.09089	1.18364
y2080	SWE	Developing country	2.7701	4.0613	2.76749	2.76748	4.05307
y2080	CZE	Developed income	2.38937	2.39265	2.43248	2.41785	2.39414
y2080	HRV	Developing country	2.28852	1.40195	2.54471	1.89364	1.38717
y2080	SVN	Developing country	0.546154	0.237169	0.590401	0.368056	0.234141
y2080	SJM	Developing country	0.0706335	0.0706335	0.0706335	0.0706335	0.0706335
y2080	POL	Developing country	10.3953	10.4326	10.4229	10.4226	10.4497
y2080	BIH	Developing country	2.19005	2.05839	1.8693	1.94396	1.55144
y2080	HUN	Developing country	5.50761	5.22195	7.12197	6.43581	5.17543
y2080	SVK	Developing country	1.67879	1.31303	1.8432	1.75754	1.30753
y2080	MNE	Developing country	0.430544	0.403752	0.366443	0.381174	0.303661
y2080	SRB	Developing country	8.32409	7.96896	7.23371	7.52402	6.00984
y2080	ALB	Developing country	1.06333	1.01354	0.928394	0.962006	0.786061
y2080	GRC	Developed income	6.24628	6.37935	6.37937	6.37937	6.38077
y2080	MKD	Developing country	1.31615	1.25038	1.14089	1.18412	0.957523
y2080	ROU	Developed income	12.5229	12.0464	15.4742	14.1357	11.9733
y2080	LTU	Developing country	2.15847	2.16639	2.16433	2.16428	2.16965
y2080	LVA	Developing country	0.682762	0.685037	0.684411	0.684394	0.683698
y2080	FIN	Developed income	2.0707	2.88947	2.06697	2.06697	2.8934
y2080	EST	Developed income	0.729039	0.729466	0.729147	0.729138	0.728402
y2080	BGR	Developing country	5.88007	5.51056	6.80497	6.21374	5.48837
y2080	BLR	Developing country	2.9374	2.92527	2.94159	2.93893	2.91869
y2080	TUR	Developing country	19.5374	19.2285	18.7221	18.922	17.8742
y2080	MDA	Developing country	1.02453	1.01937	1.02576	1.02586	1.01779
y2080	CYP	Developed income	0.0969462	0.0969462	0.0969462	0.0969462	0.0965787
y2080	IRN	Developing country	31.5692	31.55	31.606	31.5849	31.5659
y2080	UKR	Developing country	16.0571	15.977	16.0759	16.0772	15.9512
y2080	GEO	Developing country	0.566646	0.564861	0.567185	0.56673	0.563668
y2080	ARM	Developing country	0.478881	0.483639	0.475408	0.475106	0.346625
y2080	AZE	Developing country	3.26025	3.33749	3.21949	3.21666	1.6661
y2080	KAZ	Developing country	21.0283	21.1035	20.889	20.8766	16.1478
y2080	TKM	Developing country	7.92573	8.04846	7.8711	7.8678	5.74124
y2080	UZB	Developing country	17.1991	17.6991	16.9777	16.9641	8.33909
y2080	AFG	Developing country	10.8475	11.5292	10.8526	10.8607	11.3611
y2080	TJK	Developing country	3.3019	3.38667	3.25665	3.25484	1.62702
y2080	KGZ	Developing country	3.33883	3.40873	3.30327	3.30117	1.95121
y2080	MEX	Developing country	207.775	138.242	130.157	137.806	94.3557
y2080	USA	Developed income	272.625	252.712	262.73	260.32	253.413
y2080	GTM	Developing country	17.1945	6.80971	7.30726	7.0182	4.91502
y2080	ECU	Developing country	13.6415	13.0785	13.3417	13.5513	10.1983
y2080	SLV	Developing country	5.91524	4.09662	2.90616	2.58987	2.08479
y2080	HND	Developing country	12.5409	7.03336	6.64681	6.82399	5.04477
y2080	BLZ	Developing country	2.24628	0.34248	0.827683	0.756763	0.165131
y2080	NIC	Developing country	9.42875	6.76798	6.27932	6.29805	5.12014
y2080	CRI	Developing country	3.99315	2.14193	2.44278	2.40866	1.84127
y2080	CUB	Developing country	21.5253	8.75099	8.16618	8.4298	8.78975
y2080	PAN	Developing country	4.11814	3.62883	3.72327	3.71594	3.08365
y2080	PER	Developing country	24.8199	21.5999	22.4111	22.5424	20.0949
y2080	COL	Developing country	43.2194	36.4833	39.5749	39.5189	32.1911
y2080	BHS	Developed income	0.17178	0.0204467	0.0640676	0.0574546	0.00399548
y2080	JAM	Developing country	0.822458	0.316904	0.360989	0.35796	0.308126
y2080	CHL	Developed income	21.6401	20.7571	20.6586	20.7421	19.1529
y2080	HTI	Developing country	5.83576	2.98069	2.3364	2.24475	2.28702
y2080	BRA	Developing country	296.103	220.029	273.842	277.924	186.996
y2080	ARG	Developing country	174.864	40.7551	118.35	133.41	37.947
y2080	VEN	Developing country	68.9773	43.0671	68.847	68.847	47.1893
y2080	DOM	Developing country	8.81419	3.8722	3.78043	3.84639	3.29481
y2080	BOL	Developing country	11.9213	10.0617	9.91569	10.4631	9.52773
y2080	PRY	Developing country	6.48394	5.7281	6.18604	6.22829	5.38145
y2080	TTO	Developing country	1.7386	1.57054	1.7381	1.73811	1.55589
y2080	FLK	Developing country	8e-15	8e-15	8e-15	8e-15	7e-15
y2080	GUY	Developing country	12.4011	11.7197	12.3858	12.4278	11.4231
y2080	URY	Developed income	79.465	8.97886	29.277	23.0227	8.88824
y2080	SUR	Developing country	1.86951	2.30263	1.86943	1.86941	2.27068
y2080	GUF	Developing country	0.211939	0.676678	0.212025	0.21201	0.671225
y2080	SGS	Developing country	1e-15	1e-15	1e-15	1e-15	0
y2080	MAR	Developing country	33.065	33.0647	33.0556	33.0653	33.0302
y2080	TUN	Developing country	4.88137	4.83095	4.68218	4.88133	4.88101
y2080	SAU	Developing country	6.46839	6.07541	6.88287	6.88226	6.39649
y2080	ISR	Developing country	1.02619	1.02619	1.02619	1.02619	1.02619
y2080	JOR	Developing country	0.555021	0.555021	0.555021	0.555021	0.555021
y2080	LBN	Developing country	1.32337	1.32337	1.32323	1.3237	1.32337
y2080	SYR	Developing country	4.18058	4.1806	4.1794	4.18062	4.18058
y2080	IRQ	Developing country	5.18818	5.18836	5.18218	5.18866	5.18804
y2080	YEM	Developing country	4.18562	4.08456	4.29362	4.29211	4.16713
y2080	KWT	Developing country	0.168229	0.168229	0.168229	0.168229	0.168229
y2080	QAT	Developing country	0.00359914	0.00359914	0.00359914	0.00359914	0.00359914
y2080	OMN	Developing country	0.167207	0.139457	0.19645	0.19645	0.16213
y2080	ARE	Developed income	0.0829675	0.0829675	0.0829675	0.0828742	0.0829675
y2080	PAK	Developing country	94.7551	94.8356	94.6076	94.9486	95.0541
y2080	CAN	Developed income	68.7528	68.8174	81.5165	68.7014	68.7247
y2080	PRI	Developing country	0.795776	0.247456	0.306462	0.301423	0.233571
y2080	AUS	Developed income	23.0784	21.9869	37.4597	31.6848	21.36
y2080	JPN	Developing country	31.0041	33.2008	33.3052	33.1323	33.4913
y2080	NZL	Developing country	12.9773	12.9848	11.6437	12.9826	12.948
y2080	IDN	Developing country	119.345	112.822	112.331	112.302	118.156
y2080	MYS	Developing country	20.256	18.3112	18.1746	18.1643	19.8617
y2080	SGP	Developing country	0.0610956	0.0544681	0.0540026	0.0539673	0.059752
y2080	BRN	Developed income	0.107831	0.0961334	0.0953118	0.0952496	0.105459
y2080	PHL	Developing country	29.6363	26.3962	27.7667	28.0088	27.61
y2080	TLS	Developing country	1.08372	1.08545	1.07807	1.08498	1.09957
y2080	KOR	Developing country	6.91825	8.22788	7.38233	7.28957	8.22266
y2080	PNG	Developing country	5.9862	6.2325	6.04489	6.04445	6.47791
y2080	SLB	Developing country	0.0872748	0.0778074	0.0771424	0.077092	0.0853554
y2080	NCL	Developing country	0.201869	0.161116	0.215789	0.21477	0.119368
y2080	VUT	Developing country	0.0494365	0.0440737	0.0436971	0.0436685	0.0483493
y2080	FJI	Developing country	0.355678	0.323371	0.321113	0.320942	0.34904
y2080	REU	Developing country	0.0106591	0.0106634	0.0106262	0.00934409	0.0105059
y2080	LKA	Developing country	19.2132	20.7549	19.8838	19.8836	21.2281
y2080	BGD	Developing country	62.5427	64.9745	62.5013	62.7008	66.672
y2080	BTN	Developing country	0.360683	0.370531	0.348473	0.350103	0.385817
y2090	SEN	Developing country	21.2451	8.37697	21.7864	22.3844	13.7791
y2090	GMB	Developing country	0.0824971	0.0713535	0.0824367	0.0824837	0.090994
y2090	MRT	Developing country	5.40713	4.04307	4.92996	4.64826	4.40355
y2090	ESH	Developing country	3e-14	2.9e-14	3e-14	3e-14	2.9e-14
y2090	GNB	Developing country	0.531101	0.458008	0.530591	0.530658	0.542506
y2090	GIN	Developing country	8.84735	7.83521	8.58218	8.41542	8.28857
y2090	SLE	Developing country	7.31482	3.71761	5.23667	3.75346	3.7221
y2090	MLI	Developing country	34.4896	8.26284	27.8042	20.848	13.148
y2090	LBR	Developing country	7.60951	3.63284	5.29862	3.6451	3.64879
y2090	CIV	Developing country	26.2367	32.2651	29.8839	32.6749	32.3076
y2090	BFA	Developing country	22.0856	4.37446	18.0733	13.8742	8.37772
y2090	GHA	Developing country	18.7271	20.933	20.1302	21.2448	21.1934
y2090	TGO	Developing country	4.5479	6.34223	5.49934	6.1432	6.19354
y2090	NER	Developing country	71.8202	48.0741	78.4442	85.9908	62.8802
y2090	BEN	Developing country	4.04318	3.94254	4.34713	4.51193	4.8425
y2090	DZA	Developing country	3.25696	3.17362	3.2566	3.2562	3.1688
y2090	NGA	Developing country	95.7697	62.7293	108.92	120.066	85.6287
y2090	CMR	Developing country	38.5564	16.6227	37.6119	33.6677	24.5006
y2090	GAB	Developing country	2.11449	2.10763	2.11306	2.1128	2.11781
y2090	GNQ	Developing country	0.670858	0.555013	0.607153	0.5587	0.607014
y2090	NAM	Developing country	2.31167	2.2617	2.35684	2.28055	2.19562
y2090	AGO	Developing country	7.89787	7.36723	7.86192	8.10106	7.37092
y2090	COG	Developing country	4.83753	2.79105	3.65273	2.7979	2.8011
y2090	COD	Developing country	31.8859	30.8075	31.0853	31.1008	30.6682
y2090	LBY	Developing country	8.75463	8.72766	8.75612	8.75417	8.73478
y2090	TCD	Developing country	81.4736	4.94854	58.544	54.7343	14.5703
y2090	CAF	Developing country	18.7993	3.16536	13.5295	15.657	4.42556
y2090	ZAF	Developing country	38.1696	37.3545	37.4354	37.3436	37.4402
y2090	BWA	Developing country	2.11528	2.10756	2.12215	2.11448	2.11359
y2090	ZMB	Developing country	6.84385	6.8439	6.84652	6.89015	6.33306
y2090	SDN	Developing country	46.8149	39.8863	44.2707	43.5685	42.361
y2090	ZWE	Developing country	8.31534	8.5847	8.572	8.58233	8.49335
y2090	LSO	Developing country	1.00874	1.00844	1.00822	1.12223	1.00751
y2090	BDI	Developing country	1.50026	1.61166	1.56621	1.54236	1.60913
y2090	RWA	Developing country	0.852446	0.950688	0.91027	0.889492	0.948953
y2090	TZA	Developing country	13.9643	13.7622	13.7856	13.9004	10.6194
y2090	UGA	Developing country	8.28064	8.65883	8.49853	8.41607	8.65189
y2090	MOZ	Developing country	7.44621	7.87551	7.86533	7.90726	7.8427
y2090	SWZ	Developing country	0.153603	0.150736	0.150992	0.150736	0.151464
y2090	MWI	Developing country	0.828189	0.814547	0.816474	0.841411	0.847848
y2090	ETH	Developing country	20.2197	19.4864	20.1792	20.0911	20.2873
y2090	EGY	Developing country	41.1983	41.0821	41.1683	41.2055	41.1801
y2090	KEN	Developing country	20.1154	19.5854	19.6227	19.5791	19.9456
y2090	ERI	Developing country	4.45281	3.81787	4.16924	4.01917	3.89702
y2090	SOM	Developing country	23.8785	22.4313	23.7658	23.7654	22.2067
y2090	DJI	Developing country	0.00693065	0.00609708	0.00655241	0.0065524	0.00662156
y2090	MDG	Developing country	13.4935	12.7223	13.2464	13.0938	13.2639
y2090	MUS	Developing country	0	0	0	0	0
y2090	ATF	Developing country	0	0	0	0	0
y2090	CHN	Developing country	575.681	489.703	508.288	499.53	476.908
y2090	IND	Developing country	886.631	870.462	872.606	874.769	864.365
y2090	NPL	Developing country	21.7386	23.9694	22.9682	22.8042	24.2614
y2090	MNG	Developing country	1.57366	1.3166	1.60824	1.55938	1.28725
y2090	MMR	Developing country	89.7436	83.8252	106.588	107.489	63.1339
y2090	LAO	Developing country	61.251	68.8399	67.3158	67.2539	68.3948
y2090	THA	Developing country	84.7993	84.3732	98.2539	100.65	74.6745
y2090	KHM	Developing country	27.3638	25.6974	32.4976	32.9323	19.6835
y2090	VNM	Developing country	98.2475	108.893	103.7	103.297	110.989
y2090	RUS	Developing country	163.571	163.273	163.437	163.177	159.954
y2090	PRK	Developing country	6.49182	7.3631	7.29065	6.55119	7.35506
y2090	GRL	Developed income	1.10825	1.10825	1.10825	1.10825	1.10825
y2090	ISL	Developing country	0.90185	0.901653	0.901789	0.901789	0.901532
y2090	ESP	Developed income	25.5778	23.5897	24.0377	23.8104	23.1918
y2090	IRL	Developing country	0.975909	0.974684	0.974769	0.974598	0.974119
y2090	PRT	Developing country	3.2368	3.02136	3.02136	3.02153	3.00238
y2090	GBR	Developed income	5.39345	4.54681	5.39878	5.39247	4.54681
y2090	FRA	Developed income	23.4824	19.9486	25.8047	23.2484	19.7126
y2090	BEL	Developed income	0.696467	0.672399	0.671771	0.670955	0.668037
y2090	NLD	Developing country	0.652339	0.644223	0.643676	0.642958	0.63843
y2090	NOR	Developing country	3.55192	3.51611	3.48421	3.50273	3.44484
y2090	LUX	Developing country	0.0335015	0.0335866	0.033548	0.0335083	0.0335314
y2090	DEU	Developed income	9.03942	8.81	9.21888	9.00031	8.80795
y2090	CHE	Developed income	0.64209	0.61006	0.557935	0.587745	0.497923
y2090	ITA	Developing country	19.3766	21.2622	21.8899	21.6378	20.7368
y2090	DNK	Developed income	1.49085	1.4969	1.49518	1.4914	1.49932
y2090	AUT	Developed income	2.13308	1.18903	2.29245	2.11701	1.18287
y2090	SWE	Developing country	2.87051	4.20798	2.86848	2.86784	4.20383
y2090	CZE	Developed income	2.38192	2.38672	2.42046	2.40106	2.38732
y2090	HRV	Developing country	2.27063	1.38176	2.48163	1.93378	1.36595
y2090	SVN	Developing country	0.532094	0.233935	0.583218	0.401433	0.23123
y2090	SJM	Developing country	0.0693852	0.0693852	0.0693852	0.0693852	0.0693852
y2090	POL	Developing country	10.3798	10.4189	10.4071	10.3831	10.4311
y2090	BIH	Developing country	2.15732	2.02687	1.80447	1.93161	1.54916
y2090	HUN	Developing country	5.3605	5.1464	6.80261	6.12422	5.10716
y2090	SVK	Developing country	1.67879	1.30934	1.82632	1.74363	1.30444
y2090	MNE	Developing country	0.424067	0.397522	0.353633	0.378723	0.303187
y2090	SRB	Developing country	8.20567	7.85251	6.98694	7.48176	6.0054
y2090	ALB	Developing country	1.04934	0.999928	0.899744	0.957006	0.785524
y2090	GRC	Developed income	6.03786	6.24371	6.24373	6.24357	6.09323
y2090	MKD	Developing country	1.29603	1.23078	1.10196	1.1756	0.954771
y2090	ROU	Developed income	12.0459	11.8948	14.935	13.6566	11.7412
y2090	LTU	Developing country	2.1517	2.1598	2.15731	2.15242	2.16193
y2090	LVA	Developing country	0.682575	0.684016	0.68326	0.682655	0.682382
y2090	FIN	Developed income	2.15836	3.00686	2.15564	2.15546	3.01589
y2090	EST	Developed income	0.746801	0.746965	0.746609	0.746272	0.746698
y2090	BGR	Developing country	5.68178	5.44508	6.62653	6.09179	5.34432
y2090	BLR	Developing country	2.80786	2.79738	2.80881	2.80688	2.78583
y2090	TUR	Developing country	19.416	19.1092	18.5129	18.8538	17.8316
y2090	MDA	Developing country	0.979483	0.976221	0.980915	0.980802	0.972424
y2090	CYP	Developed income	0.0916154	0.0916154	0.0916154	0.0916154	0.091268
y2090	IRN	Developing country	31.7784	31.762	31.7984	31.7805	31.7781
y2090	UKR	Developing country	15.357	15.3059	15.3784	15.3764	15.2458
y2090	GEO	Developing country	0.549208	0.547586	0.549182	0.548863	0.545685
y2090	ARM	Developing country	0.484292	0.480621	0.479434	0.470216	0.341906
y2090	AZE	Developing country	3.32741	3.29252	3.26945	3.14551	1.64614
y2090	KAZ	Developing country	20.9837	20.8224	20.804	20.553	15.4793
y2090	TKM	Developing country	8.30319	8.15188	8.22438	8.04333	4.98396
y2090	UZB	Developing country	17.9021	17.6501	17.582	16.8449	7.84382
y2090	AFG	Developing country	12.0193	12.061	12.0335	12.0227	12.0494
y2090	TJK	Developing country	3.40681	3.36186	3.34334	3.20839	1.59484
y2090	KGZ	Developing country	3.41731	3.38819	3.36696	3.25732	1.95817
y2090	MEX	Developing country	197.815	135.862	128.209	135.872	97.5156
y2090	USA	Developed income	268.17	248.123	260.374	257.468	242.806
y2090	GTM	Developing country	16.461	6.65647	7.25251	6.94125	4.90799
y2090	ECU	Developing country	13.8698	13.1302	13.3904	13.3435	10.1924
y2090	SLV	Developing country	5.33427	3.93401	2.91709	2.61488	2.11369
y2090	HND	Developing country	11.8242	6.85406	6.61209	6.6264	5.05329
y2090	BLZ	Developing country	2.19441	0.339907	0.81835	0.748011	0.163829
y2090	NIC	Developing country	8.87137	6.56175	6.18752	5.63681	5.10078
y2090	CRI	Developing country	3.89554	2.09541	2.39053	2.30927	1.80215
y2090	CUB	Developing country	20.9825	8.6504	8.05119	8.3139	8.83424
y2090	PAN	Developing country	4.00291	3.52751	3.61966	3.51009	2.99886
y2090	PER	Developing country	24.3686	21.0295	21.7936	21.9129	19.8145
y2090	COL	Developing country	42.458	35.8155	38.8327	38.3375	31.5683
y2090	BHS	Developed income	0.167843	0.020295	0.063355	0.0567956	0.0039643
y2090	JAM	Developing country	0.810399	0.31921	0.362207	0.359194	0.31071
y2090	CHL	Developed income	18.7773	17.9916	17.7885	17.7585	16.4093
y2090	HTI	Developing country	5.51911	2.90392	2.32654	2.23993	2.28695
y2090	BRA	Developing country	298.651	222.304	273.231	268.309	187.77
y2090	ARG	Developing country	182.236	42.6584	114.268	128.912	39.4107
y2090	VEN	Developing country	67.5133	42.3134	67.3177	67.294	46.3552
y2090	DOM	Developing country	8.51599	3.8001	3.72925	3.79862	3.35811
y2090	BOL	Developing country	12.2622	10.234	10.1218	10.6591	9.7807
y2090	PRY	Developing country	6.75079	5.95913	6.39305	6.42507	5.64181
y2090	TTO	Developing country	1.70867	1.54533	1.70798	1.70798	1.532
y2090	FLK	Developing country	8e-15	7e-15	7e-15	7e-15	7e-15
y2090	GUY	Developing country	12.2021	11.5326	12.1834	12.1636	11.2569
y2090	URY	Developed income	80.7608	9.40871	28.5197	22.9216	9.14923
y2090	SUR	Developing country	1.8456	2.27323	1.84552	1.84549	2.24317
y2090	GUF	Developing country	0.20992	0.668773	0.210007	0.20999	0.663607
y2090	SGS	Developing country	1e-15	1e-15	1e-15	1e-15	0
y2090	MAR	Developing country	33.4026	33.3999	33.3932	33.4004	33.3665
y2090	TUN	Developing country	4.80214	4.72104	4.80552	4.80171	4.80169
y2090	SAU	Developing country	6.40989	6.0181	6.44756	6.44701	6.32053
y2090	ISR	Developing country	1.23742	1.23742	1.23742	1.23742	1.23742
y2090	JOR	Developing country	0.672618	0.672618	0.672618	0.672618	0.672618
y2090	LBN	Developing country	1.37232	1.37232	1.37217	1.37267	1.37232
y2090	SYR	Developing country	4.77004	4.77002	4.76881	4.77004	4.77
y2090	IRQ	Developing country	5.55818	5.55764	5.55204	5.55793	5.55734
y2090	YEM	Developing country	4.75894	4.65885	4.77024	4.76848	4.73903
y2090	KWT	Developing country	0.172524	0.172524	0.172524	0.172524	0.172524
y2090	QAT	Developing country	0.00375983	0.00375983	0.00375983	0.00375983	0.00375983
y2090	OMN	Developing country	0.167924	0.140214	0.170566	0.170566	0.163368
y2090	ARE	Developed income	0.0854712	0.0854712	0.0854712	0.0853718	0.0854712
y2090	PAK	Developing country	86.9208	87.6986	88.2048	88.3716	87.1366
y2090	CAN	Developed income	69.474	69.5994	82.4755	69.4736	69.4845
y2090	PRI	Developing country	0.786359	0.249088	0.307243	0.30219	0.235194
y2090	AUS	Developed income	22.436	21.7837	37.0154	31.563	20.8235
y2090	JPN	Developing country	30.7276	31.9275	31.8782	31.9625	31.9273
y2090	NZL	Developing country	13.1792	13.1364	12.6333	13.1339	13.0993
y2090	IDN	Developing country	118.905	112.552	112.035	112.008	124.233
y2090	MYS	Developing country	20.5566	18.6402	18.4992	18.489	22.0827
y2090	SGP	Developing country	0.0620988	0.0555649	0.0550837	0.0550487	0.0673029
y2090	BRN	Developed income	0.109625	0.0980905	0.0972412	0.0971793	0.118812
y2090	PHL	Developing country	28.2184	26.5821	27.8396	28.1037	28.7802
y2090	TLS	Developing country	1.0256	1.02723	1.02027	1.02725	1.27371
y2090	KOR	Developing country	7.04329	8.02599	7.92378	7.10714	8.02094
y2090	PNG	Developing country	5.9333	6.16839	5.9846	5.97671	6.73045
y2090	SLB	Developing country	0.0887299	0.079394	0.0787065	0.0786564	0.0961659
y2090	NCL	Developing country	0.186508	0.161822	0.214514	0.21405	0.11529
y2090	VUT	Developing country	0.0502639	0.0449752	0.0445858	0.0445574	0.0544762
y2090	FJI	Developing country	0.35962	0.327902	0.325567	0.325396	0.384882
y2090	REU	Developing country	0.0113192	0.011274	0.0112408	0.00990346	0.0111326
y2090	LKA	Developing country	18.603	20.119	19.2244	19.2242	20.6694
y2090	BGD	Developing country	59.727	63.1425	60.5447	60.7539	64.2265
y2090	BTN	Developing country	0.364562	0.368944	0.359768	0.34677	0.40306
y2100	SEN	Developing country	20.1001	8.18964	21.0562	21.6081	13.6446
y2100	GMB	Developing country	0.0820308	0.0714788	0.0817224	0.0822222	0.0906763
y2100	MRT	Developing country	5.60207	3.96379	4.83628	4.57826	4.33314
y2100	ESH	Developing country	2.6e-14	2.1e-14	2.6e-14	2.6e-14	2.4e-14
y2100	GNB	Developing country	0.528686	0.459323	0.526578	0.529563	0.541229
y2100	GIN	Developing country	9.74231	8.68569	9.42255	9.22894	9.11455
y2100	SLE	Developing country	8.69172	4.42366	6.22521	4.44329	4.4229
y2100	MLI	Developing country	38.6981	8.24497	27.1421	20.8071	13.1728
y2100	LBR	Developing country	9.04333	4.31859	6.30078	4.31579	4.32705
y2100	CIV	Developing country	30.8087	38.1368	35.1896	38.406	38.1297
y2100	BFA	Developing country	24.6447	4.5048	17.7078	13.8958	8.52674
y2100	GHA	Developing country	21.8945	24.6248	23.587	24.8451	24.8525
y2100	TGO	Developing country	5.34504	7.48865	6.48354	7.2353	7.31005
y2100	NER	Developing country	62.8298	45.6574	74.7151	81.6076	60.6281
y2100	BEN	Developing country	4.56961	4.52757	4.89396	5.10601	5.47911
y2100	DZA	Developing country	3.33319	3.22806	3.33251	3.30332	3.24311
y2100	NGA	Developing country	94.4746	72.2366	116.04	126.338	95.0368
y2100	CMR	Developing country	40.7868	18.405	38.5977	35.3789	25.6306
y2100	GAB	Developing country	2.15489	2.148	2.15336	2.15277	2.15637
y2100	GNQ	Developing country	0.703297	0.565782	0.627037	0.569119	0.611846
y2100	NAM	Developing country	2.64775	2.42571	2.5033	2.4356	2.3468
y2100	AGO	Developing country	8.93087	7.85672	8.33767	8.5212	7.86062
y2100	COG	Developing country	5.3644	2.93059	3.956	2.93487	2.93795
y2100	COD	Developing country	35.1979	32.039	32.337	32.3385	31.3909
y2100	LBY	Developing country	8.77193	8.55443	8.77165	8.77116	8.69637
y2100	TCD	Developing country	88.135	5.10042	56.4761	55.525	14.1578
y2100	CAF	Developing country	19.043	3.0866	12.9795	15.7053	4.22534
y2100	ZAF	Developing country	40.1669	39.3232	39.3345	39.2971	39.4668
y2100	BWA	Developing country	2.19217	2.18389	2.1975	2.19156	2.19009
y2100	ZMB	Developing country	7.9535	7.86996	7.87212	7.90824	7.10963
y2100	SDN	Developing country	48.3147	41.2694	45.4996	44.9459	43.7939
y2100	ZWE	Developing country	8.87119	9.1482	9.1589	9.1455	9.10221
y2100	LSO	Developing country	1.00163	1.00107	1.00102	1.12018	1.00027
y2100	BDI	Developing country	1.63368	1.75677	1.7074	1.66245	1.75546
y2100	RWA	Developing country	0.951343	1.05966	1.01589	0.97682	1.05907
y2100	TZA	Developing country	15.6141	15.4423	15.4654	15.5707	10.6418
y2100	UGA	Developing country	9.0647	9.48687	9.3135	9.15868	9.48445
y2100	MOZ	Developing country	8.26948	8.68948	8.71663	8.71733	8.67135
y2100	SWZ	Developing country	0.166976	0.164031	0.16403	0.16403	0.164775
y2100	MWI	Developing country	0.959454	0.92449	0.925262	0.94699	0.962368
y2100	ETH	Developing country	22.969	21.1612	22.9284	22.6028	21.9552
y2100	EGY	Developing country	41.6187	39.8678	41.4709	41.5105	40.9807
y2100	KEN	Developing country	20.0375	19.6002	19.7489	19.6682	19.9971
y2100	ERI	Developing country	4.41562	3.73861	4.07988	3.94263	3.81904
y2100	SOM	Developing country	26.4568	22.0936	26.3699	26.3699	21.6224
y2100	DJI	Developing country	0.00682862	0.00598421	0.00646141	0.00646018	0.00652771
y2100	MDG	Developing country	14.5921	13.3893	13.9157	14.4248	13.8589
y2100	MUS	Developing country	0	0	0	0	0
y2100	ATF	Developing country	0	0	0	0	0
y2100	CHN	Developing country	485.226	438.56	444.558	440.833	438.868
y2100	IND	Developing country	736.714	727.168	725.604	726.959	727.115
y2100	NPL	Developing country	21.2765	23.2132	22.1677	22.0497	23.1358
y2100	MNG	Developing country	1.56151	1.28574	1.58652	1.56101	1.26423
y2100	MMR	Developing country	94.281	82.7239	102.375	104.885	63.0595
y2100	LAO	Developing country	59.958	66.8869	64.9536	64.9574	65.357
y2100	THA	Developing country	88.6252	83.3008	94.5211	98.2273	74.5046
y2100	KHM	Developing country	28.7495	25.3904	31.2205	32.1328	19.7055
y2100	VNM	Developing country	95.7711	105.538	100.149	99.8062	105.818
y2100	RUS	Developing country	166.01	165.886	166.1	166.004	161.944
y2100	PRK	Developing country	6.95789	7.04509	6.99098	6.48847	7.03774
y2100	GRL	Developed income	1.09284	1.09284	1.09284	1.09284	1.09284
y2100	ISL	Developing country	0.932242	0.932043	0.932176	0.932176	0.931926
y2100	ESP	Developed income	25.5551	23.5718	23.9671	23.7574	22.502
[truncated: 113 more rows]

## Sheet: Global-level
Year	BaU	EAT	HUS	MED	VEG
2020	4455.12	4448.13	4448.13	4448.13	4448.13
2025	4554.03	4563.71	4591.79	4573.18	4546.61
2030	4643.82	4547.45	4666.15	4690.06	4525.04
2035	4642.31	4475.78	4738.68	4710.86	4427.91
2040	4655.82	4541.86	4727.38	4711.4	4374.93
2045	4796.03	4536.9	4808.64	4782.6	4335.29
2050	5151.86	4574.75	5074.41	4904.54	4480.4
2055	5170.64	4541.85	5070.81	4966.76	4447.81
2060	5175.64	4465.23	5074.76	4999.75	4428.83
2070	5203.03	4412.76	4950.44	5023.53	4339.93
2080	5181.13	4388.79	4884.2	4907.59	4316.13
2090	4979.72	4185.13	4673.14	4653.01	4093.28
2100	4741.11	4002.32	4440.07	4445.59	3910.13
