# Supplementary material for: Transitioning to healthy and sustainable diets has high environmental and affordability trade-offs for developing countries
Source: Research Square preprint supplement (doi:10.21203/rs.3.rs-3278140/v1), 2023-08-29
Supplement: Supplementary file 4 [file 542e52931a5579459e2cc61d.xlsx]

## Sheet: Country-level
Year	Region	Income-group	BaU	EAT	HUS	MED	VEG
y2025	SEN	Developing country	4.27779	4.27779	4.27772	4.28607	4.27755
y2025	GMB	Developing country	0.0921121	0.0921115	0.0921153	0.0921153	0.0921094
y2025	MRT	Developing country	1.09265	1.09335	1.09089	1.1409	1.09087
y2025	ESH	Developing country	3.1e-14	3.1e-14	3.1e-14	3.1e-14	3.1e-14
y2025	GNB	Developing country	0.543074	0.54307	0.543093	0.543092	0.543058
y2025	GIN	Developing country	5.46484	5.46482	5.46506	5.46528	5.46468
y2025	SLE	Developing country	1.36224	1.36225	1.36231	1.36249	1.3622
y2025	MLI	Developing country	6.53029	6.53024	6.53041	6.54412	6.53007
y2025	LBR	Developing country	1.3677	1.3677	1.36776	1.36794	1.36766
y2025	CIV	Developing country	12.7363	12.7364	12.7369	12.7386	12.736
y2025	BFA	Developing country	4.85322	4.85316	4.85337	4.85336	4.85307
y2025	GHA	Developing country	8.75179	8.75182	8.75193	8.75299	8.75155
y2025	TGO	Developing country	2.66362	2.66363	2.66374	2.66398	2.66355
y2025	NER	Developing country	19.9178	17.6494	20.8358	21.0467	20.8354
y2025	BEN	Developing country	2.52108	2.52101	2.52122	2.52134	2.52092
y2025	DZA	Developing country	3.33136	3.33118	3.33146	3.33146	3.33089
y2025	NGA	Developing country	41.6613	41.6612	41.6625	41.6636	41.6604
y2025	CMR	Developing country	11.8305	11.8304	11.8308	11.8313	11.8302
y2025	GAB	Developing country	2.03105	2.03102	2.03111	2.03111	2.03098
y2025	GNQ	Developing country	0.55857	0.558557	0.558582	0.558582	0.558549
y2025	NAM	Developing country	0.812143	0.811537	0.811622	0.812029	0.809291
y2025	AGO	Developing country	3.47553	3.40137	3.37288	3.4086	3.37296
y2025	COG	Developing country	2.45973	2.45968	2.45977	2.45979	2.45962
y2025	COD	Developing country	23.1668	23.1696	23.1308	23.1603	23.1255
y2025	LBY	Developing country	10.3439	10.3439	10.344	10.344	10.3439
y2025	TCD	Developing country	4.39792	4.39786	4.39797	4.40121	4.39774
y2025	CAF	Developing country	4.63677	4.63726	4.63549	4.63742	4.63536
y2025	ZAF	Developing country	25.1066	24.4872	24.6178	24.8571	24.2568
y2025	BWA	Developing country	0.511487	0.51147	0.511488	0.511489	0.511441
y2025	ZMB	Developing country	1.24443	1.05745	1.05914	1.0648	1.05855
y2025	SDN	Developing country	28.586	28.4934	28.5234	28.5008	28.4894
y2025	ZWE	Developing country	3.64156	3.41067	3.41124	3.50183	3.41036
y2025	LSO	Developing country	0.135299	0.135291	0.133269	0.133368	0.135278
y2025	BDI	Developing country	0.7128	0.71944	0.700919	0.722002	0.700612
y2025	RWA	Developing country	0.234735	0.240189	0.224988	0.242275	0.224747
y2025	TZA	Developing country	2.69758	2.62207	2.59905	2.63923	2.60141
y2025	UGA	Developing country	1.96512	2.00766	1.88604	2.02131	1.88708
y2025	MOZ	Developing country	2.00679	1.80655	1.80701	1.84231	1.80631
y2025	SWZ	Developing country	0.0935703	0.0910679	0.0910916	0.0938446	0.0910562
y2025	MWI	Developing country	0.346893	0.562348	0.562575	0.565346	0.562265
y2025	ETH	Developing country	6.57467	6.5709	6.59964	6.42247	6.56788
y2025	EGY	Developing country	47.8737	47.8748	47.8748	47.8748	47.8748
y2025	KEN	Developing country	3.51262	3.5145	3.46738	3.47381	3.47277
y2025	ERI	Developing country	0.447406	0.448891	0.441532	0.44421	0.443652
y2025	SOM	Developing country	3.88412	3.89624	3.89192	3.89193	3.82668
y2025	DJI	Developing country	0.00318155	0.00318154	0.00318156	0.00337677	0.00318153
y2025	MDG	Developing country	8.36345	8.38332	8.01882	8.36094	8.27075
y2025	MUS	Developing country	0	0	0	0	0
y2025	ATF	Developing country	0	0	0	0	0
y2025	CHN	Developing country	711.935	703.774	710.316	705.924	704.238
y2025	IND	Developing country	1289.64	1288.84	1282.69	1284.28	1290.83
y2025	NPL	Developing country	18.3924	19.0038	18.6092	19.3481	18.9095
y2025	MNG	Developing country	1.29818	1.29626	1.29935	1.2998	1.29538
y2025	MMR	Developing country	83.5326	83.7886	88.1898	89.4834	87.169
y2025	LAO	Developing country	43.3004	45.61	44.8842	46.8865	45.3159
y2025	THA	Developing country	121.026	121.277	115.771	118.579	118.855
y2025	KHM	Developing country	27.8391	27.7638	28.6848	29.1731	28.6289
y2025	VNM	Developing country	75.3761	79.3978	76.8576	80.2676	77.9628
y2025	RUS	Developing country	154.138	154.382	154.221	154.221	154.345
y2025	PRK	Developing country	12.6318	12.426	12.5239	12.5272	12.584
y2025	GRL	Developed income	1.08132	1.08132	1.08132	1.08132	1.08132
y2025	ISL	Developing country	0.928358	0.928256	0.928311	0.928245	0.928303
y2025	ESP	Developed income	34.4095	34.333	34.8822	34.8152	34.333
y2025	IRL	Developing country	0.834828	0.834587	0.837608	0.834625	0.834575
y2025	PRT	Developing country	4.80449	4.80449	4.80449	4.80449	4.80449
y2025	GBR	Developed income	5.47935	5.47729	5.48409	5.47946	5.47669
y2025	FRA	Developed income	26.5732	24.0533	42.1532	39.955	24.0533
y2025	BEL	Developed income	0.754775	0.754452	0.754931	0.754849	0.754343
y2025	NLD	Developing country	0.737198	0.736922	0.737305	0.737264	0.736828
y2025	NOR	Developing country	3.45146	3.45105	3.45126	3.45102	3.4512
y2025	LUX	Developing country	0.0363954	0.0363763	0.0364027	0.0363999	0.0363697
y2025	DEU	Developed income	9.72831	9.60511	10.4642	10.3595	9.60358
y2025	CHE	Developed income	0.356486	0.356388	0.356424	0.356405	0.356378
y2025	ITA	Developing country	28.0254	27.7856	29.5087	29.2994	27.7857
y2025	DNK	Developed income	1.64075	1.63989	1.64108	1.64095	1.63959
y2025	AUT	Developed income	2.13195	2.01586	2.84905	2.74757	2.01582
y2025	SWE	Developing country	2.59256	2.5919	2.5985	2.59216	2.59183
y2025	CZE	Developed income	2.62366	2.59918	2.76782	2.74724	2.59875
y2025	HRV	Developing country	1.88547	1.64207	3.39125	3.17884	1.64212
y2025	SVN	Developing country	0.316987	0.273858	0.583794	0.546154	0.273868
y2025	SJM	Developing country	0.073891	0.073891	0.073891	0.073891	0.073891
y2025	POL	Developing country	11.2434	11.2375	11.2462	11.2448	11.2356
y2025	BIH	Developing country	0.915469	0.915121	0.915238	0.915197	0.915048
y2025	HUN	Developing country	7.16783	6.16202	13.3905	12.5128	6.16229
y2025	SVK	Developing country	1.8553	1.75199	2.4924	2.40222	1.75189
y2025	MNE	Developing country	0.17782	0.177752	0.177775	0.177767	0.177738
y2025	SRB	Developing country	3.53874	3.53738	3.53784	3.53768	3.5371
y2025	ALB	Developing country	0.51607	0.515913	0.515966	0.515947	0.51588
y2025	GRC	Developed income	8.42988	8.42988	8.42988	8.42988	8.42988
y2025	MKD	Developing country	0.606074	0.605873	0.605941	0.605917	0.605831
y2025	ROU	Developed income	15.8504	14.2248	25.9067	24.4875	14.2252
y2025	LTU	Developing country	2.34082	2.33959	2.3413	2.34112	2.33917
y2025	LVA	Developing country	0.723445	0.72307	0.723651	0.723529	0.722944
y2025	FIN	Developed income	1.92064	1.92015	1.92698	1.92016	1.92014
y2025	EST	Developed income	0.709098	0.708813	0.710406	0.70905	0.708748
y2025	BGR	Developing country	7.05644	6.55832	10.1379	9.70287	6.55842
y2025	BLR	Developing country	2.70082	2.72063	2.70765	2.70765	2.71804
y2025	TUR	Developing country	18.7653	18.7643	18.7646	18.7645	18.7641
y2025	MDA	Developing country	0.959821	0.969204	0.962957	0.962957	0.96774
y2025	CYP	Developed income	0.159699	0.159699	0.159699	0.159699	0.159699
y2025	IRN	Developing country	32.8799	32.8799	32.8799	32.8799	32.8799
y2025	UKR	Developing country	15.0468	15.1919	15.0955	15.0955	15.1697
y2025	GEO	Developing country	0.520084	0.522829	0.521064	0.521064	0.522549
y2025	ARM	Developing country	0.497949	0.497932	0.49794	0.49794	0.497931
y2025	AZE	Developing country	3.65456	3.65508	3.65472	3.65472	3.65499
y2025	KAZ	Developing country	22.3972	22.3962	22.3967	22.3967	22.3962
y2025	TKM	Developing country	8.65807	8.65824	8.65826	8.65826	8.65826
y2025	UZB	Developing country	19.7555	19.7569	19.7572	19.7571	19.7572
y2025	AFG	Developing country	9.39063	9.27719	9.33109	9.3329	9.36417
y2025	TJK	Developing country	3.70706	3.70491	3.70456	3.70463	3.70455
y2025	KGZ	Developing country	3.67849	3.67843	3.67846	3.67846	3.67843
y2025	MEX	Developing country	121.283	120.994	121.772	121.318	119.773
y2025	USA	Developed income	306.654	306.466	305.971	307.126	305.758
y2025	GTM	Developing country	6.26349	6.1182	6.23559	6.26832	5.58342
y2025	ECU	Developing country	10.1355	10.1375	10.1391	10.1424	10.1536
y2025	SLV	Developing country	1.97584	2.12011	2.16449	2.16034	2.105
y2025	HND	Developing country	5.1905	5.30573	5.38015	5.36637	5.18517
y2025	BLZ	Developing country	0.631102	0.51264	0.550961	0.569208	0.267768
y2025	NIC	Developing country	5.38583	5.50187	5.54764	5.5392	5.4555
y2025	CRI	Developing country	2.4952	2.44872	2.46763	2.47674	2.32869
y2025	CUB	Developing country	9.728	10.1067	9.97776	9.90648	10.9527
y2025	PAN	Developing country	3.98686	3.99899	4.00311	4.00535	3.9737
y2025	PER	Developing country	21.82	21.8478	21.8512	21.8568	21.8702
y2025	COL	Developing country	36.9555	36.8054	36.8738	36.9035	36.4019
y2025	BHS	Developed income	0.0445677	0.0335349	0.0371037	0.0388032	0.0107284
y2025	JAM	Developing country	0.347469	0.34242	0.344058	0.344833	0.332011
y2025	CHL	Developed income	30.0082	30.0067	29.9957	29.9958	30.029
y2025	HTI	Developing country	2.30321	2.45455	2.44231	2.42709	2.63882
y2025	BRA	Developing country	160.366	159.735	159.76	159.751	159.691
y2025	ARG	Developing country	35.5583	35.4966	35.5069	35.5329	35.4272
y2025	VEN	Developing country	41.1657	41.1379	41.1415	41.1397	41.1212
y2025	DOM	Developing country	4.04192	4.09724	4.08937	4.07143	4.21515
y2025	BOL	Developing country	8.14191	8.09235	8.13028	8.12483	7.99366
y2025	PRY	Developing country	3.85981	3.84788	3.8596	3.86031	3.86074
y2025	TTO	Developing country	1.48917	1.48916	1.4891	1.4891	1.48909
y2025	FLK	Developing country	8e-15	8e-15	8e-15	8e-15	8e-15
y2025	GUY	Developing country	11.0128	11.0051	11.0083	11.0086	11.0065
y2025	URY	Developed income	8.25961	8.25893	8.25937	8.25942	8.30355
y2025	SUR	Developing country	1.68118	1.68118	1.68113	1.68114	1.68113
y2025	GUF	Developing country	0.18286	0.182857	0.182853	0.182854	0.182852
y2025	SGS	Developing country	1e-15	1e-15	1e-15	1e-15	1e-15
y2025	MAR	Developing country	37.8428	37.8419	37.8419	37.8419	37.8419
y2025	TUN	Developing country	4.13693	4.13692	4.13693	4.13693	4.13691
y2025	SAU	Developing country	8.0284	8.0284	8.0284	8.0284	8.0284
y2025	ISR	Developing country	0.562569	0.562569	0.562569	0.562569	0.562569
y2025	JOR	Developing country	0.283637	0.283637	0.283637	0.283637	0.283637
y2025	LBN	Developing country	1.09441	1.09441	1.09441	1.09441	1.09441
y2025	SYR	Developing country	2.83774	2.83774	2.83774	2.83774	2.83774
y2025	IRQ	Developing country	4.72021	4.71999	4.71999	4.71999	4.71999
y2025	YEM	Developing country	3.29763	3.29763	3.29763	3.29763	3.29763
y2025	KWT	Developing country	0.137786	0.137786	0.137786	0.137786	0.137786
y2025	QAT	Developing country	0.0116244	0.0116244	0.0116244	0.0116244	0.0116244
y2025	OMN	Developing country	0.190732	0.190732	0.190732	0.190732	0.190732
y2025	ARE	Developed income	0.273208	0.273208	0.273208	0.273208	0.273208
y2025	PAK	Developing country	106.091	105.414	104.634	105.104	105.436
y2025	CAN	Developed income	61.3064	61.284	61.2873	61.2857	61.2805
y2025	PRI	Developing country	0.280494	0.272922	0.275375	0.27654	0.257285
y2025	AUS	Developed income	23.3953	23.389	23.3906	23.3896	23.388
y2025	JPN	Developing country	33.1658	32.8877	32.846	32.8386	32.9975
y2025	NZL	Developing country	11.1194	11.1186	11.1187	11.1186	11.1185
y2025	IDN	Developing country	94.4367	94.5414	94.4734	94.5868	94.5105
y2025	MYS	Developing country	16.6809	16.6796	16.6807	16.6807	16.6794
y2025	SGP	Developing country	0.0478285	0.0478239	0.0478277	0.0478277	0.0478234
y2025	BRN	Developed income	0.0823395	0.0823316	0.0823382	0.0823382	0.0823308
y2025	PHL	Developing country	28.6687	28.7807	28.0456	28.4495	28.4435
y2025	TLS	Developing country	0.852029	0.852029	0.852029	0.852029	0.852029
y2025	KOR	Developing country	12.8865	13.1664	13.0341	13.0297	12.9507
y2025	PNG	Developing country	4.63368	4.76665	4.68543	4.78493	4.71426
y2025	SLB	Developing country	0.0597093	0.0597036	0.0597083	0.0597084	0.059703
y2025	NCL	Developing country	0.0811023	0.0797967	0.105848	0.105313	0.0972624
y2025	VUT	Developing country	0.0379983	0.0379947	0.0379977	0.0379977	0.0379943
y2025	FJI	Developing country	0.276443	0.276273	0.276411	0.276411	0.276241
y2025	REU	Developing country	0.0059304	0.00592996	0.00593137	0.00593135	0.00592931
y2025	LKA	Developing country	13.5418	14.1537	13.7724	14.3299	13.9622
y2025	BGD	Developing country	49.3562	51.6396	49.4379	51.7333	50.483
y2025	BTN	Developing country	0.419028	0.440888	0.430634	0.430289	0.423894
y2030	SEN	Developing country	4.31961	4.08773	4.31958	4.3265	4.31909
y2030	GMB	Developing country	0.0920733	0.0868647	0.0920515	0.0917519	0.0920326
y2030	MRT	Developing country	1.11626	1.52567	1.11628	1.16243	1.11618
y2030	ESH	Developing country	3.3e-14	3.2e-14	3.4e-14	3.2e-14	3.2e-14
y2030	GNB	Developing country	0.54324	0.525705	0.543211	0.542789	0.543109
y2030	GIN	Developing country	5.53435	5.46726	5.53486	5.53818	5.53373
y2030	SLE	Developing country	1.41775	1.41508	1.41798	1.41824	1.4176
y2030	MLI	Developing country	6.55052	6.47413	6.55109	6.57134	6.5502
y2030	LBR	Developing country	1.42065	1.41997	1.42104	1.42098	1.42048
y2030	CIV	Developing country	13.1895	13.1919	13.1919	13.1982	13.1883
y2030	BFA	Developing country	4.87665	4.71479	4.87627	4.87123	4.87542
y2030	GHA	Developing country	9.04478	8.96489	9.04575	9.04304	9.0434
y2030	TGO	Developing country	2.76031	2.73557	2.76066	2.76015	2.75996
y2030	NER	Developing country	20.9325	18.0672	20.9327	21.127	20.9315
y2030	BEN	Developing country	2.49575	2.57387	2.603	2.21241	2.60186
y2030	DZA	Developing country	3.15454	3.16181	3.16874	3.14323	3.14249
y2030	NGA	Developing country	42.6167	41.9464	42.6197	42.6139	42.6124
y2030	CMR	Developing country	12.0746	12.0481	12.076	12.0759	12.0733
y2030	GAB	Developing country	2.03882	2.04976	2.03907	2.03904	2.0385
y2030	GNQ	Developing country	0.559719	0.558348	0.560089	0.559963	0.559624
y2030	NAM	Developing country	0.829115	0.980053	0.828498	0.830067	0.828227
y2030	AGO	Developing country	3.45885	3.47135	3.52048	3.55045	3.39662
y2030	COG	Developing country	2.47459	2.48195	2.47487	2.47484	2.47421
y2030	COD	Developing country	23.4197	23.2943	23.6149	23.5495	23.3882
y2030	LBY	Developing country	10.4581	10.5561	10.5877	10.3534	10.3532
y2030	TCD	Developing country	4.51586	4.54525	4.51608	4.51907	4.51526
y2030	CAF	Developing country	4.65135	4.66031	4.65421	4.66102	4.64618
y2030	ZAF	Developing country	25.6272	24.1843	25.7066	25.4859	25.3484
y2030	BWA	Developing country	0.506808	0.614909	0.506914	0.506915	0.506604
y2030	ZMB	Developing country	1.29615	1.24899	1.13805	1.12531	1.12464
y2030	SDN	Developing country	29.145	28.343	28.9122	28.8989	29.2791
y2030	ZWE	Developing country	3.76509	3.8497	3.76947	3.84471	3.64319
y2030	LSO	Developing country	0.146821	0.146177	0.146883	0.146883	0.146727
y2030	BDI	Developing country	0.746689	0.70577	0.796294	0.803694	0.696731
y2030	RWA	Developing country	0.261719	0.229753	0.302362	0.30841	0.220337
y2030	TZA	Developing country	2.76513	2.73047	2.70768	2.7683	2.60663
y2030	UGA	Developing country	2.18497	1.93481	2.50035	2.54834	1.88995
y2030	MOZ	Developing country	2.09762	2.09398	1.98736	2.10859	1.93626
y2030	SWZ	Developing country	0.0981686	0.0994626	0.103065	0.102294	0.0992138
y2030	MWI	Developing country	0.360441	0.419037	0.599404	0.595895	0.595252
y2030	ETH	Developing country	7.71192	7.53673	7.73217	7.6827	7.72087
y2030	EGY	Developing country	48.7022	49.2112	49.667	47.9183	47.9182
y2030	KEN	Developing country	3.75251	3.68323	3.8075	3.81793	3.69372
y2030	ERI	Developing country	0.46231	0.480572	0.462396	0.464738	0.462149
y2030	SOM	Developing country	3.92304	2.94276	3.92317	3.92317	3.92261
y2030	DJI	Developing country	0.00310994	0.00455285	0.00310996	0.00328408	0.00310984
y2030	MDG	Developing country	8.81424	8.2779	8.82112	8.94897	8.28012
y2030	MUS	Developing country	0	0	0	0	0
y2030	ATF	Developing country	0	0	0	0	0
y2030	CHN	Developing country	785.978	728.765	750.884	754.259	734.547
y2030	IND	Developing country	1263.81	1231.83	1236.26	1233.18	1245.25
y2030	NPL	Developing country	18.8345	22.496	21.4397	22.1128	21.4297
y2030	MNG	Developing country	1.32422	1.3157	1.3294	1.32889	1.31215
y2030	MMR	Developing country	89.5905	93.2644	96.8446	96.3999	90.6737
y2030	LAO	Developing country	45.6154	57.5855	53.8778	55.6891	51.498
y2030	THA	Developing country	119.901	114.482	116.102	115.567	117.526
y2030	KHM	Developing country	29.2643	29.8378	30.8377	30.6842	29.2656
y2030	VNM	Developing country	78.0738	96.654	90.5474	93.6292	88.5068
y2030	RUS	Developing country	156.187	155.209	156.356	156.349	156.142
y2030	PRK	Developing country	12.5097	11.0527	12.4211	12.4349	14.6486
y2030	GRL	Developed income	1.07946	1.07946	1.07946	1.07945	1.07946
y2030	ISL	Developing country	0.901785	0.90203	0.901515	0.901305	0.901622
y2030	ESP	Developed income	32.7021	32.6552	33.1676	33.1015	32.626
y2030	IRL	Developing country	0.818891	0.824697	0.821869	0.818865	0.818763
y2030	PRT	Developing country	4.51706	4.51623	4.51706	4.51706	4.51706
y2030	GBR	Developed income	5.33344	5.67773	5.33726	5.33253	5.3278
y2030	FRA	Developed income	26.0013	24.0546	41.3044	39.1439	23.505
y2030	BEL	Developed income	0.730108	0.793319	0.73004	0.729943	0.72908
y2030	NLD	Developing country	0.711961	0.766428	0.711872	0.711819	0.711076
y2030	NOR	Developing country	3.35838	3.36096	3.3574	3.35664	3.3577
y2030	LUX	Developing country	0.0352449	0.0390243	0.0352387	0.0352351	0.0351835
y2030	DEU	Developed income	9.40197	10.1985	10.1201	10.0172	9.27022
y2030	CHE	Developed income	0.354753	0.357542	0.35469	0.354638	0.354582
y2030	ITA	Developing country	26.982	26.7677	28.4361	28.2308	26.7453
y2030	DNK	Developed income	1.58352	1.75332	1.58324	1.58308	1.58076
y2030	AUT	Developed income	2.09257	2.0299	2.79739	2.69756	1.9772
y2030	SWE	Developing country	2.54531	2.58607	2.55156	2.54518	2.54458
y2030	CZE	Developed income	2.53864	2.7683	2.67933	2.65905	2.51162
y2030	HRV	Developing country	1.8554	1.63735	3.33686	3.12777	1.61423
y2030	SVN	Developing country	0.312703	0.274116	0.575639	0.538525	0.269897
y2030	SJM	Developing country	0.0730089	0.0730089	0.0730089	0.0730089	0.0730089
y2030	POL	Developing country	10.863	12.0115	10.8617	10.86	10.8443
y2030	BIH	Developing country	0.92626	0.937848	0.926164	0.926076	0.925641
y2030	HUN	Developing country	7.04813	6.13076	13.1608	12.2981	6.05329
y2030	SVK	Developing country	1.81466	1.79511	2.44016	2.35152	1.71169
y2030	MNE	Developing country	0.180093	0.182377	0.180075	0.180058	0.179972
y2030	SRB	Developing country	3.5773	3.62249	3.57693	3.57659	3.57489
y2030	ALB	Developing country	0.518814	0.524068	0.518772	0.518733	0.518534
y2030	GRC	Developed income	8.08493	8.0842	8.08493	8.08493	8.08493
y2030	MKD	Developing country	0.611113	0.61783	0.611059	0.61101	0.610755
y2030	ROU	Developed income	15.5402	14.0971	25.4244	24.0287	13.931
y2030	LTU	Developing country	2.26372	2.50647	2.26333	2.26309	2.25978
y2030	LVA	Developing country	0.702927	0.776436	0.702875	0.702736	0.701731
y2030	FIN	Developed income	1.87758	1.87901	1.88439	1.87755	1.87748
y2030	EST	Developed income	0.692121	0.72978	0.693391	0.692018	0.691494
y2030	BGR	Developing country	6.89662	6.45743	9.92577	9.49785	6.40344
y2030	BLR	Developing country	2.75324	2.67021	2.76867	2.76867	2.75237
y2030	TUR	Developing country	18.5382	18.5693	18.538	18.5377	18.5366
y2030	MDA	Developing country	0.976039	0.938703	0.983152	0.983152	0.975763
y2030	CYP	Developed income	0.14894	0.148676	0.14894	0.14894	0.14894
y2030	IRN	Developing country	33.2839	33.281	33.2839	33.2839	33.2846
y2030	UKR	Developing country	15.3002	14.7197	15.4105	15.4106	15.2959
y2030	GEO	Developing country	0.529204	0.517071	0.531414	0.531414	0.529063
y2030	ARM	Developing country	0.498616	0.499903	0.497952	0.497624	0.497431
y2030	AZE	Developing country	3.63197	3.64759	3.62375	3.61929	3.61654
y2030	KAZ	Developing country	22.437	22.4677	22.4173	22.4084	22.401
y2030	TKM	Developing country	8.74552	8.77267	8.73322	8.72666	8.7236
y2030	UZB	Developing country	19.6636	19.7757	19.6141	19.5872	19.5747
y2030	AFG	Developing country	9.43026	9.30479	9.38138	9.38848	9.52918
y2030	TJK	Developing country	3.69659	3.71488	3.68463	3.67979	3.67738
y2030	KGZ	Developing country	3.65837	3.67463	3.65063	3.64664	3.64466
y2030	MEX	Developing country	139.945	123.603	128.084	121.471	116.701
y2030	USA	Developed income	301.081	298.258	297.753	299.559	287.548
y2030	GTM	Developing country	7.01197	5.95549	6.1646	6.67538	5.55156
y2030	ECU	Developing country	10.2662	10.3658	10.2317	10.2198	10.2348
y2030	SLV	Developing country	2.52371	1.82718	1.68286	2.14835	2.1404
y2030	HND	Developing country	6.09019	5.33674	5.39543	5.46317	5.16475
y2030	BLZ	Developing country	0.76188	0.515936	0.665031	0.790512	0.269802
y2030	NIC	Developing country	6.04704	5.51335	5.5727	5.71699	5.55635
y2030	CRI	Developing country	2.57805	2.4408	2.53578	2.59506	2.32989
y2030	CUB	Developing country	9.53214	9.98265	9.69775	9.00735	10.8873
y2030	PAN	Developing country	4.04015	3.95071	4.04999	4.06209	3.98523
y2030	PER	Developing country	22.3006	21.976	21.8809	21.9431	21.9066
y2030	COL	Developing country	37.4882	37.3119	37.1996	37.3026	36.3774
y2030	BHS	Developed income	0.0567189	0.0338739	0.0476979	0.0593865	0.0108838
y2030	JAM	Developing country	0.355148	0.343575	0.351025	0.356337	0.334241
y2030	CHL	Developed income	31.5579	29.4004	29.5366	29.5375	29.5539
y2030	HTI	Developing country	2.41704	2.3145	2.14256	2.24913	2.65097
y2030	BRA	Developing country	161.217	162.308	162.439	162.231	162.363
y2030	ARG	Developing country	37.639	36.3472	35.9715	35.9984	35.6059
y2030	VEN	Developing country	41.6991	41.0392	41.5727	41.4141	41.4233
y2030	DOM	Developing country	4.25592	4.00517	4.08144	3.8492	4.15867
y2030	BOL	Developing country	8.50825	8.35286	8.47144	8.35658	8.16965
y2030	PRY	Developing country	3.95268	3.92477	3.91492	3.91622	3.91017
y2030	TTO	Developing country	1.49887	1.45194	1.49886	1.49886	1.49878
y2030	FLK	Developing country	9e-15	9e-15	9e-15	9e-15	9e-15
y2030	GUY	Developing country	11.088	10.9619	11.0839	11.0842	11.0815
y2030	URY	Developed income	8.37741	8.37491	8.37537	8.37569	8.43151
y2030	SUR	Developing country	1.69484	1.75488	1.69483	1.69483	1.69477
y2030	GUF	Developing country	0.186367	0.265706	0.186363	0.186363	0.186353
y2030	SGS	Developing country	1e-15	1e-15	1e-15	1e-15	1e-15
y2030	MAR	Developing country	37.9675	37.9765	37.9672	37.966	37.966
y2030	TUN	Developing country	4.58042	4.94581	5.24958	4.03869	4.03862
y2030	SAU	Developing country	7.83064	7.75054	7.83068	7.83068	7.8589
y2030	ISR	Developing country	0.625763	0.625763	0.625763	0.625763	0.625763
y2030	JOR	Developing country	0.317209	0.317209	0.317209	0.317209	0.317209
y2030	LBN	Developing country	1.12749	1.12228	1.12749	1.12749	1.12749
y2030	SYR	Developing country	2.94753	2.95108	2.94753	2.94753	2.94753
y2030	IRQ	Developing country	4.76862	4.75894	4.76841	4.76841	4.76841
y2030	YEM	Developing country	3.31395	3.30356	3.31396	3.31396	3.32146
y2030	KWT	Developing country	0.148807	0.148672	0.148807	0.148807	0.148807
y2030	QAT	Developing country	0.0100312	0.0100312	0.0100312	0.0100312	0.0100312
y2030	OMN	Developing country	0.185062	0.184713	0.185065	0.185065	0.187099
y2030	ARE	Developed income	0.211087	0.210303	0.211087	0.211087	0.211087
y2030	PAK	Developing country	105.516	104.095	104.531	104.616	106.268
y2030	CAN	Developed income	61.5909	61.5256	61.5299	61.5188	61.4839
y2030	PRI	Developing country	0.2897	0.273036	0.283518	0.291512	0.258306
y2030	AUS	Developed income	22.7718	23.1278	22.7553	22.751	22.7393
y2030	JPN	Developing country	32.6582	32.2481	32.3105	32.3255	32.8803
y2030	NZL	Developing country	11.2035	11.1994	11.2013	11.2009	11.1997
y2030	IDN	Developing country	95.0087	96.0907	95.3845	95.4734	95.2662
y2030	MYS	Developing country	16.9414	17.0937	16.9413	16.9413	16.9373
y2030	SGP	Developing country	0.0488852	0.0493991	0.0488846	0.0488847	0.0488713
y2030	BRN	Developed income	0.0844537	0.0853415	0.0844527	0.0844529	0.0844297
y2030	PHL	Developing country	28.8123	28.7083	28.5934	28.6002	28.727
y2030	TLS	Developing country	0.831024	0.825279	0.831024	0.831024	0.831024
y2030	KOR	Developing country	12.98	11.744	13.1041	13.0862	15.0954
y2030	PNG	Developing country	4.75653	5.33787	5.13079	5.22157	5.05033
y2030	SLB	Developing country	0.0621485	0.0628019	0.0621478	0.062148	0.0621309
y2030	NCL	Developing country	0.104451	0.127896	0.135981	0.135627	0.111416
y2030	VUT	Developing country	0.0389287	0.039338	0.0389283	0.0389284	0.0389177
y2030	FJI	Developing country	0.284342	0.286378	0.284591	0.284455	0.2838
y2030	REU	Developing country	0.00645025	0.00644763	0.0064532	0.00645322	0.00644547
y2030	LKA	Developing country	13.9866	17.1745	16.0377	16.5527	15.5404
y2030	BGD	Developing country	50.3856	61.2674	57.2066	59.0522	55.7651
y2030	BTN	Developing country	0.431009	0.420815	0.441028	0.439455	0.462452
y2035	SEN	Developing country	4.35384	4.25427	4.27985	4.05371	4.27853
y2035	GMB	Developing country	0.0922568	0.0891374	0.0922342	0.091927	0.0921852
y2035	MRT	Developing country	1.13796	1.36413	1.13787	1.13111	1.1376
y2035	ESH	Developing country	3.4e-14	3.3e-14	3.3e-14	3.3e-14	3.1e-14
y2035	GNB	Developing country	0.544732	0.539856	0.544698	0.544233	0.544418
y2035	GIN	Developing country	5.66747	5.69612	5.66829	5.6713	5.66515
y2035	SLE	Developing country	1.51859	1.52093	1.51909	1.51934	1.5181
y2035	MLI	Developing country	6.57688	6.64498	6.52446	6.34324	6.52191
y2035	LBR	Developing country	1.51648	1.52027	1.5176	1.51743	1.51597
y2035	CIV	Developing country	14.0267	14.09	14.0319	14.038	14.0224
y2035	BFA	Developing country	4.90652	4.81931	4.90615	4.75551	4.90386
y2035	GHA	Developing country	9.57638	9.54642	9.57893	9.57607	9.57273
y2035	TGO	Developing country	2.92707	2.92197	2.92794	2.92744	2.92612
y2035	NER	Developing country	20.8306	18.4333	18.5263	16.8918	19.7569
y2035	BEN	Developing country	2.60682	2.7085	2.71922	2.30608	2.71626
y2035	DZA	Developing country	3.10356	3.08901	3.09673	3.0904	3.06873
y2035	NGA	Developing country	44.0374	41.6384	43.9101	42.9968	43.7054
y2035	CMR	Developing country	12.3716	12.3504	12.3751	12.3247	12.3678
y2035	GAB	Developing country	2.03535	2.04762	2.03597	2.0359	2.03443
y2035	GNQ	Developing country	0.558702	0.563809	0.559895	0.559585	0.558436
y2035	NAM	Developing country	0.840654	0.898777	0.843638	0.847444	0.833999
y2035	AGO	Developing country	3.23351	3.37101	3.41496	3.38002	3.29557
y2035	COG	Developing country	2.48225	2.4912	2.48299	2.48291	2.48122
y2035	COD	Developing country	23.4781	23.7398	23.8274	23.8561	23.5383
y2035	LBY	Developing country	10.6673	10.5599	10.6024	10.5435	10.3472
y2035	TCD	Developing country	4.59977	4.6121	4.59781	4.46555	4.5957
y2035	CAF	Developing country	4.62815	4.64026	4.63062	4.63269	4.62527
y2035	ZAF	Developing country	25.0737	21.9708	24.1837	23.9149	24.8868
y2035	BWA	Developing country	0.501791	0.563287	0.511937	0.511929	0.500944
y2035	ZMB	Developing country	1.32858	1.36618	1.38894	1.3793	1.32952
y2035	SDN	Developing country	30.1692	29.2912	29.3524	29.2819	29.7977
y2035	ZWE	Developing country	3.51692	3.2269	3.53637	3.60466	3.61557
y2035	LSO	Developing country	0.162777	0.16265	0.162911	0.162913	0.162505
y2035	BDI	Developing country	0.752798	0.759255	0.793848	0.745783	0.731441
y2035	RWA	Developing country	0.267877	0.274776	0.301418	0.262076	0.249998
y2035	TZA	Developing country	2.72285	2.61801	2.70943	2.68619	2.6525
y2035	UGA	Developing country	2.24802	2.29973	2.50834	2.20297	2.13933
y2035	MOZ	Developing country	2.04694	1.96769	2.07548	2.18546	2.07231
y2035	SWZ	Developing country	0.091705	0.0828293	0.0906312	0.0899367	0.0952374
y2035	MWI	Developing country	0.347301	0.282542	0.29339	0.290671	0.376848
y2035	ETH	Developing country	8.51768	8.60651	8.43837	8.23348	8.52854
y2035	EGY	Developing country	50.1121	49.1604	49.6298	49.1865	47.7247
y2035	KEN	Developing country	3.94448	3.9471	3.93518	3.80179	3.9264
y2035	ERI	Developing country	0.48664	0.495666	0.486821	0.48381	0.486184
y2035	SOM	Developing country	3.98693	3.84259	3.84366	3.84367	3.94046
y2035	DJI	Developing country	0.00300422	0.00372621	0.00300425	0.00300426	0.00300392
y2035	MDG	Developing country	8.77377	8.59822	9.28993	9.13721	8.4565
y2035	MUS	Developing country	0	0	0	0	0
y2035	ATF	Developing country	0	0	0	0	0
y2035	CHN	Developing country	802.581	758.109	765.76	775.045	752.421
y2035	IND	Developing country	1225.96	1171.28	1290.14	1288.95	1190.61
y2035	NPL	Developing country	19.946	26.6779	24.7048	26.5057	21.1459
y2035	MNG	Developing country	1.35377	1.33379	1.36345	1.36297	1.32191
y2035	MMR	Developing country	94.8668	96.6298	101.721	101.938	89.0973
y2035	LAO	Developing country	50.0004	70.0174	64.441	68.0952	53.9432
y2035	THA	Developing country	116.436	108.965	110.044	110.957	112.422
y2035	KHM	Developing country	30.3329	30.2805	31.5856	31.5146	28.5886
y2035	VNM	Developing country	84.1243	116.43	106.87	114.048	90.9485
y2035	RUS	Developing country	157.584	157.267	157.562	157.556	156.855
y2035	PRK	Developing country	12.2443	11.1059	12.1294	14.191	11.0589
y2035	GRL	Developed income	1.07668	1.07667	1.07667	1.07667	1.07668
y2035	ISL	Developing country	0.88162	0.880861	0.880856	0.880702	0.881309
y2035	ESP	Developed income	31.4048	31.3708	31.861	31.7965	31.3304
y2035	IRL	Developing country	0.799544	0.80563	0.799442	0.799437	0.796339
y2035	PRT	Developing country	4.29403	4.29326	4.29403	4.29403	4.29336
y2035	GBR	Developed income	5.18403	5.71763	5.17974	5.17943	5.16999
y2035	FRA	Developed income	25.3801	23.6765	40.3604	38.2434	22.9156
y2035	BEL	Developed income	0.705112	0.804044	0.704331	0.704274	0.703312
y2035	NLD	Developing country	0.687688	0.772848	0.687017	0.686968	0.68617
y2035	NOR	Developing country	3.28692	3.28401	3.28416	3.28358	3.28488
y2035	LUX	Developing country	0.0340027	0.0399275	0.033956	0.0339526	0.0338971
y2035	DEU	Developed income	9.0651	10.3739	9.75717	9.65703	8.92416
y2035	CHE	Developed income	0.352319	0.351892	0.352156	0.352087	0.351358
y2035	ITA	Developing country	26.1689	25.9613	27.5896	27.3889	25.9361
y2035	DNK	Developed income	1.52427	1.78986	1.52217	1.52202	1.51953
y2035	AUT	Developed income	2.05222	2.01574	2.7419	2.64436	1.93762
y2035	SWE	Developing country	2.49405	2.55156	2.49348	2.49344	2.48648
y2035	CZE	Developed income	2.44848	2.82025	2.58329	2.56358	2.41874
y2035	HRV	Developing country	1.81769	1.6062	3.27035	3.06514	1.57963
y2035	SVN	Developing country	0.30685	0.269433	0.565087	0.528607	0.264522
y2035	SJM	Developing country	0.072093	0.072093	0.072093	0.072093	0.072093
y2035	POL	Developing country	10.4699	12.2676	10.4557	10.4547	10.4372
y2035	BIH	Developing country	0.93039	0.92907	0.930183	0.929989	0.926672
y2035	HUN	Developing country	6.89692	5.99756	12.8838	12.0381	5.91636
y2035	SVK	Developing country	1.77092	1.7951	2.38213	2.29559	1.66827
y2035	MNE	Developing country	0.181009	0.18075	0.18097	0.180932	0.180258
y2035	SRB	Developing country	3.5906	3.58548	3.58982	3.58907	3.57973
y2035	ALB	Developing country	0.519131	0.518554	0.519042	0.518956	0.517684
y2035	GRC	Developed income	7.82714	7.82646	7.82714	7.82714	7.82655
y2035	MKD	Developing country	0.612529	0.61177	0.612415	0.612305	0.610562
y2035	ROU	Developed income	15.2032	13.8107	24.8869	23.5189	13.615
y2035	LTU	Developing country	2.18282	2.56316	2.17982	2.1796	2.17604
y2035	LVA	Developing country	0.680305	0.795803	0.679393	0.679327	0.678176
y2035	FIN	Developed income	1.83053	1.82592	1.83044	1.83044	1.82358
y2035	EST	Developed income	0.672978	0.730829	0.672498	0.672464	0.670567
y2035	BGR	Developing country	6.74386	6.32173	9.71143	9.2922	6.25688
y2035	BLR	Developing country	2.8036	2.78036	2.80323	2.80323	2.75513
y2035	TUR	Developing country	18.3858	18.3822	18.3852	18.3847	18.3768
y2035	MDA	Developing country	0.993684	0.983893	0.993683	0.993683	0.972855
y2035	CYP	Developed income	0.140894	0.140645	0.140894	0.140894	0.14068
y2035	IRN	Developing country	33.6857	33.6807	33.6833	33.6836	33.6857
y2035	UKR	Developing country	15.5739	15.4208	15.5738	15.5739	15.2499
y2035	GEO	Developing country	0.537432	0.533838	0.537363	0.537364	0.530262
y2035	ARM	Developing country	0.496373	0.49519	0.496112	0.495812	0.493643
y2035	AZE	Developing country	3.58602	3.57319	3.58338	3.57931	3.5653
y2035	KAZ	Developing country	22.3134	22.276	22.3014	22.2933	22.143
y2035	TKM	Developing country	8.75195	8.73641	8.74893	8.7431	8.73675
y2035	UZB	Developing country	19.4054	19.343	19.394	19.3709	19.3438
y2035	AFG	Developing country	9.45226	9.40516	9.38876	9.44907	9.38103
y2035	TJK	Developing country	3.65729	3.64086	3.65216	3.64561	3.63845
y2035	KGZ	Developing country	3.61339	3.60242	3.61113	3.60749	3.59796
y2035	MEX	Developing country	139.699	132.552	132.223	113.444	95.5544
y2035	USA	Developed income	294.004	279.901	291.745	291.123	279.51
y2035	GTM	Developing country	7.12956	5.52078	6.716	7.15054	4.75417
y2035	ECU	Developing country	10.4568	10.6544	10.3642	10.367	9.98506
y2035	SLV	Developing country	2.44331	1.73098	1.89681	2.27993	2.00392
y2035	HND	Developing country	6.1166	5.13028	5.84906	5.98134	4.82419
y2035	BLZ	Developing country	0.841848	0.465899	0.813188	0.908774	0.206863
y2035	NIC	Developing country	6.11292	5.46173	5.85132	6.00399	5.36621
y2035	CRI	Developing country	2.62626	2.36763	2.6125	2.65933	2.10336
y2035	CUB	Developing country	9.2535	9.50293	9.10704	8.21568	8.12379
y2035	PAN	Developing country	4.07271	3.93587	4.07021	4.08051	3.74106
y2035	PER	Developing country	22.3214	22.2684	22.2517	22.1176	20.511
y2035	COL	Developing country	37.9255	37.5397	37.7757	37.789	35.3067
y2035	BHS	Developed income	0.0642193	0.0306164	0.0615505	0.0704556	0.00839249
y2035	JAM	Developing country	0.359321	0.320059	0.358051	0.362088	0.277876
y2035	CHL	Developed income	30.9599	28.9204	30.4008	29.0371	28.912
y2035	HTI	Developing country	2.31244	2.11566	2.10257	2.19436	2.17095
y2035	BRA	Developing country	166.632	167.424	165.65	165.059	164.412
y2035	ARG	Developing country	37.3795	36.093	37.0868	35.7029	35.1022
y2035	VEN	Developing country	42.1017	42.0001	41.9714	41.6567	41.5961
y2035	DOM	Developing country	4.20943	3.98865	3.99747	3.5604	3.08339
y2035	BOL	Developing country	8.72339	8.61917	8.68735	8.60064	8.17511
y2035	PRY	Developing country	4.03101	4.01092	4.0339	4.03441	3.96574
y2035	TTO	Developing country	1.51154	1.46551	1.51158	1.51158	1.51149
y2035	FLK	Developing country	9e-15	9e-15	9e-15	9e-15	8e-15
y2035	GUY	Developing country	11.1895	11.0672	11.1858	11.1861	11.1618
y2035	URY	Developed income	8.39111	8.52372	8.37708	8.37754	8.43173
y2035	SUR	Developing country	1.71561	1.77472	1.71563	1.71563	1.71491
y2035	GUF	Developing country	0.190627	0.270017	0.190625	0.190625	0.190142
y2035	SGS	Developing country	1e-15	1e-15	1e-15	1e-15	0
y2035	MAR	Developing country	38.0712	38.165	38.07	38.0698	38.069
y2035	TUN	Developing country	5.61975	4.92617	5.28478	4.98092	3.96798
y2035	SAU	Developing country	7.91434	7.82513	7.82537	7.83705	7.91427
y2035	ISR	Developing country	0.631872	0.631872	0.631872	0.631872	0.631872
y2035	JOR	Developing country	0.322643	0.322643	0.322643	0.322643	0.322643
y2035	LBN	Developing country	1.05954	1.05954	1.05954	1.05954	1.05954
y2035	SYR	Developing country	3.02109	3.02477	3.02109	3.02109	3.02109
y2035	IRQ	Developing country	4.8407	4.83763	4.84049	4.84049	4.84049
y2035	YEM	Developing country	3.37853	3.35497	3.35505	3.35813	3.37852
y2035	KWT	Developing country	0.1745	0.174364	0.1745	0.1745	0.1745
y2035	QAT	Developing country	0.00857116	0.00857116	0.00857116	0.00857116	0.00857116
y2035	OMN	Developing country	0.185856	0.179459	0.179478	0.180315	0.185856
y2035	ARE	Developed income	0.153684	0.153689	0.153684	0.153684	0.153684
y2035	PAK	Developing country	103.791	103.067	102.626	103.552	103.121
y2035	CAN	Developed income	62.0459	61.903	61.9175	61.8967	61.8351
y2035	PRI	Developing country	0.295046	0.249851	0.293186	0.299283	0.204895
y2035	AUS	Developed income	22.3063	22.9489	33.7795	26.3476	22.249
y2035	JPN	Developing country	31.9926	31.2142	30.2517	30.2496	32.722
y2035	NZL	Developing country	11.3202	11.3138	11.3157	11.3149	11.2749
y2035	IDN	Developing country	96.1465	97.607	96.8049	97.0004	96.3065
y2035	MYS	Developing country	17.1159	17.2632	17.1116	17.1166	17.1076
y2035	SGP	Developing country	0.0496046	0.0501036	0.0495903	0.0496071	0.0495767
y2035	BRN	Developed income	0.0860267	0.086892	0.0860018	0.0860309	0.0859782
y2035	PHL	Developing country	28.6331	28.5928	28.3298	28.5769	28.3405
y2035	TLS	Developing country	0.8328	0.827083	0.827053	0.827053	0.8328
y2035	KOR	Developing country	12.9678	11.808	13.1324	15.3371	11.8555
y2035	PNG	Developing country	4.98311	5.96555	5.66338	5.86483	5.19793
y2035	SLB	Developing country	0.0643543	0.0650016	0.0643357	0.0643575	0.0643181
y2035	NCL	Developing country	0.12945	0.151194	0.164347	0.161611	0.117573
y2035	VUT	Developing country	0.0396026	0.0400009	0.0395911	0.0396045	0.0395803
y2035	FJI	Developing country	0.29089	0.292548	0.29142	0.291362	0.28908
y2035	REU	Developing country	0.007028	0.00702066	0.00703417	0.00703427	0.00701466
y2035	LKA	Developing country	15.0224	20.4953	18.7726	19.7623	16.2539
y2035	BGD	Developing country	53.2454	72.2886	65.9928	69.7246	57.558
y2035	BTN	Developing country	0.441118	0.422966	0.454536	0.493681	0.424534
y2040	SEN	Developing country	4.31298	4.26531	4.19056	4.10054	4.17396
y2040	GMB	Developing country	0.0924992	0.0893563	0.0924869	0.0921777	0.0923932
y2040	MRT	Developing country	1.14863	1.32345	1.145	1.18179	1.1441
y2040	ESH	Developing country	3.4e-14	3.5e-14	3.4e-14	3.4e-14	3.2e-14
y2040	GNB	Developing country	0.546579	0.541586	0.546606	0.546132	0.546062
y2040	GIN	Developing country	5.84486	5.87261	5.84653	5.84945	5.84052
y2040	SLE	Developing country	1.65391	1.65606	1.65476	1.65497	1.65292
y2040	MLI	Developing country	6.56968	6.66523	6.46785	6.40569	6.45103
y2040	LBR	Developing country	1.64477	1.64495	1.64597	1.6491	1.64368
y2040	CIV	Developing country	15.157	15.216	15.165	15.1733	15.148
y2040	BFA	Developing country	4.93871	4.84209	4.85964	4.79246	4.84611
y2040	GHA	Developing country	10.2963	10.265	10.3009	10.2978	10.2895
y2040	TGO	Developing country	3.15173	3.14626	3.15321	3.15264	3.14989
y2040	NER	Developing country	18.9808	18.421	17.3044	17.1492	18.1866
y2040	BEN	Developing country	2.61397	2.4292	2.66374	2.43165	2.84937
y2040	DZA	Developing country	3.04336	3.03067	3.03661	3.04218	3.01649
y2040	NGA	Developing country	45.6664	43.5261	45.2734	44.8535	41.315
y2040	CMR	Developing country	12.6946	12.6639	12.672	12.6551	12.6566
y2040	GAB	Developing country	2.02393	2.03404	2.02458	2.02592	2.02213
y2040	GNQ	Developing country	0.555358	0.554192	0.55615	0.561884	0.554725
y2040	NAM	Developing country	0.845512	0.916093	0.851047	0.863772	0.828397
y2040	AGO	Developing country	3.44743	3.38923	3.44355	3.50628	3.36974
y2040	COG	Developing country	2.4841	2.49062	2.48491	2.48647	2.48208
y2040	COD	Developing country	24.2178	24.1305	24.4903	24.5415	23.6855
y2040	LBY	Developing country	10.5766	10.4863	10.5099	10.5642	10.3302
y2040	TCD	Developing country	4.65473	4.65765	4.58308	4.52919	4.57098
y2040	CAF	Developing country	4.57495	4.58553	4.57266	4.57325	4.5658
y2040	ZAF	Developing country	24.3063	22.0199	24.7601	22.4117	21.4749
y2040	BWA	Developing country	0.500797	0.557115	0.500704	0.500666	0.509611
y2040	ZMB	Developing country	1.44806	1.48627	1.51698	1.52048	1.48749
y2040	SDN	Developing country	30.9386	29.3962	29.6076	29.1034	29.2085
y2040	ZWE	Developing country	3.65295	3.31074	3.8616	4.24394	3.32887
y2040	LSO	Developing country	0.182856	0.182566	0.183052	0.183046	0.182328
y2040	BDI	Developing country	0.870951	0.818902	0.845892	0.812494	0.807031
y2040	RWA	Developing country	0.366853	0.326051	0.346323	0.31903	0.314235
y2040	TZA	Developing country	2.90275	2.68211	2.83987	2.71504	2.74569
y2040	UGA	Developing country	3.03767	2.71733	2.87685	2.6653	2.66603
y2040	MOZ	Developing country	2.26611	2.18162	2.39674	3.26887	2.06864
y2040	SWZ	Developing country	0.0932716	0.0841286	0.0987441	0.0859925	0.0887273
y2040	MWI	Developing country	0.373822	0.285867	0.315251	0.284792	0.29509
y2040	ETH	Developing country	9.02039	8.70274	8.88208	8.91811	9.40706
y2040	EGY	Developing country	49.5578	48.7338	49.0609	49.4616	47.7175
y2040	KEN	Developing country	4.1122	4.00691	4.00552	3.99368	4.22117
y2040	ERI	Developing country	0.517263	0.523141	0.515869	0.516518	0.514554
y2040	SOM	Developing country	3.94917	3.94748	3.94938	3.94938	3.94688
y2040	DJI	Developing country	0.00288016	0.00339401	0.00288017	0.00301773	0.00287959
y2040	MDG	Developing country	9.35114	8.73415	9.38123	8.59024	9.48036
y2040	MUS	Developing country	0	0	0	0	0
y2040	ATF	Developing country	0	0	0	0	0
y2040	CHN	Developing country	808.483	741.63	772.214	776.493	735.86
y2040	IND	Developing country	1194.47	1133.33	1275.2	1271.6	1169.5
y2040	NPL	Developing country	20.232	26.2353	24.6013	24.9928	24.4955
y2040	MNG	Developing country	1.38235	1.34878	1.39698	1.39297	1.32985
y2040	MMR	Developing country	99.28	94.7668	101.105	98.9187	87.2123
y2040	LAO	Developing country	51.9911	69.7751	67.1061	67.05	64.0593
y2040	THA	Developing country	116.483	101.446	102.389	101.052	104.041
y2040	KHM	Developing country	31.3694	29.2776	31.2383	30.4285	27.4982
y2040	VNM	Developing country	86.6062	115.503	108.848	109.884	107.363
y2040	RUS	Developing country	158.01	157.496	157.984	157.759	157.006
y2040	PRK	Developing country	11.8889	10.7639	8.35692	10.1038	10.7949
y2040	GRL	Developed income	1.07215	1.07215	1.07215	1.07215	1.07215
y2040	ISL	Developing country	0.868495	0.86796	0.868055	0.868055	0.867875
y2040	ESP	Developed income	30.3919	30.3579	30.8392	30.7759	30.3214
y2040	IRL	Developing country	0.784309	0.79028	0.784176	0.784179	0.781918
y2040	PRT	Developing country	4.11048	4.10974	4.11048	4.11048	4.1092
y2040	GBR	Developed income	5.05893	5.58336	5.05294	5.05311	4.31946
y2040	FRA	Developed income	24.8163	23.1268	39.472	37.398	22.2295
y2040	BEL	Developed income	0.68318	0.780602	0.682084	0.682116	0.691669
y2040	NLD	Developing country	0.666756	0.750501	0.665814	0.665841	0.674136
y2040	NOR	Developing country	3.24029	3.23751	3.23902	3.23897	3.23355
y2040	LUX	Developing country	0.032878	0.0387198	0.0328123	0.0328142	0.0333928
y2040	DEU	Developed income	8.75865	10.0458	9.43017	9.33341	8.76496
y2040	CHE	Developed income	0.350483	0.349005	0.350894	0.35083	0.34426
y2040	ITA	Developing country	25.5614	25.3563	26.9487	26.7524	25.2507
y2040	DNK	Developed income	1.47054	1.73182	1.4676	1.46768	1.49356
y2040	AUT	Developed income	2.01963	1.98325	2.69456	2.59899	1.2262
y2040	SWE	Developing country	2.45641	2.51305	2.45563	2.45566	3.70134
y2040	CZE	Developed income	2.36661	2.73255	2.49708	2.47814	2.37779
y2040	HRV	Developing country	1.78153	1.57187	3.20494	3.00356	1.54209
y2040	SVN	Developing country	0.301116	0.263971	0.554561	0.518704	0.258462
y2040	SJM	Developing country	0.0711351	0.0711351	0.0711351	0.0711351	0.0711351
y2040	POL	Developing country	10.1142	11.8846	10.0942	10.0948	10.2697
y2040	BIH	Developing country	0.932641	0.926734	0.934659	0.934387	0.907005
y2040	HUN	Developing country	6.74871	5.85821	12.608	11.7791	5.76073
y2040	SVK	Developing country	1.73251	1.75601	2.33001	2.24534	1.34171
y2040	MNE	Developing country	0.181535	0.180371	0.181934	0.18188	0.176444
y2040	SRB	Developing country	3.59628	3.5733	3.60415	3.60309	3.50356
y2040	ALB	Developing country	0.51856	0.515927	0.519473	0.519351	0.465366
y2040	GRC	Developed income	7.6368	7.63614	7.6368	7.6368	7.63566
y2040	MKD	Developing country	0.612527	0.609109	0.6137	0.613543	0.598042
y2040	ROU	Developed income	14.8999	13.5205	24.3813	23.0399	13.2769
y2040	LTU	Developing country	2.10956	2.48438	2.10534	2.10546	2.14259
y2040	LVA	Developing country	0.659938	0.774142	0.658651	0.658689	0.669911
y2040	FIN	Developed income	1.79353	1.78894	1.79344	1.79344	2.57423
y2040	EST	Developed income	0.656701	0.713884	0.656028	0.656048	0.660644
y2040	BGR	Developing country	6.61738	6.19921	9.52303	9.11193	6.12899
y2040	BLR	Developing country	2.81203	2.77523	2.81133	2.79387	2.74817
y2040	TUR	Developing country	18.2123	18.1964	18.2177	18.217	13.7241
y2040	MDA	Developing country	0.995839	0.98014	0.995683	0.987689	0.968147
y2040	CYP	Developed income	0.134396	0.134158	0.134396	0.134396	0.133987
y2040	IRN	Developing country	33.7935	33.7868	33.7895	33.7895	33.7937
y2040	UKR	Developing country	15.6061	15.3612	15.6036	15.4796	15.1756
y2040	GEO	Developing country	0.539246	0.533667	0.539126	0.536605	0.529852
y2040	ARM	Developing country	0.49292	0.491282	0.49275	0.492354	0.486782
y2040	AZE	Developing country	3.53214	3.51985	3.53127	3.52536	3.4835
y2040	KAZ	Developing country	22.1113	22.0357	22.0984	22.0882	21.7365
y2040	TKM	Developing country	8.69174	8.68211	8.69173	8.68408	8.65052
y2040	UZB	Developing country	19.0814	19.0435	19.0823	19.0526	18.9133
y2040	AFG	Developing country	9.41716	9.38925	9.34838	9.37697	9.40464
y2040	TJK	Developing country	3.60953	3.59435	3.60657	3.59639	3.56617
y2040	KGZ	Developing country	3.562	3.55247	3.56137	3.55637	3.52432
y2040	MEX	Developing country	144.676	116.324	151.278	144.958	92.2746
y2040	USA	Developed income	286.962	273.695	283.916	284.425	273.103
y2040	GTM	Developing country	7.32492	4.96623	7.20853	7.36492	4.76694
y2040	ECU	Developing country	12.58	10.3573	12.5973	11.1898	10.0749
y2040	SLV	Developing country	2.72808	1.70983	2.55987	2.62631	2.03312
y2040	HND	Developing country	6.41856	4.91383	6.65082	6.33465	4.84855
y2040	BLZ	Developing country	0.840393	0.393224	0.809396	0.899832	0.206226
y2040	NIC	Developing country	6.34085	5.41327	6.42033	6.27346	5.32068
y2040	CRI	Developing country	2.61918	2.25796	2.60399	2.6464	1.98451
y2040	CUB	Developing country	9.18504	7.87474	9.3067	8.92639	8.05748
y2040	PAN	Developing country	4.06582	3.90332	4.06246	4.07177	3.44552
y2040	PER	Developing country	23.2381	20.5704	23.2091	23.333	20.3039
y2040	COL	Developing country	38.8585	36.0838	38.8175	38.2656	32.7974
y2040	BHS	Developed income	0.0641919	0.0258643	0.0613059	0.0697828	0.00841405
y2040	JAM	Developing country	0.358851	0.285355	0.357446	0.360438	0.281932
y2040	CHL	Developed income	30.3055	28.1217	29.8342	29.6616	28.1353
y2040	HTI	Developing country	2.41126	1.88011	2.3519	2.31703	2.16845
y2040	BRA	Developing country	186.329	170.484	186.482	182.031	167.128
y2040	ARG	Developing country	41.3833	35.2813	41.407	41.3418	34.1794
y2040	VEN	Developing country	42.5901	40.6234	42.5855	42.5953	40.2951
y2040	DOM	Developing country	4.22403	3.29864	4.2772	4.15724	3.05807
y2040	BOL	Developing country	8.89467	8.6175	8.93287	8.76846	8.35321
y2040	PRY	Developing country	4.22284	4.05986	4.21054	4.2234	4.17021
y2040	TTO	Developing country	1.52606	1.46632	1.52601	1.52601	1.43654
y2040	FLK	Developing country	9e-15	8e-15	9e-15	9e-15	8e-15
y2040	GUY	Developing country	11.3002	11.1671	11.2984	11.2958	10.6588
y2040	URY	Developed income	8.36334	8.39832	8.25875	8.29544	8.3064
y2040	SUR	Developing country	1.74201	2.19392	1.74196	1.74196	2.08188
y2040	GUF	Developing country	0.195226	0.696676	0.195212	0.195212	0.609049
y2040	SGS	Developing country	1e-15	0	1e-15	1e-15	0
y2040	MAR	Developing country	37.937	38.0313	37.935	37.936	37.9353
y2040	TUN	Developing country	5.55876	4.95476	5.21494	5.49482	4.28889
y2040	SAU	Developing country	7.80923	7.67636	7.67678	7.67675	7.81768
y2040	ISR	Developing country	0.604328	0.604328	0.604328	0.604328	0.604328
y2040	JOR	Developing country	0.310842	0.310842	0.310842	0.310842	0.310842
y2040	LBN	Developing country	0.881138	0.881139	0.881138	0.881138	0.881138
y2040	SYR	Developing country	3.03991	3.04366	3.03991	3.03991	3.03991
y2040	IRQ	Developing country	4.89604	4.89301	4.89584	4.89584	4.89584
y2040	YEM	Developing country	3.47827	3.44346	3.44357	3.44358	3.48049
y2040	KWT	Developing country	0.195434	0.195298	0.195434	0.195434	0.195434
y2040	QAT	Developing country	0.00625675	0.00625675	0.00625675	0.00625675	0.00625675
y2040	OMN	Developing country	0.180005	0.170549	0.170575	0.170578	0.180614
y2040	ARE	Developed income	0.103026	0.103031	0.103026	0.103026	0.103026
y2040	PAK	Developing country	101.796	100.317	99.4151	99.7186	101.023
y2040	CAN	Developed income	62.6756	62.3314	62.4701	62.4393	62.2624
y2040	PRI	Developing country	0.294283	0.21594	0.29225	0.297278	0.205698
y2040	AUS	Developed income	22.0418	22.615	40.9113	32.0497	19.6164
y2040	JPN	Developing country	31.4427	29.8007	31.6109	30.5905	30.7702
y2040	NZL	Developing country	11.4641	11.4505	11.4568	11.4557	11.4122
y2040	IDN	Developing country	97.8905	99.5919	98.9899	98.9755	98.8063
y2040	MYS	Developing country	17.2191	17.4776	17.3377	17.3376	17.3235
y2040	SGP	Developing country	0.0500311	0.0509068	0.0504328	0.0504327	0.0503849
y2040	BRN	Developed income	0.0870986	0.0886233	0.0877981	0.0877979	0.0877146
y2040	PHL	Developing country	28.7183	27.8428	27.6741	27.5295	27.8712
y2040	TLS	Developing country	0.861423	0.849665	0.849635	0.849635	0.861423
y2040	KOR	Developing country	12.9537	11.7194	9.02426	10.9877	11.6697
y2040	PNG	Developing country	5.10609	5.99836	5.7945	5.818	5.74465
y2040	SLB	Developing country	0.0662137	0.0673727	0.0667454	0.0667452	0.066682
y2040	NCL	Developing country	0.144534	0.158908	0.181481	0.174309	0.127918
y2040	VUT	Developing country	0.040045	0.040746	0.0403666	0.0403665	0.0403282
y2040	FJI	Developing country	0.295737	0.299004	0.298892	0.297692	0.294817
y2040	REU	Developing country	0.00776444	0.00774917	0.00777316	0.00777289	0.00773917
y2040	LKA	Developing country	15.4856	20.4318	19.5672	19.563	19.0815
y2040	BGD	Developing country	54.3308	70.8374	67.5391	67.5088	66.5498
y2040	BTN	Developing country	0.453272	0.431689	0.381261	0.418025	0.424639
y2045	SEN	Developing country	4.33492	4.28106	4.13506	4.27512	4.18723
y2045	GMB	Developing country	0.092371	0.0892063	0.092358	0.0920503	0.0922205
y2045	MRT	Developing country	1.15009	1.31837	1.14693	2.25531	1.13435
y2045	ESH	Developing country	3.5e-14	3.5e-14	3.4e-14	3.4e-14	3.3e-14
y2045	GNB	Developing country	0.546479	0.541319	0.546501	0.546032	0.545697
y2045	GIN	Developing country	6.03289	6.05892	6.03467	6.03766	6.01675
y2045	SLE	Developing country	1.80989	1.81163	1.81086	1.81109	1.8008
y2045	MLI	Developing country	6.59857	6.6858	6.43	6.49017	6.46918
y2045	LBR	Developing country	1.79156	1.79138	1.79318	1.79438	1.7823
y2045	CIV	Developing country	16.4542	16.5095	16.4634	16.4705	16.3742
y2045	BFA	Developing country	4.95424	4.85167	4.82294	4.81256	4.85561
y2045	GHA	Developing country	11.1196	11.0857	11.1248	11.1219	11.067
y2045	TGO	Developing country	3.40591	3.39973	3.40759	3.40706	3.39309
y2045	NER	Developing country	18.514	18.5566	17.0439	17.5874	18.0851
y2045	BEN	Developing country	2.75592	2.56457	2.57324	2.56856	2.991
y2045	DZA	Developing country	3.03615	2.96279	2.96315	2.96426	2.93795
y2045	NGA	Developing country	47.5138	45.6094	45.2592	45.2219	43.3995
y2045	CMR	Developing country	13.0092	12.9739	12.9692	12.9692	12.9455
y2045	GAB	Developing country	2.00659	2.01574	2.00726	2.00777	2.00344
y2045	GNQ	Developing country	0.549164	0.547888	0.550488	0.552682	0.547793
y2045	NAM	Developing country	1.9461	2.17875	2.58432	2.59977	1.92783
y2045	AGO	Developing country	4.19836	4.32821	5.82688	5.99721	4.17686
y2045	COG	Developing country	2.48078	2.48627	2.48165	2.48224	2.47629
y2045	COD	Developing country	24.3636	24.2869	24.6259	24.6462	23.8882
y2045	LBY	Developing country	10.4135	10.4196	10.4522	10.4648	10.3954
y2045	TCD	Developing country	4.68571	4.68271	4.56581	4.59225	4.59532
y2045	CAF	Developing country	4.47014	4.48332	4.47413	4.47226	4.46288
y2045	ZAF	Developing country	38.7317	34.6402	40.493	38.4868	36.0314
y2045	BWA	Developing country	2.27931	2.51175	2.2992	2.2992	2.28013
y2045	ZMB	Developing country	1.59095	1.64863	1.66433	1.68569	1.63379
y2045	SDN	Developing country	38.8161	28.9402	37.6317	31.3685	28.6976
y2045	ZWE	Developing country	6.54269	6.82091	7.40138	8.09481	6.20618
y2045	LSO	Developing country	0.20599	0.205351	0.206162	0.206163	0.205837
y2045	BDI	Developing country	0.914484	0.901955	0.918812	0.896946	0.880475
y2045	RWA	Developing country	0.405541	0.397168	0.409027	0.391185	0.37747
y2045	TZA	Developing country	3.28121	3.17349	3.31927	4.1213	3.23375
y2045	UGA	Developing country	3.36083	3.29223	3.38687	3.43733	3.18783
y2045	MOZ	Developing country	2.57614	3.57604	2.81184	3.9281	2.38787
y2045	SWZ	Developing country	0.0935418	0.081671	0.101996	0.0949829	0.0879881
y2045	MWI	Developing country	0.403404	0.285531	0.340208	0.312634	0.291564
y2045	ETH	Developing country	11.0798	11.0345	10.6749	11.3751	11.3913
y2045	EGY	Developing country	48.623	48.5259	48.4847	48.583	48.4849
y2045	KEN	Developing country	4.63068	4.64653	4.60469	13.5717	4.73651
y2045	ERI	Developing country	0.55113	0.555802	0.548713	2.74814	0.547261
y2045	SOM	Developing country	21.7413	21.7407	21.7414	23.5623	21.7406
y2045	DJI	Developing country	0.00270881	0.00317483	0.00271783	0.00291297	0.00267243
y2045	MDG	Developing country	9.7719	9.10909	9.80223	9.78523	9.43963
y2045	MUS	Developing country	0	0	0	0	0
y2045	ATF	Developing country	0	0	0	0	0
y2045	CHN	Developing country	810.91	731.246	741.211	758.981	725.279
y2045	IND	Developing country	1164.4	1132.59	1222.93	1229.3	1139.24
y2045	NPL	Developing country	21.4074	25.7355	24.4851	24.3109	25.2834
y2045	MNG	Developing country	1.4064	1.35104	1.41297	1.41805	1.33032
y2045	MMR	Developing country	100.33	93.0667	102.686	98.5153	85.0594
y2045	LAO	Developing country	55.679	69.5477	67.3826	67.2805	66.7284
y2045	THA	Developing country	117.672	95.7877	96.7891	94.817	101.623
y2045	KHM	Developing country	31.6674	28.581	31.2909	30.1344	26.7388
y2045	VNM	Developing country	92.5436	114.208	108.504	108.334	111.815
y2045	RUS	Developing country	157.954	157.308	157.898	157.185	152.377
y2045	PRK	Developing country	11.6808	9.56166	8.55906	7.76098	10.5243
y2045	GRL	Developed income	1.06641	1.06641	1.06641	1.06641	1.06641
y2045	ISL	Developing country	0.859083	0.85888	0.859003	0.859003	0.85877
y2045	ESP	Developed income	29.4999	29.4628	29.9389	29.8768	29.4012
y2045	IRL	Developing country	0.776002	0.780817	0.775711	0.775722	0.772184
y2045	PRT	Developing country	3.94487	3.94363	3.94487	3.94487	3.94227
y2045	GBR	Developed income	4.98787	4.65916	4.98124	4.9817	4.16919
y2045	FRA	Developed income	24.3346	22.4124	38.6979	36.665	21.0777
y2045	BEL	Developed income	0.669417	0.755506	0.668242	0.668326	0.664951
y2045	NLD	Developing country	0.653277	0.727211	0.652269	0.652341	0.649622
y2045	NOR	Developing country	3.20752	3.20663	3.20726	3.2075	3.20517
y2045	LUX	Developing country	0.0322221	0.0373918	0.0321516	0.0321567	0.0319692
y2045	DEU	Developed income	8.56827	9.69245	9.22448	9.13045	8.36401
y2045	CHE	Developed income	0.350067	0.349767	0.350089	0.35048	0.349208
y2045	ITA	Developing country	25.0551	24.7757	26.4131	26.2209	24.7006
y2045	DNK	Developed income	1.4293	1.65862	1.42618	1.4264	1.41808
y2045	AUT	Developed income	1.99871	1.26722	2.6605	2.5668	1.16667
y2045	SWE	Developing country	2.43826	3.73888	2.43712	2.43718	3.67872
y2045	CZE	Developed income	2.31682	2.63779	2.44423	2.42587	2.27176
y2045	HRV	Developing country	1.74822	1.53675	3.14504	2.94738	1.44939
y2045	SVN	Developing country	0.295723	0.2582	0.544708	0.509475	0.242462
y2045	SJM	Developing country	0.0702115	0.0702114	0.0702115	0.0702115	0.0702115
y2045	POL	Developing country	9.90352	11.4686	9.88215	9.88368	9.82633
y2045	BIH	Developing country	0.93838	0.937237	0.938523	0.940176	0.935221
y2045	HUN	Developing country	6.61242	5.71831	12.3573	11.5444	5.38645
y2045	SVK	Developing country	1.70659	1.41497	2.29201	2.20908	1.27431
y2045	MNE	Developing country	0.182733	0.182508	0.182762	0.183088	0.182073
y2045	SRB	Developing country	3.61632	3.61188	3.61688	3.62331	3.61134
y2045	ALB	Developing country	0.519735	0.519256	0.5198	0.520545	0.518778
y2045	GRC	Developed income	7.4722	7.47111	7.4722	7.4722	7.47146
y2045	MKD	Developing country	0.614215	0.613536	0.614299	0.615257	0.612768
y2045	ROU	Developed income	14.6304	13.2085	23.93	22.614	12.6144
y2045	LTU	Developing country	2.06586	2.39731	2.06134	2.06166	2.04964
y2045	LVA	Developing country	0.648461	0.749757	0.647075	0.647174	0.64338
y2045	FIN	Developed income	1.77132	2.55642	1.77088	1.77088	2.55856
y2045	EST	Developed income	0.647504	0.698011	0.646715	0.646767	0.643798
y2045	BGR	Developing country	6.50649	6.0837	9.35622	8.95296	5.89765
y2045	BLR	Developing country	2.78969	2.74946	2.78686	2.72899	2.71406
y2045	TUR	Developing country	18.0068	18.0037	18.0071	18.0116	18.0004
y2045	MDA	Developing country	0.98584	0.969623	0.984714	0.958259	0.951928
y2045	CYP	Developed income	0.128676	0.12828	0.128676	0.128676	0.128116
y2045	IRN	Developing country	33.3866	33.3717	33.3795	33.3795	33.3849
y2045	UKR	Developing country	15.4483	15.1952	15.4308	15.0204	14.9217
y2045	GEO	Developing country	0.536688	0.53056	0.536221	0.527909	0.52565
y2045	ARM	Developing country	0.488953	0.485722	0.48944	0.488998	0.312029
y2045	AZE	Developing country	3.47322	3.44561	3.48239	3.4744	2.20367
y2045	KAZ	Developing country	21.876	21.7291	21.8772	21.8665	14.4546
y2045	TKM	Developing country	8.58384	8.55627	8.59919	8.59006	7.68789
y2045	UZB	Developing country	18.7112	18.6005	18.7745	18.7386	15.1921
y2045	AFG	Developing country	9.42743	9.37612	9.24828	9.33905	9.39333
y2045	TJK	Developing country	3.55266	3.52146	3.56111	3.55076	2.73102
y2045	KGZ	Developing country	3.50509	3.48288	3.51327	3.50769	2.61644
y2045	MEX	Developing country	146.202	109.004	149.838	138.057	90.4488
y2045	USA	Developed income	282.067	270.781	276.478	276.963	270.393
y2045	GTM	Developing country	7.39801	5.3526	7.22487	6.82372	4.39993
y2045	ECU	Developing country	12.7346	10.3712	12.752	12.769	10.0563
y2045	SLV	Developing country	2.8831	1.74852	2.63457	2.39805	2.04676
y2045	HND	Developing country	6.57992	5.11122	6.74567	5.98875	4.39951
y2045	BLZ	Developing country	0.831788	0.440719	0.801055	0.826864	0.205167
y2045	NIC	Developing country	6.45909	5.46494	6.48535	6.06802	5.37174
y2045	CRI	Developing country	2.60378	2.31875	2.58852	2.56348	1.8331
y2045	CUB	Developing country	9.08051	8.42459	9.19622	8.29031	7.99745
y2045	PAN	Developing country	4.05016	3.90097	4.0464	4.038	3.04627
y2045	PER	Developing country	23.3076	20.4315	23.271	23.0777	20.4743
y2045	COL	Developing country	39.5311	36.2879	39.265	39.0636	28.7816
y2045	BHS	Developed income	0.0635525	0.0290086	0.0606917	0.0641398	0.0084055
y2045	JAM	Developing country	0.358071	0.310763	0.356639	0.340723	0.284669
y2045	CHL	Developed income	29.3863	27.2121	28.9371	28.5847	27.1972
y2045	HTI	Developing country	2.45585	2.03398	2.36321	2.11892	2.15919
y2045	BRA	Developing country	226.128	173.422	215.054	203.685	170.706
y2045	ARG	Developing country	78.162	35.0708	58.7185	42.5156	33.6625
y2045	VEN	Developing country	42.8839	40.9067	42.877	48.5504	43.443
y2045	DOM	Developing country	4.19536	3.37558	4.23462	3.87662	3.03674
y2045	BOL	Developing country	8.97743	8.58657	9.02492	8.64005	8.53237
y2045	PRY	Developing country	4.66603	4.15749	4.46386	4.32653	4.01114
y2045	TTO	Developing country	1.54152	1.46465	1.54142	1.57737	0.328658
y2045	FLK	Developing country	9e-15	8e-15	9e-15	9e-15	8e-15
y2045	GUY	Developing country	11.4371	11.1354	11.431	11.5792	7.61309
y2045	URY	Developed income	32.6775	8.33133	19.6126	9.50454	8.23973
y2045	SUR	Developing country	1.77184	2.21988	1.77175	1.77178	3.19524
y2045	GUF	Developing country	0.199315	0.708413	0.199294	0.199298	2.33742
y2045	SGS	Developing country	1e-15	0	1e-15	1e-15	0
y2045	MAR	Developing country	37.5501	37.6443	37.5483	37.5431	37.5487
y2045	TUN	Developing country	5.43169	5.3274	5.33301	5.3982	5.33927
y2045	SAU	Developing country	6.69354	6.32389	6.47763	6.47757	6.58249
y2045	ISR	Developing country	0.586142	0.586142	0.586142	0.586142	0.586142
y2045	JOR	Developing country	0.303379	0.303379	0.303379	0.303379	0.303379
y2045	LBN	Developing country	0.830232	0.830233	0.830232	0.830232	0.830232
y2045	SYR	Developing country	3.09554	3.09943	3.09554	3.09554	3.09552
y2045	IRQ	Developing country	4.93864	4.93564	4.93845	4.93713	4.93814
y2045	YEM	Developing country	3.67907	3.58335	3.62314	3.62314	3.65354
y2045	KWT	Developing country	0.138934	0.138852	0.138934	0.138934	0.138934
y2045	QAT	Developing country	0.00460689	0.00460689	0.00460689	0.00460689	0.00460689
y2045	OMN	Developing country	0.176432	0.150237	0.161125	0.161126	0.17052
y2045	ARE	Developed income	0.0727832	0.0727862	0.0727832	0.0727832	0.0727832
y2045	PAK	Developing country	100.799	97.9922	97.1559	96.947	99.4649
y2045	CAN	Developed income	63.317	62.9057	63.0614	63.0324	62.8875
y2045	PRI	Developing country	0.293851	0.24027	0.291794	0.277853	0.206828
y2045	AUS	Developed income	21.9412	21.5575	45.021	31.5242	20.8904
y2045	JPN	Developing country	31.1857	31.8607	31.7403	31.4388	30.2269
y2045	NZL	Developing country	11.617	11.5748	11.608	11.6107	11.5755
y2045	IDN	Developing country	101.037	102.54	102	101.956	101.915
y2045	MYS	Developing country	17.4345	17.6998	17.5749	17.5666	17.548
y2045	SGP	Developing country	0.0508023	0.051702	0.0512786	0.0512503	0.0511873
y2045	BRN	Developed income	0.0887399	0.0903115	0.0895719	0.0895224	0.0894125
y2045	PHL	Developing country	29.1221	27.3134	27.1526	26.935	27.8437
y2045	TLS	Developing country	0.907953	0.895577	0.895546	0.90132	0.91374
y2045	KOR	Developing country	12.7297	10.4027	9.24833	8.41181	11.4639
y2045	PNG	Developing country	5.3347	6.02098	5.83906	5.84916	5.93759
y2045	SLB	Developing country	0.0684544	0.0696668	0.0690962	0.0690581	0.0689733
y2045	NCL	Developing country	0.147568	0.165901	0.198171	0.188045	0.126212
y2045	VUT	Developing country	0.0407565	0.0414783	0.0411386	0.0411159	0.0410654
y2045	FJI	Developing country	0.302564	0.305558	0.304829	0.304679	0.300684
y2045	REU	Developing country	0.00856868	0.00854175	0.00857605	0.00857582	0.00851789
y2045	LKA	Developing country	16.6025	20.469	19.622	19.6694	19.957
y2045	BGD	Developing country	57.898	69.8015	66.4418	66.4334	68.9638
y2045	BTN	Developing country	0.450158	0.408022	0.385873	0.371708	0.423782
y2050	SEN	Developing country	22.1268	11.3141	11.5828	19.1254	11.5677
y2050	GMB	Developing country	0.0921236	0.0736075	0.0920997	0.0916027	0.0919127
y2050	MRT	Developing country	4.7872	4.40731	4.31898	4.58548	4.31474
y2050	ESH	Developing country	3.4e-14	3.4e-14	3.5e-14	3.4e-14	3.3e-14
y2050	GNB	Developing country	0.545677	0.447198	0.545635	0.544879	0.544537
y2050	GIN	Developing country	6.16244	5.47886	6.17235	6.17722	6.15858
y2050	SLE	Developing country	1.92298	1.88548	1.93096	1.93135	1.92594
y2050	MLI	Developing country	18.8347	9.2531	9.91645	16.3001	9.89697
y2050	LBR	Developing country	1.89497	1.88461	1.90534	1.90357	1.9134
y2050	CIV	Developing country	17.3671	16.9739	17.4384	17.4471	17.4032
y2050	BFA	Developing country	11.676	4.12531	4.88703	9.74277	4.87135
y2050	GHA	Developing country	11.7983	11.3123	11.8423	11.8376	11.8124
y2050	TGO	Developing country	3.50432	3.54274	3.58765	3.58681	3.57931
y2050	NER	Developing country	99.6974	70.4958	70.6065	91.172	70.5589
y2050	BEN	Developing country	3.04298	2.57564	2.67086	2.83515	3.09908
y2050	DZA	Developing country	2.94414	2.84961	2.96865	2.87231	2.85549
y2050	NGA	Developing country	91.3068	54.5721	54.5189	84.825	53.2004
y2050	CMR	Developing country	15.9653	30.5489	31.2861	32.9606	20.2019
y2050	GAB	Developing country	1.97891	1.98517	1.98033	1.97956	1.98062
y2050	GNQ	Developing country	0.539846	0.535515	0.544619	0.541401	0.567058
y2050	NAM	Developing country	2.34671	2.95019	2.567	2.5665	2.24863
y2050	AGO	Developing country	6.02737	10.8636	6.07957	6.0471	5.96219
y2050	COG	Developing country	2.45936	2.46063	2.46203	2.46113	2.46228
y2050	COD	Developing country	26.3587	26.2435	26.7919	26.6697	26.5602
y2050	LBY	Developing country	10.1453	10.1832	10.2499	10.2432	10.2037
y2050	TCD	Developing country	11.6585	21.5173	22.1554	26.646	11.6071
y2050	CAF	Developing country	4.41567	7.62401	7.73805	7.73628	5.64122
y2050	ZAF	Developing country	46.9317	43.136	44.6483	44.6519	46.3842
y2050	BWA	Developing country	2.25428	2.48062	2.25438	2.25429	2.25395
y2050	ZMB	Developing country	2.35134	2.7099	2.40778	2.39798	2.42934
y2050	SDN	Developing country	40.9075	38.8725	41.4142	39.2945	34.3578
y2050	ZWE	Developing country	7.35161	7.69293	8.07241	8.07316	6.75712
y2050	LSO	Developing country	0.989195	0.467007	0.989214	0.989213	0.98958
y2050	BDI	Developing country	0.981504	0.971148	0.995081	0.974239	0.952862
y2050	RWA	Developing country	0.464899	0.458644	0.475918	0.45894	0.441446
y2050	TZA	Developing country	9.06555	8.85893	8.91434	8.8925	8.98678
y2050	UGA	Developing country	4.87615	4.2442	4.9606	4.82968	4.74769
y2050	MOZ	Developing country	2.97942	4.47196	4.14978	4.14496	2.84406
y2050	SWZ	Developing country	0.107661	0.0992547	0.0994929	0.0998608	0.107273
y2050	MWI	Developing country	0.399756	0.515906	0.327571	0.34535	0.329074
y2050	ETH	Developing country	15.8772	13.751	15.3839	15.384	15.859
y2050	EGY	Developing country	46.9399	47.0818	47.2942	47.2524	47.3717
y2050	KEN	Developing country	17.7799	15.1126	17.6955	17.6703	17.84
y2050	ERI	Developing country	3.8019	3.09537	3.65248	3.75632	3.65099
y2050	SOM	Developing country	23.9281	23.8937	23.9281	23.9281	19.8053
y2050	DJI	Developing country	0.00853468	0.00826259	0.00806871	0.0081871	0.00805827
y2050	MDG	Developing country	10.1494	9.82111	9.77519	10.1306	10.3291
y2050	MUS	Developing country	0	0	0	0	0
y2050	ATF	Developing country	0	0	0	0	0
y2050	CHN	Developing country	805.149	686.793	677.774	712.057	649.052
y2050	IND	Developing country	1138.49	1121.18	1194.18	1193.6	1108.16
y2050	NPL	Developing country	21.7255	26.914	24.5068	24.7527	26.6798
y2050	MNG	Developing country	1.41823	1.35727	1.44081	1.41554	1.33316
y2050	MMR	Developing country	100.845	90.5314	99.5906	95.9809	81.7721
y2050	LAO	Developing country	57.3087	75.964	68.7552	70.7683	73.4448
y2050	THA	Developing country	113.25	93.4263	92.7251	91.0469	98.8948
y2050	KHM	Developing country	31.5338	27.7651	30.2478	29.2549	25.8488
y2050	VNM	Developing country	94.5431	120.984	109.428	111.428	120.408
y2050	RUS	Developing country	157.935	154.875	157.244	157.169	150.756
y2050	PRK	Developing country	11.3634	9.34849	8.21425	7.43274	8.20864
y2050	GRL	Developed income	1.06267	1.06267	1.06267	1.06267	1.06267
y2050	ISL	Developing country	0.85611	0.855988	0.856135	0.856134	0.855859
y2050	ESP	Developed income	28.6603	28.6237	29.0927	29.0326	26.1811
y2050	IRL	Developing country	0.776479	0.783959	0.776363	0.77669	0.769117
y2050	PRT	Developing country	3.79357	3.79239	3.79357	3.79357	3.5582
y2050	GBR	Developed income	4.94891	4.6054	4.94329	4.96227	4.10279
y2050	FRA	Developed income	23.9348	22.0308	38.0561	36.0749	20.2514
y2050	BEL	Developed income	0.659441	0.743757	0.658406	0.661915	0.640214
y2050	NLD	Developing country	0.642894	0.715207	0.642007	0.645016	0.618245
y2050	NOR	Developing country	3.19795	3.19663	3.19813	3.19828	3.19504
y2050	LUX	Developing country	0.0317916	0.0368598	0.0317295	0.0319404	0.0313773
y2050	DEU	Developed income	8.43924	9.5391	9.08559	9.04204	8.19747
y2050	CHE	Developed income	0.350937	0.349511	0.351088	0.351335	0.348837
y2050	ITA	Developing country	24.5507	24.2786	25.8843	25.6956	22.0279
y2050	DNK	Developed income	1.39902	1.62205	1.39628	1.40556	1.38079
y2050	AUT	Developed income	1.98318	1.2509	2.63427	2.54439	1.14876
y2050	SWE	Developing country	2.43998	3.74842	2.43926	2.44155	3.67472
y2050	CZE	Developed income	2.28338	2.59767	2.40904	2.40459	2.22777
y2050	HRV	Developing country	1.72115	1.51202	3.09614	2.90165	1.4141
y2050	SVN	Developing country	0.29147	0.25433	0.536829	0.502131	0.238476
y2050	SJM	Developing country	0.0695282	0.0695282	0.0695282	0.0695282	0.0695282
y2050	POL	Developing country	9.7664	11.3002	9.74758	9.81141	9.63976
y2050	BIH	Developing country	0.945521	0.93955	0.946145	0.947192	0.937054
y2050	HUN	Developing country	6.50152	5.61814	12.1516	11.3515	5.28515
y2050	SVK	Developing country	1.68821	1.39441	2.26386	2.18632	1.25184
y2050	MNE	Developing country	0.184192	0.183014	0.184315	0.184521	0.182484
y2050	SRB	Developing country	3.64146	3.61825	3.64389	3.64796	3.61586
y2050	ALB	Developing country	0.521311	0.518659	0.521592	0.522063	0.517965
y2050	GRC	Developed income	7.3098	7.30875	7.3098	7.3098	6.62521
y2050	MKD	Developing country	0.616565	0.61309	0.616926	0.617532	0.612046
y2050	ROU	Developed income	14.4028	12.9971	23.5525	22.259	12.0733
y2050	LTU	Developing country	2.03705	2.36179	2.03307	2.04658	2.01051
y2050	LVA	Developing country	0.641519	0.741118	0.640297	0.644442	0.63318
y2050	FIN	Developed income	1.76805	2.5637	1.76798	1.76807	2.55203
y2050	EST	Developed income	0.644293	0.695145	0.643658	0.645781	0.637487
y2050	BGR	Developing country	6.40718	5.98967	9.21079	8.81459	5.5116
y2050	BLR	Developing country	2.76428	2.72202	2.70822	2.70641	2.67813
y2050	TUR	Developing country	17.7801	17.7642	17.7818	17.7846	17.7596
y2050	MDA	Developing country	0.974028	0.95709	0.948603	0.948566	0.940107
y2050	CYP	Developed income	0.123462	0.123083	0.123462	0.123462	0.112831
y2050	IRN	Developing country	33.075	33.0555	33.0829	33.0609	33.0707
y2050	UKR	Developing country	15.2634	14.9991	14.869	14.8682	14.7353
y2050	GEO	Developing country	0.533883	0.527467	0.52578	0.525476	0.521077
y2050	ARM	Developing country	0.484622	0.372231	0.485651	0.485198	0.253887
y2050	AZE	Developing country	3.41216	2.00686	3.43119	3.42618	1.40321
y2050	KAZ	Developing country	21.5902	17.7671	21.5763	21.5591	12.7676
y2050	TKM	Developing country	8.44362	6.47591	8.47916	8.47282	5.1891
y2050	UZB	Developing country	18.3195	10.3252	18.4645	18.4397	9.34712
y2050	AFG	Developing country	9.39939	9.35254	9.33925	9.03337	9.32258
y2050	TJK	Developing country	3.49366	1.99041	3.51673	3.50929	1.77395
y2050	KGZ	Developing country	3.44817	2.21967	3.46722	3.46307	1.90629
y2050	MEX	Developing country	151.422	108.518	145.215	128.565	92.9803
y2050	USA	Developed income	274.514	261.354	272.133	273.352	263.631
y2050	GTM	Developing country	7.61693	5.77348	7.09505	6.64564	4.48432
y2050	ECU	Developing country	12.9253	10.2767	12.6729	12.6481	9.86492
y2050	SLV	Developing country	3.26225	1.70072	2.53622	1.75791	2.06871
y2050	HND	Developing country	6.9523	5.27319	6.64091	5.49721	4.41924
y2050	BLZ	Developing country	0.82101	0.500892	0.789447	0.881894	0.211494
y2050	NIC	Developing country	6.74913	5.61258	6.41445	5.6476	5.22285
y2050	CRI	Developing country	2.58241	2.28679	2.56677	2.61243	1.80691
y2050	CUB	Developing country	8.95569	9.41277	9.02729	8.6397	8.19987
y2050	PAN	Developing country	4.0258	3.64175	4.02146	4.03158	2.94622
y2050	PER	Developing country	25.163	19.7255	22.5715	22.0561	19.2079
y2050	COL	Developing country	40.3186	32.8569	39.7034	38.2301	28.4482
y2050	BHS	Developed income	0.0627463	0.0329927	0.0598298	0.0684254	0.00870069
y2050	JAM	Developing country	0.357607	0.342401	0.355764	0.359993	0.28168
y2050	CHL	Developed income	29.048	25.7935	27.8776	27.7426	25.2005
y2050	HTI	Developing country	2.58767	2.19002	2.30037	1.9324	2.20074
y2050	BRA	Developing country	266.042	177.578	236.575	219.09	172.824
y2050	ARG	Developing country	137.771	35.1309	82.6166	57.2935	33.6105
y2050	VEN	Developing country	71.6501	44.4274	43.1326	49.3047	43.9164
y2050	DOM	Developing country	4.19323	3.67209	4.1316	3.86077	3.09753
y2050	BOL	Developing country	9.77391	8.28195	9.08358	8.66417	7.17586
y2050	PRY	Developing country	5.32186	4.28957	4.83543	4.61238	3.77683
y2050	TTO	Developing country	1.7386	0.334806	1.55786	1.59313	0.332754
y2050	FLK	Developing country	9e-15	8e-15	8e-15	8e-15	8e-15
y2050	GUY	Developing country	12.3926	7.75108	11.5538	11.7503	7.73591
y2050	URY	Developed income	67.3122	8.31915	34.9452	19.271	8.04982
y2050	SUR	Developing country	1.80534	3.2557	1.80526	2.21496	3.25234
y2050	GUF	Developing country	0.203918	2.38028	0.203897	0.644407	2.37927
y2050	SGS	Developing country	1e-15	0	1e-15	1e-15	0
y2050	MAR	Developing country	36.9552	37.0484	36.9536	36.9485	36.9539
y2050	TUN	Developing country	4.95555	5.01666	5.19984	5.16524	5.25601
y2050	SAU	Developing country	6.22108	5.75242	6.43907	5.82982	6.04609
y2050	ISR	Developing country	0.552941	0.552941	0.552941	0.552941	0.552941
y2050	JOR	Developing country	0.288913	0.288913	0.288913	0.288913	0.288913
y2050	LBN	Developing country	0.927028	0.927029	0.927028	0.927028	0.927028
y2050	SYR	Developing country	3.01645	3.02021	3.01645	3.01645	3.01643
y2050	IRQ	Developing country	4.9023	4.89943	4.90212	4.90085	4.90182
y2050	YEM	Developing country	3.96577	3.84467	4.02208	3.86467	3.9241
y2050	KWT	Developing country	0.110047	0.109992	0.110047	0.110047	0.110047
y2050	QAT	Developing country	0.00316909	0.00316909	0.00316909	0.00316909	0.00316909
y2050	OMN	Developing country	0.176805	0.143696	0.1922	0.149165	0.166384
y2050	ARE	Developed income	0.0649052	0.0649072	0.0649052	0.0649052	0.0649052
y2050	PAK	Developing country	98.9619	96.6198	95.6141	94.9954	97.7289
y2050	CAN	Developed income	63.5091	63.3895	63.5222	63.4774	63.3582
y2050	PRI	Developing country	0.293046	0.270869	0.29058	0.296901	0.210153
y2050	AUS	Developed income	21.8397	21.5658	44.0515	36.2641	20.9245
y2050	JPN	Developing country	30.6788	31.5847	32.5956	32.5907	31.5133
y2050	NZL	Developing country	11.7597	11.7284	11.7601	11.7624	11.7286
y2050	IDN	Developing country	105.14	106.063	105.404	105.416	105.56
y2050	MYS	Developing country	17.7843	17.8519	17.7362	17.7286	17.7033
y2050	SGP	Developing country	0.0520191	0.0522489	0.0518559	0.0518302	0.0517444
y2050	BRN	Developed income	0.0911712	0.0915739	0.0908852	0.0908401	0.0906897
y2050	PHL	Developing country	28.9004	27.1945	26.7753	26.6103	27.7963
y2050	TLS	Developing country	0.9698	0.962732	0.962698	0.968863	0.982123
y2050	KOR	Developing country	12.3858	10.1738	8.87376	8.05444	8.91968
y2050	PNG	Developing country	5.46568	6.42181	5.96884	6.09119	6.3246
y2050	SLB	Developing country	0.0713479	0.0716631	0.0711241	0.0710889	0.0709711
y2050	NCL	Developing country	0.159296	0.162315	0.196218	0.187314	0.123471
y2050	VUT	Developing country	0.0418298	0.0420146	0.0416986	0.0416779	0.0416089
y2050	FJI	Developing country	0.310053	0.310975	0.310597	0.310604	0.306202
y2050	REU	Developing country	0.00914581	0.00923566	0.00914886	0.00914872	0.00906807
y2050	LKA	Developing country	17.129	21.6799	19.9384	20.3156	21.7241
y2050	BGD	Developing country	58.5752	70.2206	65.5908	65.7577	73.0889
y2050	BTN	Developing country	0.444737	0.403983	0.379536	0.36594	0.377177
y2055	SEN	Developing country	22.8914	10.8303	25.6946	20.3205	11.1989
y2055	GMB	Developing country	0.0895893	0.0744308	0.0924987	0.0709192	0.0922951
y2055	MRT	Developing country	4.77274	4.34363	4.85751	4.54698	4.231
y2055	ESH	Developing country	3.5e-14	3.6e-14	3.6e-14	3.6e-14	3.4e-14
y2055	GNB	Developing country	0.544106	0.452587	0.548473	0.447781	0.547276
y2055	GIN	Developing country	6.36367	5.66508	6.32331	5.727	6.3244
y2055	SLE	Developing country	2.05223	2.00942	2.04084	2.02964	2.04854
y2055	MLI	Developing country	19.7648	9.04736	22.0581	17.1252	9.76831
y2055	LBR	Developing country	2.00962	1.9959	2.00617	2.01432	2.02417
y2055	CIV	Developing country	18.4738	17.9986	18.3402	18.2246	18.4129
y2055	BFA	Developing country	12.4064	4.10948	14.2612	10.1889	4.91667
y2055	GHA	Developing country	12.4358	11.965	12.413	12.1009	12.4534
y2055	TGO	Developing country	3.6675	3.71965	3.74705	3.73689	3.75506
y2055	NER	Developing country	99.9895	67.351	107.52	92.9527	67.6571
y2055	BEN	Developing country	3.1902	2.67244	3.08136	2.89376	3.2076
y2055	DZA	Developing country	2.95254	2.8625	2.97107	2.97185	2.86094
y2055	NGA	Developing country	98.4902	54.6707	113.131	92.1923	54.1396
y2055	CMR	Developing country	24.1402	30.3029	34.2339	33.1085	21.4842
y2055	GAB	Developing country	1.93383	1.93889	1.93589	1.93392	1.93496
y2055	GNQ	Developing country	0.52654	0.522748	0.536284	0.528076	0.554202
y2055	NAM	Developing country	2.28201	2.78778	2.45041	2.45078	2.18559
y2055	AGO	Developing country	6.09938	9.80341	5.98087	5.96233	5.96297
y2055	COG	Developing country	2.41938	2.41895	2.42059	2.42027	2.42114
y2055	COD	Developing country	26.3891	26.0197	26.8754	26.6387	26.47
y2055	LBY	Developing country	10.0081	10.013	10.0714	10.0772	10.025
y2055	TCD	Developing country	19.7967	21.1512	30.4891	27.3936	12.7364
y2055	CAF	Developing country	5.69447	7.36846	7.4799	7.48129	5.66781
y2055	ZAF	Developing country	43.4442	41.5028	43.2774	43.1239	43.1498
y2055	BWA	Developing country	2.19916	2.41561	2.19925	2.19916	2.19882
y2055	ZMB	Developing country	2.73876	3.03133	2.77557	2.77568	2.79803
y2055	SDN	Developing country	43.785	37.6453	41.2663	41.3114	41.128
y2055	ZWE	Developing country	7.8488	7.57947	7.85193	7.9048	7.19813
y2055	LSO	Developing country	0.991641	0.466397	0.991624	0.991625	0.991993
y2055	BDI	Developing country	1.08784	1.03242	1.05542	1.03569	1.01356
y2055	RWA	Developing country	0.558821	0.516122	0.532562	0.516503	0.498306
y2055	TZA	Developing country	9.29151	8.90863	9.13404	9.11005	9.1718
y2055	UGA	Developing country	5.60592	4.68604	5.39955	5.27602	5.19564
y2055	MOZ	Developing country	4.34224	4.79808	4.35793	4.44219	4.07713
y2055	SWZ	Developing country	0.102621	0.0997921	0.101573	0.101112	0.103095
y2055	MWI	Developing country	0.407484	0.47802	0.358929	0.360276	0.350947
y2055	ETH	Developing country	16.5291	14.3184	16.0676	16.0406	16.6474
y2055	EGY	Developing country	46.2243	46.1244	46.3085	46.3582	46.3485
y2055	KEN	Developing country	17.9567	15.1951	17.7922	17.7659	18.0011
y2055	ERI	Developing country	3.80029	3.07248	3.83814	3.76138	3.63245
y2055	SOM	Developing country	23.3471	23.3123	23.347	23.347	23.346
y2055	DJI	Developing country	0.00810026	0.00780597	0.00809999	0.0076385	0.00754013
y2055	MDG	Developing country	9.81026	9.89917	10.1653	10.0311	9.95073
y2055	MUS	Developing country	0	0	0	0	0
y2055	ATF	Developing country	0	0	0	0	0
y2055	CHN	Developing country	789.322	639.339	668.993	687.859	622.973
y2055	IND	Developing country	1115.47	1110.52	1154.19	1163.19	1087.49
y2055	NPL	Developing country	21.8004	26.7507	24.6157	24.8038	26.3769
y2055	MNG	Developing country	1.42255	1.3699	1.45062	1.43233	1.34372
y2055	MMR	Developing country	102.18	89.7669	98.6303	95.093	81.2355
y2055	LAO	Developing country	60.3943	75.247	71.3888	71.8754	72.8423
y2055	THA	Developing country	111.438	92.4284	92.3187	90.3487	98.3319
y2055	KHM	Developing country	32.1033	27.4691	30.0852	29.0083	25.7019
y2055	VNM	Developing country	97.2791	120.097	111.24	112.184	119.291
y2055	RUS	Developing country	158.345	155.657	158.362	157.66	152.268
y2055	PRK	Developing country	7.16182	9.83057	6.80386	7.10386	7.90701
y2055	GRL	Developed income	1.06307	1.06307	1.06307	1.06307	1.06306
y2055	ISL	Developing country	0.857795	0.857662	0.857809	0.857809	0.857533
y2055	ESP	Developed income	27.9128	27.8649	28.3287	28.2696	25.7527
y2055	IRL	Developing country	0.794669	0.801745	0.794542	0.7949	0.790344
y2055	PRT	Developing country	3.66143	3.66029	3.66143	3.66143	3.543
y2055	GBR	Developed income	4.97917	4.60653	4.97304	4.99387	4.11229
y2055	FRA	Developed income	23.7311	21.8298	37.6415	35.692	20.1078
y2055	BEL	Developed income	0.659448	0.738995	0.658318	0.662179	0.636252
y2055	NLD	Developing country	0.641527	0.709744	0.640559	0.643869	0.613588
y2055	NOR	Developing country	3.20527	3.20461	3.20547	3.20605	3.20356
y2055	LUX	Developing country	0.0319329	0.0367178	0.0318649	0.0320972	0.0312619
y2055	DEU	Developed income	8.48351	9.51313	9.11365	9.07653	8.17885
y2055	CHE	Developed income	0.353413	0.353102	0.353653	0.354581	0.353321
y2055	ITA	Developing country	24.1012	23.832	25.4156	25.2296	21.6822
y2055	DNK	Developed income	1.4152	1.62726	1.41219	1.42248	1.38547
y2055	AUT	Developed income	1.98608	1.24692	2.62413	2.53576	1.14731
y2055	SWE	Developing country	2.46963	3.77692	2.46885	2.47135	3.71058
y2055	CZE	Developed income	2.29299	2.58966	2.41706	2.41428	2.22181
y2055	HRV	Developing country	1.72808	1.50066	3.0632	2.87146	1.40688
y2055	SVN	Developing country	0.298926	0.252707	0.531475	0.497255	0.237561
y2055	SJM	Developing country	0.0692191	0.0692191	0.0692191	0.0692191	0.0692191
y2055	POL	Developing country	9.82362	11.2734	9.80304	9.8734	9.61975
y2055	BIH	Developing country	0.956016	0.954783	0.957026	0.960967	0.956082
y2055	HUN	Developing country	6.42664	5.57805	12.0215	11.2325	5.26122
y2055	SVK	Developing country	1.68784	1.39038	2.25711	2.18109	1.25019
y2055	MNE	Developing country	0.186263	0.18602	0.186462	0.18724	0.186238
y2055	SRB	Developing country	3.68126	3.67648	3.68519	3.7005	3.68898
y2055	ALB	Developing country	0.524702	0.524184	0.525157	0.526931	0.525207
y2055	GRC	Developed income	7.15403	7.15301	7.15403	7.15403	6.5102
y2055	MKD	Developing country	0.620939	0.620208	0.621524	0.623805	0.621374
y2055	ROU	Developed income	14.2511	12.8859	23.2999	22.0245	11.9955
y2055	LTU	Developing country	2.0482	2.3551	2.04384	2.05873	2.00516
y2055	LVA	Developing country	0.645233	0.739354	0.643897	0.648465	0.631915
y2055	FIN	Developed income	1.79584	2.59332	1.79576	1.79585	2.58949
y2055	EST	Developed income	0.652448	0.7005	0.651754	0.654092	0.644599
y2055	BGR	Developing country	6.34019	5.92517	9.10194	8.71148	5.46133
y2055	BLR	Developing country	2.76301	2.72268	2.76471	2.70802	2.69885
y2055	TUR	Developing country	17.5786	17.5753	17.5813	17.5919	17.581
y2055	MDA	Developing country	0.971491	0.95541	0.972464	0.946957	0.9479
y2055	CYP	Developed income	0.118777	0.118412	0.118777	0.118777	0.109826
y2055	IRN	Developing country	32.8168	32.7984	32.8333	32.8333	32.8125
y2055	UKR	Developing country	15.2233	14.9723	15.2383	14.8427	14.8553
y2055	GEO	Developing country	0.534805	0.528679	0.53501	0.526846	0.525154
y2055	ARM	Developing country	0.481631	0.383171	0.482669	0.483118	0.28842
y2055	AZE	Developing country	3.36832	2.0871	3.38937	3.39461	1.85434
y2055	KAZ	Developing country	21.3539	18.3666	21.3394	21.3467	13.6573
y2055	TKM	Developing country	8.29957	6.46193	8.33568	8.34663	6.25491
y2055	UZB	Developing country	18.0329	10.5697	18.1801	18.2255	12.353
y2055	AFG	Developing country	9.09948	9.34364	9.23565	8.96407	9.29612
y2055	TJK	Developing country	3.44609	2.05005	3.46962	3.47527	2.29473
y2055	KGZ	Developing country	3.41354	2.28663	3.43296	3.43927	2.30718
y2055	MEX	Developing country	150.159	104.944	141.758	136.721	91.9848
y2055	USA	Developed income	272.298	264.445	267.698	270.001	263.516
y2055	GTM	Developing country	7.52316	5.27076	7.06733	7.2928	4.38877
y2055	ECU	Developing country	13.4171	10.3978	12.8769	12.8554	9.9909
y2055	SLV	Developing country	3.24195	1.67776	2.50326	2.67972	2.07353
y2055	HND	Developing country	6.88508	5.09373	6.6473	6.34236	4.41176
y2055	BLZ	Developing country	0.814006	0.431704	0.783878	0.874019	0.202144
y2055	NIC	Developing country	6.75161	5.56544	6.4141	6.0017	5.2629
y2055	CRI	Developing country	2.56142	2.17899	2.55181	2.56661	1.78568
y2055	CUB	Developing country	8.83516	8.24401	8.91563	8.57723	7.8668
y2055	PAN	Developing country	3.9968	3.59299	3.99287	3.94033	2.93149
y2055	PER	Developing country	25.4252	20.3524	22.6142	22.2143	19.7876
y2055	COL	Developing country	40.3921	32.8594	40.2914	38.6274	28.6482
y2055	BHS	Developed income	0.0622189	0.028443	0.0594156	0.0678225	0.00832729
y2055	JAM	Developing country	0.359426	0.313175	0.357972	0.361695	0.275305
y2055	CHL	Developed income	27.9351	25.1128	26.7754	26.6844	24.4362
y2055	HTI	Developing country	2.56592	1.97036	2.27565	2.29164	2.13931
y2055	BRA	Developing country	272.503	183.355	264.468	242.375	176.002
y2055	ARG	Developing country	159.801	35.8392	115.263	92.1073	34.3984
y2055	VEN	Developing country	71.4693	44.8683	43.4027	49.4963	44.3399
y2055	DOM	Developing country	4.12148	3.29039	4.06002	3.97328	2.99406
y2055	BOL	Developing country	10.6823	9.00571	9.29702	8.97542	7.89197
y2055	PRY	Developing country	5.52059	4.5435	5.37311	5.18713	3.94585
y2055	TTO	Developing country	1.75543	0.338592	1.57716	1.61197	0.336366
y2055	FLK	Developing country	8e-15	7e-15	7e-15	7e-15	7e-15
y2055	GUY	Developing country	12.5322	7.88487	11.7132	11.821	7.84798
y2055	URY	Developed income	67.0602	8.46707	55.7401	42.1032	8.21531
y2055	SUR	Developing country	1.83858	3.32279	1.83853	2.25734	3.31788
y2055	GUF	Developing country	0.207836	2.42731	0.207829	0.6582	2.42581
y2055	SGS	Developing country	1e-15	0	1e-15	1e-15	0
y2055	MAR	Developing country	36.2682	36.3596	36.2666	36.2617	36.267
y2055	TUN	Developing country	5.11671	5.01057	5.17332	5.20338	5.20353
y2055	SAU	Developing country	6.33733	5.92383	6.77383	6.77377	6.17329
y2055	ISR	Developing country	0.609881	0.609881	0.609881	0.609881	0.609881
y2055	JOR	Developing country	0.32117	0.32117	0.32117	0.32117	0.32117
y2055	LBN	Developing country	1.04348	1.04348	1.04348	1.04348	1.04348
y2055	SYR	Developing country	3.08711	3.09091	3.08711	3.08711	3.08709
y2055	IRQ	Developing country	4.92394	4.92112	4.92376	4.92254	4.92347
y2055	YEM	Developing country	4.28827	4.18136	4.40111	4.40111	4.2493
y2055	KWT	Developing country	0.122405	0.122349	0.122405	0.122405	0.122405
y2055	QAT	Developing country	0.00289365	0.00289365	0.00289365	0.00289365	0.00289365
y2055	OMN	Developing country	0.17189	0.142733	0.202661	0.202661	0.162233
y2055	ARE	Developed income	0.0704319	0.0704339	0.0704319	0.0704319	0.0704319
y2055	PAK	Developing country	97.0603	96.1701	94.735	94.3643	97.1349
y2055	CAN	Developed income	63.9032	63.9802	63.8849	64.0805	63.9492
y2055	PRI	Developing country	0.295313	0.241899	0.293212	0.299099	0.204831
y2055	AUS	Developed income	21.8559	21.6636	43.9626	35.8562	21.0295
y2055	JPN	Developing country	30.5157	32.9763	33.2122	33.1981	31.4015
y2055	NZL	Developing country	11.9227	11.899	11.9221	11.933	11.8993
y2055	IDN	Developing country	108.789	109.355	109.116	108.81	108.873
y2055	MYS	Developing country	17.9174	17.9385	17.9181	17.8297	17.7938
y2055	SGP	Developing country	0.052507	0.0525789	0.0525096	0.0522093	0.0520873
y2055	BRN	Developed income	0.0921858	0.0923122	0.0921904	0.0916632	0.091449
y2055	PHL	Developing country	28.8642	27.0968	26.8733	26.5857	27.7534
y2055	TLS	Developing country	1.05058	1.04294	1.0429	1.04956	1.0639
y2055	KOR	Developing country	7.76086	10.7117	7.33082	7.69523	8.59291
y2055	PNG	Developing country	5.60479	6.42149	6.1441	6.18417	6.32387
y2055	SLB	Developing country	0.0727636	0.0728634	0.0727673	0.0723511	0.072182
y2055	NCL	Developing country	0.172702	0.161651	0.195726	0.186441	0.123668
y2055	VUT	Developing country	0.0422836	0.0423416	0.0422857	0.0420439	0.0419456
y2055	FJI	Developing country	0.31367	0.314229	0.31461	0.313168	0.309459
y2055	REU	Developing country	0.00946845	0.00954506	0.00946571	0.00946584	0.00937976
y2055	LKA	Developing country	18.1548	21.6385	20.4905	20.6048	21.7206
y2055	BGD	Developing country	61.3378	69.4324	65.3395	65.3543	72.4253
y2055	BTN	Developing country	0.36093	0.414799	0.352771	0.359845	0.372209
y2060	SEN	Developing country	23.4497	10.4567	26.4464	19.9946	10.9887
y2060	GMB	Developing country	0.0899775	0.0757311	0.0935265	0.0860184	0.0933068
y2060	MRT	Developing country	4.74274	4.52787	4.83351	4.48278	4.20663
y2060	ESH	Developing country	3.5e-14	3.6e-14	3.6e-14	3.6e-14	3.4e-14
y2060	GNB	Developing country	0.549771	0.460889	0.555049	0.543575	0.553755
y2060	GIN	Developing country	6.64537	5.89618	6.53998	6.62276	6.53431
y2060	SLE	Developing country	2.69964	2.15367	2.18361	2.19733	2.18635
y2060	MLI	Developing country	20.5005	8.95572	22.9446	17.6532	9.81918
y2060	LBR	Developing country	2.70603	2.14326	2.13614	2.14182	2.15102
y2060	CIV	Developing country	18.7392	19.2084	19.5225	19.7401	19.5535
y2060	BFA	Developing country	13.0866	4.19348	15.0767	10.8093	5.10439
y2060	GHA	Developing country	12.8145	12.7317	13.168	13.1401	13.1807
y2060	TGO	Developing country	3.61051	3.92516	3.95127	3.94866	3.95082
y2060	NER	Developing country	99.5424	64.2876	107.639	89.6676	65.2554
y2060	BEN	Developing country	3.25916	2.78658	3.21622	3.06572	3.33265
y2060	DZA	Developing country	3.04141	2.94156	3.01686	3.02806	2.93811
y2060	NGA	Developing country	102.755	55.3889	116.368	92.6105	55.5641
y2060	CMR	Developing country	33.0925	30.1711	34.3115	32.9007	21.5299
y2060	GAB	Developing country	1.89795	1.90961	1.89966	1.89884	1.89914
y2060	GNQ	Developing country	0.5326	0.542974	0.526491	0.523021	0.547465
y2060	NAM	Developing country	2.49275	2.66638	2.49021	2.36528	2.13842
y2060	AGO	Developing country	6.10494	9.09383	6.013	6.02331	6.03482
y2060	COG	Developing country	2.67978	2.39856	2.39193	2.39225	2.39234
y2060	COD	Developing country	26.4831	26.6872	26.8757	26.7572	26.5148
y2060	LBY	Developing country	9.85074	9.84777	9.89227	9.88577	9.85202
y2060	TCD	Developing country	28.1791	20.8858	30.9163	27.0663	12.7355
y2060	CAF	Developing country	7.02847	7.11181	7.21514	7.21748	5.43899
y2060	ZAF	Developing country	43.2988	39.9244	43.0462	41.735	41.4391
y2060	BWA	Developing country	2.16405	2.37289	2.16347	2.16347	2.16299
y2060	ZMB	Developing country	3.29343	3.53167	3.33264	3.33729	3.35419
y2060	SDN	Developing country	44.048	37.7203	42.112	41.0368	40.5898
y2060	ZWE	Developing country	8.42936	7.63965	8.46719	7.87165	7.3022
y2060	LSO	Developing country	1.00121	0.482174	1.00115	1.00115	1.00151
y2060	BDI	Developing country	1.14309	1.13899	1.10475	1.09697	1.07251
y2060	RWA	Developing country	0.60956	0.60865	0.578601	0.572252	0.552107
y2060	TZA	Developing country	9.5667	9.41923	9.51113	9.49814	9.55458
y2060	UGA	Developing country	6.00506	5.46299	5.762	5.71434	5.62549
y2060	MOZ	Developing country	4.81033	5.41946	4.89347	4.97442	4.7954
y2060	SWZ	Developing country	0.10946	0.104496	0.10744	0.106379	0.107487
y2060	MWI	Developing country	0.501535	0.50982	0.424716	0.417352	0.41919
y2060	ETH	Developing country	16.9517	14.9647	16.484	16.3781	17.0164
y2060	EGY	Developing country	45.0373	45.2122	45.3497	45.307	45.3757
y2060	KEN	Developing country	18.0418	17.4898	17.8665	17.7573	18.008
y2060	ERI	Developing country	3.7783	3.57657	3.81877	3.72526	3.60099
y2060	SOM	Developing country	22.8094	23.2197	22.8093	22.8093	22.8082
y2060	DJI	Developing country	0.00769616	0.0073803	0.00769581	0.00724645	0.00724495
y2060	MDG	Developing country	10.0885	10.7657	10.3722	10.4162	10.2744
y2060	MUS	Developing country	0	0	0	0	0
y2060	ATF	Developing country	0	0	0	0	0
y2060	CHN	Developing country	765.51	608.421	636.879	645.98	645.453
y2060	IND	Developing country	1102.18	1087.29	1123.78	1130.38	1071.92
y2060	NPL	Developing country	21.9936	25.9517	24.4409	24.637	26.3772
y2060	MNG	Developing country	1.42632	1.38355	1.57232	1.44064	1.3587
y2060	MMR	Developing country	104.333	82.9748	108.088	99.8924	79.3121
y2060	LAO	Developing country	61.4924	74.1133	71.5495	71.7069	73.9471
y2060	THA	Developing country	107.727	84.2046	100.656	94.3288	96.0546
y2060	KHM	Developing country	32.4588	25.389	33.0585	30.4971	25.082
y2060	VNM	Developing country	98.3391	117.699	110.497	111.43	119.775
y2060	RUS	Developing country	159.496	155.932	159.509	159.532	153.82
y2060	PRK	Developing country	7.04953	7.7879	6.60077	7.08983	7.78121
y2060	GRL	Developed income	1.06905	1.06905	1.06905	1.06905	1.06905
y2060	ISL	Developing country	0.86035	0.860206	0.860352	0.860352	0.860077
y2060	ESP	Developed income	27.2187	27.1475	27.6039	27.5444	26.5636
y2060	IRL	Developing country	0.817195	0.824264	0.817087	0.817087	0.816604
y2060	PRT	Developing country	3.5402	3.5391	3.5402	3.5402	3.51596
y2060	GBR	Developed income	5.02355	4.64624	5.01818	5.01816	4.21865
y2060	FRA	Developed income	23.5375	21.6665	37.2153	35.2771	20.2827
y2060	BEL	Developed income	0.661026	0.739947	0.660035	0.660032	0.655777
y2060	NLD	Developing country	0.641347	0.70902	0.640497	0.640494	0.633673
y2060	NOR	Developing country	3.21621	3.21542	3.21649	3.21644	3.21391
y2060	LUX	Developing country	0.0321716	0.0369223	0.032112	0.0321118	0.0321561
y2060	DEU	Developed income	8.55956	9.57093	9.16842	9.07752	8.40075
y2060	CHE	Developed income	0.356806	0.356348	0.357245	0.357167	0.355841
y2060	ITA	Developing country	23.6454	23.3795	24.9379	24.7546	22.5595
y2060	DNK	Developed income	1.43584	1.64786	1.43317	1.43316	1.43514
y2060	AUT	Developed income	1.99414	1.24777	2.61308	2.52348	1.15727
y2060	SWE	Developing country	2.51035	3.81597	2.50967	2.50966	3.76256
y2060	CZE	Developed income	2.30856	2.60488	2.43256	2.41471	2.28271
y2060	HRV	Developing country	1.76262	1.49048	3.02847	2.83949	1.40534
y2060	SVN	Developing country	0.31898	0.251343	0.525844	0.492093	0.236717
y2060	SJM	Developing country	0.0693533	0.0693533	0.0693533	0.0693533	0.0693533
y2060	POL	Developing country	9.91157	11.3527	9.89347	9.89341	9.90684
y2060	BIH	Developing country	0.969896	0.968038	0.971759	0.971428	0.966259
y2060	HUN	Developing country	6.32197	5.54152	11.8838	11.1073	5.2329
y2060	SVK	Developing country	1.68724	1.39409	2.25157	2.17222	1.26846
y2060	MNE	Developing country	0.188999	0.188633	0.189367	0.189301	0.188243
y2060	SRB	Developing country	3.73413	3.72692	3.74137	3.74009	3.72755
y2060	ALB	Developing country	0.529714	0.528915	0.530552	0.530403	0.528557
y2060	GRC	Developed income	6.99945	6.99848	6.99945	6.99945	6.78674
y2060	MKD	Developing country	0.627343	0.626251	0.628421	0.62823	0.625642
y2060	ROU	Developed income	14.0663	12.7822	23.0339	21.7761	12.1033
y2060	LTU	Developing country	2.06556	2.37058	2.06173	2.06172	2.06457
y2060	LVA	Developing country	0.651007	0.744542	0.649832	0.649828	0.650643
y2060	FIN	Developed income	1.83532	2.63269	1.83526	1.83526	2.63528
y2060	EST	Developed income	0.664046	0.711808	0.663438	0.663436	0.664017
y2060	BGR	Developing country	6.27468	5.86162	8.98762	8.60246	5.57479
y2060	BLR	Developing country	2.79934	2.76103	2.80103	2.80099	2.75093
y2060	TUR	Developing country	17.4024	17.3974	17.4073	17.4065	17.3948
y2060	MDA	Developing country	0.982432	0.967254	0.983394	0.983368	0.964527
y2060	CYP	Developed income	0.114551	0.114198	0.114551	0.114551	0.114007
y2060	IRN	Developing country	32.6566	32.6391	32.682	32.682	32.6556
y2060	UKR	Developing country	15.394	15.157	15.4088	15.4084	15.1147
y2060	GEO	Developing country	0.541522	0.535698	0.541737	0.541731	0.534226
y2060	ARM	Developing country	0.480293	0.345747	0.480968	0.482013	0.289673
y2060	AZE	Developing country	3.33935	1.7711	3.35565	3.3701	1.84599
y2060	KAZ	Developing country	21.2094	15.828	21.1818	21.2083	13.7272
y2060	TKM	Developing country	8.17238	6.07716	8.20183	8.22342	6.91144
y2060	UZB	Developing country	17.8057	9.28248	17.9259	18.0145	12.8094
y2060	AFG	Developing country	9.00959	9.40298	9.26365	9.01595	9.39899
y2060	TJK	Developing country	3.41031	1.79064	3.42884	3.44261	2.32321
y2060	KGZ	Developing country	3.3917	2.03749	3.40698	3.4198	2.30165
y2060	MEX	Developing country	147.684	113.9	139.859	129.577	90.0046
y2060	USA	Developed income	272.769	266.805	267.435	267.543	261.7
y2060	GTM	Developing country	7.51763	5.29577	7.08506	6.6934	4.41802
y2060	ECU	Developing country	13.5757	10.4861	13.209	13.2155	10.0297
y2060	SLV	Developing country	3.23192	1.69031	2.52242	1.83381	2.08817
y2060	HND	Developing country	6.91273	5.15122	6.70861	5.65341	4.49872
y2060	BLZ	Developing country	0.809538	0.430172	0.77956	0.869449	0.20188
y2060	NIC	Developing country	6.7436	5.58156	6.42953	5.72913	5.44002
y2060	CRI	Developing country	2.54203	2.1669	2.53255	2.57607	1.79158
y2060	CUB	Developing country	8.73826	8.50063	8.81986	8.43146	7.84901
y2060	PAN	Developing country	3.95614	3.56396	3.95227	3.96189	2.9356
y2060	PER	Developing country	25.3796	20.5057	23.1798	22.6385	20.2069
y2060	COL	Developing country	40.5192	33.0008	40.4976	39.2201	28.8033
y2060	BHS	Developed income	0.0618859	0.0283509	0.0590968	0.0674763	0.0083304
y2060	JAM	Developing country	0.36133	0.315669	0.359872	0.363664	0.278367
y2060	CHL	Developed income	26.7662	24.0045	25.7363	25.7701	23.6542
y2060	HTI	Developing country	2.55218	1.96809	2.27363	1.94153	2.13977
y2060	BRA	Developing country	279.701	187.914	273.533	269.331	178.17
y2060	ARG	Developing country	161.532	36.9686	122.109	116.67	34.9823
y2060	VEN	Developing country	71.2461	45.3277	68.3392	69.8115	44.6206
y2060	DOM	Developing country	4.06131	3.48826	4.00603	3.75047	2.98798
y2060	BOL	Developing country	10.8879	9.13057	9.56995	9.34022	8.43067
y2060	PRY	Developing country	5.78865	4.79266	5.67187	5.65645	4.18909
y2060	TTO	Developing country	1.76801	0.341205	1.74919	1.75453	0.338799
y2060	FLK	Developing country	8e-15	7e-15	8e-15	8e-15	7e-15
y2060	GUY	Developing country	12.6261	7.99205	12.5625	12.5672	7.88944
y2060	URY	Developed income	68.7603	8.56988	59.8706	57.5435	8.34086
y2060	SUR	Developing country	1.8651	3.37664	1.86506	2.29094	3.37183
y2060	GUF	Developing country	0.211019	2.46533	0.211012	0.669098	2.46387
y2060	SGS	Developing country	1e-15	0	1e-15	1e-15	0
y2060	MAR	Developing country	35.6666	35.7562	35.6651	35.6602	35.6654
y2060	TUN	Developing country	4.92616	5.01019	5.13992	5.10642	5.16043
y2060	SAU	Developing country	6.47002	6.10021	7.10905	7.10899	6.39457
y2060	ISR	Developing country	0.679862	0.679862	0.679862	0.679862	0.679862
y2060	JOR	Developing country	0.360915	0.360915	0.360915	0.360915	0.360915
y2060	LBN	Developing country	1.1665	1.1665	1.1665	1.1665	1.1665
y2060	SYR	Developing country	3.24715	3.25116	3.24715	3.24715	3.24713
y2060	IRQ	Developing country	4.9907	4.98787	4.99052	4.98935	4.99024
y2060	YEM	Developing country	4.59139	4.49569	4.75675	4.75675	4.57519
y2060	KWT	Developing country	0.136101	0.136042	0.136101	0.136101	0.136101
y2060	QAT	Developing country	0.00309149	0.00309149	0.00309149	0.00309149	0.00309149
y2060	OMN	Developing country	0.168003	0.141974	0.212976	0.212976	0.16457
y2060	ARE	Developed income	0.0761228	0.0761248	0.0761228	0.0761228	0.0761228
y2060	PAK	Developing country	96.6776	95.2676	95.7358	95.1104	97.3181
y2060	CAN	Developed income	64.7059	64.7757	64.6859	64.868	64.7447
y2060	PRI	Developing country	0.29814	0.244704	0.296006	0.302046	0.20765
y2060	AUS	Developed income	21.9809	21.8117	43.127	35.4424	21.1966
y2060	JPN	Developing country	30.4839	34.1498	33.9156	33.8631	31.9145
y2060	NZL	Developing country	12.1229	12.0994	12.1221	12.1326	12.0996
y2060	IDN	Developing country	112.627	111.984	111.327	110.732	111.511
y2060	MYS	Developing country	18.3021	18.0014	17.8249	17.7343	17.84
y2060	SGP	Developing country	0.0538807	0.0528586	0.0522584	0.0519505	0.0523096
y2060	BRN	Developed income	0.0947581	0.0929605	0.091905	0.0913635	0.091995
y2060	PHL	Developing country	28.7571	26.1641	27.6695	26.8917	27.4857
y2060	TLS	Developing country	1.11362	1.10781	1.10777	1.10756	1.13002
y2060	KOR	Developing country	7.64097	8.46446	7.10692	7.68404	8.45913
y2060	PNG	Developing country	5.6941	6.38558	6.1268	6.16413	6.41359
y2060	SLB	Developing country	0.0754239	0.0739931	0.0731529	0.0727219	0.0732246
y2060	NCL	Developing country	0.188329	0.15613	0.213614	0.196057	0.121749
y2060	VUT	Developing country	0.0434532	0.0426289	0.0421449	0.0418966	0.0421862
y2060	FJI	Developing country	0.321154	0.316963	0.314178	0.312745	0.312156
y2060	REU	Developing country	0.00958367	0.00964663	0.00957488	0.00957524	0.00948422
y2060	LKA	Developing country	18.4985	21.6027	20.4904	20.5851	21.9234
y2060	BGD	Developing country	61.4427	68.1665	65.3046	65.0499	71.3291
y2060	BTN	Developing country	0.362217	0.374282	0.343292	0.358282	0.3705
y2070	SEN	Developing country	25.1391	9.60374	26.497	24.5646	10.1343
y2070	GMB	Developing country	0.0856093	0.0775425	0.0877542	0.0750566	0.0939292
y2070	MRT	Developing country	5.3802	4.3306	4.98331	4.67535	4.47011
y2070	ESH	Developing country	3.6e-14	3.7e-14	3.7e-14	3.7e-14	3.4e-14
y2070	GNB	Developing country	0.548426	0.472999	0.525327	0.475249	0.558384
y2070	GIN	Developing country	7.3322	6.5013	6.83147	6.57943	7.05402
y2070	SLE	Developing country	3.83206	2.58657	2.58753	2.57594	2.59366
y2070	MLI	Developing country	39.7724	8.70927	23.2981	21.575	9.54254
y2070	LBR	Developing country	3.89839	2.54441	2.5296	2.52959	2.54088
y2070	CIV	Developing country	21.053	22.8166	22.8534	22.7884	22.9409
y2070	BFA	Developing country	25.3898	4.35785	15.5662	14.0054	5.19008
y2070	GHA	Developing country	14.4714	15.0685	15.2227	15.0048	15.3256
y2070	TGO	Developing country	3.96178	4.58001	4.45675	4.40624	4.52861
y2070	NER	Developing country	86.2545	57.5544	103.66	98.736	59.2537
y2070	BEN	Developing country	3.6715	3.12748	3.68029	3.51488	3.71766
y2070	DZA	Developing country	3.10936	3.01468	3.08023	3.07752	3.01007
y2070	NGA	Developing country	94.2788	55.9699	123.274	114.792	58.4428
y2070	CMR	Developing country	33.4741	30.607	34.5796	33.9598	21.9943
y2070	GAB	Developing country	1.96718	1.97347	1.96612	1.9673	1.96646
y2070	GNQ	Developing country	0.569303	0.534106	0.532661	0.537898	0.558577
y2070	NAM	Developing country	2.36899	2.67857	2.36557	2.36706	2.08445
y2070	AGO	Developing country	6.6315	8.37772	6.55502	6.56043	6.6017
y2070	COG	Developing country	3.19981	2.50727	2.50178	2.50296	2.50235
y2070	COD	Developing country	27.7031	27.5114	28.0072	28.1217	27.6882
y2070	LBY	Developing country	9.38444	9.36935	9.37603	9.3512	9.35715
y2070	TCD	Developing country	49.67	20.6268	31.6587	29.6814	12.5446
y2070	CAF	Developing country	6.56693	6.70563	6.98835	6.71355	5.05177
y2070	ZAF	Developing country	41.2368	39.5617	40.9881	40.7256	39.1386
y2070	BWA	Developing country	2.12794	2.33537	2.12709	2.12708	2.12669
y2070	ZMB	Developing country	4.59331	4.72982	4.61012	4.61251	4.52394
y2070	SDN	Developing country	44.4167	38.3829	44.498	42.2692	41.0252
y2070	ZWE	Developing country	8.35101	8.55668	8.40949	8.49937	7.49437
y2070	LSO	Developing country	1.02185	0.787494	1.02186	1.02186	1.02207
y2070	BDI	Developing country	1.27601	1.27454	1.27634	1.27566	1.24899
y2070	RWA	Developing country	0.705257	0.706542	0.705836	0.705257	0.683087
y2070	TZA	Developing country	10.7371	10.742	10.9173	10.7212	10.4592
y2070	UGA	Developing country	6.75589	6.54413	6.80197	6.75586	6.71131
y2070	MOZ	Developing country	5.80678	6.48211	5.90997	6.05488	6.02661
y2070	SWZ	Developing country	0.125334	0.122057	0.124326	0.123409	0.123211
y2070	MWI	Developing country	0.590271	0.623677	0.567334	0.563903	0.582592
y2070	ETH	Developing country	17.6787	16.7598	17.2618	17.1368	18.0908
y2070	EGY	Developing country	43.4041	43.3533	43.3433	43.1633	43.4011
y2070	KEN	Developing country	17.8957	18.8047	19.8353	17.7549	20.0538
y2070	ERI	Developing country	4.08781	3.76372	4.25206	3.71699	4.02527
y2070	SOM	Developing country	21.9437	22.353	22.3692	21.9434	22.3679
y2070	DJI	Developing country	0.00715181	0.00670786	0.00717406	0.0071511	0.00714793
y2070	MDG	Developing country	11.132	11.1963	11.1821	11.1779	11.4065
y2070	MUS	Developing country	0	0	0	0	0
y2070	ATF	Developing country	0	0	0	0	0
y2070	CHN	Developing country	710.159	523.293	544.006	585.952	580.26
y2070	IND	Developing country	1083.4	1057.78	1076.81	1079.43	1035.61
y2070	NPL	Developing country	22.9891	25.3003	24.0683	24.16	25.8934
y2070	MNG	Developing country	1.59796	1.39414	1.61239	1.44054	1.37231
y2070	MMR	Developing country	98.612	83.0071	107.161	108.403	72.5223
y2070	LAO	Developing country	64.3127	72.4223	70.9365	70.9892	72.7307
y2070	THA	Developing country	102.457	84.1691	99.7719	101.86	87.7214
y2070	KHM	Developing country	30.6295	25.417	32.7666	33.1898	22.8088
y2070	VNM	Developing country	103.603	114.901	109.168	109.364	117.762
y2070	RUS	Developing country	163.228	160.902	163.21	163.203	157.642
y2070	PRK	Developing country	6.93564	7.64798	6.52718	6.82049	8.11283
y2070	GRL	Developed income	1.08909	1.08908	1.08909	1.08909	1.08908
y2070	ISL	Developing country	0.864684	0.864537	0.864681	0.864681	0.86441
y2070	ESP	Developed income	25.8521	25.5437	26.1728	25.9231	25.1034
y2070	IRL	Developing country	0.877776	0.879022	0.874476	0.874669	0.87172
y2070	PRT	Developing country	3.28886	3.28785	3.28886	3.28886	3.27053
y2070	GBR	Developed income	5.17096	4.7649	5.16454	5.17571	4.35837
y2070	FRA	Developed income	23.1117	21.3204	36.1448	34.309	20.0575
y2070	BEL	Developed income	0.667889	0.744586	0.667535	0.669612	0.665421
y2070	NLD	Developing country	0.643594	0.709408	0.643325	0.645106	0.639244
y2070	NOR	Developing country	3.4075	3.43099	3.27858	3.32638	3.23233
y2070	LUX	Developing country	0.0329136	0.0375431	0.0328946	0.0330199	0.0329927
y2070	DEU	Developed income	8.87223	9.73132	9.43794	9.27702	8.61361
y2070	CHE	Developed income	0.639654	0.678114	0.433043	0.509645	0.361646
y2070	ITA	Developing country	22.6486	22.3804	23.8815	23.6981	21.765
y2070	DNK	Developed income	1.46814	1.67464	1.46729	1.47288	1.47167
y2070	AUT	Developed income	2.09341	1.25323	2.66652	2.50948	1.16763
y2070	SWE	Developing country	2.64189	3.94489	2.63488	2.63623	3.89386
y2070	CZE	Developed income	2.34518	2.64845	2.46854	2.47133	2.34083
y2070	HRV	Developing country	2.20559	1.46804	3.32169	2.75619	1.38946
y2070	SVN	Developing country	0.532467	0.248393	0.68779	0.478458	0.234738
y2070	SJM	Developing country	0.0701164	0.0701164	0.0701164	0.0701164	0.0701164
y2070	POL	Developing country	10.1661	11.5719	10.1597	10.1978	10.189
y2070	BIH	Developing country	2.17337	2.33724	1.29353	1.61974	0.989968
y2070	HUN	Developing country	5.65101	5.46021	11.064	10.7729	5.17322
y2070	SVK	Developing country	1.66392	1.40542	2.2098	2.16665	1.28608
y2070	MNE	Developing country	0.426434	0.458766	0.252843	0.317203	0.192911
y2070	SRB	Developing country	8.41127	9.0481	4.99214	6.2598	3.82019
y2070	ALB	Developing country	1.06809	1.14188	0.67209	0.81891	0.535952
y2070	GRC	Developed income	6.64735	6.64646	6.64735	6.64735	6.4912
y2070	MKD	Developing country	1.32035	1.41521	0.810966	0.999824	0.635638
y2070	ROU	Developed income	13.1701	12.552	21.8465	21.1439	11.9444
y2070	LTU	Developing country	2.11498	2.41246	2.11376	2.12181	2.12006
y2070	LVA	Developing country	0.668018	0.759179	0.667569	0.670039	0.669388
y2070	FIN	Developed income	1.95697	2.74948	1.94973	1.94978	2.75254
y2070	EST	Developed income	0.698084	0.742194	0.696445	0.697709	0.696553
y2070	BGR	Developing country	6.15689	5.71895	8.73598	8.33523	5.47434
y2070	BLR	Developing country	2.93443	2.89513	2.93628	2.93622	2.88645
y2070	TUR	Developing country	20.0538	20.4923	17.6997	18.5725	16.8896
y2070	MDA	Developing country	1.02436	1.01082	1.02536	1.02538	1.00942
y2070	CYP	Developed income	0.104991	0.104669	0.104991	0.104991	0.104493
y2070	IRN	Developing country	32.1133	32.1356	32.1446	32.1446	32.1129
y2070	UKR	Developing country	16.0516	15.8395	16.0671	16.0675	15.8175
y2070	GEO	Developing country	0.564399	0.558319	0.564651	0.56464	0.557017
y2070	ARM	Developing country	0.481254	0.406537	0.480034	0.479861	0.301091
y2070	AZE	Developing country	3.31169	2.42489	3.30262	3.30033	1.94459
y2070	KAZ	Developing country	21.1697	18.3285	21.0867	21.082	14.2765
y2070	TKM	Developing country	7.97535	6.77562	7.96799	7.96482	6.889
y2070	UZB	Developing country	17.4767	12.597	17.4472	17.4353	13.1958
y2070	AFG	Developing country	9.843	10.3897	10.0884	9.86147	10.3983
y2070	TJK	Developing country	3.35749	2.43154	3.34837	3.34365	2.40643
y2070	KGZ	Developing country	3.37306	2.60515	3.36595	3.36393	2.3961
y2070	MEX	Developing country	162.021	116.101	136.414	124.992	90.0125
y2070	USA	Developed income	273.697	258.146	266.928	267.386	256.92
y2070	GTM	Developing country	8.64142	5.38614	7.00173	6.72863	4.51099
y2070	ECU	Developing country	13.7811	10.5438	13.6717	13.4414	10.3343
y2070	SLV	Developing country	4.80034	1.71617	2.41768	1.89556	2.1184
y2070	HND	Developing country	8.36855	5.2252	6.60048	5.70772	4.55677
y2070	BLZ	Developing country	0.804682	0.437139	0.775837	0.864614	0.20731
y2070	NIC	Developing country	7.44402	5.61977	6.24135	5.60662	5.49739
y2070	CRI	Developing country	2.46264	2.29095	2.48344	2.52059	1.94487
y2070	CUB	Developing country	8.7075	8.67514	8.69139	8.31098	8.03302
y2070	PAN	Developing country	3.78125	3.85993	3.84036	3.83811	3.29843
y2070	PER	Developing country	25.1336	20.4997	23.0314	22.76	20.6268
y2070	COL	Developing country	40.1407	34.5656	40.2107	38.9751	30.7261
y2070	BHS	Developed income	0.0615269	0.0288207	0.0588266	0.0671137	0.00856918
y2070	JAM	Developing country	0.363804	0.322398	0.362659	0.366254	0.302638
y2070	CHL	Developed income	24.359	21.7644	23.336	23.4151	21.4905
y2070	HTI	Developing country	3.17254	1.99577	2.22247	1.95673	2.18194
y2070	BRA	Developing country	283.919	190.471	275.723	277.612	183.77
y2070	ARG	Developing country	163.798	38.2032	137.995	123.099	37.0413
y2070	VEN	Developing country	70.5314	45.348	70.42	71.0604	45.0245
y2070	DOM	Developing country	4.28738	3.56885	3.90397	3.68285	3.04548
y2070	BOL	Developing country	11.493	9.59028	10.5076	9.75323	9.49306
y2070	PRY	Developing country	6.31181	5.20046	6.05275	6.12874	5.14027
y2070	TTO	Developing country	1.77398	0.34187	1.77346	1.77349	0.341489
y2070	FLK	Developing country	8e-15	7e-15	8e-15	8e-15	7e-15
y2070	GUY	Developing country	12.6416	8.0849	12.6938	12.6935	7.97462
y2070	URY	Developed income	73.4917	8.66416	58.1439	61.6822	8.6899
y2070	SUR	Developing country	1.8897	3.42959	1.88979	2.32262	3.43503
y2070	GUF	Developing country	0.213959	2.50251	0.214066	0.679815	2.50429
y2070	SGS	Developing country	1e-15	0	1e-15	1e-15	0
y2070	MAR	Developing country	34.3013	34.3724	34.2998	34.295	34.2996
y2070	TUN	Developing country	5.02459	4.9662	4.98133	4.85341	5.02415
y2070	SAU	Developing country	6.55376	6.2031	7.28545	7.28539	6.46567
y2070	ISR	Developing country	0.83277	0.83277	0.83277	0.83277	0.83277
y2070	JOR	Developing country	0.446656	0.446656	0.446656	0.446656	0.446656
y2070	LBN	Developing country	1.29774	1.29774	1.29774	1.29774	1.29774
y2070	SYR	Developing country	3.66881	3.67289	3.66881	3.66881	3.66877
y2070	IRQ	Developing country	5.08467	5.07286	5.08451	5.08341	5.08392
y2070	YEM	Developing country	4.71019	4.61956	4.89927	4.89927	4.69055
y2070	KWT	Developing country	0.156939	0.156879	0.156939	0.156939	0.156939
y2070	QAT	Developing country	0.00338395	0.00338395	0.00338395	0.00338395	0.00338395
y2070	OMN	Developing country	0.165123	0.140422	0.21665	0.21665	0.160742
y2070	ARE	Developed income	0.0816823	0.0816844	0.0816823	0.0816823	0.0816823
y2070	PAK	Developing country	97.5607	96.5727	96.7554	96.9153	97.7649
y2070	CAN	Developed income	66.8618	66.9423	66.8412	67.0031	66.8931
y2070	PRI	Developing country	0.306027	0.255715	0.304143	0.310202	0.224404
y2070	AUS	Developed income	22.2097	22.7747	41.4952	34.6433	21.4805
y2070	JPN	Developing country	30.6052	34.7896	34.5508	34.4668	33.7045
y2070	NZL	Developing country	12.5757	12.5687	12.575	12.5849	12.5526
y2070	IDN	Developing country	120.569	112.454	111.856	111.146	114.622
y2070	MYS	Developing country	20.0843	18.2303	18.0507	17.9625	18.3188
y2070	SGP	Developing country	0.060236	0.0539242	0.053313	0.0530126	0.0542254
y2070	BRN	Developed income	0.106176	0.0950499	0.0939726	0.0934432	0.095581
y2070	PHL	Developing country	29.9216	26.3168	27.7394	27.8965	26.9258
y2070	TLS	Developing country	1.14819	1.0867	1.08783	1.08281	1.37904
y2070	KOR	Developing country	7.51722	8.32076	7.06472	7.39579	8.83676
y2070	PNG	Developing country	6.04534	6.31832	6.12184	6.11535	6.53703
y2070	SLB	Developing country	0.0854772	0.0765204	0.0756531	0.0752269	0.0769479
y2070	NCL	Developing country	0.182901	0.157745	0.213171	0.213181	0.114908
y2070	VUT	Developing country	0.0486813	0.0435802	0.0430862	0.0428435	0.0438237
y2070	FJI	Developing country	0.351919	0.322149	0.318209	0.316846	0.322691
y2070	REU	Developing country	0.00997541	0.0100347	0.00997674	0.00997692	0.00985674
y2070	LKA	Developing country	19.5928	21.189	20.3033	20.2771	21.7181
y2070	BGD	Developing country	64.206	66.5342	64.0675	64.2352	68.8872
y2070	BTN	Developing country	0.370815	0.372963	0.342578	0.353485	0.382248
y2080	SEN	Developing country	22.6122	8.81755	23.8773	23.7322	9.31728
y2080	GMB	Developing country	0.0836507	0.0762426	0.0836057	0.0713259	0.0920455
y2080	MRT	Developing country	5.13763	4.18802	4.78699	4.78484	4.33341
y2080	ESH	Developing country	3.4e-14	3.4e-14	3.5e-14	3.5e-14	3.3e-14
y2080	GNB	Developing country	0.536723	0.465817	0.536279	0.457163	0.548071
y2080	GIN	Developing country	8.05355	7.05771	7.78606	7.07473	7.58956
y2080	SLE	Developing country	6.06488	3.09674	3.8782	3.09267	3.10352
y2080	MLI	Developing country	36.3022	8.35025	21.8125	21.1808	9.14482
y2080	LBR	Developing country	6.31729	3.03845	3.87964	3.03368	3.03973
y2080	CIV	Developing country	22.0851	27.038	26.0219	26.9843	27.1608
y2080	BFA	Developing country	23.2278	4.38007	14.4559	13.9209	5.1729
y2080	GHA	Developing country	15.8554	17.7523	17.3947	17.6145	17.9694
y2080	TGO	Developing country	3.88162	5.36855	4.86933	5.20055	5.22766
y2080	NER	Developing country	76.9318	51.6928	92.6357	92.6593	53.2925
y2080	BEN	Developing country	3.63093	3.45585	3.91666	3.99067	4.21516
y2080	DZA	Developing country	3.13286	3.04476	3.10365	3.10346	3.03988
y2080	NGA	Developing country	92.7401	60.2366	119.388	119.688	61.2317
y2080	CMR	Developing country	36.4458	31.031	35.2744	34.3256	22.6241
y2080	GAB	Developing country	2.06444	2.069	2.06316	2.06284	2.06323
y2080	GNQ	Developing country	0.644087	0.547142	0.576741	0.551513	0.57929
y2080	NAM	Developing country	2.26871	2.56129	2.29557	2.27048	2.09681
y2080	AGO	Developing country	7.33969	8.31295	7.12694	7.09506	7.06504
y2080	COG	Developing country	4.34994	2.66645	3.09826	2.66742	2.66339
y2080	COD	Developing country	29.9722	29.3554	29.9081	29.7315	29.1713
y2080	LBY	Developing country	8.95497	8.95183	8.95494	8.95488	8.93777
y2080	TCD	Developing country	54.0533	20.0243	30.4444	29.0603	12.1246
y2080	CAF	Developing country	8.81338	6.34436	6.78746	6.34503	4.72827
y2080	ZAF	Developing country	39.1999	37.6329	38.8302	38.3838	37.7268
y2080	BWA	Developing country	2.10285	2.3116	2.10215	2.10215	2.10144
y2080	ZMB	Developing country	5.86106	5.96231	5.88954	5.88563	5.62251
y2080	SDN	Developing country	45.5227	39.3004	42.7452	42.6687	40.8655
y2080	ZWE	Developing country	8.27453	8.48825	8.39158	8.5435	7.9411
y2080	LSO	Developing country	1.02232	1.02238	1.0221	1.0221	1.02229
y2080	BDI	Developing country	1.35422	1.44936	1.41256	1.43147	1.41908
y2080	RWA	Developing country	0.745054	0.830773	0.796284	0.812777	0.803189
y2080	TZA	Developing country	12.1231	12.345	12.2169	12.2818	10.6733
y2080	UGA	Developing country	7.37379	7.75631	7.62027	7.68514	7.64664
y2080	MOZ	Developing country	6.7571	7.42142	6.95741	7.20249	7.10963
y2080	SWZ	Developing country	0.142844	0.139375	0.141124	0.139567	0.140222
y2080	MWI	Developing country	0.751629	0.753283	0.720816	0.714853	0.743428
y2080	ETH	Developing country	18.5903	18.7928	18.6757	18.4444	19.3184
y2080	EGY	Developing country	41.586	41.5572	41.5895	41.5915	41.5843
y2080	KEN	Developing country	17.6799	19.9029	19.8199	19.753	20.0567
y2080	ERI	Developing country	3.95495	3.91783	4.1439	4.13419	3.92809
y2080	SOM	Developing country	21.9385	22.3481	22.4028	22.3637	22.3477
y2080	DJI	Developing country	0.00677769	0.00633272	0.00677667	0.00677664	0.0067734
y2080	MDG	Developing country	12.3912	12.0444	12.2446	12.1499	12.3117
y2080	MUS	Developing country	0	0	0	0	0
y2080	ATF	Developing country	0	0	0	0	0
y2080	CHN	Developing country	639.258	533.029	594.821	580.972	630.834
y2080	IND	Developing country	1023.67	998.111	1012.48	1012.62	989.682
y2080	NPL	Developing country	22.4587	24.6919	23.5465	23.5549	25.202
y2080	MNG	Developing country	1.60776	1.39003	1.62743	1.55325	1.36727
y2080	MMR	Developing country	101.891	83.0289	106.07	107.458	68.2306
y2080	LAO	Developing country	63.6798	70.7625	69.2697	69.3118	70.8607
y2080	THA	Developing country	99.0611	84.1242	98.6517	100.949	82.8199
y2080	KHM	Developing country	31.3558	25.4406	32.4096	32.909	21.4378
y2080	VNM	Developing country	101.413	112.192	106.699	106.711	114.945
y2080	RUS	Developing country	164.408	164.245	164.458	164.321	159.531
y2080	PRK	Developing country	6.38775	7.55542	6.76227	6.724	7.78688
y2080	GRL	Developed income	1.10829	1.10829	1.10829	1.10829	1.10829
y2080	ISL	Developing country	0.875779	0.875612	0.875752	0.875752	0.875488
y2080	ESP	Developed income	25.6926	24.3131	25.0822	24.7128	24.263
y2080	IRL	Developing country	0.933771	0.936577	0.932202	0.932129	0.929611
y2080	PRT	Developing country	3.24912	3.10936	3.11029	3.11029	3.1079
y2080	GBR	Developed income	5.31808	4.88366	5.32366	5.31944	4.50171
y2080	FRA	Developed income	23.5457	21.0929	34.8763	33.0891	20.0573
y2080	BEL	Developed income	0.691115	0.748845	0.675954	0.675208	0.677621
y2080	NLD	Developing country	0.652778	0.710428	0.647914	0.647274	0.649537
y2080	NOR	Developing country	3.46487	3.46681	3.37216	3.36619	3.35496
y2080	LUX	Developing country	0.0335681	0.038061	0.0336549	0.0336112	0.0337722
y2080	DEU	Developed income	9.05565	9.88046	9.68744	9.42298	8.82644
y2080	CHE	Developed income	0.646021	0.674942	0.522153	0.512559	0.497941
y2080	ITA	Developing country	20.5045	21.649	23.0633	22.8798	21.5938
y2080	DNK	Developed income	1.49689	1.69752	1.50101	1.49881	1.50624
y2080	AUT	Developed income	2.12177	1.26249	2.71061	2.50911	1.18341
y2080	SWE	Developing country	2.7701	4.10366	2.76749	2.76701	4.0553
y2080	CZE	Developed income	2.38937	2.68654	2.50257	2.50165	2.39668
y2080	HRV	Developing country	2.28852	1.45338	3.5443	2.7451	1.38564
y2080	SVN	Developing country	0.546154	0.246518	0.823823	0.505341	0.234274
y2080	SJM	Developing country	0.0706335	0.0706335	0.0706335	0.0706335	0.0706335
y2080	POL	Developing country	10.3953	11.7642	10.4229	10.4081	10.4582
y2080	BIH	Developing country	2.19005	2.31957	1.66803	1.62712	1.56544
y2080	HUN	Developing country	5.50761	5.41249	10.2028	10.2164	5.15648
y2080	SVK	Developing country	1.67879	1.41873	2.16599	2.14073	1.30755
y2080	MNE	Developing country	0.430544	0.455288	0.326728	0.318656	0.306422
y2080	SRB	Developing country	8.32409	8.98458	6.45103	6.29196	6.06439
y2080	ALB	Developing country	1.06333	1.13114	0.837777	0.81936	0.792355
y2080	GRC	Developed income	6.24628	6.37854	6.37937	6.37937	6.37899
y2080	MKD	Developing country	1.31615	1.4016	1.02434	1.00065	0.965663
y2080	ROU	Developed income	12.5229	12.4018	20.5813	20.2264	11.9421
y2080	LTU	Developing country	2.15847	2.4477	2.16435	2.16125	2.17189
y2080	LVA	Developing country	0.682762	0.771317	0.684414	0.683574	0.686615
y2080	FIN	Developed income	2.0707	2.88558	2.06697	2.06695	2.88895
y2080	EST	Developed income	0.729039	0.772568	0.729149	0.728719	0.72954
y2080	BGR	Developing country	5.88007	5.62272	8.46106	8.05112	5.4791
y2080	BLR	Developing country	2.9374	2.92435	2.94209	2.93943	2.91523
y2080	TUR	Developing country	19.5374	19.928	18.183	18.0734	17.9117
y2080	MDA	Developing country	1.02453	1.01958	1.02564	1.02575	1.01472
y2080	CYP	Developed income	0.0969462	0.0966482	0.0969462	0.0969462	0.0964861
y2080	IRN	Developing country	31.5692	31.5834	31.5849	31.5878	31.5638
y2080	UKR	Developing country	16.0571	15.9792	16.0748	16.076	15.9045
y2080	GEO	Developing country	0.566646	0.564525	0.567371	0.566915	0.563345
y2080	ARM	Developing country	0.478881	0.478749	0.476127	0.474655	0.299632
y2080	AZE	Developing country	3.26025	3.27265	3.22924	3.21058	1.88394
y2080	KAZ	Developing country	21.0283	20.9741	20.9084	20.8646	14.4849
y2080	TKM	Developing country	7.92573	7.9541	7.88531	7.85902	6.69061
y2080	UZB	Developing country	17.1991	17.316	17.0353	16.9293	12.7133
y2080	AFG	Developing country	10.8475	11.5293	11.0896	10.8619	11.534
y2080	TJK	Developing country	3.3019	3.31361	3.268	3.24593	2.32665
y2080	KGZ	Developing country	3.33883	3.35129	3.31189	3.29576	2.35263
y2080	MEX	Developing country	207.775	116.266	136.599	128.597	90.001
y2080	USA	Developed income	272.625	254.205	261.793	262.069	254.134
y2080	GTM	Developing country	17.1945	5.32339	7.03981	7.25567	4.6676
y2080	ECU	Developing country	13.6415	12.7727	13.6172	13.3647	10.2725
y2080	SLV	Developing country	5.91524	1.7546	2.65354	2.80373	2.14179
y2080	HND	Developing country	12.5409	5.19078	6.78942	6.54017	4.61181
y2080	BLZ	Developing country	2.24628	0.4279	0.75303	0.839797	0.219806
y2080	NIC	Developing country	9.42875	5.4899	6.29592	6.20105	5.39392
y2080	CRI	Developing country	3.99315	2.19331	2.40691	2.44873	1.9007
y2080	CUB	Developing country	21.5253	8.46888	8.44187	8.11569	8.45849
y2080	PAN	Developing country	4.11814	3.65548	3.71565	3.72479	3.13148
y2080	PER	Developing country	24.8199	20.7875	22.6289	22.1764	20.7913
y2080	COL	Developing country	43.2194	34.5217	39.4224	38.1966	29.8075
y2080	BHS	Developed income	0.17178	0.0282185	0.0571065	0.0651971	0.00909364
y2080	JAM	Developing country	0.822458	0.320952	0.357803	0.361487	0.316971
y2080	CHL	Developed income	21.6401	19.1498	20.6248	20.6723	19.1279
y2080	HTI	Developing country	5.83576	1.98159	2.27669	2.28628	2.26828
y2080	BRA	Developing country	296.103	218.965	272.347	276.474	185.691
y2080	ARG	Developing country	174.864	39.0072	133.544	117.967	37.7833
y2080	VEN	Developing country	68.9773	47.8971	68.847	69.4868	44.169
y2080	DOM	Developing country	8.81419	3.48747	3.84504	3.75155	3.17257
y2080	BOL	Developing country	11.9213	9.70018	10.6245	9.90894	10.0312
y2080	PRY	Developing country	6.48394	5.33413	6.14544	6.19888	5.3644
y2080	TTO	Developing country	1.7386	0.357006	1.73808	1.73811	0.334777
y2080	FLK	Developing country	8e-15	7e-15	8e-15	8e-15	7e-15
y2080	GUY	Developing country	12.4011	8.0647	12.3859	12.4298	7.84223
y2080	URY	Developed income	79.465	8.84425	58.2476	60.6803	8.796
y2080	SUR	Developing country	1.86951	3.39292	1.86941	2.30075	3.39851
y2080	GUF	Developing country	0.211939	2.46962	0.212021	0.676078	2.47144
y2080	SGS	Developing country	1e-15	1e-15	1e-15	1e-15	0
y2080	MAR	Developing country	33.065	33.1335	33.0646	33.0588	33.0643
y2080	TUN	Developing country	4.88137	4.83837	4.88169	4.88133	4.88101
y2080	SAU	Developing country	6.46839	6.07725	6.88255	6.8825	6.33948
y2080	ISR	Developing country	1.02619	1.02619	1.02619	1.02619	1.02619
y2080	JOR	Developing country	0.555021	0.555021	0.555021	0.555021	0.555021
y2080	LBN	Developing country	1.32337	1.32337	1.32337	1.32337	1.32337
y2080	SYR	Developing country	4.18058	4.18558	4.18062	4.18058	4.18059
y2080	IRQ	Developing country	5.18818	5.17722	5.18866	5.18695	5.1881
y2080	YEM	Developing country	4.18562	4.08503	4.29211	4.29211	4.15546
y2080	KWT	Developing country	0.168229	0.168168	0.168229	0.168229	0.168229
y2080	QAT	Developing country	0.00359914	0.00359914	0.00359914	0.00359914	0.00359914
y2080	OMN	Developing country	0.167207	0.139583	0.19645	0.19645	0.159893
y2080	ARE	Developed income	0.0829675	0.0829696	0.0829675	0.0829675	0.0829675
y2080	PAK	Developing country	94.7551	94.8234	94.8244	94.8851	95.3305
y2080	CAN	Developed income	68.7528	68.8238	68.7069	68.7007	68.7614
y2080	PRI	Developing country	0.795776	0.255589	0.301159	0.307315	0.239804
y2080	AUS	Developed income	23.0784	22.5418	40.4552	34.413	21.3224
y2080	JPN	Developing country	31.0041	33.4175	33.8812	33.4299	33.553
y2080	NZL	Developing country	12.9773	12.9785	12.9757	12.9798	12.9536
y2080	IDN	Developing country	119.345	113.236	112.6	112.311	117.737
y2080	MYS	Developing country	20.256	18.449	18.2552	18.1684	19.7692
y2080	SGP	Developing country	0.0610956	0.0549378	0.0542772	0.0539814	0.0594367
y2080	BRN	Developed income	0.107831	0.0969624	0.0957965	0.0952745	0.104903
y2080	PHL	Developing country	29.6363	26.4756	27.7618	27.9429	27.6742
y2080	TLS	Developing country	1.08372	1.07643	1.07807	1.0849	1.30087
y2080	KOR	Developing country	6.91825	8.22789	7.33079	7.29097	8.48696
y2080	PNG	Developing country	5.9862	6.24402	6.05287	6.04545	6.58355
y2080	SLB	Developing country	0.0872748	0.0784783	0.0775347	0.0771122	0.084905
y2080	NCL	Developing country	0.201869	0.15895	0.212099	0.212573	0.112877
y2080	VUT	Developing country	0.0494365	0.0444538	0.0439193	0.04368	0.0480942
y2080	FJI	Developing country	0.355678	0.32565	0.322445	0.32101	0.347475
y2080	REU	Developing country	0.0106591	0.0106635	0.0106258	0.0106258	0.0104943
y2080	LKA	Developing country	19.2132	20.7631	19.8884	19.8839	21.2779
y2080	BGD	Developing country	62.5427	64.9814	62.4906	62.6767	67.0087
y2080	BTN	Developing country	0.360683	0.371943	0.348429	0.349137	0.389633
y2090	SEN	Developing country	21.2451	8.43792	22.325	22.0633	8.89745
y2090	GMB	Developing country	0.0824971	0.0758268	0.0826528	0.0722564	0.0909734
y2090	MRT	Developing country	5.40713	4.24607	4.67942	4.74261	4.22501
y2090	ESH	Developing country	3e-14	3.1e-14	3e-14	3e-14	2.8e-14
y2090	GNB	Developing country	0.531101	0.465452	0.530919	0.463784	0.542475
y2090	GIN	Developing country	8.84735	7.80805	8.6328	7.87753	8.30188
y2090	SLE	Developing country	7.31482	3.72239	5.66141	3.72637	3.733
y2090	MLI	Developing country	34.4896	8.268	21.5445	22.6192	8.96398
y2090	LBR	Developing country	7.60951	3.64091	5.77159	3.64246	3.64851
y2090	CIV	Developing country	26.2367	32.2468	29.1283	32.2495	32.3921
y2090	BFA	Developing country	22.0856	4.4683	14.2991	14.819	5.22426
y2090	GHA	Developing country	18.7271	21.0198	19.842	20.9312	21.2518
y2090	TGO	Developing country	4.5479	6.36024	5.30416	6.17865	6.20726
y2090	NER	Developing country	71.8202	48.7172	85.2097	83.484	49.643
y2090	BEN	Developing country	4.04318	3.94287	4.20292	4.52465	4.74663
y2090	DZA	Developing country	3.25696	3.17417	3.25641	3.25611	3.16983
y2090	NGA	Developing country	95.7697	66.6978	119.411	117.712	66.383
y2090	CMR	Developing country	38.5564	31.7871	37.2443	34.8711	23.9051
y2090	GAB	Developing country	2.11449	2.11895	2.11307	2.11274	2.11287
y2090	GNQ	Developing country	0.670858	0.554042	0.620783	0.558759	0.587258
y2090	NAM	Developing country	2.31167	2.52298	2.27398	2.25242	2.17719
y2090	AGO	Developing country	7.89787	8.3052	7.59074	7.47316	7.41461
y2090	COG	Developing country	4.83753	2.79929	3.89401	2.80162	2.7969
y2090	COD	Developing country	31.8859	30.4863	31.0674	30.9965	29.9604
y2090	LBY	Developing country	8.75463	8.75442	8.75473	8.75333	8.74298
y2090	TCD	Developing country	81.4736	19.4789	38.5185	31.0299	12.0476
y2090	CAF	Developing country	18.7993	6.04014	9.32997	6.07691	4.519
y2090	ZAF	Developing country	38.1696	36.6762	37.4678	37.3764	37.5023
y2090	BWA	Developing country	2.11528	2.3152	2.10805	2.1083	2.10756
y2090	ZMB	Developing country	6.84385	6.89088	6.84472	6.84544	6.33118
y2090	SDN	Developing country	46.8149	40.0937	44.2422	43.5858	42.2565
y2090	ZWE	Developing country	8.31534	8.50926	8.55011	8.58531	8.45193
y2090	LSO	Developing country	1.00874	1.00791	1.00822	1.00836	1.00859
y2090	BDI	Developing country	1.50026	1.60979	1.56704	1.57764	1.57485
y2090	RWA	Developing country	0.852446	0.950687	0.911004	0.920233	0.919115
y2090	TZA	Developing country	13.9643	13.8708	13.7895	13.7825	10.6399
y2090	UGA	Developing country	8.28064	8.65882	8.50235	8.53831	8.53348
y2090	MOZ	Developing country	7.44621	8.04822	7.821	7.87791	7.80608
y2090	SWZ	Developing country	0.153603	0.150735	0.151096	0.150737	0.151676
y2090	MWI	Developing country	0.828189	0.84137	0.816876	0.815536	0.849648
y2090	ETH	Developing country	20.2197	20.4591	20.2229	20.194	20.6479
y2090	EGY	Developing country	41.1983	41.1524	41.1782	41.3129	41.1944
y2090	KEN	Developing country	20.1154	19.8201	19.7173	19.6575	20.0277
y2090	ERI	Developing country	4.45281	3.82469	4.04721	4.07255	3.82852
y2090	SOM	Developing country	23.8785	23.7638	23.818	23.7798	23.3607
y2090	DJI	Developing country	0.00693065	0.00654963	0.0065524	0.0065524	0.00654905
y2090	MDG	Developing country	13.4935	12.7095	13.2617	13.1652	13.0168
y2090	MUS	Developing country	0	0	0	0	0
y2090	ATF	Developing country	0	0	0	0	0
y2090	CHN	Developing country	575.681	477.438	498.952	496.954	515.905
y2090	IND	Developing country	886.631	874.534	873.142	874.379	864.762
y2090	NPL	Developing country	21.7386	23.9444	22.9592	22.8069	24.3481
y2090	MNG	Developing country	1.57366	1.32018	1.62035	1.5711	1.32538
y2090	MMR	Developing country	89.7436	83.5658	105.205	106.414	62.0218
y2090	LAO	Developing country	61.251	68.7338	67.1984	67.1745	68.4995
y2090	THA	Developing country	84.7993	84.5731	97.6184	99.9308	75.5175
y2090	KHM	Developing country	27.3638	25.6403	32.0977	32.6046	19.4374
y2090	VNM	Developing country	98.2475	108.789	103.693	103.311	111.42
y2090	RUS	Developing country	163.571	163.158	163.204	163.161	158.422
y2090	PRK	Developing country	6.49182	7.36353	7.29057	6.59738	7.35556
y2090	GRL	Developed income	1.10825	1.10825	1.10825	1.10825	1.10825
y2090	ISL	Developing country	0.90185	0.901653	0.901789	0.901789	0.901532
y2090	ESP	Developed income	25.5778	23.6156	24.3793	24.1407	23.581
y2090	IRL	Developing country	0.975909	0.981107	0.97445	0.974439	0.972219
y2090	PRT	Developing country	3.2368	3.02048	3.02136	3.02153	3.01907
y2090	GBR	Developed income	5.39345	4.91368	5.38448	5.38376	4.54675
y2090	FRA	Developed income	23.4824	20.3517	33.2749	31.6208	19.8094
y2090	BEL	Developed income	0.696467	0.740824	0.669121	0.669048	0.672888
y2090	NLD	Developing country	0.652339	0.702909	0.641403	0.64133	0.644831
y2090	NOR	Developing country	3.55192	3.55227	3.46051	3.45758	3.44711
y2090	LUX	Developing country	0.0335015	0.0377298	0.0333875	0.0333832	0.0336324
y2090	DEU	Developed income	9.03942	9.80257	9.59702	9.41446	8.81409
y2090	CHE	Developed income	0.64209	0.668276	0.519786	0.51506	0.50159
y2090	ITA	Developing country	19.3766	21.2688	22.6095	22.4413	21.2588
y2090	DNK	Developed income	1.49085	1.68155	1.48803	1.48759	1.49894
y2090	AUT	Developed income	2.13308	1.23761	2.68017	2.53222	1.18248
y2090	SWE	Developing country	2.87051	4.25272	2.8666	2.86655	4.20184
y2090	CZE	Developed income	2.38192	2.66132	2.47224	2.46765	2.38837
y2090	HRV	Developing country	2.27063	1.38888	3.43724	2.89996	1.36785
y2090	SVN	Developing country	0.532094	0.235358	0.816801	0.61518	0.231464
y2090	SJM	Developing country	0.0693852	0.0693852	0.0693852	0.0693852	0.0693852
y2090	POL	Developing country	10.3798	11.6816	10.3582	10.3554	10.4325
y2090	BIH	Developing country	2.15732	2.27515	1.64177	1.62162	1.56481
y2090	HUN	Developing country	5.3605	5.15589	9.55517	9.32817	5.09096
y2090	SVK	Developing country	1.67879	1.3923	2.11358	2.0748	1.3041
y2090	MNE	Developing country	0.424067	0.44652	0.321524	0.317547	0.306273
y2090	SRB	Developing country	8.20567	8.81886	6.35368	6.27524	6.06643
y2090	ALB	Developing country	1.04934	1.11177	0.826461	0.817384	0.792563
y2090	GRC	Developed income	6.03786	6.24294	6.24373	6.24357	6.24341
y2090	MKD	Developing country	1.29603	1.37458	1.00771	0.996041	0.963869
y2090	ROU	Developed income	12.0459	11.9552	19.523	18.9289	11.8064
y2090	LTU	Developing country	2.1517	2.42622	2.14699	2.14643	2.16274
y2090	LVA	Developing country	0.682575	0.765784	0.680092	0.680029	0.684812
y2090	FIN	Developed income	2.15836	3.0081	2.15542	2.15542	3.00695
y2090	EST	Developed income	0.746801	0.788776	0.744958	0.744926	0.74673
y2090	BGR	Developing country	5.68178	5.46695	8.13703	7.77429	5.41846
y2090	BLR	Developing country	2.80786	2.79649	2.80764	2.80736	2.77726
y2090	TUR	Developing country	19.416	19.7751	18.0765	18.0225	17.8736
y2090	MDA	Developing country	0.979483	0.976424	0.980804	0.980696	0.967457
y2090	CYP	Developed income	0.0916154	0.0913337	0.0916154	0.0916154	0.0911806
y2090	IRN	Developing country	31.7784	31.7951	31.7774	31.7802	31.7762
y2090	UKR	Developing country	15.357	15.308	15.377	15.3754	15.1695
y2090	GEO	Developing country	0.549208	0.547264	0.549081	0.549041	0.544599
y2090	ARM	Developing country	0.484292	0.474587	0.471273	0.469419	0.302346
y2090	AZE	Developing country	3.32741	3.21223	3.15981	3.13476	1.8964
y2090	KAZ	Developing country	20.9837	20.6639	20.5816	20.5317	14.6127
y2090	TKM	Developing country	8.30319	8.14582	8.06422	8.02773	6.5399
y2090	UZB	Developing country	17.9021	17.2631	16.93	16.7824	12.6961
y2090	AFG	Developing country	12.0193	12.0619	12.2549	12.0262	12.5773
y2090	TJK	Developing country	3.40681	3.27885	3.22407	3.19426	2.33926
y2090	KGZ	Developing country	3.41731	3.317	3.26997	3.24777	2.38234
y2090	MEX	Developing country	197.815	114.508	134.265	127.933	90.6253
y2090	USA	Developed income	268.17	248.604	258.394	259.325	246.885
y2090	GTM	Developing country	16.461	5.236	6.97014	7.29003	4.65798
y2090	ECU	Developing country	13.8698	12.6565	13.6347	13.4064	10.2141
y2090	SLV	Developing country	5.33427	1.77815	2.64241	2.93656	2.16849
y2090	HND	Developing country	11.8242	5.0034	6.73157	6.62595	4.60184
y2090	BLZ	Developing country	2.19441	0.419257	0.744321	0.830237	0.218073
y2090	NIC	Developing country	8.87137	4.8486	6.18756	6.19906	5.3163
y2090	CRI	Developing country	3.89554	2.09641	2.35502	2.39639	1.8541
y2090	CUB	Developing country	20.9825	8.28954	8.32313	8.00913	8.42583
y2090	PAN	Developing country	4.00291	3.46034	3.61231	3.62117	3.02845
y2090	PER	Developing country	24.3686	19.8154	21.9306	21.5978	20.6025
y2090	COL	Developing country	42.458	33.4945	38.6736	37.4661	29.0935
y2090	BHS	Developed income	0.167843	0.027651	0.0564515	0.0644636	0.0090227
y2090	JAM	Developing country	0.810399	0.321394	0.359038	0.362698	0.317035
y2090	CHL	Developed income	18.7773	16.3652	17.7056	17.7841	16.4358
y2090	HTI	Developing country	5.51911	1.96485	2.25756	2.32566	2.26764
y2090	BRA	Developing country	298.651	213.019	273.008	275.649	185.887
y2090	ARG	Developing country	182.236	40.357	128.527	114	39.4936
y2090	VEN	Developing country	67.5133	45.348	67.3174	67.9489	43.409
y2090	DOM	Developing country	8.51599	3.42043	3.78889	3.72432	3.17851
y2090	BOL	Developing country	12.2622	9.96467	10.7636	10.1289	10.248
y2090	PRY	Developing country	6.75079	5.6096	6.3509	6.40333	5.54121
y2090	TTO	Developing country	1.70867	0.340018	1.70797	1.70798	0.328862
y2090	FLK	Developing country	8e-15	7e-15	7e-15	7e-15	7e-15
y2090	GUY	Developing country	12.2021	7.87662	12.1835	12.2267	7.73075
y2090	URY	Developed income	80.7608	9.09929	55.401	57.8643	9.14279
y2090	SUR	Developing country	1.8456	3.34995	1.8455	2.27147	3.35361
y2090	GUF	Developing country	0.20992	2.43656	0.210002	0.668211	2.43778
y2090	SGS	Developing country	1e-15	0	1e-15	1e-15	0
y2090	MAR	Developing country	33.4026	33.4647	33.402	33.3954	33.3995
y2090	TUN	Developing country	4.80214	4.74872	4.80313	4.79586	4.8017
y2090	SAU	Developing country	6.40989	6.05216	6.4473	6.44725	6.28568
y2090	ISR	Developing country	1.23742	1.23742	1.23742	1.23742	1.23742
y2090	JOR	Developing country	0.672618	0.672618	0.672618	0.672618	0.672618
y2090	LBN	Developing country	1.37232	1.37232	1.37232	1.37232	1.37232
y2090	SYR	Developing country	4.77004	4.7759	4.77009	4.77004	4.77
y2090	IRQ	Developing country	5.55818	5.54629	5.55861	5.55677	5.55739
y2090	YEM	Developing country	4.75894	4.66755	4.76848	4.76848	4.73012
y2090	KWT	Developing country	0.172524	0.172462	0.172524	0.172524	0.172524
y2090	QAT	Developing country	0.00375983	0.00375983	0.00375983	0.00375983	0.00375983
y2090	OMN	Developing country	0.167924	0.142619	0.170566	0.170566	0.160903
y2090	ARE	Developed income	0.0854712	0.0854732	0.0854712	0.0854712	0.0854712
y2090	PAK	Developing country	86.9208	87.7479	88.4238	88.3282	87.9481
y2090	CAN	Developed income	69.474	69.586	69.4798	69.4733	69.5333
y2090	PRI	Developing country	0.786359	0.25479	0.301925	0.30809	0.240534
y2090	AUS	Developed income	22.436	22.3232	39.396	33.6238	21.1673
y2090	JPN	Developing country	30.7276	32.0349	32.6194	32.3226	31.958
y2090	NZL	Developing country	13.1792	13.1141	13.1269	13.131	13.0957
y2090	IDN	Developing country	118.905	113.028	112.306	112.017	123.548
y2090	MYS	Developing country	20.5566	18.7782	18.5797	18.4931	21.8734
y2090	SGP	Developing country	0.0620988	0.0560356	0.0553581	0.0550628	0.0665888
y2090	BRN	Developed income	0.109625	0.0989215	0.0977254	0.0972041	0.117551
y2090	PHL	Developing country	28.2184	26.7319	27.847	28.0294	28.7002
y2090	TLS	Developing country	1.0256	1.0203	1.02027	1.0267	1.23031
y2090	KOR	Developing country	7.04329	8.026	7.92377	7.15782	8.02095
y2090	PNG	Developing country	5.9333	6.17585	5.99317	5.97769	6.69865
y2090	SLB	Developing country	0.0887299	0.0800665	0.0790985	0.0786765	0.0951455
y2090	NCL	Developing country	0.186508	0.160843	0.211078	0.211614	0.10952
y2090	VUT	Developing country	0.0502639	0.0453562	0.0448078	0.0445688	0.0538982
y2090	FJI	Developing country	0.35962	0.330187	0.326898	0.325465	0.381416
y2090	REU	Developing country	0.0113192	0.0111892	0.0112403	0.011261	0.0111271
y2090	LKA	Developing country	18.603	20.1075	19.2289	19.2244	20.7261
y2090	BGD	Developing country	59.727	63.1128	60.54	60.7265	64.6198
y2090	BTN	Developing country	0.364562	0.370363	0.360663	0.347298	0.401007
y2100	SEN	Developing country	20.1001	8.24751	20.6734	21.3531	8.68602
y2100	GMB	Developing country	0.0820308	0.0758738	0.082459	0.0740371	0.0901754
y2100	MRT	Developing country	5.60207	4.17735	5.02271	4.65325	4.15308
y2100	ESH	Developing country	2.6e-14	2.5e-14	2.6e-14	2.6e-14	2.4e-14
y2100	GNB	Developing country	0.528686	0.466267	0.530263	0.475742	0.53833
y2100	GIN	Developing country	9.74231	8.64501	9.50356	8.80854	9.10284
y2100	SLE	Developing country	8.69172	4.42033	6.72581	4.43618	4.42973
y2100	MLI	Developing country	38.6981	8.24896	31.6982	22.1926	8.89528
y2100	LBR	Developing country	9.04333	4.31884	6.8574	4.32849	4.34757
y2100	CIV	Developing country	30.8087	38.0489	34.2701	38.1488	38.1941
y2100	BFA	Developing country	24.6447	4.59299	20.4671	14.6322	5.30651
y2100	GHA	Developing country	21.8945	24.6671	23.2326	24.6498	24.8836
y2100	TGO	Developing country	5.34504	7.49662	6.24678	7.29981	7.31924
y2100	NER	Developing country	62.8298	46.3115	69.7768	79.6345	47.2196
y2100	BEN	Developing country	4.56961	4.52096	4.85497	5.13864	5.3785
y2100	DZA	Developing country	3.33319	3.24715	3.33231	3.332	3.24273
y2100	NGA	Developing country	94.4746	75.9653	107.671	124.883	75.5384
y2100	CMR	Developing country	40.7868	32.8235	37.5624	35.7717	25.3477
y2100	GAB	Developing country	2.15489	2.15948	2.15337	2.15299	2.16209
y2100	GNQ	Developing country	0.703297	0.56451	0.643162	0.569324	0.635703
y2100	NAM	Developing country	2.64775	2.67438	2.42765	2.43114	2.33157
y2100	AGO	Developing country	8.93087	8.66736	8.13157	8.00804	7.91394
y2100	COG	Developing country	5.3644	2.93776	4.24187	2.94184	2.94568
y2100	COD	Developing country	35.1979	31.6663	32.0642	32.309	31.6669
y2100	LBY	Developing country	8.77193	8.76651	8.76992	8.76836	8.70487
y2100	TCD	Developing country	88.135	18.9498	50.2606	30.1017	11.8671
y2100	CAF	Developing country	19.043	5.8275	8.97345	5.86151	4.37651
y2100	ZAF	Developing country	40.1669	38.6322	39.3394	39.3352	39.499
y2100	BWA	Developing country	2.19217	2.39653	2.18414	2.18526	2.18389
y2100	ZMB	Developing country	7.9535	7.90962	7.60421	7.87155	7.1085
y2100	SDN	Developing country	48.3147	41.2778	45.7421	45.0793	43.7039
y2100	ZWE	Developing country	8.87119	9.06856	9.1484	9.14858	9.092
y2100	LSO	Developing country	1.00163	1.0011	1.00106	1.00113	1.00139
y2100	BDI	Developing country	1.63368	1.75482	1.68312	1.68089	1.71718
y2100	RWA	Developing country	0.951343	1.05962	0.994764	0.992825	1.02576
y2100	TZA	Developing country	15.6141	15.5352	13.6766	15.4729	10.675
y2100	UGA	Developing country	9.0647	9.48669	9.23066	9.22235	9.35247
y2100	MOZ	Developing country	8.26948	8.8587	8.69077	8.69212	8.66598
y2100	SWZ	Developing country	0.166976	0.164029	0.16403	0.164031	0.164799
y2100	MWI	Developing country	0.959454	0.946943	0.925262	0.925323	0.963622
y2100	ETH	Developing country	22.969	22.9269	22.9726	22.9402	22.4072
y2100	EGY	Developing country	41.6187	41.3293	41.4807	41.5373	40.9969
y2100	KEN	Developing country	20.0375	19.9355	19.8228	19.7532	20.1324
y2100	ERI	Developing country	4.41562	3.74566	4.19034	3.98539	3.74933
y2100	SOM	Developing country	26.4568	25.4554	26.4208	26.3838	22.8097
y2100	DJI	Developing country	0.00682862	0.00645857	0.0064614	0.00646139	0.00645795
y2100	MDG	Developing country	14.5921	13.3665	14.4096	14.3422	14.0855
y2100	MUS	Developing country	0	0	0	0	0
y2100	ATF	Developing country	0	0	0	0	0
y2100	CHN	Developing country	485.226	430.596	437.274	422.51	470.563
y2100	IND	Developing country	736.714	731.189	725.326	726.568	727.113
y2100	NPL	Developing country	21.2765	23.2725	22.133	21.9954	23.5669
y2100	MNG	Developing country	1.56151	1.2256	1.59767	1.55497	1.26072
y2100	MMR	Developing country	94.281	82.4788	102.268	103.647	62.0471
y2100	LAO	Developing country	59.958	66.9982	64.9109	64.8029	66.4858
y2100	THA	Developing country	88.6252	83.5312	95.0299	97.391	75.5666
y2100	KHM	Developing country	28.7495	25.3376	31.2329	31.7698	19.4895
y2100	VNM	Developing country	95.7711	105.851	100.074	99.6355	107.914
y2100	RUS	Developing country	166.01	165.232	166.08	165.751	159.739
y2100	PRK	Developing country	6.95789	7.04483	6.84403	6.37561	7.03734
y2100	GRL	Developed income	1.09284	1.09284	1.09284	1.09284	1.09284
y2100	ISL	Developing country	0.932242	0.932043	0.932176	0.932176	0.931926
y2100	ESP	Developed income	25.5551	23.5972	24.2648	24.0459	23.5633
[truncated: 113 more rows]

## Sheet: Global-level
Year	BaU	EAT	HUS	MED	VEG
2020	4448.13	4448.13	4448.13	4448.13	4448.13
2025	4554.03	4563.71	4591.79	4573.18	4546.61
2030	4643.82	4547.45	4666.15	4690.06	4525.04
2035	4642.31	4475.78	4738.68	4710.86	4427.91
2040	4655.82	4541.86	4727.38	4711.4	4374.93
2045	4796.03	4536.9	4808.64	4782.6	4335.29
2050	5151.86	4574.75	5074.41	4904.54	4480.4
2055	5170.64	4541.85	5070.81	4966.76	4447.81
2060	5175.64	4465.23	5074.76	4999.75	4428.83
2070	5203.03	4412.76	4950.44	5023.53	4339.93
2080	5181.13	4388.79	4884.2	4907.59	4316.13
2090	4979.72	4185.13	4673.14	4653.01	4093.28
2100	4741.11	4002.32	4440.07	4445.59	3910.13
