# Supplementary material for: Transitioning to healthy and sustainable diets has high environmental and affordability trade-offs for developing countries
Source: Research Square preprint supplement (doi:10.21203/rs.3.rs-3278140/v1), 2023-08-29
Supplement: Supplementary file 5 [file 544606801a65945666ffaf8c.xlsx]

## Sheet: Country-level
EAT	Income-group	y2020	y2025	y2030	y2035	y2040	y2045	y2050	y2055	y2060	y2070	y2080	y2090	y2100		HUS	y2020	y2025	y2030	y2035	y2040	y2045	y2050	y2055	y2060	y2070	y2080	y2090	y2100		MED	y2020	y2025	y2030	y2035	y2040	y2045	y2050	y2055	y2060	y2070	y2080	y2090	y2100		VEG	y2020	y2025	y2030
SEN	Developing country	0.143322	0.106051	0.126047	0.117645	0.103329	0.089355	0.0716024	0.048574	0.0376625	0.0242645	0.0170618	0.0122679	0.00915365		SEN	0.143322	0.142865	0.138543	0.137496	0.124543	0.107246	0.0884234	0.0639686	0.0520509	0.034742	0.0240718	0.0174337	0.0128311		SEN	0.156643	0.144578	0.141542	0.145641	0.125444	0.111263	0.0911537	0.0729855	0.0546702	0.0364496	0.0257624	0.0182128	0.0135983		SEN	0.156643	0.121999	0.119185
GMB	Developing country	0.171694	0.154029	0.167186	0.139351	0.11229	0.0914581	0.0704329	0.0466525	0.0357517	0.0229995	0.0163899	0.0120073	0.00913208		GMB	0.171694	0.207497	0.18376	0.162865	0.135343	0.10977	0.0869792	0.0614381	0.0494102	0.0329309	0.0231238	0.0170634	0.0128009		GMB	0.218496	0.209985	0.187737	0.172513	0.136322	0.113881	0.0896649	0.0700983	0.0518966	0.0345494	0.0247478	0.0178259	0.0135662		GMB	0.218496	0.148143	0.158084
MRT	Developing country	0.166441	0.0784054	0.0944589	0.0888098	0.0790705	0.0694037	0.056676	0.0394053	0.0314604	0.0216209	0.0162841	0.0125332	0.00999318		MRT	0.166441	0.105622	0.103823	0.103795	0.0953037	0.0833	0.0699905	0.0518941	0.0434795	0.030957	0.0229744	0.0178107	0.014008		MRT	0.111218	0.106889	0.10607	0.109944	0.0959931	0.0864196	0.0721516	0.059209	0.0456674	0.0324785	0.024588	0.0186067	0.0148455		MRT	0.111218	0.0754093	0.0893163
ESH	Developing country	0.0974556	0.0901954	0.0875614	0.0880947	0.0853698	0.0849031	0.0825898	0.0834815	0.0840718	0.0851693	0.0856841	0.0857195	0.0829594		ESH	0.0974556	0.0992161	0.107372	0.128682	0.136917	0.140852	0.139871	0.130756	0.131454	0.12468	0.123713	0.124365	0.121393		ESH	0.0986385	0.0960641	0.105842	0.122156	0.128886	0.133888	0.143725	0.138421	0.13803	0.13053	0.129882	0.13029	0.127736		ESH	0.0986385	0.0858729	0.0809881
GNB	Developing country	0.285398	0.250841	0.26486	0.209868	0.159698	0.122557	0.089196	0.0560757	0.0409505	0.0241379	0.0159752	0.0109756	0.00791846		GNB	0.285398	0.337915	0.291117	0.24528	0.192485	0.147096	0.11015	0.0738478	0.0565951	0.0345609	0.0225387	0.0155972	0.0110997		GNB	0.344513	0.341967	0.297418	0.25981	0.193877	0.152605	0.113551	0.0842573	0.059443	0.0362595	0.0241217	0.0162942	0.0117633		GNB	0.344513	0.241255	0.250441
GIN	Developing country	0.286112	0.211151	0.17177	0.115348	0.0812508	0.0606712	0.0441442	0.0281921	0.0211432	0.013395	0.00961662	0.00715842	0.00555813		GIN	0.286112	0.284447	0.188798	0.134811	0.0979316	0.072819	0.0545147	0.0371271	0.0292206	0.0191791	0.0135676	0.0101727	0.00779112		GIN	0.308505	0.287858	0.192885	0.142797	0.0986399	0.0755462	0.0561979	0.0423604	0.030691	0.0201217	0.0145205	0.0106273	0.00825692		GIN	0.308505	0.203082	0.162419
SLE	Developing country	0.293532	0.265721	0.293249	0.245557	0.196245	0.15695	0.117985	0.0760181	0.0564995	0.0339958	0.0226676	0.015595	0.0112286		SLE	0.293532	0.35796	0.32232	0.286991	0.236534	0.188375	0.145703	0.100111	0.0780844	0.0486754	0.0319807	0.0221617	0.0157397		SLE	0.369249	0.362252	0.329296	0.303992	0.238244	0.19543	0.150202	0.114222	0.0820137	0.0510678	0.0342268	0.0231521	0.0166807		SLE	0.369249	0.255567	0.277284
MLI	Developing country	0.352644	0.190828	0.228155	0.211733	0.184074	0.156888	0.123522	0.0822513	0.0625353	0.0386915	0.0261305	0.0181316	0.013073		MLI	0.352644	0.25707	0.250773	0.24746	0.221864	0.1883	0.15254	0.108319	0.0864261	0.0553987	0.0368664	0.0257665	0.0183251		MLI	0.256222	0.260152	0.256201	0.262119	0.223469	0.195352	0.15725	0.123588	0.0907751	0.0581215	0.0394556	0.026918	0.0194207		MLI	0.256222	0.183536	0.215734
LBR	Developing country	0.272113	0.362909	0.375184	0.299965	0.232077	0.180725	0.132911	0.0840077	0.0613383	0.0357637	0.0232857	0.0157328	0.0111321		LBR	0.272113	0.488885	0.412378	0.35058	0.279722	0.216911	0.164135	0.110632	0.0847718	0.0512067	0.0328527	0.0223575	0.0156044		LBR	0.492644	0.494747	0.421303	0.371348	0.281746	0.225035	0.169203	0.126227	0.0890376	0.0537235	0.0351601	0.0233567	0.0165373		LBR	0.492644	0.349041	0.354758
CIV	Developing country	0.172119	0.0935189	0.0954297	0.0762813	0.0599541	0.0481292	0.0370455	0.0247307	0.0192207	0.0128534	0.00956829	0.00733278	0.00584789		CIV	0.172119	0.125982	0.10489	0.0891525	0.0722627	0.0577659	0.0457484	0.0325686	0.0265638	0.0184036	0.0134995	0.0104205	0.00819729		CIV	0.137491	0.127493	0.10716	0.0944338	0.0727854	0.0599293	0.0471609	0.0371594	0.0279005	0.0193081	0.0144476	0.0108862	0.00868738		CIV	0.137491	0.0899452	0.0902343
BFA	Developing country	0.369815	0.184249	0.210401	0.185491	0.154561	0.127517	0.0982526	0.0645473	0.0487317	0.0299419	0.0202664	0.0142043	0.0104196		BFA	0.369815	0.248207	0.231259	0.21679	0.186292	0.153048	0.121334	0.0850043	0.067349	0.0428709	0.028593	0.0201855	0.0146058		BFA	0.258955	0.251183	0.236264	0.229632	0.18764	0.15878	0.125081	0.0969864	0.0707381	0.044978	0.0306011	0.0210875	0.015479		BFA	0.258955	0.177208	0.198946
GHA	Developing country	0.212461	0.13086	0.143916	0.122853	0.101151	0.0839083	0.0657171	0.0440743	0.0340617	0.022103	0.015876	0.0117326	0.00903421		GHA	0.212461	0.176286	0.158183	0.143583	0.121918	0.100709	0.0811555	0.0580429	0.0470746	0.0316472	0.0223988	0.0166729	0.0126637		GHA	0.185622	0.178399	0.161606	0.152089	0.1228	0.10448	0.0836613	0.0662245	0.0494434	0.0332026	0.0239719	0.017418	0.0134209		GHA	0.185622	0.12586	0.13608
TGO	Developing country	0.254607	0.226856	0.259688	0.235037	0.199573	0.166433	0.128641	0.0841444	0.0627947	0.0370726	0.0236659	0.0155314	0.0106769		TGO	0.254607	0.305604	0.285432	0.274695	0.240546	0.199757	0.158861	0.110812	0.0867846	0.0530808	0.0333892	0.0220714	0.0149663		TGO	0.331832	0.309268	0.29161	0.290968	0.242286	0.207239	0.163766	0.126432	0.0911517	0.0556897	0.0357342	0.0230577	0.0158611		TGO	0.331832	0.218187	0.24555
NER	Developing country	0.475004	0.259622	0.314505	0.297818	0.263433	0.226928	0.178882	0.11748	0.0870282	0.0500767	0.0312599	0.020093	0.0135734		NER	0.475004	0.349744	0.345683	0.34807	0.317515	0.272364	0.220905	0.154713	0.120276	0.0717001	0.0441032	0.0285538	0.0190265		NER	0.399657	0.353937	0.353165	0.368689	0.319812	0.282564	0.227726	0.176522	0.126329	0.0752241	0.0472006	0.0298298	0.020164		NER	0.399657	0.249701	0.297383
BEN	Developing country	0.155889	0.115686	0.140833	0.137462	0.125577	0.112027	0.0919239	0.063389	0.049601	0.0318618	0.0219862	0.0153588	0.0110667		BEN	0.155889	0.155844	0.154795	0.160657	0.151358	0.134457	0.113519	0.0834789	0.0685504	0.0456199	0.0310194	0.0218261	0.0155128		BEN	0.170532	0.157713	0.158145	0.170174	0.152453	0.139493	0.117024	0.095246	0.0719999	0.0478621	0.0331979	0.0228015	0.0164402		BEN	0.170532	0.111266	0.133166
DZA	Developing country	0.0300407	0.0324941	0.0291363	0.027103	0.0247021	0.0228204	0.020207	0.0183292	0.0163846	0.0129413	0.0103708	0.00842491	0.006702		DZA	0.0300407	0.0357439	0.0357283	0.0395899	0.0396176	0.0378583	0.0342217	0.0287087	0.0256188	0.0189449	0.0149736	0.0122232	0.00980696		DZA	0.0336025	0.0346083	0.0352192	0.0375822	0.0372936	0.0359865	0.0351648	0.0303916	0.0269004	0.0198338	0.0157203	0.0128055	0.0103193		DZA	0.0336025	0.0309368	0.026949
NGA	Developing country	0.0877189	0.0772784	0.0929281	0.0860643	0.0757118	0.0659895	0.0535578	0.036687	0.0286773	0.0187256	0.0133409	0.00977543	0.00748055		NGA	0.0877189	0.104104	0.102141	0.100586	0.0912554	0.0792022	0.0661398	0.0483143	0.0396331	0.0268115	0.0188221	0.0138917	0.0104859		NGA	0.09593	0.105352	0.104351	0.106545	0.0919155	0.0821685	0.068182	0.0551246	0.0416275	0.0281293	0.020144	0.0145125	0.0111128		NGA	0.09593	0.0743253	0.087869
CMR	Developing country	0.175809	0.11462	0.127487	0.110177	0.0912917	0.0759748	0.059657	0.0402068	0.0312325	0.0204793	0.0148214	0.0109609	0.00840127		CMR	0.175809	0.154407	0.140125	0.128767	0.110034	0.0911867	0.0736719	0.0529495	0.0431645	0.0293224	0.0209109	0.0155763	0.0117765		CMR	0.158442	0.156259	0.143158	0.136395	0.11083	0.0946018	0.0759466	0.0604132	0.0453365	0.0307636	0.0223795	0.0162724	0.0124806		CMR	0.158442	0.11024	0.120546
GAB	Developing country	0.053816	0.0244574	0.0299121	0.0286028	0.0260033	0.0236123	0.0201558	0.0147415	0.0124094	0.00938274	0.00765076	0.00630254	0.00532228		GAB	0.053816	0.0329472	0.0328774	0.0334291	0.0313418	0.02834	0.0248908	0.0194135	0.0171502	0.0134343	0.0107941	0.00895643	0.00746052		GAB	0.0330805	0.0333423	0.033589	0.0354094	0.0315685	0.0294014	0.0256594	0.02215	0.0180133	0.0140945	0.0115522	0.00935668	0.00790656		GAB	0.0330805	0.0235228	0.0282836
GNQ	Developing country	0.0647144	0.0307387	0.0381615	0.0322108	0.0264754	0.0224382	0.0182777	0.0129684	0.010683	0.00793992	0.00652615	0.00546865	0.00468599		GNQ	0.0647144	0.041409	0.0419446	0.0376458	0.0319108	0.0269309	0.0225716	0.0170785	0.0147643	0.0113684	0.00920744	0.00777139	0.00656859		GNQ	0.0297598	0.0419055	0.0428525	0.0398759	0.0321416	0.0279395	0.0232685	0.0194859	0.0155073	0.0119272	0.0098541	0.00811869	0.00696131		GNQ	0.0297598	0.0295641	0.0360839
NAM	Developing country	0.0874488	0.0505149	0.059742	0.0530878	0.04574	0.0399295	0.0331265	0.0237256	0.0196855	0.0146823	0.0119268	0.00981742	0.0082639		NAM	0.0874488	0.0680501	0.0656645	0.0620455	0.0551304	0.0479244	0.0409087	0.031245	0.027206	0.0210222	0.016827	0.0139514	0.0115839		NAM	0.0575671	0.0688661	0.0670858	0.065721	0.0555292	0.0497192	0.0421718	0.0356492	0.0285751	0.0220554	0.0180088	0.0145748	0.0122765		NAM	0.0575671	0.0485846	0.0564896
AGO	Developing country	0.0873153	0.0766864	0.107516	0.122302	0.124743	0.117209	0.0967339	0.0656393	0.0502559	0.0310963	0.0210473	0.014768	0.0108143		AGO	0.0873153	0.103306	0.118175	0.142939	0.150353	0.140677	0.119459	0.0864424	0.0694556	0.0445239	0.0296946	0.0209865	0.0151589		AGO	0.0920628	0.104545	0.120733	0.151406	0.15144	0.145945	0.123147	0.0986272	0.0729507	0.0467122	0.0317802	0.0219244	0.0160652		AGO	0.0920628	0.0737559	0.101663
COG	Developing country	0.0788299	0.110126	0.113096	0.0862314	0.0664629	0.0533465	0.0413043	0.0278274	0.0218109	0.0148086	0.011167	0.00861254	0.00687219		COG	0.0788299	0.148354	0.124307	0.100782	0.0801078	0.0640278	0.0510076	0.0366468	0.0301434	0.021203	0.015755	0.0122391	0.00963311		COG	0.13483	0.150133	0.126998	0.106752	0.0806872	0.0664257	0.0525826	0.0418125	0.0316603	0.0222451	0.0168615	0.0127861	0.010209		COG	0.13483	0.105918	0.106939
COD	Developing country	0.313303	0.437091	0.447689	0.351965	0.266646	0.203629	0.147758	0.092666	0.0673657	0.0391922	0.0255135	0.0173989	0.0124735		COD	0.313303	0.588818	0.49207	0.411353	0.321389	0.2444	0.18247	0.122035	0.0931019	0.0561157	0.0359958	0.0247252	0.0174848		COD	0.623556	0.595878	0.50272	0.435722	0.323714	0.253553	0.188104	0.139236	0.0977868	0.0588737	0.0385239	0.0258302	0.0185301		COD	0.623556	0.420389	0.423316
LBY	Developing country	0.0326245	0.0121163	0.0105084	0.00979397	0.00891347	0.00844532	0.00787149	0.00756463	0.00716477	0.00630847	0.005538	0.00482895	0.00406168		LBY	0.0326245	0.0133281	0.0128859	0.0143063	0.0142955	0.0140105	0.0133308	0.0118484	0.0112028	0.00923502	0.00799589	0.00700602	0.00594341		LBY	0.0192588	0.0129047	0.0127022	0.0135808	0.013457	0.0133178	0.0136982	0.0125429	0.0117632	0.0096683	0.0083946	0.00733983	0.00625393		LBY	0.0192588	0.0115357	0.0097195
TCD	Developing country	0.206213	0.248638	0.282878	0.238129	0.18883	0.149815	0.111814	0.0717007	0.0530658	0.0316052	0.0208882	0.0143477	0.0102986		TCD	0.206213	0.334947	0.310921	0.27831	0.227597	0.179812	0.138082	0.0944248	0.0733389	0.0452526	0.0294702	0.0203892	0.014436		TCD	0.310975	0.338964	0.31765	0.294797	0.229243	0.186546	0.142345	0.107735	0.0770294	0.0474767	0.03154	0.0213004	0.0152991		TCD	0.310975	0.239137	0.267477
CAF	Developing country	0.904339	0.496889	0.514384	0.402794	0.305669	0.235108	0.171669	0.108265	0.0790644	0.0461215	0.0297605	0.0198297	0.0137951		CAF	0.904339	0.669374	0.565377	0.470759	0.368422	0.282182	0.211998	0.142577	0.10927	0.066037	0.0419878	0.0281796	0.0193374		CAF	0.674824	0.6774	0.577614	0.498646	0.371087	0.29275	0.218544	0.162674	0.114768	0.0692827	0.0449367	0.0294389	0.0204935		CAF	0.674824	0.477902	0.48638
ZAF	Developing country	0.0780795	0.0355502	0.0414758	0.0366801	0.0317173	0.0280491	0.0236815	0.0172318	0.0144572	0.0110007	0.00908995	0.00762444	0.00654231		ZAF	0.0780795	0.0478906	0.0455875	0.0428693	0.0382289	0.0336652	0.0292448	0.0226931	0.0199803	0.0157509	0.0128246	0.0108349	0.0091707		ZAF	0.0439619	0.0484649	0.0465742	0.0454088	0.0385055	0.034926	0.0301478	0.0258918	0.0209858	0.016525	0.0137253	0.0113192	0.00971898		ZAF	0.0439619	0.0341917	0.0392178
BWA	Developing country	0.0455661	0.0225161	0.0271151	0.0257623	0.0235497	0.0217255	0.0189549	0.0141924	0.0122258	0.00970285	0.00830534	0.00715113	0.00628095		BWA	0.0455661	0.030332	0.0298031	0.0301093	0.0283844	0.0260755	0.0234079	0.0186904	0.0168966	0.0138926	0.0117176	0.0101623	0.00880433		BWA	0.0306782	0.0306958	0.0304482	0.0318929	0.0285897	0.027052	0.0241306	0.0213249	0.0177468	0.0145754	0.0125406	0.0106165	0.00933072		BWA	0.0306782	0.0216557	0.0256389
ZMB	Developing country	0.105733	0.129941	0.152298	0.133161	0.110716	0.0916078	0.0711042	0.0471989	0.0360538	0.0227385	0.0157966	0.0113579	0.00853046		ZMB	0.105733	0.175047	0.167396	0.15563	0.133446	0.10995	0.0878082	0.0621577	0.0498277	0.0325572	0.0222867	0.0161404	0.0119576		ZMB	0.147877	0.177146	0.171019	0.164849	0.134411	0.114068	0.0905195	0.0709193	0.0523351	0.0341573	0.023852	0.0168617	0.0126725		ZMB	0.147877	0.124975	0.144007
SDN	Developing country	0.102778	0.0879357	0.0732013	0.0637635	0.0526933	0.0440288	0.0356306	0.0297719	0.0246562	0.0168136	0.01156	0.00810039	0.00566079		SDN	0.102778	0.0967304	0.0897628	0.0931408	0.0845101	0.0730424	0.0603425	0.0466313	0.0385522	0.0246136	0.0166906	0.0117523	0.00828337		SDN	0.102012	0.0936573	0.0884838	0.0884173	0.0795528	0.0694311	0.0620056	0.0493647	0.0404807	0.0257684	0.0175229	0.0123123	0.00871614		SDN	0.102012	0.0837215	0.067706
ZWE	Developing country	0.391111	0.283933	0.341302	0.310254	0.259239	0.209912	0.156803	0.0993312	0.0722941	0.0415638	0.0265902	0.0177771	0.0125532		ZWE	0.391111	0.382495	0.375137	0.362605	0.312461	0.251942	0.193639	0.130812	0.0999131	0.0595113	0.0375149	0.0252627	0.0175965		ZWE	0.355112	0.387081	0.383256	0.384085	0.314721	0.261377	0.199618	0.149251	0.104941	0.0624363	0.0401496	0.0263917	0.0186486		ZWE	0.355112	0.273083	0.322721
LSO	Developing country	0.1965	0.185991	0.204773	0.167998	0.13151	0.103688	0.0775075	0.0499467	0.0372733	0.0226454	0.0152375	0.0106357	0.00777616		LSO	0.1965	0.250554	0.225073	0.196345	0.158509	0.124449	0.0957158	0.0657764	0.0515131	0.0324238	0.0214979	0.0151142	0.0109002		LSO	0.22461	0.253558	0.229945	0.207976	0.159655	0.12911	0.0986712	0.0750481	0.0541053	0.0340174	0.0230078	0.0157897	0.0115519		LSO	0.22461	0.178884	0.193625
BDI	Developing country	0.383768	0.656595	0.635034	0.457444	0.32591	0.240089	0.17043	0.10509	0.0751296	0.0422833	0.0269239	0.0179726	0.012575		BDI	0.383768	0.884517	0.697988	0.53463	0.392819	0.288161	0.210468	0.138396	0.103832	0.0605414	0.0379858	0.0255406	0.017627		BDI	0.862435	0.895124	0.713095	0.566301	0.39566	0.298953	0.216966	0.157904	0.109057	0.063517	0.0406536	0.026682	0.0186809		BDI	0.862435	0.631504	0.600461
RWA	Developing country	0.241933	0.16826	0.18834	0.166593	0.141146	0.119561	0.0949751	0.0641431	0.0495244	0.0318365	0.0225281	0.0162604	0.0121165		RWA	0.241933	0.226667	0.207011	0.194702	0.170123	0.143501	0.117287	0.084472	0.0684446	0.0455837	0.0317838	0.0231073	0.0169843		RWA	0.257381	0.229385	0.211491	0.206236	0.171353	0.148875	0.120908	0.096379	0.0718888	0.0478241	0.0340161	0.02414	0.0179997		RWA	0.257381	0.16183	0.178086
TZA	Developing country	0.181767	0.133533	0.151994	0.135785	0.115925	0.0985397	0.0784101	0.0531599	0.0413543	0.0269466	0.0192032	0.0139892	0.0104954		TZA	0.181767	0.179886	0.167062	0.158697	0.139725	0.11827	0.0968304	0.0700079	0.0571531	0.0385823	0.0270929	0.0198798	0.0147119		TZA	0.186138	0.182043	0.170678	0.168098	0.140736	0.122699	0.0998202	0.0798761	0.0600291	0.0404786	0.0289957	0.0207683	0.0155915		TZA	0.186138	0.12843	0.143719
UGA	Developing country	0.342168	0.226685	0.243885	0.203924	0.163245	0.131043	0.0990294	0.0641067	0.0478591	0.0289758	0.0193989	0.0134265	0.00970968		UGA	0.342168	0.305374	0.268062	0.238333	0.196759	0.15728	0.122294	0.0844241	0.066143	0.0414878	0.027369	0.0190802	0.0136106		UGA	0.32868	0.309035	0.273864	0.252452	0.198182	0.163171	0.12607	0.0963244	0.0694714	0.0435269	0.0292912	0.0199328	0.0144243		UGA	0.32868	0.218023	0.230607
MOZ	Developing country	0.273947	0.30582	0.296235	0.239069	0.186542	0.146168	0.107978	0.068573	0.0503769	0.0296534	0.0192641	0.0128696	0.00896828		MOZ	0.273947	0.411979	0.325602	0.279409	0.22484	0.175435	0.133345	0.0903058	0.0696227	0.0424579	0.0271789	0.0182887	0.0125713		MOZ	0.426036	0.416919	0.33265	0.29596	0.226466	0.182005	0.137462	0.103035	0.0731262	0.0445447	0.0290877	0.019106	0.0133229		MOZ	0.426036	0.294134	0.280107
SWZ	Developing country	0.0700257	0.0437853	0.0555453	0.0551829	0.0515684	0.047405	0.0404657	0.0293166	0.0242322	0.0174123	0.0133708	0.0103723	0.00823151		SWZ	0.0700257	0.0589844	0.0610518	0.0644942	0.0621554	0.0568966	0.0499721	0.038608	0.0334898	0.024931	0.0188643	0.0147399	0.0115385		SWZ	0.0564417	0.0596917	0.0623732	0.0683147	0.062605	0.0590275	0.0515151	0.0440501	0.035175	0.0261564	0.0201892	0.0153986	0.0122284		SWZ	0.0564417	0.0421121	0.0525213
MWI	Developing country	0.30181	0.332262	0.366109	0.310504	0.250472	0.200896	0.150645	0.0962019	0.070575	0.0408629	0.0260233	0.0171608	0.0119144		MWI	0.30181	0.4476	0.402403	0.362897	0.301894	0.24112	0.186035	0.126691	0.0975373	0.0585078	0.036715	0.0243869	0.016701		MWI	0.443839	0.452967	0.411112	0.384395	0.304078	0.25015	0.191779	0.144549	0.102445	0.0613834	0.0392936	0.0254767	0.0176995		MWI	0.443839	0.319565	0.346177
ETH	Developing country	0.265142	0.21084	0.241307	0.206421	0.16658	0.133799	0.101043	0.0655206	0.0490481	0.0297291	0.0197821	0.0136234	0.00978964		ETH	0.265142	0.284029	0.265229	0.241252	0.200779	0.160589	0.124781	0.086286	0.0677863	0.0425663	0.0279097	0.0193599	0.0137226		ETH	0.271726	0.287434	0.270969	0.255543	0.202231	0.166603	0.128634	0.0984488	0.0711974	0.0446585	0.0298699	0.0202251	0.0145431		ETH	0.271726	0.202783	0.22817
EGY	Developing country	0.0436901	0.0322735	0.0265702	0.0229882	0.0192562	0.0166877	0.014263	0.0127234	0.0113502	0.00918275	0.00755218	0.00628364	0.00513931		EGY	0.0436901	0.0355012	0.0325816	0.0335794	0.0308834	0.0276844	0.0241552	0.0199286	0.017747	0.0134427	0.010904	0.00911653	0.00752029		EGY	0.0404659	0.0343734	0.0321173	0.0318765	0.0290718	0.0263157	0.024821	0.0210968	0.0186348	0.0140734	0.0114477	0.00955089	0.00791319		EGY	0.0404659	0.0307268	0.0245755
KEN	Developing country	0.226387	0.131626	0.152585	0.139389	0.120605	0.103459	0.0827723	0.0562456	0.0437626	0.0284694	0.0202945	0.0147669	0.0111314		KEN	0.226387	0.177317	0.167711	0.162909	0.145365	0.124174	0.102217	0.0740716	0.0604815	0.0407627	0.0286326	0.0209849	0.0156034		KEN	0.190303	0.179443	0.171341	0.172559	0.146416	0.128825	0.105374	0.0845126	0.063525	0.0427661	0.0306436	0.0219227	0.0165363		KEN	0.190303	0.126596	0.144278
ERI	Developing country	0.200269	0.147119	0.193689	0.211141	0.218639	0.22105	0.203478	0.154639	0.130287	0.0905182	0.062574	0.0416152	0.0279826		ERI	0.200269	0.198188	0.21289	0.246767	0.263526	0.265309	0.25128	0.203648	0.180062	0.129605	0.0882828	0.0591386	0.0392247		ERI	0.202569	0.200564	0.217498	0.261386	0.265432	0.275245	0.259039	0.232354	0.189123	0.135975	0.0944831	0.0617815	0.0415698		ERI	0.202569	0.141497	0.183144
SOM	Developing country	0.131829	0.0716816	0.0970098	0.110945	0.123187	0.136757	0.14221	0.125754	0.126612	0.131248	0.133404	0.121196	0.101255		SOM	0.131829	0.0965643	0.106627	0.129665	0.148477	0.164139	0.175618	0.16561	0.174982	0.187921	0.188214	0.172229	0.141935		SOM	0.0910321	0.0977222	0.108935	0.137346	0.149551	0.170286	0.181041	0.188954	0.183787	0.197157	0.201432	0.179926	0.15042		SOM	0.0910321	0.0689424	0.0917284
DJI	Developing country	0.102335	0.0443654	0.0528352	0.0513165	0.047313	0.0432263	0.0368419	0.0267224	0.0221744	0.0161984	0.0127553	0.0101429	0.00825436		DJI	0.102335	0.0597659	0.058073	0.0599753	0.0570264	0.0518813	0.0454969	0.0351916	0.0306458	0.023193	0.0179959	0.0144139	0.0115706		DJI	0.0678324	0.0604826	0.0593299	0.0635282	0.0574389	0.0538243	0.0469017	0.0401521	0.0321879	0.0243329	0.0192598	0.0150581	0.0122623		DJI	0.0678324	0.0426701	0.0499587
MDG	Developing country	0.251085	0.232468	0.272098	0.246363	0.208948	0.173724	0.133757	0.0875225	0.0656988	0.0398546	0.026552	0.0181647	0.0129372		MDG	0.251085	0.313165	0.299072	0.287933	0.251845	0.208508	0.165179	0.115261	0.0907982	0.0570641	0.0374611	0.0258135	0.0181348		MDG	0.319971	0.31692	0.305545	0.30499	0.253667	0.216317	0.170279	0.131508	0.0953672	0.0598688	0.040092	0.0269671	0.019219		MDG	0.319971	0.223585	0.257284
MUS	Developing country	0.0372298	0.0175048	0.0208885	0.0201039	0.0186558	0.017392	0.0152139	0.0114245	0.00986952	0.00782974	0.00658312	0.0055383	0.00473485		MUS	0.0372298	0.0235812	0.0229593	0.0234961	0.0224858	0.0208743	0.018788	0.0150452	0.01364	0.0112107	0.00928783	0.00787037	0.00663708		MUS	0.0249892	0.0238639	0.0234562	0.024888	0.0226484	0.0216561	0.0193681	0.017166	0.0143264	0.0117617	0.00994014	0.00822209	0.00703389		MUS	0.0249892	0.0168359	0.0197513
ATF	Developing country	0.0322657	0.0186813	0.0190891	0.0186471	0.0190957	0.0191192	0.0181017	0.0176882	0.0175938	0.0175384	0.0172384	0.0168944	0.0166395		ATF	0.0322657	0.0194925	0.0209429	0.0227378	0.0239428	0.0252195	0.0251776	0.0244187	0.0245255	0.0241161	0.0239288	0.0239546	0.023528		ATF	0.0177137	0.0196917	0.0213699	0.0235547	0.0248055	0.025628	0.0263308	0.0259974	0.0257078	0.0255902	0.0254581	0.0253753	0.0249643		ATF	0.0177137	0.0179059	0.0177477
CHN	Developing country	0.0369089	0.0323259	0.0202663	0.0131885	0.0104242	0.00818639	0.00659084	0.00604973	0.00557571	0.00467217	0.00410527	0.00366636	0.00327632		CHN	0.0369089	0.0340621	0.0216753	0.0158246	0.0126704	0.0103485	0.00869629	0.00785088	0.00708191	0.00588765	0.00504803	0.00458563	0.00406943		CHN	0.0368373	0.0343707	0.0222471	0.0167188	0.0132444	0.0113396	0.00962716	0.00881501	0.00769783	0.00652348	0.00571093	0.00515799	0.00463178		CHN	0.0368373	0.0316057	0.0193614
IND	Developing country	0.0449522	0.0420725	0.0367172	0.0330514	0.0277515	0.0238403	0.0204641	0.0177694	0.0156274	0.0122461	0.00993261	0.00829311	0.00686919		IND	0.0449522	0.0444018	0.0431773	0.0430995	0.036397	0.032194	0.0288211	0.0248406	0.0221705	0.0175318	0.0142673	0.0117482	0.00996661		IND	0.0449526	0.0450514	0.0442117	0.0449828	0.0384624	0.0340746	0.0303283	0.0265114	0.0234954	0.0186065	0.0150282	0.012387	0.0105344		IND	0.0449526	0.0393635	0.0346821
NPL	Developing country	0.096083	0.115418	0.104386	0.0929081	0.0853916	0.0752311	0.0616249	0.0514684	0.0433534	0.030502	0.0210773	0.0147797	0.0106736		NPL	0.096083	0.12043	0.114524	0.11329	0.107067	0.099235	0.085714	0.0710526	0.0604342	0.0419415	0.0292576	0.0209561	0.0150922		NPL	0.126426	0.12166	0.116859	0.11736	0.110924	0.100842	0.0896402	0.0756465	0.0633475	0.0445051	0.0311275	0.022199	0.0160136		NPL	0.126426	0.110628	0.0970508
MNG	Developing country	0.0694619	0.0285431	0.0234414	0.0185968	0.0159011	0.0136493	0.0113248	0.00982989	0.00871459	0.00703216	0.00587989	0.00500882	0.00433421		MNG	0.0694619	0.0297825	0.0257178	0.0226765	0.0199373	0.0180044	0.0157516	0.0135703	0.012148	0.00966951	0.00816196	0.007102	0.00612848		MNG	0.0321333	0.0300868	0.0262422	0.0234912	0.0206556	0.018296	0.0164731	0.0144476	0.0127336	0.0102605	0.00868359	0.00752321	0.00650262		MNG	0.0321333	0.0273584	0.0217941
MMR	Developing country	0.103106	0.102311	0.0908573	0.0787325	0.0720282	0.064446	0.0546514	0.0479014	0.0427482	0.0343088	0.0271744	0.0215739	0.0173451		MMR	0.103106	0.106753	0.0996806	0.0960045	0.0903113	0.0850087	0.0760145	0.0661284	0.0595906	0.0471761	0.0377212	0.0305896	0.0245255		MMR	0.0857723	0.107844	0.101713	0.0994537	0.0935651	0.0863856	0.0794964	0.0704039	0.0624631	0.0500597	0.040132	0.0324038	0.0260228		MMR	0.0857723	0.0980642	0.0844724
LAO	Developing country	0.0743348	0.0575082	0.0486808	0.0405821	0.035561	0.0305681	0.0249982	0.0212499	0.0184743	0.0140631	0.0106464	0.0082242	0.00646909		LAO	0.0743348	0.0600053	0.0534083	0.0494848	0.0445875	0.0403214	0.0347699	0.0293356	0.025753	0.0193373	0.0147784	0.0116611	0.00914716		LAO	0.0633231	0.0606185	0.0544972	0.0512627	0.046194	0.0409745	0.0363626	0.0312323	0.0269945	0.0205193	0.0157229	0.0123527	0.00970558		LAO	0.0633231	0.0551212	0.0452598
THA	Developing country	0.0296532	0.0223218	0.0192958	0.0162556	0.0144791	0.0126909	0.0105922	0.00918117	0.00815342	0.00659785	0.00536924	0.00445415	0.00378027		THA	0.0296532	0.023291	0.0211696	0.0198217	0.0181543	0.0167402	0.0147327	0.0126747	0.0113658	0.00907231	0.00745312	0.00631553	0.00534522		THA	0.0238953	0.023529	0.0216012	0.0205338	0.0188084	0.0170113	0.0154075	0.0134942	0.0119137	0.00962685	0.00792945	0.0066901	0.00567154		THA	0.0238953	0.0213953	0.0179398
KHM	Developing country	0.0999299	0.0891008	0.0722351	0.0577163	0.0486363	0.0402693	0.0319128	0.0262153	0.0220843	0.0158953	0.0115262	0.00851961	0.00644103		KHM	0.0999299	0.0929698	0.07925	0.0703778	0.0609817	0.053118	0.0443875	0.0361905	0.0307853	0.0218566	0.0159996	0.0120799	0.00910748		KHM	0.102387	0.0939198	0.0808658	0.0729063	0.0631788	0.0539784	0.0464207	0.0385304	0.0322693	0.0231926	0.0170222	0.0127964	0.00966348		KHM	0.102387	0.0854026	0.0671589
VNM	Developing country	0.0815066	0.0469033	0.0396366	0.0336206	0.0299683	0.0261492	0.0216932	0.0186736	0.016397	0.0127187	0.009978	0.00795135	0.00646793		VNM	0.0815066	0.04894	0.0434858	0.0409961	0.0375752	0.0344926	0.0301731	0.0257791	0.0228572	0.0174887	0.0138506	0.0112742	0.00914552		VNM	0.0574183	0.0494401	0.0443725	0.042469	0.038929	0.0350512	0.0315552	0.0274458	0.0239591	0.0185577	0.0147358	0.0119429	0.00970384		VNM	0.0574183	0.0449565	0.0368512
RUS	Developing country	0.0372757	0.0291505	0.0217648	0.0150977	0.0108635	0.00904456	0.0069826	0.0064956	0.00594681	0.00518136	0.00451734	0.00397783	0.00348536		RUS	0.0372757	0.0304808	0.0250763	0.0198475	0.0154918	0.0133999	0.0119214	0.0110307	0.0100517	0.00846661	0.00714195	0.00641011	0.00496993		RUS	0.0330454	0.0306976	0.0251536	0.0196367	0.0162501	0.0136494	0.0123857	0.0118012	0.010828	0.00909453	0.00724537	0.00634396	0.00543158		RUS	0.0330454	0.0286943	0.0209413
PRK	Developing country	0.120012	0.196599	0.201425	0.204248	0.21923	0.230181	0.228611	0.234325	0.24447	0.268386	0.29088	0.313199	0.338155		PRK	0.120012	0.205136	0.220986	0.249054	0.274878	0.303624	0.317975	0.323488	0.340788	0.369042	0.403775	0.444084	0.478144		PRK	0.184119	0.207232	0.225492	0.258002	0.284782	0.308542	0.332539	0.344403	0.357216	0.3916	0.42958	0.470422	0.507334		PRK	0.184119	0.188439	0.18727
GRL	Developed income	0.00919469	0.00608648	0.00554496	0.0047041	0.00432107	0.0040314	0.0035179	0.0036826	0.00403675	0.00442991	0.0044291	0.0043513	0.00408815		GRL	0.00919469	0.00643348	0.00631425	0.00615669	0.00604643	0.00595224	0.0056267	0.00571302	0.00636754	0.00660192	0.00659695	0.00679792	0.00629089		GRL	0.00637565	0.00647211	0.00649437	0.00634343	0.00641678	0.00630987	0.0058841	0.00657273	0.00666913	0.00738011	0.00755667	0.00724567	0.0067474		GRL	0.00637565	0.00588021	0.0051906
ISL	Developing country	0.0182931	0.00926008	0.00774226	0.00602793	0.00506095	0.0043248	0.00347508	0.00335632	0.0033961	0.00315114	0.00268602	0.0022636	0.00181376		ISL	0.0182931	0.00978802	0.00881639	0.0078893	0.00708173	0.00638544	0.0055582	0.00520684	0.00535698	0.00469615	0.00400072	0.00353635	0.00279104		ISL	0.0102732	0.00984678	0.00906788	0.00812859	0.0075155	0.0067691	0.00581247	0.00599038	0.0056107	0.0052497	0.00458274	0.00376927	0.00299357		ISL	0.0102732	0.00894626	0.00724748
ESP	Developed income	0.020485	0.0182082	0.0149581	0.0110397	0.0089196	0.00721214	0.00587324	0.00565928	0.00540173	0.0050939	0.00445029	0.00388482	0.00331557		ESP	0.020485	0.0189751	0.0165092	0.0139766	0.012097	0.0107485	0.00989281	0.0094702	0.00887303	0.00772164	0.00669789	0.00581673	0.00486066		ESP	0.0216649	0.0190297	0.0169198	0.0146637	0.0128658	0.0115638	0.0103013	0.0101599	0.00955398	0.00841977	0.00729729	0.0063181	0.00527007		ESP	0.0216649	0.0177988	0.0141573
IRL	Developing country	0.0112425	0.00729872	0.00600956	0.00459668	0.00386629	0.00325812	0.00278053	0.00282615	0.00285663	0.00300956	0.00289994	0.00277287	0.00256731		IRL	0.0112425	0.00760612	0.00663273	0.00581955	0.00524356	0.0048557	0.00468349	0.00472926	0.00469238	0.00456207	0.00436455	0.00415181	0.00376371		IRL	0.00945654	0.007628	0.00679767	0.00610565	0.00557683	0.00522399	0.00487689	0.00507369	0.00505249	0.00497453	0.00475513	0.00450968	0.00408073		IRL	0.00945654	0.00713461	0.0056878
PRT	Developing country	0.0311913	0.0202013	0.0161472	0.0117147	0.0092958	0.00735391	0.00587091	0.00557741	0.00528328	0.00494678	0.00425667	0.00369239	0.00316815		PRT	0.0311913	0.0210521	0.0178216	0.0148312	0.0126072	0.0109598	0.00988888	0.00933319	0.00867847	0.00749862	0.00640649	0.0055286	0.00464454		PRT	0.0247915	0.0211127	0.0182647	0.0155603	0.0134085	0.0117911	0.0102972	0.0100129	0.00934449	0.00817658	0.0069798	0.00600514	0.00503575		PRT	0.0247915	0.0197471	0.0152826
GBR	Developed income	0.0173376	0.0153319	0.0123952	0.00893413	0.00700051	0.00548468	0.00438788	0.00422014	0.00405149	0.00386929	0.00341515	0.00304047	0.00265736		GBR	0.0173376	0.0159776	0.0136806	0.0113109	0.00949426	0.00817402	0.00739089	0.00706195	0.00665509	0.0058653	0.00513997	0.00455249	0.00389573		GBR	0.0179372	0.0160236	0.0140208	0.011867	0.0100977	0.008794	0.00769608	0.00757628	0.00716582	0.00639559	0.00559994	0.0049449	0.00422387		GBR	0.0179372	0.0149871	0.0117316
FRA	Developed income	0.01947	0.0160464	0.013021	0.00940574	0.00740141	0.00582601	0.00467252	0.00449693	0.00432855	0.00420038	0.00375742	0.00336854	0.00295821		FRA	0.01947	0.0167223	0.0143713	0.011908	0.010038	0.00868272	0.00787034	0.00752513	0.00711019	0.00636719	0.00565509	0.0050437	0.00433676		FRA	0.0187733	0.0167704	0.0147286	0.0124934	0.010676	0.00934128	0.00819533	0.00807319	0.00765585	0.00694286	0.00616116	0.00547845	0.00470205		FRA	0.0187733	0.0156856	0.0123239
BEL	Developed income	0.0188492	0.0146074	0.0117537	0.00835368	0.00648039	0.00505216	0.00401971	0.00384044	0.00367533	0.00353148	0.00314061	0.00281287	0.00247271		BEL	0.0188492	0.0152226	0.0129725	0.010576	0.00878887	0.00752943	0.00677076	0.00642657	0.0060372	0.00535323	0.00472677	0.00421171	0.00362502		BEL	0.0169449	0.0152664	0.0132951	0.011096	0.00934746	0.00810051	0.00705034	0.00689462	0.00650052	0.00583723	0.00514977	0.00457474	0.00393036		BEL	0.0169449	0.014279	0.0111244
NLD	Developing country	0.0140145	0.012273	0.0099982	0.00730397	0.00578355	0.00455459	0.00364492	0.00350702	0.00338443	0.00330684	0.00296117	0.00266131	0.00235441		NLD	0.0140145	0.0127899	0.011035	0.00924706	0.00784379	0.00678788	0.00613945	0.00586862	0.00555935	0.0050127	0.0044567	0.00398478	0.0034516		NLD	0.0144497	0.0128267	0.0113094	0.00970166	0.00834232	0.00730272	0.00639296	0.00629604	0.005986	0.00546591	0.00485553	0.00432825	0.00374233		NLD	0.0144497	0.011997	0.00946288
NOR	Developing country	0.0136847	0.00765827	0.00676569	0.00551513	0.00486385	0.00434976	0.00360326	0.00355106	0.00364914	0.00346405	0.00297894	0.00252166	0.00203817		NOR	0.0136847	0.00809488	0.00770433	0.00721815	0.00680593	0.00642229	0.00576322	0.00550895	0.00575612	0.00516248	0.004437	0.00393953	0.00313636		NOR	0.00861901	0.00814348	0.00792411	0.00743709	0.0072228	0.00680816	0.00602687	0.00633796	0.00602875	0.005771	0.00508249	0.004199	0.00336396		NOR	0.00861901	0.00739873	0.00633332
LUX	Developing country	0.0108867	0.00720978	0.00603493	0.00454867	0.00374731	0.00309675	0.00259943	0.00260844	0.00261647	0.00273864	0.00256949	0.00239403	0.00217756		LUX	0.0108867	0.00751343	0.00666073	0.00575876	0.0050822	0.0046152	0.00437844	0.00436495	0.00429788	0.0041514	0.0038672	0.00358458	0.00319232		LUX	0.00829873	0.00753505	0.00682637	0.00604187	0.00540521	0.00496525	0.00455924	0.00468285	0.00462772	0.00452673	0.00421328	0.00389356	0.00346121		LUX	0.00829873	0.00704766	0.00571181
DEU	Developed income	0.0174937	0.0136663	0.0112353	0.00822751	0.00648409	0.00510947	0.00410142	0.00394854	0.00379062	0.00364645	0.00322474	0.00287652	0.0025236		DEU	0.0174937	0.0142419	0.0124003	0.0104163	0.00879388	0.00761483	0.00690839	0.00660746	0.00622658	0.0055275	0.00485338	0.00430701	0.00369962		DEU	0.0160519	0.0142829	0.0127087	0.0109284	0.0093528	0.00819239	0.00719365	0.00708868	0.00670443	0.00602725	0.00528771	0.00467825	0.00401124		DEU	0.0160519	0.013359	0.0106337
CHE	Developed income	0.0130776	0.00834121	0.00723425	0.00579249	0.00495776	0.00428121	0.00345208	0.00333694	0.0033747	0.00313952	0.00267585	0.00225239	0.00181174		CHE	0.0130776	0.00881677	0.0082379	0.00758117	0.00693733	0.00632108	0.00552142	0.00517678	0.00532322	0.00467884	0.00398556	0.00351884	0.00278793		CHE	0.00907735	0.0088697	0.0084729	0.00781112	0.00736225	0.00670087	0.00577401	0.00595579	0.00557535	0.00523034	0.00456538	0.00375061	0.00299025		CHE	0.00907735	0.00805853	0.00677194
ITA	Developing country	0.0208509	0.018521	0.0150911	0.0109696	0.00868351	0.00684305	0.00544795	0.00517345	0.00490215	0.00460696	0.00400624	0.00350282	0.0030147		ITA	0.0208509	0.0193011	0.0166559	0.0138879	0.0117768	0.0101985	0.00917646	0.0086572	0.00805241	0.00698351	0.00602958	0.00524476	0.00441958		ITA	0.0216824	0.0193566	0.0170701	0.0145706	0.0125253	0.010972	0.00955538	0.00928771	0.00867038	0.0076149	0.00656917	0.00569684	0.00479185		ITA	0.0216824	0.0181046	0.0142831
DNK	Developed income	0.0208096	0.0136612	0.0112553	0.00834759	0.00668698	0.00530478	0.00425305	0.00409443	0.00395056	0.00382471	0.00337175	0.00298254	0.00260193		DNK	0.0208096	0.0142366	0.0124225	0.0105683	0.00906905	0.00790591	0.00716378	0.00685158	0.0064893	0.00579773	0.00507465	0.00446575	0.00381446		DNK	0.0161496	0.0142776	0.0127314	0.0110879	0.00964546	0.00850555	0.00745959	0.00735058	0.00698731	0.00632191	0.00552878	0.00485068	0.00413576		DNK	0.0161496	0.0133541	0.0106527
AUT	Developed income	0.0190139	0.0135896	0.0110247	0.00795702	0.00622611	0.00487195	0.00389133	0.00373086	0.00357961	0.00342481	0.00301591	0.0026838	0.00234623		AUT	0.0190139	0.014162	0.0121679	0.0100738	0.008444	0.00726085	0.00655451	0.0062432	0.00587996	0.00519153	0.00453909	0.00401844	0.0034396		AUT	0.0159246	0.0142027	0.0124705	0.0105691	0.00898068	0.00781157	0.00682517	0.0066979	0.00633121	0.00566091	0.00494529	0.00436482	0.00372932		AUT	0.0159246	0.0132841	0.0104344
SWE	Developing country	0.0139538	0.0136062	0.0110241	0.0079705	0.00627459	0.00494735	0.00398503	0.00387534	0.00376767	0.00364613	0.00325406	0.00293212	0.00257731		SWE	0.0139538	0.0141793	0.0121672	0.0100909	0.00850976	0.00737322	0.00671234	0.00648496	0.00618888	0.00552702	0.00489752	0.00439025	0.00377836		SWE	0.0157375	0.0142201	0.0124698	0.010587	0.00905061	0.00793246	0.00698951	0.00695726	0.00666383	0.00602673	0.0053358	0.00476867	0.00409662		SWE	0.0157375	0.0133003	0.0104338
CZE	Developed income	0.020265	0.0169209	0.0127742	0.00864548	0.00648409	0.00497029	0.00388918	0.00366932	0.00346445	0.00318047	0.002735	0.00240429	0.00208593		CZE	0.020265	0.0176335	0.0140988	0.0109455	0.00879389	0.00740741	0.00655089	0.0061402	0.00569079	0.00482114	0.00411631	0.00359993	0.00305799		CZE	0.0211985	0.0176843	0.0144494	0.0114836	0.0093528	0.00796924	0.00682139	0.0065874	0.00612753	0.00525703	0.00448468	0.00391023	0.00331557		CZE	0.0211985	0.0165404	0.0120902
HRV	Developing country	0.0286068	0.025582	0.0201704	0.0144924	0.0114218	0.00906755	0.00734447	0.00712654	0.00691415	0.00676725	0.00609327	0.00552448	0.00492297		HRV	0.0286068	0.0266595	0.022262	0.0183479	0.0154906	0.0135137	0.0123709	0.0119255	0.0113574	0.0102582	0.00917066	0.00827178	0.00721712		HRV	0.0334576	0.0267362	0.0228156	0.0192499	0.0164751	0.0145387	0.0128818	0.012794	0.012229	0.0111857	0.00999134	0.00898478	0.00782503		HRV	0.0334576	0.0250068	0.0190905
SVN	Developing country	0.018813	0.016615	0.0130799	0.00935003	0.00730997	0.00574682	0.00460379	0.00442427	0.00424675	0.00408031	0.00363116	0.00325622	0.00286527		SVN	0.018813	0.0173148	0.0144362	0.0118374	0.00991397	0.0085647	0.00775456	0.00740353	0.00697583	0.00618518	0.00546506	0.00487552	0.00420051		SVN	0.0209573	0.0173646	0.0147952	0.0124194	0.0105441	0.00921431	0.00807476	0.00794273	0.00751119	0.00674439	0.00595413	0.00529577	0.00455433		SVN	0.0209573	0.0162414	0.0123796
SJM	Developing country	0.00882396	0.0058864	0.00536268	0.00450242	0.00408189	0.00375786	0.00323525	0.00334073	0.00361156	0.00385259	0.00374123	0.00356686	0.00324894		SJM	0.00882396	0.006222	0.00610667	0.00589273	0.00571174	0.00554837	0.00517462	0.00518265	0.00569685	0.00574153	0.0055724	0.0055724	0.0049995		SJM	0.00613715	0.00625936	0.00628087	0.00607147	0.00606159	0.00588173	0.00541134	0.00596256	0.00596667	0.0064183	0.00638307	0.00593942	0.0053623		SJM	0.00613715	0.00568692	0.00501997
POL	Developing country	0.0233501	0.0194926	0.015042	0.0105843	0.00820805	0.00645144	0.0052023	0.00503929	0.00486912	0.00466007	0.00410793	0.00368005	0.00323541		POL	0.0233501	0.0203136	0.0166018	0.0134	0.011132	0.00961482	0.00876268	0.00843271	0.00799815	0.00706401	0.00618262	0.00551013	0.00474314		POL	0.0251686	0.020372	0.0170147	0.0140588	0.0118395	0.0103441	0.00912452	0.00904687	0.00861196	0.00770268	0.0067359	0.00598508	0.00514266		POL	0.0251686	0.0190543	0.0142367
BIH	Developing country	0.0499274	0.0353116	0.0268038	0.018994	0.014803	0.0119857	0.00927474	0.00871522	0.00859444	0.00784038	0.00664283	0.00564209	0.00462704		BIH	0.0499274	0.0373248	0.0305225	0.0248592	0.0207137	0.0176966	0.0148345	0.0135204	0.0135568	0.0116845	0.00989421	0.00881447	0.00712016		BIH	0.0423385	0.0375489	0.0313932	0.0256132	0.0219825	0.0187599	0.0155131	0.015555	0.0141989	0.0130618	0.0113336	0.00939504	0.00763684		BIH	0.0423385	0.0341149	0.0250909
HUN	Developing country	0.0270912	0.0208366	0.0162199	0.0114532	0.00888706	0.006908	0.00544617	0.00515235	0.00487165	0.00452529	0.00387035	0.00334843	0.00287278		HUN	0.0270912	0.0217142	0.0179019	0.0145002	0.0120529	0.0102953	0.00917346	0.0086219	0.00800231	0.00685971	0.00582506	0.00501359	0.00421153		HUN	0.0269457	0.0217766	0.0183471	0.015213	0.0128189	0.0110761	0.00955226	0.00924984	0.00861643	0.00747991	0.00634634	0.00544574	0.00456627		HUN	0.0269457	0.0203681	0.0153515
SVK	Developing country	0.0204211	0.0184509	0.0141675	0.00977876	0.00743595	0.00573019	0.00452774	0.0043093	0.00409837	0.003829	0.00331733	0.00293444	0.00255934		SVK	0.0204211	0.019228	0.0156366	0.0123802	0.0100848	0.00853991	0.00762647	0.00721115	0.0067321	0.00580423	0.00499273	0.00439373	0.00375202		SVK	0.0234763	0.0192833	0.0160254	0.0129888	0.0107258	0.00918764	0.00794139	0.00773634	0.00724874	0.006329	0.00543953	0.00477245	0.00406805		SVK	0.0234763	0.018036	0.0134089
MNE	Developing country	0.0472654	0.0310063	0.0250173	0.0188101	0.015432	0.0130047	0.0103354	0.00985601	0.0098222	0.00896879	0.00755615	0.00630725	0.0050505		MNE	0.0472654	0.0327741	0.028488	0.0246185	0.0215938	0.0192011	0.0165309	0.0152902	0.0154934	0.0133662	0.0112546	0.00985363	0.00777178		MNE	0.0363548	0.0329708	0.0293007	0.0253652	0.0229164	0.0203548	0.0172872	0.0175911	0.0162273	0.0149418	0.0128919	0.0105026	0.00833575		MNE	0.0363548	0.0299555	0.0234185
SRB	Developing country	0.0373145	0.0259231	0.0213129	0.0170827	0.0148732	0.0131508	0.010855	0.010694	0.0109704	0.0104644	0.00904247	0.00766003	0.00620288		SRB	0.0373145	0.0274011	0.0242698	0.0223577	0.0208119	0.0194168	0.017362	0.0165902	0.0173047	0.0155951	0.0134684	0.011967	0.00954507		SRB	0.0335808	0.0275656	0.0249621	0.0230358	0.0220866	0.0205834	0.0181562	0.0190867	0.0181243	0.0174333	0.0154277	0.0127553	0.0102377		SRB	0.0335808	0.0250446	0.0199509
ALB	Developing country	0.0538763	0.0344063	0.0278711	0.0213811	0.0176971	0.014871	0.0117457	0.0111507	0.0110815	0.0100074	0.00822561	0.00670121	0.00525545		ALB	0.0538763	0.0363679	0.0317379	0.0279834	0.0247634	0.0219566	0.0187867	0.0172987	0.0174799	0.014914	0.0122517	0.0104691	0.00808716		ALB	0.0429685	0.0365863	0.0326432	0.0288322	0.0262802	0.0232759	0.0196461	0.0199019	0.0183078	0.016672	0.0140341	0.0111587	0.00867402		ALB	0.0429685	0.0332403	0.02609
GRC	Developed income	0.0255767	0.0232665	0.0180289	0.0124198	0.00939442	0.00715562	0.00554021	0.00513078	0.00475397	0.00429952	0.00364633	0.00314351	0.00268689		GRC	0.0255767	0.0242464	0.0198984	0.0157239	0.012741	0.0106643	0.00933186	0.00858581	0.007809	0.00651747	0.0054879	0.00470676	0.00393901		GRC	0.0287152	0.0243162	0.0203932	0.0164969	0.0135507	0.0114731	0.0097172	0.00921112	0.0084083	0.00710672	0.00597901	0.00511246	0.0042708		GRC	0.0287152	0.0227433	0.0170636
MKD	Developing country	0.0358064	0.0310005	0.0236213	0.0166792	0.0129697	0.0104828	0.00807232	0.00752461	0.00738382	0.00657308	0.00547422	0.00457648	0.00369376		MKD	0.0358064	0.0327679	0.0268984	0.0218296	0.0181483	0.0154775	0.0129113	0.0116733	0.0116472	0.00979589	0.00815361	0.0071497	0.00568401		MKD	0.0376629	0.0329646	0.0276657	0.0224917	0.0192599	0.0164075	0.0135019	0.01343	0.0121988	0.0109506	0.0093398	0.00762062	0.00609648		MKD	0.0376629	0.0299499	0.0221117
ROU	Developed income	0.0312715	0.0272737	0.0206762	0.0145456	0.0112725	0.00879353	0.00696758	0.00662981	0.00625705	0.00580822	0.00498134	0.0043241	0.00372315		ROU	0.0312715	0.0284224	0.0228202	0.0184152	0.0152881	0.0131053	0.0117361	0.0110943	0.010278	0.00880446	0.00749714	0.00647446	0.00545818		ROU	0.0357575	0.0285042	0.0233877	0.0193205	0.0162597	0.0140993	0.0122207	0.0119023	0.0110668	0.00960048	0.00816806	0.00703253	0.00591793		ROU	0.0357575	0.0266605	0.0195691
LTU	Developing country	0.0262414	0.018794	0.0148228	0.0105836	0.00826906	0.00651519	0.00528868	0.00518944	0.00507537	0.00493381	0.0044516	0.00410743	0.0037085		LTU	0.0262414	0.0195855	0.0163599	0.0133992	0.0112147	0.00970983	0.00890819	0.00868396	0.00833694	0.00747897	0.00669986	0.00615004	0.0054367		LTU	0.0239379	0.0196419	0.0167667	0.014058	0.0119275	0.0104463	0.00927604	0.00931642	0.00897675	0.00815515	0.00729943	0.00668015	0.00589464		LTU	0.0239379	0.0183714	0.0140292
LVA	Developing country	0.0309911	0.0222568	0.0169214	0.0118745	0.00921682	0.00721205	0.00578773	0.00559671	0.00537274	0.00512526	0.00452352	0.00403009	0.00354913		LVA	0.0309911	0.0231942	0.0186761	0.0150335	0.0125001	0.0107484	0.00974878	0.00936548	0.00882541	0.00776918	0.00680811	0.00603424	0.00520307		LVA	0.0288883	0.0232609	0.0191405	0.0157725	0.0132946	0.0115636	0.0101513	0.0100476	0.0095027	0.0084716	0.00741736	0.00655436	0.00564133		LVA	0.0288883	0.0217564	0.0160154
FIN	Developed income	0.0177241	0.0151198	0.0122678	0.00883725	0.00690919	0.00542368	0.00433632	0.00416363	0.00400709	0.00384851	0.00339318	0.00301439	0.00262742		FIN	0.0177241	0.0157566	0.0135399	0.0111882	0.00937041	0.00808311	0.00730404	0.00696738	0.00658216	0.0058338	0.0051069	0.00451344	0.00385182		FIN	0.0177227	0.015802	0.0138767	0.0117383	0.00996597	0.00869619	0.00760565	0.00747482	0.00708729	0.00636124	0.00556392	0.00490248	0.00417626		FIN	0.0177227	0.0147799	0.011611
EST	Developed income	0.0275746	0.0198184	0.0148504	0.010047	0.00750995	0.00569635	0.0044573	0.00423232	0.00399845	0.00371236	0.00323828	0.00286302	0.00247894		EST	0.0275746	0.0206531	0.0163903	0.0127199	0.0101852	0.00848948	0.00750783	0.00708233	0.00656797	0.00562741	0.00487376	0.00428679	0.00363416		EST	0.0259922	0.0207125	0.0167979	0.0133452	0.0108325	0.00913338	0.00781785	0.00759815	0.00707202	0.00613619	0.00530991	0.00465629	0.00394027		EST	0.0259922	0.0193728	0.0140553
BGR	Developing country	0.0288356	0.0281056	0.0203778	0.0135491	0.0100709	0.00763886	0.00595773	0.00559613	0.00525857	0.00490173	0.00430658	0.00384546	0.00340555		BGR	0.0288356	0.0292894	0.0224909	0.0171535	0.0136584	0.0113845	0.0100351	0.00936452	0.00863787	0.00743034	0.0064816	0.0057578	0.00499258		BGR	0.0370226	0.0293736	0.0230502	0.0179968	0.0145265	0.012248	0.0104495	0.0100465	0.00930077	0.00810213	0.00706163	0.00625409	0.00541311		BGR	0.0370226	0.0274737	0.0192867
BLR	Developing country	0.0418845	0.0313796	0.0235474	0.0162941	0.0116026	0.00949137	0.00718098	0.00656288	0.00594082	0.00505995	0.00434034	0.00376796	0.00326144		BLR	0.0418845	0.0328117	0.0271301	0.0214204	0.0165457	0.0140619	0.0122601	0.0111449	0.0100416	0.00826821	0.00686211	0.00607191	0.00465065		BLR	0.0345605	0.0330451	0.0272138	0.0211928	0.0173556	0.0143237	0.0127375	0.0119234	0.0108171	0.00888143	0.00696148	0.00600925	0.00508264		BLR	0.0345605	0.0308885	0.0226565
TUR	Developing country	0.0199074	0.0189962	0.0155236	0.0118398	0.00977269	0.00822225	0.00649122	0.00614907	0.00610671	0.00552611	0.00459613	0.00378506	0.00300735		TUR	0.0199074	0.0200792	0.0176773	0.0154958	0.0136748	0.0121399	0.0103824	0.0095394	0.00963267	0.00823559	0.00684574	0.00591329	0.00462775		TUR	0.0225024	0.0201998	0.0181815	0.0159658	0.0145124	0.0128693	0.0108573	0.0109749	0.0100889	0.00920634	0.00784165	0.00630277	0.00496357		TUR	0.0225024	0.0183524	0.0145315
MDA	Developing country	0.0523287	0.0446244	0.0332875	0.0244045	0.0179353	0.0147825	0.0111435	0.0101825	0.00924005	0.00773879	0.00640429	0.00534699	0.00448708		MDA	0.0523287	0.046661	0.0383522	0.0320824	0.0255764	0.021901	0.0190253	0.0172917	0.0156181	0.0126456	0.0101252	0.00861646	0.00639834		MDA	0.0608417	0.0469929	0.0384705	0.0317416	0.0268283	0.0223087	0.0197662	0.0184996	0.0168244	0.0135834	0.0102719	0.00852754	0.00699267		MDA	0.0608417	0.0439261	0.0320281
CYP	Developed income	0.0214897	0.0249562	0.0205422	0.0152162	0.0122574	0.00986738	0.00807241	0.00787181	0.0076222	0.00728017	0.00632742	0.00554563	0.00477744		CYP	0.0214897	0.0260072	0.0226724	0.0192642	0.0166239	0.0147057	0.0135971	0.0131726	0.0125204	0.0110357	0.00952306	0.00830345	0.00700378		CYP	0.0289791	0.0260821	0.0232362	0.0202113	0.0176804	0.0158211	0.0141585	0.014132	0.0134813	0.0120335	0.0103753	0.00901917	0.00759371		CYP	0.0289791	0.024395	0.0194424
IRN	Developing country	0.0257941	0.0250057	0.021993	0.0197629	0.0171502	0.0154686	0.0137824	0.0127759	0.0117817	0.00987584	0.00832806	0.0070648	0.00585567		IRN	0.0257941	0.0275065	0.0269689	0.0288681	0.0275058	0.025662	0.0233414	0.0200108	0.0184218	0.0144573	0.0120242	0.0102499	0.00856853		IRN	0.0277806	0.0266327	0.0265846	0.0274041	0.0258923	0.0243932	0.0239847	0.0211838	0.0193434	0.0151356	0.0126238	0.0107382	0.0090162		IRN	0.0277806	0.0238073	0.020342
UKR	Developing country	0.0667425	0.0580794	0.0414919	0.0279134	0.0192611	0.0152143	0.0110855	0.00977028	0.0085891	0.0069499	0.00566717	0.00471798	0.00395225		UKR	0.0667425	0.06073	0.0478048	0.0366951	0.0274671	0.0225407	0.0189264	0.0165917	0.0145179	0.0113565	0.00895984	0.00760283	0.0056357		UKR	0.070474	0.061162	0.0479523	0.0363053	0.0288116	0.0229604	0.0196634	0.0177506	0.0156391	0.0121987	0.00908959	0.00752437	0.00615919		UKR	0.070474	0.0571705	0.0399221
GEO	Developing country	0.0374281	0.0399161	0.0302526	0.0221391	0.0161837	0.0132474	0.00988206	0.00891741	0.00802893	0.0066919	0.0055766	0.00471876	0.00398615		GEO	0.0374281	0.0417378	0.0348555	0.0291042	0.0230786	0.0196267	0.0168717	0.0151434	0.013571	0.0109349	0.00881665	0.00760409	0.00568405		GEO	0.0514227	0.0420346	0.034963	0.0287951	0.0242082	0.0199921	0.0175287	0.0162011	0.0146192	0.0117459	0.00894433	0.00752562	0.00621203		GEO	0.0514227	0.0392914	0.029108
ARM	Developing country	0.0500201	0.0454568	0.0355804	0.0267437	0.0201766	0.0170866	0.0131994	0.0123012	0.0113734	0.0099407	0.00851228	0.0072552	0.00617508		ARM	0.0500201	0.0475313	0.040994	0.0351574	0.0287726	0.0253146	0.0225354	0.0208896	0.0192241	0.0162436	0.013458	0.0116915	0.00880534		ARM	0.0554763	0.0478694	0.0411204	0.034784	0.030181	0.0257859	0.023413	0.0223487	0.0207089	0.0174483	0.0136529	0.0115708	0.00962325		ARM	0.0554763	0.0447454	0.0342343
AZE	Developing country	0.0279035	0.0389675	0.0331763	0.0274267	0.0224256	0.0200663	0.0160361	0.0151766	0.014028	0.0118301	0.00976275	0.00797804	0.00644723		AZE	0.0279035	0.0407459	0.0382241	0.0360553	0.0319798	0.0297292	0.0273786	0.0257726	0.0237111	0.0193309	0.015435	0.0128563	0.00919342		AZE	0.0405634	0.0410357	0.038342	0.0356723	0.0335451	0.0302827	0.0284448	0.0275728	0.0255424	0.0207646	0.0156585	0.0127236	0.0100474		AZE	0.0405634	0.0383577	0.0319211
KAZ	Developing country	0.0259458	0.0217169	0.0166603	0.0122684	0.00933643	0.0081982	0.00672152	0.00668271	0.00654212	0.00625094	0.0057596	0.00520561	0.00463628		KAZ	0.0259458	0.022708	0.0191951	0.0161281	0.0133141	0.012146	0.0114757	0.0113485	0.0110579	0.0102143	0.00910597	0.00838862	0.00661109		KAZ	0.0248162	0.0228695	0.0192543	0.0159568	0.0139658	0.0123721	0.0119226	0.0121411	0.011912	0.0109719	0.00923784	0.00830206	0.00722519		KAZ	0.0248162	0.021377	0.0160299
TKM	Developing country	0.0377615	0.0312967	0.0217851	0.0141035	0.00983959	0.00797337	0.00603918	0.00560597	0.0052447	0.0048643	0.00451253	0.00425121	0.00397822		TKM	0.0377615	0.032725	0.0250996	0.0185405	0.0140316	0.0118129	0.0103107	0.00951994	0.00886495	0.0079485	0.00713435	0.00685065	0.00567273		TKM	0.0337328	0.0329578	0.0251771	0.0183436	0.0147184	0.0120328	0.0107122	0.0101849	0.00954962	0.008538	0.00723766	0.00677996	0.00619967		TKM	0.0337328	0.0308069	0.0209608
UZB	Developing country	0.0596119	0.0622655	0.0468775	0.0335693	0.0242255	0.0197157	0.0146927	0.0132388	0.0119027	0.00993656	0.00821186	0.00689938	0.00582042		UZB	0.0596119	0.0651072	0.0540099	0.0441304	0.0345464	0.0292097	0.0250849	0.0224818	0.0201188	0.0162368	0.012983	0.0111181	0.00829961		UZB	0.0759529	0.0655703	0.0541765	0.0436616	0.0362374	0.0297535	0.0260618	0.0240522	0.0216726	0.0174411	0.013171	0.0110033	0.00907055		UZB	0.0759529	0.0612911	0.0451039
AFG	Developing country	0.119316	0.238659	0.213571	0.173347	0.145164	0.117695	0.0897062	0.0704808	0.0564606	0.0367172	0.0238629	0.0158264	0.0108348		AFG	0.119316	0.249022	0.234311	0.211375	0.182012	0.155248	0.124772	0.0972995	0.0787055	0.0504877	0.0331244	0.0224402	0.0153202		AFG	0.223117	0.251567	0.239089	0.218969	0.18857	0.157763	0.130488	0.10359	0.0824996	0.0535737	0.0352414	0.0237711	0.0162555		AFG	0.223117	0.228753	0.198563
TJK	Developing country	0.0683499	0.14465	0.102636	0.0665156	0.0435349	0.0323513	0.022238	0.0187394	0.0159586	0.012298	0.00948263	0.00748617	0.00596959		TJK	0.0683499	0.151252	0.118252	0.0874419	0.0620824	0.0479299	0.037967	0.0318228	0.0269744	0.0200956	0.0149921	0.0120636	0.00851232		TJK	0.166895	0.152328	0.118617	0.086513	0.0651212	0.0488222	0.0394455	0.0340456	0.0290577	0.021586	0.0152092	0.0119392	0.00930302		TJK	0.166895	0.142387	0.0987526
KGZ	Developing country	0.116841	0.150606	0.108429	0.0700818	0.0460614	0.0344377	0.0238149	0.0201029	0.0170518	0.0129997	0.0100551	0.00795456	0.0063882		KGZ	0.116841	0.15748	0.124926	0.0921301	0.0656852	0.051021	0.0406593	0.0341383	0.0288221	0.0212422	0.0158972	0.0128184	0.00910923		KGZ	0.162499	0.1586	0.125311	0.0911514	0.0689004	0.0519709	0.0422427	0.0365228	0.0310481	0.0228176	0.0161274	0.0126862	0.00995538		KGZ	0.162499	0.148249	0.104326
MEX	Developing country	0.0272268	0.0262943	0.0222362	0.0173795	0.0149761	0.0165752	0.010199	0.00926516	0.00849668	0.00695062	0.00571375	0.00466141	0.00382689		MEX	0.0272268	0.0283642	0.0253624	0.021991	0.0217676	0.0205211	0.0173682	0.0138582	0.0124251	0.00908431	0.00731142	0.00599795	0.0048751		MEX	0.0293232	0.0275814	0.0260799	0.0231377	0.0201975	0.0177237	0.0165383	0.0138321	0.0123307	0.00998535	0.00805675	0.00652055	0.00528474		MEX	0.0293232	0.0256523	0.0211267
USA	Developed income	0.0122168	0.0100959	0.00825363	0.00615771	0.00508002	0.00442292	0.00385804	0.00384552	0.00382372	0.00371425	0.00353195	0.0033417	0.00315055		USA	0.0122168	0.0104737	0.00914898	0.00781058	0.00667501	0.00600846	0.00569016	0.00575731	0.00568846	0.00545835	0.00512805	0.00487796	0.00459085		USA	0.012217	0.0105805	0.00937494	0.00822519	0.00733322	0.00669353	0.00608007	0.00628261	0.00614568	0.00596025	0.00567702	0.00533924	0.00501935		USA	0.012217	0.00979002	0.00778988
GTM	Developing country	0.0315867	0.0493829	0.0420089	0.0335174	0.0290481	0.0319314	0.0193599	0.0172267	0.0153948	0.0118754	0.0091342	0.00695989	0.00536334		GTM	0.0315867	0.0532704	0.0479148	0.0424109	0.042221	0.0395329	0.0329688	0.0257666	0.0225126	0.0155209	0.0116883	0.00895547	0.00683239		GTM	0.0563658	0.0518002	0.0492704	0.0446224	0.0391757	0.0341438	0.0313934	0.0257179	0.0223414	0.0170603	0.0128798	0.00973576	0.00740649		GTM	0.0563658	0.0481773	0.0399127
ECU	Developing country	0.0411228	0.0425423	0.0353484	0.0271137	0.0227347	0.0244475	0.0146617	0.0129886	0.0116166	0.00910142	0.0072158	0.00572236	0.00459982		ECU	0.0411228	0.0458913	0.040318	0.034308	0.0330445	0.0302674	0.0249681	0.0194275	0.0169876	0.0118954	0.00923348	0.0073631	0.00585973		ECU	0.0459915	0.0446248	0.0414586	0.0360969	0.030661	0.0261414	0.023775	0.0193909	0.0168584	0.0130752	0.0101748	0.00800465	0.00635211		ECU	0.0459915	0.0415037	0.0335846
SLV	Developing country	0.0411612	0.0523132	0.043894	0.0339387	0.0286146	0.0308745	0.0185584	0.0165072	0.014856	0.0116445	0.00914272	0.00717724	0.00570054		SLV	0.0411612	0.0564313	0.050065	0.0429439	0.0415909	0.0382244	0.0316038	0.0246904	0.0217246	0.0152191	0.0116992	0.00923514	0.00726195		SLV	0.0607785	0.0548739	0.0514814	0.0451832	0.038591	0.0330137	0.0300936	0.0246438	0.0215594	0.0167286	0.0128918	0.0100398	0.00787215		SLV	0.0607785	0.0510361	0.0417038
HND	Developing country	0.0649036	0.0929778	0.0733315	0.0530373	0.0420939	0.0429784	0.0245462	0.0208194	0.0179027	0.0129682	0.00951935	0.00702537	0.00529402		HND	0.0649036	0.100297	0.083641	0.0671101	0.0611829	0.0532096	0.0418007	0.0311404	0.02618	0.0169492	0.0121811	0.00903972	0.00674408		HND	0.103721	0.097529	0.0860073	0.0706095	0.0567699	0.0459562	0.0398032	0.0310816	0.0259809	0.0186303	0.0134229	0.00982735	0.00731076		HND	0.103721	0.0907079	0.0696723
BLZ	Developing country	0.0653977	0.0591067	0.0495678	0.0374316	0.0309911	0.0330132	0.0196556	0.0173285	0.0154315	0.0118857	0.00923528	0.0071802	0.00566548		BLZ	0.0653977	0.0637597	0.0565365	0.0473636	0.045045	0.0408722	0.0334723	0.0259189	0.0225663	0.0155344	0.0118176	0.00923894	0.00721728		BLZ	0.0626828	0.062	0.058136	0.0498334	0.041796	0.0353006	0.0318728	0.02587	0.0223947	0.0170752	0.0130223	0.0100439	0.00782373		BLZ	0.0626828	0.0576638	0.0470945
NIC	Developing country	0.0538821	0.0817857	0.064992	0.047386	0.0378037	0.0387658	0.0221986	0.018826	0.0161849	0.0117742	0.00875484	0.00655688	0.00501481		NIC	0.0538821	0.088224	0.0741292	0.0599593	0.0549472	0.0479942	0.0378029	0.0281587	0.023668	0.0153886	0.0112029	0.00843691	0.00638838		NIC	0.0921757	0.0857891	0.0762264	0.0630859	0.0509839	0.0414517	0.0359965	0.0281056	0.023488	0.016915	0.0123449	0.00917201	0.00692518		NIC	0.0921757	0.0797891	0.061749
CRI	Developing country	0.0268755	0.0245942	0.0208189	0.016672	0.0146727	0.016613	0.010513	0.00983425	0.00924279	0.00783773	0.00659568	0.00550821	0.00463739		CRI	0.0268755	0.0265303	0.0237458	0.0210958	0.0213265	0.0205678	0.017903	0.0147094	0.0135162	0.0102437	0.00843995	0.00708755	0.00590759		CRI	0.0281725	0.0257981	0.0244176	0.0221958	0.0197883	0.017764	0.0170475	0.0146817	0.0134134	0.0112598	0.00930033	0.00770509	0.00640399		CRI	0.0281725	0.0239938	0.0197801
CUB	Developing country	0.0406227	0.0386137	0.0331304	0.027028	0.02389	0.0266161	0.016434	0.0149861	0.0137242	0.0110854	0.00889865	0.00710079	0.00568207		CUB	0.0406227	0.0416534	0.0377881	0.0341996	0.0347237	0.0329522	0.0279861	0.0224152	0.0200696	0.0144884	0.0113869	0.00913677	0.00723841		CUB	0.0457015	0.0405038	0.0388572	0.0359829	0.0322191	0.0284602	0.0266488	0.0223729	0.019917	0.0159254	0.0125477	0.00993285	0.00784664		CUB	0.0457015	0.037671	0.0314772
PAN	Developing country	0.0217788	0.0180277	0.0143686	0.0109969	0.00938182	0.0103719	0.00643883	0.00594296	0.0055556	0.0047704	0.00412769	0.00354815	0.00307443		PAN	0.0217788	0.0194468	0.0163886	0.0139148	0.0136363	0.012841	0.010965	0.0088891	0.00812425	0.00623482	0.00528186	0.00456549	0.00391653		PAN	0.0213678	0.0189101	0.0168523	0.0146404	0.0126528	0.0110905	0.010441	0.00887233	0.00806246	0.00685323	0.00582031	0.00496328	0.00424563		PAN	0.0213678	0.0175876	0.0136516
PER	Developing country	0.0295871	0.0312175	0.0243304	0.0177997	0.014577	0.0155701	0.00935826	0.00837133	0.00760771	0.00620189	0.00513578	0.00424471	0.00355311		PER	0.0295871	0.033675	0.0277509	0.0225227	0.0211875	0.0192766	0.0159366	0.0125213	0.0111252	0.00810573	0.00657183	0.00546178	0.00452632		PER	0.0368024	0.0327456	0.028536	0.0236971	0.0196593	0.0166489	0.015175	0.0124977	0.0110405	0.00890972	0.00724178	0.00593767	0.00490665		PER	0.0368024	0.0304554	0.0231163
COL	Developing country	0.0284822	0.0289689	0.0245572	0.0196248	0.0171417	0.0191833	0.01193	0.0109351	0.0100974	0.00830874	0.00683485	0.00558279	0.00460807		COL	0.0284822	0.0312494	0.0280097	0.024832	0.0249152	0.02375	0.0203161	0.016356	0.0147659	0.0108593	0.008746	0.00718351	0.00587024		COL	0.0339267	0.030387	0.0288021	0.0261269	0.0231181	0.0205125	0.0193453	0.0163251	0.0146536	0.0119365	0.00963758	0.00780941	0.0063635		COL	0.0339267	0.0282617	0.0233319
BHS	Developed income	0.0217005	0.0140123	0.0126381	0.0105412	0.00960552	0.0111811	0.00727396	0.00698467	0.00674974	0.0059847	0.0052614	0.00458305	0.00400551		BHS	0.0217005	0.0151153	0.0144148	0.0133382	0.0139615	0.0138429	0.0123871	0.0104472	0.00987051	0.00782187	0.00673258	0.00589712	0.00510263		BHS	0.0154303	0.0146982	0.0148227	0.0140337	0.0129545	0.0119558	0.0117952	0.0104275	0.00979545	0.0085977	0.00741891	0.00641094	0.00553139		BHS	0.0154303	0.0136702	0.0120075
JAM	Developing country	0.0516602	0.0498261	0.043287	0.0349455	0.0304117	0.0335022	0.020415	0.0183022	0.016592	0.0131677	0.0104002	0.00817283	0.00647381		JAM	0.0516602	0.0537485	0.0493727	0.0442179	0.0442029	0.0414776	0.0347655	0.0273753	0.0242633	0.0172099	0.0133083	0.0105162	0.00824701		JAM	0.0561155	0.0522651	0.0507695	0.0465236	0.0410146	0.0358234	0.0331042	0.0273236	0.0240788	0.0189169	0.014665	0.0114325	0.00893999		JAM	0.0561155	0.0486097	0.0411271
CHL	Developed income	0.0251272	0.0205689	0.0170796	0.0132646	0.0113512	0.0125204	0.00775048	0.00713866	0.00664307	0.00557476	0.00470305	0.0039398	0.00331236		CHL	0.0251272	0.0221881	0.0194808	0.0167842	0.0164989	0.0155009	0.0131986	0.0106775	0.00971452	0.0072861	0.00601811	0.00506944	0.00421962		CHL	0.0234765	0.0215758	0.020032	0.0176594	0.0153088	0.0133878	0.0125679	0.0106574	0.00964064	0.00800878	0.00663161	0.00551114	0.00457419		CHL	0.0234765	0.0200668	0.0162274
HTI	Developing country	0.0858941	0.158838	0.125494	0.0889343	0.0686293	0.0677548	0.0373149	0.0304455	0.0251648	0.016985	0.011789	0.00835477	0.00614492		HTI	0.0858941	0.171342	0.143138	0.112532	0.0997516	0.0838843	0.0635451	0.0455384	0.0367997	0.022199	0.0150854	0.0107503	0.00782804		HTI	0.162158	0.166613	0.147187	0.1184	0.0925566	0.0724493	0.0605086	0.0454525	0.0365199	0.0244009	0.0166232	0.011687	0.00848581		HTI	0.162158	0.15496	0.119232
BRA	Developing country	0.0369737	0.0276924	0.0235895	0.0189649	0.0167647	0.0190725	0.0121116	0.0113295	0.0106669	0.00916234	0.00778845	0.00654051	0.00548691		BRA	0.0369737	0.0298724	0.0269059	0.023997	0.0243673	0.0236128	0.0206254	0.0169459	0.0155987	0.011975	0.00996625	0.00841583	0.00698979		BRA	0.0312482	0.0290479	0.0276671	0.0252483	0.0226097	0.0203939	0.0196398	0.0169139	0.0154801	0.0131627	0.0109822	0.00914911	0.00757713		BRA	0.0312482	0.0270163	0.0224124
ARG	Developing country	0.0355415	0.0247493	0.0201348	0.0150028	0.0125638	0.0137634	0.00847155	0.00774284	0.00716729	0.00602456	0.00512383	0.00433897	0.00370343		ARG	0.0355415	0.0266976	0.0229655	0.0189836	0.0182613	0.0170398	0.0144265	0.0115812	0.0104811	0.00787397	0.00655654	0.00558307	0.00471781		ARG	0.0268152	0.0259608	0.0236152	0.0199734	0.0169441	0.014717	0.0137372	0.0115594	0.0104014	0.00865496	0.00722493	0.00606952	0.00511424		ARG	0.0268152	0.0241451	0.0191301
VEN	Developing country	0.0281795	0.0355424	0.0301289	0.0230044	0.0194127	0.021116	0.0128377	0.0115624	0.0105306	0.00858869	0.00706327	0.00576525	0.00474769		VEN	0.0281795	0.0383403	0.0343647	0.0291083	0.028216	0.0261428	0.0218619	0.0172942	0.0153995	0.0112252	0.00903829	0.0074183	0.0060481		VEN	0.0362499	0.0372822	0.0353369	0.0306262	0.0261808	0.0225791	0.0208172	0.0172616	0.0152824	0.0123386	0.00995967	0.00806465	0.00655631		VEN	0.0362499	0.0346747	0.0286255
DOM	Developing country	0.0276137	0.0217086	0.0184279	0.0152939	0.013898	0.0161384	0.010404	0.0098626	0.00939825	0.00820452	0.00709792	0.00604302	0.00516151		DOM	0.0276137	0.0234175	0.0210187	0.0193519	0.0202006	0.0199802	0.0177174	0.0147518	0.0137436	0.0107231	0.00908262	0.00777571	0.00657527		DOM	0.0275558	0.0227712	0.0216133	0.020361	0.0187436	0.0172566	0.0168708	0.014724	0.013639	0.0117867	0.0100085	0.00845321	0.00712777		DOM	0.0275558	0.0211786	0.0175084
BOL	Developing country	0.056076	0.0589603	0.0461361	0.0333487	0.0266383	0.0274712	0.0158872	0.0136452	0.0118898	0.00889918	0.00678649	0.00522974	0.00412385		BOL	0.056076	0.0636017	0.0526223	0.0421973	0.0387184	0.0340108	0.027055	0.0204096	0.017387	0.011631	0.00868412	0.00672924	0.00525339		BOL	0.0670322	0.0618464	0.054111	0.0443977	0.0359257	0.0293745	0.0257622	0.0203711	0.0172548	0.0127847	0.00956939	0.00731556	0.00569482		BOL	0.0670322	0.0575209	0.0438339
PRY	Developing country	0.0337929	0.0309713	0.0261543	0.0209896	0.0183555	0.0204261	0.0125903	0.0114153	0.010403	0.00834275	0.00669921	0.00535386	0.00431206		PRY	0.0337929	0.0334094	0.0298313	0.026559	0.0266794	0.0252886	0.0214405	0.0170743	0.0152129	0.0109038	0.00857243	0.00688894	0.00549315		PRY	0.036004	0.0324873	0.0306753	0.0279439	0.024755	0.0218413	0.0204159	0.0170421	0.0150972	0.0119853	0.00944632	0.00748917	0.00595472		PRY	0.036004	0.0302152	0.0248492
TTO	Developing country	0.0145777	0.0154124	0.0131013	0.0103465	0.0090691	0.0103644	0.0066749	0.00632434	0.00598995	0.00520335	0.00456502	0.00395203	0.00342831		TTO	0.0145777	0.0166256	0.0149432	0.0130918	0.0131818	0.0128317	0.011367	0.00945954	0.00875942	0.00680067	0.00584149	0.00508517	0.00436734		TTO	0.0168025	0.0161668	0.015366	0.0137745	0.012231	0.0110825	0.0108238	0.0094417	0.00869281	0.0074752	0.00643698	0.00552824	0.00473431		TTO	0.0168025	0.0150361	0.0124476
FLK	Developing country	0.00383795	0.00235516	0.00224273	0.00201278	0.0019788	0.00248854	0.001737	0.00178578	0.00184556	0.00189213	0.00191611	0.00190213	0.00187669		FLK	0.00383795	0.00254056	0.00255804	0.00254684	0.00287616	0.00308095	0.002958	0.00267106	0.00269885	0.00247297	0.00245189	0.00244751	0.00239072		FLK	0.00254891	0.00247044	0.00263041	0.00267965	0.00266871	0.00266096	0.00281665	0.00266602	0.00267833	0.00271826	0.00270184	0.00266077	0.00259161		FLK	0.00254891	0.00229766	0.00213082
GUY	Developing country	0.0563915	0.0232497	0.020489	0.0180291	0.0173554	0.0210209	0.0139175	0.0134177	0.0129665	0.0114654	0.00955377	0.00776617	0.00629206		GUY	0.0563915	0.0250799	0.0233695	0.0228129	0.0252258	0.0260251	0.0237007	0.0200694	0.0189616	0.0149851	0.0122252	0.00999293	0.00801548		GUY	0.0575643	0.0243877	0.0240307	0.0240024	0.0234063	0.0224774	0.0225682	0.0200315	0.0188174	0.0164714	0.0134714	0.0108636	0.008689		GUY	0.0575643	0.0226821	0.0194667
URY	Developed income	0.0263417	0.0195327	0.0163019	0.0128301	0.0111666	0.0125275	0.00782785	0.00724318	0.00678461	0.00579492	0.00496104	0.00420934	0.0035883		URY	0.0263417	0.0210704	0.0185937	0.0162344	0.0162305	0.0155097	0.0133304	0.0108339	0.00992149	0.00757383	0.00634824	0.00541626	0.00457114		URY	0.0223547	0.0204888	0.0191198	0.017081	0.0150598	0.0133954	0.0126934	0.0108134	0.00984604	0.00832506	0.00699538	0.00588818	0.00495525		URY	0.0223547	0.0190559	0.0154884
SUR	Developing country	0.0351991	0.0434462	0.0341287	0.0243407	0.0194585	0.0203147	0.0120156	0.0106102	0.0095283	0.00761634	0.00616314	0.00501043	0.00412508		SUR	0.0351991	0.0468663	0.0389268	0.0307993	0.0282826	0.0251507	0.0204619	0.01587	0.0139337	0.0099544	0.00788646	0.00644704	0.00525496		SUR	0.043595	0.0455729	0.0400281	0.0324053	0.0262426	0.0217222	0.0194841	0.0158401	0.0138278	0.0109417	0.00869042	0.00700877	0.00569652		SUR	0.043595	0.0423855	0.0324257
GUF	Developing country	0.0262208	0.0209736	0.0213193	0.0203373	0.0211344	0.0278857	0.0203081	0.0216786	0.0231694	0.0250827	0.0264091	0.0268705	0.0268265		GUF	0.0262208	0.0226246	0.0243166	0.0257336	0.0307185	0.0345241	0.0345835	0.0324255	0.0338819	0.0327825	0.0337935	0.034575	0.0341743		GUF	0.0209594	0.0220002	0.0250045	0.0270754	0.0285028	0.0298178	0.032931	0.0323643	0.0336242	0.0360341	0.0372385	0.0375875	0.0370459		GUF	0.0209594	0.0204615	0.0202555
SGS	Developing country	0.006086	0.00392526	0.00373752	0.003355	0.00329812	0.00414726	0.00289537	0.00297641	0.00307566	0.00315355	0.003194	0.00317009	0.00312819		SGS	0.006086	0.00423426	0.00426298	0.00424521	0.00479376	0.00513454	0.00493065	0.00445192	0.0044977	0.00412163	0.0040871	0.00407903	0.00398501		SGS	0.00416085	0.0041174	0.00438358	0.00446658	0.00444799	0.00443461	0.00469503	0.00444352	0.00446349	0.00453044	0.00450374	0.00443444	0.00431986		SGS	0.00416085	0.00382943	0.00355103
MAR	Developing country	0.0621017	0.0504916	0.0392297	0.031107	0.0241694	0.0196779	0.0159869	0.013703	0.01184	0.00904392	0.00710045	0.00573516	0.00459566		MAR	0.0621017	0.0555414	0.0481052	0.0454388	0.0387631	0.032645	0.0270747	0.0214627	0.0185129	0.0132395	0.0102518	0.00832077	0.00672476		MAR	0.0594838	0.0537769	0.0474198	0.0431344	0.0364893	0.031031	0.0278209	0.0227209	0.019439	0.0138606	0.010763	0.00871722	0.0070761		MAR	0.0594838	0.0480719	0.0362847
TUN	Developing country	0.0432813	0.0387227	0.0290005	0.0220382	0.0169132	0.0139098	0.0116304	0.0103345	0.00924917	0.00754646	0.00637069	0.00551162	0.00466936		TUN	0.0432813	0.0425955	0.0355617	0.0321917	0.0271255	0.023076	0.0196967	0.0161868	0.0144619	0.0110473	0.00919814	0.00799646	0.00683262		TUN	0.0432112	0.0412422	0.035055	0.0305591	0.0255344	0.0219351	0.0202395	0.0171357	0.0151854	0.0115656	0.00965681	0.00837746	0.00718959		TUN	0.0432112	0.036867	0.0268234
SAU	Developing country	0.0105122	0.00745908	0.00686223	0.00678255	0.00650038	0.00641735	0.00622333	0.00626551	0.00625304	0.00612429	0.00583594	0.00540865	0.00478541		SAU	0.0105122	0.00820508	0.00841478	0.00990743	0.0104254	0.0106462	0.0105396	0.00981358	0.00977721	0.0089654	0.00842606	0.00784706	0.00700243		SAU	0.00827014	0.00794441	0.00829487	0.00940499	0.00981383	0.0101198	0.0108301	0.0103888	0.0102663	0.00938603	0.00884623	0.00822094	0.00736828		SAU	0.00827014	0.00710161	0.00634707
ISR	Developing country	0.0218804	0.0109582	0.00977852	0.0090169	0.00801688	0.00734585	0.00661488	0.00620616	0.0058012	0.00507484	0.0044499	0.00389723	0.00330913		ISR	0.0218804	0.0120542	0.0119909	0.0131712	0.0128576	0.0121865	0.0112027	0.00972062	0.0090707	0.0074291	0.00642486	0.00565425	0.00484221		ISR	0.0127808	0.0116712	0.01182	0.0125032	0.0121033	0.011584	0.0115114	0.0102904	0.00952446	0.00777765	0.00674524	0.00592365	0.0050952		ISR	0.0127808	0.010433	0.00904444
JOR	Developing country	0.0534295	0.0453586	0.0364961	0.0301397	0.0242222	0.0202335	0.0167882	0.0146366	0.012809	0.0100217	0.00797382	0.00645606	0.00516537		JOR	0.0534295	0.049895	0.0447532	0.0440257	0.0388479	0.0335668	0.0284317	0.0229251	0.020028	0.0146709	0.0115128	0.00936668	0.00755842		JOR	0.0535241	0.0483099	0.0441155	0.041793	0.0365691	0.0319072	0.0292153	0.0242689	0.0210299	0.0153592	0.0120869	0.00981296	0.00795331		JOR	0.0535241	0.0431848	0.0337563
LBN	Developing country	0.0506717	0.0462246	0.034669	0.0254694	0.0190211	0.0153063	0.0124789	0.0108092	0.00950236	0.00759816	0.00624166	0.00526631	0.00439344		LBN	0.0506717	0.0508477	0.0425127	0.0372037	0.0305062	0.0253927	0.0211338	0.0169303	0.0148578	0.011123	0.00901184	0.00764056	0.00642887		LBN	0.0446913	0.0492323	0.041907	0.035317	0.0287168	0.0241373	0.0217163	0.0179228	0.0156011	0.0116449	0.00946122	0.0080046	0.00676475		LBN	0.0446913	0.0440093	0.0320664
SYR	Developing country	0.110323	0.0894362	0.0620378	0.0446331	0.0325136	0.0252453	0.0197428	0.0164595	0.0139605	0.0104846	0.00806551	0.0063414	0.00493482		SYR	0.110323	0.098381	0.0760736	0.0651966	0.0521456	0.0418811	0.0334357	0.0257804	0.0218285	0.0153485	0.0116452	0.00920033	0.00722106		SYR	0.112421	0.0952555	0.0749896	0.0618902	0.0490868	0.0398104	0.0343572	0.0272916	0.0229205	0.0160686	0.0122259	0.00963869	0.00759833		SYR	0.112421	0.0851501	0.0573806
IRQ	Developing country	0.0206265	0.0270644	0.0247214	0.0239	0.02293	0.0224911	0.0215446	0.0213364	0.020834	0.0190088	0.0162241	0.0131311	0.0101093		IRQ	0.0206265	0.0297712	0.0303145	0.0349113	0.0367755	0.037312	0.0364871	0.0334189	0.0325759	0.0278271	0.0234247	0.0190511	0.0147928		IRQ	0.0308676	0.0288254	0.0298826	0.0331409	0.0346182	0.0354672	0.0374927	0.0353779	0.0342055	0.0291327	0.0245928	0.0199588	0.0155657		IRQ	0.0308676	0.0257674	0.0228655
YEM	Developing country	0.0680063	0.177279	0.13941	0.110661	0.085597	0.069252	0.0556689	0.0469062	0.0396439	0.0290996	0.0221877	0.0174259	0.0135934		YEM	0.0680063	0.19501	0.170951	0.161645	0.137281	0.114887	0.0942785	0.0734685	0.0619869	0.0425992	0.0320351	0.0252821	0.019891		YEM	0.206188	0.188814	0.168515	0.153447	0.129229	0.109207	0.0968768	0.0777752	0.0650878	0.0445978	0.0336326	0.0264867	0.0209303		YEM	0.206188	0.168783	0.128945
KWT	Developing country	0.0114241	0.00635928	0.00568214	0.0052754	0.00472881	0.00445298	0.00414245	0.00403476	0.00392343	0.00372849	0.00349644	0.00320116	0.0028144		KWT	0.0114241	0.00699529	0.0069677	0.00770589	0.00758412	0.00738736	0.00701548	0.00631958	0.00613465	0.00545817	0.00504824	0.00464435	0.00411828		KWT	0.00713055	0.00677305	0.00686842	0.0073151	0.00713924	0.00702212	0.00720882	0.00669003	0.00644153	0.00571425	0.00529997	0.00486564	0.00433345		KWT	0.00713055	0.00605452	0.00525558
QAT	Developing country	0.00800262	0.00330297	0.003054	0.00306729	0.00298921	0.00297376	0.00286782	0.00282937	0.00274071	0.00253944	0.00235344	0.00221308	0.00205446		QAT	0.00800262	0.00363331	0.00374495	0.00448046	0.00479412	0.00493337	0.00485682	0.0044316	0.00428536	0.00371751	0.00339795	0.00321081	0.00300626		QAT	0.00368887	0.00351789	0.00369159	0.00425324	0.0045129	0.00468946	0.00499068	0.00469137	0.00449973	0.00389192	0.00356739	0.00336379	0.00316333		QAT	0.00368887	0.00314468	0.00282473
OMN	Developing country	0.0191616	0.0118238	0.0107172	0.00981787	0.00874449	0.00812122	0.00743107	0.0069299	0.00639351	0.00541718	0.00463338	0.00400631	0.00339422		OMN	0.0191616	0.0130063	0.0131419	0.0143412	0.0140245	0.0134728	0.012585	0.0108542	0.00999684	0.00793026	0.00668977	0.0058125	0.00496672		OMN	0.0126286	0.0125931	0.0129547	0.0136139	0.0132018	0.0128067	0.0129318	0.0114905	0.0104969	0.00830232	0.00702336	0.00608944	0.00522621		OMN	0.0126286	0.0112572	0.00991266
ARE	Developed income	0.00701164	0.00491725	0.00447644	0.0043633	0.00413188	0.0040453	0.00389844	0.00389624	0.00384386	0.00368564	0.00349245	0.00330689	0.00304111		ARE	0.00701164	0.00540903	0.00548922	0.00637358	0.00662675	0.00671102	0.00660224	0.00610263	0.00601023	0.00539544	0.00504247	0.00479775	0.00445002		ARE	0.00563282	0.00523719	0.005411	0.00605035	0.00623803	0.00637922	0.0067842	0.00646036	0.00631089	0.00564857	0.00529392	0.00502635	0.00468251		ARE	0.00563282	0.00468159	0.00414039
PAK	Developing country	0.0716793	0.0778657	0.0699721	0.0604385	0.0540772	0.0468643	0.0382103	0.0320017	0.0271829	0.0196938	0.0143285	0.0106871	0.00818656		PAK	0.0716793	0.0812469	0.0767672	0.0736972	0.0678037	0.0618173	0.0531467	0.0441787	0.0378927	0.0270798	0.0198895	0.0151532	0.0115756		PAK	0.082145	0.082077	0.0783324	0.076345	0.0702466	0.0628186	0.0555811	0.047035	0.0397193	0.028735	0.0211607	0.016052	0.0122823		PAK	0.082145	0.0746338	0.0650549
CAN	Developed income	0.0163189	0.0136359	0.0116611	0.00921087	0.00835926	0.00746606	0.00645201	0.00625844	0.00601229	0.00552926	0.00497342	0.00442414	0.00388496		CAN	0.0163189	0.0147216	0.0142964	0.0123331	0.0147084	0.0184767	0.0121789	0.00869263	0.0084276	0.0076229	0.00659501	0.00591299	0.00518732		CAN	0.0168257	0.0147561	0.0134618	0.0121218	0.0123864	0.013642	0.012627	0.0101045	0.00868243	0.00793696	0.00711582	0.00633586	0.0055489		CAN	0.0168257	0.013372	0.0106756
PRI	Developing country	0.0185424	0.0126559	0.0112081	0.00937025	0.0086059	0.0101301	0.00663104	0.00640615	0.00624916	0.00572932	0.00520347	0.00462947	0.00407508		PRI	0.0185424	0.0136521	0.0127839	0.0118565	0.0125085	0.0125417	0.0112923	0.0095819	0.00913848	0.0074881	0.00665845	0.00595686	0.00519126		PRI	0.0137413	0.0132754	0.0131455	0.0124748	0.0116063	0.010832	0.0107527	0.00956383	0.00906899	0.00823081	0.00733723	0.00647588	0.00562747		PRI	0.0137413	0.0123469	0.0106489
AUS	Developed income	0.0189075	0.0143825	0.0120675	0.00946194	0.00853896	0.00755811	0.00647436	0.00622029	0.0059096	0.00535657	0.00479284	0.00425958	0.003746		AUS	0.0189075	0.0155276	0.0147948	0.0126693	0.0150246	0.0187045	0.0122211	0.00863964	0.00828366	0.00738482	0.00635554	0.00569305	0.00500177		AUS	0.0182194	0.015564	0.013931	0.0124522	0.0126527	0.0138102	0.0126707	0.0100429	0.00853414	0.00768907	0.00685744	0.00610019	0.00535042		AUS	0.0182194	0.0141041	0.0110478
JPN	Developing country	0.0148995	0.0127785	0.0109813	0.00910797	0.00793031	0.00717459	0.00628628	0.00589131	0.00557269	0.00502765	0.00451752	0.00396633	0.00332211		JPN	0.0148995	0.0132688	0.0121506	0.011123	0.0106533	0.0105223	0.00965137	0.00882196	0.00838991	0.00750554	0.00667158	0.00590234	0.00491079		JPN	0.0148998	0.013363	0.0123585	0.0115731	0.0109808	0.0106068	0.0101558	0.00951475	0.00888818	0.00797671	0.0071264	0.00626114	0.00524555		JPN	0.0148998	0.0124092	0.0103951
NZL	Developing country	0.0243814	0.0191272	0.0162646	0.012785	0.0114297	0.00990971	0.00823139	0.00765625	0.00705833	0.00603556	0.0051182	0.00433084	0.00366073		NZL	0.0243814	0.0206501	0.0199403	0.0171188	0.0201109	0.0245242	0.0155377	0.0106341	0.00989386	0.00832091	0.00678699	0.00578829	0.00488792		NZL	0.0235698	0.0206984	0.0187761	0.0168255	0.0169361	0.0181071	0.0161093	0.0123613	0.010193	0.00866373	0.00732296	0.00620224	0.00522864		NZL	0.0235698	0.0187569	0.0148901
IDN	Developing country	0.0274388	0.0284173	0.0246416	0.0211668	0.0191371	0.016997	0.0143466	0.0125428	0.0111998	0.00911872	0.00742728	0.00609458	0.00507728		IDN	0.0274388	0.0296513	0.0270346	0.0258103	0.0239947	0.0224202	0.0199547	0.0173155	0.0156124	0.0125386	0.0103099	0.00864149	0.00717917		IDN	0.0325073	0.0299543	0.0275858	0.0267376	0.0248593	0.0227834	0.0208687	0.018435	0.016365	0.013305	0.0109688	0.00915401	0.00761745		IDN	0.0325073	0.0272378	0.0229099
MYS	Developing country	0.0203051	0.0129681	0.0117714	0.0105592	0.00995929	0.00922141	0.00810064	0.00733902	0.00677227	0.00585505	0.00501564	0.00430999	0.0037551		MYS	0.0203051	0.0135312	0.0129146	0.0128756	0.0124873	0.0121637	0.0112672	0.0101316	0.00944047	0.00805094	0.00696228	0.00611113	0.00530963		MYS	0.0142401	0.0136695	0.0131779	0.0133382	0.0129372	0.0123607	0.0117833	0.0107866	0.00989555	0.00854305	0.00740724	0.00647358	0.00563378		MYS	0.0142401	0.0124299	0.0109442
SGP	Developing country	0.00902492	0.0039842	0.00382519	0.00364629	0.00367626	0.00364259	0.00343094	0.00333531	0.00330509	0.00327153	0.00317537	0.00307728	0.00300694		SGP	0.00902492	0.0041572	0.00419666	0.0044462	0.00460941	0.00480483	0.00477209	0.00460443	0.00460726	0.0044985	0.00440777	0.00436327	0.00425175		SGP	0.00413927	0.00419968	0.00428223	0.00460594	0.00477549	0.00488266	0.00499067	0.00490212	0.00482936	0.00477346	0.00468948	0.00462205	0.00451132		SGP	0.00413927	0.00381883	0.00355638
BRN	Developed income	0.00762629	0.00506907	0.00488136	0.0045876	0.00453633	0.00438743	0.0040069	0.00376889	0.00359984	0.00330679	0.00301558	0.00276628	0.00256509		BRN	0.00762629	0.00528918	0.0053554	0.00559401	0.00568779	0.00578733	0.00557319	0.00520299	0.00501814	0.00454698	0.00418597	0.00392231	0.00362698		BRN	0.00527716	0.00534322	0.00546459	0.00579498	0.00589272	0.00588107	0.00582847	0.00553939	0.00526004	0.00482491	0.0044535	0.00415493	0.00384841		BRN	0.00527716	0.00485867	0.00453833
PHL	Developing country	0.0622537	0.0441621	0.039747	0.0356962	0.0332794	0.0299938	0.0253405	0.0219789	0.019349	0.0150923	0.0116444	0.0090621	0.00719018		PHL	0.0622537	0.0460797	0.0436069	0.043527	0.0417268	0.0395639	0.0352461	0.0303422	0.0269723	0.0207525	0.0161638	0.0128491	0.0101668		PHL	0.049106	0.0465506	0.044496	0.0450909	0.0432302	0.0402047	0.0368605	0.0323039	0.0282725	0.022021	0.0171968	0.0136112	0.0107874		PHL	0.049106	0.0423291	0.0369538
TLS	Developing country	0.124216	0.21527	0.156989	0.105991	0.0777155	0.0574913	0.0415794	0.031834	0.0253694	0.0169418	0.011704	0.00843166	0.00630874		TLS	0.124216	0.224618	0.172234	0.129243	0.0974422	0.075835	0.0578327	0.0439471	0.0353646	0.0232957	0.0162464	0.0119552	0.00892042		TLS	0.188702	0.226913	0.175746	0.133887	0.100953	0.0770633	0.0604817	0.0467885	0.0370694	0.0247196	0.0172847	0.0126643	0.009465		TLS	0.188702	0.206335	0.145956
KOR	Developing country	0.0155367	0.00870321	0.00783417	0.0068325	0.00632774	0.00577515	0.00501975	0.00451431	0.00417539	0.00362684	0.00313103	0.00272111	0.00240533		KOR	0.0155367	0.00908112	0.00859496	0.00833139	0.00793392	0.00761783	0.00698197	0.00623205	0.00582045	0.00498705	0.00434623	0.00385825	0.00340109		KOR	0.00936273	0.00917391	0.0087702	0.00863071	0.00821978	0.00774122	0.00730178	0.00663498	0.00610103	0.00529188	0.004624	0.00408708	0.00360872		KOR	0.00936273	0.00834197	0.00728363
PNG	Developing country	0.131621	0.170448	0.129957	0.0895514	0.0670448	0.0506231	0.0370051	0.0285073	0.0227676	0.0153417	0.0106771	0.00769743	0.00577161		PNG	0.131621	0.177849	0.142578	0.109197	0.084063	0.0667754	0.0514704	0.0393546	0.0317378	0.0210955	0.0148211	0.0109142	0.00816093		PNG	0.165055	0.179667	0.145485	0.11312	0.0870917	0.067857	0.053828	0.041899	0.0332677	0.0223849	0.0157683	0.0115615	0.00865914		PNG	0.165055	0.163373	0.120825
SLB	Developing country	0.155451	0.176833	0.137552	0.0976949	0.0753239	0.0583074	0.0435038	0.0340603	0.0275355	0.0188754	0.0132556	0.00953338	0.00711263		SLB	0.155451	0.184512	0.150909	0.119127	0.0944435	0.0769115	0.0605094	0.0470205	0.0383842	0.0259544	0.0184003	0.0135174	0.0100571		SLB	0.171381	0.186397	0.153986	0.123407	0.0978463	0.0781573	0.063281	0.0500606	0.0402346	0.0275409	0.0195762	0.0143191	0.0106711		SLB	0.171381	0.169494	0.127885
NCL	Developing country	0.0133992	0.00695672	0.00672009	0.00648871	0.00661855	0.00660384	0.00624236	0.00609142	0.00604837	0.00596929	0.00577772	0.00553651	0.00527119		NCL	0.0133992	0.0072588	0.00737269	0.00791217	0.00829854	0.00871092	0.0086825	0.00840926	0.00843137	0.00820803	0.00802013	0.00785021	0.00745335		NCL	0.00723111	0.00733297	0.00752301	0.00819644	0.00859754	0.00885202	0.0090802	0.00895296	0.00883781	0.00870973	0.0085327	0.0083158	0.00790837		NCL	0.00723111	0.00666797	0.00624784
VUT	Developing country	0.179886	0.162766	0.122966	0.0826295	0.0607256	0.0453945	0.0330346	0.0253629	0.0201975	0.0134959	0.00930691	0.00662716	0.0049082		VUT	0.179886	0.169834	0.134908	0.100756	0.0761397	0.0598785	0.0459478	0.0350137	0.0281551	0.0185575	0.012919	0.00939664	0.00694009		VUT	0.151976	0.171569	0.137658	0.104376	0.078883	0.0608484	0.0480524	0.0372775	0.0295124	0.0196918	0.0137447	0.00995394	0.00736377		VUT	0.151976	0.15601	0.114325
FJI	Developing country	0.0602502	0.0419048	0.0388514	0.0351505	0.0330162	0.0299369	0.0253917	0.0220106	0.0192989	0.0148047	0.0112368	0.00851829	0.00654406		FJI	0.0602502	0.0437244	0.0426244	0.0428616	0.0413968	0.0394888	0.0353173	0.0303858	0.0269025	0.020357	0.0155979	0.0120781	0.00925317		FJI	0.0434322	0.0441712	0.0434934	0.0444015	0.0428883	0.0401284	0.036935	0.0323504	0.0281993	0.0216013	0.0165948	0.0127944	0.00981806		FJI	0.0434322	0.0401655	0.0361212
REU	Developing country	0.0451546	0.0149628	0.0213764	0.0240559	0.0257822	0.02748	0.0273316	0.0231024	0.0223052	0.0218976	0.0227128	0.0232623	0.0238728		REU	0.0451546	0.0201567	0.0234955	0.0281149	0.0310752	0.0329822	0.0337524	0.0304242	0.0308266	0.0313532	0.0320444	0.0330575	0.0334637		REU	0.0181577	0.0203984	0.024004	0.0297804	0.0313	0.0342174	0.0347945	0.0347128	0.0323778	0.0328942	0.034295	0.0345349	0.0354644		REU	0.0181577	0.014391	0.0202126
LKA	Developing country	0.0302519	0.035729	0.0300662	0.0247047	0.0216404	0.0187802	0.015519	0.0132766	0.01159	0.00909729	0.00728973	0.00592259	0.0049222		LKA	0.0302519	0.0372805	0.032986	0.0301243	0.0271334	0.0247724	0.0215854	0.0183285	0.0161563	0.0125092	0.010119	0.00839763	0.00695988		LKA	0.0386115	0.0376614	0.0336586	0.0312066	0.028111	0.0251737	0.0225741	0.0195135	0.0169351	0.0132738	0.0107657	0.00889568	0.00738477		LKA	0.0386115	0.034246	0.0279534
BGD	Developing country	0.0669479	0.0745858	0.0638198	0.0548932	0.0492426	0.0429407	0.0352788	0.0297944	0.0255243	0.0188954	0.0139213	0.0104422	0.0080306		BGD	0.0669479	0.0778245	0.0700175	0.0669354	0.0617419	0.0566418	0.0490693	0.0411315	0.0355807	0.0259819	0.0193243	0.014806	0.0113551		BGD	0.0943234	0.0786197	0.0714451	0.0693402	0.0639665	0.0575592	0.0513169	0.0437908	0.0372958	0.02757	0.0205594	0.0156841	0.0120483		BGD	0.0943234	0.07149	0.059335
BTN	Developing country	0.0632011	0.0395455	0.0284505	0.0201254	0.0158062	0.0126785	0.00994629	0.00825264	0.00707671	0.00542865	0.00430268	0.00353299	0.00299628		BTN	0.0632011	0.0412627	0.0312134	0.0245404	0.0198183	0.0167239	0.0138343	0.0113929	0.00986485	0.00746462	0.00597261	0.00500942	0.00423668		BTN	0.0430929	0.0416843	0.0318498	0.025422	0.0205323	0.0169947	0.014468	0.0121294	0.0103404	0.00792088	0.00635432	0.00530652	0.00449533		BTN	0.0430929	0.0379041	0.0264512
			0.0748991	0.0735211	0.0611812	0.0507964	0.0434348	0.033906	0.0254687	0.0212532	0.0159331	0.0127905	0.0105952	0.00903238				0.091946	0.0817294	0.0738389	0.0642099	0.0550287	0.0456814	0.0353295	0.0303635	0.022653	0.0180018	0.0150855	0.0127098				0.0924773	0.0832928	0.0771844	0.0644417	0.0557195	0.0469272	0.0389741	0.0317795	0.0240285	0.0192669	0.0158981	0.0135316				0.0722979	0.0693473
[truncated: 10 more columns]

## Sheet: Global-level
Year	BaU	EAT	HUS	MED	VEG
2020	0.0318755	0.0318755	0.0318755	0.0318755	0.0318755
2025	0.0294176	0.0281621	0.0307309	0.0308774	0.0271975
2030	0.0256365	0.0242349	0.0271147	0.0276447	0.0228874
2035	0.0238162	0.0204636	0.0255116	0.0265112	0.0181083
2040	0.023098	0.0181894	0.0236575	0.0241126	0.0157694
2045	0.021735	0.0167011	0.0221288	0.0226026	0.0143351
2050	0.0205311	0.0143403	0.0201493	0.0209663	0.0120334
2055	0.0193268	0.0125513	0.0176115	0.0191914	0.00997343
2060	0.0182203	0.0114601	0.0163062	0.0171806	0.00914644
2070	0.0159969	0.00960282	0.0135552	0.0144453	0.00772643
2080	0.0141723	0.00811802	0.0113733	0.0121977	0.00653262
2090	0.0123405	0.00682765	0.00963742	0.0102118	0.00552632
2100	0.0106861	0.00570494	0.00801444	0.00856345	0.00455385
