# Supplementary material for: Transitioning to healthy and sustainable diets has high environmental and affordability trade-offs for developing countries
Source: Research Square preprint supplement (doi:10.21203/rs.3.rs-3278140/v1), 2023-08-29
Supplement: Supplementary file 6 [file 726a7c6a63590ff3bf258e46.xlsx]

## Sheet: Country-level
EAT	Income-group	y2020	y2025	y2030	y2035	y2040	y2045	y2050	y2055	y2060	y2070	y2080	y2090	y2100		HUS	Income-group	y2020	y2025	y2030	y2035	y2040	y2045	y2050	y2055	y2060	y2070	y2080	y2090	y2100		MED	Income-group	y2020	y2025	y2030	y2035	y2040	y2045	y2050	y2055	y2060	y2070	y2080	y2090	y2100		VEG	Income-group
SEN	Developing country	0.143322	0.1502	0.169073	0.103779	0.0859738	0.0716617	0.0596639	0.0487487	0.037449	0.0245496	0.0170261	0.0122527	0.00915715		SEN	Developing country	0.143322	0.175016	0.201396	0.139657	0.110743	0.0944404	0.0781756	0.0640265	0.0499336	0.0340716	0.0238691	0.0172259	0.012814		SEN	Developing country	0.143322	0.180306	0.198572	0.147445	0.125628	0.0995259	0.0827898	0.0676501	0.0540134	0.036125	0.0253101	0.0181848	0.0135141		SEN	Developing country
GMB	Developing country	0.171694	0.218151	0.224254	0.122927	0.0934292	0.0733484	0.0586894	0.0468203	0.0355491	0.0232698	0.0163556	0.0119924	0.00913558		GMB	Developing country	0.171694	0.254194	0.267127	0.165425	0.120347	0.0966632	0.0768987	0.0614936	0.0474003	0.0322954	0.022929	0.01686	0.0127839		GMB	Developing country	0.171694	0.261877	0.26338	0.17465	0.136523	0.101868	0.0814376	0.0649739	0.0512731	0.0342417	0.0243134	0.0177986	0.0134823		GMB	Developing country
MRT	Developing country	0.166441	0.111045	0.126702	0.0783422	0.0657896	0.055661	0.0472262	0.0395471	0.0312822	0.021875	0.01625	0.0125176	0.009997		MRT	Developing country	0.166441	0.129392	0.150925	0.105427	0.0847439	0.0733536	0.0618789	0.051941	0.0417108	0.0303596	0.0227809	0.0175985	0.0139893		MRT	Developing country	0.166441	0.133303	0.148808	0.111306	0.0961344	0.0773036	0.0655313	0.0548806	0.0451188	0.0321893	0.0241563	0.0185781	0.0147535		MRT	Developing country
ESH	Developing country	0.0974556	0.0864748	0.116565	0.0836183	0.0832881	0.0828987	0.08367	0.0845159	0.0843191	0.085116	0.0857174	0.0856925	0.0827166		ESH	Developing country	0.0974556	0.124906	0.145892	0.145636	0.126249	0.127156	0.136259	0.130204	0.130642	0.124387	0.123352	0.124393	0.122778		ESH	Developing country	0.0974556	0.113536	0.135831	0.146602	0.138769	0.132846	0.140976	0.13611	0.13688	0.129948	0.129452	0.129603	0.127772		ESH	Developing country
GNB	Developing country	0.285398	0.355265	0.355269	0.185131	0.132875	0.0982897	0.0743241	0.0562774	0.0407184	0.0244216	0.0159418	0.0109619	0.00792149		GNB	Developing country	0.285398	0.413962	0.423189	0.249135	0.171157	0.129532	0.0973843	0.0739146	0.0542929	0.0338939	0.0223489	0.0154113	0.0110849		GNB	Developing country	0.285398	0.426474	0.417254	0.263028	0.194162	0.136508	0.103132	0.0780978	0.0587289	0.0359366	0.0236982	0.0162692	0.0116905		GNB	Developing country
GIN	Developing country	0.286112	0.299052	0.230403	0.101752	0.0676036	0.0486576	0.0367839	0.0282935	0.0210233	0.0135524	0.00959649	0.00714952	0.00556026		GIN	Developing country	0.286112	0.348461	0.274451	0.13693	0.0870806	0.0641241	0.0481967	0.0371607	0.028032	0.018809	0.0134534	0.0100515	0.00778074		GIN	Developing country	0.286112	0.358994	0.270602	0.144566	0.0987851	0.0675771	0.0510414	0.0392638	0.0303223	0.0199425	0.0142656	0.010611	0.0082058		GIN	Developing country
SLE	Developing country	0.293532	0.376339	0.393348	0.216614	0.163283	0.125872	0.0983134	0.0762915	0.0561793	0.0343952	0.0226201	0.0155756	0.0112329		SLE	Developing country	0.293532	0.438518	0.468548	0.291502	0.210325	0.165882	0.128817	0.100201	0.074908	0.0477361	0.0317113	0.0218976	0.0157187		SLE	Developing country	0.293532	0.451772	0.461977	0.307757	0.238595	0.174815	0.13642	0.105872	0.0810283	0.050613	0.0336259	0.0231166	0.0165774		SLE	Developing country
MLI	Developing country	0.352644	0.270269	0.306034	0.186777	0.153156	0.125822	0.102927	0.0825471	0.0621809	0.0391461	0.0260758	0.0181091	0.013078		MLI	Developing country	0.352644	0.314923	0.364542	0.25135	0.197281	0.165816	0.134861	0.108417	0.0829104	0.0543296	0.0365559	0.0254594	0.0183006		MLI	Developing country	0.352644	0.324441	0.359429	0.265366	0.223798	0.174745	0.142821	0.114553	0.0896845	0.0576039	0.0387629	0.0268767	0.0193004		MLI	Developing country
LBR	Developing country	0.272113	0.513987	0.503251	0.26461	0.193096	0.14494	0.11075	0.0843099	0.0609907	0.0361839	0.023237	0.0157132	0.0111363		LBR	Developing country	0.272113	0.598907	0.599463	0.35609	0.248729	0.191011	0.145113	0.110732	0.0813234	0.0502185	0.0325761	0.0220911	0.0155836		LBR	Developing country	0.272113	0.61701	0.591055	0.375948	0.28216	0.201297	0.153678	0.116999	0.0879678	0.053245	0.0345428	0.0233208	0.0164349		LBR	Developing country
CIV	Developing country	0.172119	0.13245	0.128004	0.0672903	0.049884	0.0385991	0.0308688	0.0248196	0.0191118	0.0130044	0.00954826	0.00732366	0.00585012		CIV	Developing country	0.172119	0.154334	0.152476	0.0905539	0.0642559	0.0508684	0.0404463	0.032598	0.0254832	0.0180485	0.0133858	0.0102963	0.00818636		CIV	Developing country	0.172119	0.158999	0.150337	0.0956036	0.0728925	0.0536076	0.0428337	0.0344429	0.0275653	0.0191362	0.0141939	0.0108695	0.00863359		CIV	Developing country
BFA	Developing country	0.369815	0.260951	0.28222	0.163628	0.1286	0.102267	0.0818706	0.0647795	0.0484556	0.0302937	0.020224	0.0141866	0.0104236		BFA	Developing country	0.369815	0.304065	0.336175	0.220198	0.165651	0.134774	0.107272	0.0850812	0.0646093	0.0420436	0.0283522	0.0199449	0.0145863		BFA	Developing country	0.369815	0.313256	0.33146	0.232477	0.187916	0.142031	0.113604	0.0898964	0.0698882	0.0445775	0.0300639	0.0210552	0.0153832		BFA	Developing country
GHA	Developing country	0.212461	0.185337	0.19304	0.108373	0.0841616	0.0672935	0.0547598	0.0442329	0.0338687	0.0223627	0.0158428	0.011718	0.00903767		GHA	Developing country	0.212461	0.215958	0.229946	0.14584	0.108409	0.0886837	0.0717499	0.0580953	0.0451596	0.0310365	0.0222101	0.0164742	0.0126469		GHA	Developing country	0.212461	0.222486	0.226721	0.153973	0.12298	0.0934592	0.075985	0.0613833	0.0488494	0.0329069	0.023551	0.0173913	0.0133378		GHA	Developing country
TGO	Developing country	0.254607	0.321295	0.348331	0.207334	0.166052	0.133478	0.107192	0.084447	0.0624388	0.0375082	0.0236164	0.0155121	0.0106809		TGO	Developing country	0.254607	0.374379	0.414925	0.279013	0.213893	0.175905	0.14045	0.110913	0.0832543	0.0520565	0.033108	0.0218083	0.0149464		TGO	Developing country	0.254607	0.385695	0.409105	0.294572	0.242642	0.185378	0.14874	0.11719	0.0900565	0.0551938	0.0351069	0.0230224	0.0157629		TGO	Developing country
NER	Developing country	0.475004	0.367701	0.421859	0.262715	0.219185	0.181993	0.149056	0.117903	0.0865351	0.0506651	0.0311945	0.020068	0.0135786		NER	Developing country	0.475004	0.428453	0.502511	0.353541	0.282334	0.239843	0.195303	0.154853	0.115384	0.0703165	0.0437317	0.0282135	0.0190012		NER	Developing country	0.475004	0.441403	0.495463	0.373256	0.320283	0.252758	0.206831	0.163617	0.124811	0.0745542	0.046372	0.0297841	0.0200392		NER	Developing country
BEN	Developing country	0.155889	0.163846	0.188906	0.12126	0.104485	0.0898444	0.0765971	0.063617	0.0493199	0.0322361	0.0219402	0.0153397	0.0110709		BEN	Developing country	0.155889	0.190917	0.225021	0.163182	0.134587	0.118403	0.100363	0.0835544	0.0657619	0.0447395	0.0307581	0.021566	0.0154921		BEN	Developing country	0.155889	0.196687	0.221865	0.172282	0.152677	0.124778	0.106286	0.0882832	0.0711349	0.0474358	0.0326151	0.0227665	0.0163385		BEN	Developing country
DZA	Developing country	0.0300407	0.0311537	0.0387873	0.0257257	0.0240998	0.0222816	0.0204713	0.0185562	0.0164328	0.0129332	0.0103749	0.00842226	0.00668239		DZA	Developing country	0.0300407	0.044999	0.048546	0.0448061	0.0365308	0.0341771	0.0333379	0.0285875	0.0254606	0.0189003	0.01493	0.0122259	0.00991879		DZA	Developing country	0.0300407	0.0409026	0.0451981	0.045103	0.0401534	0.0357065	0.0344921	0.0298841	0.0266763	0.0197453	0.0156683	0.012738	0.0103222		DZA	Developing country
NGA	Developing country	0.0877189	0.109449	0.124649	0.0759203	0.0629949	0.0529229	0.044628	0.036819	0.0285148	0.0189457	0.013313	0.00976328	0.00748341		NGA	Developing country	0.0877189	0.127532	0.148479	0.102167	0.0811442	0.0697451	0.0584745	0.048358	0.0380209	0.0262941	0.0186636	0.0137261	0.0104719		NGA	Developing country	0.0877189	0.131387	0.146397	0.107865	0.0920508	0.0735008	0.0619259	0.0510948	0.0411274	0.0278787	0.0197904	0.0144902	0.011044		NGA	Developing country
CMR	Developing country	0.175809	0.162336	0.171003	0.0971906	0.075958	0.0609309	0.0497102	0.0403514	0.0310555	0.0207199	0.0147904	0.0109473	0.00840448		CMR	Developing country	0.175809	0.189157	0.203696	0.130791	0.0978419	0.0802986	0.0651336	0.0529974	0.0414086	0.0287565	0.0207348	0.0153907	0.0117608		CMR	Developing country	0.175809	0.194874	0.200839	0.138085	0.110993	0.0846226	0.0689781	0.0559968	0.0447918	0.0304896	0.0219866	0.0162474	0.0124033		CMR	Developing country
GAB	Developing country	0.053816	0.0346389	0.0401224	0.0252315	0.0216357	0.0189368	0.0167951	0.0147945	0.0123391	0.00949298	0.00763475	0.00629471	0.00532432		GAB	Developing country	0.053816	0.0403619	0.047793	0.0339546	0.0278691	0.0249561	0.0220061	0.019431	0.0164526	0.013175	0.0107032	0.00884968	0.00745058		GAB	Developing country	0.053816	0.0415819	0.0471227	0.035848	0.031615	0.0263	0.023305	0.0205308	0.0177968	0.013969	0.0113494	0.00934233	0.00785761		GAB	Developing country
GNQ	Developing country	0.0647144	0.0435352	0.0511877	0.0284142	0.0220285	0.0179952	0.0152302	0.0130151	0.0106225	0.00803321	0.00651249	0.00546185	0.00468778		GNQ	Developing country	0.0647144	0.050728	0.0609738	0.0382376	0.028375	0.0237152	0.0199557	0.017094	0.0141637	0.011149	0.0091299	0.00767877	0.00655984		GNQ	Developing country	0.0647144	0.0522613	0.0601186	0.0403699	0.0321889	0.0249922	0.0211335	0.0180614	0.015321	0.011821	0.00968111	0.00810624	0.00691821		GNQ	Developing country
NAM	Developing country	0.0874488	0.0715441	0.0801346	0.0468305	0.0380573	0.0320231	0.0276032	0.0238109	0.0195739	0.0148548	0.0119019	0.00980522	0.00826706		NAM	Developing country	0.0874488	0.0833646	0.0954548	0.0630208	0.0490219	0.042202	0.0361675	0.0312732	0.0260993	0.0206165	0.0166853	0.0137851	0.0115685		NAM	Developing country	0.0874488	0.0858844	0.094116	0.0665351	0.0556109	0.0444746	0.0383023	0.0330432	0.0282318	0.021859	0.0176927	0.0145525	0.0122005		NAM	Developing country
AGO	Developing country	0.0873153	0.108611	0.144217	0.107887	0.103791	0.0940002	0.0806051	0.0658754	0.0499712	0.0314617	0.0210032	0.0147496	0.0108184		AGO	Developing country	0.0873153	0.126555	0.171788	0.145186	0.133693	0.123879	0.105614	0.0865206	0.0666302	0.0436647	0.0294446	0.0207364	0.0151387		AGO	Developing country	0.0873153	0.13038	0.169379	0.153282	0.151663	0.13055	0.111848	0.0914173	0.0720742	0.0462962	0.0312223	0.0218908	0.0159657		AGO	Developing country
COG	Developing country	0.0788299	0.155971	0.1517	0.0760676	0.0552996	0.0427833	0.0344175	0.0279275	0.0216873	0.0149826	0.0111436	0.00860183	0.00687482		COG	Developing country	0.0788299	0.18174	0.180702	0.102366	0.0712317	0.0563826	0.0450961	0.0366799	0.0289172	0.0207938	0.0156223	0.0120932	0.00962027		COG	Developing country	0.0788299	0.187234	0.178168	0.108074	0.080806	0.0594187	0.0477579	0.0387558	0.0312799	0.022047	0.0165655	0.0127665	0.0101458		COG	Developing country
COD	Developing country	0.313303	0.619051	0.600504	0.31048	0.221859	0.163308	0.123122	0.0929992	0.0669839	0.0396527	0.0254601	0.0173773	0.0124783		COD	Developing country	0.313303	0.72133	0.715309	0.417819	0.285778	0.215218	0.161322	0.122145	0.0893146	0.0550328	0.0356927	0.0244305	0.0174615		COD	Developing country	0.313303	0.743133	0.705277	0.441119	0.32419	0.226807	0.170844	0.129058	0.096612	0.0583494	0.0378476	0.0257905	0.0184154		COD	Developing country
LBY	Developing country	0.0326245	0.0116165	0.0139891	0.0092963	0.00869612	0.00824594	0.00797444	0.00765836	0.00718584	0.00630452	0.00554015	0.00482743	0.00404979		LBY	Developing country	0.0326245	0.0167791	0.0175087	0.0161912	0.0131817	0.0126482	0.0129866	0.0117983	0.0111336	0.00921329	0.00797256	0.00700758	0.00601118		LBY	Developing country	0.0326245	0.0152517	0.0163013	0.0162985	0.0144889	0.0132142	0.0134362	0.0123335	0.0116652	0.00962519	0.00836682	0.00730112	0.0062557		LBY	Developing country
TCD	Developing country	0.206213	0.352145	0.379436	0.210062	0.157113	0.12015	0.0931708	0.0719586	0.0527651	0.0319766	0.0208445	0.0143298	0.0103025		TCD	Developing country	0.206213	0.410326	0.451977	0.282685	0.202379	0.158341	0.122079	0.0945102	0.0703556	0.0443793	0.029222	0.0201462	0.0144168		TCD	Developing country	0.206213	0.422729	0.445638	0.298448	0.229581	0.166868	0.129284	0.0998591	0.076104	0.0470539	0.0309863	0.0212677	0.0152044		TCD	Developing country
CAF	Developing country	0.904339	0.703742	0.689966	0.355318	0.254327	0.188554	0.143046	0.108654	0.0786163	0.0466634	0.0296982	0.0198051	0.0138004		CAF	Developing country	0.904339	0.820015	0.821874	0.478159	0.327601	0.248488	0.187428	0.142706	0.104825	0.0647626	0.0416342	0.0278438	0.0193116		CAF	Developing country	0.904339	0.8448	0.810347	0.504823	0.371633	0.261869	0.198491	0.150782	0.11339	0.0686657	0.0441478	0.0293938	0.0203666		CAF	Developing country
ZAF	Developing country	0.0780795	0.0503496	0.0556334	0.0323567	0.02639	0.0224951	0.019733	0.0172938	0.0143752	0.01113	0.00907093	0.00761496	0.00654481		ZAF	Developing country	0.0780795	0.0586683	0.0662694	0.0435431	0.0339931	0.0296454	0.0258555	0.0227136	0.0191676	0.0154469	0.0127166	0.0107058	0.00915848		ZAF	Developing country	0.0780795	0.0604416	0.06534	0.0459713	0.0385621	0.0312418	0.0273816	0.0239991	0.0207336	0.0163779	0.0134844	0.0113018	0.00965881		ZAF	Developing country
BWA	Developing country	0.0455661	0.0318894	0.0363707	0.0227258	0.0195942	0.0174236	0.0157945	0.0142434	0.0121566	0.00981686	0.00828795	0.00714224	0.00628335		BWA	Developing country	0.0455661	0.0371582	0.043324	0.0305826	0.0252394	0.0229619	0.020695	0.0187073	0.0162092	0.0136245	0.0116189	0.0100412	0.0087926		BWA	Developing country	0.0455661	0.0382813	0.0427164	0.032288	0.0286318	0.0241984	0.0219165	0.019766	0.0175336	0.0144456	0.0123204	0.0106002	0.00927295		BWA	Developing country
ZMB	Developing country	0.105733	0.184035	0.204284	0.117466	0.0921196	0.0734685	0.0592488	0.0473687	0.0358495	0.0230057	0.0157636	0.0113437	0.00853372		ZMB	Developing country	0.105733	0.214441	0.243339	0.158076	0.11866	0.0968214	0.0776317	0.0622139	0.0478008	0.0319289	0.022099	0.0159481	0.0119416		ZMB	Developing country	0.105733	0.220923	0.239927	0.166891	0.134609	0.102035	0.0822138	0.0657349	0.0517064	0.0338531	0.0234332	0.0168359	0.012594		ZMB	Developing country
SDN	Developing country	0.102778	0.0843083	0.0974481	0.0605234	0.0514084	0.0429894	0.0360967	0.0301407	0.0247287	0.0168031	0.0115645	0.00809784	0.00564422		SDN	Developing country	0.102778	0.121777	0.121966	0.105413	0.0779255	0.06594	0.0587843	0.0464343	0.0383141	0.0245556	0.0166419	0.011755	0.00837782		SDN	Developing country	0.102778	0.110691	0.113555	0.106111	0.0856532	0.0688909	0.0608193	0.0485405	0.0401435	0.0256535	0.0174649	0.0122474	0.0087186		SDN	Developing country
ZWE	Developing country	0.391111	0.402134	0.457804	0.273686	0.215697	0.168347	0.130658	0.0996884	0.0718844	0.0420522	0.0265345	0.017755	0.012558		ZWE	Developing country	0.391111	0.468574	0.545327	0.368304	0.27784	0.221859	0.171197	0.130931	0.0958488	0.0583629	0.0371989	0.0249616	0.0175731		ZWE	Developing country	0.391111	0.482737	0.537678	0.388843	0.315185	0.233806	0.181302	0.138341	0.10368	0.0618802	0.0394448	0.0263512	0.0185331		ZWE	Developing country
LSO	Developing country	0.1965	0.263418	0.274671	0.148197	0.109421	0.0831569	0.0645845	0.0501264	0.0370621	0.0229115	0.0152056	0.0106225	0.00777913		LSO	Developing country	0.1965	0.30694	0.327183	0.199431	0.140946	0.109589	0.0846228	0.0658358	0.0494177	0.0317981	0.0213169	0.0149341	0.0108857		LSO	Developing country	0.1965	0.316218	0.322594	0.210552	0.15989	0.115491	0.0896176	0.0695618	0.0534553	0.0337145	0.0226039	0.0157654	0.0114804		LSO	Developing country
BDI	Developing country	0.383768	0.929933	0.851799	0.403527	0.271169	0.192549	0.142013	0.105468	0.0747039	0.0427801	0.0268676	0.0179503	0.0125798		BDI	Developing country	0.383768	1.08358	1.01465	0.543034	0.349294	0.253753	0.186075	0.138521	0.0996082	0.0593731	0.0376659	0.0252362	0.0176035		BDI	Developing country	0.383768	1.11633	1.00042	0.573316	0.396243	0.267417	0.197058	0.146361	0.107747	0.0629514	0.0399399	0.026641	0.0185652		BDI	Developing country
RWA	Developing country	0.241933	0.238306	0.252629	0.146957	0.117438	0.095887	0.0791396	0.0643738	0.0492438	0.0322106	0.0224809	0.0162402	0.0121211		RWA	Developing country	0.241933	0.277678	0.300926	0.197763	0.151273	0.126366	0.103694	0.0845484	0.0656604	0.0447041	0.0315162	0.0228319	0.0169617		RWA	Developing country	0.241933	0.286071	0.296706	0.208791	0.171606	0.133171	0.109814	0.0893334	0.0710251	0.0473982	0.0334189	0.0241029	0.0178883		RWA	Developing country
TZA	Developing country	0.181767	0.189122	0.203876	0.119781	0.0964542	0.0790277	0.0653365	0.0533511	0.0411199	0.0272632	0.019163	0.0139718	0.0104994		TZA	Developing country	0.181767	0.220369	0.242853	0.161191	0.124243	0.104148	0.0856082	0.0700712	0.0548282	0.0378378	0.0268647	0.0196429	0.0146923		TZA	Developing country	0.181767	0.22703	0.239447	0.17018	0.140943	0.109756	0.0906612	0.0740369	0.0593079	0.0401182	0.0284867	0.0207364	0.015495		TZA	Developing country
UGA	Developing country	0.342168	0.321053	0.327133	0.179888	0.135826	0.105095	0.0825179	0.0643373	0.0475879	0.0293163	0.0193583	0.0134098	0.00971339		UGA	Developing country	0.342168	0.374097	0.389675	0.242079	0.174958	0.1385	0.10812	0.0845005	0.0634524	0.0406872	0.0271385	0.0188528	0.0135924		UGA	Developing country	0.342168	0.385405	0.38421	0.255579	0.198474	0.145959	0.114502	0.0892828	0.0686368	0.0431393	0.028777	0.0199023	0.014335		UGA	Developing country
MOZ	Developing country	0.273947	0.433132	0.397353	0.210891	0.15521	0.117225	0.0899746	0.0688196	0.0500914	0.0300018	0.0192238	0.0128536	0.00897171		MOZ	Developing country	0.273947	0.504694	0.473319	0.283801	0.199927	0.154487	0.117891	0.0903875	0.0667906	0.0416386	0.02695	0.0180708	0.0125545		MOZ	Developing country	0.273947	0.519949	0.466681	0.299627	0.226799	0.162806	0.124849	0.095503	0.0722476	0.044148	0.0285771	0.0190767	0.0132404		MOZ	Developing country
SWZ	Developing country	0.0700257	0.062013	0.0745054	0.0486787	0.0429068	0.0380183	0.0337188	0.0294221	0.0240949	0.0176169	0.0133428	0.0103594	0.00823466		SWZ	Developing country	0.0700257	0.0722587	0.0887493	0.0655079	0.0552685	0.0501029	0.0441805	0.0386429	0.0321275	0.0244499	0.0187054	0.0145642	0.0115232		SWZ	Developing country	0.0700257	0.0744428	0.0875046	0.069161	0.0626971	0.0528009	0.0467883	0.0408299	0.0347524	0.0259234	0.0198347	0.015375	0.0121527		SWZ	Developing country
MWI	Developing country	0.30181	0.470581	0.491078	0.273906	0.208402	0.161116	0.125528	0.0965479	0.0701751	0.041343	0.0259688	0.0171395	0.0119189		MWI	Developing country	0.30181	0.548331	0.584962	0.368601	0.268443	0.212329	0.164474	0.126806	0.0935696	0.0573787	0.0364058	0.0240962	0.0166788		MWI	Developing country	0.30181	0.564905	0.576758	0.389156	0.304525	0.223763	0.174182	0.133982	0.101215	0.0608367	0.0386038	0.0254376	0.0175899		MWI	Developing country
ETH	Developing country	0.265142	0.298612	0.323675	0.182091	0.138601	0.107305	0.0841961	0.0657562	0.0487702	0.0300784	0.0197407	0.0136064	0.00979338		ETH	Developing country	0.265142	0.347949	0.385556	0.245044	0.178532	0.141414	0.110319	0.0863641	0.0650289	0.0417449	0.0276746	0.0191292	0.0137044		ETH	Developing country	0.265142	0.358466	0.380148	0.258709	0.202529	0.149029	0.116831	0.0912519	0.070342	0.0442608	0.0293455	0.0201941	0.014453		ETH	Developing country
EGY	Developing country	0.0436901	0.0309421	0.0353711	0.0218201	0.0187867	0.0162938	0.0144496	0.0128811	0.0113836	0.009177	0.00755511	0.00628166	0.00512427		EGY	Developing country	0.0436901	0.0446935	0.0442704	0.0380037	0.0284771	0.0249925	0.0235315	0.0198444	0.0176374	0.0134111	0.0108722	0.00911856	0.00760604		EGY	Developing country	0.0436901	0.0406249	0.0412173	0.0382555	0.0313011	0.0261109	0.0243461	0.0207445	0.0184796	0.0140106	0.0114098	0.00950052	0.00791543		EGY	Developing country
KEN	Developing country	0.226387	0.186421	0.204668	0.12296	0.100347	0.082973	0.0689714	0.0564479	0.0435146	0.0288039	0.0202521	0.0147485	0.0111356		KEN	Developing country	0.226387	0.217222	0.243797	0.16547	0.129258	0.109347	0.0903708	0.0741385	0.0580212	0.039976	0.0283915	0.0207348	0.0155826		KEN	Developing country	0.226387	0.223787	0.240378	0.174697	0.146632	0.115235	0.0957049	0.0783344	0.0627618	0.0423853	0.0301056	0.0218891	0.0164339		KEN	Developing country
ERI	Developing country	0.200269	0.208364	0.259804	0.186254	0.181916	0.177279	0.169552	0.155195	0.129549	0.0915818	0.0624431	0.0415635	0.0279933		ERI	Developing country	0.200269	0.24279	0.309473	0.250646	0.234327	0.23363	0.222158	0.203832	0.172737	0.127104	0.0875393	0.0584338	0.0391724		ERI	Developing country	0.200269	0.250128	0.305133	0.264623	0.265823	0.246211	0.23527	0.215368	0.186851	0.134764	0.0928245	0.0616867	0.0413124		ERI	Developing country
SOM	Developing country	0.131829	0.101522	0.130124	0.0978679	0.102496	0.109678	0.118499	0.126207	0.125894	0.13279	0.133125	0.121045	0.101294		SOM	Developing country	0.131829	0.118296	0.155001	0.131703	0.132026	0.14454	0.155265	0.165759	0.167864	0.184295	0.186629	0.170176	0.141745		SOM	Developing country	0.131829	0.121871	0.152827	0.139047	0.149771	0.152323	0.164429	0.175141	0.181579	0.195402	0.197896	0.17965	0.149489		SOM	Developing country
DJI	Developing country	0.102335	0.0628346	0.0708702	0.045268	0.0393661	0.0346671	0.0306991	0.0268185	0.0220487	0.0163887	0.0127286	0.0101303	0.00825752		DJI	Developing country	0.102335	0.0732161	0.0844192	0.0609181	0.0507078	0.0456865	0.040224	0.0352234	0.0293992	0.0227454	0.0178443	0.0142421	0.0115552		DJI	Developing country	0.102335	0.0754291	0.0832352	0.0643151	0.0575234	0.0481466	0.0425982	0.0372169	0.0318012	0.0241162	0.0189217	0.015035	0.0121864		DJI	Developing country
MDG	Developing country	0.251085	0.329244	0.364976	0.217325	0.173852	0.139325	0.111455	0.0878373	0.0653265	0.0403229	0.0264965	0.0181421	0.0129422		MDG	Developing country	0.251085	0.383642	0.434753	0.292459	0.22394	0.183611	0.146036	0.115365	0.0871046	0.0559629	0.0371456	0.0255059	0.0181106		MDG	Developing country	0.251085	0.395238	0.428655	0.308768	0.25404	0.193499	0.154655	0.121894	0.0942215	0.0593356	0.0393882	0.0269258	0.0191		MDG	Developing country
MUS	Developing country	0.0372298	0.0247919	0.0280187	0.0177343	0.0155223	0.0139482	0.0126772	0.0114655	0.00981359	0.00792174	0.00656935	0.00553141	0.00473666		MUS	Developing country	0.0372298	0.0288881	0.0333753	0.0238655	0.0199943	0.0183819	0.0166105	0.0150588	0.0130852	0.0109943	0.00920961	0.00777657	0.00662824		MUS	Developing country	0.0372298	0.0297612	0.0329072	0.0251963	0.0226818	0.0193717	0.017591	0.0159111	0.0141543	0.0116569	0.00976563	0.00820948	0.00699035		MUS	Developing country
ATF	Developing country	0.0322657	0.0185846	0.0193796	0.0180381	0.0179741	0.0178825	0.0178883	0.0177771	0.0177066	0.0173926	0.0171802	0.0166149	0.0163523		ATF	Developing country	0.0322657	0.0219362	0.0269085	0.0246068	0.0243261	0.0242415	0.0243784	0.0240423	0.0242664	0.0239543	0.0238311	0.023847	0.0236248		ATF	Developing country	0.0322657	0.0227253	0.0274124	0.0261129	0.0259101	0.0258147	0.0258453	0.0259045	0.0257776	0.0253106	0.025532	0.0253069	0.0246825		ATF	Developing country
CHN	Developing country	0.0369089	0.0252106	0.0119334	0.0100767	0.00849487	0.00751682	0.00670704	0.00607185	0.00560107	0.00477099	0.00412933	0.00376752	0.00334434		CHN	Developing country	0.0369089	0.0293789	0.0155458	0.0128974	0.0112617	0.00957069	0.00861513	0.00772062	0.00703748	0.00590168	0.0051389	0.00462136	0.00413018		CHN	Developing country	0.0369089	0.0305436	0.0176548	0.0145206	0.0125152	0.0106611	0.00956553	0.00858666	0.00774494	0.00662417	0.00575949	0.00521291	0.00463618		CHN	Developing country
IND	Developing country	0.0449522	0.0496421	0.0437763	0.0335346	0.0272505	0.0229744	0.0199573	0.0174605	0.015269	0.0120615	0.00974975	0.00798562	0.00655931		IND	Developing country	0.0449522	0.0685712	0.0638785	0.048634	0.0371621	0.0322792	0.0282063	0.0246747	0.0219607	0.0173076	0.0140382	0.0116062	0.00983024		IND	Developing country	0.0449522	0.0709257	0.0670322	0.0505978	0.0401237	0.0343128	0.029902	0.026116	0.0231707	0.0184613	0.0147606	0.012169	0.0103066		IND	Developing country
NPL	Developing country	0.096083	0.114821	0.105975	0.0898737	0.0803762	0.0703649	0.0608984	0.0517273	0.0436314	0.0302483	0.0210061	0.0145351	0.0104893		NPL	Developing country	0.096083	0.135528	0.147146	0.122602	0.108781	0.0953867	0.0829934	0.0699573	0.0597956	0.0416601	0.0291382	0.020862	0.0151543		NPL	Developing country	0.096083	0.140403	0.149901	0.130106	0.115864	0.101577	0.0879872	0.0753761	0.0635195	0.0440189	0.0312179	0.0221391	0.0158328		NPL	Developing country
MNG	Developing country	0.0694619	0.0283953	0.0237981	0.0179895	0.0149671	0.0127664	0.0111913	0.00987933	0.00877046	0.00697367	0.00586004	0.00492594	0.0042594		MNG	Developing country	0.0694619	0.0335162	0.0330435	0.0245404	0.0202565	0.0173062	0.0152516	0.0133611	0.0120197	0.00960463	0.00812864	0.00707011	0.00615371		MNG	Developing country	0.0694619	0.0347218	0.0336624	0.0260425	0.0215754	0.0184293	0.0161694	0.014396	0.0127682	0.0101484	0.00870879	0.00750293	0.00642922		MNG	Developing country
MMR	Developing country	0.103106	0.101781	0.09224	0.0761612	0.0677977	0.0602774	0.0540071	0.0481423	0.0430223	0.0340235	0.0270827	0.0212169	0.0170457		MMR	Developing country	0.103106	0.120137	0.128075	0.103896	0.0917572	0.0817121	0.0736018	0.065109	0.0589609	0.0468596	0.0375672	0.0304523	0.0246265		MMR	Developing country	0.103106	0.124458	0.130473	0.110255	0.0977317	0.0870149	0.0780305	0.0701523	0.0626328	0.0495127	0.0402485	0.0323165	0.0257291		MMR	Developing country
LAO	Developing country	0.0743348	0.0572104	0.0494216	0.0392567	0.0334723	0.0285908	0.0247035	0.0213567	0.0185928	0.0139461	0.0106105	0.00808811	0.00635743		LAO	Developing country	0.0743348	0.0675279	0.0686217	0.0535523	0.0453014	0.0387578	0.0336663	0.0288834	0.0254809	0.0192076	0.0147181	0.0116087	0.00918481		LAO	Developing country	0.0743348	0.069957	0.0699068	0.0568301	0.048251	0.041273	0.0356921	0.0311207	0.0270678	0.0202951	0.0157685	0.0123194	0.00959603		LAO	Developing country
THA	Developing country	0.0296532	0.0222062	0.0195894	0.0157247	0.0136287	0.01187	0.0104673	0.00922735	0.00820569	0.00654297	0.00535112	0.00438044	0.00371502		THA	Developing country	0.0296532	0.0262109	0.0271998	0.0214509	0.018445	0.016091	0.0142651	0.0124793	0.0112457	0.00901144	0.00742269	0.00628717	0.00536722		THA	Developing country	0.0296532	0.0271538	0.0277092	0.0227639	0.019646	0.0171352	0.0151234	0.0134459	0.011946	0.00952167	0.00795246	0.00667206	0.00560752		THA	Developing country
KHM	Developing country	0.0999299	0.0886395	0.0733344	0.0558313	0.0457796	0.0376645	0.0315366	0.0263472	0.0222259	0.0157631	0.0114873	0.00837862	0.00632985		KHM	Developing country	0.0999299	0.104625	0.101824	0.0761625	0.0619581	0.0510581	0.0429786	0.0356326	0.03046	0.02171	0.0159343	0.0120257	0.00914496		KHM	Developing country	0.0999299	0.108388	0.103731	0.0808243	0.0659923	0.0543716	0.0455647	0.0383927	0.0323569	0.0229392	0.0170716	0.0127619	0.0095544		KHM	Developing country
VNM	Developing country	0.0815066	0.0466605	0.0402398	0.0325225	0.0282081	0.0244577	0.0214375	0.0187675	0.0165021	0.0126129	0.00994432	0.00781977	0.00635629		VNM	Developing country	0.0815066	0.0550754	0.0558728	0.0443658	0.0381768	0.033155	0.0292154	0.0253817	0.0226157	0.0173714	0.0137941	0.0112236	0.00918316		VNM	Developing country	0.0815066	0.0570565	0.0569192	0.0470813	0.0406625	0.0353066	0.0309733	0.0273477	0.0240241	0.0183549	0.0147786	0.0119107	0.0095943		VNM	Developing country
RUS	Developing country	0.0372757	0.0227684	0.0129008	0.0110886	0.00955175	0.00832327	0.00740892	0.00686036	0.00626066	0.00523388	0.00463239	0.00405719	0.00355843		RUS	Developing country	0.0372757	0.0294229	0.0237146	0.0164226	0.0141011	0.0125555	0.0117658	0.0109398	0.00994842	0.0084757	0.00715618	0.00642096	0.00496392		RUS	Developing country	0.0372757	0.0296504	0.0215561	0.0176782	0.0152303	0.0137037	0.0124332	0.0116899	0.0107705	0.00898816	0.007982	0.00636258	0.00550905		RUS	Developing country
PRK	Developing country	0.120012	0.195581	0.204491	0.197577	0.206354	0.215292	0.225916	0.235504	0.246037	0.266154	0.289898	0.308016	0.332318		PRK	Developing country	0.120012	0.230853	0.283934	0.269526	0.279279	0.29185	0.307882	0.318502	0.337187	0.366566	0.402127	0.44209	0.480112		PRK	Developing country	0.120012	0.239157	0.289252	0.286023	0.297463	0.31079	0.326408	0.343172	0.358186	0.387321	0.430827	0.469154	0.501607		PRK	Developing country
GRL	Developed income	0.00919469	0.00534756	0.00411412	0.00412736	0.00407209	0.00388461	0.00370547	0.00386824	0.00394967	0.00435874	0.00436633	0.00438042	0.00402949		GRL	Developed income	0.00919469	0.00625261	0.00588539	0.00578905	0.00571321	0.00582058	0.00595354	0.00609462	0.00637393	0.00658606	0.00709432	0.00708604	0.00685242		GRL	Developed income	0.00919469	0.00651831	0.00641324	0.00625541	0.0061238	0.00606148	0.00637359	0.00650662	0.00671765	0.00731485	0.00764103	0.00767068	0.00734957		GRL	Developed income
ISL	Developing country	0.0182931	0.00813587	0.00574441	0.00528888	0.00476934	0.00416733	0.00366036	0.00352552	0.00332284	0.00310051	0.00264796	0.00227874	0.00178773		ISL	Developing country	0.0182931	0.00951283	0.00821758	0.00741819	0.00669146	0.00624419	0.00588106	0.00555464	0.00536236	0.00468487	0.00430234	0.00368624	0.00304017		ISL	Developing country	0.0182931	0.00991708	0.0089546	0.00801581	0.00717236	0.00650263	0.006296	0.00593013	0.00565153	0.00520328	0.0046339	0.00399037	0.00326074		ISL	Developing country
ESP	Developed income	0.020485	0.0143592	0.00759494	0.00726436	0.00687098	0.00656143	0.00621837	0.00597807	0.00556901	0.00513829	0.0046055	0.00395973	0.00338215		ESP	Developed income	0.020485	0.0164478	0.0123487	0.0111756	0.0104631	0.0100506	0.00995011	0.00945101	0.00881303	0.00770585	0.00668771	0.00580099	0.00483349		ESP	Developed income	0.020485	0.0170866	0.0131629	0.0124551	0.0115415	0.0109855	0.0105922	0.0101315	0.00950022	0.00832555	0.00729682	0.00632721	0.00532886		ESP	Developed income
IRL	Developing country	0.0112425	0.00575586	0.00305133	0.00302471	0.0029783	0.00296416	0.00294393	0.00298535	0.0029451	0.00303578	0.00300108	0.00282634	0.00261888		IRL	Developing country	0.0112425	0.00659304	0.00496118	0.00465325	0.00453532	0.00454042	0.00471062	0.00471968	0.00466065	0.00455274	0.00435791	0.00414058	0.00374267		IRL	Developing country	0.0112425	0.00684913	0.00528832	0.00518604	0.0050028	0.00496278	0.00501461	0.00505952	0.00502407	0.00491887	0.00475483	0.00451618	0.00412625		IRL	Developing country
PRT	Developing country	0.0311913	0.015931	0.00819866	0.00770851	0.00716078	0.00669041	0.0062159	0.00589158	0.0054469	0.00498988	0.00440512	0.00376359	0.00323177		PRT	Developing country	0.0311913	0.0182481	0.0133303	0.0118589	0.0109044	0.0102482	0.00994616	0.00931428	0.00861979	0.00748329	0.00639674	0.00551365	0.00461858		PRT	Developing country	0.0311913	0.0189569	0.0142093	0.0132167	0.0120283	0.0112015	0.010588	0.00998496	0.00929191	0.00808509	0.00697935	0.0060138	0.00509193		PRT	Developing country
GBR	Developed income	0.0173376	0.0120909	0.00629363	0.00587884	0.00539266	0.00498983	0.00464573	0.00445786	0.00417696	0.00390301	0.00353426	0.0030991	0.00271073		GBR	Developed income	0.0173376	0.0138495	0.0102329	0.00904408	0.00821188	0.00764327	0.0074337	0.00704764	0.00661009	0.0058533	0.00513215	0.00454018	0.00387395		GBR	Developed income	0.0173376	0.0143874	0.0109076	0.0100796	0.00905832	0.00835427	0.00791342	0.00755511	0.00712551	0.00632402	0.00559958	0.00495203	0.00427098		GBR	Developed income
FRA	Developed income	0.01947	0.0126544	0.00661138	0.00618917	0.00570148	0.00530036	0.0049471	0.00475024	0.0044626	0.00423698	0.00388846	0.00343349	0.00301762		FRA	Developed income	0.01947	0.014495	0.0107495	0.0095215	0.00868215	0.00811894	0.00791592	0.00750988	0.00706211	0.00635417	0.00564649	0.00503006	0.00431252		FRA	Developed income	0.01947	0.015058	0.0114583	0.0106117	0.00957706	0.00887418	0.00842676	0.00805064	0.00761278	0.00686517	0.00616076	0.00548635	0.00475451		FRA	Developed income
BEL	Developed income	0.0188492	0.0115196	0.0059679	0.00549689	0.004992	0.00459634	0.00425593	0.00405678	0.00378915	0.00356226	0.00325014	0.00286712	0.00252237		BEL	Developed income	0.0188492	0.0131951	0.00970325	0.00845649	0.00760176	0.00704053	0.00680997	0.00641355	0.00599638	0.00534228	0.00471958	0.00420032	0.00360476		BEL	Developed income	0.0188492	0.0137076	0.0103431	0.00942473	0.00838531	0.00769546	0.00724944	0.00687536	0.00646394	0.00577191	0.00514944	0.00458134	0.0039742		BEL	Developed income
NLD	Developing country	0.0140145	0.00967863	0.00507655	0.00480616	0.00445521	0.00414366	0.00385911	0.00370457	0.00348924	0.00333565	0.00306444	0.00271263	0.0024017		NLD	Developing country	0.0140145	0.0110864	0.008254	0.00739386	0.00678434	0.00634713	0.00617501	0.00585673	0.00552176	0.00500245	0.00444992	0.003974	0.00343231		NLD	Developing country	0.0140145	0.011517	0.00879826	0.00824044	0.00748363	0.00693756	0.0065735	0.00627845	0.00595232	0.00540474	0.00485522	0.00433449	0.00378408		NLD	Developing country
NOR	Developing country	0.0136847	0.00672852	0.00501984	0.00483895	0.00458359	0.00419138	0.00379538	0.00373007	0.00357042	0.00340839	0.00293672	0.00253854	0.00200892		NOR	Developing country	0.0136847	0.0078673	0.00718106	0.00678712	0.00643085	0.00628023	0.00609799	0.00587692	0.0057619	0.00515008	0.00477152	0.0041065	0.00341631		NOR	Developing country	0.0136847	0.00820162	0.00782511	0.0073339	0.00689302	0.00654016	0.00652824	0.00627421	0.00607261	0.00571997	0.00513923	0.00444531	0.00366417		NOR	Developing country
LUX	Developing country	0.0108867	0.00568572	0.00306421	0.00299312	0.00288664	0.00281735	0.00275218	0.00275538	0.0026975	0.00276251	0.0026591	0.0024402	0.00222129		LUX	Developing country	0.0108867	0.00651269	0.00498213	0.00460465	0.00439575	0.00431553	0.0044038	0.0043561	0.00426882	0.00414291	0.00386132	0.00357488	0.00317448		LUX	Developing country	0.0108867	0.00676567	0.00531064	0.00513187	0.00484884	0.00471697	0.00468799	0.00466977	0.00460168	0.00447608	0.00421301	0.00389917	0.00349982		LUX	Developing country
DEU	Developed income	0.0174937	0.0107774	0.00570466	0.00541387	0.00499485	0.00464847	0.00434244	0.00417096	0.00390801	0.00367822	0.0033372	0.00293199	0.00257428		DEU	Developed income	0.0174937	0.012345	0.00927525	0.00832876	0.0076061	0.00712039	0.0069484	0.00659407	0.00618447	0.0055162	0.004846	0.00429536	0.00367894		DEU	Developed income	0.0174937	0.0128245	0.00988685	0.00928238	0.00839009	0.00778274	0.0073968	0.00706888	0.00666671	0.0059598	0.00528737	0.004685	0.00405599		DEU	Developed income
CHE	Developed income	0.0130776	0.00732856	0.00536749	0.00508231	0.00467209	0.00412533	0.00363614	0.00350516	0.0033019	0.00308907	0.00263792	0.00226746	0.00178575		CHE	Developed income	0.0130776	0.00856889	0.00767839	0.00712846	0.00655501	0.00618125	0.00584215	0.00552256	0.00532857	0.00466759	0.00428605	0.00366799	0.00303678		CHE	Developed income	0.0130776	0.00893303	0.00836705	0.00770273	0.00702611	0.00643709	0.00625434	0.00589589	0.00561591	0.0051841	0.00461634	0.00397061	0.00325711		CHE	Developed income
ITA	Developing country	0.0208509	0.0146059	0.00766243	0.00721823	0.00668912	0.00622565	0.00576809	0.00546487	0.00505397	0.00464711	0.00414596	0.00357037	0.00307525		ITA	Developing country	0.0208509	0.0167303	0.0124584	0.0111046	0.0101861	0.00953626	0.00922961	0.00863966	0.00799796	0.00696923	0.00602041	0.00523058	0.00439488		ITA	Developing country	0.0208509	0.0173802	0.0132799	0.0123761	0.011236	0.0104233	0.00982523	0.00926176	0.0086216	0.00752968	0.00656874	0.00570505	0.0048453		ITA	Developing country
DNK	Developed income	0.0208096	0.0107734	0.00571486	0.00549289	0.00515114	0.00482616	0.00450297	0.00432506	0.0040729	0.00385804	0.00348935	0.00304006	0.00265419		DNK	Developed income	0.0208096	0.0123404	0.00929183	0.00845032	0.0078441	0.00739257	0.00720527	0.0068377	0.00644542	0.00578587	0.00506693	0.00445367	0.00379314		DNK	Developed income	0.0208096	0.0128197	0.00990453	0.00941786	0.00865263	0.00808025	0.00767025	0.00733005	0.006948	0.00625116	0.00552842	0.00485768	0.00418189		DNK	Developed income
AUT	Developed income	0.0190139	0.0107169	0.00559775	0.00523589	0.00479612	0.00443239	0.00412	0.00394102	0.00369046	0.00345466	0.00312109	0.00273555	0.00239335		AUT	Developed income	0.0190139	0.0122757	0.00910143	0.00805495	0.00730348	0.00678939	0.00659248	0.00623055	0.0058402	0.00518092	0.00453219	0.00400757	0.00342037		AUT	Developed income	0.0190139	0.0127525	0.00970157	0.00897722	0.00805628	0.00742096	0.00701791	0.00667918	0.00629559	0.00559756	0.00494497	0.00437111	0.00377092		AUT	Developed income
SWE	Developing country	0.0139538	0.0107301	0.00559744	0.00524475	0.00483347	0.00450098	0.00421921	0.00409363	0.00388435	0.0036779	0.00336755	0.00298866	0.00262907		SWE	Developing country	0.0139538	0.0122907	0.00910091	0.00806859	0.00736035	0.00689447	0.00675122	0.00647182	0.00614703	0.00551572	0.00489007	0.00437838	0.00375724		SWE	Developing country	0.0139538	0.0127681	0.00970102	0.00899242	0.00811901	0.00753581	0.00718689	0.00693782	0.00662634	0.00595929	0.00533545	0.00477555	0.00414232		SWE	Developing country
CZE	Developed income	0.020265	0.013344	0.00648605	0.00568891	0.00499485	0.00452185	0.00411772	0.00387601	0.00357174	0.00320818	0.00283039	0.00245065	0.00212782		CZE	Developed income	0.020265	0.0152849	0.0105457	0.00875188	0.0076061	0.00692644	0.00658883	0.00612776	0.00565232	0.00481128	0.00411005	0.00359019	0.0030409		CZE	Developed income	0.020265	0.0158786	0.0112411	0.00975395	0.0083901	0.00757075	0.00701403	0.006569	0.00609305	0.0051982	0.00448439	0.00391587	0.00335256		CZE	Developed income
HRV	Developing country	0.0286068	0.0201743	0.0102415	0.00953631	0.00879851	0.00824944	0.00777606	0.00752798	0.00712827	0.00682622	0.00630578	0.00563101	0.00502183		HRV	Developing country	0.0286068	0.0231086	0.0166517	0.0146708	0.0133983	0.0126362	0.0124426	0.0119013	0.0112806	0.0102372	0.00915671	0.00824941	0.00717678		HRV	Developing country	0.0286068	0.0240062	0.0177496	0.0163505	0.0147793	0.0138117	0.0132455	0.0127583	0.0121602	0.0110605	0.00999069	0.00899773	0.00791232		HRV	Developing country
SVN	Developing country	0.018813	0.0131028	0.00664127	0.00615251	0.00563105	0.00522832	0.00487432	0.00467348	0.00437827	0.00411587	0.00375779	0.00331901	0.00292281		SVN	Developing country	0.018813	0.0150086	0.0107981	0.00946509	0.0085749	0.00800858	0.00779947	0.00738853	0.00692866	0.00617253	0.00545675	0.00486234	0.00417704		SVN	Developing country	0.018813	0.0155915	0.0115101	0.0105488	0.00945875	0.00875356	0.0083028	0.00792055	0.00746892	0.00666892	0.00595374	0.00530341	0.00460513		SVN	Developing country
SJM	Developing country	0.00882396	0.00517177	0.00397887	0.00395041	0.00384669	0.00362103	0.00340775	0.00350914	0.00353365	0.00379069	0.00368821	0.00359072	0.00320232		SJM	Developing country	0.00882396	0.00604708	0.00569191	0.00554085	0.00539697	0.00542564	0.0054752	0.00552883	0.00570257	0.00572773	0.00599252	0.00580858	0.00544576		SJM	Developing country	0.00882396	0.00630405	0.00620241	0.00598722	0.00578484	0.0056502	0.0058615	0.00590259	0.00601009	0.00636155	0.00645432	0.00628782	0.00584086		SJM	Developing country
POL	Developing country	0.0233501	0.0153721	0.00763754	0.00696466	0.00632285	0.00586936	0.005508	0.00532316	0.00501991	0.00470067	0.00425119	0.00375101	0.00330038		POL	Developing country	0.0233501	0.0176079	0.0124179	0.0107145	0.00962837	0.00899052	0.00881343	0.00841563	0.00794407	0.00704956	0.00617322	0.00549523	0.00471663		POL	Developing country	0.0233501	0.0182919	0.0132368	0.0119413	0.0106208	0.00982683	0.00938219	0.0090216	0.0085635	0.00761648	0.00673547	0.00599371	0.00520003		POL	Developing country
BIH	Developing country	0.0499274	0.0310247	0.0198873	0.0166653	0.0139501	0.0115493	0.00976925	0.00915457	0.00840903	0.0077144	0.00654868	0.00567984	0.00456065		BIH	Developing country	0.0499274	0.0362755	0.0284494	0.0233747	0.0195722	0.0173051	0.0156961	0.0144235	0.0135704	0.0116565	0.0106402	0.00918807	0.0077557		BIH	Developing country	0.0499274	0.037817	0.031001	0.0252578	0.0209788	0.0180214	0.0168036	0.0153985	0.0143022	0.0129463	0.0114601	0.00994614	0.00831839		BIH	Developing country
HUN	Developing country	0.0270912	0.016432	0.00823561	0.00753646	0.00684592	0.00628474	0.00576621	0.00544258	0.00502252	0.00456473	0.00400533	0.003413	0.00293048		HUN	Developing country	0.0270912	0.018822	0.0133903	0.0115942	0.0104249	0.00962677	0.0092266	0.00860443	0.0079482	0.00684568	0.0058162	0.00500003	0.00418799		HUN	Developing country	0.0270912	0.0195531	0.0142733	0.0129217	0.0114994	0.0105223	0.00982202	0.009224	0.00856796	0.0073962	0.00634593	0.0054536	0.00461721		HUN	Developing country
SVK	Developing country	0.0204211	0.0145506	0.00719348	0.00643462	0.00572809	0.00521319	0.00479381	0.00455204	0.00422529	0.00386237	0.00343302	0.00299102	0.00261074		SVK	Developing country	0.0204211	0.0166669	0.0116959	0.0098991	0.00872267	0.0079854	0.00767064	0.00719654	0.00668658	0.00579236	0.00498514	0.00438184	0.00373104		SVK	Developing country	0.0204211	0.0173143	0.0124672	0.0110325	0.00962176	0.00872822	0.00816566	0.00771473	0.00720796	0.00625817	0.00543918	0.00477933	0.00411343		SVK	Developing country
MNE	Developing country	0.0472654	0.027242	0.0185617	0.0165039	0.0145428	0.0125312	0.0108865	0.0103529	0.0096103	0.00882469	0.00744906	0.00634944	0.00497803		MNE	Developing country	0.0472654	0.0318526	0.0265532	0.0231484	0.0204038	0.0187764	0.0174912	0.0163115	0.015509	0.0133341	0.0121031	0.0102713	0.00846549		MNE	Developing country	0.0472654	0.0332062	0.0289346	0.0250132	0.0218701	0.0195535	0.0187253	0.0174142	0.0163453	0.0148096	0.0130358	0.0111187	0.00907968		MNE	Developing country
SRB	Developing country	0.0373145	0.022776	0.0158132	0.0149883	0.0140162	0.012672	0.0114337	0.0112331	0.0107338	0.0102962	0.00891431	0.00771128	0.00611387		SRB	Developing country	0.0373145	0.0266307	0.0226214	0.0210226	0.0196649	0.0189873	0.0183705	0.0176983	0.017322	0.0155576	0.0144838	0.0124743	0.0103971		SRB	Developing country	0.0373145	0.0277624	0.0246502	0.0227162	0.0210782	0.0197732	0.0196666	0.0188947	0.0182561	0.0172792	0.0156	0.0135035	0.0111514		SRB	Developing country
ALB	Developing country	0.0538763	0.0302293	0.0206791	0.0187597	0.0166774	0.0143296	0.012372	0.0117128	0.0108425	0.00984658	0.00810902	0.00674605	0.00518004		ALB	Developing country	0.0538763	0.0353455	0.0295823	0.0263124	0.0233987	0.0214709	0.0198779	0.0184542	0.0174974	0.0148782	0.0131754	0.0109128	0.00880902		ALB	Developing country	0.0538763	0.0368475	0.0322354	0.0284321	0.0250803	0.0223596	0.0212804	0.0197017	0.018441	0.0165246	0.0141907	0.0118132	0.00944813		ALB	Developing country
GRC	Developed income	0.0255767	0.0183482	0.00915409	0.00817251	0.00723675	0.00651001	0.00586578	0.0054198	0.0049012	0.00433698	0.0037735	0.00320412	0.00274085		GRC	Developed income	0.0255767	0.0210169	0.0148837	0.0125727	0.01102	0.00997183	0.00938591	0.00856842	0.0077562	0.00650414	0.00547955	0.00469403	0.00391699		GRC	Developed income	0.0255767	0.0218333	0.0158651	0.0140122	0.0121559	0.0108994	0.00999162	0.00918539	0.00836099	0.0070272	0.00597863	0.00511983	0.00431844		GRC	Developed income
MKD	Developing country	0.0358064	0.0272369	0.0175259	0.0146343	0.0122223	0.0101011	0.00850272	0.00790393	0.00722453	0.00646747	0.00539663	0.0046071	0.00364076		MKD	Developing country	0.0358064	0.0318467	0.0250715	0.0205261	0.0171481	0.0151352	0.0136612	0.0124531	0.0116589	0.00977236	0.00876834	0.00745274	0.00619136		MKD	Developing country	0.0358064	0.0332	0.0273201	0.0221797	0.0183805	0.0157616	0.0146251	0.0132949	0.0122876	0.0108537	0.00944405	0.00806763	0.00664056		MKD	Developing country
ROU	Developed income	0.0312715	0.0215084	0.0104982	0.0095713	0.00868349	0.00800014	0.00737702	0.00700327	0.00645082	0.00585884	0.00515506	0.00440748	0.00379792		ROU	Developed income	0.0312715	0.0246368	0.0170692	0.0147246	0.0132231	0.0122544	0.0118041	0.0110718	0.0102085	0.00878645	0.00748574	0.00645695	0.00542767		ROU	Developed income	0.0312715	0.0255937	0.0181947	0.0164105	0.0145861	0.0133943	0.0125658	0.011869	0.0110045	0.00949305	0.00816754	0.00704267	0.00598394		ROU	Developed income
LTU	Developing country	0.0262414	0.0148211	0.00752624	0.00696426	0.00636985	0.00592736	0.00559947	0.00548176	0.00523255	0.0049768	0.00460685	0.00418664	0.00378298		LTU	Developing country	0.0262414	0.0169768	0.012237	0.0107139	0.00969995	0.00907936	0.00895979	0.00866637	0.00828057	0.00746367	0.00668967	0.00613341	0.00540632		LTU	Developing country	0.0262414	0.0176363	0.0130439	0.0119406	0.0106998	0.00992394	0.00953799	0.0092904	0.00892624	0.00806389	0.00729896	0.00668978	0.0059604		LTU	Developing country
LVA	Developing country	0.0309911	0.017552	0.00859179	0.00781366	0.00709994	0.00656136	0.00612784	0.00591197	0.00553912	0.00516992	0.00468128	0.0041078	0.00362041		LVA	Developing country	0.0309911	0.0201049	0.0139695	0.0120206	0.0108117	0.0100505	0.00980525	0.00934651	0.00876573	0.00775329	0.00679775	0.00601792	0.00517398		LVA	Developing country	0.0309911	0.0208858	0.0148906	0.013397	0.0119261	0.0109854	0.010438	0.0100195	0.00944924	0.0083768	0.00741689	0.00656381	0.00570426		LVA	Developing country
FIN	Developed income	0.0177241	0.0119237	0.00622894	0.00581509	0.00532231	0.00493433	0.00459114	0.00439816	0.00413118	0.00388204	0.00351152	0.00307252	0.00268018		FIN	Developed income	0.0177241	0.013658	0.0101277	0.00894601	0.00810476	0.00755826	0.00734635	0.00695326	0.00653765	0.00582186	0.00509913	0.00450123	0.00383029		FIN	Developed income	0.0177241	0.0141885	0.0107955	0.0099703	0.00894015	0.00826135	0.00782043	0.00745394	0.00704742	0.00629005	0.00556356	0.00490955	0.00422285		FIN	Developed income
EST	Developed income	0.0275746	0.0156291	0.00754024	0.00661115	0.00578509	0.0051824	0.00471923	0.00447073	0.00412228	0.00374471	0.00335122	0.00291822	0.00252873		EST	Developed income	0.0275746	0.0179023	0.0122597	0.0101707	0.00880948	0.00793825	0.00755131	0.00706799	0.00652356	0.0056159	0.00486635	0.00427519	0.00361384		EST	Developed income	0.0275746	0.0185977	0.0130681	0.0113352	0.00971751	0.00867668	0.00803862	0.00757692	0.00703223	0.00606753	0.00530957	0.004663	0.00398422		EST	Developed income
BGR	Developing country	0.0288356	0.0221644	0.0103468	0.00891556	0.00775788	0.00694965	0.00630783	0.00591136	0.00542142	0.00494445	0.00445677	0.00391961	0.00347395		BGR	Developing country	0.0288356	0.0253882	0.0168229	0.0137158	0.0118136	0.0106453	0.0100933	0.00934555	0.00857947	0.00741515	0.00647174	0.00574222	0.00496467		BGR	Developing country	0.0288356	0.0263744	0.0179321	0.0152862	0.0130313	0.0116355	0.0107446	0.0100185	0.00924845	0.00801147	0.00706118	0.00626311	0.00547349		BGR	Developing country
BLR	Developing country	0.0418845	0.0245095	0.0139575	0.0119673	0.0102016	0.00873445	0.0076194	0.00693142	0.00625436	0.00511124	0.00445089	0.00384313	0.00332982		BLR	Developing country	0.0418845	0.0316729	0.0256569	0.0177241	0.0150604	0.0131757	0.0121001	0.0110531	0.0099384	0.0082771	0.00687579	0.00608219	0.00464502		BLR	Developing country	0.0418845	0.0319178	0.0233217	0.0190791	0.0162664	0.0143807	0.0127865	0.011811	0.0107596	0.00877754	0.00766925	0.00602688	0.00515513		BLR	Developing country
TUR	Developing country	0.0199074	0.01669	0.0115178	0.0103882	0.00920958	0.00792288	0.00683732	0.00645906	0.00597497	0.00543732	0.00453099	0.00381038	0.0029642		TUR	Developing country	0.0199074	0.0195147	0.0164766	0.0145705	0.0129212	0.0118714	0.0109855	0.0101766	0.00964235	0.0082158	0.00736186	0.00616392	0.00504083		TUR	Developing country	0.0199074	0.020344	0.0179544	0.0157443	0.0138498	0.0123627	0.0117605	0.0108645	0.0101623	0.00912493	0.00792918	0.00667247	0.00540655		TUR	Developing country
MDA	Developing country	0.0523287	0.0348545	0.0197308	0.017924	0.0157696	0.0136036	0.0118239	0.0107543	0.0097277	0.00781722	0.0065674	0.00545366	0.00458116		MDA	Developing country	0.0523287	0.0450415	0.0362696	0.0265462	0.0232803	0.0205208	0.0187771	0.0171493	0.0154577	0.0126592	0.0101454	0.00863104	0.0063906		MDA	Developing country	0.0523287	0.0453897	0.0329684	0.0285758	0.0251446	0.0223975	0.0198421	0.0183252	0.016735	0.0134245	0.0113162	0.00855256	0.0070924		MDA	Developing country
CYP	Developed income	0.0214897	0.0196807	0.0104302	0.0100126	0.0094422	0.00897711	0.00854678	0.00831523	0.00785825	0.00734361	0.00654809	0.00565256	0.00487339		CYP	Developed income	0.0214897	0.0225433	0.0169586	0.0154035	0.0143785	0.0137509	0.0136758	0.0131459	0.0124358	0.0110132	0.00950857	0.00828099	0.00696463		CYP	Developed income	0.0214897	0.0234189	0.0180768	0.0171672	0.0158605	0.01503	0.0145584	0.0140925	0.0134054	0.0118988	0.0103746	0.00903218	0.00767842		CYP	Developed income
IRN	Developing country	0.0257941	0.0239742	0.0292779	0.0187586	0.016732	0.0151034	0.0139627	0.0129342	0.0118164	0.00986965	0.0083313	0.00706257	0.00583853		IRN	Developing country	0.0257941	0.0346288	0.0366441	0.0326716	0.0253626	0.0231667	0.0227386	0.0199263	0.0183081	0.0144233	0.0119892	0.0102522	0.00866623		IRN	Developing country	0.0257941	0.0314764	0.034117	0.0328881	0.0278778	0.0242034	0.0235258	0.0208301	0.0191822	0.0150681	0.0125821	0.0106816	0.00901875		IRN	Developing country
UKR	Developing country	0.0667425	0.0453637	0.0245938	0.0205011	0.0169353	0.014001	0.0117624	0.0103189	0.00904241	0.00702034	0.00581151	0.0048121	0.00403512		UKR	Developing country	0.0667425	0.0586222	0.045209	0.030363	0.0250013	0.0211202	0.0186794	0.016455	0.0143687	0.0113687	0.0089777	0.0076157	0.00562888		UKR	Developing country	0.0667425	0.0590755	0.0410941	0.0326843	0.0270034	0.0230518	0.0197389	0.0175833	0.0155561	0.0120561	0.0100137	0.00754645	0.00624704		UKR	Developing country
GEO	Developing country	0.0374281	0.031177	0.0179319	0.0162601	0.0142295	0.012191	0.0104854	0.00941817	0.00845267	0.00675972	0.00571864	0.0048129	0.00406973		GEO	Developing country	0.0374281	0.0402891	0.0329628	0.024082	0.0210068	0.0183898	0.0166515	0.0150186	0.0134316	0.0109466	0.00883422	0.00761696	0.00567717		GEO	Developing country	0.0374281	0.0406007	0.0299625	0.0259231	0.022689	0.0200717	0.017596	0.0160484	0.0145415	0.0116085	0.00985369	0.0075477	0.00630063		GEO	Developing country
ARM	Developing country	0.0500201	0.0355046	0.0210899	0.019642	0.0177403	0.015724	0.0140053	0.0129919	0.0119737	0.0100415	0.00872909	0.00739994	0.00630455		ARM	Developing country	0.0500201	0.0458816	0.038768	0.0290906	0.0261896	0.0237193	0.0222413	0.0207175	0.0190266	0.0162611	0.0134848	0.0117112	0.00879468		ARM	Developing country	0.0500201	0.0462364	0.0352393	0.0313147	0.0282869	0.0258886	0.0235029	0.022138	0.0205989	0.0172442	0.015041	0.0116048	0.00976051		ARM	Developing country
AZE	Developing country	0.0279035	0.0304361	0.0196649	0.0201436	0.0197177	0.0184661	0.0170152	0.0160289	0.0147684	0.01195	0.0100114	0.0081372	0.00658241		AZE	Developing country	0.0279035	0.0393317	0.0361485	0.0298336	0.0291088	0.0278557	0.0270213	0.0255603	0.0234675	0.0193517	0.0154657	0.012878	0.00918229		AZE	Developing country	0.0279035	0.0396358	0.0328582	0.0321145	0.0314399	0.0304032	0.028554	0.0273129	0.0254067	0.0205217	0.0172505	0.0127609	0.0101907		AZE	Developing country
KAZ	Developing country	0.0259458	0.0169623	0.00987519	0.00901056	0.00820904	0.00754441	0.00713189	0.00705798	0.00688739	0.00631429	0.00590629	0.00530946	0.00473349		KAZ	Developing country	0.0259458	0.0219199	0.0181528	0.013345	0.0121189	0.0113806	0.0113259	0.0112549	0.0109443	0.0102253	0.00912412	0.00840282	0.0066031		KAZ	Developing country	0.0259458	0.0220893	0.0165005	0.0143653	0.0130893	0.0124214	0.0119683	0.0120267	0.0118487	0.0108436	0.010177	0.00832641	0.00732824		KAZ	Developing country
TKM	Developing country	0.0377615	0.0244447	0.0129128	0.0103583	0.00865144	0.00733751	0.0064079	0.00592077	0.0055215	0.0049136	0.00462747	0.00433602	0.00406163		TKM	Developing country	0.0377615	0.0315892	0.0237367	0.0153412	0.012772	0.0110685	0.0101762	0.00944149	0.00877387	0.00795704	0.00714857	0.00686225	0.00566587		TKM	Developing country	0.0377615	0.0318335	0.0215762	0.016514	0.0137947	0.0120808	0.0107534	0.0100889	0.00949889	0.00843814	0.00797352	0.00679985	0.00628809		TKM	Developing country
UZB	Developing country	0.0596119	0.0486334	0.0277861	0.024655	0.0213002	0.0181434	0.0155898	0.0139822	0.0125309	0.0100373	0.00842102	0.00703701	0.00594245		UZB	Developing country	0.0596119	0.0628475	0.0510771	0.0365152	0.0314451	0.027369	0.0247576	0.0222966	0.0199121	0.0162543	0.0130089	0.0111369	0.00828957		UZB	Developing country	0.0596119	0.0633334	0.0464281	0.0393069	0.0339632	0.029872	0.0261619	0.0238254	0.0215575	0.017237	0.0145101	0.0110356	0.00919992		UZB	Developing country
AFG	Developing country	0.119316	0.237423	0.216821	0.167685	0.136638	0.110082	0.0886487	0.0708353	0.0568226	0.0364118	0.0237823	0.0155645	0.0106478		AFG	Developing country	0.119316	0.280241	0.301055	0.228749	0.184926	0.149228	0.120812	0.0957995	0.0778739	0.050149	0.0329892	0.0223395	0.0153832		AFG	Developing country	0.119316	0.290322	0.306693	0.24275	0.196967	0.158912	0.128081	0.10322	0.0827236	0.0529884	0.0353437	0.0237071	0.016072		AFG	Developing country
TJK	Developing country	0.0683499	0.112981	0.0608362	0.0488526	0.038278	0.0297713	0.0235957	0.0197917	0.0168009	0.0124227	0.00972415	0.00763551	0.00609475		TJK	Developing country	0.0683499	0.146002	0.111831	0.0723529	0.0565091	0.0449094	0.0374715	0.0315606	0.0266972	0.0201172	0.015022	0.0120841	0.00850202		TJK	Developing country	0.0683499	0.147131	0.101652	0.0778845	0.0610344	0.0490166	0.039597	0.0337246	0.0289033	0.0213335	0.0167555	0.0119742	0.0094357		TJK	Developing country
KGZ	Developing country	0.116841	0.117633	0.0642698	0.0514718	0.0404994	0.0316914	0.0252689	0.0212317	0.0179517	0.0131315	0.0103112	0.00811325	0.00652214		KGZ	Developing country	0.116841	0.152014	0.118142	0.0762321	0.0597885	0.0478058	0.0401288	0.033857	0.028526	0.021265	0.0159289	0.0128401	0.00909821		KGZ	Developing country	0.116841	0.153189	0.107389	0.0820602	0.0645764	0.0521779	0.0424049	0.0361785	0.0308832	0.0225507	0.017767	0.0127234	0.0100974		KGZ	Developing country
MEX	Developing country	0.0272268	0.0245041	0.0184483	0.0163237	0.0143664	0.0126083	0.0111196	0.00985487	0.00873846	0.00698543	0.005664	0.00461627	0.003767		MEX	Developing country	0.0272268	0.0286854	0.0318132	0.0248449	0.0202207	0.0176025	0.0155785	0.0126218	0.0110217	0.00881297	0.0071296	0.00587719	0.00480196		MEX	Developing country	0.0272268	0.0295055	0.0313561	0.0261427	0.0214859	0.0176724	0.0154165	0.0138017	0.0121094	0.00985638	0.00801544	0.00652612	0.00536257		MEX	Developing country
USA	Developed income	0.0122168	0.0077481	0.00473758	0.00453809	0.00437956	0.00423037	0.00412362	0.00402958	0.00392351	0.00374577	0.00357515	0.00336876	0.00316381		USA	Developed income	0.0122168	0.00912548	0.00654598	0.0061886	0.00595931	0.00574561	0.00582753	0.00571279	0.00560349	0.00543136	0.00508681	0.00485503	0.00458478		USA	Developed income	0.0122168	0.0095048	0.00729424	0.00695386	0.00654963	0.00635143	0.00623098	0.00625429	0.0061268	0.00592048	0.00562995	0.00530066	0.00505011		USA	Developed income
GTM	Developing country	0.0315867	0.0460208	0.0348527	0.0314812	0.0278655	0.0242894	0.0211075	0.0183231	0.0158329	0.0119349	0.00905468	0.00689251	0.0052794		GTM	Developing country	0.0315867	0.0538737	0.0601019	0.0479148	0.0392207	0.0339104	0.0295715	0.0234677	0.0199697	0.0150573	0.0113976	0.00877516	0.00672989		GTM	Developing country	0.0315867	0.0554139	0.0592381	0.0504176	0.0416746	0.034045	0.029264	0.0256614	0.0219406	0.01684	0.0128138	0.00974407	0.00751557		GTM	Developing country
ECU	Developing country	0.0411228	0.039646	0.0293268	0.0254665	0.0218091	0.0185966	0.0159852	0.0138153	0.0119472	0.00914702	0.00715298	0.00566695	0.00452783		ECU	Developing country	0.0411228	0.0464111	0.0505727	0.0387603	0.0306962	0.0259627	0.0223952	0.0176943	0.0150687	0.0115401	0.00900387	0.00721485	0.00577183		ECU	Developing country	0.0411228	0.0477379	0.049846	0.0407849	0.0326168	0.0260657	0.0221623	0.0193482	0.0165559	0.0129064	0.0101226	0.00801148	0.00644566		ECU	Developing country
SLV	Developing country	0.0411612	0.0487516	0.0364167	0.0318769	0.0274497	0.0234854	0.0202336	0.0175578	0.0152787	0.0117028	0.00906312	0.00710775	0.00561132		SLV	Developing country	0.0411612	0.0570705	0.0627989	0.048517	0.0386353	0.032788	0.0283472	0.0224876	0.0192707	0.0147645	0.0114083	0.0090492	0.00715301		SLV	Developing country	0.0411612	0.0587021	0.0618964	0.0510513	0.0410526	0.0329181	0.0280524	0.0245896	0.0211726	0.0165125	0.0128257	0.0100484	0.00798808		SLV	Developing country
HND	Developing country	0.0649036	0.0866476	0.0608394	0.0498152	0.0403802	0.0326925	0.0267618	0.0221446	0.0184121	0.0130332	0.00943647	0.00695735	0.00521116		HND	Developing country	0.0649036	0.101433	0.104915	0.0758193	0.056835	0.045642	0.0374932	0.0283621	0.0232228	0.0164429	0.0118782	0.00885771	0.00664291		HND	Developing country	0.0649036	0.104333	0.103407	0.0797798	0.0603911	0.0458231	0.0371034	0.0310132	0.0255148	0.0183897	0.0133541	0.00983574	0.00741843		HND	Developing country
BLZ	Developing country	0.0653977	0.0550826	0.041124	0.0351576	0.0297294	0.0251122	0.0214298	0.0184315	0.0158706	0.0119453	0.00915488	0.00711068	0.00557681		BLZ	Developing country	0.0653977	0.0644818	0.0709164	0.0535103	0.041844	0.0350592	0.030023	0.0236065	0.0200173	0.0150704	0.0115238	0.00905293	0.00710901		BLZ	Developing country	0.0653977	0.0663253	0.0698973	0.0563054	0.0444621	0.0351984	0.0297109	0.0258131	0.0219929	0.0168546	0.0129556	0.0100525	0.00793895		BLZ	Developing country
NIC	Developing country	0.0538821	0.0762176	0.0539206	0.0445073	0.0362647	0.0294881	0.0242024	0.0200242	0.0166454	0.0118332	0.00867862	0.0064934	0.00493632		NIC	Developing country	0.0538821	0.0892232	0.0929838	0.0677406	0.0510424	0.0411683	0.0339074	0.0256465	0.0209946	0.014929	0.0109243	0.00826704	0.00629255		NIC	Developing country	0.0538821	0.091774	0.0916475	0.071279	0.0542361	0.0413317	0.0335549	0.0280437	0.0230666	0.0166965	0.0122816	0.00917984	0.00702717		NIC	Developing country
CRI	Developing country	0.0268755	0.0229198	0.0172724	0.0156592	0.0140754	0.012637	0.011462	0.0104602	0.0095058	0.00787699	0.00653825	0.00545488	0.00456481		CRI	Developing country	0.0268755	0.0268308	0.0297855	0.0238335	0.019811	0.0176426	0.0160582	0.0133971	0.0119895	0.00993777	0.00823007	0.00694485	0.00581897		CRI	Developing country	0.0268755	0.0275979	0.0293574	0.0250784	0.0210506	0.0177126	0.0158912	0.0146494	0.0131728	0.0111144	0.00925264	0.00771167	0.0064983		CRI	Developing country
CUB	Developing country	0.0406227	0.0359848	0.0274866	0.025386	0.0229174	0.0202461	0.0179174	0.0159399	0.0141147	0.0111409	0.00882118	0.00703204	0.00559314		CUB	Developing country	0.0406227	0.0421251	0.0473995	0.0386378	0.0322561	0.0282656	0.0251022	0.0204154	0.0178026	0.0140556	0.0111037	0.00895281	0.00712982		CUB	Developing country	0.0406227	0.0433295	0.0467183	0.0406561	0.0342743	0.0283778	0.0248412	0.0223237	0.0195597	0.0157197	0.0124833	0.00994133	0.00796219		CUB	Developing country
PAN	Developing country	0.0217788	0.0168003	0.0119209	0.0103289	0.00899987	0.00788962	0.00702004	0.00632122	0.00571369	0.0047943	0.00409175	0.00351379	0.00302631		PAN	Developing country	0.0217788	0.0196671	0.020557	0.0157206	0.0126673	0.0110147	0.00983505	0.00809604	0.00720657	0.00604859	0.00515052	0.00447357	0.00385778		PAN	Developing country	0.0217788	0.0202294	0.0202616	0.0165418	0.0134599	0.0110584	0.00973279	0.00885281	0.00791782	0.00676471	0.00579046	0.00496752	0.00430815		PAN	Developing country
PER	Developing country	0.0295871	0.0290921	0.0201857	0.0167184	0.0139836	0.0118437	0.010203	0.00890415	0.00782419	0.00623295	0.00509106	0.00420362	0.0034975		PER	Developing country	0.0295871	0.0340564	0.0348093	0.0254456	0.0196819	0.016535	0.0142944	0.0114042	0.0098685	0.00786362	0.00640841	0.00535181	0.00445842		PER	Developing country	0.0295871	0.03503	0.0343091	0.0267747	0.0209133	0.0166007	0.0141457	0.0124702	0.0108425	0.00879464	0.00720464	0.00594273	0.00497891		PER	Developing country
COL	Developing country	0.0284822	0.0269967	0.0203739	0.0184326	0.0164438	0.0145922	0.0130069	0.0116311	0.0103847	0.00835036	0.00677534	0.00552873	0.00453595		COL	Developing country	0.0284822	0.0316033	0.0351339	0.0280546	0.0231446	0.0203722	0.0182226	0.0148967	0.013098	0.010535	0.00852851	0.00703888	0.00578218		COL	Developing country	0.0284822	0.0325069	0.034629	0.0295201	0.0245927	0.0204531	0.0180331	0.0162892	0.0143907	0.0117823	0.00958816	0.00781608	0.00645721		COL	Developing country
BHS	Developed income	0.0217005	0.0130583	0.0104852	0.0099008	0.00921447	0.00850517	0.00793055	0.00742923	0.00694182	0.00601467	0.00521559	0.00453867	0.00394282		BHS	Developed income	0.0217005	0.0152865	0.0180812	0.0150691	0.0129693	0.0118741	0.0111107	0.00951515	0.00875558	0.00758824	0.00656516	0.00577839	0.00502609		BHS	Developed income	0.0217005	0.0157236	0.0178214	0.0158563	0.0137808	0.0119212	0.0109951	0.0104046	0.00961971	0.00848665	0.00738087	0.00641641	0.00561286		BHS	Developed income
JAM	Developing country	0.0516602	0.0464339	0.0359131	0.0328226	0.0291736	0.0254842	0.0222578	0.0194671	0.0170641	0.0132337	0.0103097	0.00809369	0.00637249		JAM	Developing country	0.0516602	0.0543573	0.0619305	0.0499563	0.0410617	0.0355785	0.031183	0.0249329	0.0215226	0.0166959	0.0129774	0.0103045	0.00812329		JAM	Developing country	0.0516602	0.0559113	0.0610405	0.0525658	0.0436309	0.0357197	0.0308588	0.0272635	0.0236468	0.0186726	0.0145898	0.0114422	0.00907165		JAM	Developing country
CHL	Developed income	0.0251272	0.0191686	0.0141701	0.0124588	0.0108891	0.00952389	0.00845009	0.00759302	0.00683211	0.00560269	0.00466211	0.00390165	0.00326051		CHL	Developed income	0.0251272	0.0224395	0.0244357	0.0189624	0.0153264	0.0132963	0.0118385	0.00972493	0.00861721	0.00706847	0.00586846	0.00496737	0.00415632		CHL	Developed income	0.0251272	0.023081	0.0240846	0.0199529	0.0162853	0.0133491	0.0117154	0.010634	0.00946768	0.00790534	0.0065976	0.00551584	0.00464155		CHL	Developed income
HTI	Developing country	0.0858941	0.148024	0.104116	0.0835314	0.0658353	0.0515393	0.0406832	0.0323833	0.0258808	0.0170701	0.0116863	0.00827388	0.00604875		HTI	Developing country	0.0858941	0.173283	0.179544	0.127136	0.0926629	0.071954	0.056997	0.0414756	0.032643	0.021536	0.0147103	0.0105338	0.00771061		HTI	Developing country	0.0858941	0.178237	0.176964	0.133777	0.0984607	0.0722396	0.0564043	0.0453525	0.0358647	0.0240857	0.016538	0.0116969	0.00861079		HTI	Developing country
BRA	Developing country	0.0369737	0.0258071	0.019571	0.0178128	0.0160822	0.0145079	0.0132049	0.0120506	0.0109704	0.00920824	0.00772064	0.00647718	0.00540103		BRA	Developing country	0.0369737	0.0302107	0.0337493	0.0271112	0.0226356	0.0202545	0.0185	0.015434	0.0138367	0.0116173	0.00971842	0.00824639	0.00688494		BRA	Developing country	0.0369737	0.0310744	0.0332643	0.0285274	0.0240519	0.0203349	0.0183077	0.0168767	0.0152024	0.0129927	0.0109259	0.00915691	0.00768872		BRA	Developing country
ARG	Developing country	0.0355415	0.0230643	0.0167048	0.0140913	0.0120523	0.0104694	0.00923624	0.00823565	0.00737124	0.00605474	0.00507922	0.00429696	0.00364547		ARG	Developing country	0.0355415	0.027	0.0288067	0.0214472	0.0169636	0.0146164	0.0129399	0.010548	0.00929721	0.00763878	0.0063935	0.00547066	0.00464704		ARG	Developing country	0.0355415	0.0277719	0.0283927	0.0225675	0.0180249	0.0146744	0.0128054	0.011534	0.0102148	0.00854317	0.00718788	0.0060747	0.00518956		ARG	Developing country
VEN	Developing country	0.0281795	0.0331226	0.0249964	0.0216069	0.0186223	0.0160624	0.0139965	0.0122983	0.0108303	0.00863171	0.00700178	0.00570943	0.00467338		VEN	Developing country	0.0281795	0.0387746	0.0431053	0.0328859	0.0262109	0.0224247	0.0196091	0.0157513	0.0136601	0.0108899	0.00881354	0.00726894	0.00595737		VEN	Developing country	0.0281795	0.0398831	0.0424858	0.0346037	0.0278509	0.0225137	0.0194052	0.0172236	0.0150082	0.0121793	0.0099086	0.00807154	0.00665286		VEN	Developing country
DOM	Developing country	0.0276137	0.0202306	0.0152887	0.0143648	0.0133322	0.012276	0.0113431	0.0104903	0.00966568	0.00824562	0.00703612	0.00598451	0.00508073		DOM	Developing country	0.0276137	0.0236827	0.0263647	0.0218633	0.0187651	0.0171386	0.0158917	0.0134357	0.0121911	0.0104028	0.00885677	0.00761915	0.00647663		DOM	Developing country	0.0276137	0.0243598	0.0259858	0.0230054	0.0199392	0.0172066	0.0157264	0.0146916	0.0133943	0.0116345	0.00995719	0.00846042	0.00723275		DOM	Developing country
BOL	Developing country	0.056076	0.0549462	0.0382768	0.0313227	0.0255538	0.0208966	0.0173213	0.0145137	0.0122281	0.00894375	0.00672741	0.0051791	0.00405931		BOL	Developing country	0.056076	0.0643221	0.0660066	0.0476735	0.0359669	0.0291737	0.0242671	0.0185887	0.0154231	0.0112836	0.00846817	0.00659375	0.00517458		BOL	Developing country	0.056076	0.066161	0.065058	0.0501638	0.0382173	0.0292895	0.0240147	0.0203263	0.0169452	0.0126196	0.00952032	0.0073218	0.00577869		BOL	Developing country
PRY	Developing country	0.0337929	0.0288627	0.0216989	0.0197145	0.0176082	0.0155376	0.0137267	0.0121419	0.010699	0.00838455	0.00664089	0.00530202	0.00424457		PRY	Developing country	0.0337929	0.0337878	0.0374188	0.0300057	0.0247835	0.021692	0.0192311	0.015551	0.0134945	0.0105781	0.00835926	0.00675024	0.00541074		PRY	Developing country	0.0337929	0.0347538	0.0368811	0.0315731	0.0263341	0.0217781	0.0190311	0.0170046	0.0148263	0.0118305	0.00939788	0.00749557	0.00604242		PRY	Developing country
TTO	Developing country	0.0145777	0.0143631	0.0108695	0.00971796	0.00869988	0.00788392	0.00727742	0.00672688	0.0061604	0.00522941	0.00452528	0.00391376	0.00337465		TTO	Developing country	0.0145777	0.0168139	0.018744	0.0147908	0.0122451	0.0110067	0.0101956	0.00861559	0.00776999	0.00659754	0.00569623	0.00498279	0.00430182		TTO	Developing country	0.0145777	0.0172946	0.0184746	0.0155635	0.0130112	0.0110504	0.0100896	0.00942092	0.00853685	0.00737865	0.00640397	0.00553296	0.00480404		TTO	Developing country
FLK	Developing country	0.00383795	0.00219481	0.00186068	0.0018905	0.00189824	0.00189297	0.00189379	0.00189944	0.00189807	0.00190161	0.00189943	0.00188371	0.00184732		FLK	Developing country	0.00383795	0.00256933	0.00320867	0.00287736	0.00267177	0.00264277	0.00265319	0.00243275	0.002394	0.00239911	0.00239092	0.00239824	0.00235486		FLK	Developing country	0.00383795	0.00264279	0.00316255	0.00302766	0.00283894	0.00265326	0.0026256	0.00266015	0.00263028	0.00268315	0.00268799	0.00266304	0.00262977		FLK	Developing country
GUY	Developing country	0.0563915	0.0216668	0.0169987	0.0169338	0.0166488	0.01599	0.0151738	0.0142718	0.0133354	0.0115229	0.00947059	0.00769098	0.00619358		GUY	Developing country	0.0563915	0.025364	0.0293135	0.0257734	0.0234332	0.0223237	0.0212584	0.0182789	0.0168197	0.0145375	0.0119212	0.00979174	0.00789524		GUY	Developing country	0.0563915	0.0260891	0.0288923	0.0271197	0.0248993	0.0224123	0.0210374	0.0199875	0.0184798	0.0162587	0.0134024	0.0108729	0.00881696		GUY	Developing country
URY	Developed income	0.0263417	0.0182029	0.0135248	0.0120507	0.010712	0.00952929	0.00853444	0.0077042	0.00697767	0.00582395	0.00491785	0.00416858	0.00353213		URY	Developed income	0.0263417	0.021309	0.023323	0.0183413	0.0150771	0.0133038	0.0119567	0.00986732	0.0088008	0.00734761	0.00619037	0.00530721	0.00450257		URY	Developed income	0.0263417	0.0219182	0.0229878	0.0192993	0.0160204	0.0133566	0.0118324	0.0107897	0.00966939	0.00821753	0.00695951	0.0058932	0.00502822		URY	Developed income
SUR	Developing country	0.0351991	0.0404883	0.0283149	0.022862	0.0186663	0.0154528	0.0131002	0.0112855	0.00979944	0.00765449	0.00610948	0.00496191	0.00406052		SUR	Developing country	0.0351991	0.0473972	0.0488277	0.0347963	0.0262727	0.0215737	0.0183534	0.0144541	0.0123598	0.00965707	0.00769035	0.00631724	0.00517613		SUR	Developing country	0.0351991	0.0487522	0.048126	0.0366139	0.0279166	0.0216593	0.0181625	0.0158052	0.0135797	0.0108004	0.00864586	0.00701475	0.00578041		SUR	Developing country
GUF	Developing country	0.0262208	0.0195457	0.0176876	0.0191018	0.020274	0.0212119	0.0221413	0.0230584	0.0238287	0.0252083	0.0261791	0.0266104	0.0264066		GUF	Developing country	0.0262208	0.0228809	0.0305014	0.0290732	0.0285355	0.0296139	0.0310198	0.0295326	0.0300547	0.0318033	0.0329532	0.0338789	0.0336617		GUF	Developing country	0.0262208	0.023535	0.0300631	0.0305918	0.030321	0.0297315	0.0306973	0.0322931	0.033021	0.0355687	0.0370475	0.0376196	0.0375915		GUF	Developing country
SGS	Developing country	0.006086	0.00365802	0.00310084	0.00315118	0.00316384	0.00315471	0.00315673	0.00316585	0.00316318	0.00316935	0.00316619	0.0031394	0.00307923		SGS	Developing country	0.006086	0.00428222	0.00534726	0.00479613	0.0044531	0.00440429	0.00442256	0.00405473	0.00398966	0.00399852	0.00398547	0.00399691	0.00392523		SGS	Developing country	0.006086	0.00440464	0.00527041	0.00504666	0.00473172	0.00442177	0.00437657	0.00443374	0.00438341	0.00447192	0.00448065	0.00443823	0.00438348		SGS	Developing country
MAR	Developing country	0.0621017	0.0484088	0.0522239	0.0295264	0.02358	0.0192133	0.016196	0.0138727	0.0118748	0.00903826	0.0071032	0.00573335	0.0045822		MAR	Developing country	0.0621017	0.0699227	0.0653633	0.0514256	0.0357429	0.0294707	0.0263755	0.0213721	0.0183985	0.0132083	0.0102219	0.00832263	0.00680145		MAR	Developing country	0.0621017	0.0635575	0.0608556	0.0517664	0.0392874	0.0307895	0.0272886	0.0223415	0.019277	0.0137988	0.0107274	0.00867125	0.00707811		MAR	Developing country
TUN	Developing country	0.0432813	0.0371253	0.0386065	0.0209183	0.0165008	0.0135815	0.0117825	0.0104626	0.00927638	0.00754173	0.00637316	0.00550989	0.00465569		TUN	Developing country	0.0432813	0.0536247	0.0483197	0.0364331	0.025012	0.0208322	0.019188	0.0161185	0.0143726	0.0110213	0.00917131	0.00799825	0.00691053		TUN	Developing country	0.0432813	0.0487431	0.0449874	0.0366746	0.0274924	0.0217644	0.0198523	0.0168496	0.0150589	0.0115141	0.00962485	0.00833328	0.00719163		TUN	Developing country
SAU	Developing country	0.0105122	0.00715138	0.00913523	0.0064379	0.00634187	0.00626585	0.00630473	0.00634314	0.00627143	0.00612046	0.0058382	0.00540694	0.0047714		SAU	Developing country	0.0105122	0.0103296	0.0114336	0.0112128	0.00961308	0.00961099	0.0102674	0.00977214	0.00971683	0.00894429	0.00840148	0.00784881	0.00708228		SAU	Developing country	0.0105122	0.00938928	0.0106451	0.0112871	0.0105664	0.0100411	0.0106229	0.0102154	0.0101808	0.00934417	0.00881695	0.00817758	0.00737037		SAU	Developing country
ISR	Developing country	0.0218804	0.0105062	0.0130175	0.00855872	0.00782139	0.00717242	0.0067014	0.00628305	0.00581826	0.00507167	0.00445162	0.00389601	0.00329945		ISR	Developing country	0.0218804	0.0151753	0.0162927	0.0149066	0.0118558	0.0110015	0.0109134	0.00967957	0.00901468	0.00741162	0.00640612	0.00565551	0.00489743		ISR	Developing country	0.0218804	0.0137939	0.0151691	0.0150054	0.0130315	0.0114939	0.0112912	0.0101186	0.00944512	0.00774297	0.00672291	0.00589241	0.00509664		ISR	Developing country
JOR	Developing country	0.0534295	0.0434875	0.0485849	0.0286082	0.0236316	0.0197559	0.0170077	0.0148179	0.0128467	0.0100155	0.00797691	0.00645403	0.00515025		JOR	Developing country	0.0534295	0.0628143	0.0608087	0.0498264	0.035821	0.0303029	0.0276975	0.0228283	0.0199043	0.0146364	0.0114792	0.00936877	0.0076446		JOR	Developing country	0.0534295	0.0570961	0.0566151	0.0501566	0.0393733	0.031659	0.0286564	0.0238637	0.0208547	0.0152907	0.0120469	0.00976121	0.00795556		JOR	Developing country
LBN	Developing country	0.0506717	0.0443178	0.0461526	0.0241752	0.0185573	0.014945	0.0126421	0.0109431	0.00953031	0.0075934	0.00624408	0.00526466	0.00438058		LBN	Developing country	0.0506717	0.0640136	0.0577644	0.0421055	0.0281293	0.0229236	0.020588	0.0168588	0.0147661	0.0110968	0.00898555	0.00764226	0.00650218		LBN	Developing country	0.0506717	0.0581863	0.0537808	0.0423845	0.0309189	0.0239495	0.0213008	0.0176235	0.0154711	0.0115929	0.0094299	0.00796238	0.00676666		LBN	Developing country
SYR	Developing country	0.110323	0.0857469	0.0825869	0.0423651	0.0317207	0.0246493	0.0200011	0.0166635	0.0140016	0.010478	0.00806864	0.0063394	0.00492037		SYR	Developing country	0.110323	0.123855	0.103365	0.0737866	0.0480827	0.0378087	0.0325722	0.0256715	0.0216937	0.0153124	0.0116112	0.00920238	0.0073034		SYR	Developing country	0.110323	0.11258	0.0962371	0.0742756	0.0528509	0.0395007	0.0336999	0.0268359	0.0227296	0.0159969	0.0121854	0.00958785	0.00760048		SYR	Developing country
IRQ	Developing country	0.0206265	0.025948	0.03291	0.0226856	0.0223709	0.0219601	0.0218264	0.0216007	0.0208953	0.0189969	0.0162304	0.013127	0.0100797		IRQ	Developing country	0.0206265	0.0374799	0.04119	0.0395111	0.0339101	0.0336839	0.0355449	0.0332778	0.0323748	0.0277616	0.0233564	0.0190554	0.0149615		IRQ	Developing country	0.0206265	0.034068	0.0383494	0.0397729	0.0372729	0.0351913	0.0367754	0.0347872	0.0339206	0.0290028	0.0245114	0.0198536	0.0155701		IRQ	Developing country
YEM	Developing country	0.0680063	0.169966	0.185588	0.105038	0.0835097	0.0676171	0.056397	0.0474873	0.0397605	0.0290814	0.0221963	0.0174204	0.0135536		YEM	Developing country	0.0680063	0.245503	0.232281	0.182943	0.126585	0.103716	0.0918439	0.0731583	0.0616041	0.0424989	0.0319417	0.0252877	0.0201179		YEM	Developing country	0.0680063	0.223154	0.216262	0.184155	0.139138	0.108357	0.0950234	0.0764766	0.0645456	0.0443989	0.0335212	0.026347	0.0209362		YEM	Developing country
KWT	Developing country	0.0114241	0.00609695	0.00756426	0.00500733	0.0046135	0.00434785	0.00419663	0.00408475	0.00393497	0.00372616	0.0034978	0.00320015	0.00280617		KWT	Developing country	0.0114241	0.00880657	0.0094674	0.00872119	0.0069932	0.00666903	0.00683431	0.0062929	0.00609676	0.00544532	0.00503351	0.00464539	0.00416524		KWT	Developing country	0.0114241	0.00800489	0.0088145	0.00877898	0.0076867	0.00696748	0.00707091	0.00657833	0.00638787	0.00568877	0.00528243	0.00483998	0.00433467		KWT	Developing country
QAT	Developing country	0.00800262	0.00316672	0.00406559	0.00291143	0.00291632	0.00290355	0.00290533	0.00286442	0.00274878	0.00253785	0.00235436	0.00221238	0.00204844		QAT	Developing country	0.00800262	0.00457408	0.00508847	0.00507078	0.00442059	0.00445366	0.0047314	0.00441288	0.00425889	0.00370876	0.00338804	0.00321153	0.00304054		QAT	Developing country	0.00800262	0.00415769	0.00473756	0.00510439	0.00485897	0.00465297	0.0048952	0.00461304	0.00446225	0.00387457	0.00355558	0.00334605	0.00316422		QAT	Developing country
OMN	Developing country	0.0191616	0.0113361	0.0142671	0.00931898	0.00853126	0.00792949	0.00752827	0.00701576	0.00641232	0.00541379	0.00463518	0.00400505	0.00338429		OMN	Developing country	0.0191616	0.016374	0.0178567	0.0162307	0.0129318	0.0121628	0.01226	0.0108084	0.00993511	0.00791159	0.00667026	0.0058138	0.00502336		OMN	Developing country	0.0191616	0.0148835	0.0166252	0.0163383	0.0142142	0.0127071	0.0126844	0.0112986	0.0104095	0.0082653	0.00700012	0.00605733	0.00522769		OMN	Developing country
ARE	Developed income	0.00701164	0.0047144	0.0059592	0.00414159	0.00403112	0.00394979	0.00394943	0.00394452	0.00385517	0.00368333	0.0034938	0.00330585	0.00303221		ARE	Developed income	0.00701164	0.00680959	0.00745851	0.00721333	0.00611043	0.00605846	0.00643175	0.00607686	0.00597311	0.00538274	0.00502776	0.00479883	0.00450076		ARE	Developed income	0.00701164	0.00618969	0.00694415	0.00726113	0.00671638	0.00632958	0.00665441	0.0063525	0.00625832	0.00562339	0.0052764	0.00499984	0.00468384		ARE	Developed income
PAK	Developing country	0.0716793	0.0774626	0.0710369	0.0584646	0.050901	0.043833	0.0377599	0.0321626	0.0273572	0.01953	0.0142801	0.0105103	0.00804525		PAK	Developing country	0.0716793	0.0914324	0.0986344	0.0797548	0.0688893	0.0594201	0.0514598	0.0434976	0.0374923	0.0268981	0.0198083	0.0150852	0.0116233		PAK	Developing country	0.0716793	0.0947213	0.100482	0.0846365	0.0733748	0.0632762	0.0545562	0.0468669	0.0398272	0.0284211	0.0212221	0.0160087	0.0121437		PAK	Developing country
CAN	Developed income	0.0163189	0.0113122	0.00807041	0.00760478	0.00701455	0.00661925	0.00642849	0.00621221	0.00592423	0.00545091	0.00496616	0.00442608	0.00390084		CAN	Developed income	0.0163189	0.0135547	0.0153313	0.0123304	0.0100147	0.0093117	0.00903619	0.00872863	0.00841979	0.00761434	0.00686099	0.00616973	0.00540513		CAN	Developed income	0.0163189	0.0139224	0.0168191	0.0123453	0.0106467	0.00958495	0.00924198	0.00895294	0.00855071	0.00790019	0.00706393	0.00629573	0.0055811		CAN	Developed income
PRI	Developing country	0.0185424	0.0117942	0.00929882	0.008801	0.00825554	0.00770571	0.00722959	0.00681389	0.00642699	0.00575802	0.00515817	0.00458465	0.0040113		PRI	Developing country	0.0185424	0.0138068	0.0160354	0.0133952	0.0116196	0.010758	0.0101286	0.00872704	0.00810624	0.00726443	0.00649288	0.00583692	0.00511338		PRI	Developing country	0.0185424	0.0142015	0.015805	0.0140949	0.0123467	0.0108007	0.0100233	0.00954278	0.00890628	0.0081245	0.0072996	0.00648141	0.00571034		PRI	Developing country
AUS	Developed income	0.0189075	0.0119316	0.00835171	0.00781207	0.00716534	0.00670087	0.00645075	0.00617434	0.00582305	0.00528066	0.00478584	0.00426144	0.00376131		AUS	Developed income	0.0189075	0.0142968	0.0158657	0.0126665	0.01023	0.00942651	0.00906748	0.00867542	0.00827598	0.00737653	0.00661186	0.00594024	0.0052118		AUS	Developed income	0.0189075	0.0146847	0.0174054	0.0126818	0.0108756	0.00970313	0.00927399	0.00889836	0.00840466	0.00765345	0.00680744	0.00606155	0.00538147		AUS	Developed income
JPN	Developing country	0.0148995	0.0111576	0.00836859	0.00768226	0.00690284	0.00660321	0.00633557	0.00594961	0.00559497	0.0049755	0.00446718	0.00393272	0.00329113		JPN	Developing country	0.0148995	0.013024	0.0124081	0.0109364	0.0100989	0.00958969	0.00931811	0.00879148	0.00801065	0.00746494	0.0066835	0.00591396	0.00512822		JPN	Developing country	0.0148995	0.0135033	0.0133087	0.0116572	0.0108704	0.0102269	0.00976852	0.00938786	0.00876303	0.00797166	0.00713	0.00625648	0.00524444		JPN	Developing country
NZL	Developing country	0.0243814	0.0158677	0.0112564	0.0105557	0.00959104	0.00878574	0.00820138	0.00759969	0.00695495	0.00595003	0.00511072	0.00433273	0.0036757		NZL	Developing country	0.0243814	0.0190133	0.0213836	0.017115	0.0136932	0.0123594	0.0115283	0.0106781	0.00988468	0.00831157	0.00706071	0.00603962	0.00509317		NZL	Developing country	0.0243814	0.019529	0.0234589	0.0171357	0.0145573	0.0127221	0.0117908	0.0109526	0.0100384	0.00862359	0.00726956	0.00616296	0.00525898		NZL	Developing country
IDN	Developing country	0.0274388	0.0282702	0.0250166	0.0204755	0.0180131	0.0158976	0.0141775	0.0126059	0.0112716	0.00904288	0.0074022	0.00599373	0.00498964		IDN	Developing country	0.0274388	0.0333685	0.0347354	0.0279318	0.0243789	0.0215508	0.0193213	0.0170485	0.0154474	0.0124545	0.0102678	0.00860269	0.00720872		IDN	Developing country	0.0274388	0.0345688	0.0353859	0.0296414	0.0259663	0.0229494	0.0204839	0.0183691	0.0164094	0.0131597	0.0110007	0.00912933	0.00753146		IDN	Developing country
MYS	Developing country	0.0203051	0.012901	0.0119506	0.0102143	0.00937434	0.00862494	0.00800514	0.00737593	0.00681568	0.00580636	0.00499871	0.00423867	0.00369028		MYS	Developing country	0.0203051	0.0152276	0.0165933	0.0139339	0.0126872	0.011692	0.0109095	0.00997541	0.00934071	0.00799693	0.00693385	0.00608369	0.00533148		MYS	Developing country	0.0203051	0.0157753	0.016904	0.0147868	0.0135133	0.0124507	0.011566	0.0107481	0.00992242	0.00844971	0.00742874	0.00645613	0.00557018		MYS	Developing country
SGP	Developing country	0.00902492	0.00396357	0.0038834	0.00352721	0.00346034	0.00340698	0.00339049	0.00335208	0.00332628	0.00324432	0.00316465	0.00302636	0.00295504		SGP	Developing country	0.00902492	0.00467838	0.00539208	0.00481166	0.00468321	0.0046185	0.00462062	0.00453345	0.00455858	0.00446831	0.00438978	0.00434368	0.00426925		SGP	Developing country	0.00902492	0.00484666	0.00549307	0.00510617	0.00498815	0.00491823	0.00489865	0.0048846	0.00484247	0.00472131	0.00470309	0.00460959	0.00446039		SGP	Developing country
BRN	Developed income	0.00762629	0.00504282	0.00495565	0.00443777	0.00426989	0.00410364	0.00395966	0.00378785	0.00362292	0.00327929	0.0030054	0.00272051	0.00252081		BRN	Developed income	0.00762629	0.00595226	0.00688089	0.00605381	0.00577886	0.0055629	0.00539629	0.00512279	0.00496511	0.00451647	0.00416888	0.00390469	0.00364191		BRN	Developed income	0.00762629	0.00616637	0.00700975	0.00642435	0.00615513	0.00592391	0.005721	0.00551959	0.00527433	0.00477219	0.00446642	0.00414373	0.00380497		BRN	Developed income
PHL	Developing country	0.0622537	0.0439334	0.0403519	0.0345304	0.0313247	0.0280537	0.0250418	0.0220895	0.019473	0.0149668	0.0116051	0.00891214	0.00706607		PHL	Developing country	0.0622537	0.0518565	0.0560284	0.0471048	0.0423948	0.0380296	0.0341273	0.0298744	0.0266873	0.0206133	0.0160978	0.0127914	0.0102086		PHL	Developing country	0.0622537	0.0537218	0.0570777	0.049988	0.0451553	0.0404976	0.0361808	0.0321884	0.0283493	0.0217804	0.0172467	0.0135745	0.0106657		PHL	Developing country
TLS	Developing country	0.124216	0.214156	0.159378	0.10253	0.0731509	0.0537726	0.0410892	0.0319941	0.025532	0.0168009	0.0116644	0.00829213	0.00619984		TLS	Developing country	0.124216	0.252777	0.221295	0.139867	0.0990023	0.0728942	0.055997	0.0432696	0.0349909	0.0231394	0.0161801	0.0119015	0.00895713		TLS	Developing country	0.124216	0.26187	0.225439	0.148428	0.105449	0.0776247	0.0593665	0.0466212	0.0371701	0.0244495	0.0173349	0.0126301	0.00935816		TLS	Developing country
KOR	Developing country	0.0155367	0.00865815	0.00795339	0.00660936	0.00595609	0.0054016	0.00496058	0.00453702	0.00420216	0.00359667	0.00312046	0.00267608	0.00236381		KOR	Developing country	0.0155367	0.0102196	0.0110432	0.00901619	0.00806095	0.00732242	0.00676036	0.00613598	0.00575895	0.00495359	0.00432849	0.00384093	0.00341509		KOR	Developing country	0.0155367	0.0105872	0.0112501	0.00956805	0.00858582	0.00779761	0.00716714	0.00661127	0.0061176	0.00523406	0.00463742	0.00407606	0.00356799		KOR	Developing country
PNG	Developing country	0.131621	0.169566	0.131935	0.0866267	0.063107	0.0473487	0.0365689	0.0286506	0.0229135	0.0152141	0.0106411	0.00757006	0.00567198		PNG	Developing country	0.131621	0.200146	0.183191	0.118172	0.0854089	0.0641859	0.0498367	0.0387479	0.0314024	0.020954	0.0147606	0.0108652	0.00819452		PNG	Developing country	0.131621	0.207345	0.186622	0.125405	0.0909701	0.0683513	0.0528354	0.0417492	0.0333581	0.0221404	0.0158141	0.0115303	0.0085614		PNG	Developing country
SLB	Developing country	0.155451	0.175918	0.139645	0.0945043	0.0708998	0.0545359	0.0429909	0.0342316	0.0277121	0.0187184	0.0132108	0.00937562	0.00698986		SLB	Developing country	0.155451	0.207643	0.193896	0.128919	0.0959557	0.073929	0.0585888	0.0462957	0.0379786	0.0257803	0.0183252	0.0134567	0.0100985		SLB	Developing country	0.155451	0.215112	0.197527	0.136809	0.102204	0.0787267	0.0621141	0.0498817	0.0403438	0.02724	0.0196331	0.0142805	0.0105506		SLB	Developing country
NCL	Developing country	0.0133992	0.00692071	0.00682235	0.00627679	0.00622981	0.00617668	0.00616878	0.00612205	0.00608715	0.00591965	0.00575821	0.00544489	0.0051802		NCL	Developing country	0.0133992	0.00816881	0.00947281	0.00856252	0.00843141	0.00837312	0.00840691	0.00827963	0.00834228	0.00815296	0.00798739	0.00781496	0.00748403		NCL	Developing country	0.0133992	0.00846264	0.00965021	0.00908661	0.0089804	0.0089165	0.00891277	0.00892096	0.00886181	0.00861457	0.00855746	0.00829338	0.0078191		NCL	Developing country
VUT	Developing country	0.179886	0.161924	0.124837	0.0799308	0.057159	0.0424583	0.0326451	0.0254904	0.020327	0.0133837	0.00927549	0.00651749	0.00482348		VUT	Developing country	0.179886	0.191125	0.173336	0.109038	0.0773588	0.0575565	0.0444893	0.034474	0.0278576	0.018433	0.0128663	0.00935444	0.00696865		VUT	Developing country	0.179886	0.198	0.176582	0.115712	0.0823958	0.0612917	0.0471663	0.0371443	0.0295925	0.0194766	0.0137846	0.00992711	0.00728065		VUT	Developing country
FJI	Developing country	0.0602502	0.0416878	0.0394427	0.0340025	0.031077	0.0280005	0.0250923	0.0221213	0.0194226	0.0146815	0.0111988	0.00837733	0.0064311		FJI	Developing country	0.0602502	0.0492059	0.0547659	0.0463847	0.0420596	0.0379575	0.0341963	0.0299174	0.0266182	0.0202204	0.0155342	0.0120238	0.00929125		FJI	Developing country	0.0602502	0.0509759	0.0557916	0.0492238	0.0447981	0.0404208	0.0362539	0.0322348	0.0282759	0.0213653	0.0166429	0.0127599	0.00970723		FJI	Developing country
REU	Developing country	0.0451546	0.0211917	0.0286731	0.0212205	0.0214517	0.0220387	0.0227745	0.0231855	0.0221788	0.0221549	0.0226652	0.0232333	0.0238819		REU	Developing country	0.0451546	0.024693	0.0341548	0.0285569	0.027632	0.029044	0.0298406	0.0304518	0.0295726	0.0307481	0.0317745	0.0326636	0.0334191		REU	Developing country	0.0451546	0.0254393	0.0336758	0.0301493	0.0313461	0.030608	0.031602	0.0321752	0.0319888	0.0326012	0.0336929	0.0344819	0.0352448		REU	Developing country
LKA	Developing country	0.0302519	0.035544	0.0305238	0.0238979	0.0203693	0.0175655	0.0153361	0.0133434	0.0116643	0.00902162	0.00726512	0.00582458	0.00483723		LKA	Developing country	0.0302519	0.0419542	0.0423821	0.0326004	0.0275678	0.0238118	0.0209003	0.0180459	0.0159855	0.0124252	0.0100777	0.00835992	0.00698853		LKA	Developing country	0.0302519	0.0434633	0.0431759	0.0345958	0.0293628	0.0253571	0.0221579	0.0194437	0.0169811	0.0131287	0.0107969	0.0088717	0.00730141		LKA	Developing country
BGD	Developing country	0.0669479	0.0741997	0.0647911	0.0531004	0.0463504	0.0401632	0.0348629	0.0299443	0.025688	0.0187382	0.0138743	0.0102694	0.00789198		BGD	Developing country	0.0669479	0.0875811	0.0899621	0.0724372	0.0627305	0.0544453	0.0475118	0.0404974	0.0352047	0.0258076	0.0192454	0.0147395	0.0114018		BGD	Developing country	0.0669479	0.0907314	0.0916469	0.0768709	0.066815	0.0579786	0.0503706	0.0436343	0.0373971	0.0272688	0.020619	0.0156418	0.0119123		BGD	Developing country
BTN	Developing country	0.0632011	0.0393408	0.0288835	0.0194681	0.0148778	0.0118584	0.00982903	0.00829415	0.00712207	0.0053835	0.00428815	0.00347452	0.00294456		BTN	Developing country	0.0632011	0.0464356	0.0401046	0.0265575	0.0201356	0.0160753	0.0133952	0.0112172	0.00976061	0.00741453	0.00594823	0.00498692	0.00425412		BTN	Developing country	0.0632011	0.0481059	0.0408556	0.028183	0.0214467	0.0171185	0.0142012	0.0120861	0.0103685	0.00783434	0.00637276	0.00529221	0.00444458		BTN	Developing country
		0.0850577	0.0907518	0.0877758	0.0544418	0.0439318	0.0362681	0.0305071	0.0258016	0.0213187	0.0160023	0.0127844	0.0105491	0.00897862				0.0850577	0.107591	0.11113	0.0757646	0.0585633	0.0492297	0.0417645	0.0349921	0.0293064	0.0223431	0.0179137	0.0149924	0.0127524				0.0850577	0.110096	0.109762	0.0799192	0.0651212	0.0518405	0.0439221	0.0372116	0.0315094	0.0238021	0.0192009	0.0158977	0.0135225
[truncated: 13 more columns]

## Sheet: Global-level
Year	BaU	EAT	HUS	MED	VEG
2020	0.0318755	0.0318755	0.0318755	0.0318755	0.0318755
2025	0.0294176	0.0271349	0.0331467	0.0339999	0.0199154
2030	0.0256365	0.0227239	0.031162	0.031954	0.0122181
2035	0.0238162	0.0180388	0.0255416	0.0271544	0.0112705
2040	0.023098	0.0161949	0.0220924	0.024207	0.0101641
2045	0.021735	0.0148031	0.0203447	0.0216461	0.00942629
2050	0.0205311	0.0137006	0.0190584	0.0201607	0.00869546
2055	0.0193268	0.0126754	0.0174071	0.0186159	0.00798879
2060	0.0182203	0.0114723	0.015894	0.0170543	0.00726441
2070	0.0159969	0.00962351	0.0134022	0.0143453	0.00604332
2080	0.0141723	0.00810104	0.011309	0.0121263	0.00503411
2090	0.0123405	0.00678563	0.0095739	0.0101795	0.00432331
2100	0.0106861	0.00565831	0.00801634	0.00852567	0.0034837
