# Supplementary material for: Transitioning to healthy and sustainable diets has high environmental and affordability trade-offs for developing countries
Source: Research Square preprint supplement (doi:10.21203/rs.3.rs-3278140/v1), 2023-08-29
Supplement: Supplementary file 7 [file 96777d37ce6da4db1261e29e.xlsx]

## Sheet: Country-level
EAT	Income-group	y2020	y2025	y2030	y2035	y2040	y2045	y2050	y2055	y2060	y2070	y2080	y2090	y2100		HUS	y2020	y2025	y2030	y2035	y2040	y2045	y2050	y2055	y2060	y2070	y2080	y2090	y2100		MED	y2020	y2025	y2030	y2035	y2040	y2045	y2050	y2055	y2060	y2070	y2080	y2090	y2100		VEG	y2020	y2025	y2030
SEN	Developing country	0.143322	0.103331	0.123327	0.112295	0.101806	0.0859698	0.0725585	0.0482872	0.0381591	0.024262	0.0169904	0.012269	0.00912731		SEN	0.143322	0.135472	0.131117	0.127577	0.119313	0.105529	0.0855013	0.0640052	0.0520132	0.0346626	0.0240551	0.0173876	0.0128154		SEN	0.143322	0.107803	0.13366	0.130137	0.120603	0.109078	0.0911263	0.0692642	0.0548908	0.0366031	0.0258259	0.0183889	0.0136135		SEN	0.143322	0.0961677	0.0909068
GMB	Developing country	0.171694	0.150078	0.163235	0.133013	0.110634	0.0879933	0.0713734	0.046377	0.0362232	0.0229972	0.0163212	0.0120084	0.0091058		GMB	0.171694	0.19676	0.173911	0.151115	0.12966	0.108012	0.0841048	0.0614732	0.0493744	0.0328556	0.0231077	0.0170183	0.0127852		GMB	0.171694	0.156573	0.177283	0.154147	0.131062	0.111645	0.0896379	0.0665242	0.052106	0.034695	0.0248089	0.0179983	0.0135814		GMB	0.171694	0.139674	0.120576
MRT	Developing country	0.166441	0.0763941	0.0924475	0.0847706	0.0779046	0.0667743	0.0574328	0.0391727	0.0318753	0.0216188	0.0162158	0.0125343	0.00996442		MRT	0.166441	0.100157	0.0982584	0.0963072	0.0913016	0.081966	0.0676775	0.0519238	0.043448	0.0308862	0.0229585	0.0177637	0.0139908		MRT	0.166441	0.0797005	0.100163	0.0982394	0.0922891	0.0847229	0.0721299	0.0561901	0.0458517	0.0326154	0.0246486	0.0187866	0.0148621		MRT	0.166441	0.0710982	0.0681249
ESH	Developing country	0.0974556	0.0915255	0.0888914	0.0910094	0.0892717	0.0854643	0.0826022	0.0832752	0.0834733	0.0833362	0.0855824	0.0853434	0.0823607		ESH	0.0974556	0.0936106	0.100665	0.114277	0.129078	0.136518	0.138691	0.131313	0.131851	0.125052	0.124049	0.124603	0.122812		ESH	0.0974556	0.0938752	0.101653	0.116989	0.125049	0.130727	0.142341	0.136173	0.138447	0.130837	0.130182	0.130835	0.129235		ESH	0.0974556	0.0891035	0.0835876
GNB	Developing country	0.285398	0.244406	0.258425	0.200322	0.157344	0.117914	0.0903871	0.0557446	0.0414905	0.0241355	0.0159083	0.0109765	0.00789567		GNB	0.285398	0.320429	0.275514	0.227585	0.184401	0.144741	0.10651	0.0738901	0.0565541	0.0344819	0.0225231	0.0155559	0.0110861		GNB	0.285398	0.254984	0.280856	0.232151	0.186396	0.149609	0.113517	0.0799613	0.0596829	0.0364123	0.0241812	0.0164518	0.0117765		GNB	0.285398	0.227463	0.19102
GIN	Developing country	0.286112	0.205734	0.166353	0.110102	0.0800527	0.0583727	0.0447336	0.0280257	0.021422	0.0133937	0.00957632	0.00715907	0.00554213		GIN	0.286112	0.269728	0.178679	0.125086	0.0938191	0.071653	0.0527131	0.0371483	0.0291995	0.0191352	0.0135582	0.0101458	0.00778155		GIN	0.286112	0.214638	0.182144	0.127595	0.0948338	0.074063	0.056181	0.0402006	0.0308149	0.0202065	0.0145564	0.0107301	0.00826618		GIN	0.286112	0.191472	0.123883
SLE	Developing country	0.293532	0.258904	0.286433	0.234389	0.193351	0.151004	0.119561	0.0755693	0.0572445	0.0339924	0.0225726	0.0155964	0.0111962		SLE	0.293532	0.339436	0.305045	0.266287	0.226601	0.185358	0.140888	0.100168	0.0780278	0.0485641	0.0319585	0.0221031	0.0157203		SLE	0.293532	0.27011	0.310959	0.271629	0.229052	0.191593	0.150157	0.108398	0.0823447	0.0512829	0.0343112	0.023376	0.0166994		SLE	0.293532	0.240956	0.211495
MLI	Developing country	0.352644	0.185933	0.22326	0.202103	0.181359	0.150944	0.125171	0.0817657	0.0633599	0.0386876	0.026021	0.0181332	0.0130354		MLI	0.352644	0.243767	0.237332	0.229608	0.212547	0.185285	0.147499	0.108381	0.0863634	0.0552721	0.0368408	0.0256984	0.0183026		MLI	0.352644	0.19398	0.241934	0.234214	0.214846	0.191517	0.157203	0.117286	0.0911415	0.0583664	0.0395529	0.0271783	0.0194424		MLI	0.352644	0.173043	0.164548
LBR	Developing country	0.272113	0.353599	0.365874	0.286322	0.228655	0.173879	0.134686	0.0835118	0.0621471	0.0357601	0.0231881	0.0157342	0.0111		LBR	0.272113	0.463587	0.390276	0.325288	0.267976	0.213438	0.158711	0.110696	0.0847103	0.0510896	0.03283	0.0222984	0.0155852		LBR	0.272113	0.368903	0.397842	0.331814	0.270874	0.220616	0.169152	0.119791	0.0893969	0.0539498	0.0352468	0.0235825	0.0165559		LBR	0.272113	0.329087	0.270587
CIV	Developing country	0.172119	0.0911199	0.0930307	0.0728119	0.0590701	0.0463059	0.0375402	0.0245847	0.0194742	0.0128521	0.0095282	0.00733344	0.00583106		CIV	0.172119	0.119463	0.0992683	0.0827209	0.0692281	0.0568408	0.0442365	0.0325872	0.0265445	0.0183615	0.0134901	0.0103929	0.00818722		CIV	0.172119	0.0950635	0.101193	0.0843805	0.0699769	0.0587526	0.0471468	0.0352648	0.0280131	0.0193895	0.0144832	0.0109914	0.00869711		CIV	0.172119	0.0848031	0.0688251
BFA	Developing country	0.369815	0.179522	0.205674	0.177055	0.152282	0.122686	0.0995646	0.0641662	0.0493743	0.0299389	0.0201815	0.0142056	0.0103897		BFA	0.369815	0.235363	0.218864	0.20115	0.178469	0.150598	0.117325	0.085053	0.0673002	0.0427729	0.0285732	0.0201321	0.0145878		BFA	0.369815	0.187292	0.223107	0.205186	0.1804	0.155663	0.125043	0.0920414	0.0710236	0.0451675	0.0306766	0.0212915	0.0154963		BFA	0.369815	0.167077	0.151744
GHA	Developing country	0.212461	0.127503	0.140559	0.117266	0.0996599	0.0807294	0.0665946	0.0438141	0.0345109	0.0221008	0.0158095	0.0117336	0.00900822		GHA	0.212461	0.167163	0.149704	0.133225	0.116798	0.099096	0.0784736	0.0580761	0.0470404	0.0315748	0.0223832	0.0166289	0.0126482		GHA	0.212461	0.133022	0.152607	0.135898	0.118061	0.102429	0.0836362	0.0628479	0.0496429	0.0333425	0.024031	0.0175865	0.0134359		GHA	0.212461	0.118664	0.103794
TGO	Developing country	0.254607	0.221036	0.253868	0.224347	0.19663	0.160128	0.130358	0.0836476	0.0636227	0.0370689	0.0235668	0.0155328	0.0106461		TGO	0.254607	0.28979	0.270133	0.254878	0.230444	0.196559	0.153611	0.110876	0.0867217	0.0529595	0.0333661	0.022013	0.0149479		TGO	0.254607	0.230603	0.275371	0.259992	0.232937	0.20317	0.163717	0.119986	0.0915195	0.0559244	0.0358224	0.0232807	0.0158789		TGO	0.254607	0.205713	0.18729
NER	Developing country	0.475004	0.252962	0.307845	0.284272	0.259548	0.218331	0.18127	0.116787	0.0881758	0.0500717	0.0311289	0.0200948	0.0135343		NER	0.475004	0.331646	0.327156	0.32296	0.304182	0.268003	0.213605	0.154802	0.120189	0.0715362	0.0440726	0.0284783	0.0190032		NER	0.475004	0.26391	0.333499	0.329439	0.307472	0.277017	0.227658	0.167521	0.126838	0.0755411	0.047317	0.0301183	0.0201866		NER	0.475004	0.235425	0.226825
BEN	Developing country	0.155889	0.112719	0.137866	0.13121	0.123725	0.107783	0.0931514	0.0630148	0.050255	0.0318586	0.0218941	0.0153602	0.0110349		BEN	0.155889	0.14778	0.146498	0.149067	0.145002	0.132304	0.109767	0.0835267	0.0685007	0.0455156	0.0309979	0.0217684	0.0154937		BEN	0.155889	0.117597	0.149338	0.152057	0.14657	0.136754	0.116989	0.0903897	0.0722905	0.0480637	0.0332798	0.023022	0.0164587		BEN	0.155889	0.104905	0.101571
DZA	Developing country	0.0300407	0.0329732	0.0296155	0.0279997	0.0258312	0.0229712	0.02021	0.0182839	0.0162679	0.0126628	0.0103585	0.00838795	0.00665364		DZA	0.0300407	0.0337244	0.0334967	0.0351581	0.0373494	0.0366935	0.0339331	0.0288309	0.0256961	0.0190014	0.0150143	0.0122466	0.00992152		DZA	0.0300407	0.0338198	0.0338255	0.0359926	0.0361836	0.0351369	0.034826	0.0298982	0.0269817	0.0198805	0.0157566	0.0128591	0.0104405		DZA	0.0300407	0.0321007	0.0278141
NGA	Developing country	0.0877189	0.075296	0.0909457	0.08215	0.0745954	0.0634895	0.054273	0.0364704	0.0290555	0.0187238	0.013285	0.00977631	0.00745902		NGA	0.0877189	0.0987168	0.0966661	0.0933299	0.0874233	0.0779339	0.0639541	0.0483419	0.0396044	0.0267502	0.0188091	0.013855	0.010473		NGA	0.0877189	0.0785548	0.0985403	0.0952023	0.0883688	0.0805552	0.0681615	0.052314	0.0417955	0.0282478	0.0201937	0.0146528	0.0111252		NGA	0.0877189	0.0700762	0.0670209
CMR	Developing country	0.175809	0.111679	0.124546	0.105166	0.0899456	0.0730965	0.0604537	0.0399694	0.0316443	0.0204772	0.0147593	0.0109619	0.00837709		CMR	0.175809	0.146417	0.132615	0.119478	0.105413	0.0897265	0.0712372	0.0529798	0.0431332	0.0292554	0.0208964	0.0155351	0.011762		CMR	0.175809	0.116513	0.135186	0.121875	0.106553	0.0927444	0.0759238	0.0573329	0.0455195	0.0308932	0.0224347	0.0164298	0.0124946		CMR	0.175809	0.103937	0.0919449
GAB	Developing country	0.053816	0.02383	0.0292847	0.0273019	0.0256199	0.0227177	0.0204249	0.0146544	0.012573	0.0093818	0.0076187	0.00630311	0.00530697		GAB	0.053816	0.0312423	0.0311153	0.0310175	0.0300256	0.0278862	0.0240682	0.0194246	0.0171378	0.0134036	0.0107866	0.00893275	0.00745136		GAB	0.053816	0.0248614	0.0317186	0.0316398	0.0303504	0.0288242	0.0256516	0.0210206	0.018086	0.0141539	0.0115807	0.00944717	0.00791542		GAB	0.053816	0.022178	0.021573
GNQ	Developing country	0.0647144	0.0299502	0.0373729	0.0307458	0.026085	0.0215881	0.0185218	0.0128919	0.0108239	0.00793912	0.0064988	0.00546914	0.0046725		GNQ	0.0647144	0.0392662	0.0396965	0.03493	0.0305707	0.0264996	0.0218257	0.0170883	0.0147536	0.0113424	0.00920106	0.00775085	0.00656053		GNQ	0.0647144	0.0312464	0.0404661	0.0356308	0.0309014	0.0273909	0.0232615	0.0184924	0.0155699	0.0119774	0.00987841	0.00819721	0.00696911		GNQ	0.0647144	0.0278739	0.0275225
NAM	Developing country	0.0874488	0.0492191	0.0584462	0.0506733	0.0450656	0.0384168	0.0335688	0.0235855	0.019945	0.0146808	0.0118768	0.00981831	0.00824012		NAM	0.0874488	0.0645287	0.0621451	0.0575695	0.0528153	0.047157	0.0395568	0.0312629	0.0271863	0.0209741	0.0168153	0.0139145	0.0115697		NAM	0.0874488	0.0513493	0.06335	0.0587245	0.0533866	0.0487431	0.0421591	0.0338316	0.0286904	0.0221484	0.0180532	0.0147158	0.0122903		NAM	0.0874488	0.0458071	0.0430867
AGO	Developing country	0.0873153	0.0747191	0.105549	0.11674	0.122904	0.112768	0.0980256	0.0652518	0.0509187	0.0310932	0.0209591	0.0147693	0.0107831		AGO	0.0873153	0.0979605	0.111841	0.132627	0.144039	0.138424	0.115511	0.0864919	0.0694053	0.0444221	0.0296741	0.0209311	0.0151403		AGO	0.0873153	0.077953	0.11401	0.135288	0.145597	0.14308	0.12311	0.0935986	0.0732451	0.046909	0.0318586	0.0221364	0.0160832		AGO	0.0873153	0.0695393	0.0775422
COG	Developing country	0.0788299	0.107301	0.110271	0.0823094	0.0654829	0.0513255	0.0418559	0.0276631	0.0220985	0.0148071	0.0111202	0.00861331	0.00685242		COG	0.0788299	0.140677	0.117645	0.093511	0.0767438	0.0630025	0.049322	0.0366678	0.0301216	0.0211545	0.0157441	0.0122068	0.00962128		COG	0.0788299	0.111945	0.119926	0.0953871	0.0775738	0.0651215	0.0525668	0.0396806	0.031788	0.0223388	0.0169031	0.0129097	0.0102205		COG	0.0788299	0.0998624	0.081566
COD	Developing country	0.313303	0.425879	0.436476	0.335957	0.262714	0.195914	0.149731	0.0921189	0.068254	0.0391883	0.0254066	0.0174004	0.0124376		COD	0.313303	0.558348	0.465696	0.381678	0.307893	0.240487	0.17644	0.122104	0.0930344	0.0559874	0.0359709	0.0246599	0.0174633		COD	0.313303	0.444311	0.474726	0.389335	0.311223	0.248575	0.188047	0.132137	0.0981815	0.0591218	0.0386189	0.02608	0.0185509		COD	0.313303	0.396355	0.322878
LBY	Developing country	0.0326245	0.012295	0.0106871	0.010118	0.00932088	0.00850114	0.00787267	0.00754594	0.00711376	0.00617269	0.00553142	0.00480777	0.00403237		LBY	0.0326245	0.0125751	0.012081	0.0127048	0.0134771	0.0135795	0.0132184	0.0118988	0.0112366	0.00926257	0.0080176	0.00701945	0.00601284		LBY	0.0326245	0.0126106	0.0121996	0.0130063	0.0130564	0.0130034	0.0135662	0.0123393	0.0117988	0.0096911	0.008414	0.00737052	0.00632733		LBY	0.0326245	0.0119696	0.0100315
TCD	Developing country	0.206213	0.24226	0.276499	0.227299	0.186046	0.144139	0.113307	0.0712774	0.0537656	0.0316021	0.0208007	0.014349	0.0102689		TCD	0.206213	0.317615	0.294256	0.258232	0.218039	0.176932	0.133518	0.0944789	0.0732858	0.0451491	0.0294498	0.0203353	0.0144183		TCD	0.206213	0.252745	0.299961	0.263413	0.220398	0.182883	0.142302	0.102242	0.0773403	0.0476768	0.0316177	0.0215064	0.0153163		TCD	0.206213	0.225465	0.204015
CAF	Developing country	0.904339	0.484143	0.501637	0.384474	0.301161	0.226201	0.173961	0.107625	0.080107	0.0461168	0.0296358	0.0198315	0.0137554		CAF	0.904339	0.634736	0.535075	0.436798	0.352951	0.277663	0.204992	0.142659	0.109191	0.065886	0.0419587	0.0281051	0.0193136		CAF	0.904339	0.505096	0.545449	0.445561	0.356768	0.287002	0.218478	0.15438	0.115232	0.0695746	0.0450475	0.0297236	0.0205164		CAF	0.904339	0.45058	0.37098
ZAF	Developing country	0.0780795	0.0346382	0.0405639	0.0350118	0.0312497	0.0269865	0.0239977	0.01713	0.0146478	0.0109996	0.00905186	0.00762512	0.00652349		ZAF	0.0780795	0.0454124	0.0431442	0.0397766	0.0366236	0.0331261	0.0282784	0.022706	0.0199659	0.0157149	0.0128157	0.0108063	0.00915944		ZAF	0.0780795	0.0361373	0.0439807	0.0405746	0.0370197	0.0342403	0.0301388	0.0245717	0.0210705	0.0165946	0.0137592	0.0114286	0.00972988		ZAF	0.0780795	0.032237	0.0299129
BWA	Developing country	0.0455661	0.0219385	0.0265375	0.0245906	0.0232024	0.0209024	0.019208	0.0141086	0.0123871	0.00970188	0.00827054	0.00715177	0.00626288		BWA	0.0455661	0.0287624	0.0282058	0.0279371	0.0271924	0.0256579	0.0226343	0.0187011	0.0168843	0.0138608	0.0117095	0.0101355	0.00879353		BWA	0.0455661	0.022888	0.0287526	0.0284976	0.0274865	0.0265209	0.0241234	0.0202377	0.0178184	0.0146368	0.0125715	0.0107192	0.00934117		BWA	0.0455661	0.0204176	0.0195557
ZMB	Developing country	0.105733	0.126608	0.148965	0.127105	0.109083	0.0881373	0.0720537	0.0469202	0.0365293	0.0227362	0.0157304	0.0113589	0.00850591		ZMB	0.105733	0.165989	0.158424	0.144402	0.127842	0.108189	0.0849065	0.0621932	0.0497916	0.0324827	0.0222713	0.0160978	0.0119429		ZMB	0.105733	0.132087	0.161496	0.1473	0.129225	0.111828	0.0904923	0.0673034	0.0525463	0.0343013	0.0239108	0.0170248	0.0126867		ZMB	0.105733	0.117831	0.109839
SDN	Developing country	0.102778	0.0892324	0.0744981	0.0658732	0.0551017	0.0443199	0.035636	0.0296983	0.0244806	0.0164517	0.0115463	0.00806486	0.00561994		SDN	0.102778	0.0912653	0.0841563	0.0827142	0.0796719	0.0707951	0.0598337	0.0468298	0.0386686	0.024687	0.0167359	0.0117749	0.00838013		SDN	0.102778	0.0915233	0.0849822	0.0846776	0.077185	0.0677918	0.0614082	0.0485633	0.0406031	0.0258291	0.0175633	0.0123638	0.00881844		SDN	0.102778	0.0868711	0.0698793
ZWE	Developing country	0.391111	0.27665	0.334018	0.296143	0.255417	0.20196	0.158896	0.0987447	0.0732474	0.0415596	0.0264788	0.0177787	0.0125171		ZWE	0.391111	0.362702	0.355031	0.336446	0.29934	0.247907	0.18724	0.130887	0.0998407	0.0593753	0.0374888	0.0251959	0.0175749		ZWE	0.391111	0.288623	0.361914	0.343196	0.302577	0.256246	0.199558	0.141642	0.105364	0.0626993	0.0402486	0.0266469	0.0186695		ZWE	0.391111	0.257471	0.246151
LSO	Developing country	0.1965	0.18122	0.200002	0.160357	0.129571	0.0997601	0.0785425	0.0496518	0.0377648	0.0226431	0.0151737	0.0106367	0.00775378		LSO	0.1965	0.237588	0.21301	0.18218	0.151852	0.122456	0.0925527	0.065814	0.0514758	0.0323497	0.021483	0.0150743	0.0108869		LSO	0.1965	0.189063	0.21714	0.185835	0.153495	0.126575	0.0986416	0.0712216	0.0543237	0.0341608	0.0230645	0.0159424	0.0115649		LSO	0.1965	0.168657	0.147685
BDI	Developing country	0.383768	0.639751	0.61819	0.436638	0.321104	0.230993	0.172706	0.104469	0.0761204	0.042279	0.0268111	0.0179742	0.0125388		BDI	0.383768	0.838746	0.660577	0.496061	0.376323	0.283546	0.203512	0.138475	0.103757	0.0604031	0.0379594	0.0254731	0.0176054		BDI	0.383768	0.66744	0.673385	0.506013	0.380393	0.293083	0.216901	0.149853	0.109497	0.0637847	0.0407539	0.02694	0.0187018		BDI	0.383768	0.595402	0.457994
RWA	Developing country	0.241933	0.163943	0.184023	0.159016	0.139064	0.115032	0.0962433	0.0637644	0.0501775	0.0318333	0.0224337	0.0162618	0.0120816		RWA	0.241933	0.214938	0.195916	0.180656	0.162979	0.141203	0.113411	0.0845203	0.068395	0.0454795	0.0317618	0.0230462	0.0169634		RWA	0.241933	0.171039	0.199714	0.184281	0.164741	0.145952	0.120872	0.091465	0.0721789	0.0480256	0.0341	0.0243734	0.0180199		RWA	0.241933	0.152578	0.135833
TZA	Developing country	0.181767	0.130107	0.148569	0.129609	0.114216	0.0948065	0.0794571	0.052846	0.0418996	0.0269439	0.0191227	0.0139905	0.0104652		TZA	0.181767	0.170577	0.158108	0.147248	0.133857	0.116376	0.0936304	0.0700479	0.0571117	0.0384941	0.0270741	0.0198273	0.0146939		TZA	0.181767	0.135738	0.161173	0.150202	0.135305	0.12029	0.0997902	0.0758035	0.0602714	0.0406492	0.0290672	0.0209691	0.015609		TZA	0.181767	0.121088	0.10962
UGA	Developing country	0.342168	0.22087	0.23807	0.194649	0.160838	0.126078	0.100352	0.0637283	0.0484902	0.0289729	0.0193176	0.0134277	0.00968174		UGA	0.342168	0.289572	0.253695	0.221139	0.188496	0.154762	0.118252	0.0844724	0.0660951	0.0413929	0.02735	0.0190297	0.0135939		UGA	0.342168	0.230429	0.258613	0.225576	0.190535	0.159967	0.126032	0.0914132	0.0697518	0.0437103	0.0293634	0.0201256	0.0144405		UGA	0.342168	0.205558	0.175893
MOZ	Developing country	0.273947	0.297975	0.28839	0.228196	0.183792	0.140631	0.10942	0.0681681	0.0510412	0.0296504	0.0191834	0.0128708	0.00894247		MOZ	0.273947	0.390661	0.308151	0.259252	0.215398	0.172625	0.128938	0.0903575	0.0695723	0.0423609	0.0271601	0.0182404	0.0125559		MOZ	0.273947	0.310872	0.314125	0.264453	0.217727	0.178431	0.137421	0.0977818	0.0734213	0.0447324	0.0291595	0.0192908	0.0133378		MOZ	0.273947	0.277319	0.213648
SWZ	Developing country	0.0700257	0.0426621	0.0544221	0.0526731	0.050808	0.0456091	0.0410061	0.0291436	0.0245517	0.0174105	0.0133148	0.0103732	0.00820782		SWZ	0.0700257	0.0559321	0.0577796	0.0598415	0.0595453	0.0559855	0.0483207	0.0386301	0.0334655	0.024874	0.0188512	0.0147009	0.0115244		SWZ	0.0700257	0.0445085	0.0588998	0.0610421	0.0601893	0.0578686	0.0514996	0.0418041	0.035317	0.0262666	0.0202389	0.0155475	0.0122421		SWZ	0.0700257	0.0397046	0.0400599
MWI	Developing country	0.30181	0.323739	0.357585	0.296382	0.246779	0.193285	0.152657	0.0956339	0.0715057	0.0408588	0.0259142	0.0171623	0.0118801		MWI	0.30181	0.424438	0.380835	0.336717	0.289216	0.237259	0.179887	0.126764	0.0974666	0.058374	0.0366896	0.0243224	0.0166805		MWI	0.30181	0.33775	0.388219	0.343472	0.292344	0.245239	0.191722	0.137179	0.102859	0.061642	0.0393905	0.0257231	0.0177193		MWI	0.30181	0.301296	0.264042
ETH	Developing country	0.265142	0.205431	0.235898	0.197033	0.164124	0.12873	0.102393	0.0651337	0.0496949	0.0297261	0.0196992	0.0136246	0.00976147		ETH	0.265142	0.269331	0.251013	0.223847	0.192347	0.158017	0.120657	0.0863354	0.0677372	0.042469	0.0278903	0.0193087	0.0137058		ETH	0.265142	0.214323	0.25588	0.228338	0.194428	0.163332	0.128595	0.0934292	0.0714847	0.0448466	0.0299435	0.0204207	0.0145594		ETH	0.265142	0.19119	0.174033
EGY	Developing country	0.0436901	0.0327494	0.0270461	0.0237488	0.0201364	0.016798	0.0142651	0.012692	0.0112694	0.00898511	0.00754321	0.00625607	0.00510222		EGY	0.0436901	0.0334955	0.0305465	0.0298204	0.0291153	0.0268327	0.0239515	0.0200134	0.0178006	0.0134828	0.0109336	0.00913401	0.00760814		EGY	0.0436901	0.0335901	0.0308463	0.0305282	0.0282064	0.0256944	0.0245818	0.0207542	0.0186912	0.0141066	0.0114742	0.00959083	0.00800607		EGY	0.0436901	0.0318828	0.0253644
KEN	Developing country	0.226387	0.128249	0.149208	0.13305	0.118826	0.0995395	0.0838776	0.0559135	0.0443396	0.0284665	0.0202095	0.0147682	0.0110993		KEN	0.226387	0.168141	0.158722	0.151156	0.13926	0.122186	0.0988394	0.0741139	0.0604377	0.0406695	0.0286128	0.0209294	0.0155843		KEN	0.226387	0.1338	0.1618	0.154189	0.140767	0.126295	0.105342	0.0802035	0.0637813	0.0429463	0.0307192	0.0221347	0.0165548		KEN	0.226387	0.119359	0.110046
ERI	Developing country	0.200269	0.143345	0.189915	0.201538	0.215415	0.212675	0.206195	0.153726	0.132005	0.0905092	0.0623118	0.041619	0.0279021		ERI	0.200269	0.187932	0.20148	0.228965	0.25246	0.261061	0.242976	0.203765	0.179932	0.129308	0.0882216	0.0589823	0.0391765		ERI	0.200269	0.149549	0.205386	0.233559	0.25519	0.269841	0.258961	0.220507	0.189886	0.136547	0.0947162	0.0623789	0.0416164		ERI	0.200269	0.133408	0.139691
SOM	Developing country	0.131829	0.0698427	0.095171	0.105899	0.12137	0.131576	0.144109	0.125012	0.128281	0.131234	0.132845	0.121207	0.100964		SOM	0.131829	0.0915673	0.100912	0.12031	0.142242	0.161511	0.169814	0.165704	0.174855	0.187492	0.188083	0.171774	0.14176		SOM	0.131829	0.0728655	0.102868	0.122724	0.143781	0.166943	0.180986	0.17932	0.184529	0.197988	0.201929	0.181666	0.150589		SOM	0.131829	0.065001	0.0699646
DJI	Developing country	0.102335	0.0432273	0.0516971	0.0489825	0.0466154	0.0415887	0.0373338	0.0265646	0.0224668	0.0161968	0.0127019	0.0101438	0.00823061		DJI	0.102335	0.0566732	0.0549604	0.0556486	0.0546316	0.0510505	0.0439933	0.0352117	0.0306236	0.02314	0.0179834	0.0143758	0.0115564		DJI	0.102335	0.0450982	0.056026	0.0567651	0.0552225	0.0527676	0.0468876	0.0381049	0.0323178	0.0244354	0.0193073	0.0152037	0.0122761		DJI	0.102335	0.0402307	0.0381054
MDG	Developing country	0.251085	0.226505	0.266134	0.235158	0.205867	0.167143	0.135543	0.0870058	0.0665651	0.0398507	0.0264408	0.0181664	0.0129		MDG	0.251085	0.296959	0.283042	0.267161	0.241269	0.205169	0.15972	0.115327	0.0907324	0.0569337	0.0374351	0.0257453	0.0181125		MDG	0.251085	0.236308	0.28853	0.272521	0.243879	0.21207	0.170228	0.124803	0.0957521	0.0601211	0.0401909	0.0272279	0.0192405		MDG	0.251085	0.210803	0.19624
MUS	Developing country	0.0372298	0.0170557	0.0204394	0.0191896	0.0183807	0.0167331	0.0154171	0.011357	0.00999967	0.00782896	0.00655554	0.00553879	0.00472122		MUS	0.0372298	0.0223609	0.0217287	0.0218011	0.0215415	0.0205401	0.0181671	0.0150538	0.0136302	0.011185	0.00928139	0.00784957	0.00662894		MUS	0.0372298	0.0177939	0.02215	0.0222385	0.0217745	0.0212309	0.0193623	0.0162907	0.0143842	0.0118112	0.00996465	0.0083016	0.00704178		MUS	0.0372298	0.0158734	0.015065
ATF	Developing country	0.0322657	0.0184479	0.0188557	0.019248	0.0189726	0.0192449	0.0180862	0.0177	0.0174727	0.0173733	0.017244	0.0168681	0.0161002		ATF	0.0322657	0.0191305	0.0202715	0.0216502	0.0229621	0.0244984	0.0254482	0.0244267	0.0245038	0.0241555	0.0240554	0.0240743	0.0232747		ATF	0.0322657	0.0192043	0.0205534	0.0222853	0.0239242	0.0250831	0.0263528	0.0256923	0.0258268	0.0256474	0.0255156	0.0255255	0.0250827		ATF	0.0322657	0.0179654	0.0175313
CHN	Developing country	0.0369089	0.0349648	0.0229051	0.0157899	0.0112051	0.00852099	0.00655547	0.00603404	0.00555021	0.00464175	0.00408779	0.00364023	0.00326513		CHN	0.0369089	0.0353435	0.0233514	0.0174512	0.0134657	0.0104002	0.00867263	0.00787493	0.00703061	0.00587515	0.00505593	0.00453189	0.0040561		CHN	0.0369089	0.0354718	0.0236861	0.0180638	0.0139174	0.0113349	0.00960674	0.00876609	0.00768609	0.00657421	0.00572458	0.00512913	0.00457304		CHN	0.0369089	0.0345456	0.0215383
IND	Developing country	0.0449522	0.040576	0.0352207	0.0324846	0.02761	0.0240105	0.020436	0.0178646	0.0156397	0.0122936	0.00998034	0.00825802	0.00675476		IND	0.0449522	0.0409461	0.0391753	0.0390133	0.0350987	0.0329587	0.0285194	0.0248365	0.0221764	0.0175423	0.0142469	0.0116741	0.0100026		IND	0.0449522	0.0411228	0.0398241	0.0403633	0.0367085	0.0335302	0.0306178	0.0264643	0.0236046	0.0186629	0.0150741	0.0124538	0.0104831		IND	0.0449522	0.0393572	0.0325855
NPL	Developing country	0.096083	0.113976	0.102944	0.0959019	0.084841	0.075726	0.0615724	0.0515029	0.0430551	0.0302148	0.0210841	0.0147567	0.0103276		NPL	0.096083	0.118193	0.110852	0.107871	0.102681	0.0963978	0.0866353	0.0710761	0.0603806	0.04201	0.0294125	0.0210608	0.0149297		NPL	0.096083	0.118649	0.112393	0.111035	0.106984	0.0986984	0.089715	0.0747585	0.0636409	0.0446046	0.0311978	0.0223304	0.0160895		NPL	0.096083	0.110995	0.0958678
MNG	Developing country	0.0694619	0.0281865	0.0230848	0.0191961	0.0157985	0.0137391	0.0113151	0.00983649	0.00865463	0.00696595	0.0058818	0.00500102	0.00419372		MNG	0.0694619	0.0292293	0.0248933	0.0215919	0.0191206	0.0174896	0.0159209	0.0135747	0.0121373	0.0096853	0.00820514	0.0071375	0.00606251		MNG	0.0694619	0.0293422	0.0252394	0.0222252	0.0199218	0.017907	0.0164869	0.014278	0.0127926	0.0102835	0.0087032	0.00756774	0.00653346		MNG	0.0694619	0.0274492	0.0215284
MMR	Developing country	0.103106	0.101033	0.0895791	0.0812695	0.0715637	0.06487	0.0546049	0.0479336	0.0424541	0.0339858	0.0271833	0.0215403	0.0167828		MMR	0.103106	0.104771	0.0964851	0.0914125	0.0866122	0.0825782	0.0768316	0.0661502	0.0595377	0.0472531	0.0379208	0.0307425	0.0242615		MMR	0.103106	0.105175	0.0978265	0.0940939	0.090241	0.084549	0.0795628	0.0695774	0.0627524	0.0501716	0.0402226	0.0325956	0.0261462		MMR	0.103106	0.0983899	0.0834427
LAO	Developing country	0.0743348	0.0567897	0.0479623	0.0418898	0.0353316	0.0307692	0.0249769	0.0212641	0.0183472	0.0139307	0.0106499	0.00821139	0.00625941		LAO	0.0743348	0.0588908	0.0516961	0.0471179	0.0427612	0.0391686	0.0351436	0.0293453	0.0257302	0.0193689	0.0148566	0.0117194	0.00904869		LAO	0.0743348	0.0591182	0.0524148	0.0485	0.0445528	0.0401034	0.0363929	0.0308657	0.0271195	0.0205652	0.0157584	0.0124258	0.00975162		LAO	0.0743348	0.0553042	0.0447081
THA	Developing country	0.0296532	0.0220429	0.0190169	0.0167794	0.0143857	0.0127744	0.0105832	0.00918733	0.00809732	0.00653573	0.00537099	0.00444721	0.00365774		THA	0.0296532	0.0228584	0.020491	0.0188736	0.0174107	0.0162615	0.0148911	0.0126789	0.0113557	0.00908713	0.00749256	0.0063471	0.00528768		THA	0.0296532	0.0229467	0.0207758	0.0194272	0.0181402	0.0166496	0.0154204	0.0133358	0.0119689	0.00964837	0.00794735	0.00672969	0.00569844		THA	0.0296532	0.0214663	0.0177211
KHM	Developing country	0.0999299	0.0879877	0.0711219	0.059576	0.0483226	0.0405342	0.0318857	0.0262329	0.0219323	0.0157456	0.0115299	0.00850633	0.00623225		KHM	0.0999299	0.091243	0.0767094	0.0670115	0.0584839	0.0515993	0.0448646	0.0362025	0.0307579	0.0218923	0.0160843	0.0121403	0.00900943		KHM	0.0999299	0.0915953	0.0777759	0.0689771	0.0609343	0.0528308	0.0464595	0.0380781	0.0324187	0.0232445	0.0170606	0.0128721	0.00970931		KHM	0.0999299	0.0856861	0.0663402
VNM	Developing country	0.0815066	0.0463174	0.0390506	0.0347039	0.029775	0.0263212	0.0216748	0.0186861	0.0162842	0.0125989	0.00998125	0.00793896	0.00625828		VNM	0.0815066	0.048031	0.0420918	0.0390352	0.0360361	0.0335064	0.0304974	0.0257876	0.022837	0.0175173	0.0139239	0.0113305	0.00904707		VNM	0.0815066	0.0482164	0.042677	0.0401802	0.0375459	0.034306	0.0315815	0.0271236	0.02407	0.0185992	0.0147691	0.0120135	0.00974986		VNM	0.0815066	0.0451058	0.036402
RUS	Developing country	0.0372757	0.0303429	0.0229572	0.0176933	0.0125225	0.00899154	0.00703828	0.00650768	0.0059184	0.00497924	0.0044934	0.0039623	0.0033738		RUS	0.0372757	0.0311315	0.0255966	0.0208652	0.0162585	0.0132243	0.0116086	0.0109721	0.010056	0.00848479	0.00714867	0.00641282	0.00500598		RUS	0.0372757	0.0312464	0.0259179	0.0214341	0.0166495	0.0138157	0.0121194	0.0114915	0.0108065	0.00908801	0.00725725	0.00634912	0.00553201		RUS	0.0372757	0.0295906	0.0228543
PRK	Developing country	0.120012	0.194143	0.198969	0.210829	0.217816	0.231695	0.228416	0.234483	0.242787	0.26586	0.290975	0.312711	0.327194		PRK	0.120012	0.201326	0.213902	0.237142	0.263619	0.294944	0.321392	0.323595	0.340486	0.369645	0.405911	0.446303	0.472996		PRK	0.120012	0.202103	0.216876	0.244098	0.274664	0.301983	0.332817	0.34036	0.35887	0.392475	0.43055	0.473206	0.50974		PRK	0.120012	0.189065	0.184988
GRL	Developed income	0.00919469	0.00628061	0.00573909	0.00534862	0.00435443	0.00390387	0.00346075	0.00363163	0.00367544	0.00415721	0.00452743	0.00430687	0.00408389		GRL	0.00919469	0.00645093	0.00636204	0.00634465	0.0060935	0.00603916	0.00563742	0.00608107	0.00638463	0.00660112	0.00697989	0.00709139	0.00684609		GRL	0.00919469	0.00648444	0.00646729	0.00654412	0.00643988	0.0063147	0.00586129	0.00657446	0.00683762	0.00726537	0.00761976	0.00759753	0.00690764		GRL	0.00919469	0.00614671	0.00551704
ISL	Developing country	0.0182931	0.00955543	0.00803761	0.00685382	0.00510003	0.00418799	0.00341863	0.00330987	0.00309213	0.00295716	0.00274566	0.00224048	0.00181187		ISL	0.0182931	0.00981457	0.00888312	0.00813016	0.00713686	0.00647869	0.00556879	0.00554229	0.00537136	0.00469558	0.00423295	0.00368902	0.00303736		ISL	0.0182931	0.00986555	0.00903007	0.00838576	0.00754255	0.00677428	0.00578995	0.00599196	0.00575245	0.00516808	0.004621	0.00395232	0.00306467		ISL	0.0182931	0.00935172	0.00770327
ESP	Developed income	0.020485	0.0190605	0.0158104	0.0131604	0.0102199	0.00735818	0.00590405	0.00554396	0.00535891	0.00488028	0.00444414	0.0038644	0.00319859		ESP	0.020485	0.0193143	0.0172765	0.0151707	0.0129899	0.0112583	0.00958191	0.00947922	0.00887744	0.00771542	0.0066855	0.00579722	0.00486344		ESP	0.020485	0.0193764	0.0174708	0.0156099	0.0135556	0.011813	0.0100872	0.00992161	0.0095392	0.00838853	0.00729035	0.00631439	0.0053704		ESP	0.020485	0.0187879	0.0154317
IRL	Developing country	0.0112425	0.00764034	0.00635118	0.00547968	0.00442994	0.0033241	0.00279512	0.00276856	0.00283399	0.00288334	0.00289594	0.0027583	0.00247674		IRL	0.0112425	0.00774208	0.00694097	0.00631672	0.00563059	0.00508599	0.00453631	0.00473376	0.00469471	0.00455839	0.00435647	0.00413789	0.00376587		IRL	0.0112425	0.00776696	0.00701904	0.00649959	0.00587583	0.00533657	0.00477551	0.00495469	0.00504468	0.00495607	0.00475061	0.00450703	0.00415842		IRL	0.0112425	0.00753108	0.0061998
PRT	Developing country	0.0311913	0.0211468	0.0170927	0.013965	0.010651	0.00750282	0.0059017	0.00546375	0.0052414	0.00473932	0.00425079	0.00367299	0.00305637		PRT	0.0311913	0.0214284	0.0186498	0.0160982	0.0135377	0.0114796	0.0095781	0.00934208	0.00868278	0.00749258	0.00639463	0.00551007	0.0046472		PRT	0.0311913	0.0214973	0.0188595	0.0165643	0.0141274	0.0120452	0.0100832	0.00977807	0.00933004	0.00814625	0.00697317	0.00600162	0.00513162		PRT	0.0311913	0.0208444	0.0166583
GBR	Developed income	0.0173376	0.0160495	0.0131129	0.0106503	0.00802107	0.00559574	0.0044109	0.00413414	0.00401937	0.00370702	0.00341044	0.0030245	0.00256361		GBR	0.0173376	0.0162632	0.0143163	0.0122772	0.010195	0.00856169	0.00715862	0.00706867	0.00665839	0.00586058	0.00513046	0.00453723	0.00389796		GBR	0.0173376	0.0163154	0.0144774	0.0126326	0.0106391	0.00898351	0.0075361	0.00739857	0.00715474	0.00637186	0.00559462	0.00494199	0.00430428		GBR	0.0173376	0.01582	0.0127876
FRA	Developed income	0.01947	0.0167975	0.0137721	0.0112125	0.00848041	0.00594398	0.00469703	0.00440529	0.00429424	0.00402423	0.00375223	0.00335084	0.00285384		FRA	0.01947	0.0170212	0.0150391	0.0129253	0.0107789	0.00909451	0.007623	0.00753229	0.00711373	0.00636206	0.00564462	0.00502679	0.00433925		FRA	0.01947	0.0170759	0.0152083	0.0132995	0.0112483	0.00954258	0.00802496	0.00788383	0.00764402	0.0069171	0.0061553	0.00547523	0.00479157		FRA	0.01947	0.0165573	0.0134332
BEL	Developed income	0.0188492	0.0152911	0.0124374	0.00995838	0.00742512	0.00515447	0.0040408	0.00376218	0.0036462	0.00338338	0.00313628	0.00279809	0.00238547		BEL	0.0188492	0.0154947	0.0135754	0.0114795	0.00943757	0.00788653	0.00655797	0.00643269	0.0060402	0.00534892	0.00471802	0.00419759	0.00362709		BEL	0.0188492	0.0155445	0.0137281	0.0118119	0.00984862	0.00827508	0.00690378	0.0067329	0.00649046	0.00581557	0.00514487	0.00457205	0.00400518		BEL	0.0188492	0.0150725	0.0121258
NLD	Developing country	0.0140145	0.0128474	0.0105727	0.00870703	0.00662669	0.00464682	0.00366403	0.00343555	0.0033576	0.00316816	0.00295708	0.00264733	0.00227135		NLD	0.0140145	0.0130185	0.0115478	0.010037	0.00842274	0.00710981	0.0059465	0.00587421	0.00556212	0.00500867	0.00444845	0.00397142	0.00345357		NLD	0.0140145	0.0130603	0.0116777	0.0103276	0.00878959	0.0074601	0.00626007	0.00614836	0.00597674	0.00544563	0.00485091	0.00432571	0.00381357		NLD	0.0140145	0.0126637	0.0103147
NOR	Developing country	0.0136847	0.00790253	0.00700995	0.00627076	0.0049014	0.00421216	0.00354473	0.00350191	0.00332252	0.0032508	0.00304508	0.00249592	0.00203605		NOR	0.0136847	0.00811684	0.00776265	0.00743852	0.00685891	0.00651607	0.00577421	0.00586386	0.00577157	0.00516186	0.00469456	0.0041096	0.00341316		NOR	0.0136847	0.008159	0.00789107	0.00767238	0.0072488	0.00681337	0.00600351	0.00633962	0.00618106	0.00568128	0.00512493	0.00440291	0.00344384		NOR	0.0136847	0.00773406	0.00673162
LUX	Developing country	0.0108867	0.00754724	0.00637239	0.00542244	0.00429361	0.00315946	0.00261306	0.00255529	0.00259573	0.00262379	0.00256594	0.00238145	0.00210073		LUX	0.0108867	0.00764773	0.00697027	0.00625073	0.00545731	0.00483408	0.00424084	0.0043691	0.00430002	0.00414806	0.00386005	0.00357256	0.00319415		LUX	0.0108867	0.00767231	0.00704867	0.00643169	0.00569501	0.00507225	0.00446446	0.00457301	0.00462056	0.00450994	0.00420927	0.00389127	0.0035271		LUX	0.0108867	0.00743931	0.00622597
DEU	Developed income	0.0174937	0.014306	0.0118749	0.00980797	0.00742936	0.00521293	0.00412294	0.00386808	0.00376057	0.00349352	0.00322028	0.00286141	0.00243456		DEU	0.0174937	0.0144964	0.0129766	0.0113062	0.00944295	0.00797598	0.00669128	0.00661375	0.00622967	0.00552305	0.0048444	0.00429257	0.00370174		DEU	0.0174937	0.014543	0.0131225	0.0116335	0.00985425	0.00836894	0.00704411	0.00692241	0.00669406	0.00600489	0.00528268	0.00467551	0.00408761		DEU	0.0174937	0.0141014	0.0115909
CHE	Developed income	0.0130776	0.00860726	0.0075003	0.00658613	0.00499603	0.00414577	0.003396	0.00329076	0.00307264	0.00294625	0.00273526	0.00222939	0.00180986		CHE	0.0130776	0.00884068	0.00830025	0.00781262	0.00699134	0.00641338	0.00553194	0.00551029	0.00533751	0.00467827	0.00421692	0.00367075	0.00303398		CHE	0.0130776	0.0088866	0.00843757	0.00805824	0.00738876	0.00670599	0.00575163	0.00595736	0.0057162	0.00514903	0.0046035	0.00393275	0.00306126		CHE	0.0130776	0.00842377	0.00719782
ITA	Developing country	0.0208509	0.0193879	0.015958	0.0130768	0.00994943	0.00698162	0.00547653	0.00506802	0.00486329	0.00441376	0.00400071	0.00348441	0.00290834		ITA	0.0208509	0.0196461	0.01743	0.0150743	0.012646	0.0106821	0.00888807	0.00866545	0.00805641	0.00697788	0.00601842	0.00522718	0.00442212		ITA	0.0208509	0.0197092	0.017626	0.0155107	0.0131968	0.0112084	0.00935675	0.00906986	0.00865698	0.00758664	0.00656292	0.00569349	0.00488307		ITA	0.0208509	0.0191106	0.0155688
DNK	Developed income	0.0208096	0.0143007	0.0118948	0.00995112	0.00766184	0.0054122	0.00427536	0.00401099	0.00391924	0.00366431	0.0033671	0.00296687	0.00251014		DNK	0.0208096	0.0144911	0.0129998	0.0114712	0.00973843	0.00828087	0.00693864	0.0068581	0.00649252	0.00579305	0.00506526	0.00445078	0.00381665		DNK	0.0208096	0.0145376	0.013146	0.0118033	0.0101626	0.00868885	0.00730452	0.00717817	0.00697651	0.00629845	0.00552352	0.00484783	0.00421449		DNK	0.0208096	0.0140961	0.0116116
AUT	Developed income	0.0190139	0.0142257	0.0116608	0.00948553	0.00713377	0.00497061	0.00391174	0.00365484	0.00355123	0.00328118	0.00301175	0.0026697	0.00226345		AUT	0.0190139	0.0144151	0.0127334	0.0109345	0.00906725	0.00760521	0.00634852	0.00624914	0.00588288	0.00518735	0.00453069	0.00400497	0.00344157		AUT	0.0190139	0.0144614	0.0128766	0.011251	0.00946218	0.00797991	0.00668329	0.00654079	0.00632142	0.0056399	0.00494059	0.00436225	0.00380032		AUT	0.0190139	0.0140223	0.0113737
SWE	Developing country	0.0139538	0.0142431	0.0116609	0.00950159	0.00718932	0.00504753	0.00400594	0.00379636	0.0037378	0.00349322	0.00324957	0.00291671	0.00248638		SWE	0.0139538	0.0144328	0.0127327	0.010953	0.00913785	0.00772291	0.00650139	0.00649113	0.00619195	0.00552257	0.00488846	0.00437553	0.00378053		SWE	0.0139538	0.0144791	0.0128759	0.0112701	0.00953586	0.0081034	0.00684421	0.00679407	0.00665353	0.00600437	0.00533072	0.00476587	0.00417461		SWE	0.0139538	0.0140394	0.0113731
CZE	Developed income	0.020265	0.0177129	0.0135662	0.0103062	0.00742937	0.00507094	0.00390958	0.00359454	0.00343698	0.00304709	0.00273123	0.00239165	0.00201234		CZE	0.020265	0.0179487	0.014754	0.0118805	0.00944296	0.00775872	0.00634501	0.00614605	0.00569362	0.00481726	0.00410869	0.00358786	0.00305975		CZE	0.020265	0.0180064	0.01492	0.0122245	0.00985425	0.00814098	0.00667959	0.00643289	0.00611805	0.00523753	0.00448041	0.00390793	0.00337869		CZE	0.020265	0.0174596	0.0131786
HRV	Developing country	0.0286068	0.0267794	0.0213678	0.0172763	0.0130869	0.00925117	0.00738299	0.00698131	0.00685934	0.00648345	0.00608485	0.00549545	0.00474928		HRV	0.0286068	0.027136	0.0232966	0.0199153	0.0166339	0.0141546	0.0119821	0.0119368	0.011363	0.0102499	0.00915369	0.00824405	0.00722125		HRV	0.0286068	0.0272232	0.0235586	0.0204919	0.0173584	0.014852	0.012614	0.0124939	0.0122101	0.0111442	0.00998184	0.0089795	0.00797399		HRV	0.0286068	0.0263965	0.0208089
SVN	Developing country	0.018813	0.0173927	0.0138576	0.0111461	0.00837565	0.00586319	0.00462793	0.00433411	0.00421309	0.00390919	0.00362614	0.00323911	0.00276418		SVN	0.018813	0.0176243	0.0151071	0.0128487	0.0106457	0.0089709	0.00751085	0.00741058	0.0069793	0.0061802	0.00545495	0.00485918	0.00420292		SVN	0.018813	0.0176809	0.015277	0.0132207	0.0111094	0.00941288	0.00790691	0.00775643	0.00749957	0.00671937	0.00594847	0.00529266	0.00464103		SVN	0.018813	0.0171439	0.0134939
SJM	Developing country	0.00882396	0.00607415	0.00555043	0.00511931	0.0041134	0.00363898	0.0031827	0.00329449	0.0032883	0.00361543	0.00382429	0.00353043	0.00324556		SJM	0.00882396	0.00623888	0.00615289	0.00607264	0.00575621	0.00562939	0.00518448	0.00551655	0.00571214	0.00574083	0.00589587	0.00581296	0.00544073		SJM	0.00882396	0.00627129	0.00625468	0.00626355	0.00608341	0.00588623	0.00539037	0.00596413	0.00611742	0.00631851	0.00643636	0.00622785	0.00548964		SJM	0.00882396	0.00594466	0.00533567
POL	Developing country	0.0233501	0.020405	0.0159544	0.0126174	0.00940464	0.00658208	0.00522958	0.0049366	0.00483052	0.00446463	0.00410225	0.00366071	0.00312126		POL	0.0233501	0.0206766	0.0173734	0.0145448	0.0119536	0.0100708	0.0084873	0.00844074	0.00800213	0.00705832	0.00617118	0.00549166	0.00474586		POL	0.0233501	0.0207431	0.0175688	0.0149659	0.0124742	0.010567	0.00893484	0.00883467	0.00859864	0.0076741	0.0067295	0.00598156	0.00524056		POL	0.0233501	0.0201131	0.0155182
BIH	Developing country	0.0499274	0.0364379	0.0279301	0.0215964	0.0149173	0.0116066	0.00912408	0.0085946	0.00782518	0.00735773	0.00679031	0.00558448	0.00462223		BIH	0.0499274	0.0374261	0.0307535	0.0256182	0.020875	0.017955	0.0148627	0.0143915	0.0135932	0.0116831	0.0104685	0.009195	0.00774854		BIH	0.0499274	0.0376205	0.0312623	0.0264236	0.0220616	0.0187742	0.015453	0.0155591	0.0145576	0.0128588	0.0114282	0.00985128	0.0078182		BIH	0.0499274	0.0356611	0.0266689
HUN	Developing country	0.0270912	0.0218119	0.0171952	0.0136533	0.0101827	0.00704789	0.00547474	0.00504735	0.00483303	0.00433551	0.003865	0.00333083	0.00277143		HUN	0.0270912	0.0221023	0.0187338	0.0157389	0.0129425	0.0107835	0.00888517	0.00863011	0.00800628	0.00685419	0.00581428	0.00499678	0.00421394		HUN	0.0270912	0.0221733	0.0189445	0.0161946	0.0135062	0.0113148	0.00935369	0.00903288	0.00860311	0.00745215	0.00634031	0.00544254	0.0046532		HUN	0.0270912	0.0214999	0.0167334
SVK	Developing country	0.0204211	0.0193145	0.0150311	0.0116572	0.00851999	0.00584622	0.00455149	0.00422148	0.00406588	0.00366842	0.00331275	0.00291902	0.00246904		SVK	0.0204211	0.0195716	0.0163633	0.0134379	0.0108292	0.00894493	0.00738679	0.00721801	0.00673544	0.00579955	0.0049835	0.004379	0.00375416		SVK	0.0204211	0.0196345	0.0165473	0.0138269	0.0113008	0.00938563	0.0077763	0.00755488	0.00723753	0.00630551	0.00543436	0.00476964	0.0041455		SVK	0.0204211	0.0190383	0.014616
MNE	Developing country	0.0472654	0.0319953	0.0260062	0.0213873	0.0155511	0.0125933	0.0101675	0.0097196	0.00894304	0.00841669	0.00772391	0.00624284	0.00504525		MNE	0.0472654	0.032863	0.0287037	0.02537	0.0217619	0.0194815	0.0165624	0.0162752	0.015535	0.0133646	0.0119079	0.010279	0.00845767		MNE	0.0472654	0.0330337	0.0291785	0.0261677	0.0229989	0.0203703	0.0172202	0.0175957	0.0166372	0.0147095	0.0129995	0.0110127	0.00853371		MNE	0.0472654	0.0313132	0.0248913
SRB	Developing country	0.0373145	0.02675	0.0221397	0.0194232	0.014988	0.0127348	0.0106786	0.010546	0.0099885	0.00982019	0.00924323	0.00758181	0.00619642		SRB	0.0373145	0.0274754	0.0244535	0.0230402	0.0209739	0.0197003	0.017395	0.017659	0.0173511	0.0155932	0.0142502	0.0124837	0.0103875		SRB	0.0373145	0.0276181	0.024858	0.0237646	0.0221661	0.0205992	0.0180858	0.0190917	0.0185822	0.0171623	0.0155565	0.0133747	0.0104808		SRB	0.0373145	0.0261797	0.0212056
ALB	Developing country	0.0538763	0.0355037	0.0289685	0.0243106	0.0178338	0.0144006	0.0115549	0.0109964	0.0100896	0.00939133	0.00840823	0.00663279	0.00524998		ALB	0.0538763	0.0364666	0.0319781	0.0288377	0.0249562	0.0222772	0.0188225	0.0184132	0.0175268	0.0149122	0.0129629	0.0109211	0.00880088		ALB	0.0538763	0.036656	0.0325071	0.0297443	0.0263748	0.0232937	0.01957	0.0199071	0.0187703	0.0164128	0.0141512	0.0117005	0.00888		ALB	0.0538763	0.0347469	0.0277308
GRC	Developed income	0.0255767	0.0243555	0.0191179	0.0148056	0.010764	0.00730051	0.00556927	0.00502623	0.00471629	0.00411921	0.0036413	0.00312699	0.00259209		GRC	0.0255767	0.0246798	0.0208231	0.0170672	0.0136814	0.0111701	0.00903859	0.00859399	0.00781289	0.00651222	0.00547775	0.00469098	0.00394127		GRC	0.0255767	0.0247591	0.0210573	0.0175613	0.0142772	0.0117204	0.0095152	0.00899507	0.00839529	0.00708035	0.00597333	0.00510946	0.0043521		GRC	0.0255767	0.0240072	0.0185996
MKD	Developing country	0.0358064	0.0319893	0.02461	0.0189645	0.0130698	0.0101512	0.00794119	0.00742047	0.00672292	0.00616845	0.00559576	0.00452975	0.00368992		MKD	0.0358064	0.0328568	0.027102	0.0224961	0.0182896	0.0157035	0.0129359	0.0124254	0.0116784	0.0097947	0.00862691	0.00745836	0.00618564		MKD	0.0358064	0.0330275	0.0275503	0.0232033	0.0193292	0.01642	0.0134496	0.0134335	0.012507	0.0107803	0.00941777	0.00799069	0.00624125		MKD	0.0358064	0.0313073	0.0235023
ROU	Developed income	0.0312715	0.0285503	0.0219527	0.0173397	0.0129159	0.0089716	0.00700413	0.00649471	0.00620745	0.00556464	0.00497446	0.00430138	0.0035918		ROU	0.0312715	0.0289305	0.0238807	0.0199884	0.0164165	0.0137269	0.0113673	0.0111048	0.0102831	0.00879736	0.00748327	0.00645275	0.00546131		ROU	0.0312715	0.0290234	0.0241493	0.0205671	0.0171315	0.0144032	0.0119667	0.0116231	0.0110497	0.00956486	0.0081603	0.0070284	0.00603059		ROU	0.0312715	0.028142	0.0213307
LTU	Developing country	0.0262414	0.0196736	0.0157025	0.0126167	0.00947455	0.00664712	0.00531643	0.00508369	0.00503514	0.0047269	0.00444545	0.00408585	0.00357766		LTU	0.0262414	0.0199356	0.0171202	0.0145439	0.0120425	0.0101703	0.00862824	0.00869223	0.00834109	0.00747294	0.00668747	0.00612942	0.00543982		LTU	0.0262414	0.0199997	0.0173128	0.014965	0.012567	0.0106714	0.00908321	0.0090979	0.00896287	0.00812489	0.00729249	0.00667623	0.00600686		LTU	0.0262414	0.0193923	0.0152921
LVA	Developing country	0.0309911	0.0232986	0.0179632	0.0141555	0.0105605	0.0073581	0.00581809	0.00548266	0.00533015	0.00491032	0.00451727	0.00400891	0.00342392		LVA	0.0309911	0.0236088	0.019544	0.0163178	0.0134227	0.0112582	0.00944241	0.0093744	0.00882979	0.00776292	0.00679551	0.00601401	0.00520605		LVA	0.0309911	0.0236846	0.0197639	0.0167902	0.0140073	0.0118128	0.00994031	0.0098119	0.00948801	0.00844017	0.00741031	0.00655051	0.00574872		LVA	0.0309911	0.0229654	0.0174571
FIN	Developed income	0.0177241	0.0158275	0.0129755	0.0105348	0.00791643	0.0055335	0.00435907	0.00407878	0.00397533	0.00368711	0.0033885	0.00299855	0.00253472		FIN	0.0177241	0.0160383	0.0141692	0.0121441	0.010062	0.00846646	0.0070745	0.00697402	0.00658543	0.0058291	0.00509745	0.00449831	0.00385403		FIN	0.0177241	0.0160898	0.0143286	0.0124956	0.0105003	0.00888359	0.00744754	0.00729949	0.00707634	0.00633764	0.00555863	0.0048996	0.00425577		FIN	0.0177241	0.0156012	0.0126562
EST	Developed income	0.0275746	0.0207461	0.015778	0.011977	0.00860478	0.0058117	0.00448068	0.00414607	0.00396676	0.00355667	0.00323381	0.00284797	0.00239148		EST	0.0275746	0.0210223	0.017152	0.0138065	0.0109369	0.00889211	0.00727188	0.00708908	0.00657123	0.00562288	0.00486474	0.00427241	0.00363624		EST	0.0275746	0.0210898	0.017345	0.0142062	0.0114133	0.0093302	0.00765533	0.00741992	0.00706108	0.00611343	0.00530486	0.00465355	0.00401528		EST	0.0275746	0.0204494	0.0153205
BGR	Developing country	0.0288356	0.0294211	0.0216933	0.0161518	0.0115391	0.00779354	0.00598898	0.00548209	0.00521689	0.00469617	0.00430063	0.00382525	0.0032854		BGR	0.0288356	0.0298129	0.0235361	0.018619	0.0146666	0.0119244	0.00971975	0.00937344	0.00864216	0.00742436	0.0064696	0.00573849	0.00499544		BGR	0.0288356	0.0299087	0.0238008	0.019158	0.0153054	0.0125119	0.0102323	0.0098109	0.00928639	0.00807207	0.00705492	0.00625042	0.00551616		BGR	0.0288356	0.0290004	0.0210229
BLR	Developing country	0.0418845	0.0326632	0.024831	0.0190954	0.0133745	0.00943573	0.00723823	0.00657509	0.00591244	0.00486257	0.00431734	0.00375324	0.00315705		BLR	0.0418845	0.0335122	0.0276931	0.0225186	0.0173646	0.0138776	0.0119384	0.0110858	0.0100459	0.00828597	0.00686857	0.00607447	0.00468438		BLR	0.0418845	0.0336359	0.0280406	0.0231327	0.0177822	0.0144982	0.0124637	0.0116106	0.0107957	0.00887506	0.00697289	0.00601413	0.00517661		BLR	0.0418845	0.0318535	0.0247261
TUR	Developing country	0.0199074	0.0196021	0.0161295	0.013462	0.00984814	0.00796215	0.00638578	0.00606397	0.00556012	0.00518593	0.00469817	0.00374641	0.00300422		TUR	0.0199074	0.0201337	0.0178111	0.0159689	0.0137813	0.0123172	0.0104022	0.010154	0.00965853	0.00823459	0.00724312	0.00616856	0.00503617		TUR	0.0199074	0.0202382	0.0181057	0.0164709	0.0145647	0.0128792	0.0108152	0.0109778	0.0103438	0.00906321	0.00790712	0.00660884	0.00508145		TUR	0.0199074	0.0191842	0.0154454
MDA	Developing country	0.0523287	0.0464498	0.0351129	0.0286002	0.0206742	0.0146959	0.0112324	0.0102015	0.00919591	0.0074369	0.00637035	0.00532611	0.00434346		MDA	0.0523287	0.0476571	0.039148	0.0337273	0.0268421	0.0216139	0.018526	0.0172	0.0156249	0.0126727	0.0101348	0.00862009	0.00644475		MDA	0.0523287	0.047833	0.0396393	0.0346471	0.0274877	0.0225805	0.0193413	0.0180142	0.016791	0.0135737	0.0102887	0.00853447	0.00712195		MDA	0.0523287	0.0452983	0.0349538
CYP	Developed income	0.0214897	0.0261243	0.0217103	0.0181392	0.0140444	0.0100672	0.00811476	0.00771139	0.00756178	0.00697486	0.00631868	0.00551649	0.00460889		CYP	0.0214897	0.0264721	0.023726	0.02091	0.0178508	0.0154032	0.0131698	0.0131852	0.0125267	0.0110268	0.00950544	0.00827561	0.00700779		CYP	0.0214897	0.0265572	0.0239929	0.0215154	0.0186283	0.0161621	0.0138642	0.0138005	0.0134605	0.0119888	0.0103654	0.00901387	0.00773828		CYP	0.0214897	0.0257507	0.0211925
IRN	Developing country	0.0257941	0.0253744	0.0223618	0.0204168	0.0179341	0.0155709	0.0137845	0.0127444	0.0116978	0.00966328	0.00831817	0.0070338	0.00581341		IRN	0.0257941	0.0259525	0.0252844	0.0256365	0.025931	0.0248724	0.0231446	0.020096	0.0184774	0.0145004	0.0120569	0.0102695	0.00866862		IRN	0.0257941	0.0260258	0.0255326	0.026245	0.0251216	0.0238173	0.0237536	0.0208399	0.0194018	0.0151713	0.012653	0.0107831	0.00912202		IRN	0.0257941	0.0247029	0.020995
UKR	Developing country	0.0667425	0.0604551	0.0438676	0.0327123	0.0222026	0.0151251	0.0111739	0.00978846	0.00854808	0.00667879	0.00563714	0.00469955	0.00382575		UKR	0.0667425	0.0620265	0.0487968	0.0385765	0.0288264	0.0222453	0.0184297	0.0165036	0.0145242	0.0113809	0.00896828	0.00760604	0.00567658		UKR	0.0667425	0.0622554	0.0494092	0.0396285	0.0295197	0.0232401	0.0192407	0.0172849	0.0156081	0.01219	0.00910449	0.00753049	0.00627307		UKR	0.0667425	0.0589564	0.0435689
GEO	Developing country	0.0374281	0.0415489	0.0318853	0.0259453	0.0186552	0.0131698	0.00996086	0.00893401	0.00799058	0.00643085	0.00554705	0.00470033	0.00385857		GEO	0.0374281	0.0426288	0.0355787	0.0305965	0.0242207	0.0193694	0.0164289	0.015063	0.0135769	0.0109584	0.00882495	0.0076073	0.00572528		GEO	0.0374281	0.0427861	0.0360253	0.0314308	0.0248032	0.0202356	0.0171519	0.0157761	0.0145902	0.0117375	0.00895899	0.00753173	0.00632688		GEO	0.0374281	0.0405188	0.0317669
ARM	Developing country	0.0500201	0.0473162	0.0374398	0.0313415	0.0232579	0.0169865	0.0133047	0.0123241	0.0113191	0.00955292	0.00846718	0.00722686	0.00597743		ARM	0.0500201	0.048546	0.0418446	0.03696	0.0301965	0.0249828	0.021944	0.0207787	0.0192324	0.0162785	0.0134707	0.0116964	0.00886921		ARM	0.0500201	0.0487252	0.0423698	0.0379679	0.0309227	0.0261001	0.0229097	0.0217624	0.0206678	0.0174358	0.0136753	0.0115802	0.00980117		ARM	0.0500201	0.0461432	0.0373615
AZE	Developing country	0.0279035	0.0405615	0.0347703	0.0321419	0.0258503	0.0199487	0.016164	0.0152049	0.013961	0.0113686	0.00971102	0.00794688	0.00624087		AZE	0.0279035	0.0416158	0.0390172	0.037904	0.0335624	0.0293395	0.0266601	0.0256358	0.0237213	0.0193724	0.0154495	0.0128617	0.0092601		AZE	0.0279035	0.0417694	0.0395069	0.0389376	0.0343696	0.0306516	0.0278332	0.0268494	0.0254917	0.0207497	0.0156842	0.012734	0.0102331		AZE	0.0279035	0.039556	0.034837
KAZ	Developing country	0.0259458	0.0226052	0.0175486	0.0143776	0.0107622	0.00815014	0.00677511	0.00669515	0.00651087	0.00600709	0.00572908	0.00518528	0.00448788		KAZ	0.0259458	0.0231928	0.0195934	0.016955	0.013973	0.0119868	0.0111745	0.0112882	0.0110627	0.0102363	0.00911455	0.00839216	0.00665905		KAZ	0.0259458	0.0232784	0.0198393	0.0174174	0.014309	0.0125229	0.0116662	0.0118226	0.0118883	0.010964	0.00925298	0.0083088	0.00735877		KAZ	0.0259458	0.0220448	0.0174942
TKM	Developing country	0.0377615	0.0325769	0.0230652	0.0165282	0.0113422	0.00792663	0.00608733	0.0056164	0.00521965	0.00467454	0.00448862	0.00423461	0.00385089		TKM	0.0377615	0.0334236	0.0256205	0.0194911	0.014726	0.0116581	0.0100401	0.00946941	0.00886878	0.00796557	0.00714107	0.00685354	0.00571388		TKM	0.0377615	0.033547	0.025942	0.0200226	0.0150802	0.0121794	0.0104819	0.00991768	0.00953067	0.00853188	0.00724953	0.00678547	0.00631429		TKM	0.0377615	0.0317693	0.0228756
UZB	Developing country	0.0596119	0.0648125	0.0494245	0.0393405	0.027925	0.0196001	0.0148099	0.0132634	0.0118459	0.00954895	0.00816835	0.00687242	0.00563412		UZB	0.0596119	0.0664971	0.0551306	0.046393	0.0362561	0.0288269	0.0244266	0.0223625	0.0201275	0.0162717	0.0129952	0.0111227	0.00835981		UZB	0.0596119	0.0667426	0.0558225	0.0476581	0.037128	0.030116	0.0255015	0.0234211	0.0216296	0.0174285	0.0131926	0.0110123	0.00923825		UZB	0.0596119	0.0632058	0.0492241
AFG	Developing country	0.119316	0.235677	0.210589	0.178933	0.144228	0.11847	0.0896299	0.0705281	0.0560722	0.0363715	0.0238706	0.0158018	0.0104836		AFG	0.119316	0.244397	0.2268	0.201264	0.174557	0.15081	0.126113	0.0973315	0.0786357	0.0505701	0.0332997	0.0225524	0.0151553		AFG	0.119316	0.245341	0.229953	0.207168	0.18187	0.154409	0.130597	0.102374	0.0828816	0.0536935	0.0353209	0.0239118	0.0163326		AFG	0.119316	0.229513	0.196142
TJK	Developing country	0.0683499	0.150567	0.108553	0.0779511	0.0501833	0.0321616	0.0224153	0.0187742	0.0158824	0.0118183	0.00943239	0.00745692	0.00577851		TJK	0.0683499	0.154481	0.120705	0.0919252	0.0651548	0.0473017	0.0369706	0.0316539	0.026986	0.0201388	0.0150062	0.0120687	0.00857406		TJK	0.0683499	0.155051	0.12222	0.094432	0.0667217	0.049417	0.0385975	0.0331523	0.029	0.0215705	0.0152342	0.0119489	0.00947501		TJK	0.0683499	0.146835	0.107773
KGZ	Developing country	0.116841	0.156767	0.114589	0.0821304	0.0530955	0.0342358	0.0240048	0.0201403	0.0169703	0.0124926	0.0100018	0.00792349	0.00618373		KGZ	0.116841	0.160842	0.127518	0.0968538	0.068936	0.0503523	0.0395923	0.033957	0.0288345	0.0212878	0.0159121	0.0128239	0.00917531		KGZ	0.116841	0.161435	0.129119	0.0994949	0.0705938	0.0526041	0.0413345	0.0355645	0.0309865	0.0228013	0.0161538	0.0126965	0.0101394		KGZ	0.116841	0.152881	0.113856
MEX	Developing country	0.0272268	0.0266373	0.0225793	0.0190214	0.0153772	0.0136539	0.00995371	0.00888561	0.0081515	0.00680665	0.00560386	0.00460868	0.00377382		MEX	0.0272268	0.0269111	0.0254338	0.0223383	0.0210963	0.0202172	0.0172464	0.0138636	0.0123993	0.00998427	0.00732238	0.00599091	0.00486656		MEX	0.0272268	0.0270725	0.0253136	0.023182	0.0202553	0.0176035	0.0161118	0.0136443	0.0123608	0.0100091	0.00803752	0.00658816	0.00532548		MEX	0.0272268	0.0262519	0.0214353
USA	Developed income	0.0122168	0.010557	0.00871473	0.00723348	0.00576105	0.00445253	0.00378996	0.00375159	0.00372647	0.00362646	0.00350316	0.00332529	0.00313275		USA	0.0122168	0.0107449	0.00965601	0.0085108	0.00722602	0.00632055	0.00554091	0.00571102	0.00563832	0.00541561	0.0051433	0.00488369	0.00457732		USA	0.0122168	0.0107838	0.00979074	0.00880115	0.00768193	0.00673806	0.00597487	0.00602187	0.00617509	0.0059838	0.00564268	0.00536106	0.00503425		USA	0.0122168	0.0103867	0.00847847
GTM	Developing country	0.0315867	0.0500272	0.0426532	0.0366838	0.0298261	0.0263036	0.0188944	0.016521	0.0147694	0.0116294	0.00895853	0.00688117	0.00528896		GTM	0.0315867	0.0505414	0.0480497	0.0430806	0.040919	0.0389475	0.0327375	0.0257766	0.0224658	0.0170585	0.0117058	0.00894496	0.00682042		GTM	0.0315867	0.0508444	0.0478228	0.0447078	0.0392877	0.0339124	0.0305838	0.0253687	0.0223961	0.0171008	0.0128491	0.00983671	0.00746359		GTM	0.0315867	0.0493033	0.0404957
ECU	Developing country	0.0411228	0.0430974	0.0359034	0.0296751	0.0233435	0.0201388	0.0143092	0.0124565	0.0111447	0.00891291	0.00707703	0.00565763	0.00453602		ECU	0.0411228	0.0435403	0.0404314	0.0348497	0.0320255	0.0298192	0.0247929	0.0194351	0.0169522	0.0130738	0.00924732	0.00735446	0.00584947		ECU	0.0411228	0.0438014	0.0402405	0.036166	0.0307487	0.0259642	0.0231618	0.0191276	0.0168996	0.0131063	0.0101505	0.00808765	0.00640108		ECU	0.0411228	0.0424737	0.0340751
SLV	Developing country	0.0411612	0.0529957	0.0445765	0.0371449	0.0293809	0.025433	0.0181121	0.015831	0.0142524	0.0114033	0.00896689	0.00709607	0.00562148		SLV	0.0411612	0.0535404	0.0502059	0.0436221	0.0403083	0.0376584	0.0313821	0.0247	0.0216795	0.0167268	0.0117167	0.0092243	0.00724923		SLV	0.0411612	0.0538615	0.0499688	0.0452697	0.0387013	0.0327899	0.0293175	0.0243092	0.0216122	0.0167683	0.0128611	0.0101439	0.00793284		SLV	0.0411612	0.0522288	0.0423129
HND	Developing country	0.0649036	0.0941909	0.0745446	0.0580477	0.0432212	0.0354036	0.0239559	0.0199666	0.0171754	0.0126996	0.00933627	0.00694591	0.0052206		HND	0.0649036	0.095159	0.0838764	0.0681699	0.0592962	0.0524218	0.0415074	0.0311525	0.0261256	0.0186283	0.0121994	0.00902911	0.00673227		HND	0.0649036	0.0957295	0.0834803	0.0707446	0.0569321	0.0456446	0.0387767	0.0306596	0.0260445	0.0186746	0.0133908	0.00992925	0.00736712		HND	0.0649036	0.0928278	0.0706901
BLZ	Developing country	0.0653977	0.0598779	0.050339	0.0409677	0.031821	0.0271948	0.0191829	0.0166187	0.0148046	0.0116395	0.00905767	0.00709899	0.0055869		BLZ	0.0653977	0.0604934	0.0566956	0.0481116	0.0436559	0.040267	0.0332374	0.025929	0.0225194	0.0170733	0.0118353	0.0092281	0.00720464		BLZ	0.0653977	0.0608561	0.0564279	0.0499287	0.0419154	0.0350613	0.0310508	0.0255187	0.0224495	0.0171157	0.0129913	0.0101481	0.00788404		BLZ	0.0653977	0.0590114	0.0477824
NIC	Developing country	0.0538821	0.0828528	0.0660591	0.0518626	0.0388161	0.0319335	0.0216648	0.0180548	0.0155274	0.0115303	0.00858647	0.00648272	0.00494525		NIC	0.0538821	0.0837044	0.0743378	0.0609062	0.0532527	0.0472835	0.0375377	0.0281697	0.0236188	0.0169132	0.0112196	0.008427	0.0063772		NIC	0.0538821	0.0842063	0.0739867	0.0632066	0.0511296	0.0411707	0.0350681	0.0277239	0.0235455	0.0169552	0.0123154	0.00926712	0.00697857		NIC	0.0538821	0.0816538	0.062651
CRI	Developing country	0.0268755	0.0249151	0.0211398	0.018247	0.0150656	0.013685	0.0102602	0.00943139	0.0088673	0.00767539	0.00646883	0.00544591	0.00457307		CRI	0.0268755	0.0251712	0.0238126	0.0214289	0.0206689	0.0202632	0.0177774	0.0147152	0.0134881	0.0112586	0.0084526	0.00707923	0.00589725		CRI	0.0268755	0.0253221	0.0237002	0.0222383	0.0198448	0.0176436	0.0166079	0.0144823	0.0134463	0.0112865	0.00927813	0.00778499	0.00645336		CRI	0.0268755	0.0245546	0.020069
CUB	Developing country	0.0406227	0.0391175	0.0336342	0.0295813	0.0245297	0.0219251	0.0160388	0.0143721	0.0131667	0.0108558	0.00872751	0.00702048	0.00560326		CUB	0.0406227	0.0395195	0.0378945	0.0347396	0.0336529	0.0324642	0.0277897	0.0224239	0.0200279	0.0159237	0.0114039	0.00912604	0.00722574		CUB	0.0406227	0.0397565	0.0377155	0.0360517	0.0323112	0.0282672	0.0259615	0.0220691	0.0199658	0.0159632	0.0125177	0.0100358	0.00790713		CUB	0.0406227	0.0385514	0.031937
PAN	Developing country	0.0217788	0.0182629	0.0146038	0.0120358	0.00963307	0.0085439	0.006284	0.00569951	0.0053299	0.0046716	0.0040483	0.00350802	0.00303179		PAN	0.0217788	0.0184506	0.0164347	0.0141346	0.0132158	0.0126509	0.010888	0.00889256	0.00810735	0.00685248	0.00528978	0.00456013	0.00390967		PAN	0.0217788	0.0185612	0.0163571	0.0146684	0.0126889	0.0110154	0.0101717	0.00875185	0.0080822	0.0068695	0.00580641	0.00501475	0.00427836		PAN	0.0217788	0.0179986	0.013851
PER	Developing country	0.0295871	0.0316248	0.0247377	0.0194813	0.0149674	0.0128259	0.00913323	0.00802839	0.00729865	0.00607343	0.005037	0.0041967	0.00350383		PER	0.0295871	0.0319498	0.027829	0.0228783	0.0205341	0.0189912	0.0158248	0.0125262	0.011102	0.00890875	0.00658168	0.00545537	0.00451839		PER	0.0295871	0.0321414	0.0276976	0.0237425	0.0197155	0.016536	0.0147837	0.012328	0.0110676	0.00893087	0.00722449	0.00599923	0.00494448		PER	0.0295871	0.0311671	0.023454
COL	Developing country	0.0284822	0.0293469	0.0249352	0.0214788	0.0176007	0.0158023	0.0116431	0.0104871	0.00968717	0.00813665	0.0067034	0.00551964	0.00454416		COL	0.0284822	0.0296485	0.0280885	0.0252242	0.0241469	0.0233984	0.0201736	0.0163623	0.0147352	0.0119352	0.00875911	0.00717508	0.00585996		COL	0.0284822	0.0298263	0.0279559	0.0261769	0.0231842	0.0203734	0.0188464	0.0161034	0.0146895	0.0119648	0.00961457	0.00789039	0.00641256		COL	0.0284822	0.0289222	0.0236727
BHS	Developed income	0.0217005	0.0141951	0.0128209	0.011537	0.00986276	0.0092105	0.00709905	0.00669854	0.00647554	0.00586074	0.00516021	0.00453121	0.00394995		BHS	0.0217005	0.014341	0.0144554	0.0135488	0.0135309	0.0136379	0.0123002	0.0104513	0.00984998	0.00859676	0.00674267	0.0058902	0.0050937		BHS	0.0217005	0.014427	0.0143871	0.0140605	0.0129915	0.0118748	0.011491	0.0102859	0.00981942	0.00861811	0.0074012	0.00647742	0.00557404		BHS	0.0217005	0.0139897	0.0121829
JAM	Developing country	0.0516602	0.0504762	0.0439371	0.0382468	0.0312261	0.0275976	0.0199241	0.0175525	0.0159179	0.012895	0.0102002	0.00808039	0.00638402		JAM	0.0516602	0.050995	0.0495116	0.0449162	0.0428398	0.0408634	0.0345216	0.027386	0.0242128	0.0189149	0.0133283	0.0105038	0.00823257		JAM	0.0516602	0.0513008	0.0492778	0.0466127	0.0411318	0.0355806	0.0322505	0.0269526	0.0241377	0.0189619	0.01463	0.011551	0.00900891		JAM	0.0516602	0.0497458	0.0417278
CHL	Developed income	0.0251272	0.0208373	0.017348	0.0145177	0.0116552	0.0103137	0.00756411	0.00684622	0.0063732	0.0054593	0.0046126	0.00389524	0.00326641		CHL	0.0251272	0.0210515	0.0195356	0.0170493	0.0159901	0.0152714	0.013106	0.0106817	0.00969432	0.00800791	0.00602713	0.00506349	0.00421224		CHL	0.0251272	0.0211777	0.0194434	0.0176932	0.0153526	0.0132971	0.0122438	0.0105127	0.00966424	0.0080278	0.00661577	0.00556829	0.00460945		CHL	0.0251272	0.0205358	0.0164644
HTI	Developing country	0.0858941	0.16091	0.127567	0.0973359	0.0704672	0.0558133	0.0364176	0.0291983	0.0241424	0.0166332	0.0115622	0.00826027	0.0060597		HTI	0.0858941	0.162564	0.14354	0.114309	0.0966755	0.0826422	0.0630993	0.0455562	0.0367232	0.0243982	0.015108	0.0107377	0.00781434		HTI	0.0858941	0.163539	0.142862	0.118626	0.0928212	0.0719582	0.0589481	0.0448353	0.0366093	0.0244588	0.0165835	0.0118082	0.00855123		HTI	0.0858941	0.158582	0.120974
BRA	Developing country	0.0369737	0.0280537	0.0239508	0.0207565	0.0172137	0.015711	0.0118204	0.0108654	0.0102335	0.00897257	0.00763866	0.00646653	0.00541081		BRA	0.0369737	0.0283421	0.0269816	0.024376	0.0236158	0.0232632	0.0204807	0.0169525	0.0155663	0.0131613	0.00998119	0.00840596	0.00697756		BRA	0.0369737	0.028512	0.0268542	0.0252966	0.0226743	0.0202557	0.0191333	0.0166843	0.015518	0.013194	0.010956	0.00924397	0.00763554		BRA	0.0369737	0.0276477	0.0227398
ARG	Developing country	0.0355415	0.0250722	0.0204577	0.0164201	0.0129002	0.0113377	0.00826784	0.00742565	0.00687612	0.00589978	0.00502529	0.0042899	0.00365206		ARG	0.0355415	0.0253299	0.0230301	0.0192833	0.0176981	0.0167875	0.0143253	0.0115858	0.0104593	0.00865402	0.00656637	0.00557652	0.00470955		ARG	0.0355415	0.0254818	0.0229214	0.0200117	0.0169925	0.0146172	0.0133829	0.0114024	0.0104269	0.00867551	0.00720768	0.00613246	0.00515366		ARG	0.0355415	0.0247094	0.0194095
VEN	Developing country	0.0281795	0.0360061	0.0305926	0.0251776	0.0199325	0.0173944	0.012529	0.0110887	0.0101028	0.0084108	0.00692743	0.00570005	0.00468184		VEN	0.0281795	0.0363762	0.0344614	0.029568	0.0273459	0.0257557	0.0217085	0.017301	0.0153675	0.0123373	0.00905184	0.00740959	0.00603751		VEN	0.0281795	0.0365943	0.0342987	0.0306848	0.0262557	0.022426	0.0202804	0.0170272	0.0153198	0.0123679	0.00993589	0.00814828	0.00660685		VEN	0.0281795	0.0354851	0.0290437
DOM	Developing country	0.0276137	0.0219918	0.0187112	0.0167387	0.0142702	0.0132941	0.0101538	0.00945858	0.00901644	0.00803458	0.00696141	0.00597467	0.00508993		DOM	0.0276137	0.0222178	0.0210778	0.0196575	0.0195777	0.0196844	0.0175931	0.0147576	0.013715	0.0117854	0.00909624	0.00776658	0.00656376		DOM	0.0276137	0.0223511	0.0209783	0.0204	0.0187971	0.0171396	0.0164357	0.0145241	0.0136724	0.0118147	0.00998463	0.00854086	0.00718272		DOM	0.0276137	0.0216736	0.0177642
BOL	Developing country	0.056076	0.0597296	0.0469053	0.0364991	0.0273517	0.0226295	0.0155052	0.0130862	0.0114067	0.00871486	0.00665597	0.00517059	0.00406665		BOL	0.056076	0.0603435	0.0527703	0.0428637	0.0375244	0.0335072	0.0268652	0.0204176	0.0173509	0.0127833	0.00869714	0.00672134	0.00524419		BOL	0.056076	0.0607053	0.0525211	0.0444827	0.0360284	0.0291754	0.0250978	0.0200945	0.017297	0.012815	0.00954655	0.00739141	0.00573872		BOL	0.056076	0.0588652	0.0444742
PRY	Developing country	0.0337929	0.0313754	0.0265584	0.0229725	0.018847	0.0168261	0.0122875	0.0109477	0.0099804	0.00816996	0.00657037	0.0052933	0.00425225		PRY	0.0337929	0.0316979	0.0299152	0.0269784	0.0258567	0.0249142	0.0212901	0.017081	0.0151812	0.011984	0.00858528	0.00688086	0.00548353		PRY	0.0337929	0.0318879	0.029774	0.0279974	0.0248258	0.0216932	0.0198894	0.0168107	0.0151341	0.0120138	0.00942377	0.00756683	0.00600063		PRY	0.0337929	0.0309213	0.0252122
TTO	Developing country	0.0145777	0.0156135	0.0133024	0.011324	0.00931198	0.00853772	0.00651439	0.00606526	0.00574661	0.00509558	0.00447723	0.00390733	0.00338076		TTO	0.0145777	0.0157739	0.0149853	0.0132986	0.0127753	0.0126417	0.0112872	0.00946323	0.00874121	0.00747439	0.00585025	0.0050792	0.00435969		TTO	0.0145777	0.0158685	0.0149145	0.0138009	0.012266	0.0110074	0.0105446	0.00931349	0.00871409	0.00749295	0.00642161	0.00558557	0.00477081		TTO	0.0145777	0.0153875	0.0126294
FLK	Developing country	0.00383795	0.00238588	0.00227346	0.00220292	0.0020318	0.00204995	0.00169523	0.00171263	0.00177058	0.00185294	0.00187926	0.00188061	0.00185066		FLK	0.00383795	0.00241041	0.00256523	0.00258706	0.00278747	0.00303533	0.00293725	0.0026721	0.00269324	0.00271796	0.00245557	0.00244464	0.00238654		FLK	0.00383795	0.00242486	0.00255312	0.00268477	0.00267633	0.00264292	0.00274401	0.00262982	0.00268489	0.00272471	0.00269539	0.00268836	0.00261159		FLK	0.00383795	0.00235136	0.00216195
GUY	Developing country	0.0563915	0.023553	0.0207924	0.0197323	0.0178202	0.0173161	0.0135828	0.0128681	0.0124397	0.011228	0.00937003	0.00767834	0.00620479		GUY	0.0563915	0.0237951	0.0234353	0.0231731	0.0244479	0.0256397	0.0235344	0.0200772	0.0189221	0.0164696	0.0122435	0.00998121	0.00800145		GUY	0.0563915	0.0239378	0.0233246	0.0240484	0.0234732	0.022325	0.0219861	0.0197595	0.0188634	0.0165105	0.0134393	0.0109763	0.00875599		GUY	0.0563915	0.0232122	0.019751
URY	Developed income	0.0263417	0.0197876	0.0165567	0.0140422	0.0114656	0.0103195	0.00763961	0.00694646	0.00650898	0.00567489	0.00486563	0.00416173	0.00353853		URY	0.0263417	0.019991	0.018646	0.0164908	0.0157299	0.01528	0.0132368	0.0108381	0.00990086	0.00832415	0.00635775	0.0054099	0.00456314		URY	0.0263417	0.0201108	0.018558	0.0171137	0.0151028	0.0133046	0.012366	0.0106666	0.00987014	0.00834483	0.00697868	0.00594923	0.00499345		URY	0.0263417	0.0195012	0.0157147
SUR	Developing country	0.0351991	0.0440131	0.0346955	0.0266402	0.0199796	0.0167343	0.0117267	0.0101755	0.00914122	0.00745859	0.00604461	0.00495375	0.00406787		SUR	0.0351991	0.0444654	0.0390363	0.0312857	0.0274104	0.0247783	0.0203184	0.0158762	0.0139048	0.0109406	0.00789829	0.00643947	0.00524576		SUR	0.0351991	0.044732	0.038852	0.0324673	0.0263176	0.021575	0.0189816	0.015625	0.0138616	0.0109677	0.00866967	0.00708145	0.00574043		SUR	0.0351991	0.0433761	0.0328994
GUF	Developing country	0.0262208	0.0212472	0.021593	0.0222586	0.0217004	0.022971	0.0198198	0.0207906	0.0222282	0.0245632	0.0259012	0.0265666	0.0264544		GUF	0.0262208	0.0214656	0.024385	0.0261399	0.0297712	0.0340129	0.0343409	0.0324381	0.0338114	0.0360302	0.0338442	0.0345344	0.0341145		GUF	0.0262208	0.0215943	0.0242698	0.0271272	0.0285843	0.0296157	0.0320817	0.0319248	0.0337065	0.0361197	0.0371496	0.0379773	0.0373315		GUF	0.0262208	0.0209398	0.0205514
SGS	Developing country	0.006086	0.00397647	0.00378874	0.00367195	0.00338644	0.00341633	0.00282575	0.00285448	0.00295071	0.00308824	0.00313257	0.00313424	0.0030848		SGS	0.006086	0.00401734	0.00427497	0.00431225	0.00464593	0.00505852	0.00489606	0.00445365	0.00448834	0.00452995	0.00409323	0.00407425	0.00397803		SGS	0.006086	0.00404143	0.00425479	0.00447512	0.00446071	0.00440455	0.00457395	0.00438318	0.00447442	0.0045412	0.00449299	0.00448042	0.00435316		SGS	0.006086	0.00391893	0.0036029
MAR	Developing country	0.0621017	0.0512362	0.0399743	0.0321363	0.0252741	0.0198079	0.0159893	0.0136691	0.0117557	0.00884927	0.00709201	0.00571	0.00456249		MAR	0.0621017	0.0524034	0.0451006	0.0403522	0.0365439	0.0316406	0.0268464	0.0215541	0.0185688	0.013279	0.0102796	0.00833672	0.00680332		MAR	0.0621017	0.0525516	0.0455433	0.04131	0.0354032	0.0302983	0.0275528	0.022352	0.0194977	0.0138933	0.0107879	0.00875367	0.00715916		MAR	0.0621017	0.0498804	0.0374494
TUN	Developing country	0.0432813	0.0392937	0.0295715	0.0227673	0.0176862	0.0140018	0.0116321	0.010309	0.00918332	0.00738403	0.00636312	0.00548744	0.00463567		TUN	0.0432813	0.0401889	0.0333406	0.028588	0.0255726	0.022366	0.0195306	0.0162558	0.0145056	0.0110803	0.00922312	0.00801179	0.00691244		TUN	0.0432813	0.0403025	0.0336678	0.0292666	0.0247743	0.0214172	0.0200445	0.0168575	0.0152313	0.0115929	0.00967912	0.00841249	0.00727398		TUN	0.0432813	0.0382539	0.0276844
SAU	Developing country	0.0105122	0.00756907	0.00697222	0.00700696	0.00679749	0.00645978	0.00622427	0.00625002	0.00620852	0.00599248	0.00582901	0.00538492	0.00475088		SAU	0.0105122	0.00774151	0.00788919	0.00879835	0.00982852	0.0103186	0.0104507	0.00985536	0.00980672	0.00899213	0.00844894	0.0078621	0.00708424		SAU	0.0105122	0.00776339	0.00796662	0.0090072	0.00952173	0.0098809	0.0107257	0.0102202	0.0102973	0.00940815	0.00886666	0.00825531	0.00745477		SAU	0.0105122	0.00736878	0.0065508
ISR	Developing country	0.0218804	0.0111198	0.00994012	0.00931524	0.0083833	0.00739441	0.00661587	0.00619082	0.00575989	0.00496562	0.00444461	0.00388014	0.00328525		ISR	0.0218804	0.0113731	0.0112419	0.0116968	0.0121215	0.0118116	0.0111082	0.009762	0.00909808	0.00745126	0.0064423	0.00566509	0.00489878		ISR	0.0218804	0.0114053	0.0113523	0.0119744	0.0117431	0.0113105	0.0114005	0.0101234	0.00955326	0.00779599	0.00676082	0.00594842	0.005155		ISR	0.0218804	0.0108255	0.00933475
JOR	Developing country	0.0534295	0.0460275	0.037165	0.0311369	0.0253293	0.0203673	0.0167907	0.0146004	0.0127178	0.00980604	0.00796435	0.00642773	0.00512809		JOR	0.0534295	0.047076	0.041958	0.0390973	0.0366238	0.0325341	0.028192	0.0230226	0.0200885	0.0147147	0.011544	0.00938464	0.00764671		JOR	0.0534295	0.0472091	0.0423698	0.0400253	0.0354806	0.0311539	0.0289338	0.0238749	0.0210935	0.0153954	0.0121148	0.009854	0.00804666		JOR	0.0534295	0.0448095	0.0348399
LBN	Developing country	0.0506717	0.0469063	0.0353507	0.0263121	0.0198905	0.0154075	0.0124808	0.0107825	0.00943471	0.00743463	0.00623424	0.00524321	0.00436174		LBN	0.0506717	0.0479748	0.0398574	0.033039	0.0287597	0.0246115	0.0209556	0.0170024	0.0149027	0.0111562	0.00903631	0.0076552	0.00650397		LBN	0.0506717	0.0481105	0.0402486	0.0338232	0.027862	0.0235674	0.021507	0.0176318	0.0156482	0.0116723	0.00948308	0.00803807	0.00684415		LBN	0.0506717	0.045665	0.0330957
SYR	Developing country	0.110323	0.0907551	0.0633567	0.0461098	0.0339996	0.0254121	0.0197458	0.0164189	0.0138611	0.0102589	0.00805593	0.00631358	0.00489921		SYR	0.110323	0.0928226	0.0713221	0.0578982	0.0491603	0.0405926	0.0331537	0.0258901	0.0218944	0.0153943	0.0116768	0.00921797	0.00730541		SYR	0.110323	0.093085	0.0720221	0.0592725	0.0476257	0.0388705	0.0340261	0.0268485	0.0229898	0.0161065	0.0122541	0.00967899	0.00768751		SYR	0.110323	0.0883535	0.0592224
IRQ	Developing country	0.0206265	0.0274636	0.0251205	0.0246908	0.0239781	0.0226398	0.0215479	0.0212837	0.0206857	0.0185997	0.0162048	0.0130735	0.0100363		IRQ	0.0206265	0.0280892	0.0284211	0.0310032	0.03467	0.036164	0.0361794	0.0335611	0.0326743	0.0279101	0.0234884	0.0190876	0.0149656		IRQ	0.0206265	0.0281686	0.0287	0.0317391	0.0335878	0.0346299	0.0371314	0.0348035	0.0343089	0.0292014	0.0246496	0.0200423	0.0157484		IRQ	0.0206265	0.0267368	0.0235995
YEM	Developing country	0.0680063	0.179894	0.142025	0.114322	0.0895093	0.0697098	0.0556772	0.0467903	0.0393617	0.0284733	0.0221614	0.0173494	0.0134953		YEM	0.0680063	0.183992	0.160274	0.14355	0.129422	0.111352	0.0934835	0.0737813	0.062174	0.0427262	0.0321221	0.0253306	0.0201234		YEM	0.0680063	0.184512	0.161847	0.146957	0.125382	0.106628	0.0959434	0.0765125	0.0652846	0.0447029	0.0337103	0.0265974	0.0211759		YEM	0.0680063	0.175133	0.133084
KWT	Developing country	0.0114241	0.00645306	0.00577592	0.00544994	0.00494495	0.00448242	0.00414307	0.00402479	0.0038955	0.00364824	0.00349229	0.00318711	0.00279409		KWT	0.0114241	0.00660007	0.0065325	0.00684326	0.00714992	0.00716007	0.00695631	0.00634649	0.00615316	0.00547445	0.00506195	0.00465326	0.00416639		KWT	0.0114241	0.00661872	0.00659661	0.0070057	0.00692674	0.00685633	0.00713937	0.00658142	0.006461	0.00572772	0.00531222	0.00488598	0.00438431		KWT	0.0114241	0.00628229	0.00542427
QAT	Developing country	0.00800262	0.00335168	0.0031027	0.00316877	0.00312583	0.00299341	0.00286825	0.00282237	0.0027212	0.00248478	0.00235065	0.00220337	0.00203963		QAT	0.00800262	0.00342804	0.00351104	0.0039789	0.00451966	0.00478158	0.00481587	0.00445046	0.00429829	0.00372859	0.00340718	0.00321697	0.00304138		QAT	0.00800262	0.00343773	0.0035455	0.00407334	0.00437858	0.00457874	0.00494259	0.00461521	0.00451334	0.0039011	0.00357563	0.00337786	0.00320046		QAT	0.00800262	0.00326299	0.0029154
OMN	Developing country	0.0191616	0.0119982	0.0108916	0.0101427	0.00914417	0.0081749	0.00743219	0.00691278	0.00634799	0.00530059	0.00462787	0.00398873	0.00336973		OMN	0.0191616	0.0122715	0.0123211	0.0127358	0.0132216	0.0130583	0.0124788	0.0109004	0.010027	0.00795391	0.00670794	0.00582364	0.00502474		OMN	0.0191616	0.0123062	0.012442	0.0130381	0.0128089	0.0125044	0.0128072	0.0113039	0.0105287	0.00832189	0.00703959	0.0061149	0.00528755		OMN	0.0191616	0.0116807	0.0102308
ARE	Developed income	0.00701164	0.00498976	0.00454896	0.00450767	0.00432073	0.00407204	0.00389903	0.00388662	0.00381649	0.00360631	0.0034883	0.00329238	0.00301916		ARE	0.00701164	0.00510343	0.00514637	0.00566009	0.00624737	0.00650455	0.00654657	0.00612861	0.00602837	0.00541153	0.00505617	0.00480695	0.004502		ARE	0.00701164	0.00511786	0.00519688	0.00579444	0.00605236	0.00622861	0.00671884	0.00635548	0.00632997	0.00566189	0.00530615	0.00504737	0.00473747		ARE	0.00701164	0.00485772	0.00427329
PAK	Developing country	0.0716793	0.0768929	0.0689993	0.062386	0.0537284	0.0471726	0.0381778	0.0320232	0.0269959	0.0195084	0.0143331	0.0106705	0.0079212		PAK	0.0716793	0.0797378	0.0743062	0.0701722	0.0650265	0.0600499	0.053718	0.0441932	0.0378591	0.027124	0.0199948	0.015229	0.011451		PAK	0.0716793	0.0800457	0.0753393	0.0722306	0.0677509	0.061483	0.0556275	0.0464829	0.0399033	0.0287993	0.0212085	0.016147	0.0123406		PAK	0.0716793	0.0748816	0.0642619
CAN	Developed income	0.0163189	0.0144668	0.0124919	0.0104684	0.00858399	0.00902549	0.00643819	0.00611692	0.00570269	0.00544359	0.00497088	0.00441218	0.00385692		CAN	0.0163189	0.0167568	0.0148485	0.0132124	0.0116554	0.0138619	0.0123624	0.0087031	0.00843278	0.00763676	0.00686267	0.00612864	0.00533535		CAN	0.0163189	0.0169144	0.0151162	0.0136902	0.0121069	0.0115788	0.012072	0.00940638	0.00906213	0.00823712	0.00738534	0.00657895	0.00549157		CAN	0.0163189	0.0138627	0.0116127
PRI	Developing country	0.0185424	0.012821	0.0113733	0.0102555	0.00883637	0.00834474	0.00647158	0.00614372	0.00599529	0.00561065	0.00510339	0.00457711	0.00401856		PRI	0.0185424	0.0129528	0.0128198	0.0120438	0.0121228	0.012356	0.011213	0.00958564	0.00911948	0.00822992	0.00666843	0.00594987	0.00518217		PRI	0.0185424	0.0130304	0.0127593	0.0124987	0.0116395	0.0107586	0.0104754	0.00943396	0.00909119	0.00825036	0.00731971	0.00654303	0.00567085		PRI	0.0185424	0.0126354	0.0108044
AUS	Developed income	0.0189075	0.0152588	0.0129439	0.0107537	0.00876852	0.00913678	0.00646049	0.00607963	0.00560529	0.00527357	0.00479038	0.00424807	0.00371896		AUS	0.0189075	0.0176742	0.015366	0.0135726	0.0119059	0.0140328	0.0124052	0.00865005	0.00828875	0.00739825	0.00661349	0.00590068	0.00514452		AUS	0.0189075	0.0178404	0.015643	0.0140634	0.0123672	0.0117215	0.0121138	0.00934904	0.00890735	0.00797986	0.00711718	0.00633423	0.00529514		AUS	0.0189075	0.0146216	0.0120175
JPN	Developing country	0.0148995	0.0130894	0.0112922	0.00982353	0.00829273	0.00728618	0.0062594	0.00585683	0.00551133	0.00498545	0.00448685	0.00395948	0.00329338		JPN	0.0148995	0.013332	0.0122747	0.0112634	0.0105347	0.0101647	0.00959348	0.00883969	0.00836465	0.00754384	0.00668775	0.00591688	0.00494141		JPN	0.0148995	0.013381	0.0124215	0.0116608	0.0109443	0.0103312	0.0101011	0.00929812	0.00896788	0.00800793	0.00714853	0.00631217	0.00525438		JPN	0.0148995	0.0128833	0.0109368
NZL	Developing country	0.0243814	0.0202926	0.01743	0.0145305	0.011737	0.0119796	0.00821376	0.00748311	0.00669486	0.00594204	0.00511558	0.00431913	0.00363431		NZL	0.0243814	0.0235048	0.0207102	0.0183393	0.0159364	0.0183989	0.0157718	0.0106469	0.00989994	0.00833604	0.00706244	0.00599939	0.00502742		NZL	0.0243814	0.0237258	0.0210836	0.0190025	0.0165538	0.0153685	0.0154013	0.0115073	0.0106388	0.00899138	0.00760032	0.0064402	0.00517462		NZL	0.0243814	0.0194452	0.0161971
IDN	Developing country	0.0274388	0.0280623	0.0242865	0.0218488	0.0190137	0.0171088	0.0143344	0.0125512	0.0111227	0.00903287	0.00742969	0.00608509	0.00491271		IDN	0.0274388	0.0291005	0.0261679	0.0245757	0.0230119	0.0217792	0.0201692	0.0173212	0.0155985	0.0125591	0.0103645	0.00868469	0.00710189		IDN	0.0274388	0.0292129	0.0265317	0.0252966	0.0239761	0.022299	0.0208862	0.0182186	0.0164408	0.0133348	0.0109936	0.00920819	0.00765358		IDN	0.0274388	0.0273283	0.0226306
MYS	Developing country	0.0203051	0.0128061	0.0116094	0.0108994	0.00989506	0.00928208	0.00809374	0.00734395	0.00672567	0.00579993	0.00501727	0.00430328	0.00363338		MYS	0.0203051	0.0132799	0.0125005	0.0122597	0.0119758	0.0118159	0.0113883	0.0101349	0.00943209	0.00806409	0.00699912	0.00614168	0.00525247		MYS	0.0203051	0.0133312	0.0126743	0.0126193	0.0124776	0.0120979	0.0117931	0.01066	0.00994138	0.00856215	0.00742396	0.00651189	0.0056605		MYS	0.0203051	0.0124711	0.0108108
SGP	Developing country	0.00902492	0.00393442	0.00377541	0.00376379	0.00365255	0.00366656	0.00342802	0.00333755	0.00328235	0.00324073	0.0031764	0.00307249	0.00290948		SGP	0.00902492	0.00407999	0.00406213	0.00423353	0.00442061	0.00466746	0.00482338	0.00460594	0.00460317	0.00450584	0.0044311	0.00438508	0.00420598		SGP	0.00902492	0.00409574	0.0041186	0.00435771	0.00460583	0.00477885	0.00499484	0.00484458	0.00485172	0.00478413	0.00470007	0.0046494	0.00453271		SGP	0.00902492	0.00383151	0.00351303
BRN	Developed income	0.00762629	0.00500574	0.00481803	0.00473543	0.00450707	0.0044163	0.00400349	0.00377142	0.00357507	0.00327566	0.00301656	0.00276197	0.00248195		BRN	0.00762629	0.00519094	0.00518372	0.00532644	0.00545482	0.00562186	0.0056331	0.00520471	0.00501369	0.0045544	0.00420812	0.00394191	0.00358794		BRN	0.00762629	0.00521098	0.00525579	0.00548268	0.00568337	0.00575603	0.00583334	0.00547436	0.0052844	0.00483569	0.00446355	0.00417953	0.00386666		BRN	0.00762629	0.0048748	0.00448301
PHL	Developing country	0.0622537	0.0436104	0.0391952	0.0368464	0.0330648	0.0301911	0.0253189	0.0219937	0.0192159	0.0149502	0.0116482	0.00904799	0.00695712		PHL	0.0622537	0.0452238	0.042209	0.0414451	0.0400176	0.0384327	0.0356249	0.0303522	0.0269484	0.0207864	0.0162493	0.0129134	0.0100573		PHL	0.0622537	0.0453984	0.0427958	0.0426608	0.0416943	0.03935	0.0368913	0.0319247	0.0284034	0.0220702	0.0172356	0.0136918	0.0108386		PHL	0.0622537	0.0424696	0.0365034
TLS	Developing country	0.124216	0.212581	0.154299	0.109407	0.0772143	0.0578695	0.041544	0.0318553	0.0251948	0.0167823	0.0117078	0.00841852	0.00610425		TLS	0.124216	0.220446	0.166713	0.123062	0.093451	0.0736668	0.0584543	0.0439616	0.0353333	0.0233337	0.0163324	0.012015	0.00882439		TLS	0.124216	0.221297	0.16903	0.126671	0.0973664	0.0754249	0.0605323	0.0462392	0.0372411	0.0247749	0.0173238	0.0127392	0.00950989		TLS	0.124216	0.20702	0.144177
KOR	Developing country	0.0155367	0.00859447	0.00772543	0.00705267	0.00628694	0.00581315	0.00501548	0.00451734	0.00414666	0.00359269	0.00313205	0.00271687	0.00232737		KOR	0.0155367	0.00891245	0.00831942	0.00793289	0.00760895	0.00740003	0.00705702	0.00623411	0.00581529	0.0049952	0.00436923	0.00387754	0.00336448		KOR	0.0155367	0.00894686	0.00843509	0.00816558	0.00792776	0.00757664	0.00730788	0.00655709	0.00612928	0.00530371	0.00463444	0.00411127	0.00362584		KOR	0.0155367	0.00836967	0.00719484
PNG	Developing country	0.131621	0.168319	0.127828	0.092437	0.0666125	0.0509562	0.0369736	0.0285264	0.0226109	0.0151973	0.0106806	0.00768544	0.00558453		PNG	0.131621	0.174546	0.138007	0.103974	0.0806198	0.0648663	0.0520236	0.0393675	0.0317096	0.02113	0.0148995	0.0109687	0.00807308		PNG	0.131621	0.17522	0.139926	0.107024	0.0839976	0.0664143	0.053873	0.0414071	0.0334218	0.022435	0.0158039	0.0116299	0.00870021		PNG	0.131621	0.163916	0.119352
SLB	Developing country	0.155451	0.174624	0.135342	0.100843	0.0748382	0.058691	0.0434668	0.0340831	0.0273461	0.0186977	0.0132599	0.00951853	0.00688208		SLB	0.155451	0.181085	0.146072	0.113429	0.0905752	0.0747126	0.0611598	0.047036	0.0383502	0.0259968	0.0184976	0.0135849	0.00994884		SLB	0.155451	0.181784	0.148102	0.116756	0.0943701	0.0764956	0.0633339	0.049473	0.0404209	0.0276024	0.0196204	0.0144038	0.0107217		SLB	0.155451	0.170056	0.126326
NCL	Developing country	0.0133992	0.00686981	0.00663317	0.0066978	0.00657586	0.00664729	0.00623705	0.00609551	0.00600676	0.0059131	0.0057796	0.00552789	0.00510033		NCL	0.0133992	0.00712398	0.00713634	0.00753372	0.00795864	0.00846187	0.00877583	0.00841204	0.00842389	0.00822143	0.00806257	0.00788945	0.00737312		NCL	0.0133992	0.00715148	0.00723555	0.00775471	0.00829209	0.00866382	0.00908779	0.00884786	0.00887874	0.00872921	0.00855197	0.00836501	0.00794588		NCL	0.0133992	0.00669012	0.00617168
VUT	Developing country	0.179886	0.160733	0.120933	0.085292	0.060334	0.0456932	0.0330065	0.0253799	0.0200586	0.0133689	0.00930993	0.00661684	0.00474911		VUT	0.179886	0.166679	0.130583	0.095937	0.0730211	0.0581665	0.0464416	0.0350252	0.0281302	0.0185878	0.0129874	0.0094436	0.00686538		VUT	0.179886	0.167323	0.132398	0.0987511	0.0760805	0.0595547	0.0480925	0.0368399	0.029649	0.0197358	0.0137757	0.0100129	0.0073987		VUT	0.179886	0.156528	0.112931
FJI	Developing country	0.0602502	0.0413813	0.0383279	0.0362831	0.0328033	0.0301338	0.0253701	0.0220254	0.0191661	0.0146653	0.0112404	0.00850502	0.00633195		FJI	0.0602502	0.0429123	0.0412579	0.0408115	0.0397012	0.0383598	0.0356969	0.0303959	0.0268786	0.0203903	0.0156804	0.0121384	0.00915356		FJI	0.0602502	0.0430779	0.0418315	0.0420086	0.0413646	0.0392753	0.0369658	0.0319707	0.0283299	0.0216496	0.0166322	0.0128701	0.00986463		FJI	0.0602502	0.0402988	0.0356809
REU	Developing country	0.0451546	0.0145789	0.0209925	0.0229618	0.025402	0.026439	0.0276965	0.022966	0.0225993	0.0218954	0.0226176	0.0232643	0.0238041		REU	0.0451546	0.0191137	0.0222362	0.0260867	0.0297703	0.0324541	0.032637	0.0304416	0.0308043	0.0312815	0.0320222	0.0329702	0.0334226		REU	0.0451546	0.0152099	0.0226673	0.02661	0.0300923	0.0335456	0.0347841	0.0329429	0.0325085	0.0330328	0.0343796	0.0348688	0.0355041		REU	0.0451546	0.0135683	0.0154169
LKA	Developing country	0.0302519	0.0352826	0.0296199	0.0255008	0.0215008	0.0189038	0.0155058	0.0132855	0.0115102	0.00901164	0.0072921	0.00591336	0.00476265		LKA	0.0302519	0.036588	0.0319286	0.0286835	0.026022	0.0240642	0.0218174	0.0183345	0.0161419	0.0125296	0.0101725	0.0084396	0.00688496		LKA	0.0302519	0.0367293	0.0323725	0.0295248	0.0271123	0.0246385	0.022593	0.0192844	0.0170135	0.0133034	0.01079	0.00894833	0.0074198		LKA	0.0302519	0.0343597	0.0276126
BGD	Developing country	0.0669479	0.073654	0.062888	0.056662	0.048925	0.0432233	0.0352488	0.0298144	0.0253487	0.0187175	0.0139258	0.0104259	0.0077703		BGD	0.0669479	0.076379	0.0677729	0.0637338	0.059213	0.0550224	0.0495967	0.041145	0.0355491	0.0260243	0.0194266	0.01488	0.0112329		BGD	0.0669479	0.0766739	0.0687152	0.0656032	0.0616939	0.0563355	0.0513597	0.0432768	0.0374686	0.0276317	0.0206058	0.0157769	0.0121055		BGD	0.0669479	0.0717274	0.0586117
BTN	Developing country	0.0632011	0.0390515	0.0279565	0.0207739	0.0157043	0.0127619	0.00993782	0.00825818	0.00702802	0.00537754	0.00430408	0.00352748	0.00289916		BTN	0.0632011	0.0404963	0.0302128	0.0233666	0.0190066	0.0162457	0.013983	0.0113966	0.0098561	0.00747681	0.00600421	0.00503445	0.00419107		BTN	0.0632011	0.0406526	0.0306328	0.024052	0.0198029	0.0166334	0.0144801	0.0119871	0.0103883	0.00793859	0.00636867	0.00533793	0.00451665		BTN	0.0632011	0.03803	0.0261288
		0.0850577	0.0741414	0.0727634	0.0608457	0.0508755	0.0417886	0.0341453	0.0252733	0.0212362	0.0157598	0.0127464	0.010566	0.00888236			0.0850577	0.0882117	0.0784797	0.0698087	0.0618999	0.0540407	0.0447223	0.0353913	0.0303515	0.0228436	0.0180595	0.0151126	0.0127141			0.0850577	0.0769424	0.0797077	0.0714633	0.0625589	0.0547516	0.0467232	0.0375843	0.0319105	0.0240897	0.0193079	0.0160326	0.013616			0.0850577	0.0704828	0.0591681
[truncated: 10 more columns]

## Sheet: Global-level
Year	BaU	EAT	HUS	MED	VEG
2020	0.0318755	0.0318755	0.0318755	0.0318755	0.0318755
2025	0.0294176	0.0288253	0.0303674	0.0295611	0.0280958
2030	0.0256365	0.0237344	0.0268526	0.0272165	0.0225993
2035	0.0238162	0.0216588	0.0250223	0.0257655	0.0173057
2040	0.023098	0.0186641	0.0232777	0.0238034	0.0135042
2045	0.021735	0.016441	0.0219218	0.02228	0.0108138
2050	0.0205311	0.0143611	0.0198783	0.0208869	0.00866356
2055	0.0193268	0.0124789	0.0176322	0.0187376	0.00790953
2060	0.0182203	0.0114166	0.016288	0.0172462	0.00716812
2070	0.0159969	0.00951565	0.0136337	0.0144933	0.00595037
2080	0.0141723	0.0080977	0.0113954	0.0122239	0.00496651
2090	0.0123405	0.00680605	0.00962781	0.0102803	0.00422575
2100	0.0106861	0.00563124	0.00801873	0.00858474	0.00347511
