# Supplementary material for: Transitioning to healthy and sustainable diets has high environmental and affordability trade-offs for developing countries
Source: Research Square preprint supplement (doi:10.21203/rs.3.rs-3278140/v1), 2023-08-29
Supplement: Supplementary file 8 [file d9d43022d274315d4c486b94.xlsx]

## Sheet: EAT
	EAT
	Year	Region	Water	AHEI	Cost	Trade-offs type
	y2030	SEN	0.017652	0.0805753	-0.343896	Quadrant II
	y2030	GMB	0.000264821	0.165648	-0.431699	Quadrant II
	y2030	MRT	0.000203318	0.248226	-0.178726	Quadrant II
	y2030	ESH	0.030303	0.15572	0.0712366	Quadrant I
	y2030	GNB	0.000264819	0.269491	-0.386674	Quadrant II
	y2030	GIN	0.000192194	0.0690773	-0.157988	Quadrant II
	y2030	SLE	3.63044e-05	0.0290417	-0.299065	Quadrant II
	y2030	MLI	0.0084574	0.272501	-0.204243	Quadrant II
	y2030	LBR	-0.000132588	0.252067	-0.774298	Quadrant III
	y2030	CIV	6.17121e-05	0.15169	0.126931	Quadrant I
	y2030	BFA	0.000226412	0.111728	0.153737	Quadrant I
	y2030	GHA	3.05499e-05	0.150846	0.0607346	Quadrant I
	y2030	TGO	2.33958e-05	0.0789886	-0.384937	Quadrant II
	y2030	NER	0.119006	0.00719463	-0.224464	Quadrant II
	y2030	BEN	-0.0425328	0.0127721	-0.161669	Quadrant III
	y2030	DZA	0.00382137	0.0966308	-0.115955	Quadrant II
	y2030	NGA	0.0511127	0.0802408	-0.213025	Quadrant II
	y2030	CMR	0.000106585	0.0114923	0.00258985	Quadrant I
	y2030	GAB	-0.00035478	0.205716	0.2023	Quadrant IV
	y2030	GNQ	0.00117006	0.16913	0.289639	Quadrant I
	y2030	NAM	-0.0270549	0.135636	-0.0291139	Quadrant III
	y2030	AGO	0.0196532	0.226644	-0.329485	Quadrant II
	y2030	COG	-0.000347478	0.178068	-0.586849	Quadrant III
	y2030	COD	0.00177384	0.21093	-1.05169	Quadrant II
	y2030	LBY	0.0100267	0.13881	0.487479	Quadrant I
	y2030	TCD	0.000685027	0.073366	-0.992803	Quadrant II
	y2030	CAF	0.00149677	0.219375	-0.188577	Quadrant II
	y2030	ZAF	0.127897	0.312082	0.182901	Quadrant I
	y2030	BWA	-0.0415158	0.243539	-0.0640014	Quadrant III
	y2030	ZMB	-0.0160823	0.0448944	-0.838289	Quadrant III
	y2030	SDN	0.00817282	0.180792	0.116467	Quadrant I
	y2030	ZWE	0.0993419	0.317896	-0.383609	Quadrant II
	y2030	LSO	-0.0130903	0.317378	-0.505931	Quadrant III
	y2030	BDI	0.0733155	0.206223	-1.32281	Quadrant II
	y2030	RWA	0.171162	0.117298	-0.162965	Quadrant II
	y2030	TZA	0.0657732	0.0376897	-0.237218	Quadrant II
	y2030	UGA	0.158877	0.0944911	-0.113597	Quadrant II
	y2030	MOZ	0.0704037	0.202216	-0.496436	Quadrant II
	y2030	SWZ	0.120057	0.29184	-0.234452	Quadrant II
	y2030	MWI	0.217078	0.130351	-0.666923	Quadrant II
	y2030	ETH	0.0358164	0.197863	-0.580658	Quadrant II
	y2030	EGY	0.0160973	0.0626273	0.182254	Quadrant I
	y2030	KEN	0.0333448	0.185453	-0.307584	Quadrant II
	y2030	ERI	-0.00427512	0.174765	-0.281889	Quadrant III
	y2030	SOM	0.0370871	0.163124	0.0232445	Quadrant I
	y2030	DJI	4.67953e-05	0.194309	-0.0536309	Quadrant II
	y2030	MDG	0.0729326	0.312554	-0.653269	Quadrant II
	y2030	MUS	0	0.118233	0.0991007	Quadrant I
	y2030	ATF	0	0.153617	0.381033	Quadrant I
	y2030	CHN	0.0803241	0.0966633	0.215603	Quadrant I
	y2030	IND	0.0326766	0.0895259	-0.0944064	Quadrant II
	y2030	NPL	-0.466761	0.120619	-0.305021	Quadrant III
	y2030	MNG	0.0151703	0.281947	0.512943	Quadrant I
	y2030	MMR	-0.0806258	0.0227187	0.071145	Quadrant IV
	y2030	LAO	-0.52485	0.135332	0.216414	Quadrant IV
	y2030	THA	0.0585862	0.135517	0.178487	Quadrant I
	y2030	KHM	-0.0409096	0.188567	0.0987905	Quadrant IV
	y2030	VNM	-0.504606	0.147092	0.322828	Quadrant IV
	y2030	RUS	-0.00196046	0.205861	0.282601	Quadrant IV
	y2030	PRK	-0.168738	0.0323433	-0.744535	Quadrant III
	y2030	GRL	6.6566e-06	0.191025	0.391907	Quadrant I
	y2030	ISL	0.000577096	0.304221	0.514804	Quadrant I
	y2030	ESP	0.00233277	0.140944	0.161626	Quadrant I
	y2030	IRL	0.000181555	0.250142	0.334559	Quadrant I
	y2030	PRT	2.50443e-06	0.177645	0.368791	Quadrant I
	y2030	GBR	0.0012364	0.248001	0.172188	Quadrant I
	y2030	FRA	0.0962218	0.233337	0.233758	Quadrant I
	y2030	BEL	0.00164471	0.269695	0.283741	Quadrant I
	y2030	NLD	0.00145275	0.254431	0.173078	Quadrant I
	y2030	NOR	0.00059465	0.228259	0.449438	Quadrant I
	y2030	LUX	0.00203627	0.121122	0.386012	Quadrant I
	y2030	DEU	0.014299	0.324229	0.265763	Quadrant I
	y2030	CHE	0.000856229	0.376546	0.39164	Quadrant I
	y2030	ITA	0.00878861	0.149197	0.165281	Quadrant I
	y2030	DNK	0.0020363	0.226641	0.376651	Quadrant I
	y2030	AUT	0.0552916	0.295546	0.325958	Quadrant I
	y2030	SWE	0.000335995	0.232533	0.102462	Quadrant I
	y2030	CZE	0.0109303	0.325691	0.188989	Quadrant I
	y2030	HRV	0.130236	0.21344	0.104196	Quadrant I
	y2030	SVN	0.137156	0.210479	0.12502	Quadrant I
	y2030	SJM	-6.30143e-08	0.189859	0.387959	Quadrant IV
	y2030	POL	0.00200841	0.339782	0.16407	Quadrant I
	y2030	BIH	0.0010273	0.10929	0.321714	Quadrant I
	y2030	HUN	0.141414	0.347858	0.219462	Quadrant I
	y2030	SVK	0.0569655	0.371906	0.101935	Quadrant I
	y2030	MNE	0.00103347	0.147517	0.35344	Quadrant I
	y2030	SRB	0.00103187	0.242662	0.27034	Quadrant I
	y2030	ALB	0.000823203	0.139469	0.34048	Quadrant I
	y2030	GRC	2.97111e-06	0.0584806	0.122519	Quadrant I
	y2030	MKD	0.000895909	0.132997	0.144769	Quadrant I
	y2030	ROU	0.103752	0.197886	0.127712	Quadrant I
	y2030	LTU	0.0020363	0.298044	0.297236	Quadrant I
	y2030	LVA	0.00198711	0.234843	0.287356	Quadrant I
	y2030	FIN	6.1075e-05	0.266764	0.210993	Quadrant I
	y2030	EST	0.001058	0.219244	0.286072	Quadrant I
	y2030	BGR	0.0716504	0.30036	0.0384769	Quadrant I
	y2030	BLR	-0.00526524	0.252814	0.32923	Quadrant IV
	y2030	TUR	0.000138614	0.0379114	0.0497039	Quadrant I
	y2030	MDA	-0.00736974	0.251986	0.122936	Quadrant IV
	y2030	CYP	5.59247e-09	0.0671586	-0.0788634	Quadrant II
	y2030	IRN	-2.43974e-05	0.0618879	0.00687986	Quadrant IV
	y2030	UKR	-0.00725575	0.243171	0.199783	Quadrant IV
	y2030	GEO	-0.00368356	0.249429	-0.0537213	Quadrant III
	y2030	ARM	-0.0126013	0.226841	0.126336	Quadrant IV
	y2030	AZE	-0.0246411	0.191731	-0.128478	Quadrant III
	y2030	KAZ	-0.00761794	0.230082	0.222204	Quadrant IV
	y2030	TKM	-0.0144822	0.232335	0.260012	Quadrant IV
	y2030	UZB	-0.0285225	0.19372	0.0487914	Quadrant IV
	y2030	AFG	-0.00881462	0.335836	-1.00378	Quadrant III
	y2030	TJK	-0.0243919	0.218023	-0.665856	Quadrant III
	y2030	KGZ	-0.0214368	0.21838	-0.0540765	Quadrant III
	y2030	MEX	0.118398	0.223182	0.0283135	Quadrant I
	y2030	USA	0.0566204	0.272705	0.208996	Quadrant I
	y2030	GTM	0.261888	0.146027	-0.538252	Quadrant II
	y2030	ECU	-0.000391438	0.343063	-0.0121788	Quadrant III
	y2030	SLV	0.159173	0.181222	-0.286911	Quadrant II
	y2030	HND	0.165036	0.26814	-0.377443	Quadrant II
	y2030	BLZ	0.758412	0.0993894	0.134933	Quadrant I
	y2030	NIC	0.0838997	0.189269	-0.464834	Quadrant II
	y2030	CRI	0.125107	0.194103	0.0346625	Quadrant I
	y2030	CUB	-0.0916921	0.218222	-0.0220539	Quadrant III
	y2030	PAN	0.0148406	0.215486	0.121304	Quadrant I
	y2030	PER	0.0131707	0.0825742	-0.0388405	Quadrant II
	y2030	COL	0.0293911	0.348427	-0.0891144	Quadrant II
	y2030	BHS	0.927566	0.164255	0.330633	Quadrant I
	y2030	JAM	0.125089	0.120015	-0.000982916	Quadrant II
	y2030	CHL	0.0633501	0.293696	0.14364	Quadrant I
	y2030	HTI	-0.0514538	0.109761	-0.585639	Quadrant III
	y2030	BRA	-0.00762157	0.20048	0.219718	Quadrant IV
	y2030	ARG	0.0582565	0.408408	0.298692	Quadrant I
	y2030	VEN	0.00409013	0.269608	-0.194227	Quadrant II
	y2030	DOM	0.0542085	0.189664	0.11866	Quadrant I
	y2030	BOL	0.0486876	0.367791	-0.0365245	Quadrant II
	y2030	PRY	0.0131791	0.249522	0.0763726	Quadrant I
	y2030	TTO	3.01807e-05	0.159953	-0.0879343	Quadrant II
	y2030	FLK	0	0.2028	0.377595	NA
	y2030	GUY	-0.0008843	0.0945852	0.206423	Quadrant IV
	y2030	URY	-0.0308042	0.310096	0.223357	Quadrant IV
	y2030	SUR	5.20626e-05	0.202597	-0.136661	Quadrant II
	y2030	GUF	0.00013724	0.168711	0.235542	Quadrant I
	y2030	SGS	0	0.201041	0.357457	NA
	y2030	MAR	3.78458e-05	0.137989	0.154973	Quadrant I
	y2030	TUN	0.118285	0.0634032	0.0925601	Quadrant I
	y2030	SAU	-0.00429516	0.121527	0.245056	Quadrant IV
	y2030	ISR	3.0024e-10	0.0328246	0.45267	Quadrant I
	y2030	JOR	4.86514e-09	0.127088	0.112035	Quadrant I
	y2030	LBN	-2.12595e-10	0.037636	0.172539	Quadrant IV
	y2030	SYR	-6.98806e-11	0.147371	0.212256	Quadrant IV
	y2030	IRQ	4.47769e-05	0.15067	-0.358368	Quadrant II
	y2030	YEM	-0.00269524	0.268732	-1.3249	Quadrant III
	y2030	KWT	1.01931e-09	0.0975757	0.403543	Quadrant I
	y2030	QAT	-4.66032e-06	0.171018	0.5633	Quadrant IV
	y2030	OMN	-0.0131031	0.106383	0.38594	Quadrant IV
	y2030	ARE	1.05726e-09	0.00862757	0.218843	Quadrant I
	y2030	PAK	-0.00391918	0.280139	-0.177431	Quadrant III
	y2030	CAN	0.00178183	0.182703	0.266993	Quadrant I
	y2030	PRI	0.189506	0.179446	0.312673	Quadrant I
	y2030	AUS	0.00146503	0.267374	0.337422	Quadrant I
	y2030	JPN	-0.00744646	0.0709361	0.130001	Quadrant IV
	y2030	NZL	0.000345924	0.224056	0.346495	Quadrant I
	y2030	IDN	-0.0117641	0.143208	-0.119093	Quadrant III
	y2030	MYS	0.000231439	0.123845	0.242063	Quadrant I
	y2030	SGP	0.000271311	0.191587	0.478914	Quadrant I
	y2030	BRN	0.000271307	0.112453	0.219293	Quadrant I
	y2030	PHL	0.00129159	0.250606	0.211848	Quadrant I
	y2030	TLS	-1.11409e-09	0.258551	-0.512923	Quadrant III
	y2030	KOR	-0.165907	0.0998769	0.341487	Quadrant IV
	y2030	PNG	-0.243567	0.174741	-0.192635	Quadrant III
	y2030	SLB	0.000271312	0.133559	-0.0521464	Quadrant II
	y2030	NCL	-0.356018	0.10991	0.397238	Quadrant IV
	y2030	VUT	0.000271281	0.107196	0.145356	Quadrant I
	y2030	FJI	0.00260392	0.0544	0.240335	Quadrant I
	y2030	REU	0.000695768	0.175238	0.38259	Quadrant I
	y2030	LKA	-0.454026	0.0518243	-0.199784	Quadrant III
	y2030	BGD	-0.438479	0.148403	-0.193495	Quadrant III
	y2030	BTN	-0.0791927	0.143663	0.332427	Quadrant IV
	y2040	SEN	0.080098	0.135405	-0.0792254	Quadrant II
	y2040	GMB	0.16464	0.222516	-0.116581	Quadrant II
	y2040	MRT	0.011126	0.390412	0.0816701	Quadrant I
	y2040	ESH	0	0.263028	0.116932	NA
	y2040	GNB	0.16464	0.397695	-0.00378488	Quadrant II
	y2040	GIN	0.114908	0.146859	0.253688	Quadrant I
	y2040	SLE	0.0220511	0.0549517	-0.0268041	Quadrant II
	y2040	MLI	0.123889	0.419165	0.0567506	Quadrant I
	y2040	LBR	0.00449291	0.311736	-0.309745	Quadrant II
	y2040	CIV	0.0271705	0.226212	0.336196	Quadrant I
	y2040	BFA	0.150009	0.20851	0.333474	Quadrant I
	y2040	GHA	0.0354456	0.269177	0.231061	Quadrant I
	y2040	TGO	0.00849548	0.11193	-0.117026	Quadrant II
	y2040	NER	0.0513418	0.105335	-0.00572797	Quadrant II
	y2040	BEN	0.0978169	0.0599445	-0.0129763	Quadrant II
	y2040	DZA	0.000319864	0.198993	-0.0199226	Quadrant II
	y2040	NGA	0.0600615	0.108125	-0.0348731	Quadrant II
	y2040	CMR	0.00501879	0.073871	0.21539	Quadrant I
	y2040	GAB	4.02418e-05	0.314715	0.267189	Quadrant I
	y2040	GNQ	0.00117169	0.304889	0.380469	Quadrant I
	y2040	NAM	-0.0649024	0.37019	0.178574	Quadrant IV
	y2040	AGO	-0.0267663	0.367796	-0.373424	Quadrant III
	y2040	COG	0.000389194	0.279407	-0.067374	Quadrant II
	y2040	COD	-0.00823241	0.321918	-0.453712	Quadrant III
	y2040	LBY	0.000616849	0.244328	0.514701	Quadrant I
	y2040	TCD	0.0235513	0.145807	-0.310916	Quadrant II
	y2040	CAF	4.31754e-05	0.381897	0.168261	Quadrant I
	y2040	ZAF	0.152447	0.524299	0.297301	Quadrant I
	y2040	BWA	-0.0581326	0.41847	0.095318	Quadrant IV
	y2040	ZMB	-0.0340754	0.196056	-0.240245	Quadrant III
	y2040	SDN	0.0562831	0.363808	0.264969	Quadrant I
	y2040	ZWE	-0.071541	0.489871	-0.0539429	Quadrant III
	y2040	LSO	0.00233782	0.547474	0.0269485	Quadrant I
	y2040	BDI	0.0243825	0.312146	-0.569258	Quadrant II
	y2040	RWA	0.046531	0.257573	0.078415	Quadrant I
	y2040	TZA	0.0766433	0.122247	0.0305467	Quadrant I
	y2040	UGA	0.0451577	0.175989	0.130569	Quadrant I
	y2040	MOZ	-0.351603	0.295474	-0.131	Quadrant III
	y2040	SWZ	0.156309	0.47876	-0.0489994	Quadrant II
	y2040	MWI	0.258077	0.236093	-0.226261	Quadrant II
	y2040	ETH	0.0413443	0.352801	-0.0968781	Quadrant II
	y2040	EGY	0.00104629	0.133198	0.282254	Quadrant I
	y2040	KEN	0.0315228	0.353612	0.0115794	Quadrant I
	y2040	ERI	0.00673232	0.302258	-0.264266	Quadrant II
	y2040	SOM	0.000457099	0.268626	0.00305295	Quadrant I
	y2040	DJI	0.00884412	0.350481	0.158225	Quadrant I
	y2040	MDG	0.0529556	0.460388	-0.261427	Quadrant II
	y2040	MUS	0	0.190001	0.134475	NA
	y2040	ATF	0	0.275753	0.370924	NA
	y2040	CHN	0.0782756	0.21102	0.421439	Quadrant I
	y2040	IND	0.0364339	0.130118	-0.025992	Quadrant II
	y2040	NPL	-0.302223	0.224805	-0.18377	Quadrant III
	y2040	MNG	0.0294236	0.681868	0.536058	Quadrant I
	y2040	MMR	0.0502597	0.0942131	0.127531	Quadrant I
	y2040	LAO	-0.34848	0.251147	0.307207	Quadrant IV
	y2040	THA	0.131546	0.219504	0.219032	Quadrant I
	y2040	KHM	0.0712522	0.333028	0.234438	Quadrant I
	y2040	VNM	-0.339888	0.283902	0.354938	Quadrant IV
	y2040	RUS	0.00371113	0.392569	0.459892	Quadrant I
	y2040	PRK	0.0946881	0.132392	-0.889633	Quadrant II
	y2040	GRL	6.98535e-06	0.334911	0.54234	Quadrant I
	y2040	ISL	0.000620476	0.569281	0.637883	Quadrant I
	y2040	ESP	0.00246139	0.247808	0.368178	Quadrant I
	y2040	IRL	0.00395862	0.43926	0.498588	Quadrant I
	y2040	PRT	2.25299e-06	0.311255	0.528999	Quadrant I
	y2040	GBR	0.00304703	0.450778	0.386699	Quadrant I
	y2040	FRA	0.0977358	0.407045	0.432244	Quadrant I
	y2040	BEL	0.00306009	0.501002	0.470072	Quadrant I
	y2040	NLD	0.00264985	0.465599	0.383004	Quadrant I
	y2040	NOR	0.000679727	0.40549	0.585187	Quadrant I
	y2040	LUX	0.00374856	0.272948	0.538327	Quadrant I
	y2040	DEU	0.0163294	0.585752	0.45421	Quadrant I
	y2040	CHE	0.00104395	0.677126	0.542723	Quadrant I
	y2040	ITA	0.00894515	0.270692	0.377622	Quadrant I
	y2040	DNK	0.00374855	0.426835	0.53514	Quadrant I
	y2040	AUT	0.0559398	0.55417	0.49838	Quadrant I
	y2040	SWE	0.00304516	0.42593	0.336295	Quadrant I
	y2040	CZE	0.012885	0.608831	0.40414	Quadrant I
	y2040	HRV	0.13162	0.393767	0.34103	Quadrant I
	y2040	SVN	0.138687	0.385247	0.352868	Quadrant I
	y2040	SJM	5.98143e-08	0.333091	0.538823	Quadrant I
	y2040	POL	0.0037518	0.64139	0.384848	Quadrant I
	y2040	BIH	0.00125042	0.233071	0.523965	Quadrant I
	y2040	HUN	0.14293	0.709353	0.421648	Quadrant I
	y2040	SVK	0.0584734	0.701584	0.342591	Quadrant I
	y2040	MNE	0.00128802	0.345097	0.52786	Quadrant I
	y2040	SRB	0.000971503	0.471794	0.455745	Quadrant I
	y2040	ALB	0.000888088	0.296399	0.520643	Quadrant I
	y2040	GRC	2.84136e-06	0.15528	0.354492	Quadrant I
	y2040	MKD	0.000984164	0.294353	0.391093	Quadrant I
	y2040	ROU	0.104908	0.397901	0.357881	Quadrant I
	y2040	LTU	0.00374855	0.546227	0.485619	Quadrant I
	y2040	LVA	0.00375427	0.447996	0.47792	Quadrant I
	y2040	FIN	0.00370707	0.491361	0.418087	Quadrant I
	y2040	EST	0.00386047	0.420429	0.479245	Quadrant I
	y2040	BGR	0.0724371	0.566455	0.303864	Quadrant I
	y2040	BLR	0.0223104	0.497871	0.495966	Quadrant I
	y2040	TUR	0.000156748	0.118301	0.299631	Quadrant I
	y2040	MDA	0.0273368	0.469967	0.344375	Quadrant I
	y2040	CYP	2.3456e-10	0.164935	0.200376	Quadrant I
	y2040	IRN	0.000118046	0.133064	0.10174	Quadrant I
	y2040	UKR	0.0271214	0.487344	0.42192	Quadrant I
	y2040	GEO	0.01713	0.460021	0.215903	Quadrant I
	y2040	ARM	-0.0222126	0.454803	0.345739	Quadrant IV
	y2040	AZE	-0.0460874	0.35336	0.133081	Quadrant IV
	y2040	KAZ	-0.0124416	0.460778	0.405154	Quadrant IV
	y2040	TKM	-0.0275782	0.440619	0.455863	Quadrant IV
	y2040	UZB	-0.0552714	0.350632	0.318846	Quadrant IV
	y2040	AFG	0.00301836	0.52352	-0.61042	Quadrant II
	y2040	TJK	-0.0462447	0.409575	-0.0301322	Quadrant III
	y2040	KGZ	-0.0406791	0.451464	0.296921	Quadrant IV
	y2040	MEX	0.132291	0.416151	0.176578	Quadrant I
	y2040	USA	0.0435779	0.480518	0.416676	Quadrant I
	y2040	GTM	0.364296	0.324933	-0.251531	Quadrant II
	y2040	ECU	0.183178	0.61177	0.170993	Quadrant I
	y2040	SLV	0.259706	0.348118	-0.029554	Quadrant II
	y2040	HND	0.239171	0.49936	-0.0532006	Quadrant II
	y2040	BLZ	0.816219	0.250532	0.302799	Quadrant I
	y2040	NIC	0.127379	0.381165	-0.113343	Quadrant II
	y2040	CRI	0.172382	0.382483	0.173677	Quadrant I
	y2040	CUB	0.00558466	0.450212	0.115825	Quadrant I
	y2040	PAN	0.0252202	0.355773	0.253631	Quadrant I
	y2040	PER	0.0836292	0.171417	0.151852	Quadrant I
	y2040	COL	0.0871564	0.604174	0.0736482	Quadrant I
	y2040	BHS	0.944249	0.296715	0.411489	Quadrant I
	y2040	JAM	0.231852	0.218393	0.156538	Quadrant I
	y2040	CHL	0.0693915	0.558549	0.265426	Quadrant I
	y2040	HTI	0.0857825	0.267962	-0.0979086	Quadrant II
	y2040	BRA	0.0952779	0.410867	0.329554	Quadrant I
	y2040	ARG	0.158616	0.780855	0.412164	Quadrant I
	y2040	VEN	-0.00984929	0.440484	0.0171659	Quadrant IV
	y2040	DOM	0.11575	0.339457	0.231825	Quadrant I
	y2040	BOL	0.0767161	0.690822	0.190245	Quadrant I
	y2040	PRY	0.0422218	0.491505	0.219977	Quadrant I
	y2040	TTO	9.00549e-05	0.308474	0.0460937	Quadrant I
	y2040	FLK	0	0.349699	0.438952	NA
	y2040	GUY	-0.00354247	0.202578	0.296258	Quadrant IV
	y2040	URY	-0.0178251	0.589257	0.33965	Quadrant IV
	y2040	SUR	-0.225439	0.362138	0.0927705	Quadrant IV
	y2040	GUF	-2.15626	0.286716	0.298289	Quadrant IV
	y2040	SGS	0	0.343494	0.421177	NA
	y2040	MAR	2.43908e-05	0.211407	0.308416	Quadrant I
	y2040	TUN	0.00599578	0.123658	0.247175	Quadrant I
	y2040	SAU	0.0170364	0.202311	0.270944	Quadrant I
	y2040	ISR	2.59723e-10	0.0975764	0.492024	Quadrant I
	y2040	JOR	-1.50583e-09	0.252299	0.254296	Quadrant IV
	y2040	LBN	-1.00213e-09	0.126498	0.332112	Quadrant IV
	y2040	SYR	1.90022e-11	0.276021	0.380018	Quadrant I
	y2040	IRQ	4.10711e-05	0.263828	-0.26952	Quadrant II
	y2040	YEM	0.0100118	0.425117	-0.478443	Quadrant II
	y2040	KWT	-1.73785e-09	0.187085	0.431227	Quadrant IV
	y2040	QAT	-2.58881e-06	0.316446	0.572529	Quadrant IV
	y2040	OMN	0.0525438	0.156557	0.432019	Quadrant I
	y2040	ARE	-3.14624e-09	0.0621183	0.231653	Quadrant IV
	y2040	PAK	0.0146313	0.479274	-0.0470912	Quadrant II
	y2040	CAN	0.00614737	0.361762	0.366191	Quadrant I
	y2040	PRI	0.316424	0.314879	0.389251	Quadrant I
	y2040	AUS	0.0050074	0.488629	0.428197	Quadrant I
	y2040	JPN	0.0145292	0.152962	0.255445	Quadrant I
	y2040	NZL	0.00352472	0.442524	0.432737	Quadrant I
	y2040	IDN	-0.0122949	0.226911	-0.0427586	Quadrant III
	y2040	MYS	-0.0063397	0.227535	0.240481	Quadrant IV
	y2040	SGP	-0.00739328	0.335026	0.472918	Quadrant IV
	y2040	BRN	-0.00739327	0.199971	0.192595	Quadrant IV
	y2040	PHL	0.0360331	0.410764	0.242681	Quadrant I
	y2040	TLS	0.00685365	0.451005	-0.0871047	Quadrant II
	y2040	KOR	0.0952848	0.180122	0.340314	Quadrant I
	y2040	PNG	-0.176077	0.290271	0.100937	Quadrant IV
	y2040	SLB	-0.00739327	0.261541	0.183775	Quadrant IV
	y2040	NCL	-0.0899196	0.218537	0.38782	Quadrant IV
	y2040	VUT	-0.00739328	0.229051	0.306731	Quadrant IV
	y2040	FJI	-0.00219144	0.134197	0.264873	Quadrant IV
	y2040	REU	0.00207449	0.297092	0.39498	Quadrant I
	y2040	LKA	-0.324715	0.124041	-0.067935	Quadrant III
	y2040	BGD	-0.308608	0.229681	-0.057594	Quadrant III
	y2040	BTN	0.051459	0.282164	0.399701	Quadrant I
	y2050	SEN	0.487825	0.158434	-0.110838	Quadrant II
	y2050	GMB	0.173373	0.212997	-0.116536	Quadrant II
	y2050	MRT	0.0854648	0.534948	-0.0516615	Quadrant II
	y2050	ESH	0	0.352792	0.218082	NA
	y2050	GNB	0.173373	0.601385	0.0610814	Quadrant I
	y2050	GIN	0.114978	0.243137	0.236043	Quadrant I
	y2050	SLE	0.020567	0.0688581	0.0622395	Quadrant I
	y2050	MLI	0.513417	0.476068	-0.0281189	Quadrant II
	y2050	LBR	0.00463868	0.369595	-0.154673	Quadrant II
	y2050	CIV	0.0255376	0.279317	0.313452	Quadrant I
	y2050	BFA	0.642237	0.247917	0.349006	Quadrant I
	y2050	GHA	0.0330473	0.337771	0.223049	Quadrant I
	y2050	TGO	-0.0120833	0.189073	-0.0742027	Quadrant III
	y2050	NER	0.291574	0.176352	-0.102681	Quadrant II
	y2050	BEN	0.152323	0.0872501	-0.0307162	Quadrant II
	y2050	DZA	0.0318317	0.284958	0.0961675	Quadrant I
	y2050	NGA	0.400972	0.137377	-0.0328585	Quadrant II
	y2050	CMR	-0.921882	0.125179	0.210478	Quadrant IV
	y2050	GAB	0.00111773	0.406447	0.188985	Quadrant I
	y2050	GNQ	0.00107906	0.429278	0.304275	Quadrant I
	y2050	NAM	-0.150546	0.51508	0.111923	Quadrant IV
	y2050	AGO	-0.932375	0.476567	-0.324787	Quadrant III
	y2050	COG	0.00140373	0.372324	-0.0199755	Quadrant II
	y2050	COD	-0.0094009	0.375609	-0.271684	Quadrant III
	y2050	LBY	-0.00197733	0.345418	0.569565	Quadrant IV
	y2050	TCD	-0.852538	0.18529	-0.215207	Quadrant III
	y2050	CAF	-0.728847	0.554525	0.171375	Quadrant IV
	y2050	ZAF	0.0584356	0.677226	0.202815	Quadrant I
	y2050	BWA	-0.0127417	0.591605	-0.0628521	Quadrant III
	y2050	ZMB	-0.152507	0.236786	-0.133474	Quadrant III
	y2050	SDN	0.0633591	0.593004	0.349959	Quadrant I
	y2050	ZWE	-0.0593937	0.636214	-0.0283211	Quadrant III
	y2050	LSO	-0.000587621	0.747022	0.0801262	Quadrant IV
	y2050	BDI	0.021051	0.359093	-0.338599	Quadrant II
	y2050	RWA	0.0346209	0.391931	0.0613409	Quadrant I
	y2050	TZA	-0.0631776	0.196603	0.0219442	Quadrant IV
	y2050	UGA	0.0271674	0.307755	0.157395	Quadrant I
	y2050	MOZ	-0.459126	0.346285	-0.0387793	Quadrant III
	y2050	SWZ	0.0747945	0.643118	-0.173172	Quadrant II
	y2050	MWI	-0.335428	0.298896	-0.132158	Quadrant III
	y2050	ETH	0.0291203	0.501398	-0.0971568	Quadrant II
	y2050	EGY	-0.00309658	0.173835	0.383345	Quadrant IV
	y2050	KEN	0.00949986	0.540233	-0.0709064	Quadrant II
	y2050	ERI	0.0390745	0.383356	-0.441099	Quadrant II
	y2050	SOM	3.0112e-05	0.362537	-0.245654	Quadrant II
	y2050	DJI	0.0318625	0.515104	0.0155521	Quadrant I
	y2050	MDG	0.0923251	0.53657	-0.211476	Quadrant II
	y2050	MUS	0	0.253871	-0.00128779	NA
	y2050	ATF	0	0.38826	0.392521	NA
	y2050	CHN	0.102129	0.31872	0.561087	Quadrant I
	y2050	IND	-0.0280305	0.190881	0.12206	Quadrant IV
	y2050	NPL	-0.235047	0.300054	-0.00470597	Quadrant III
	y2050	MNG	0.045752	1.06024	0.578513	Quadrant I
	y2050	MMR	0.101532	0.139282	0.215173	Quadrant I
	y2050	LAO	-0.324663	0.305231	0.39293	Quadrant IV
	y2050	THA	0.1727	0.290945	0.279151	Quadrant I
	y2050	KHM	0.117544	0.415492	0.34535	Quadrant I
	y2050	VNM	-0.277316	0.392914	0.402795	Quadrant IV
	y2050	RUS	0.0112751	0.545209	0.609339	Quadrant I
	y2050	PRK	0.205855	0.202396	-0.998326	Quadrant II
	y2050	GRL	1.60165e-06	0.469431	0.636538	Quadrant I
	y2050	ISL	0.000141687	0.738389	0.716635	Quadrant I
	y2050	ESP	0.00307186	0.325907	0.591931	Quadrant I
	y2050	IRL	-0.000329911	0.61073	0.675051	Quadrant IV
	y2050	PRT	1.94497e-06	0.408534	0.698657	Quadrant I
	y2050	GBR	-0.00373426	0.642252	0.606541	Quadrant IV
	y2050	FRA	0.120839	0.556495	0.637229	Quadrant I
	y2050	BEL	-0.00532227	0.695912	0.66145	Quadrant IV
	y2050	NLD	-0.00468294	0.656232	0.605894	Quadrant IV
	y2050	NOR	0.00138168	0.516078	0.675279	Quadrant I
	y2050	LUX	-0.00663711	0.413429	0.702008	Quadrant IV
	y2050	DEU	0.0102111	0.81729	0.64979	Quadrant I
	y2050	CHE	0.0165713	0.950427	0.643069	Quadrant I
	y2050	ITA	0.0111892	0.388683	0.602899	Quadrant I
	y2050	DNK	-0.00663713	0.549555	0.703897	Quadrant IV
	y2050	AUT	0.0666767	0.783787	0.677298	Quadrant I
	y2050	SWE	-0.000785028	0.599134	0.574412	Quadrant IV
	y2050	CZE	0.00561348	0.859352	0.617412	Quadrant I
	y2050	HRV	0.164518	0.570079	0.578678	Quadrant I
	y2050	SVN	0.173334	0.553661	0.58376	Quadrant I
	y2050	SJM	-4.73783e-08	0.466962	0.633683	Quadrant IV
	y2050	POL	-0.00653721	0.900085	0.60369	Quadrant IV
	y2050	BIH	0.0258556	0.354282	0.640476	Quadrant I
	y2050	HUN	0.179114	1.03689	0.630304	Quadrant I
	y2050	SVK	0.0680477	0.988833	0.57685	Quadrant I
	y2050	MNE	0.0262845	0.548644	0.636551	Quadrant I
	y2050	SRB	0.0251106	0.693827	0.578168	Quadrant I
	y2050	ALB	0.0206796	0.458442	0.631795	Quadrant I
	y2050	GRC	2.71407e-06	0.253479	0.590398	Quadrant I
	y2050	MKD	0.0226336	0.458783	0.535939	Quadrant I
	y2050	ROU	0.130785	0.579565	0.590711	Quadrant I
	y2050	LTU	-0.00663713	0.69969	0.667834	Quadrant IV
	y2050	LVA	-0.00646184	0.624549	0.664624	Quadrant IV
	y2050	FIN	6.66664e-05	0.687522	0.628318	Quadrant I
	y2050	EST	-0.0032478	0.615105	0.666429	Quadrant IV
	y2050	BGR	0.0900596	0.794509	0.557478	Quadrant I
	y2050	BLR	0.0152629	0.710064	0.638519	Quadrant I
	y2050	TUR	0.00361913	0.19284	0.462505	Quadrant I
	y2050	MDA	0.017678	0.665305	0.530284	Quadrant I
	y2050	CYP	-2.47356e-09	0.261268	0.485441	Quadrant IV
	y2050	IRN	0.000509807	0.17456	0.23961	Quadrant I
	y2050	UKR	0.017567	0.701937	0.596979	Quadrant I
	y2050	GEO	0.0118079	0.631177	0.439907	Quadrant I
	y2050	ARM	0.114292	0.676356	0.520162	Quadrant I
	y2050	AZE	0.213892	0.459091	0.369181	Quadrant I
	y2050	KAZ	0.0733124	0.652132	0.55351	Quadrant I
	y2050	TKM	0.125729	0.610416	0.590754	Quadrant I
	y2050	UZB	0.232803	0.507777	0.508611	Quadrant I
	y2050	AFG	0.00578274	0.63936	-0.193471	Quadrant II
	y2050	TJK	0.231634	0.637395	0.327135	Quadrant I
	y2050	KGZ	0.186966	0.676885	0.517781	Quadrant I
	y2050	MEX	0.247886	0.612279	0.315114	Quadrant I
	y2050	USA	0.0447501	0.68018	0.573101	Quadrant I
	y2050	GTM	0.347699	0.517963	-0.0042144	Quadrant II
	y2050	ECU	0.204377	0.846133	0.341396	Quadrant I
	y2050	SLV	0.360261	0.540068	0.18404	Quadrant I
	y2050	HND	0.266008	0.760115	0.191967	Quadrant I
	y2050	BLZ	0.79143	0.410807	0.44349	Quadrant I
	y2050	NIC	0.183879	0.609484	0.145449	Quadrant I
	y2050	CRI	0.197411	0.569299	0.310276	Quadrant I
	y2050	CUB	-0.0658439	0.698218	0.266664	Quadrant IV
	y2050	PAN	0.102388	0.486525	0.379513	Quadrant I
	y2050	PER	0.185666	0.249086	0.303393	Quadrant I
	y2050	COL	0.149001	0.848335	0.233945	Quadrant I
	y2050	BHS	0.935078	0.421598	0.499	Quadrant I
	y2050	JAM	0.156616	0.317834	0.314487	Quadrant I
	y2050	CHL	0.0947239	0.80416	0.386626	Quadrant I
	y2050	HTI	0.0880254	0.48141	0.227104	Quadrant I
	y2050	BRA	0.336597	0.620868	0.441013	Quadrant I
	y2050	ARG	0.743766	1.08378	0.521266	Quadrant I
	y2050	VEN	0.392889	0.613425	0.200747	Quadrant I
	y2050	DOM	0.114273	0.484708	0.349696	Quadrant I
	y2050	BOL	0.110861	1.01744	0.368479	Quadrant I
	y2050	PRY	0.152594	0.743781	0.358362	Quadrant I
	y2050	TTO	0.104005	0.448626	0.17632	Quadrant I
	y2050	FLK	0.111111	0.485105	0.511703	Quadrant I
	y2050	GUY	0.0652213	0.271174	0.400282	Quadrant I
	y2050	URY	0.874716	0.83806	0.459481	Quadrant I
	y2050	SUR	-0.228402	0.500776	0.26976	Quadrant IV
	y2050	GUF	-2.16334	0.392965	0.382566	Quadrant IV
	y2050	SGS	1	0.475318	0.49996	Quadrant I
	y2050	MAR	2.22414e-05	0.271236	0.439724	Quadrant I
	y2050	TUN	-0.0207154	0.174009	0.361108	Quadrant IV
	y2050	SAU	0.0753454	0.276068	0.370954	Quadrant I
	y2050	ISR	1.26663e-09	0.161403	0.57083	Quadrant I
	y2050	JOR	1.15243e-09	0.390305	0.411792	Quadrant I
	y2050	LBN	-4.57246e-10	0.205081	0.443858	Quadrant IV
	y2050	SYR	-1.07295e-10	0.411975	0.507293	Quadrant IV
	y2050	IRQ	3.78052e-05	0.331239	-0.0559744	Quadrant II
	y2050	YEM	0.0305398	0.532193	0.00976217	Quadrant I
	y2050	KWT	-1.04472e-09	0.274084	0.516271	Quadrant IV
	y2050	QAT	1.54215e-06	0.450629	0.612876	Quadrant I
	y2050	OMN	0.18727	0.205656	0.488101	Quadrant I
	y2050	ARE	-2.47737e-08	0.129008	0.309059	Quadrant IV
	y2050	PAK	0.0241941	0.693987	0.106743	Quadrant I
	y2050	CAN	0.00197063	0.536343	0.488527	Quadrant I
	y2050	PRI	0.238575	0.445878	0.477497	Quadrant I
	y2050	AUS	0.0420708	0.68477	0.539903	Quadrant I
	y2050	JPN	-0.0288917	0.185406	0.382576	Quadrant IV
	y2050	NZL	0.00223643	0.656073	0.545477	Quadrant I
	y2050	IDN	-0.00358098	0.241333	0.0530937	Quadrant IV
	y2050	MYS	0.00515784	0.273085	0.276075	Quadrant I
	y2050	SGP	0.00598569	0.465193	0.494727	Quadrant I
	y2050	BRN	0.0059857	0.279891	0.213307	Quadrant I
	y2050	PHL	0.0630786	0.492055	0.30935	Quadrant I
	y2050	TLS	0.000504495	0.674021	0.167207	Quadrant I
	y2050	KOR	0.207403	0.211046	0.370882	Quadrant I
	y2050	PNG	-0.171537	0.466347	0.285447	Quadrant IV
	y2050	SLB	0.00598568	0.364642	0.346576	Quadrant I
	y2050	NCL	-0.0178785	0.31773	0.410824	Quadrant IV
	y2050	VUT	0.00598569	0.371076	0.421055	Quadrant I
	y2050	FJI	0.00567667	0.219236	0.335572	Quadrant I
	y2050	REU	-0.0103582	0.408544	0.266989	Quadrant IV
	y2050	LKA	-0.264984	0.115043	0.0622713	Quadrant IV
	y2050	BGD	-0.199119	0.226583	0.0934401	Quadrant IV
	y2050	BTN	0.110194	0.414018	0.452522	Quadrant I
	y2060	SEN	0.549925	0.184817	0.204683	Quadrant I
	y2060	GMB	0.127811	0.2116	0.207555	Quadrant I
	y2060	MRT	0.104921	0.555211	0.193324	Quadrant I
	y2060	ESH	0	0.349981	0.201486	NA
	y2060	GNB	0.153006	0.698155	0.343505	Quadrant I
	y2060	GIN	0.115737	0.267807	0.427474	Quadrant I
	y2060	SLE	0.202916	0.0967907	0.37228	Quadrant I
	y2060	MLI	0.563649	0.446099	0.248541	Quadrant I
	y2060	LBR	0.214348	0.376325	0.23842	Quadrant I
	y2060	CIV	-0.0216979	0.294574	0.481629	Quadrant IV
	y2060	BFA	0.670273	0.232287	0.542573	Quadrant I
	y2060	GHA	-0.00128772	0.346796	0.432395	Quadrant IV
	y2060	TGO	-0.0883212	0.221364	0.266917	Quadrant IV
	y2060	NER	0.35014	0.18188	0.207944	Quadrant I
	y2060	BEN	0.142943	0.0935505	0.26725	Quadrant I
	y2060	DZA	0.0322124	0.284738	0.144262	Quadrant I
	y2060	NGA	0.456192	0.150488	0.265672	Quadrant I
	y2060	CMR	0.0877692	0.143975	0.421309	Quadrant I
	y2060	GAB	0.00278695	0.410682	0.364643	Quadrant I
	y2060	GNQ	0.0379511	0.43462	0.450806	Quadrant I
	y2060	NAM	0.0181705	0.51404	0.315236	Quadrant I
	y2060	AGO	-0.611113	0.458403	0.131589	Quadrant IV
	y2060	COG	0.110416	0.39111	0.262449	Quadrant I
	y2060	COD	0.00791027	0.369065	0.174842	Quadrant I
	y2060	LBY	0.000932399	0.342845	0.564268	Quadrant I
	y2060	TCD	0.257972	0.209737	0.176299	Quadrant I
	y2060	CAF	-0.0107114	0.581338	0.414057	Quadrant IV
	y2060	ZAF	0.0536929	0.6684	0.368346	Quadrant I
	y2060	BWA	-0.00901141	0.590072	0.14819	Quadrant IV
	y2060	ZMB	-0.0745563	0.254542	0.222675	Quadrant IV
	y2060	SDN	0.138247	0.652854	0.415615	Quadrant I
	y2060	ZWE	0.0854317	0.689017	0.303516	Quadrant I
	y2060	LSO	0.000920385	0.776812	0.35291	Quadrant I
	y2060	BDI	0.000735772	0.34718	0.148184	Quadrant I
	y2060	RWA	-0.000749421	0.395013	0.326078	Quadrant IV
	y2060	TZA	-0.0452115	0.220274	0.301142	Quadrant IV
	y2060	UGA	0.00123855	0.363092	0.410134	Quadrant I
	y2060	MOZ	-0.0956067	0.377522	0.288566	Quadrant IV
	y2060	SWZ	0.0427118	0.645778	0.105207	Quadrant I
	y2060	MWI	-0.0253684	0.314456	0.251281	Quadrant IV
	y2060	ETH	0.0379338	0.546755	0.220837	Quadrant I
	y2060	EGY	-0.0057706	0.166377	0.396993	Quadrant IV
	y2060	KEN	0.0163377	0.575788	0.210434	Quadrant I
	y2060	ERI	0.0477235	0.368848	-0.0702397	Quadrant II
	y2060	SOM	4.65427e-05	0.366843	-0.0793976	Quadrant II
	y2060	DJI	0.0410222	0.528584	0.223034	Quadrant I
	y2060	MDG	0.0378701	0.508392	0.175412	Quadrant I
	y2060	MUS	0	0.248937	0.201702	NA
	y2060	ATF	0	0.38334	0.402681	NA
	y2060	CHN	0.167575	0.322852	0.536309	Quadrant I
	y2060	IND	-0.0139011	0.204329	0.221213	Quadrant IV
	y2060	NPL	-0.189177	0.298393	0.116291	Quadrant IV
	y2060	MNG	0.0328365	1.0788	0.605994	Quadrant I
	y2060	MMR	0.197243	0.162405	0.274071	Quadrant I
	y2060	LAO	-0.206228	0.316186	0.442823	Quadrant IV
	y2060	THA	0.19715	0.301105	0.310769	Quadrant I
	y2060	KHM	0.209417	0.435841	0.411866	Quadrant I
	y2060	VNM	-0.202305	0.400228	0.436019	Quadrant IV
	y2060	RUS	0.00395415	0.541395	0.615794	Quadrant I
	y2060	PRK	-0.210258	0.210305	-1.20023	Quadrant III
	y2060	GRL	1.87774e-06	0.462255	0.609079	Quadrant I
	y2060	ISL	0.000168219	0.734192	0.69836	Quadrant I
	y2060	ESP	0.00450703	0.329017	0.588753	Quadrant I
	y2060	IRL	-0.00025756	0.600851	0.668534	Quadrant IV
	y2060	PRT	1.83885e-06	0.407038	0.695533	Quadrant I
	y2060	GBR	-0.00317638	0.640613	0.601751	Quadrant IV
	y2060	FRA	0.122949	0.556502	0.634147	Quadrant I
	y2060	BEL	-0.00451786	0.688107	0.657112	Quadrant IV
	y2060	NLD	-0.00399379	0.650106	0.599842	Quadrant IV
	y2060	NOR	0.000393073	0.510537	0.652697	Quadrant I
	y2060	LUX	-0.00558913	0.414116	0.694561	Quadrant IV
	y2060	DEU	0.0130896	0.813201	0.644661	Quadrant I
	y2060	CHE	0.00173207	0.949008	0.619627	Quadrant I
	y2060	ITA	0.0116936	0.386659	0.599303	Quadrant I
	y2060	DNK	-0.0055891	0.544896	0.699061	Quadrant IV
	y2060	AUT	0.0729457	0.777218	0.671505	Quadrant I
	y2060	SWE	-0.0007092	0.596292	0.568429	Quadrant IV
	y2060	CZE	0.00556764	0.85834	0.613011	Quadrant I
	y2060	HRV	0.199627	0.568183	0.574391	Quadrant I
	y2060	SVN	0.257177	0.551892	0.580704	Quadrant I
	y2060	SJM	-1.19983e-08	0.46049	0.606208	Quadrant IV
	y2060	POL	-0.00550213	0.899609	0.59816	Quadrant IV
	y2060	BIH	0.00246221	0.359377	0.625096	Quadrant I
	y2060	HUN	0.171828	1.0486	0.625839	Quadrant I
	y2060	SVK	0.0653664	0.978699	0.569753	Quadrant I
	y2060	MNE	0.00259473	0.558148	0.619031	Quadrant I
	y2060	SRB	0.00147169	0.698204	0.554116	Quadrant I
	y2060	ALB	0.00158049	0.463266	0.613954	Quadrant I
	y2060	GRC	2.62543e-06	0.257267	0.589221	Quadrant I
	y2060	MKD	0.00185996	0.46375	0.513086	Quadrant I
	y2060	ROU	0.127881	0.583394	0.589654	Quadrant I
	y2060	LTU	-0.0055891	0.70055	0.663124	Quadrant IV
	y2060	LVA	-0.00543606	0.622496	0.662075	Quadrant IV
	y2060	FIN	4.63907e-05	0.693482	0.624702	Quadrant I
	y2060	EST	-0.0026843	0.617955	0.664654	Quadrant IV
	y2060	BGR	0.0930117	0.794485	0.556711	Quadrant I
	y2060	BLR	0.0144164	0.708928	0.644551	Quadrant I
	y2060	TUR	0.000305074	0.194997	0.434741	Quadrant I
	y2060	MDA	0.0156494	0.671345	0.540332	Quadrant I
	y2060	CYP	7.42229e-09	0.261781	0.478833	Quadrant I
	y2060	IRN	0.000450549	0.170096	0.247185	Quadrant I
	y2060	UKR	0.0155758	0.708768	0.610178	Quadrant I
	y2060	GEO	0.011219	0.633079	0.453908	Quadrant I
	y2060	ARM	-0.000351631	0.682342	0.526179	Quadrant IV
	y2060	AZE	-0.00992504	0.456629	0.396241	Quadrant IV
	y2060	KAZ	0.00638216	0.64284	0.551907	Quadrant I
	y2060	TKM	-0.00775052	0.596402	0.590737	Quadrant IV
	y2060	UZB	-0.0180233	0.513379	0.522114	Quadrant IV
	y2060	AFG	-0.0454853	0.635583	0.0539128	Quadrant IV
	y2060	TJK	-0.00979712	0.674413	0.377491	Quadrant IV
	y2060	KGZ	-0.00937343	0.706124	0.544474	Quadrant IV
	y2060	MEX	0.192118	0.62347	0.309604	Quadrant I
	y2060	USA	0.048145	0.674348	0.56285	Quadrant I
	y2060	GTM	0.327441	0.550838	0.0283518	Quadrant I
	y2060	ECU	0.229469	0.855692	0.348256	Quadrant I
	y2060	SLV	0.336818	0.565182	0.201516	Quadrant I
	y2060	HND	0.239754	0.806916	0.227014	Quadrant I
	y2060	BLZ	0.788918	0.433167	0.452006	Quadrant I
	y2060	NIC	0.154499	0.649363	0.184841	Quadrant I
	y2060	CRI	0.126597	0.575998	0.296928	Quadrant I
	y2060	CUB	-0.103893	0.725837	0.264171	Quadrant IV
	y2060	PAN	-0.00702526	0.482106	0.363884	Quadrant IV
	y2060	PER	0.188988	0.258496	0.29836	Quadrant I
	y2060	COL	0.0964833	0.85661	0.225728	Quadrant I
	y2060	BHS	0.933697	0.418365	0.481309	Quadrant I
	y2060	JAM	0.153893	0.334624	0.322214	Quadrant I
	y2060	CHL	0.0985458	0.810139	0.372269	Quadrant I
	y2060	HTI	0.071324	0.541026	0.303051	Quadrant I
	y2060	BRA	0.330148	0.630131	0.431421	Quadrant I
	y2060	ARG	0.77205	1.07874	0.514208	Quadrant I
	y2060	VEN	0.381424	0.623749	0.20227	Quadrant I
	y2060	DOM	0.0630919	0.485281	0.333191	Quadrant I
	y2060	BOL	0.157573	1.05686	0.38289	Quadrant I
	y2060	PRY	0.138092	0.766803	0.356821	Quadrant I
	y2060	TTO	0.0996027	0.449006	0.150437	Quadrant I
	y2060	FLK	0.125	0.478439	0.49057	Quadrant I
	y2060	GUY	0.0608555	0.279677	0.383973	Quadrant I
	y2060	URY	0.873649	0.836052	0.449695	Quadrant I
	y2060	SUR	-0.229094	0.504807	0.271003	Quadrant IV
	y2060	GUF	-2.17186	0.383384	0.343173	Quadrant IV
	y2060	SGS	1	0.468849	0.477989	Quadrant I
	y2060	MAR	2.1441e-05	0.260405	0.458967	Quadrant I
	y2060	TUN	-0.0365136	0.173713	0.375419	Quadrant IV
	y2060	SAU	0.0571664	0.269725	0.34167	Quadrant I
	y2060	ISR	-6.08007e-10	0.160321	0.561788	Quadrant IV
	y2060	JOR	-9.10463e-11	0.400657	0.424722	Quadrant IV
	y2060	LBN	1.07708e-10	0.207014	0.454985	Quadrant I
	y2060	SYR	1.08218e-10	0.424491	0.524964	Quadrant I
	y2060	IRQ	3.45727e-05	0.325426	-0.063381	Quadrant II
	y2060	YEM	0.020846	0.526528	0.167353	Quadrant I
	y2060	KWT	-3.83495e-10	0.269461	0.494073	Quadrant IV
	y2060	QAT	1.56807e-06	0.445924	0.604129	Quadrant I
	y2060	OMN	0.154931	0.201615	0.484829	Quadrant I
	y2060	ARE	-4.1369e-09	0.123628	0.278563	Quadrant IV
	y2060	PAK	0.00957953	0.731835	0.196502	Quadrant I
	y2060	CAN	-0.000998372	0.529365	0.500897	Quadrant IV
	y2060	PRI	0.234003	0.444164	0.458224	Quadrant I
	y2060	AUS	0.00695144	0.67531	0.552803	Quadrant I
	y2060	JPN	-0.118934	0.186996	0.393135	Quadrant IV
	y2060	NZL	0.00151137	0.650676	0.559483	Quadrant I
	y2060	IDN	0.010209	0.24144	0.105803	Quadrant I
	y2060	MYS	0.0246459	0.276224	0.294606	Quadrant I
	y2060	SGP	0.0284616	0.458801	0.499786	Quadrant I
	y2060	BRN	0.0284616	0.276574	0.222351	Quadrant I
	y2060	PHL	0.0856914	0.502689	0.356917	Quadrant I
	y2060	TLS	-0.00155027	0.723711	0.289748	Quadrant IV
	y2060	KOR	-0.215243	0.209606	0.381556	Quadrant IV
	y2060	PNG	-0.121263	0.50695	0.374822	Quadrant IV
	y2060	SLB	0.0284616	0.408597	0.430448	Quadrant I
	y2060	NCL	0.184666	0.310339	0.418894	Quadrant I
	y2060	VUT	0.0284616	0.425544	0.480879	Quadrant I
	y2060	FJI	0.0210902	0.23635	0.385998	Quadrant I
	y2060	REU	-0.00726242	0.401312	0.39258	Quadrant IV
	y2060	LKA	-0.167919	0.125186	0.134911	Quadrant IV
	y2060	BGD	-0.113836	0.220767	0.185174	Quadrant IV
	y2060	BTN	-0.0702153	0.419153	0.478563	Quadrant IV
	y2070	SEN	0.614193	0.184817	0.321001	Quadrant I
	y2070	GMB	0.062295	0.2116	0.324808	Quadrant I
	y2070	MRT	0.200437	0.555211	0.288628	Quadrant I
	y2070	ESH	0.0277778	0.349981	0.14311	Quadrant I
	y2070	GNB	0.130009	0.698155	0.437287	Quadrant I
	y2070	GIN	0.117062	0.267807	0.487595	Quadrant I
	y2070	SLE	0.32559	0.0967907	0.485489	Quadrant I
	y2070	MLI	0.781816	0.446099	0.358756	Quadrant I
	y2070	LBR	0.348337	0.376325	0.376241	Quadrant I
	y2070	CIV	-0.0809845	0.294574	0.53399	Quadrant IV
	y2070	BFA	0.824263	0.232287	0.614172	Quadrant I
	y2070	GHA	-0.0452905	0.346796	0.505388	Quadrant IV
	y2070	TGO	-0.157132	0.221364	0.398336	Quadrant IV
	y2070	NER	0.328756	0.18188	0.345996	Quadrant I
	y2070	BEN	0.146404	0.0935505	0.380715	Quadrant I
	y2070	DZA	0.0302728	0.284738	0.14331	Quadrant I
	y2070	NGA	0.402043	0.150488	0.373216	Quadrant I
	y2070	CMR	0.0847146	0.143975	0.495036	Quadrant I
	y2070	GAB	0.00249741	0.410682	0.418728	Quadrant I
	y2070	GNQ	0.073176	0.43462	0.494354	Quadrant I
	y2070	NAM	-0.0570837	0.51404	0.382102	Quadrant IV
	y2070	AGO	-0.359933	0.458403	0.30074	Quadrant IV
	y2070	COG	0.218851	0.39111	0.352694	Quadrant I
	y2070	COD	0.00316649	0.369065	0.334007	Quadrant I
	y2070	LBY	0.00350967	0.342845	0.532431	Quadrant I
	y2070	TCD	0.584368	0.209737	0.321256	Quadrant I
	y2070	CAF	-0.0201242	0.581338	0.510118	Quadrant IV
	y2070	ZAF	0.0208171	0.6684	0.419141	Quadrant I
	y2070	BWA	-0.00765855	0.590072	0.210127	Quadrant IV
	y2070	ZMB	-0.0309573	0.254542	0.351574	Quadrant IV
	y2070	SDN	0.13589	0.652854	0.45163	Quadrant I
	y2070	ZWE	-0.0352664	0.689017	0.432657	Quadrant IV
	y2070	LSO	-0.000435659	0.776812	0.450483	Quadrant IV
	y2070	BDI	-0.00166177	0.34718	0.324237	Quadrant IV
	y2070	RWA	-0.00406062	0.395013	0.424044	Quadrant IV
	y2070	TZA	-0.0335312	0.220274	0.406474	Quadrant IV
	y2070	UGA	-0.00815256	0.363092	0.503892	Quadrant IV
	y2070	MOZ	-0.0960341	0.377522	0.401486	Quadrant IV
	y2070	SWZ	0.0253263	0.645778	0.208558	Quadrant I
	y2070	MWI	-0.0654867	0.314456	0.399695	Quadrant IV
	y2070	ETH	0.0274859	0.546755	0.34384	Quadrant I
	y2070	EGY	0.00102461	0.166377	0.37235	Quadrant I
	y2070	KEN	-0.108328	0.575788	0.319153	Quadrant IV
	y2070	ERI	0.0176039	0.368848	0.114415	Quadrant I
	y2070	SOM	-0.0193471	0.366843	-0.0665991	Quadrant III
	y2070	DJI	0.0620754	0.528584	0.29726	Quadrant I
	y2070	MDG	0.0158876	0.508392	0.322202	Quadrant I
	y2070	MUS	0	0.248937	0.263511	NA
	y2070	ATF	0	0.38334	0.404382	NA
	y2070	CHN	0.269532	0.322852	0.540351	Quadrant I
	y2070	IND	0.0164553	0.204329	0.289867	Quadrant I
	y2070	NPL	-0.108863	0.298393	0.202562	Quadrant IV
	y2070	MNG	0.147207	1.0788	0.612034	Quadrant I
	y2070	MMR	0.159781	0.162405	0.318613	Quadrant I
	y2070	LAO	-0.126918	0.316186	0.478636	Quadrant IV
	y2070	THA	0.166108	0.301105	0.330613	Quadrant I
	y2070	KHM	0.170935	0.435841	0.45466	Quadrant I
	y2070	VNM	-0.114358	0.400228	0.458372	Quadrant IV
	y2070	RUS	0.00231599	0.541395	0.604362	Quadrant I
	y2070	PRK	-0.197717	0.210305	-1.38543	Quadrant III
	y2070	GRL	1.84356e-06	0.462255	0.575768	Quadrant I
	y2070	ISL	0.00016977	0.734192	0.677156	Quadrant I
	y2070	ESP	0.0138278	0.329017	0.540962	Quadrant I
	y2070	IRL	0.00361965	0.600851	0.625671	Quadrant I
	y2070	PRT	1.68771e-06	0.407038	0.659934	Quadrant I
	y2070	GBR	-0.000700816	0.640613	0.554509	Quadrant IV
	y2070	FRA	0.119147	0.556502	0.590718	Quadrant I
	y2070	BEL	-0.00228398	0.688107	0.615062	Quadrant IV
	y2070	NLD	-0.00208481	0.650106	0.548467	Quadrant IV
	y2070	NOR	0.0338312	0.510537	0.627337	Quadrant I
	y2070	LUX	-0.00286762	0.414116	0.655065	Quadrant IV
	y2070	DEU	0.0286545	0.813201	0.601904	Quadrant I
	y2070	CHE	0.286212	0.949008	0.594318	Quadrant I
	y2070	ITA	0.0120893	0.386659	0.551135	Quadrant I
	y2070	DNK	-0.00286762	0.544896	0.662066	Quadrant IV
	y2070	AUT	0.1098	0.777218	0.631364	Quadrant I
	y2070	SWE	0.00222912	0.596292	0.517171	Quadrant I
	y2070	CZE	0.00133818	0.85834	0.568078	Quadrant I
	y2070	HRV	0.368116	0.568183	0.523714	Quadrant I
	y2070	SVN	0.558758	0.551892	0.530702	Quadrant I
	y2070	SJM	1.73266e-08	0.46049	0.573801	Quadrant I
	y2070	POL	-0.00275674	0.899609	0.552482	Quadrant IV
	y2070	BIH	0.358573	0.359377	0.604529	Quadrant I
	y2070	HUN	0.0839936	1.0486	0.581194	Quadrant I
	y2070	SVK	0.0416631	0.978699	0.518307	Quadrant I
	y2070	MNE	0.360631	0.558148	0.599349	Quadrant I
	y2070	SRB	0.3594	0.698204	0.525844	Quadrant I
	y2070	ALB	0.328077	0.463266	0.595458	Quadrant I
	y2070	GRC	2.56412e-06	0.257267	0.541593	Quadrant I
	y2070	MKD	0.341466	0.46375	0.489208	Quadrant I
	y2070	ROU	0.0832057	0.583394	0.544038	Quadrant I
	y2070	LTU	-0.00286762	0.70055	0.626914	Quadrant IV
	y2070	LVA	-0.0026723	0.622496	0.624	Quadrant IV
	y2070	FIN	0.00373461	0.693482	0.581334	Quadrant I
	y2070	EST	0.000741797	0.617955	0.626282	Quadrant I
	y2070	BGR	0.0969796	0.794485	0.504343	Quadrant I
	y2070	BLR	0.0112552	0.708928	0.634367	Quadrant I
	y2070	TUR	0.103903	0.194997	0.40416	Quadrant I
	y2070	MDA	0.0130069	0.671345	0.531695	Quadrant I
	y2070	CYP	1.28865e-08	0.261781	0.419495	Quadrant I
	y2070	IRN	0.000423091	0.170096	0.193002	Quadrant I
	y2070	UKR	0.0129326	0.708768	0.603239	Quadrant I
	y2070	GEO	0.00875484	0.633079	0.443068	Quadrant I
	y2070	ARM	-0.00781818	0.682342	0.51371	Quadrant IV
	y2070	AZE	-0.0205768	0.456629	0.398271	Quadrant IV
	y2070	KAZ	-0.00243426	0.64284	0.533395	Quadrant IV
	y2070	TKM	-0.012995	0.596402	0.574085	Quadrant IV
	y2070	UZB	-0.0277632	0.513379	0.516233	Quadrant IV
	y2070	AFG	-0.0101479	0.635583	0.191164	Quadrant IV
	y2070	TJK	-0.0195466	0.674413	0.384873	Quadrant IV
	y2070	KGZ	-0.0179856	0.706124	0.545389	Quadrant IV
	y2070	MEX	0.237325	0.62347	0.306657	Quadrant I
	y2070	USA	0.0563897	0.674348	0.556857	Quadrant I
	y2070	GTM	0.352572	0.550838	0.0534646	Quadrant I
	y2070	ECU	0.058366	0.855692	0.353156	Quadrant I
	y2070	SLV	0.478265	0.565182	0.21534	Quadrant I
	y2070	HND	0.320306	0.806916	0.252173	Quadrant I
	y2070	BLZ	0.763166	0.433167	0.459287	Quadrant I
	y2070	NIC	0.207414	0.649363	0.207903	Quadrant I
	y2070	CRI	0.0979713	0.575998	0.290468	Quadrant I
	y2070	CUB	-0.206872	0.725837	0.268696	Quadrant IV
	y2070	PAN	-0.0222386	0.482106	0.34995	Quadrant IV
	y2070	PER	0.139509	0.258496	0.294966	Quadrant I
	y2070	COL	0.0711559	0.85661	0.221717	Quadrant I
	y2070	BHS	0.925238	0.418365	0.471857	Quadrant I
	y2070	JAM	0.0864119	0.334624	0.331468	Quadrant I
	y2070	CHL	0.0398636	0.810139	0.362821	Quadrant I
	y2070	HTI	0.154293	0.541026	0.349409	Quadrant I
	y2070	BRA	0.24038	0.630131	0.424325	Quadrant I
	y2070	ARG	0.756909	1.07874	0.507195	Quadrant I
	y2070	VEN	0.378362	0.623749	0.202037	Quadrant I
	y2070	DOM	0.0483766	0.485281	0.322183	Quadrant I
	y2070	BOL	0.167635	1.05686	0.390061	Quadrant I
	y2070	PRY	0.140508	0.766803	0.358221	Quadrant I
	y2070	TTO	0.0972053	0.449006	0.128092	Quadrant I
	y2070	FLK	0	0.478439	0.476616	NA
	y2070	GUY	0.0551737	0.279677	0.378396	Quadrant I
	y2070	URY	0.880504	0.836052	0.440076	Quadrant I
	y2070	SUR	-0.22988	0.504807	0.271206	Quadrant IV
	y2070	GUF	-2.17837	0.383384	0.314907	Quadrant IV
	y2070	SGS	0	0.468849	0.463284	NA
	y2070	MAR	3.845e-05	0.260405	0.430853	Quadrant I
	y2070	TUN	0.00584588	0.173713	0.346433	Quadrant I
	y2070	SAU	0.0535198	0.269725	0.256662	Quadrant I
	y2070	ISR	-1.401e-09	0.160321	0.51537	Quadrant IV
	y2070	JOR	-4.88033e-10	0.400657	0.380249	Quadrant IV
	y2070	LBN	5.11185e-10	0.207014	0.422056	Quadrant I
	y2070	SYR	6.01518e-06	0.424491	0.505452	Quadrant I
	y2070	IRQ	9.32598e-05	0.325426	-0.156441	Quadrant II
	y2070	YEM	0.0192454	0.526528	0.194912	Quadrant I
	y2070	KWT	-1.15172e-09	0.269461	0.421157	Quadrant IV
	y2070	QAT	-1.29858e-06	0.445924	0.56959	Quadrant IV
	y2070	OMN	0.149605	0.201615	0.446131	Quadrant I
	y2070	ARE	-1.87576e-08	0.123628	0.189709	Quadrant IV
	y2070	PAK	0.0114956	0.731835	0.252407	Quadrant I
	y2070	CAN	-0.00132066	0.529365	0.471308	Quadrant IV
	y2070	PRI	0.15735	0.444164	0.446085	Quadrant I
	y2070	AUS	0.000336199	0.67531	0.526958	Quadrant I
	y2070	JPN	-0.136641	0.186996	0.388475	Quadrant IV
	y2070	NZL	-0.00058002	0.650676	0.534437	Quadrant IV
	y2070	IDN	0.0714278	0.24144	0.141371	Quadrant I
	y2070	MYS	0.0996008	0.276224	0.30495	Quadrant I
	y2070	SGP	0.113058	0.458801	0.499365	Quadrant I
	y2070	BRN	0.113058	0.276574	0.226039	Quadrant I
	y2070	PHL	0.119839	0.502689	0.390129	Quadrant I
	y2070	TLS	0.0471174	0.723711	0.355603	Quadrant I
	y2070	KOR	-0.20381	0.209606	0.386846	Quadrant IV
	y2070	PNG	-0.0452834	0.50695	0.421518	Quadrant IV
	y2070	SLB	0.113058	0.408597	0.477528	Quadrant I
	y2070	NCL	0.158514	0.310339	0.418541	Quadrant I
	y2070	VUT	0.113058	0.425544	0.511306	Quadrant I
	y2070	FJI	0.0920549	0.23635	0.414117	Quadrant I
	y2070	REU	-0.00676488	0.401312	0.419787	Quadrant IV
	y2070	LKA	-0.0822926	0.125186	0.173377	Quadrant IV
	y2070	BGD	-0.0401315	0.220767	0.250254	Quadrant IV
	y2070	BTN	-0.0369862	0.419153	0.490844	Quadrant IV
	y2080	SEN	0.605958	0.205732	0.374998	Quadrant I
	y2080	GMB	0.0562763	0.226637	0.376255	Quadrant I
	y2080	MRT	0.190143	0.568921	0.334755	Quadrant I
	y2080	ESH	0	0.347182	0.141825	NA
	y2080	GNB	0.124387	0.752855	0.479422	Quadrant I
	y2080	GIN	0.126923	0.280013	0.510352	Quadrant I
	y2080	SLE	0.489747	0.121848	0.534703	Quadrant I
	y2080	MLI	0.770753	0.425873	0.418666	Quadrant I
	y2080	LBR	0.519099	0.385339	0.438924	Quadrant I
	y2080	CIV	-0.221782	0.301073	0.551771	Quadrant IV
	y2080	BFA	0.806984	0.229011	0.646328	Quadrant I
	y2080	GHA	-0.121254	0.353125	0.534486	Quadrant IV
	y2080	TGO	-0.384148	0.255056	0.463139	Quadrant IV
	y2080	NER	0.323811	0.19848	0.42295	Quadrant I
	y2080	BEN	0.0474444	0.102094	0.437208	Quadrant I
	y2080	DZA	0.0280008	0.284442	0.173518	Quadrant I
	y2080	NGA	0.346259	0.160756	0.418801	Quadrant I
	y2080	CMR	0.147572	0.157177	0.524469	Quadrant I
	y2080	GAB	0.00260379	0.411852	0.43475	Quadrant I
	y2080	GNQ	0.150544	0.436281	0.506356	Quadrant I
	y2080	NAM	-0.0539754	0.507389	0.406222	Quadrant IV
	y2080	AGO	-0.210541	0.445802	0.378703	Quadrant IV
	y2080	COG	0.38838	0.400883	0.385701	Quadrant I
	y2080	COD	0.0100286	0.393895	0.407769	Quadrant I
	y2080	LBY	0.00241012	0.340516	0.533208	Quadrant I
	y2080	TCD	0.629171	0.24117	0.39199	Quadrant I
	y2080	CAF	0.280749	0.584567	0.55883	Quadrant I
	y2080	ZAF	0.0224039	0.658278	0.434988	Quadrant I
	y2080	BWA	-0.00752256	0.583926	0.229571	Quadrant IV
	y2080	ZMB	-0.0180997	0.28982	0.409468	Quadrant IV
	y2080	SDN	0.124771	0.702267	0.487402	Quadrant I
	y2080	ZWE	-0.0364241	0.762126	0.495521	Quadrant IV
	y2080	LSO	-9.26693e-05	0.796181	0.496029	Quadrant IV
	y2080	BDI	-0.0732271	0.365485	0.403501	Quadrant IV
	y2080	RWA	-0.117547	0.417002	0.471398	Quadrant IV
	y2080	TZA	-0.0179701	0.246467	0.455311	Quadrant IV
	y2080	UGA	-0.0528786	0.410089	0.546535	Quadrant IV
	y2080	MOZ	-0.0805758	0.411362	0.455138	Quadrant IV
	y2080	SWZ	0.0233512	0.648521	0.255662	Quadrant I
	y2080	MWI	-0.0113034	0.37399	0.471542	Quadrant IV
	y2080	ETH	0.0126168	0.593755	0.407057	Quadrant I
	y2080	EGY	0.000839349	0.159614	0.384876	Quadrant I
	y2080	KEN	-0.116158	0.605737	0.37584	Quadrant IV
	y2080	ERI	0.00908264	0.350749	0.24237	Quadrant I
	y2080	SOM	-0.017481	0.369721	-0.0649922	Quadrant III
	y2080	DJI	0.0656522	0.53567	0.328805	Quadrant I
	y2080	MDG	0.0402307	0.530247	0.39515	Quadrant I
	y2080	MUS	0	0.244016	0.284513	NA
	y2080	ATF	0	0.378454	0.416201	NA
	y2080	CHN	0.0856261	0.326249	0.54653	Quadrant I
	y2080	IND	0.0285002	0.214236	0.352604	Quadrant I
	y2080	NPL	-0.107508	0.29674	0.289248	Quadrant IV
	y2080	MNG	0.136108	1.09423	0.629594	Quadrant I
	y2080	MMR	0.18639	0.184653	0.365767	Quadrant I
	y2080	LAO	-0.112373	0.325201	0.511491	Quadrant IV
	y2080	THA	0.138503	0.310978	0.353607	Quadrant I
	y2080	KHM	0.189102	0.461616	0.492221	Quadrant I
	y2080	VNM	-0.111597	0.412713	0.482514	Quadrant IV
	y2080	RUS	0.000874551	0.537117	0.605832	Quadrant I
	y2080	PRK	-0.274456	0.220268	-1.54924	Quadrant III
	y2080	GRL	2.08538e-06	0.45513	0.59182	Quadrant I
	y2080	ISL	0.000190874	0.729325	0.69272	Quadrant I
	y2080	ESP	0.0554167	0.332096	0.53941	Quadrant I
	y2080	IRL	0.00148935	0.591451	0.620659	Quadrant I
	y2080	PRT	0.0427312	0.404468	0.659228	Quadrant I
	y2080	GBR	-0.00354118	0.638598	0.552278	Quadrant IV
	y2080	FRA	0.139585	0.555901	0.589492	Quadrant I
	y2080	BEL	0.0183497	0.679616	0.611927	Quadrant I
	y2080	NLD	0.00419327	0.643106	0.545141	Quadrant I
	y2080	NOR	0.0157703	0.505315	0.645488	Quadrant I
	y2080	LUX	-0.00705043	0.414811	0.652116	Quadrant IV
	y2080	DEU	0.0242634	0.808359	0.599967	Quadrant I
	y2080	CHE	0.0940231	0.946674	0.61463	Quadrant I
	y2080	ITA	-0.0561006	0.383552	0.548856	Quadrant IV
	y2080	DNK	-0.00721779	0.539456	0.661137	Quadrant IV
	y2080	AUT	0.105993	0.769796	0.628389	Quadrant I
	y2080	SWE	0.000394064	0.593623	0.514939	Quadrant I
	y2080	CZE	-0.00412622	0.856451	0.564706	Quadrant IV
	y2080	HRV	0.393056	0.565601	0.52177	Quadrant I
	y2080	SVN	0.569968	0.548934	0.526589	Quadrant I
	y2080	SJM	-3.59645e-08	0.454074	0.590935	Quadrant IV
	y2080	POL	-0.00704143	0.898836	0.552345	Quadrant IV
	y2080	BIH	0.115283	0.361564	0.626778	Quadrant I
	y2080	HUN	0.061629	1.05931	0.579593	Quadrant I
	y2080	SVK	0.0322125	0.966942	0.512912	Quadrant I
	y2080	MNE	0.117689	0.565702	0.623655	Quadrant I
	y2080	SRB	0.0981853	0.702901	0.553549	Quadrant I
	y2080	ALB	0.0975518	0.467648	0.622392	Quadrant I
	y2080	GRC	-0.0213051	0.258773	0.540364	Quadrant IV
	y2080	MKD	0.102762	0.465647	0.518949	Quadrant I
	y2080	ROU	0.042382	0.586368	0.546187	Quadrant I
	y2080	LTU	-0.00718556	0.701443	0.625052	Quadrant IV
	y2080	LVA	-0.00674934	0.6206	0.622493	Quadrant IV
	y2080	FIN	0.00182655	0.699029	0.581403	Quadrant I
	y2080	EST	-0.00219384	0.61954	0.624461	Quadrant IV
	y2080	BGR	0.0672882	0.79183	0.501516	Quadrant I
	y2080	BLR	0.00441347	0.705696	0.636058	Quadrant I
	y2080	TUR	0.0322624	0.196247	0.439534	Quadrant I
	y2080	MDA	0.0049357	0.676207	0.541849	Quadrant I
	y2080	CYP	-3.27918e-09	0.26343	0.42022	Quadrant IV
	y2080	IRN	0.000350846	0.165666	0.200991	Quadrant I
	y2080	UKR	0.0049286	0.712268	0.608612	Quadrant I
	y2080	GEO	0.00354991	0.632873	0.451277	Quadrant I
	y2080	ARM	-0.00198133	0.686703	0.523047	Quadrant IV
	y2080	AZE	-0.0089823	0.454455	0.415673	Quadrant IV
	y2080	KAZ	0.000934148	0.635795	0.535274	Quadrant I
	y2080	TKM	-0.00571159	0.579275	0.572504	Quadrant IV
	y2080	UZB	-0.0142888	0.514853	0.525191	Quadrant IV
	y2080	AFG	-0.0640472	0.637293	0.306683	Quadrant IV
	y2080	TJK	-0.00665728	0.695493	0.40848	Quadrant IV
	y2080	KGZ	-0.00765169	0.72428	0.560463	Quadrant IV
	y2080	MEX	0.417173	0.630061	0.310879	Quadrant I
	y2080	USA	0.0622327	0.66854	0.557264	Quadrant I
	y2080	GTM	0.685393	0.577646	0.0814652	Quadrant I
	y2080	ECU	0.0506316	0.856868	0.359105	Quadrant I
	y2080	SLV	0.574347	0.582615	0.232995	Quadrant I
	y2080	HND	0.554567	0.840104	0.274395	Quadrant I
	y2080	BLZ	0.920311	0.448537	0.469925	Quadrant I
	y2080	NIC	0.387093	0.676107	0.22799	Quadrant I
	y2080	CRI	0.465729	0.580009	0.292134	Quadrant I
	y2080	CUB	0.5402	0.749293	0.282156	Quadrant I
	y2080	PAN	0.0941536	0.475127	0.345701	Quadrant I
	y2080	PER	0.139091	0.263811	0.302495	Quadrant I
	y2080	COL	0.156097	0.859986	0.223794	Quadrant I
	y2080	BHS	0.974787	0.4167	0.472191	Quadrant I
	y2080	JAM	0.609459	0.35056	0.347953	Quadrant I
	y2080	CHL	0.0390513	0.811612	0.36306	Quadrant I
	y2080	HTI	0.557213	0.584899	0.384168	Quadrant I
	y2080	BRA	0.264618	0.635481	0.425284	Quadrant I
	y2080	ARG	0.770589	1.0667	0.504471	Quadrant I
	y2080	VEN	0.376963	0.629099	0.208357	Quadrant I
	y2080	DOM	0.56034	0.484231	0.320628	Quadrant I
	y2080	BOL	0.182178	1.07672	0.400048	Quadrant I
	y2080	PRY	0.15322	0.782758	0.36408	Quadrant I
	y2080	TTO	0.0966683	0.44811	0.119939	Quadrant I
	y2080	FLK	0	0.471838	0.469969	NA
	y2080	GUY	0.0554116	0.288512	0.391168	Quadrant I
	y2080	URY	0.884112	0.82902	0.436353	Quadrant I
	y2080	SUR	-0.231472	0.50554	0.2793	Quadrant IV
	y2080	GUF	-2.19107	0.375141	0.300469	Quadrant IV
	y2080	SGS	0	0.462436	0.457203	NA
	y2080	MAR	3.21822e-05	0.251202	0.44293	Quadrant I
	y2080	TUN	0.00468071	0.17241	0.353902	Quadrant I
	y2080	SAU	0.0441925	0.263599	0.247609	Quadrant I
	y2080	ISR	2.82843e-10	0.158694	0.514774	Quadrant I
	y2080	JOR	-2.96111e-10	0.406845	0.393577	Quadrant IV
	y2080	LBN	-6.38747e-06	0.205693	0.427747	Quadrant IV
	y2080	SYR	0.000584356	0.430808	0.517984	Quadrant I
	y2080	IRQ	-0.000219915	0.318975	-0.0973863	Quadrant III
	y2080	YEM	0.0175439	0.525073	0.261874	Quadrant I
	y2080	KWT	-2.67416e-09	0.264037	0.413002	Quadrant IV
	y2080	QAT	-8.1562e-06	0.44164	0.564501	Quadrant IV
	y2080	OMN	0.120722	0.196768	0.443587	Quadrant I
	y2080	ARE	4.66036e-09	0.118305	0.170969	Quadrant I
	y2080	PAK	-0.00429175	0.763903	0.31726	Quadrant IV
	y2080	CAN	-0.000950364	0.52305	0.468393	Quadrant IV
	y2080	PRI	0.687623	0.441717	0.443422	Quadrant I
	y2080	AUS	0.0472954	0.665933	0.524475	Quadrant I
	y2080	JPN	-0.078129	0.188418	0.384219	Quadrant IV
	y2080	NZL	-0.000510143	0.64389	0.532452	Quadrant IV
	y2080	IDN	0.0548749	0.240687	0.17711	Quadrant I
	y2080	MYS	0.0964396	0.278486	0.322603	Quadrant I
	y2080	SGP	0.108965	0.452428	0.511718	Quadrant I
	y2080	BRN	0.108965	0.273605	0.238401	Quadrant I
	y2080	PHL	0.106223	0.513808	0.425313	Quadrant I
	y2080	TLS	-0.00153956	0.760597	0.409021	Quadrant IV
	y2080	KOR	-0.282936	0.207851	0.399944	Quadrant IV
	y2080	PNG	-0.043236	0.5331	0.463593	Quadrant IV
	y2080	SLB	0.108965	0.436745	0.517932	Quadrant I
	y2080	NCL	0.23037	0.303551	0.430685	Quadrant I
	y2080	VUT	0.108965	0.455817	0.541229	Quadrant I
	y2080	FJI	0.0911668	0.2505	0.448123	Quadrant I
	y2080	REU	-0.00133727	0.394567	0.419152	Quadrant IV
	y2080	LKA	-0.0819417	0.133432	0.214268	Quadrant IV
	y2080	BGD	-0.0431365	0.216339	0.311733	Quadrant IV
	y2080	BTN	-0.0597863	0.420493	0.509051	Quadrant IV
	y2090	SEN	0.598948	0.219054	0.412775	Quadrant I
	y2090	GMB	0.051396	0.241133	0.412634	Quadrant I
	y2090	MRT	0.219901	0.576604	0.371368	Quadrant I
	y2090	ESH	0.0333333	0.344394	0.139453	Quadrant I
	y2090	GNB	0.117587	0.782633	0.510348	Quadrant I
	y2090	GIN	0.120889	0.284327	0.528873	Quadrant I
	y2090	SLE	0.491423	0.140946	0.566352	Quadrant I
	y2090	MLI	0.761359	0.415471	0.464627	Quadrant I
	y2090	LBR	0.521601	0.393745	0.480282	Quadrant I
	y2090	CIV	-0.226988	0.302015	0.565221	Quadrant IV
	y2090	BFA	0.793592	0.22489	0.667542	Quadrant I
	y2090	GHA	-0.123581	0.356212	0.555603	Quadrant IV
	y2090	TGO	-0.399327	0.28318	0.505314	Quadrant IV
	y2090	NER	0.317384	0.235509	0.480441	Quadrant I
	y2090	BEN	0.0231128	0.109986	0.477349	Quadrant I
	y2090	DZA	0.0255891	0.282935	0.196053	Quadrant I
	y2090	NGA	0.299872	0.16841	0.448867	Quadrant I
	y2090	CMR	0.174639	0.168485	0.546439	Quadrant I
	y2090	GAB	0.0027609	0.411045	0.445801	Quadrant I
	y2090	GNQ	0.174378	0.435552	0.516963	Quadrant I
	y2090	NAM	-0.022136	0.496921	0.424167	Quadrant IV
	y2090	AGO	-0.121009	0.464867	0.425786	Quadrant IV
	y2090	COG	0.422613	0.404356	0.408919	Quadrant I
	y2090	COD	0.0336699	0.421301	0.455322	Quadrant I
	y2090	LBY	0.00308723	0.337766	0.537415	Quadrant I
	y2090	TCD	0.760733	0.265274	0.438776	Quadrant I
	y2090	CAF	0.678913	0.59007	0.59603	Quadrant I
	y2090	ZAF	0.0215597	0.647337	0.445606	Quadrant I
	y2090	BWA	-0.00596157	0.574415	0.242385	Quadrant IV
	y2090	ZMB	-0.00737068	0.312414	0.445631	Quadrant IV
	y2090	SDN	0.143273	0.736015	0.509088	Quadrant I
	y2090	ZWE	-0.0336647	0.816149	0.538547	Quadrant IV
	y2090	LSO	0.000485842	0.802599	0.526563	Quadrant I
	y2090	BDI	-0.0759093	0.394577	0.455832	Quadrant IV
	y2090	RWA	-0.117747	0.431298	0.507077	Quadrant IV
	y2090	TZA	0.00694593	0.265065	0.489185	Quadrant I
	y2090	UGA	-0.0466916	0.443827	0.575471	Quadrant IV
	y2090	MOZ	-0.0647038	0.443766	0.492388	Quadrant IV
	y2090	SWZ	0.0176647	0.661907	0.289348	Quadrant I
	y2090	MWI	-0.0254414	0.422307	0.518386	Quadrant IV
	y2090	ETH	0.0111769	0.626914	0.450802	Quadrant I
	y2090	EGY	0.00295054	0.153398	0.394691	Quadrant I
	y2090	KEN	0.0237593	0.625901	0.419249	Quadrant I
	y2090	ERI	0.140815	0.339323	0.342882	Quadrant I
	y2090	SOM	0.00479537	0.367983	-0.00848413	Quadrant II
	y2090	DJI	0.0549771	0.535803	0.353169	Quadrant I
	y2090	MDG	0.0685155	0.545668	0.446997	Quadrant I
	y2090	MUS	0	0.239074	0.298844	NA
	y2090	ATF	0	0.373602	0.437736	NA
	y2090	CHN	0.119191	0.329045	0.542104	Quadrant I
	y2090	IND	0.0183884	0.224009	0.346483	Quadrant I
	y2090	NPL	-0.10463	0.309962	0.358002	Quadrant IV
	y2090	MNG	0.165056	1.10725	0.646754	Quadrant I
	y2090	MMR	0.0798996	0.205449	0.415671	Quadrant I
	y2090	LAO	-0.123996	0.330914	0.543208	Quadrant IV
	y2090	THA	-0.00418988	0.318165	0.382688	Quadrant IV
	y2090	KHM	0.0713582	0.486464	0.529159	Quadrant I
	y2090	VNM	-0.110997	0.422993	0.511614	Quadrant IV
	y2090	RUS	0.00305458	0.532972	0.609647	Quadrant I
	y2090	PRK	-0.134437	0.233465	-1.6424	Quadrant III
	y2090	GRL	2.44911e-06	0.448055	0.598059	Quadrant I
	y2090	ISL	0.000218698	0.723548	0.700129	Quadrant I
	y2090	ESP	0.0778654	0.333601	0.546616	Quadrant I
	y2090	IRL	0.001074	0.582043	0.622345	Quadrant I
	y2090	PRT	0.0665614	0.400716	0.663461	Quadrant I
	y2090	GBR	-0.00324853	0.635444	0.556673	Quadrant IV
	y2090	FRA	0.148543	0.554379	0.594686	Quadrant I
	y2090	BEL	0.0321516	0.670315	0.61464	Quadrant I
	y2090	NLD	0.0102498	0.635633	0.548082	Quadrant I
	y2090	NOR	0.0149965	0.499753	0.652861	Quadrant I
	y2090	LUX	-0.00555256	0.412936	0.653303	Quadrant IV
	y2090	DEU	0.0234064	0.802495	0.60315	Quadrant I
	y2090	CHE	0.0917926	0.943264	0.622426	Quadrant I
	y2090	ITA	-0.100382	0.379572	0.553258	Quadrant IV
	y2090	DNK	-0.00707341	0.533656	0.664345	Quadrant IV
	y2090	AUT	0.0994217	0.76121	0.63064	Quadrant I
	y2090	SWE	0.000273024	0.590231	0.519429	Quadrant I
	y2090	CZE	-0.00430841	0.852964	0.567703	Quadrant IV
	y2090	HRV	0.397129	0.56175	0.526073	Quadrant I
	y2090	SVN	0.564658	0.543751	0.530755	Quadrant I
	y2090	SJM	2.03521e-08	0.447715	0.598207	Quadrant I
	y2090	POL	-0.00672659	0.896834	0.556843	Quadrant IV
	y2090	BIH	0.113534	0.361683	0.637944	Quadrant I
	y2090	HUN	0.0499	1.05195	0.583819	Quadrant I
	y2090	SVK	0.0278568	0.952721	0.513096	Quadrant I
	y2090	MNE	0.11596	0.572216	0.633092	Quadrant I
	y2090	SRB	0.0964173	0.706831	0.566879	Quadrant I
	y2090	ALB	0.0958	0.470339	0.633464	Quadrant I
	y2090	GRC	-0.0340936	0.258541	0.54599	Quadrant IV
	y2090	MKD	0.101144	0.464532	0.529566	Quadrant I
	y2090	ROU	0.01692	0.587573	0.554019	Quadrant I
	y2090	LTU	-0.00677998	0.702451	0.628663	Quadrant IV
	y2090	LVA	-0.00503463	0.617663	0.627251	Quadrant IV
	y2090	FIN	0.00136306	0.703892	0.586283	Quadrant I
	y2090	EST	-0.00155617	0.618708	0.62885	Quadrant IV
	y2090	BGR	0.0462359	0.785138	0.506564	Quadrant I
	y2090	BLR	0.00601295	0.699378	0.638903	Quadrant I
	y2090	TUR	0.0314999	0.1968	0.450951	Quadrant I
	y2090	MDA	0.0053791	0.677794	0.550257	Quadrant I
	y2090	CYP	-3.18484e-09	0.264317	0.427583	Quadrant IV
	y2090	IRN	0.000409914	0.162378	0.213959	Quadrant I
	y2090	UKR	0.00539862	0.712188	0.614241	Quadrant I
	y2090	GEO	0.00485834	0.629663	0.46004	Quadrant I
	y2090	ARM	0.0185191	0.687293	0.530977	Quadrant I
	y2090	AZE	0.0308703	0.449762	0.437496	Quadrant I
	y2090	KAZ	0.0141725	0.628566	0.537605	Quadrant I
	y2090	TKM	0.0270301	0.559991	0.569179	Quadrant I
	y2090	UZB	0.0333641	0.511453	0.532047	Quadrant I
	y2090	AFG	-0.00328275	0.650194	0.385774	Quadrant IV
	y2090	TJK	0.0372262	0.705484	0.424843	Quadrant I
	y2090	KGZ	0.0265779	0.732932	0.571272	Quadrant I
	y2090	MEX	0.395868	0.633037	0.333261	Quadrant I
	y2090	USA	0.0534214	0.662444	0.556005	Quadrant I
	y2090	GTM	0.668604	0.597843	0.126598	Quadrant I
	y2090	ECU	0.0881289	0.852058	0.388109	Quadrant I
	y2090	SLV	0.523228	0.593589	0.272254	Quadrant I
	y2090	HND	0.527367	0.862203	0.315582	Quadrant I
	y2090	BLZ	0.917173	0.457161	0.492815	Quadrant I
	y2090	NIC	0.363102	0.692122	0.270005	Quadrant I
	y2090	CRI	0.468701	0.581701	0.316229	Quadrant I
	y2090	CUB	0.523714	0.766811	0.308357	Quadrant I
	y2090	PAN	0.111	0.466637	0.359278	Quadrant I
	y2090	PER	0.146277	0.266476	0.320751	Quadrant I
	y2090	COL	0.167969	0.859212	0.248642	Quadrant I
	y2090	BHS	0.973797	0.413568	0.484997	Quadrant I
	y2090	JAM	0.594742	0.362756	0.375798	Quadrant I
	y2090	CHL	0.0456875	0.809387	0.378562	Quadrant I
	y2090	HTI	0.525694	0.611973	0.420893	Quadrant I
	y2090	BRA	0.276591	0.638105	0.445247	Quadrant I
	y2090	ARG	0.773259	1.05025	0.523338	Quadrant I
	y2090	VEN	0.374687	0.631042	0.230508	Quadrant I
	y2090	DOM	0.542886	0.481653	0.333909	Quadrant I
	y2090	BOL	0.188673	1.08235	0.4249	Quadrant I
	y2090	PRY	0.15013	0.791722	0.384465	Quadrant I
	y2090	TTO	0.0955928	0.445527	0.133815	Quadrant I
	y2090	FLK	0.125	0.465297	0.479895	Quadrant I
	y2090	GUY	0.0552679	0.299191	0.41524	Quadrant I
	y2090	URY	0.881636	0.818485	0.457024	Quadrant I
	y2090	SUR	-0.231592	0.504229	0.296557	Quadrant IV
	y2090	GUF	-2.18431	0.368109	0.305773	Quadrant IV
	y2090	SGS	0	0.456079	0.467339	NA
	y2090	MAR	0.000123767	0.246521	0.451714	Quadrant I
	y2090	TUN	0.0169129	0.170096	0.358885	Quadrant I
	y2090	SAU	0.0611009	0.257558	0.2452	Quadrant I
	y2090	ISR	4.33397e-10	0.156501	0.517055	Quadrant I
	y2090	JOR	7.13828e-07	0.410029	0.404955	Quadrant I
	y2090	LBN	-6.42235e-06	0.202468	0.430627	Quadrant IV
	y2090	SYR	0.000600222	0.433695	0.527547	Quadrant I
	y2090	IRQ	-0.000106676	0.315361	-0.0227301	Quadrant III
	y2090	YEM	0.0210077	0.526449	0.309242	Quadrant I
	y2090	KWT	4.06611e-10	0.259036	0.409578	Quadrant I
	y2090	QAT	-8.98643e-06	0.437095	0.560063	Quadrant IV
	y2090	OMN	0.164954	0.190985	0.439808	Quadrant I
	y2090	ARE	5.14619e-09	0.112505	0.161969	Quadrant I
	y2090	PAK	-0.011126	0.788696	0.368252	Quadrant IV
	y2090	CAN	-0.00181666	0.5164	0.458863	Quadrant IV
	y2090	PRI	0.675644	0.438794	0.45672	Quadrant I
	y2090	AUS	0.0290697	0.655961	0.517619	Quadrant I
	y2090	JPN	-0.0426043	0.189417	0.393184	Quadrant IV
	y2090	NZL	0.00331221	0.634947	0.525243	Quadrant I
	y2090	IDN	0.0536417	0.239214	0.220701	Quadrant I
	y2090	MYS	0.0936653	0.280012	0.348559	Quadrant I
	y2090	SGP	0.105714	0.446196	0.525809	Quadrant I
	y2090	BRN	0.105714	0.270218	0.258132	Quadrant I
	y2090	PHL	0.0546573	0.531677	0.461624	Quadrant I
	y2090	TLS	-0.00205136	0.787808	0.451589	Quadrant IV
	y2090	KOR	-0.139732	0.205624	0.418779	Quadrant IV
	y2090	PNG	-0.0409831	0.548971	0.499216	Quadrant IV
	y2090	SLB	0.105714	0.453556	0.553409	Quadrant I
	y2090	NCL	0.163168	0.296967	0.447758	Quadrant I
	y2090	VUT	0.105714	0.475236	0.568925	Quadrant I
	y2090	FJI	0.0911558	0.260247	0.482374	Quadrant I
	y2090	REU	0.00659598	0.388196	0.420622	Quadrant I
	y2090	LKA	-0.083638	0.139011	0.259792	Quadrant IV
	y2090	BGD	-0.0615018	0.212854	0.367149	Quadrant IV
	y2090	BTN	-0.00969358	0.419345	0.529804	Quadrant IV
	y2100	SEN	0.585597	0.226314	0.441657	Quadrant I
	y2100	GMB	0.0450342	0.250796	0.439349	Quadrant I
	y2100	MRT	0.259834	0.579476	0.400685	Quadrant I
	y2100	ESH	0.230769	0.341618	0.174017	Quadrant I
	y2100	GNB	0.111644	0.803623	0.531513	Quadrant I
	y2100	GIN	0.115592	0.283985	0.544784	Quadrant I
	y2100	SLE	0.491683	0.154096	0.588516	Quadrant I
	y2100	MLI	0.787873	0.419988	0.498017	Quadrant I
	y2100	LBR	0.522489	0.415295	0.506982	Quadrant I
	y2100	CIV	-0.233253	0.299323	0.577559	Quadrant IV
	y2100	BFA	0.80993	0.22717	0.683558	Quadrant I
	y2100	GHA	-0.127653	0.357843	0.571462	Quadrant IV
	y2100	TGO	-0.403234	0.302473	0.533838	Quadrant IV
	y2100	NER	0.257882	0.264705	0.519666	Quadrant I
	y2100	BEN	0.00780841	0.11785	0.505992	Quadrant I
	y2100	DZA	0.032123	0.281068	0.247837	Quadrant I
	y2100	NGA	0.192215	0.171916	0.471239	Quadrant I
	y2100	CMR	0.194352	0.175938	0.564095	Quadrant I
	y2100	GAB	0.00282566	0.408617	0.456836	Quadrant I
	y2100	GNQ	0.197632	0.433418	0.525957	Quadrant I
	y2100	NAM	0.0518171	0.483865	0.443442	Quadrant I
	y2100	AGO	-0.0293516	0.488306	0.459103	Quadrant IV
	y2100	COG	0.453559	0.403765	0.428169	Quadrant I
	y2100	COD	0.0905063	0.439382	0.486936	Quadrant I
	y2100	LBY	0.0268009	0.334728	0.560355	Quadrant I
	y2100	TCD	0.784858	0.287754	0.475553	Quadrant I
	y2100	CAF	0.694137	0.596992	0.623823	Quadrant I
	y2100	ZAF	0.0213141	0.636107	0.45631	Quadrant I
	y2100	BWA	-0.00543218	0.562459	0.25855	Quadrant IV
	y2100	ZMB	0.00363349	0.323964	0.474172	Quadrant I
	y2100	SDN	0.179064	0.754837	0.548101	Quadrant I
	y2100	ZWE	-0.0321981	0.846774	0.568717	Quadrant IV
	y2100	LSO	0.000686276	0.798058	0.550327	Quadrant I
	y2100	BDI	-0.0769713	0.414118	0.489884	Quadrant IV
	y2100	RWA	-0.116287	0.438907	0.534028	Quadrant IV
	y2100	TZA	0.00519403	0.276807	0.515965	Quadrant I
	y2100	UGA	-0.0475818	0.465409	0.596192	Quadrant IV
	y2100	MOZ	-0.0572216	0.466622	0.517495	Quadrant IV
	y2100	SWZ	0.0187824	0.666906	0.321324	Quadrant I
	y2100	MWI	0.0231027	0.457088	0.549895	Quadrant I
	y2100	ETH	0.0100224	0.64582	0.483883	Quadrant I
	y2100	EGY	0.0456091	0.151827	0.424414	Quadrant I
	y2100	KEN	0.013546	0.637583	0.451907	Quadrant I
	y2100	ERI	0.151478	0.350946	0.410985	Quadrant I
	y2100	SOM	0.00334805	0.359655	0.0810172	Quadrant I
	y2100	DJI	0.0541913	0.530259	0.380398	Quadrant I
	y2100	MDG	0.0927596	0.553644	0.483198	Quadrant I
	y2100	MUS	0	0.234551	0.311645	NA
	y2100	ATF	0	0.368784	0.452626	NA
	y2100	CHN	0.065572	0.331434	0.554495	Quadrant I
	y2100	IND	0.0144488	0.23162	0.369376	Quadrant I
	y2100	NPL	-0.0935005	0.32015	0.406784	Quadrant IV
	y2100	MNG	0.215142	1.11667	0.661984	Quadrant I
	y2100	MMR	0.135509	0.223904	0.452111	Quadrant I
	y2100	LAO	-0.116934	0.333304	0.568167	Quadrant IV
	y2100	THA	0.0510432	0.322893	0.402509	Quadrant I
	y2100	KHM	0.126454	0.503578	0.555055	Quadrant I
	y2100	VNM	-0.10554	0.431832	0.532157	Quadrant IV
	y2100	RUS	0.00280725	0.528692	0.617169	Quadrant I
	y2100	PRK	-0.0126792	0.246033	-1.79899	Quadrant III
	y2100	GRL	2.51663e-06	0.441027	0.613901	Quadrant I
	y2100	ISL	0.000212853	0.716993	0.715117	Quadrant I
	y2100	ESP	0.0777301	0.334421	0.563562	Quadrant I
	y2100	IRL	0.000670316	0.572935	0.635084	Quadrant I
	y2100	PRT	0.0667968	0.395811	0.676268	Quadrant I
	y2100	GBR	-0.00308474	0.631534	0.572931	Quadrant IV
	y2100	FRA	0.14009	0.552331	0.609688	Quadrant I
	y2100	BEL	0.0331562	0.660581	0.628994	Quadrant I
	y2100	NLD	0.0113196	0.627738	0.563685	Quadrant I
	y2100	NOR	0.0129613	0.493613	0.66907	Quadrant I
	y2100	LUX	-0.0034064	0.406545	0.663713	Quadrant IV
	y2100	DEU	0.0218348	0.795884	0.617356	Quadrant I
	y2100	CHE	0.0786733	0.939149	0.637171	Quadrant I
	y2100	ITA	-0.102301	0.374953	0.570285	Quadrant IV
	y2100	DNK	-0.00750744	0.526941	0.676137	Quadrant IV
	y2100	AUT	0.091521	0.751669	0.644039	Quadrant I
	y2100	SWE	0.00020215	0.586269	0.537806	Quadrant I
	y2100	CZE	-0.00485782	0.847854	0.582787	Quadrant IV
	y2100	HRV	0.389159	0.556927	0.544828	Quadrant I
	y2100	SVN	0.557913	0.538236	0.549403	Quadrant I
	y2100	SJM	1.77617e-08	0.441411	0.615358	Quadrant I
	y2100	POL	-0.00682286	0.893523	0.573786	Quadrant IV
	y2100	BIH	0.0979911	0.360301	0.65693	Quadrant I
	y2100	HUN	0.0349304	1.03903	0.599518	Quadrant I
	y2100	SVK	0.0225152	0.936244	0.531792	Quadrant I
	y2100	MNE	0.100387	0.576967	0.64698	Quadrant I
	y2100	SRB	0.0805239	0.709245	0.589088	Quadrant I
	y2100	ALB	0.0810505	0.470926	0.651038	Quadrant I
	y2100	GRC	-0.0340589	0.257391	0.563891	Quadrant IV
	y2100	MKD	0.0860809	0.461402	0.548405	Quadrant I
	y2100	ROU	0.0043269	0.587253	0.573212	Quadrant I
	y2100	LTU	-0.00671456	0.701644	0.64261	Quadrant IV
	y2100	LVA	-0.00246171	0.613322	0.641785	Quadrant IV
	y2100	FIN	0.000922049	0.708182	0.601322	Quadrant I
	y2100	EST	-0.000572964	0.617124	0.642665	Quadrant IV
	y2100	BGR	0.0369635	0.77628	0.525133	Quadrant I
	y2100	BLR	0.00602577	0.69161	0.645345	Quadrant I
	y2100	TUR	0.0260456	0.196715	0.469364	Quadrant I
	y2100	MDA	0.00468277	0.677089	0.560804	Quadrant I
	y2100	CYP	0.00391232	0.263984	0.45104	Quadrant I
	y2100	IRN	0.000524385	0.159754	0.256155	Quadrant I
	y2100	UKR	0.00472357	0.709256	0.622731	Quadrant I
	y2100	GEO	0.00492896	0.624496	0.474192	Quadrant I
	y2100	ARM	0.00758539	0.685889	0.544165	Quadrant I
	y2100	AZE	0.00878477	0.445688	0.46037	Quadrant I
	y2100	KAZ	0.00848882	0.621643	0.545411	Quadrant I
	y2100	TKM	0.070528	0.540005	0.576388	Quadrant I
	y2100	UZB	0.0306819	0.504814	0.546035	Quadrant I
	y2100	AFG	0.0493996	0.68139	0.441259	Quadrant I
	y2100	TJK	0.0227229	0.707819	0.44741	Quadrant I
	y2100	KGZ	0.00727962	0.735745	0.584459	Quadrant I
	y2100	MEX	0.37425	0.63339	0.34601	Quadrant I
	y2100	USA	0.0771674	0.656416	0.570078	Quadrant I
	y2100	GTM	0.646523	0.612194	0.155939	Quadrant I
	y2100	ECU	0.0866346	0.842579	0.398143	Quadrant I
	y2100	SLV	0.470474	0.598826	0.290546	Quadrant I
	y2100	HND	0.492508	0.875332	0.332194	Quadrant I
	y2100	BLZ	0.913208	0.460608	0.50565	Quadrant I
	y2100	NIC	0.333201	0.699984	0.28855	Quadrant I
	y2100	CRI	0.460703	0.58109	0.327675	Quadrant I
	y2100	CUB	0.503194	0.778282	0.327786	Quadrant I
	y2100	PAN	0.10979	0.457216	0.368678	Quadrant I
	y2100	PER	0.165964	0.267576	0.342472	Quadrant I
	y2100	COL	0.163521	0.855064	0.261413	Quadrant I
	y2100	BHS	0.972543	0.408889	0.492779	Quadrant I
	y2100	JAM	0.57697	0.371167	0.396312	Quadrant I
	y2100	CHL	0.0498577	0.804572	0.388201	Quadrant I
	y2100	HTI	0.491969	0.625479	0.446262	Quadrant I
	y2100	BRA	0.26677	0.637988	0.453526	Quadrant I
	y2100	ARG	0.756762	1.03123	0.523117	Quadrant I
	y2100	VEN	0.307546	0.630763	0.251073	Quadrant I
	y2100	DOM	0.522634	0.477733	0.350404	Quadrant I
	y2100	BOL	0.188104	1.07787	0.433155	Quadrant I
	y2100	PRY	0.145948	0.794798	0.400167	Quadrant I
	y2100	TTO	0.090766	0.442079	0.150197	Quadrant I
	y2100	FLK	0.142857	0.458807	0.486822	Quadrant I
	y2100	GUY	0.0550533	0.308392	0.434546	Quadrant I
	y2100	URY	0.87114	0.805597	0.458555	Quadrant I
	y2100	SUR	-0.22354	0.501633	0.319619	Quadrant IV
	y2100	GUF	-2.17136	0.362142	0.311481	Quadrant IV
	y2100	SGS	1	0.449778	0.474529	Quadrant I
	y2100	MAR	0.000863358	0.243048	0.481367	Quadrant I
	y2100	TUN	0.245469	0.167289	0.393794	Quadrant I
	y2100	SAU	0.0124238	0.251562	0.271754	Quadrant I
	y2100	ISR	6.14475e-10	0.154059	0.538727	Quadrant I
	y2100	JOR	2.10789e-05	0.410934	0.437733	Quadrant I
	y2100	LBN	0.0422435	0.197818	0.45966	Quadrant I
	y2100	SYR	0.000599909	0.434121	0.555289	Quadrant I
	y2100	IRQ	0.000150018	0.313427	0.0541296	Quadrant I
	y2100	YEM	0.00189268	0.536345	0.371297	Quadrant I
	y2100	KWT	-3.20636e-09	0.254136	0.428718	Quadrant IV
	y2100	QAT	2.53675e-06	0.432135	0.573427	Quadrant I
	y2100	OMN	1.09681e-08	0.184587	0.459186	Quadrant I
	y2100	ARE	0.0354974	0.108745	0.184646	Quadrant I
	y2100	PAK	0.00458467	0.804791	0.406117	Quadrant I
	y2100	CAN	-0.000965488	0.509281	0.468361	Quadrant IV
	y2100	PRI	0.660721	0.435538	0.467193	Quadrant I
	y2100	AUS	0.0169479	0.645528	0.525757	Quadrant I
	y2100	JPN	-0.0287734	0.190305	0.421904	Quadrant IV
	y2100	NZL	0.00519974	0.624396	0.534109	Quadrant I
	y2100	IDN	0.0934333	0.23721	0.254603	Quadrant I
	y2100	MYS	0.12985	0.280905	0.365938	Quadrant I
	y2100	SGP	0.12162	0.439988	0.535909	Quadrant I
	y2100	BRN	0.12162	0.266397	0.273449	Quadrant I
	y2100	PHL	0.0833834	0.544497	0.488677	Quadrant I
	y2100	TLS	-0.00204467	0.807522	0.484052	Quadrant IV
	y2100	KOR	-0.0155387	0.202564	0.433374	Quadrant IV
	y2100	PNG	-0.740072	0.557638	0.524495	Quadrant IV
	y2100	SLB	0.12162	0.463769	0.578261	Quadrant I
	y2100	NCL	0.20774	0.290685	0.462205	Quadrant I
	y2100	VUT	0.12162	0.488927	0.588787	Quadrant I
	y2100	FJI	0.113546	0.266378	0.508939	Quadrant I
	y2100	REU	0.00872283	0.382234	0.422364	Quadrant I
	y2100	LKA	-0.0825579	0.143102	0.290718	Quadrant IV
	y2100	BGD	-0.0563878	0.209738	0.406709	Quadrant IV
	y2100	BTN	0.0488874	0.416656	0.544179	Quadrant I

## Sheet: HUS
	HUS
	Year	Region	Water	AHEI	Cost	Quadrant
	y2030	SEN	0.014943	0.0103777	-0.502504	Quadrant II
	y2030	GMB	8.08107e-06	0.076756	-0.600669	Quadrant II
	y2030	MRT	-0.0594203	0.162249	-0.317841	Quadrant III
	y2030	ESH	-0.030302	0.111926	-0.159579	Quadrant III
	y2030	GNB	8.08724e-06	0.216337	-0.550331	Quadrant II
	y2030	GIN	-0.00188705	0.0187153	-0.294655	Quadrant III
	y2030	SLE	-0.00595492	0.0127064	-0.452381	Quadrant III
	y2030	MLI	0.00548388	0.190977	-0.346369	Quadrant II
	y2030	LBR	-0.00617169	0.162565	-0.983703	Quadrant III
	y2030	CIV	-0.0056697	0.0881348	0.0238914	Quadrant IV
	y2030	BFA	-3.87409e-06	0.12882	0.053861	Quadrant IV
	y2030	GHA	-0.00531966	0.0897256	-0.050118	Quadrant III
	y2030	TGO	-0.0041544	0.0354493	-0.548388	Quadrant III
	y2030	NER	0.058624	0.0567018	-0.368976	Quadrant II
	y2030	BEN	-0.0453046	0.0116221	-0.29877	Quadrant III
	y2030	DZA	-0.00281617	0.0609761	-0.393292	Quadrant III
	y2030	NGA	0.00197674	0.0510421	-0.356187	Quadrant II
	y2030	CMR	-0.00195322	0.0302067	-0.115125	Quadrant III
	y2030	GAB	-0.000255361	0.104236	0.108155	Quadrant IV
	y2030	GNQ	-0.00156848	0.106549	0.205802	Quadrant IV
	y2030	NAM	0.00171341	0.0792927	-0.150571	Quadrant II
	y2030	AGO	0.0198604	0.155577	-0.486392	Quadrant II
	y2030	COG	-0.000647786	0.100299	-0.774131	Quadrant III
	y2030	COD	0.00127597	0.163697	-1.29384	Quadrant II
	y2030	LBY	-0.00768013	0.0922016	0.360108	Quadrant IV
	y2030	TCD	-0.000512837	0.106063	-1.228	Quadrant III
	y2030	CAF	0.000995749	0.154635	-0.328854	Quadrant II
	y2030	ZAF	0.033485	0.215529	0.086467	Quadrant I
	y2030	BWA	-0.0204035	0.148888	-0.189575	Quadrant III
	y2030	ZMB	-0.0315006	0.0329002	-1.05525	Quadrant III
	y2030	SDN	0.0150005	0.131482	-0.103108	Quadrant II
	y2030	ZWE	-0.00530841	0.220816	-0.546903	Quadrant III
	y2030	LSO	-0.000831183	0.219538	-0.683662	Quadrant III
	y2030	BDI	0.0486171	0.161365	-1.59695	Quadrant II
	y2030	RWA	0.113857	0.157593	-0.300218	Quadrant II
	y2030	TZA	0.011661	0.0416739	-0.383236	Quadrant II
	y2030	UGA	0.106397	0.113616	-0.245025	Quadrant II
	y2030	MOZ	-0.011808	0.137952	-0.673047	Quadrant III
	y2030	SWZ	0.00949172	0.214174	-0.380143	Quadrant II
	y2030	MWI	0.185296	0.123819	-0.863655	Quadrant II
	y2030	ETH	-0.00125727	0.163223	-0.767208	Quadrant III
	y2030	EGY	-0.0122706	0.0322532	-0.0209709	Quadrant III
	y2030	KEN	0.0129513	0.132418	-0.461906	Quadrant II
	y2030	ERI	-0.00766317	0.130765	-0.433178	Quadrant III
	y2030	SOM	0.0369115	0.108903	-0.0920327	Quadrant II
	y2030	DJI	-0.0805959	0.127839	-0.177981	Quadrant III
	y2030	MDG	-0.00504111	0.225312	-0.84839	Quadrant III
	y2030	MUS	0.000101	0.0591377	-0.00722386	Quadrant II
	y2030	ATF	0.000101	0.0877961	0.313013	Quadrant I
	y2030	CHN	0.0547331	0.050688	0.155624	Quadrant I
	y2030	IND	-0.0296403	0.0441899	-0.272201	Quadrant III
	y2030	NPL	-0.230979	0.0722944	-0.448433	Quadrant III
	y2030	MNG	-0.000709021	0.190662	0.45942	Quadrant IV
	y2030	MMR	-0.0976729	0.000784444	-0.0309292	Quadrant III
	y2030	LAO	-0.302724	0.068996	0.130305	Quadrant IV
	y2030	THA	0.0410131	0.0630327	0.0882094	Quadrant I
	y2030	KHM	-0.0595082	0.101062	-0.000245574	Quadrant III
	y2030	VNM	-0.276583	0.0717839	0.248412	Quadrant IV
	y2030	RUS	-0.00105385	0.120808	0.165653	Quadrant IV
	y2030	PRK	0.0214118	0.0329033	-0.936247	Quadrant II
	y2030	GRL	7.6566e-06	0.115445	0.298897	Quadrant I
	y2030	ISL	0.000576907	0.191809	0.440592	Quadrant I
	y2030	ESP	-0.0154724	0.0777301	0.0624989	Quadrant IV
	y2030	IRL	-0.000383142	0.163385	0.255879	Quadrant IV
	y2030	PRT	9.99918e-07	0.0902147	0.294158	Quadrant I
	y2030	GBR	0.000502311	0.164229	0.0743094	Quadrant I
	y2030	FRA	-0.64037	0.131084	0.14316	Quadrant IV
	y2030	BEL	0.00080348	0.182303	0.199053	Quadrant I
	y2030	NLD	0.000715329	0.175672	0.0753056	Quadrant I
	y2030	NOR	0.000559234	0.130254	0.365228	Quadrant I
	y2030	LUX	0.00100226	0.0534539	0.313416	Quadrant I
	y2030	DEU	-0.0823427	0.230016	0.178949	Quadrant IV
	y2030	CHE	0.000319794	0.280131	0.298589	Quadrant I
	y2030	ITA	-0.0586418	0.0934057	0.0665864	Quadrant IV
	y2030	DNK	0.00100226	0.129983	0.302949	Quadrant I
	y2030	AUT	-0.366224	0.207192	0.246261	Quadrant IV
	y2030	SWE	-0.000155791	0.151022	-0.00366087	Quadrant III
	y2030	CZE	-0.0595064	0.224417	0.0930977	Quadrant IV
	y2030	HRV	-0.868891	0.145855	-0.00172109	Quadrant III
	y2030	SVN	-0.915005	0.141563	0.0215651	Quadrant IV
	y2030	SJM	9.36986e-07	0.115045	0.294345	Quadrant I
	y2030	POL	0.000981428	0.234443	0.0652316	Quadrant I
	y2030	BIH	0.000162224	0.0671654	0.217967	Quadrant I
	y2030	HUN	-0.943806	0.236578	0.127174	Quadrant IV
	y2030	SVK	-0.374626	0.266252	-0.00424924	Quadrant III
	y2030	MNE	0.000156549	0.0920771	0.254546	Quadrant I
	y2030	SRB	0.000158012	0.180482	0.158735	Quadrant I
	y2030	ALB	0.000124894	0.0814869	0.239604	Quadrant I
	y2030	GRC	9.99906e-07	0.0296709	0.018768	Quadrant I
	y2030	MKD	0.000135837	0.0899401	0.0139583	Quadrant I
	y2030	ROU	-0.692094	0.121899	0.0245753	Quadrant IV
	y2030	LTU	0.00100226	0.174017	0.214144	Quadrant I
	y2030	LVA	0.000965517	0.137264	0.203095	Quadrant I
	y2030	FIN	-0.000439483	0.154273	0.117703	Quadrant IV
	y2030	EST	0.000271521	0.14548	0.201659	Quadrant I
	y2030	BGR	-0.477897	0.205593	-0.075211	Quadrant III
	y2030	BLR	-0.0054438	0.164904	0.219884	Quadrant IV
	y2030	TUR	2.3514e-05	0.0205282	-0.0956478	Quadrant II
	y2030	MDA	-0.00753229	0.167637	-0.0200397	Quadrant III
	y2030	CYP	1.00559e-06	0.0257712	-0.206425	Quadrant II
	y2030	IRN	-3.90172e-07	0.0408031	-0.23993	Quadrant III
	y2030	UKR	-0.00741519	0.152337	0.0693345	Quadrant IV
	y2030	GEO	-0.00383192	0.161394	-0.225495	Quadrant III
	y2030	ARM	0.00108449	0.15243	-0.0160861	Quadrant II
	y2030	AZE	0.001705	0.125555	-0.312439	Quadrant II
	y2030	KAZ	0.000814436	0.147977	0.0954108	Quadrant I
	y2030	TKM	0.00103483	0.152709	0.139382	Quadrant I
	y2030	UZB	0.00184339	0.129794	-0.106271	Quadrant II
	y2030	AFG	0.0155526	0.245784	-1.22398	Quadrant II
	y2030	TJK	0.00258691	0.144485	-0.937419	Quadrant II
	y2030	KGZ	0.00160303	0.145728	-0.225909	Quadrant II
	y2030	MEX	0.122122	0.14975	-0.106378	Quadrant II
	y2030	USA	-0.00158835	0.185446	0.116915	Quadrant IV
	y2030	GTM	0.0921022	0.118028	-0.751479	Quadrant II
	y2030	ECU	0.00380002	0.230506	-0.152483	Quadrant II
	y2030	SLV	0.372761	0.125986	-0.465297	Quadrant II
	y2030	HND	0.119815	0.177749	-0.568379	Quadrant II
	y2030	BLZ	-0.0376502	0.0788407	0.0150208	Quadrant IV
	y2030	NIC	0.0949144	0.143405	-0.667883	Quadrant II
	y2030	CRI	-0.0023095	0.13809	-0.0991484	Quadrant III
	y2030	CUB	0.0465171	0.170782	-0.163727	Quadrant II
	y2030	PAN	0.00139984	0.131842	-0.000496942	Quadrant II
	y2030	PER	0.00919161	0.0342229	-0.18284	Quadrant II
	y2030	COL	0.00508763	0.242959	-0.240083	Quadrant II
	y2030	BHS	-0.0471244	0.0935935	0.237849	Quadrant IV
	y2030	JAM	-0.00329776	0.0573671	-0.139735	Quadrant III
	y2030	CHL	0.0204139	0.199394	0.0249355	Quadrant I
	y2030	HTI	0.171432	0.10595	-0.805435	Quadrant II
	y2030	BRA	-0.00818923	0.15857	0.111558	Quadrant IV
	y2030	ARG	0.0147978	0.292811	0.20148	Quadrant I
	y2030	VEN	0.00512864	0.171912	-0.359766	Quadrant II
	y2030	DOM	0.0876687	0.136212	-0.00350737	Quadrant II
	y2030	BOL	0.00451843	0.267294	-0.180203	Quadrant II
	y2030	PRY	0.00578943	0.176409	-0.0516566	Quadrant II
	y2030	TTO	1.41078e-05	0.105633	-0.238739	Quadrant II
	y2030	FLK	1e-06	0.121647	0.291321	Quadrant I
	y2030	GUY	0.00635398	0.0353314	0.0964205	Quadrant I
	y2030	URY	0.000649206	0.213652	0.115702	Quadrant I
	y2030	SUR	1.5301e-05	0.11825	-0.294221	Quadrant II
	y2030	GUF	3.58883e-05	0.103088	0.129576	Quadrant I
	y2030	SGS	1e-06	0.121356	0.268391	Quadrant I
	y2030	MAR	1.51818e-05	0.0870534	-0.055032	Quadrant II
	y2030	TUN	-0.0904292	0.0399048	-0.132956	Quadrant III
	y2030	SAU	-0.000243742	0.0790066	0.0574376	Quadrant IV
	y2030	ISR	1.0003e-06	0.00756799	0.316648	Quadrant I
	y2030	JOR	1.00487e-06	0.0680707	-0.108641	Quadrant II
	y2030	LBN	9.99787e-07	0.0103339	-0.0331007	Quadrant II
	y2030	SYR	9.9993e-07	0.0963385	0.0164869	Quadrant I
	y2030	IRQ	4.57769e-05	0.0920185	-0.695949	Quadrant II
	y2030	YEM	-0.000152577	0.196677	-1.90269	Quadrant III
	y2030	KWT	1.00102e-06	0.0444838	0.255312	Quadrant I
	y2030	QAT	-3.66032e-06	0.101442	0.454772	Quadrant IV
	y2030	OMN	-0.000745627	0.0492107	0.233335	Quadrant IV
	y2030	ARE	1.00106e-06	0.0144619	0.0247101	Quadrant I
	y2030	PAK	0.0159036	0.180971	-0.306822	Quadrant II
	y2030	CAN	0.00183108	0.136615	0.0837059	Quadrant I
	y2030	PRI	-0.00623216	0.109992	0.217399	Quadrant IV
	y2030	AUS	0.00142354	0.185174	0.171746	Quadrant I
	y2030	JPN	-0.00334004	0.0095083	0.028385	Quadrant IV
	y2030	NZL	0.000356291	0.158632	0.183087	Quadrant I
	y2030	IDN	-0.00288883	0.0638619	-0.242074	Quadrant III
	y2030	MYS	0.00636941	0.0369957	0.158771	Quadrant I
	y2030	SGP	0.00746652	0.112273	0.421651	Quadrant I
	y2030	BRN	0.00746651	0.0521533	0.133499	Quadrant I
	y2030	PHL	0.00913381	0.153145	0.125236	Quadrant I
	y2030	TLS	0.0052228	0.19717	-0.679182	Quadrant II
	y2030	KOR	-0.02809	0.038767	0.269122	Quadrant IV
	y2030	PNG	-0.135619	0.135599	-0.323697	Quadrant III
	y2030	SLB	0.00746653	0.0837107	-0.16777	Quadrant II
	y2030	NCL	-0.356404	0.0584539	0.330999	Quadrant IV
	y2030	VUT	0.00746651	0.0606623	0.0514367	Quadrant I
	y2030	FJI	0.00526954	0.0182372	0.156854	Quadrant I
	y2030	REU	-0.000909371	0.1088	0.309723	Quadrant IV
	y2030	LKA	-0.251142	0.0090635	-0.331632	Quadrant III
	y2030	BGD	-0.238558	0.065816	-0.324651	Quadrant III
	y2030	BTN	-0.0647316	0.0819265	0.259066	Quadrant IV
	y2040	SEN	0.036567	0.0335596	-0.295258	Quadrant II
	y2040	GMB	-0.000141088	0.118542	-0.340092	Quadrant III
	y2040	MRT	-0.0226463	0.287994	-0.102155	Quadrant III
	y2040	ESH	1e-06	0.191418	-0.339578	Quadrant II
	y2040	GNB	-0.000141093	0.338356	-0.204716	Quadrant III
	y2040	GIN	-0.000281248	0.0511637	0.104296	Quadrant IV
	y2040	SLE	-0.000542937	0.000864909	-0.232344	Quadrant III
	y2040	MLI	0.0194503	0.33037	-0.132063	Quadrant II
	y2040	LBR	-0.00115495	0.21499	-0.571922	Quadrant III
	y2040	CIV	-0.000574287	0.141159	0.20332	Quadrant IV
	y2040	BFA	0.0211997	0.16003	0.200053	Quadrant I
	y2040	GHA	-0.000506209	0.161945	0.0771401	Quadrant IV
	y2040	TGO	-0.000521879	0.041587	-0.340625	Quadrant III
	y2040	NER	0.0905637	0.0861925	-0.207048	Quadrant II
	y2040	BEN	0.0689051	0.0140099	-0.215748	Quadrant II
	y2040	DZA	0.000120932	0.121335	-0.54718	Quadrant II
	y2040	NGA	0.0126662	0.0436034	-0.242028	Quadrant II
	y2040	CMR	0.00239502	0.0350275	0.0583313	Quadrant I
	y2040	GAB	-0.000475309	0.196499	0.120499	Quadrant IV
	y2040	GNQ	-0.00351252	0.216359	0.256456	Quadrant IV
	y2040	NAM	-0.0477211	0.273226	0.0141464	Quadrant IV
	y2040	AGO	0.0141063	0.272796	-0.648348	Quadrant II
	y2040	COG	-0.00047294	0.157152	-0.281034	Quadrant III
	y2040	COD	-0.0106956	0.245804	-0.744708	Quadrant III
	y2040	LBY	0.000595875	0.193694	0.263822	Quadrant I
	y2040	TCD	0.0200839	0.107097	-0.573328	Quadrant II
	y2040	CAF	5.99907e-05	0.286754	0.00176925	Quadrant I
	y2040	ZAF	0.00319561	0.398082	0.156639	Quadrant I
	y2040	BWA	-0.0209368	0.312986	-0.0857756	Quadrant III
	y2040	ZMB	-0.0381132	0.124867	-0.488509	Quadrant III
	y2040	SDN	0.0492805	0.274526	-0.115011	Quadrant II
	y2040	ZWE	-0.000926966	0.379298	-0.264915	Quadrant III
	y2040	LSO	-0.00116378	0.445734	-0.167831	Quadrant III
	y2040	BDI	0.0494791	0.248269	-0.883383	Quadrant II
	y2040	RWA	0.0961324	0.222068	-0.106062	Quadrant II
	y2040	TZA	0.0513942	0.0768179	-0.163513	Quadrant II
	y2040	UGA	0.0907139	0.124931	-0.0434682	Quadrant II
	y2040	MOZ	-0.0138944	0.227852	-0.357397	Quadrant III
	y2040	SWZ	0.0123642	0.37429	-0.258982	Quadrant II
	y2040	MWI	0.173977	0.173787	-0.471727	Quadrant II
	y2040	ETH	0.0185158	0.277551	-0.316445	Quadrant II
	y2040	EGY	0.000953222	0.0592601	-0.0887902	Quadrant II
	y2040	KEN	0.0325142	0.272583	-0.186277	Quadrant II
	y2040	ERI	0.000786545	0.229053	-0.517339	Quadrant II
	y2040	SOM	-5.77405e-05	0.191544	-0.19651	Quadrant III
	y2040	DJI	-0.037153	0.264988	-0.0102768	Quadrant III
	y2040	MDG	0.0804699	0.354844	-0.513932	Quadrant II
	y2040	MUS	0.000101	0.11489	-0.0387798	Quadrant II
	y2040	ATF	0.000101	0.190438	0.23319	Quadrant I
	y2040	CHN	0.0667863	0.113236	0.303206	Quadrant I
	y2040	IND	-0.0740033	0.0599006	-0.314501	Quadrant III
	y2040	NPL	-0.212919	0.142822	-0.442952	Quadrant III
	y2040	MNG	0.000546325	0.517192	0.43448	Quadrant I
	y2040	MMR	-0.0189417	0.00765125	-0.0634922	Quadrant III
	y2040	LAO	-0.288924	0.125321	0.155523	Quadrant IV
	y2040	THA	0.119748	0.111157	0.0480423	Quadrant I
	y2040	KHM	0.00378115	0.20113	0.0668217	Quadrant I
	y2040	VNM	-0.255163	0.172135	0.213704	Quadrant IV
	y2040	RUS	0.000983785	0.274476	0.30687	Quadrant I
	y2040	PRK	0.298599	0.0933772	-1.30336	Quadrant II
	y2040	GRL	1.44712e-06	0.238525	0.337802	Quadrant I
	y2040	ISL	4.06899e-05	0.393711	0.476045	Quadrant I
	y2040	ESP	-0.0160205	0.150656	0.194644	Quadrant IV
	y2040	IRL	0.000192299	0.332705	0.360872	Quadrant I
	y2040	PRT	9.99964e-07	0.185072	0.399636	Quadrant I
	y2040	GBR	0.00139999	0.341274	0.218252	Quadrant I
	y2040	FRA	-0.642868	0.282037	0.276306	Quadrant IV
	y2040	BEL	0.00189857	0.386399	0.324524	Quadrant I
	y2040	NLD	0.0016713	0.351581	0.213542	Quadrant I
	y2040	NOR	-7.43543e-05	0.259751	0.399798	Quadrant IV
	y2040	LUX	0.00236386	0.167456	0.411526	Quadrant I
	y2040	DEU	-0.0832934	0.45854	0.304306	Quadrant IV
	y2040	CHE	-0.00166435	0.54292	0.338356	Quadrant IV
	y2040	ITA	-0.0590805	0.18236	0.206682	Quadrant IV
	y2040	DNK	0.00236385	0.26855	0.407464	Quadrant I
	y2040	AUT	-0.36376	0.427691	0.360607	Quadrant IV
	y2040	SWE	0.000368349	0.316858	0.154004	Quadrant I
	y2040	CZE	-0.059845	0.478449	0.240483	Quadrant IV
	y2040	HRV	-0.869762	0.282014	0.16004	Quadrant IV
	y2040	SVN	-0.916248	0.274924	0.175129	Quadrant IV
	y2040	SJM	1.05981e-06	0.238513	0.332712	Quadrant I
	y2040	POL	0.00233028	0.500738	0.215893	Quadrant I
	y2040	BIH	-0.00266761	0.144504	0.311215	Quadrant IV
	y2040	HUN	-0.945127	0.562175	0.2628	Quadrant IV
	y2040	SVK	-0.375358	0.560884	0.162029	Quadrant IV
	y2040	MNE	-0.0027031	0.240907	0.31685	Quadrant IV
	y2040	SRB	-0.0026939	0.368456	0.212506	Quadrant IV
	y2040	ALB	-0.00216377	0.199482	0.306408	Quadrant IV
	y2040	GRC	9.99851e-07	0.0949403	0.177199	Quadrant I
	y2040	MKD	-0.0023536	0.198605	0.118959	Quadrant IV
	y2040	ROU	-0.692714	0.286723	0.181519	Quadrant IV
	y2040	LTU	0.00236385	0.368937	0.344341	Quadrant I
	y2040	LVA	0.00230479	0.315124	0.334528	Quadrant I
	y2040	FIN	5.61592e-05	0.3528	0.258261	Quadrant I
	y2040	EST	0.00120694	0.313387	0.336216	Quadrant I
	y2040	BGR	-0.47799	0.442969	0.112666	Quadrant IV
	y2040	BLR	0.00422453	0.37322	0.353164	Quadrant I
	y2040	TUR	-0.000364917	0.0548791	-0.0133794	Quadrant III
	y2040	MDA	0.00493464	0.352636	0.158624	Quadrant I
	y2040	CYP	1.00023e-06	0.0851687	-0.0192466	Quadrant II
	y2040	IRN	0.000120412	0.06325	-0.362623	Quadrant II
	y2040	UKR	0.0049269	0.363207	0.258139	Quadrant I
	y2040	GEO	0.00340858	0.336404	-0.00624626	Quadrant II
	y2040	ARM	9.35934e-05	0.33047	0.160375	Quadrant I
	y2040	AZE	-0.000165771	0.244195	-0.112533	Quadrant III
	y2040	KAZ	0.000465826	0.347196	0.236624	Quadrant I
	y2040	TKM	-0.00033153	0.326487	0.3017	Quadrant IV
	y2040	UZB	-0.00069412	0.242567	0.125863	Quadrant IV
	y2040	AFG	0.00888738	0.426161	-0.963016	Quadrant II
	y2040	TJK	0.000826137	0.295042	-0.321988	Quadrant II
	y2040	KGZ	-0.000275833	0.34931	0.0977253	Quadrant IV
	y2040	MEX	0.048484	0.321564	-0.162049	Quadrant II
	y2040	USA	0.00810275	0.377233	0.266036	Quadrant I
	y2040	GTM	0.103316	0.252359	-0.766216	Quadrant II
	y2040	ECU	-0.00192041	0.470985	-0.169932	Quadrant III
	y2040	SLV	0.418897	0.266851	-0.452952	Quadrant II
	y2040	HND	0.131066	0.394649	-0.486323	Quadrant II
	y2040	BLZ	-0.0207258	0.17091	0.0160795	Quadrant IV
	y2040	NIC	0.114109	0.296739	-0.571198	Quadrant II
	y2040	CRI	0.0116967	0.297931	-0.166143	Quadrant II
	y2040	CUB	0.0130258	0.370276	-0.247787	Quadrant II
	y2040	PAN	0.0239405	0.261534	-0.0533086	Quadrant II
	y2040	PER	0.00153337	0.0822366	-0.196944	Quadrant II
	y2040	COL	0.010495	0.485262	-0.307308	Quadrant II
	y2040	BHS	-0.025321	0.1836	0.169468	Quadrant IV
	y2040	JAM	-0.00174995	0.128587	-0.19033	Quadrant III
	y2040	CHL	0.0150895	0.438902	-0.0366629	Quadrant II
	y2040	HTI	0.201926	0.212696	-0.549417	Quadrant II
	y2040	BRA	-0.0545401	0.335684	0.0538369	Quadrant IV
	y2040	ARG	0.00251015	0.625771	0.17042	Quadrant I
	y2040	VEN	0.000149256	0.327776	-0.387019	Quadrant II
	y2040	DOM	0.0443687	0.252266	-0.0840825	Quadrant II
	y2040	BOL	0.0150626	0.561453	-0.142762	Quadrant II
	y2040	PRY	0.00154537	0.390721	-0.100802	Quadrant II
	y2040	TTO	3.67272e-05	0.231053	-0.346194	Quadrant II
	y2040	FLK	1e-06	0.247112	0.208225	Quadrant I
	y2040	GUY	0.00633315	0.0864146	0.00684882	Quadrant I
	y2040	URY	0.012528	0.464921	0.0680853	Quadrant I
	y2040	SUR	3.56355e-05	0.256928	-0.280322	Quadrant II
	y2040	GUF	7.97789e-05	0.200378	0.00971493	Quadrant I
	y2040	SGS	1e-06	0.242302	0.18314	Quadrant I
	y2040	MAR	4.91104e-05	0.134713	-0.0491035	Quadrant II
	y2040	TUN	0.0059312	0.057509	-0.142004	Quadrant II
	y2040	SAU	0.0177513	0.117981	-0.105948	Quadrant II
	y2040	ISR	1.00026e-06	0.0370403	0.229422	Quadrant I
	y2040	JOR	9.98494e-07	0.175863	-0.131201	Quadrant II
	y2040	LBN	9.98998e-07	0.0624657	-0.0131574	Quadrant II
	y2040	SYR	1.00002e-06	0.198746	0.0595138	Quadrant I
	y2040	IRQ	4.20711e-05	0.177301	-0.92581	Quadrant II
	y2040	YEM	0.00916373	0.334341	-1.24274	Quadrant II
	y2040	KWT	9.98262e-07	0.108385	0.137195	Quadrant I
	y2040	QAT	-1.58881e-06	0.223458	0.351544	Quadrant IV
	y2040	OMN	0.0523922	0.0687857	0.138397	Quadrant I
	y2040	ARE	9.96854e-07	0.0185213	-0.165551	Quadrant II
	y2040	PAK	0.0239622	0.367096	-0.276348	Quadrant II
	y2040	CAN	0.00347639	0.281779	0.124641	Quadrant I
	y2040	PRI	-0.00358347	0.224833	0.138085	Quadrant IV
	y2040	AUS	-0.695961	0.375748	0.210278	Quadrant IV
	y2040	JPN	0.0163926	0.0503987	0.0366349	Quadrant I
	y2040	NZL	0.000673384	0.340813	0.216549	Quadrant I
	y2040	IDN	-0.0113635	0.111785	-0.271067	Quadrant III
	y2040	MYS	-0.00719913	0.107832	0.0741873	Quadrant IV
	y2040	SGP	-0.0083957	0.235935	0.357516	Quadrant IV
	y2040	BRN	-0.00839569	0.119586	0.0158176	Quadrant IV
	y2040	PHL	0.0357158	0.261233	0.0768691	Quadrant I
	y2040	TLS	0.0119594	0.350393	-0.325122	Quadrant II
	y2040	KOR	0.301687	0.06807	0.195878	Quadrant I
	y2040	PNG	-0.134249	0.219165	-0.0959098	Quadrant III
	y2040	SLB	-0.00839568	0.136622	0.00506638	Quadrant IV
	y2040	NCL	-0.254133	0.129765	0.253786	Quadrant IV
	y2040	VUT	-0.0083957	0.114888	0.154943	Quadrant IV
	y2040	FJI	-0.00100794	0.04976	0.103921	Quadrant IV
	y2040	REU	-0.00121837	0.212427	0.273871	Quadrant IV
	y2040	LKA	-0.261773	0.0255687	-0.301755	Quadrant III
	y2040	BGD	-0.241497	0.11521	-0.28915	Quadrant III
	y2040	BTN	0.161212	0.196347	0.268269	Quadrant I
	y2050	SEN	-0.0624674	0.0324398	-0.27753	Quadrant III
	y2050	GMB	0.0196501	0.11636	-0.284083	Quadrant II
	y2050	MRT	0.0167265	0.363573	-0.209473	Quadrant II
	y2050	ESH	-0.0294108	0.219226	-0.325436	Quadrant III
	y2050	GNB	0.0050706	0.491319	-0.0798121	Quadrant II
	y2050	GIN	-0.00443685	0.103123	0.121404	Quadrant IV
	y2050	SLE	-0.00488211	-0.00472139	-0.0784802	Quadrant III
	y2050	MLI	-0.0635528	0.355347	-0.182398	Quadrant III
	y2050	LBR	-0.00560097	0.236155	-0.327942	Quadrant III
	y2050	CIV	-0.00619315	0.191336	0.21043	Quadrant IV
	y2050	BFA	-0.0750809	0.110512	0.251318	Quadrant IV
	y2050	GHA	-0.00230331	0.198364	0.106461	Quadrant IV
	y2050	TGO	-0.0229194	0.0557636	-0.235397	Quadrant III
	y2050	NER	-0.0330576	0.0476134	-0.268149	Quadrant III
	y2050	BEN	0.0363914	0.00579737	-0.185385	Quadrant II
	y2050	DZA	-0.00832814	0.155248	-0.532094	Quadrant III
	y2050	NGA	-0.122063	0.0243518	-0.187849	Quadrant III
	y2050	CMR	-1.12587	0.0460142	0.0920025	Quadrant IV
	y2050	GAB	-0.000665237	0.244559	0.0672843	Quadrant IV
	y2050	GNQ	-0.00962405	0.282038	0.199876	Quadrant IV
	y2050	NAM	-0.0937512	0.350817	-0.0213409	Quadrant III
	y2050	AGO	-0.0107396	0.306652	-0.523584	Quadrant III
	y2050	COG	-0.00104178	0.218071	-0.173032	Quadrant III
	y2050	COD	-0.0168187	0.228326	-0.462512	Quadrant III
	y2050	LBY	-0.0100227	0.253166	0.270367	Quadrant IV
	y2050	TCD	-1.50963	0.0481008	-0.39756	Quadrant III
	y2050	CAF	-0.752239	0.384777	0.0470327	Quadrant IV
	y2050	ZAF	0.0484132	0.498649	0.0831901	Quadrant I
	y2050	BWA	-8.83486e-06	0.4144	-0.222343	Quadrant III
	y2050	ZMB	-0.0224265	0.0964702	-0.303562	Quadrant III
	y2050	SDN	0.0142811	0.411243	-0.10189	Quadrant II
	y2050	ZWE	-0.0981514	0.454216	-0.18263	Quadrant III
	y2050	LSO	-1.81159e-05	0.553937	-0.0579094	Quadrant III
	y2050	BDI	-0.00490609	0.222577	-0.539469	Quadrant III
	y2050	RWA	-0.00845231	0.238173	-0.0795136	Quadrant III
	y2050	TZA	0.0171669	0.072883	-0.124822	Quadrant II
	y2050	UGA	-0.00598471	0.161342	0.030954	Quadrant IV
	y2050	MOZ	-0.392702	0.246809	-0.194658	Quadrant III
	y2050	SWZ	0.0719399	0.46442	-0.349218	Quadrant II
	y2050	MWI	0.131721	0.150659	-0.30205	Quadrant II
	y2050	ETH	0.0219899	0.341815	-0.261796	Quadrant II
	y2050	EGY	-0.00736857	0.0471958	-0.0452969	Quadrant III
	y2050	KEN	0.00458006	0.37661	-0.231606	Quadrant II
	y2050	ERI	-0.0035042	0.24151	-0.65735	Quadrant III
	y2050	SOM	0.00210611	0.22305	-0.432576	Quadrant II
	y2050	DJI	0.0448971	0.354282	-0.132174	Quadrant II
	y2050	MDG	0.0535085	0.377164	-0.39327	Quadrant II
	y2050	MUS	0.000101	0.118938	-0.15154	Quadrant II
	y2050	ATF	0.000101	0.24294	0.151464	Quadrant I
	y2050	CHN	0.12157	0.177965	0.419871	Quadrant I
	y2050	IND	-0.0565046	0.0638809	-0.243205	Quadrant III
	y2050	NPL	-0.124186	0.164394	-0.403389	Quadrant III
	y2050	MNG	0.00571137	0.824099	0.41126	Quadrant I
	y2050	MMR	0.00497277	0.0194972	-0.0962591	Quadrant II
	y2050	LAO	-0.202875	0.161334	0.152036	Quadrant IV
	y2050	THA	0.175321	0.152977	-0.00689346	Quadrant II
	y2050	KHM	0.0325878	0.26197	0.0855746	Quadrant I
	y2050	VNM	-0.156904	0.253044	0.165815	Quadrant IV
	y2050	RUS	-6.50219e-05	0.373358	0.343283	Quadrant IV
	y2050	PRK	0.314178	0.0785383	-1.7913	Quadrant II
	y2050	GRL	6.91367e-07	0.31632	0.401761	Quadrant I
	y2050	ISL	-2.79205e-05	0.551178	0.533596	Quadrant IV
	y2050	ESP	-0.0164247	0.201193	0.324472	Quadrant IV
	y2050	IRL	0.00018764	0.434564	0.46207	Quadrant I
	y2050	PRT	9.9984e-07	0.259467	0.501149	Quadrant I
	y2050	GBR	0.00148308	0.462315	0.348657	Quadrant I
	y2050	FRA	-0.642366	0.386022	0.39946	Quadrant IV
	y2050	BEL	0.00205161	0.517278	0.439555	Quadrant I
	y2050	NLD	0.00180455	0.477223	0.347587	Quadrant I
	y2050	NOR	-3.86549e-05	0.351116	0.465526	Quadrant IV
	y2050	LUX	0.00255719	0.260624	0.506696	Quadrant I
	y2050	DEU	-0.0830121	0.618288	0.420252	Quadrant IV
	y2050	CHE	-0.000184818	0.742817	0.41251	Quadrant IV
	y2050	ITA	-0.059144	0.24561	0.342628	Quadrant IV
	y2050	DNK	0.00255718	0.384183	0.509823	Quadrant I
	y2050	AUT	-0.357401	0.587763	0.465791	Quadrant IV
	y2050	SWE	0.000376889	0.424382	0.29547	Quadrant I
	y2050	CZE	-0.0595289	0.655743	0.366653	Quadrant IV
	y2050	HRV	-0.869858	0.40419	0.302532	Quadrant IV
	y2050	SVN	-0.916595	0.383736	0.310946	Quadrant IV
	y2050	SJM	9.52622e-07	0.316888	0.397062	Quadrant I
	y2050	POL	0.00251964	0.689932	0.343938	Quadrant I
	y2050	BIH	-0.000274888	0.21157	0.408243	Quadrant IV
	y2050	HUN	-0.946276	0.805874	0.387996	Quadrant IV
	y2050	SVK	-0.371123	0.76991	0.299505	Quadrant IV
	y2050	MNE	-0.000278033	0.383617	0.401783	Quadrant IV
	y2050	SRB	-0.000277216	0.507644	0.305687	Quadrant IV
	y2050	ALB	-0.000224011	0.310981	0.393954	Quadrant IV
	y2050	GRC	1.00018e-06	0.150036	0.321934	Quadrant I
	y2050	MKD	-0.000243677	0.299831	0.23618	Quadrant IV
	y2050	ROU	-0.691711	0.408257	0.322453	Quadrant IV
	y2050	LTU	0.00255718	0.511414	0.450124	Quadrant I
	y2050	LVA	0.00249132	0.445355	0.44481	Quadrant I
	y2050	FIN	4.39629e-05	0.49927	0.384708	Quadrant I
	y2050	EST	0.00128385	0.442855	0.447798	Quadrant I
	y2050	BGR	-0.476449	0.603394	0.267437	Quadrant IV
	y2050	BLR	-0.000453465	0.521176	0.392336	Quadrant IV
	y2050	TUR	-3.82792e-05	0.081309	0.115311	Quadrant IV
	y2050	MDA	-0.00112307	0.482654	0.210389	Quadrant IV
	y2050	CYP	9.97526e-07	0.133529	0.148184	Quadrant I
	y2050	IRN	-0.000292171	0.0706258	-0.288943	Quadrant III
	y2050	UKR	-0.00106807	0.512915	0.322506	Quadrant IV
	y2050	GEO	-4.08982e-05	0.45101	0.0584602	Quadrant IV
	y2050	ARM	-0.00192456	0.496905	0.193373	Quadrant IV
	y2050	AZE	-0.0056855	0.299544	-0.060433	Quadrant III
	y2050	KAZ	0.000715239	0.480569	0.249431	Quadrant I
	y2050	TKM	-0.00399138	0.442012	0.312041	Quadrant IV
	y2050	UZB	-0.0075298	0.352155	0.173955	Quadrant IV
	y2050	AFG	0.0384634	0.471974	-0.667059	Quadrant II
	y2050	TJK	-0.00562843	0.458063	-0.131114	Quadrant III
	y2050	KGZ	-0.00517314	0.5299	0.18937	Quadrant IV
	y2050	MEX	0.0345844	0.436947	-0.162882	Quadrant II
	y2050	USA	0.00915736	0.499586	0.376572	Quadrant I
	y2050	GTM	0.0566216	0.360466	-0.705077	Quadrant II
	y2050	ECU	0.00695613	0.638109	-0.118257	Quadrant II
	y2050	SLV	0.229945	0.37476	-0.385437	Quadrant II
	y2050	HND	0.0347632	0.573482	-0.371977	Quadrant II
	y2050	BLZ	-0.0176734	0.258026	0.05509	Quadrant IV
	y2050	NIC	0.0458256	0.429447	-0.45096	Quadrant II
	y2050	CRI	-0.00213633	0.397636	-0.171097	Quadrant III
	y2050	CUB	0.0115727	0.519748	-0.245146	Quadrant II
	y2050	PAN	0.00021878	0.325252	-0.0535375	Quadrant II
	y2050	PER	0.0898483	0.114573	-0.182783	Quadrant II
	y2050	COL	0.0132773	0.649896	-0.300701	Quadrant II
	y2050	BHS	-0.02223	0.269462	0.149343	Quadrant IV
	y2050	JAM	0.000514534	0.176814	-0.163947	Quadrant II
	y2050	CHL	0.0368204	0.613067	-0.0414608	Quadrant II
	y2050	HTI	0.130479	0.318028	-0.312316	Quadrant II
	y2050	BRA	0.119959	0.451473	0.0508849	Quadrant I
	y2050	ARG	0.425118	0.867722	0.187148	Quadrant I
	y2050	VEN	0.367173	0.435262	-0.357068	Quadrant II
	y2050	DOM	0.02004	0.328864	-0.104166	Quadrant II
	y2050	BOL	0.0673818	0.805771	-0.0722728	Quadrant II
	y2050	PRY	0.097326	0.552776	-0.0894506	Quadrant II
	y2050	TTO	0.0959241	0.294888	-0.398544	Quadrant II
	y2050	FLK	1e-06	0.327583	0.170911	Quadrant I
	y2050	GUY	0.0687928	0.139139	-0.018274	Quadrant II
	y2050	URY	0.512872	0.641846	0.0822409	Quadrant I
	y2050	SUR	4.33335e-05	0.33827	-0.239889	Quadrant II
	y2050	GUF	0.000108339	0.244337	-0.0483538	Quadrant II
	y2050	SGS	1e-06	0.318834	0.150973	Quadrant I
	y2050	MAR	6.35825e-05	0.145622	0.0502722	Quadrant I
	y2050	TUN	-0.0477063	0.0708761	-0.0829913	Quadrant III
	y2050	SAU	-0.0347475	0.14045	-0.0663008	Quadrant III
	y2050	ISR	1.00127e-06	0.0559656	0.27251	Quadrant I
	y2050	JOR	1.00115e-06	0.248393	0.00292453	Quadrant I
	y2050	LBN	2.15286e-05	0.106477	0.0572793	Quadrant I
	y2050	SYR	-7.24152e-05	0.269983	0.164809	Quadrant IV
	y2050	IRQ	0.000426663	0.194693	-0.789991	Quadrant II
	y2050	YEM	-0.0151933	0.368565	-0.678561	Quadrant III
	y2050	KWT	9.98955e-07	0.143279	0.180028	Quadrant I
	y2050	QAT	2.54215e-06	0.303319	0.343783	Quadrant I
	y2050	OMN	-0.0870726	0.0769297	0.132276	Quadrant IV
	y2050	ARE	9.75226e-07	0.00795098	-0.17122	Quadrant II
	y2050	PAK	0.0380605	0.510986	-0.247715	Quadrant II
	y2050	CAN	-0.000185238	0.368631	0.0111023	Quadrant IV
	y2050	PRI	-0.000924763	0.296339	0.112831	Quadrant IV
	y2050	AUS	-1.51294	0.505614	0.110434	Quadrant IV
	y2050	JPN	-0.0627008	0.0569049	0.0413906	Quadrant IV
	y2050	NZL	-3.46677e-05	0.473095	0.121211	Quadrant IV
	y2050	IDN	-0.00248877	0.110219	-0.322654	Quadrant III
	y2050	MYS	0.00280425	0.141872	-0.0111897	Quadrant II
	y2050	SGP	0.00325418	0.313931	0.294226	Quadrant I
	y2050	BRN	0.00325418	0.143476	-0.0988656	Quadrant II
	y2050	PHL	0.0709549	0.333795	0.0352899	Quadrant I
	y2050	TLS	-0.000804518	0.482815	-0.163258	Quadrant III
	y2050	KOR	0.317679	0.0857899	0.121239	Quadrant I
	y2050	PNG	-0.0934646	0.319321	0.00190146	Quadrant IV
	y2050	SLB	0.00325417	0.219604	0.0872878	Quadrant I
	y2050	NCL	-0.242152	0.180488	0.17703	Quadrant IV
	y2050	VUT	0.00325419	0.218429	0.19132	Quadrant I
	y2050	FJI	0.00487895	0.0900214	0.071917	Quadrant I
	y2050	REU	-0.000332767	0.264559	0.156994	Quadrant IV
	y2050	LKA	-0.165408	0.0386142	-0.309834	Quadrant III
	y2050	BGD	-0.120529	0.105917	-0.266297	Quadrant III
	y2050	BTN	0.16496	0.267046	0.235274	Quadrant I
	y2060	SEN	-0.125237	0.0559535	-0.0433555	Quadrant III
	y2060	GMB	-0.0172155	0.115074	-0.0395883	Quadrant III
	y2060	MRT	-0.018808	0.381574	-0.0582576	Quadrant III
	y2060	ESH	-0.0285704	0.216692	-0.260237	Quadrant III
	y2060	GNB	-0.00251012	0.581437	0.138761	Quadrant IV
	y2060	GIN	0.013184	0.125015	0.248918	Quadrant I
	y2060	SLE	0.188173	0.0212883	0.176511	Quadrant I
	y2060	MLI	-0.118734	0.32783	0.0141796	Quadrant IV
	y2060	LBR	0.20812	0.24223	0.000903133	Quadrant I
	y2060	CIV	-0.0467177	0.205544	0.319963	Quadrant IV
	y2060	BFA	-0.146453	0.0966024	0.399913	Quadrant IV
	y2060	GHA	-0.0289338	0.206448	0.255374	Quadrant IV
	y2060	TGO	-0.0894148	0.0844338	0.0382869	Quadrant IV
	y2060	NER	-0.08016	0.0525368	-0.0390782	Quadrant III
	y2060	BEN	0.0186831	0.0116258	0.0387244	Quadrant I
	y2060	DZA	0.00810228	0.15505	-0.350548	Quadrant II
	y2060	NGA	-0.12874	0.03616	0.0366534	Quadrant IV
	y2060	CMR	-0.0369454	0.063488	0.24083	Quadrant IV
	y2060	GAB	-0.00089672	0.248306	0.166492	Quadrant IV
	y2060	GNQ	0.0116647	0.28683	0.279526	Quadrant I
	y2060	NAM	0.00591404	0.34989	0.101675	Quadrant I
	y2060	AGO	0.0176471	0.290578	-0.139246	Quadrant II
	y2060	COG	0.107069	0.234745	0.032426	Quadrant I
	y2060	COD	-0.0101777	0.222483	-0.0825036	Quadrant III
	y2060	LBY	-0.00383131	0.250769	0.312317	Quadrant IV
	y2060	TCD	-0.0960124	0.0697181	-0.0805925	Quadrant III
	y2060	CAF	-0.0264741	0.408663	0.231316	Quadrant IV
	y2060	ZAF	0.00750245	0.490762	0.171349	Quadrant I
	y2060	BWA	0.000357316	0.413037	-0.117468	Quadrant II
	y2060	ZMB	-0.0123031	0.112212	-0.0197528	Quadrant III
	y2060	SDN	0.0342604	0.464264	0.0777084	Quadrant I
	y2060	ZWE	0.00363281	0.501145	0.0863	Quadrant I
	y2060	LSO	5.48497e-05	0.580435	0.1511	Quadrant I
	y2060	BDI	0.0399249	0.21186	-0.117475	Quadrant II
	y2060	RWA	0.0605178	0.240914	0.115899	Quadrant I
	y2060	TZA	0.00654087	0.094106	0.0831866	Quadrant I
	y2060	UGA	0.048168	0.210483	0.226171	Quadrant I
	y2060	MOZ	-0.0134772	0.275738	0.0666881	Quadrant IV
	y2060	SWZ	0.0190212	0.46679	-0.173856	Quadrant II
	y2060	MWI	0.165344	0.164443	0.0177748	Quadrant I
	y2060	ETH	0.0250976	0.382351	-0.0221639	Quadrant II
	y2060	EGY	-0.00653912	0.0405418	0.0483184	Quadrant IV
	y2060	KEN	0.0104007	0.408387	-0.0358114	Quadrant II
	y2060	ERI	-0.0105223	0.22849	-0.40402	Quadrant III
	y2060	SOM	0.00211313	0.226915	-0.416034	Quadrant II
	y2060	DJI	4.63879e-05	0.36633	-0.0192815	Quadrant II
	y2060	MDG	-0.00355717	0.351909	-0.0817553	Quadrant III
	y2060	MUS	0.000101	0.114536	-0.0472672	Quadrant II
	y2060	ATF	0.000101	0.238534	0.171813	Quadrant I
	y2060	CHN	0.126588	0.181656	0.419187	Quadrant I
	y2060	IND	-0.0195547	0.0758943	-0.10538	Quadrant III
	y2060	NPL	-0.106598	0.162907	-0.225268	Quadrant III
	y2060	MNG	-0.071507	0.840534	0.453708	Quadrant IV
	y2060	MMR	-0.0275498	0.0401896	-0.00650531	Quadrant III
	y2060	LAO	-0.160871	0.171081	0.227471	Quadrant IV
	y2060	THA	0.0732528	0.162051	0.0443765	Quadrant I
	y2060	KHM	-0.0103038	0.280112	0.184548	Quadrant IV
	y2060	VNM	-0.121106	0.259624	0.218036	Quadrant IV
	y2060	RUS	-9.61506e-05	0.369968	0.350739	Quadrant IV
	y2060	PRK	0.101225	0.0856328	-2.05064	Quadrant II
	y2060	GRL	9.69506e-07	0.309892	0.346535	Quadrant I
	y2060	ISL	-1.10499e-06	0.547433	0.495778	Quadrant IV
	y2060	ESP	-0.0155107	0.20401	0.313309	Quadrant IV
	y2060	IRL	0.000132934	0.425765	0.446525	Quadrant I
	y2060	PRT	1.00025e-06	0.258129	0.491607	Quadrant I
	y2060	GBR	0.00106322	0.460855	0.335012	Quadrant I
	y2060	FRA	-0.63244	0.386028	0.389106	Quadrant IV
	y2060	BEL	0.00149253	0.510295	0.427453	Quadrant I
	y2060	NLD	0.0013189	0.471759	0.331824	Quadrant I
	y2060	NOR	-5.38478e-05	0.346178	0.419447	Quadrant IV
	y2060	LUX	0.00184532	0.261236	0.489984	Quadrant I
	y2060	DEU	-0.0777571	0.614647	0.406662	Quadrant IV
	y2060	CHE	-0.00076152	0.741549	0.364168	Quadrant IV
	y2060	ITA	-0.0594924	0.243795	0.330924	Quadrant IV
	y2060	DNK	0.00184534	0.380021	0.497499	Quadrant I
	y2060	AUT	-0.338391	0.581916	0.451486	Quadrant IV
	y2060	SWE	0.000270152	0.42185	0.279372	Quadrant I
	y2060	CZE	-0.0585361	0.654842	0.353814	Quadrant IV
	y2060	HRV	-0.785002	0.402494	0.289326	Quadrant IV
	y2060	SVN	-0.714479	0.382161	0.299868	Quadrant IV
	y2060	SJM	9.88002e-07	0.311078	0.341736	Quadrant I
	y2060	POL	0.0018174	0.689509	0.329016	Quadrant I
	y2060	BIH	-0.0011902	0.216128	0.37331	Quadrant IV
	y2060	HUN	-0.95633	0.816256	0.375233	Quadrant IV
	y2060	SVK	-0.363786	0.760891	0.281583	Quadrant IV
	y2060	MNE	-0.00120503	0.392108	0.363171	Quadrant IV
	y2060	SRB	-0.00120118	0.51154	0.254659	Quadrant IV
	y2060	ALB	-0.000980554	0.315317	0.354685	Quadrant IV
	y2060	GRC	1.00008e-06	0.153511	0.31409	Quadrant I
	y2060	MKD	-0.0010652	0.304258	0.186074	Quadrant IV
	y2060	ROU	-0.693265	0.411671	0.314813	Quadrant IV
	y2060	LTU	0.00184534	0.512178	0.437491	Quadrant I
	y2060	LVA	0.00179618	0.443528	0.43574	Quadrant I
	y2060	FIN	3.30793e-05	0.504565	0.373335	Quadrant I
	y2060	EST	0.000912364	0.445401	0.440047	Quadrant I
	y2060	BGR	-0.47063	0.603372	0.259806	Quadrant IV
	y2060	BLR	-0.000430076	0.520166	0.399335	Quadrant IV
	y2060	TUR	-0.000176546	0.0832648	0.0551111	Quadrant IV
	y2060	MDA	-0.00108732	0.488031	0.223219	Quadrant IV
	y2060	CYP	1.00742e-06	0.133989	0.129766	Quadrant I
	y2060	IRN	-0.000844701	0.066557	-0.188113	Quadrant III
	y2060	UKR	-0.00103352	0.518988	0.341249	Quadrant IV
	y2060	GEO	-6.68067e-05	0.452703	0.0771731	Quadrant IV
	y2060	ARM	-0.00160956	0.502251	0.199301	Quadrant IV
	y2060	AZE	-0.00527566	0.297351	-0.0202773	Quadrant III
	y2060	KAZ	0.00117428	0.472241	0.242779	Quadrant I
	y2060	TKM	-0.00386413	0.429464	0.308397	Quadrant IV
	y2060	UZB	-0.00726027	0.357178	0.192432	Quadrant IV
	y2060	AFG	0.00263661	0.468583	-0.311756	Quadrant II
	y2060	TJK	-0.00533284	0.491027	-0.0519633	Quadrant III
	y2060	KGZ	-0.00485473	0.556576	0.230218	Quadrant IV
	y2060	MEX	0.10205	0.44692	-0.00874089	Quadrant II
	y2060	USA	0.0191347	0.494381	0.354186	Quadrant I
	y2060	GTM	0.0980948	0.38993	-0.41968	Quadrant II
	y2060	ECU	0.029821	0.646591	0.047734	Quadrant I
	y2060	SLV	0.386084	0.397179	-0.166669	Quadrant II
	y2060	HND	0.109006	0.61532	-0.129413	Quadrant II
	y2060	BLZ	-0.0203865	0.277964	0.199323	Quadrant IV
	y2060	NIC	0.107284	0.464865	-0.191033	Quadrant II
	y2060	CRI	-0.00487773	0.403602	-0.0272622	Quadrant III
	y2060	CUB	0.0138162	0.544464	-0.0751228	Quadrant II
	y2060	PAN	5.71423e-05	0.321312	0.0705677	Quadrant I
	y2060	PER	0.10078	0.12297	-0.0251693	Quadrant II
	y2060	COL	-0.00104248	0.657283	-0.131293	Quadrant III
	y2060	BHS	-0.0249488	0.266575	0.242138	Quadrant IV
	y2060	JAM	-0.00139	0.191808	0.00968331	Quadrant IV
	y2060	CHL	0.0401434	0.618413	0.0828203	Quadrant I
	y2060	HTI	0.207758	0.371069	-0.0183157	Quadrant II
	y2060	BRA	0.0217892	0.459767	0.169247	Quadrant I
	y2060	ARG	0.246511	0.863207	0.290208	Quadrant I
	y2060	VEN	-0.000757602	0.444446	-0.165567	Quadrant III
	y2060	DOM	0.0476085	0.329377	0.0257229	Quadrant I
	y2060	BOL	0.136718	0.841053	0.0983373	Quadrant I
	y2060	PRY	0.0206677	0.573277	0.0602481	Quadrant I
	y2060	TTO	2.37763e-05	0.295228	-0.2413	Quadrant II
	y2060	FLK	1e-06	0.321623	0.25567	Quadrant I
	y2060	GUY	0.00518974	0.146758	0.0999208	Quadrant I
	y2060	URY	0.131826	0.640053	0.195947	Quadrant I
	y2060	SUR	7.3246e-05	0.341864	-0.06514	Quadrant II
	y2060	GUF	0.000390876	0.235778	0.0403074	Quadrant I
	y2060	SGS	1e-06	0.313051	0.237288	Quadrant I
	y2060	MAR	6.27661e-05	0.135861	0.146128	Quadrant I
	y2060	TUN	-0.0407772	0.0706069	0.0142691	Quadrant IV
	y2060	SAU	-0.0984356	0.134782	-0.0389944	Quadrant III
	y2060	ISR	9.99392e-07	0.054982	0.308403	Quadrant I
	y2060	JOR	9.99909e-07	0.257688	0.0920815	Quadrant I
	y2060	LBN	2.03357e-05	0.108252	0.139844	Quadrant I
	y2060	SYR	-7.94559e-05	0.28124	0.250286	Quadrant IV
	y2060	IRQ	0.00048618	0.189476	-0.678257	Quadrant II
	y2060	YEM	-0.0370298	0.363504	-0.314106	Quadrant III
	y2060	KWT	9.99617e-07	0.13913	0.201533	Quadrant I
	y2060	QAT	2.56807e-06	0.299091	0.375226	Quadrant I
	y2060	OMN	-0.267692	0.0733207	0.186943	Quadrant IV
	y2060	ARE	9.95863e-07	0.00314771	-0.138591	Quadrant II
	y2060	PAK	0.0145962	0.544745	-0.114055	Quadrant II
	y2060	CAN	-0.00353544	0.362414	0.270388	Quadrant IV
	y2060	PRI	-0.00331815	0.294802	0.208409	Quadrant IV
	y2060	AUS	-1.37412	0.49716	0.346265	Quadrant IV
	y2060	JPN	-0.111322	0.0583224	0.0839879	Quadrant IV
	y2060	NZL	-0.000669494	0.468294	0.356031	Quadrant IV
	y2060	IDN	0.0142794	0.110315	-0.23981	Quadrant II
	y2060	MYS	0.0307855	0.144687	0.0219672	Quadrant I
	y2060	SGP	0.0355517	0.308199	0.306451	Quadrant I
	y2060	BRN	0.0355517	0.140512	-0.0782161	Quadrant II
	y2060	PHL	0.0438281	0.343301	0.108362	Quadrant I
	y2060	TLS	-0.0028709	0.526829	0.0152307	Quadrant IV
	y2060	KOR	0.103733	0.0844996	0.142524	Quadrant I
	y2060	PNG	-0.0737944	0.355853	0.133187	Quadrant IV
	y2060	SLB	0.0355517	0.258887	0.210312	Quadrant I
	y2060	NCL	-0.126127	0.173867	0.194292	Quadrant IV
	y2060	VUT	0.0355517	0.266832	0.280236	Quadrant I
	y2060	FJI	0.0327631	0.105321	0.148683	Quadrant I
	y2060	REU	0.000882011	0.258065	0.203141	Quadrant I
	y2060	LKA	-0.106636	0.0480623	-0.199451	Quadrant III
	y2060	BGD	-0.0619262	0.100673	-0.129762	Quadrant III
	y2060	BTN	0.0683436	0.271647	0.277025	Quadrant I
	y2070	SEN	-0.0550051	0.0559535	0.0349211	Quadrant IV
	y2070	GMB	-0.0450159	0.115074	0.0403326	Quadrant IV
	y2070	MRT	0.0753251	0.381574	-0.0110916	Quadrant II
	y2070	ESH	-0.0277768	0.216692	-0.259915	Quadrant III
	y2070	GNB	0.0160492	0.581437	0.200203	Quadrant I
	y2070	GIN	0.0510671	0.125015	0.271706	Quadrant I
	y2070	SLE	0.323053	0.0212883	0.268713	Quadrant I
	y2070	MLI	0.4108	0.32783	0.088584	Quadrant I
	y2070	LBR	0.350935	0.24223	0.113436	Quadrant I
	y2070	CIV	-0.0896172	0.205544	0.337648	Quadrant IV
	y2070	BFA	0.383286	0.0966024	0.451613	Quadrant I
	y2070	GHA	-0.0554904	0.206448	0.296996	Quadrant IV
	y2070	TGO	-0.1241	0.0844338	0.14484	Quadrant IV
	y2070	NER	-0.201684	0.0525368	0.0704479	Quadrant IV
	y2070	BEN	-0.00618757	0.0116258	0.119795	Quadrant IV
	y2070	DZA	0.0091682	0.15505	-0.259622	Quadrant II
	y2070	NGA	-0.307633	0.03616	0.109137	Quadrant IV
	y2070	CMR	-0.0337243	0.063488	0.282283	Quadrant IV
	y2070	GAB	0.000547898	0.248306	0.173823	Quadrant I
	y2070	GNQ	0.0646194	0.28683	0.281313	Quadrant I
	y2070	NAM	0.00182902	0.34989	0.121766	Quadrant I
	y2070	AGO	0.0122667	0.290578	0.0061242	Quadrant I
	y2070	COG	0.218119	0.234745	0.0799684	Quadrant I
	y2070	COD	-0.0126645	0.222483	0.053408	Quadrant IV
	y2070	LBY	0.000512184	0.250769	0.312517	Quadrant I
	y2070	TCD	0.353461	0.0697181	0.0352835	Quadrant I
	y2070	CAF	-0.0881879	0.408663	0.303718	Quadrant IV
	y2070	ZAF	0.00501959	0.490762	0.174411	Quadrant I
	y2070	BWA	0.00046026	0.413037	-0.122666	Quadrant II
	y2070	ZMB	-0.00390057	0.112212	0.0783758	Quadrant IV
	y2070	SDN	0.0340357	0.464264	0.193713	Quadrant I
	y2070	ZWE	-0.00565297	0.501145	0.193622	Quadrant IV
	y2070	LSO	-9.62542e-06	0.580435	0.218957	Quadrant IV
	y2070	BDI	-0.000259057	0.21186	0.0395212	Quadrant IV
	y2070	RWA	-0.00082043	0.240914	0.181379	Quadrant IV
	y2070	TZA	-0.0158709	0.094106	0.156406	Quadrant IV
	y2070	UGA	-0.00681959	0.210483	0.29487	Quadrant IV
	y2070	MOZ	-0.0146264	0.275738	0.149317	Quadrant IV
	y2070	SWZ	0.00713601	0.46679	-0.124897	Quadrant II
	y2070	MWI	0.0381062	0.164443	0.146771	Quadrant I
	y2070	ETH	0.0145652	0.382351	0.0673827	Quadrant I
	y2070	EGY	0.00064414	0.0405418	0.0771445	Quadrant I
	y2070	KEN	-0.109105	0.408387	0.0322949	Quadrant IV
	y2070	ERI	-0.040101	0.22849	-0.258705	Quadrant III
	y2070	SOM	-0.0172721	0.226915	-0.515985	Quadrant III
	y2070	DJI	9.90763e-05	0.36633	0.00117736	Quadrant I
	y2070	MDG	-0.00435904	0.351909	0.0366289	Quadrant IV
	y2070	MUS	0.000101	0.114536	-0.0467906	Quadrant II
	y2070	ATF	0.000101	0.238534	0.182235	Quadrant I
	y2070	CHN	0.172832	0.181656	0.423238	Quadrant I
	y2070	IND	0.00601418	0.0758943	-0.0163483	Quadrant II
	y2070	NPL	-0.0466476	0.162907	-0.0948589	Quadrant III
	y2070	MNG	-0.000334467	0.840534	0.467335	Quadrant IV
	y2070	MMR	-0.0771436	0.0401896	0.0644765	Quadrant IV
	y2070	LAO	-0.10204	0.171081	0.284184	Quadrant IV
	y2070	THA	0.0351266	0.162051	0.0809521	Quadrant I
	y2070	KHM	-0.0600077	0.280112	0.251265	Quadrant IV
	y2070	VNM	-0.0535038	0.259624	0.256361	Quadrant IV
	y2070	RUS	-0.000298284	0.369968	0.35173	Quadrant IV
	y2070	PRK	0.0587691	0.0856328	-2.27512	Quadrant II
	y2070	GRL	1.00716e-06	0.309892	0.357349	Quadrant I
	y2070	ISL	3.63294e-06	0.547433	0.510938	Quadrant I
	y2070	ESP	-0.0130149	0.20401	0.302163	Quadrant IV
	y2070	IRL	0.00382755	0.425765	0.43094	Quadrant I
	y2070	PRT	1.0002e-06	0.258129	0.483027	Quadrant I
	y2070	GBR	0.00190073	0.460855	0.322758	Quadrant I
	y2070	FRA	-0.613589	0.386028	0.377803	Quadrant IV
	y2070	BEL	0.00147744	0.510295	0.414811	Quadrant I
	y2070	NLD	0.00126256	0.471759	0.313571	Quadrant I
	y2070	NOR	0.0162186	0.346178	0.435469	Quadrant I
	y2070	LUX	0.00173625	0.261236	0.475624	Quadrant I
	y2070	DEU	-0.0676696	0.614647	0.394808	Quadrant IV
	y2070	CHE	0.138445	0.741549	0.385451	Quadrant I
	y2070	ITA	-0.0592225	0.243795	0.317628	Quadrant IV
	y2070	DNK	0.00173625	0.380021	0.486268	Quadrant I
	y2070	AUT	-0.295533	0.581916	0.439594	Quadrant IV
	y2070	SWE	0.00281159	0.42185	0.265996	Quadrant I
	y2070	CZE	-0.0565388	0.654842	0.343386	Quadrant IV
	y2070	HRV	-0.539525	0.402494	0.275942	Quadrant IV
	y2070	SVN	-0.296146	0.382161	0.286565	Quadrant IV
	y2070	SJM	1.01733e-06	0.311078	0.35437	Quadrant I
	y2070	POL	0.001772	0.689509	0.319676	Quadrant I
	y2070	BIH	0.173514	0.216128	0.400918	Quadrant I
	y2070	HUN	-1.0476	0.816256	0.363324	Quadrant IV
	y2070	SVK	-0.357788	0.760891	0.267723	Quadrant IV
	y2070	MNE	0.174478	0.392108	0.393072	Quadrant I
	y2070	SRB	0.174229	0.51154	0.281721	Quadrant I
	y2070	ALB	0.158911	0.315317	0.387177	Quadrant I
	y2070	GRC	9.99943e-07	0.153511	0.303122	Quadrant I
	y2070	MKD	0.165357	0.304258	0.226223	Quadrant I
	y2070	ROU	-0.719386	0.411671	0.306839	Quadrant IV
	y2070	LTU	0.00173625	0.512178	0.432829	Quadrant I
	y2070	LVA	0.00179921	0.443528	0.428398	Quadrant I
	y2070	FIN	0.00370708	0.504565	0.363537	Quadrant I
	y2070	EST	0.00289982	0.445401	0.431867	Quadrant I
	y2070	BGR	-0.455528	0.603372	0.246494	Quadrant IV
	y2070	BLR	-0.000453086	0.520166	0.400895	Quadrant IV
	y2070	TUR	0.0503167	0.0832648	0.0973873	Quadrant I
	y2070	MDA	-0.0010882	0.488031	0.232661	Quadrant IV
	y2070	CYP	1.01289e-06	0.133989	0.117507	Quadrant I
	y2070	IRN	-0.00104459	0.066557	-0.186558	Quadrant III
	y2070	UKR	-0.00103558	0.518988	0.349891	Quadrant IV
	y2070	GEO	-0.000111421	0.452703	0.0874422	Quadrant IV
	y2070	ARM	-0.0041604	0.502251	0.203193	Quadrant IV
	y2070	AZE	-0.010426	0.297351	0.01404	Quadrant IV
	y2070	KAZ	-0.00019554	0.472241	0.235448	Quadrant IV
	y2070	TKM	-0.00711726	0.429464	0.30212	Quadrant IV
	y2070	UZB	-0.0132492	0.357178	0.207326	Quadrant IV
	y2070	AFG	0.00193472	0.468583	-0.110507	Quadrant II
	y2070	TJK	-0.0110574	0.491027	-0.00791229	Quadrant III
	y2070	KGZ	-0.00934321	0.556576	0.2551	Quadrant IV
	y2070	MEX	-0.0504552	0.44692	0.00907032	Quadrant IV
	y2070	USA	0.0226705	0.494381	0.35431	Quadrant I
	y2070	GTM	-0.00780644	0.38993	-0.352794	Quadrant III
	y2070	ECU	0.00161213	0.646591	0.0755272	Quadrant I
	y2070	SLV	0.0678016	0.397179	-0.121441	Quadrant II
	y2070	HND	-0.0965406	0.61532	-0.0687985	Quadrant III
	y2070	BLZ	-0.0216126	0.277964	0.22721	Quadrant IV
	y2070	NIC	-0.0780764	0.464865	-0.132069	Quadrant III
	y2070	CRI	-0.0172669	0.403602	-0.0140666	Quadrant III
	y2070	CUB	0.00284184	0.544464	-0.0451846	Quadrant II
	y2070	PAN	-0.0165981	0.321312	0.0709445	Quadrant IV
	y2070	PER	0.0630665	0.12297	-0.00763827	Quadrant II
	y2070	COL	-0.00303803	0.657283	-0.112327	Quadrant III
	y2070	BHS	-0.0261769	0.266575	0.245176	Quadrant IV
	y2070	JAM	-0.00223154	0.191808	0.0445303	Quadrant IV
	y2070	CHL	0.0376659	0.618413	0.0893409	Quadrant I
	y2070	HTI	0.055269	0.371069	0.0701714	Quadrant I
	y2070	BRA	0.018508	0.459767	0.177241	Quadrant I
	y2070	ARG	0.0930979	0.863207	0.295681	Quadrant I
	y2070	VEN	0.152835	0.444446	-0.140453	Quadrant II
	y2070	DOM	-0.0182928	0.329377	0.0312603	Quadrant IV
	y2070	BOL	0.0189744	0.841053	0.128272	Quadrant I
	y2070	PRY	0.0409753	0.573277	0.0827659	Quadrant I
	y2070	TTO	0.0384394	0.295228	-0.246136	Quadrant II
	y2070	FLK	1e-06	0.321623	0.251977	Quadrant I
	y2070	GUY	0.0259145	0.146758	0.1116	Quadrant I
	y2070	URY	0.207335	0.640053	0.199754	Quadrant I
	y2070	SUR	1.50946e-06	0.341864	-0.041596	Quadrant II
	y2070	GUF	-0.000139841	0.235778	0.0208608	Quadrant IV
	y2070	SGS	1e-06	0.313051	0.232923	Quadrant I
	y2070	MAR	6.33713e-05	0.135861	0.163163	Quadrant I
	y2070	TUN	0.00376426	0.0706069	0.0390368	Quadrant I
	y2070	SAU	-0.111313	0.134782	-0.0929564	Quadrant III
	y2070	ISR	9.98599e-07	0.054982	0.287432	Quadrant I
	y2070	JOR	9.99512e-07	0.257688	0.0887579	Quadrant I
	y2070	LBN	1.89656e-05	0.108252	0.150228	Quadrant I
	y2070	SYR	-7.21791e-05	0.28124	0.272849	Quadrant IV
	y2070	IRQ	0.000488755	0.189476	-0.700357	Quadrant II
	y2070	YEM	-0.0411426	0.363504	-0.183749	Quadrant III
	y2070	KWT	9.98848e-07	0.13913	0.148907	Quadrant I
	y2070	QAT	-2.98576e-07	0.299091	0.367153	Quadrant IV
	y2070	OMN	-0.312055	0.0733207	0.185628	Quadrant IV
	y2070	ARE	9.81242e-07	0.00314771	-0.191399	Quadrant II
	y2070	PAK	0.012276	0.544745	-0.0264228	Quadrant II
	y2070	CAN	-0.0029703	0.362414	0.26447	Quadrant IV
	y2070	PRI	-0.00441852	0.294802	0.208341	Quadrant IV
	y2070	AUS	-1.24819	0.49716	0.341891	Quadrant IV
	y2070	JPN	-0.126859	0.0583224	0.0812788	Quadrant IV
	y2070	NZL	-0.000560874	0.468294	0.352297	Quadrant IV
	y2070	IDN	0.0766791	0.110315	-0.178872	Quadrant II
	y2070	MYS	0.105425	0.144687	0.0457168	Quadrant I
	y2070	SGP	0.119669	0.308199	0.312643	Quadrant I
	y2070	BRN	0.119669	0.140512	-0.062626	Quadrant II
	y2070	PHL	0.0789306	0.343301	0.162665	Quadrant I
	y2070	TLS	0.0507445	0.526829	0.115263	Quadrant I
	y2070	KOR	0.0600867	0.0844996	0.158158	Quadrant I
	y2070	PNG	-0.0118367	0.355853	0.205761	Quadrant IV
	y2070	SLB	0.119669	0.258887	0.282663	Quadrant I
	y2070	NCL	-0.155962	0.173867	0.201675	Quadrant IV
	y2070	VUT	0.119669	0.266832	0.329038	Quadrant I
	y2070	FJI	0.0994235	0.105321	0.1956	Quadrant I
	y2070	REU	-0.000165755	0.258065	0.17533	Quadrant IV
	y2070	LKA	-0.0354795	0.0480623	-0.134929	Quadrant III
	y2070	BGD	0.00302633	0.100673	-0.0293785	Quadrant II
	y2070	BTN	0.0778219	0.271647	0.300945	Quadrant I
	y2080	SEN	-0.0600213	0.0745933	0.113243	Quadrant IV
	y2080	GMB	-0.81444	0.128913	0.115026	Quadrant IV
	y2080	MRT	0.00357685	0.393753	0.0561452	Quadrant I
	y2080	ESH	-0.0294108	0.214169	-0.244239	Quadrant III
	y2080	GNB	-0.81511	0.632378	0.261399	Quadrant IV
	y2080	GIN	-0.375777	0.135846	0.305283	Quadrant IV
	y2080	SLE	0.461785	0.044621	0.339833	Quadrant I
	y2080	MLI	0.0759716	0.309258	0.175199	Quadrant I
	y2080	LBR	0.520523	0.250365	0.203941	Quadrant I
	y2080	CIV	-0.324073	0.211596	0.364049	Quadrant IV
	y2080	BFA	0.0350838	0.0936874	0.498207	Quadrant I
	y2080	GHA	-0.22667	0.212118	0.339526	Quadrant IV
	y2080	TGO	-0.362731	0.114349	0.238298	Quadrant IV
	y2080	NER	-0.0880057	0.0673202	0.181276	Quadrant IV
	y2080	BEN	-0.232798	0.0195291	0.201506	Quadrant IV
	y2080	DZA	0.0092723	0.154784	-0.198289	Quadrant II
	y2080	NGA	-0.14321	0.0454079	0.17539	Quadrant IV
	y2080	CMR	0.0676281	0.0757606	0.325313	Quadrant I
	y2080	GAB	0.000630278	0.249342	0.198018	Quadrant I
	y2080	GNQ	0.142283	0.28832	0.299614	Quadrant I
	y2080	NAM	-0.0115206	0.34396	0.157542	Quadrant IV
	y2080	AGO	0.0361165	0.279427	0.118499	Quadrant I
	y2080	COG	0.387759	0.24342	0.128428	Quadrant I
	y2080	COD	0.00281216	0.244654	0.159738	Quadrant I
	y2080	LBY	9.01886e-05	0.2486	0.323215	Quadrant I
	y2080	TCD	0.250585	0.0975129	0.137351	Quadrant I
	y2080	CAF	0.231624	0.411539	0.374065	Quadrant I
	y2080	ZAF	0.00986818	0.481718	0.198356	Quadrant I
	y2080	BWA	0.000399025	0.407576	-0.0930916	Quadrant II
	y2080	ZMB	-0.00496539	0.143487	0.162148	Quadrant IV
	y2080	SDN	0.0500516	0.508039	0.256802	Quadrant I
	y2080	ZWE	-0.0144375	0.566123	0.284241	Quadrant IV
	y2080	LSO	0.000214964	0.597664	0.284962	Quadrant I
	y2080	BDI	-0.0424632	0.228326	0.153682	Quadrant IV
	y2080	RWA	-0.0677697	0.260475	0.250015	Quadrant IV
	y2080	TZA	-0.00732483	0.117591	0.22719	Quadrant IV
	y2080	UGA	-0.0329471	0.252218	0.35662	Quadrant IV
	y2080	MOZ	-0.0302062	0.307077	0.226945	Quadrant IV
	y2080	SWZ	0.0122178	0.469235	-0.0560728	Quadrant II
	y2080	MWI	0.0411289	0.217183	0.250219	Quadrant I
	y2080	ETH	9.5904e-05	0.424355	0.158728	Quadrant I
	y2080	EGY	-7.29041e-05	0.0345086	0.108153	Quadrant IV
	y2080	KEN	-0.11725	0.435155	0.114437	Quadrant IV
	y2080	ERI	-0.0905993	0.212247	-0.0749325	Quadrant III
	y2080	SOM	-0.017442	0.229498	-0.51102	Quadrant III
	y2080	DJI	0.000147204	0.372664	0.0477028	Quadrant I
	y2080	MDG	0.0135424	0.371497	0.141834	Quadrant I
	y2080	MUS	0.000101	0.110144	-0.0151385	Quadrant II
	y2080	ATF	0.000101	0.23416	0.187859	Quadrant I
	y2080	CHN	0.0851102	0.184691	0.438978	Quadrant I
	y2080	IND	0.01089	0.0847455	0.0696693	Quadrant I
	y2080	NPL	-0.0501902	0.161426	0.0112517	Quadrant IV
	y2080	MNG	-0.00602096	0.854195	0.484718	Quadrant IV
	y2080	MMR	-0.0321139	0.0600978	0.1177	Quadrant IV
	y2080	LAO	-0.0871067	0.179103	0.32042	Quadrant IV
	y2080	THA	0.013592	0.170869	0.100783	Quadrant I
	y2080	KHM	-0.0238024	0.303092	0.293614	Quadrant IV
	y2080	VNM	-0.0530604	0.270856	0.28011	Quadrant IV
	y2080	RUS	-0.000306325	0.366166	0.379776	Quadrant IV
	y2080	PRK	-0.089163	0.0945688	-2.54633	Quadrant III
	y2080	GRL	1.33494e-06	0.303509	0.3745	Quadrant I
	y2080	ISL	3.19806e-05	0.54309	0.529121	Quadrant I
	y2080	ESP	0.0227559	0.2068	0.314284	Quadrant I
	y2080	IRL	0.00197213	0.417393	0.435246	Quadrant I
	y2080	PRT	0.0427306	0.255831	0.492668	Quadrant I
	y2080	GBR	0.00188207	0.459062	0.333442	Quadrant I
	y2080	FRA	-0.525937	0.385493	0.388846	Quadrant IV
	y2080	BEL	0.026139	0.502699	0.422247	Quadrant I
	y2080	NLD	0.011264	0.465516	0.322818	Quadrant I
	y2080	NOR	0.0175441	0.341524	0.456742	Quadrant I
	y2080	LUX	0.00264055	0.261856	0.482078	Quadrant I
	y2080	DEU	-0.0703601	0.610335	0.404441	Quadrant IV
	y2080	CHE	0.11562	0.739463	0.409456	Quadrant I
	y2080	ITA	-0.129731	0.241008	0.328348	Quadrant IV
	y2080	DNK	0.00247481	0.375162	0.495509	Quadrant I
	y2080	AUT	-0.298856	0.575309	0.446754	Quadrant IV
	y2080	SWE	0.00162485	0.419473	0.277853	Quadrant I
	y2080	CZE	-0.0467898	0.653159	0.351944	Quadrant IV
	y2080	HRV	-0.589049	0.400185	0.288023	Quadrant IV
	y2080	SVN	-0.532393	0.379527	0.295197	Quadrant IV
	y2080	SJM	9.64036e-07	0.305318	0.373145	Quadrant I
	y2080	POL	0.00248709	0.688821	0.333541	Quadrant I
	y2080	BIH	0.142858	0.218084	0.428071	Quadrant I
	y2080	HUN	-0.933084	0.825751	0.374108	Quadrant IV
	y2080	SVK	-0.314856	0.750429	0.274835	Quadrant IV
	y2080	MNE	0.145115	0.398857	0.423286	Quadrant I
	y2080	SRB	0.128899	0.515721	0.315853	Quadrant I
	y2080	ALB	0.124311	0.319256	0.42135	Quadrant I
	y2080	GRC	-0.0213067	0.154893	0.315705	Quadrant IV
	y2080	MKD	0.130363	0.305948	0.262833	Quadrant I
	y2080	ROU	-0.700172	0.414322	0.324374	Quadrant IV
	y2080	LTU	0.00250673	0.512972	0.441787	Quadrant I
	y2080	LVA	0.00265231	0.441841	0.437977	Quadrant I
	y2080	FIN	0.0018325	0.509493	0.376803	Quadrant I
	y2080	EST	0.00228085	0.446817	0.440906	Quadrant I
	y2080	BGR	-0.474841	0.601	0.257869	Quadrant IV
	y2080	BLR	-0.0014256	0.517291	0.427337	Quadrant IV
	y2080	TUR	0.0408399	0.0843975	0.141136	Quadrant I
	y2080	MDA	-0.00120166	0.49236	0.279099	Quadrant IV
	y2080	CYP	9.96721e-07	0.135471	0.136838	Quadrant I
	y2080	IRN	-0.000568419	0.0625186	-0.158456	Quadrant III
	y2080	UKR	-0.00117048	0.522099	0.38415	Quadrant IV
	y2080	GEO	-0.000951078	0.45252	0.136582	Quadrant IV
	y2080	ARM	0.00566	0.506145	0.249514	Quadrant I
	y2080	AZE	0.00933744	0.295414	0.0805595	Quadrant I
	y2080	KAZ	0.00564035	0.465928	0.268752	Quadrant I
	y2080	TKM	0.0049704	0.414127	0.327335	Quadrant I
	y2080	UZB	0.00925834	0.3585	0.252886	Quadrant I
	y2080	AFG	0.000257836	0.470118	0.0355057	Quadrant I
	y2080	TJK	0.010605	0.509798	0.0692412	Quadrant I
	y2080	KGZ	0.00791262	0.57314	0.308387	Quadrant I
	y2080	MEX	0.198241	0.452794	0.107788	Quadrant I
	y2080	USA	0.0335829	0.489197	0.355931	Quadrant I
	y2080	GTM	0.506025	0.413957	-0.189236	Quadrant II
	y2080	ECU	-0.00356181	0.647634	0.170226	Quadrant IV
	y2080	SLV	0.252916	0.41274	0.00695118	Quadrant I
	y2080	HND	0.281484	0.64499	0.0605521	Quadrant I
	y2080	BLZ	0.64673	0.291669	0.313707	Quadrant I
	y2080	NIC	0.169161	0.488617	0.000470865	Quadrant I
	y2080	CRI	0.393124	0.407175	0.0835192	Quadrant I
	y2080	CUB	0.610721	0.565455	0.0706005	Quadrant I
	y2080	PAN	0.0971581	0.315091	0.152873	Quadrant I
	y2080	PER	0.072425	0.127712	0.0969327	Quadrant I
	y2080	COL	0.0876266	0.660296	-0.00496202	Quadrant II
	y2080	BHS	0.645153	0.265088	0.31664	Quadrant I
	y2080	JAM	0.564288	0.206038	0.155788	Quadrant I
	y2080	CHL	0.0425298	0.61973	0.175347	Quadrant I
	y2080	HTI	0.497962	0.410103	0.202677	Quadrant I
	y2080	BRA	0.0643935	0.464558	0.255909	Quadrant I
	y2080	ARG	0.18205	0.852417	0.358434	Quadrant I
	y2080	VEN	0.131205	0.449205	-0.0249488	Quadrant II
	y2080	DOM	0.520256	0.328437	0.12041	Quadrant I
	y2080	BOL	0.0552588	0.858833	0.223236	Quadrant I
	y2080	PRY	0.0566182	0.587484	0.176668	Quadrant I
	y2080	TTO	0.0328522	0.294427	-0.139424	Quadrant II
	y2080	FLK	1e-06	0.315723	0.313763	Quadrant I
	y2080	GUY	0.0165919	0.154677	0.211739	Quadrant I
	y2080	URY	0.282814	0.633771	0.27024	Quadrant I
	y2080	SUR	0.000102411	0.342518	0.0669022	Quadrant I
	y2080	GUF	-2.95045e-05	0.228415	0.0943108	Quadrant IV
	y2080	SGS	1e-06	0.307318	0.297236	Quadrant I
	y2080	MAR	3.031e-05	0.127567	0.192323	Quadrant I
	y2080	TUN	-0.000322036	0.0694178	0.0632441	Quadrant IV
	y2080	SAU	-0.0637498	0.129307	-0.0908666	Quadrant III
	y2080	ISR	1.00028e-06	0.0535023	0.296487	Quadrant I
	y2080	JOR	9.99704e-07	0.263244	0.120768	Quadrant I
	y2080	LBN	1.82491e-05	0.107039	0.170309	Quadrant I
	y2080	SYR	-7.21917e-05	0.286922	0.301142	Quadrant IV
	y2080	IRQ	0.00034555	0.183687	-0.591064	Quadrant II
	y2080	YEM	-0.0263793	0.362204	-0.0701834	Quadrant III
	y2080	KWT	9.97326e-07	0.134264	0.148932	Quadrant I
	y2080	QAT	-7.1562e-06	0.295243	0.368585	Quadrant IV
	y2080	OMN	-0.174887	0.0689907	0.193276	Quadrant IV
	y2080	ARE	1.00466e-06	0.00160625	-0.201985	Quadrant II
	y2080	PAK	0.00266464	0.573349	0.0502195	Quadrant I
	y2080	CAN	-0.00166824	0.356789	0.269093	Quadrant IV
	y2080	PRI	0.619364	0.292608	0.279394	Quadrant I
	y2080	AUS	-1.09972	0.488779	0.3462	Quadrant IV
	y2080	JPN	-0.0791671	0.05959	0.0839319	Quadrant IV
	y2080	NZL	-0.0003138	0.462257	0.357168	Quadrant IV
	y2080	IDN	0.0589777	0.109641	-0.144747	Quadrant II
	y2080	MYS	0.102835	0.146716	0.0576521	Quadrant I
	y2080	SGP	0.116191	0.302483	0.320736	Quadrant I
	y2080	BRN	0.116191	0.13786	-0.0594832	Quadrant II
	y2080	PHL	0.0693332	0.353241	0.200536	Quadrant I
	y2080	TLS	-0.0028583	0.559502	0.177872	Quadrant IV
	y2080	KOR	-0.0908117	0.0829255	0.165244	Quadrant IV
	y2080	PNG	-0.0108637	0.379381	0.253788	Quadrant IV
	y2080	SLB	0.116191	0.284044	0.329381	Quadrant I
	y2080	NCL	-0.0417963	0.167786	0.208009	Quadrant IV
	y2080	VUT	0.116191	0.293735	0.36179	Quadrant I
	y2080	FJI	0.097259	0.117972	0.232268	Quadrant I
	y2080	REU	0.00308936	0.25201	0.175888	Quadrant I
	y2080	LKA	-0.0349249	0.055743	-0.093055	Quadrant III
	y2080	BGD	0.00174447	0.0966809	0.0425305	Quadrant I
	y2080	BTN	0.0259353	0.272847	0.317026	Quadrant I
	y2090	SEN	-0.0662749	0.0864667	0.167352	Quadrant IV
	y2090	GMB	-1.23975	0.142254	0.167153	Quadrant IV
	y2090	MRT	0.0587025	0.400578	0.10864	Quadrant I
	y2090	ESH	1e-06	0.211657	-0.248778	Quadrant II
	y2090	GNB	-1.23624	0.660109	0.305706	Quadrant IV
	y2090	GIN	-0.523762	0.139674	0.331972	Quadrant IV
	y2090	SLE	0.458233	0.0624035	0.385115	Quadrant I
	y2090	MLI	-0.0709973	0.299706	0.240875	Quadrant IV
	y2090	LBR	0.522652	0.257953	0.263073	Quadrant I
	y2090	CIV	-0.347898	0.212474	0.383511	Quadrant IV
	y2090	BFA	-0.126581	0.0900206	0.528596	Quadrant IV
	y2090	GHA	-0.25326	0.214884	0.369873	Quadrant IV
	y2090	TGO	-0.384719	0.13932	0.298567	Quadrant IV
	y2090	NER	-0.0330131	0.100297	0.263298	Quadrant IV
	y2090	BEN	-0.277061	0.0268297	0.258915	Quadrant IV
	y2090	DZA	0.000123218	0.153429	-0.166643	Quadrant II
	y2090	NGA	-0.0835787	0.0523013	0.218529	Quadrant IV
	y2090	CMR	0.08371	0.0862732	0.35688	Quadrant I
	y2090	GAB	0.000683198	0.248627	0.214182	Quadrant I
	y2090	GNQ	0.165753	0.287666	0.315085	Quadrant I
	y2090	NAM	0.0166735	0.334626	0.183506	Quadrant I
	y2090	AGO	0.0553799	0.296298	0.185801	Quadrant I
	y2090	COG	0.421963	0.246503	0.161885	Quadrant I
	y2090	COD	0.0250585	0.269126	0.227682	Quadrant I
	y2090	LBY	7.32578e-05	0.246039	0.328723	Quadrant I
	y2090	TCD	0.303503	0.118827	0.204221	Quadrant I
	y2090	CAF	0.399711	0.416441	0.427197	Quadrant I
	y2090	ZAF	0.0184857	0.471942	0.213905	Quadrant I
	y2090	BWA	0.00340057	0.399124	-0.074249	Quadrant II
	y2090	ZMB	-0.00020767	0.163518	0.213941	Quadrant IV
	y2090	SDN	0.0561918	0.537936	0.287617	Quadrant I
	y2090	ZWE	-0.0282674	0.614137	0.345689	Quadrant IV
	y2090	LSO	0.000512245	0.603372	0.328697	Quadrant I
	y2090	BDI	-0.0440324	0.254496	0.228405	Quadrant IV
	y2090	RWA	-0.0679493	0.273191	0.301067	Quadrant IV
	y2090	TZA	0.0126862	0.134266	0.275697	Quadrant I
	y2090	UGA	-0.0263981	0.282179	0.398045	Quadrant IV
	y2090	MOZ	-0.0503929	0.337087	0.280238	Quadrant IV
	y2090	SWZ	0.0163557	0.481166	-0.00765928	Quadrant II
	y2090	MWI	0.0136843	0.259986	0.317103	Quadrant I
	y2090	ETH	0.00128294	0.453989	0.221273	Quadrant I
	y2090	EGY	0.000529709	0.028963	0.121609	Quadrant I
	y2090	KEN	0.0228526	0.453177	0.176532	Quadrant I
	y2090	ERI	0.04366	0.201992	0.0682484	Quadrant I
	y2090	SOM	0.00394572	0.227938	-0.429966	Quadrant II
	y2090	DJI	0.0545769	0.372783	0.0828344	Quadrant I
	y2090	MDG	0.0208079	0.385319	0.215877	Quadrant I
	y2090	MUS	0.000101	0.105734	0.00580622	Quadrant I
	y2090	ATF	0.000101	0.229816	0.195883	Quadrant I
	y2090	CHN	0.133303	0.187188	0.437642	Quadrant I
	y2090	IND	0.0159011	0.0934756	0.0785584	Quadrant I
	y2090	NPL	-0.0558005	0.173269	0.0818518	Quadrant IV
	y2090	MNG	-0.0226487	0.865723	0.494808	Quadrant IV
	y2090	MMR	-0.162041	0.0787078	0.164328	Quadrant IV
	y2090	LAO	-0.0961219	0.184186	0.346724	Quadrant IV
	y2090	THA	-0.140591	0.177287	0.117157	Quadrant IV
	y2090	KHM	-0.162317	0.325245	0.326632	Quadrant IV
	y2090	VNM	-0.0552114	0.280103	0.30154	Quadrant IV
	y2090	RUS	0.00227491	0.362482	0.370475	Quadrant I
	y2090	PRK	-0.123038	0.106407	-2.77901	Quadrant III
	y2090	GRL	1.74372e-06	0.297171	0.371003	Quadrant I
	y2090	ISL	6.86255e-05	0.537936	0.530732	Quadrant I
	y2090	ESP	0.0457569	0.208163	0.315368	Quadrant I
	y2090	IRL	0.00148929	0.409014	0.429724	Quadrant I
	y2090	PRT	0.0665092	0.252477	0.49181	Quadrant I
	y2090	GBR	0.0016901	0.456253	0.330555	Quadrant I
	y2090	FRA	-0.458471	0.384138	0.387956	Quadrant IV
	y2090	BEL	0.0388086	0.494377	0.418088	Quadrant I
	y2090	NLD	0.0163763	0.45885	0.317583	Quadrant I
	y2090	NOR	0.0186302	0.336567	0.456761	Quadrant I
	y2090	LUX	0.00254255	0.260185	0.476471	Quadrant I
	y2090	DEU	-0.0666301	0.605113	0.400737	Quadrant IV
	y2090	CHE	0.130332	0.736417	0.409134	Quadrant I
	y2090	ITA	-0.171547	0.237438	0.325397	Quadrant IV
	y2090	DNK	0.00237665	0.369981	0.493144	Quadrant I
	y2090	AUT	-0.277161	0.567667	0.442248	Quadrant IV
	y2090	SWE	0.00127571	0.416452	0.274315	Quadrant I
	y2090	CZE	-0.0416761	0.650054	0.34721	Quadrant IV
	y2090	HRV	-0.552943	0.396741	0.284347	Quadrant IV
	y2090	SVN	-0.561586	0.374911	0.291417	Quadrant IV
	y2090	SJM	1.02035e-06	0.29961	0.371234	Quadrant I
	y2090	POL	0.00238137	0.687041	0.330812	Quadrant I
	y2090	BIH	0.16286	0.218191	0.433418	Quadrant I
	y2090	HUN	-0.856926	0.819232	0.371547	Quadrant IV
	y2090	SVK	-0.283279	0.737772	0.264751	Quadrant IV
	y2090	MNE	0.165235	0.404677	0.425825	Quadrant I
	y2090	SRB	0.149358	0.519219	0.322209	Quadrant I
	y2090	ALB	0.142647	0.321675	0.426407	Quadrant I
	y2090	GRC	-0.0340688	0.15468	0.314423	Quadrant IV
	y2090	MKD	0.149721	0.304955	0.263817	Quadrant I
	y2090	ROU	-0.674004	0.415396	0.326547	Quadrant IV
	y2090	LTU	0.00240863	0.513868	0.439264	Quadrant I
	y2090	LVA	0.00254066	0.439228	0.437131	Quadrant I
	y2090	FIN	0.00136185	0.513813	0.375267	Quadrant I
	y2090	EST	0.00195267	0.446074	0.439546	Quadrant I
	y2090	BGR	-0.46614	0.595021	0.254888	Quadrant IV
	y2090	BLR	0.000251254	0.511671	0.417657	Quadrant I
	y2090	TUR	0.0464904	0.0848987	0.140793	Quadrant I
	y2090	MDA	-0.0014567	0.493773	0.274696	Quadrant IV
	y2090	CYP	9.96815e-07	0.136269	0.135623	Quadrant I
	y2090	IRN	-0.000135124	0.0595218	-0.140658	Quadrant III
	y2090	UKR	-0.00137383	0.522028	0.377884	Quadrant IV
	y2090	GEO	0.000556838	0.449664	0.129203	Quadrant I
	y2090	ARM	0.0273747	0.506672	0.243603	Quadrant I
	y2090	AZE	0.0513431	0.291235	0.092846	Quadrant I
	y2090	KAZ	0.0194676	0.45945	0.254292	Quadrant I
	y2090	TKM	0.029328	0.39686	0.305211	Quadrant I
	y2090	UZB	0.0553085	0.355451	0.245329	Quadrant I
	y2090	AFG	-0.00113175	0.481702	0.121571	Quadrant IV
	y2090	TJK	0.0552214	0.518695	0.0724396	Quadrant I
	y2090	KGZ	0.0439515	0.581034	0.308587	Quadrant I
	y2090	MEX	0.201609	0.455447	0.13837	Quadrant I
	y2090	USA	0.0311763	0.483757	0.348441	Quadrant I
	y2090	GTM	0.507687	0.432058	-0.128702	Quadrant II
	y2090	ECU	0.00280764	0.643366	0.20925	Quadrant I
	y2090	SLV	0.250839	0.422537	0.0595295	Quadrant I
	y2090	HND	0.293515	0.664745	0.115523	Quadrant I
	y2090	BLZ	0.640472	0.29936	0.344562	Quadrant I
	y2090	NIC	0.209575	0.502841	0.0566241	Quadrant I
	y2090	CRI	0.397356	0.408681	0.116359	Quadrant I
	y2090	CUB	0.605943	0.581133	0.106187	Quadrant I
	y2090	PAN	0.112036	0.307522	0.171992	Quadrant I
	y2090	PER	0.0748449	0.130091	0.122203	Quadrant I
	y2090	COL	0.0923468	0.659606	0.0290156	Quadrant I
	y2090	BHS	0.638869	0.262291	0.33446	Quadrant I
	y2090	JAM	0.554616	0.216929	0.193341	Quadrant I
	y2090	CHL	0.04994	0.617741	0.196912	Quadrant I
	y2090	HTI	0.500915	0.434192	0.251618	Quadrant I
	y2090	BRA	0.0964335	0.466909	0.28309	Quadrant I
	y2090	ARG	0.243128	0.83767	0.384008	Quadrant I
	y2090	VEN	0.00307604	0.450934	0.00558102	Quadrant I
	y2090	DOM	0.519726	0.32613	0.139207	Quadrant I
	y2090	BOL	0.0721064	0.863874	0.256796	Quadrant I
	y2090	PRY	0.0638636	0.595466	0.204541	Quadrant I
	y2090	TTO	0.00040794	0.292118	-0.119375	Quadrant II
	y2090	FLK	1e-06	0.309875	0.327865	Quadrant I
	y2090	GUY	0.00472159	0.164246	0.244312	Quadrant I
	y2090	URY	0.329377	0.62436	0.29831	Quadrant I
	y2090	SUR	0.000100448	0.341349	0.0909364	Quadrant I
	y2090	GUF	-3.61327e-05	0.222134	0.102846	Quadrant IV
	y2090	SGS	1e-06	0.301636	0.31164	Quadrant I
	y2090	MAR	6.58958e-05	0.123349	0.204359	Quadrant I
	y2090	TUN	-0.000457715	0.0673075	0.0696505	Quadrant IV
	y2090	SAU	-0.00550893	0.123907	-0.0953236	Quadrant III
	y2090	ISR	1.00043e-06	0.0515091	0.299178	Quadrant I
	y2090	JOR	9.98712e-07	0.266103	0.136504	Quadrant I
	y2090	LBN	1.83432e-05	0.104078	0.173758	Quadrant I
	y2090	SYR	-5.49137e-05	0.289518	0.314403	Quadrant IV
	y2090	IRQ	0.000469006	0.180444	-0.484129	Quadrant II
	y2090	YEM	-0.00296827	0.363434	-0.00238916	Quadrant III
	y2090	KWT	1.00041e-06	0.129776	0.143213	Quadrant I
	y2090	QAT	-7.98643e-06	0.291159	0.361588	Quadrant IV
	y2090	OMN	-0.0157346	0.0638257	0.187081	Quadrant IV
	y2090	ARE	1.00515e-06	0.00678445	-0.216104	Quadrant II
	y2090	PAK	-0.0134727	0.595463	0.096512	Quadrant IV
	y2090	CAN	-0.000156736	0.350865	0.277847	Quadrant IV
	y2090	PRI	0.611974	0.289988	0.297917	Quadrant I
	y2090	AUS	-1.11264	0.479869	0.356258	Quadrant IV
	y2090	JPN	-0.0489855	0.0604815	0.0971779	Quadrant IV
	y2090	NZL	0.00395513	0.454303	0.366432	Quadrant I
	y2090	IDN	0.0580768	0.108324	-0.114507	Quadrant II
	y2090	MYS	0.100352	0.148085	0.0683474	Quadrant I
	y2090	SGP	0.11327	0.296895	0.32184	Quadrant I
	y2090	BRN	0.11327	0.134833	-0.0609756	Quadrant II
	y2090	PHL	0.0195149	0.369215	0.230047	Quadrant I
	y2090	TLS	-0.00284698	0.583605	0.215695	Quadrant IV
	y2090	KOR	-0.125023	0.0809292	0.168772	Quadrant IV
	y2090	PNG	-0.00928412	0.393661	0.283808	Quadrant IV
	y2090	SLB	0.11327	0.299068	0.361312	Quadrant I
	y2090	NCL	-0.122592	0.161888	0.210217	Quadrant IV
	y2090	VUT	0.11327	0.310992	0.383502	Quadrant I
	y2090	FJI	0.0949472	0.126686	0.259723	Quadrant I
	y2090	REU	0.00694179	0.246291	0.178479	Quadrant I
	y2090	LKA	-0.0334085	0.0609399	-0.0586015	Quadrant III
	y2090	BGD	-0.012694	0.0935392	0.0949332	Quadrant IV
	y2090	BTN	0.0133774	0.271819	0.327554	Quadrant I
	y2100	SEN	-0.0903264	0.0929371	0.209932	Quadrant IV
	y2100	GMB	-1.45525	0.151147	0.206666	Quadrant IV
	y2100	MRT	0.0902788	0.403129	0.151956	Quadrant I
	y2100	ESH	1e-06	0.209155	-0.236118	Quadrant II
	y2100	GNB	-1.4514	0.679656	0.33708	Quadrant IV
	y2100	GIN	-0.556512	0.139371	0.355859	Quadrant IV
	y2100	SLE	0.454659	0.0746489	0.41774	Quadrant I
	y2100	MLI	-0.02447	0.303854	0.289683	Quadrant IV
	y2100	LBR	0.518219	0.277403	0.302367	Quadrant I
	y2100	CIV	-0.350379	0.209966	0.402236	Quadrant IV
	y2100	BFA	-0.0856608	0.0920488	0.552228	Quadrant IV
	y2100	GHA	-0.255708	0.216344	0.393609	Quadrant IV
	y2100	TGO	-0.387445	0.15645	0.34037	Quadrant IV
	y2100	NER	-0.0787901	0.126297	0.320316	Quadrant IV
	y2100	BEN	-0.28388	0.0341051	0.300967	Quadrant IV
	y2100	DZA	0.00290156	0.15175	-0.125642	Quadrant II
	y2100	NGA	-0.132032	0.0554585	0.251791	Quadrant IV
	y2100	CMR	0.107296	0.0932014	0.383185	Quadrant I
	y2100	GAB	0.000712109	0.246479	0.231411	Quadrant I
	y2100	GNQ	0.187274	0.285752	0.329219	Quadrant I
	y2100	NAM	0.0833293	0.322986	0.212457	Quadrant I
	y2100	AGO	0.105163	0.31704	0.234618	Quadrant I
	y2100	COG	0.448829	0.245978	0.190845	Quadrant I
	y2100	COD	0.0809369	0.285271	0.274002	Quadrant I
	y2100	LBY	0.00031131	0.243209	0.342054	Quadrant I
	y2100	TCD	0.29124	0.138705	0.257896	Quadrant I
	y2100	CAF	0.351864	0.422608	0.467702	Quadrant I
	y2100	ZAF	0.0206632	0.461908	0.230665	Quadrant I
	y2100	BWA	0.00371396	0.388498	-0.0491688	Quadrant II
	y2100	ZMB	0.0102998	0.173758	0.255941	Quadrant I
	y2100	SDN	0.0569899	0.554611	0.323715	Quadrant I
	y2100	ZWE	-0.0312377	0.641355	0.389725	Quadrant IV
	y2100	LSO	0.000502198	0.599333	0.363703	Quadrant I
	y2100	BDI	-0.0250449	0.272074	0.278175	Quadrant IV
	y2100	RWA	-0.0378345	0.27996	0.340639	Quadrant IV
	y2100	TZA	0.00892139	0.144794	0.31508	Quadrant I
	y2100	UGA	-0.0149995	0.301344	0.428603	Quadrant IV
	y2100	MOZ	-0.0509753	0.358254	0.317244	Quadrant IV
	y2100	SWZ	0.0176442	0.485621	0.0396579	Quadrant I
	y2100	MWI	0.035638	0.290798	0.36309	Quadrant I
	y2100	ETH	0.000968122	0.470886	0.269682	Quadrant I
	y2100	EGY	0.00334544	0.0275616	0.138612	Quadrant I
	y2100	KEN	0.0139532	0.463618	0.224435	Quadrant I
	y2100	ERI	0.0437648	0.212424	0.166529	Quadrant I
	y2100	SOM	0.00260427	0.220463	-0.300383	Quadrant II
	y2100	DJI	0.0537759	0.367828	0.123249	Quadrant I
	y2100	MDG	0.014716	0.392467	0.268713	Quadrant I
	y2100	MUS	0.000101	0.101697	0.0259617	Quadrant I
	y2100	ATF	0.000101	0.225503	0.198706	Quadrant I
	y2100	CHN	0.0842998	0.189322	0.452318	Quadrant I
	y2100	IND	0.0159745	0.100275	0.0705295	Quadrant I
	y2100	NPL	-0.0413041	0.182393	0.131598	Quadrant IV
	y2100	MNG	-0.0166723	0.874062	0.505184	Quadrant IV
	y2100	MMR	-0.0674306	0.0952225	0.197952	Quadrant IV
	y2100	LAO	-0.0810177	0.186312	0.367846	Quadrant IV
	y2100	THA	-0.0546235	0.18151	0.125341	Quadrant IV
	y2100	KHM	-0.067979	0.340503	0.348651	Quadrant IV
	y2100	VNM	-0.0455109	0.288055	0.315131	Quadrant IV
	y2100	RUS	2.83922e-05	0.358678	0.446838	Quadrant I
	y2100	PRK	-0.00474525	0.11768	-3.0974	Quadrant III
	y2100	GRL	1.83295e-06	0.290876	0.380213	Quadrant I
	y2100	ISL	7.18274e-05	0.532086	0.54269	Quadrant I
	y2100	ESP	0.0489967	0.208906	0.340736	Quadrant I
	y2100	IRL	0.00098885	0.400902	0.448773	Quadrant I
	y2100	PRT	0.0667446	0.24809	0.510984	Quadrant I
	y2100	GBR	0.000903515	0.452772	0.354889	Quadrant I
	y2100	FRA	-0.395319	0.382313	0.410412	Quadrant IV
	y2100	BEL	0.038529	0.485668	0.439575	Quadrant I
	y2100	NLD	0.0162721	0.451808	0.340921	Quadrant I
	y2100	NOR	0.0175007	0.331096	0.468773	Quadrant I
	y2100	LUX	0.00306257	0.254484	0.49202	Quadrant I
	y2100	DEU	-0.0575362	0.599226	0.421995	Quadrant IV
	y2100	CHE	0.126864	0.73274	0.417566	Quadrant I
	y2100	ITA	-0.164095	0.233295	0.350891	Quadrant IV
	y2100	DNK	0.000333373	0.363982	0.510788	Quadrant I
	y2100	AUT	-0.235813	0.559174	0.4623	Quadrant IV
	y2100	SWE	0.000977884	0.412922	0.30183	Quadrant I
	y2100	CZE	-0.036689	0.645504	0.369776	Quadrant IV
	y2100	HRV	-0.47731	0.392427	0.312437	Quadrant IV
	y2100	SVN	-0.487407	0.369998	0.319348	Quadrant IV
	y2100	SJM	1.01776e-06	0.29395	0.38255	Quadrant I
	y2100	POL	0.000696517	0.684096	0.35618	Quadrant I
	y2100	BIH	0.16026	0.216955	0.449285	Quadrant I
	y2100	HUN	-0.767797	0.807774	0.395049	Quadrant IV
	y2100	SVK	-0.24399	0.72311	0.292745	Quadrant IV
	y2100	MNE	0.162674	0.408921	0.433313	Quadrant I
	y2100	SRB	0.146744	0.521368	0.340381	Quadrant I
	y2100	ALB	0.139636	0.322202	0.439827	Quadrant I
	y2100	GRC	-0.034034	0.153625	0.341233	Quadrant IV
	y2100	MKD	0.147094	0.302165	0.275075	Quadrant I
	y2100	ROU	-0.603018	0.415112	0.355312	Quadrant IV
	y2100	LTU	0.000861013	0.513151	0.460142	Quadrant I
	y2100	LVA	0.00352874	0.435367	0.458896	Quadrant I
	y2100	FIN	0.000912016	0.517625	0.397774	Quadrant I
	y2100	EST	0.00214519	0.444659	0.460225	Quadrant I
	y2100	BGR	-0.413734	0.587106	0.282686	Quadrant IV
	y2100	BLR	0.000187446	0.504761	0.487551	Quadrant I
	y2100	TUR	0.0443192	0.0848222	0.148192	Quadrant I
	y2100	MDA	-0.00143705	0.493145	0.365395	Quadrant IV
	y2100	CYP	0.00391332	0.13597	0.170765	Quadrant I
	y2100	IRN	2.18217e-06	0.0571295	-0.113195	Quadrant II
	y2100	UKR	-0.00135657	0.519422	0.454876	Quadrant IV
	y2100	GEO	0.000492567	0.445067	0.240248	Quadrant I
	y2100	ARM	-0.00888332	0.505418	0.341353	Quadrant IV
	y2100	AZE	-0.0206429	0.287606	0.220276	Quadrant IV
	y2100	KAZ	-0.00292	0.453246	0.343154	Quadrant IV
	y2100	TKM	0.00248193	0.378964	0.387913	Quadrant I
	y2100	UZB	-0.0185406	0.349497	0.344055	Quadrant IV
	y2100	AFG	-7.23607e-05	0.509713	0.182067	Quadrant IV
	y2100	TJK	-0.0193069	0.520774	0.20155	Quadrant IV
	y2100	KGZ	-0.0180485	0.583601	0.399575	Quadrant IV
	y2100	MEX	0.204697	0.455762	0.148326	Quadrant I
	y2100	USA	0.0258884	0.478377	0.356564	Quadrant I
	y2100	GTM	0.508737	0.44492	-0.0991992	Quadrant II
	y2100	ECU	0.034401	0.634956	0.216217	Quadrant I
	y2100	SLV	0.253904	0.427212	0.0760972	Quadrant I
	y2100	HND	0.301982	0.676482	0.130334	Quadrant I
	y2100	BLZ	0.634989	0.302433	0.356221	Quadrant I
	y2100	NIC	0.229549	0.509824	0.073497	Quadrant I
	y2100	CRI	0.396369	0.408137	0.124449	Quadrant I
	y2100	CUB	0.601679	0.591398	0.124594	Quadrant I
	y2100	PAN	0.117603	0.299122	0.177846	Quadrant I
	y2100	PER	0.082287	0.131072	0.143718	Quadrant I
	y2100	COL	0.0968138	0.655903	0.0381578	Quadrant I
	y2100	BHS	0.633362	0.258113	0.33946	Quadrant I
	y2100	JAM	0.544166	0.22444	0.213833	Quadrant I
	y2100	CHL	0.0582427	0.613437	0.20327	Quadrant I
	y2100	HTI	0.505401	0.446208	0.278882	Quadrant I
	y2100	BRA	0.121793	0.466804	0.288341	Quadrant I
	y2100	ARG	0.241128	0.820618	0.378968	Quadrant I
	y2100	VEN	-0.174608	0.450685	0.0246915	Quadrant IV
	y2100	DOM	0.519668	0.322621	0.154048	Quadrant I
	y2100	BOL	0.0731648	0.859864	0.261812	Quadrant I
	y2100	PRY	0.0526391	0.598205	0.218853	Quadrant I
	y2100	TTO	-0.0398399	0.289036	-0.106676	Quadrant III
	y2100	FLK	0.142858	0.304074	0.331702	Quadrant I
	y2100	GUY	-0.0228483	0.172492	0.263624	Quadrant IV
	y2100	URY	0.32335	0.612848	0.294891	Quadrant I
	y2100	SUR	0.00281065	0.339034	0.113957	Quadrant I
	y2100	GUF	0.0025134	0.216803	0.10336	Quadrant I
	y2100	SGS	1e-06	0.296002	0.315693	Quadrant I
	y2100	MAR	3.64005e-05	0.120219	0.223844	Quadrant I
	y2100	TUN	0.00182319	0.0647464	0.0927883	Quadrant I
	y2100	SAU	0.000395654	0.118549	-0.0898493	Quadrant II
	y2100	ISR	1.00061e-06	0.0492879	0.309686	Quadrant I
	y2100	JOR	9.99646e-07	0.266916	0.158545	Quadrant I
	y2100	LBN	1.88087e-05	0.0998078	0.191359	Quadrant I
	y2100	SYR	-5.77208e-05	0.289901	0.334472	Quadrant IV
	y2100	IRQ	0.00035027	0.178708	-0.415534	Quadrant II
	y2100	YEM	-0.00100041	0.372273	0.0591199	Quadrant IV
	y2100	KWT	9.96794e-07	0.125379	0.145053	Quadrant I
	y2100	QAT	3.53675e-06	0.286703	0.361617	Quadrant I
	y2100	OMN	1.01097e-06	0.0581108	0.190649	Quadrant I
	y2100	ARE	1.00736e-06	0.0101414	-0.220211	Quadrant II
	y2100	PAK	-0.00475453	0.60982	0.130622	Quadrant IV
	y2100	CAN	-0.000734983	0.344523	0.298136	Quadrant IV
	y2100	PRI	0.604703	0.287068	0.30614	Quadrant I
	y2100	AUS	-0.998253	0.470545	0.37391	Quadrant IV
	y2100	JPN	-0.0410277	0.0612725	0.134344	Quadrant IV
	y2100	NZL	0.0038173	0.444918	0.384935	Quadrant I
	y2100	IDN	0.0666931	0.106532	-0.0911763	Quadrant II
	y2100	MYS	0.113186	0.148886	0.0718046	Quadrant I
	y2100	SGP	0.127769	0.291328	0.320624	Quadrant I
	y2100	BRN	0.127769	0.13142	-0.0635885	Quadrant II
	y2100	PHL	0.0572176	0.380675	0.251481	Quadrant I
	y2100	TLS	-0.00376809	0.601067	0.244711	Quadrant IV
	y2100	KOR	-0.00439717	0.0781858	0.170524	Quadrant IV
	y2100	PNG	0.00257169	0.401458	0.303915	Quadrant I
	y2100	SLB	0.127769	0.308196	0.382622	Quadrant I
	y2100	NCL	-0.0393953	0.15626	0.21273	Quadrant IV
	y2100	VUT	0.127769	0.323159	0.398032	Quadrant I
	y2100	FJI	0.107865	0.132167	0.281142	Quadrant I
	y2100	REU	0.00637092	0.240938	0.182631	Quadrant I
	y2100	LKA	-0.0292034	0.0647502	-0.0383087	Quadrant III
	y2100	BGD	-0.00484935	0.090729	0.131489	Quadrant IV
	y2100	BTN	0.0617636	0.269409	0.33273	Quadrant I

## Sheet: MED
	MED
	Year	Region	Water	AHEI	Cost	Quadrant-type
	y2030	SEN	0.0149	0.0103777	-0.502504	Quadrant II
	y2030	GMB	8.08e-06	0.076756	-0.600669	Quadrant II
	y2030	MRT	-0.0594	0.162249	-0.317841	Quadrant III
	y2030	ESH	-0.0303	0.111926	-0.159579	Quadrant III
	y2030	GNB	8.09e-06	0.216337	-0.550331	Quadrant II
	y2030	GIN	-0.00189	0.0187153	-0.294655	Quadrant III
	y2030	SLE	-0.00595	0.0127064	-0.452381	Quadrant III
	y2030	MLI	0.00548	0.190977	-0.346369	Quadrant II
	y2030	LBR	-0.00617	0.162565	-0.983703	Quadrant III
	y2030	CIV	-0.00567	0.0881348	0.0238914	Quadrant IV
	y2030	BFA	-3.87e-06	0.12882	0.053861	Quadrant IV
	y2030	GHA	-0.00532	0.0897256	-0.050118	Quadrant III
	y2030	TGO	-0.00415	0.0354493	-0.548388	Quadrant III
	y2030	NER	0.0586	0.0567018	-0.368976	Quadrant II
	y2030	BEN	-0.0453	0.0116221	-0.29877	Quadrant III
	y2030	DZA	-0.00282	0.0609761	-0.393292	Quadrant III
	y2030	NGA	0.00198	0.0510421	-0.356187	Quadrant II
	y2030	CMR	-0.00195	0.0302067	-0.115125	Quadrant III
	y2030	GAB	-0.000255	0.104236	0.108155	Quadrant IV
	y2030	GNQ	-0.00157	0.106549	0.205802	Quadrant IV
	y2030	NAM	0.00171	0.0792927	-0.150571	Quadrant II
	y2030	AGO	0.0199	0.155577	-0.486392	Quadrant II
	y2030	COG	-0.000648	0.100299	-0.774131	Quadrant III
	y2030	COD	0.00128	0.163697	-1.29384	Quadrant II
	y2030	LBY	-0.00768	0.0922016	0.360108	Quadrant IV
	y2030	TCD	-0.000513	0.106063	-1.228	Quadrant III
	y2030	CAF	0.000996	0.154635	-0.328854	Quadrant II
	y2030	ZAF	0.0335	0.215529	0.086467	Quadrant I
	y2030	BWA	-0.0204	0.148888	-0.189575	Quadrant III
	y2030	ZMB	-0.0315	0.0329002	-1.05525	Quadrant III
	y2030	SDN	0.015	0.131482	-0.103108	Quadrant II
	y2030	ZWE	-0.00531	0.220816	-0.546903	Quadrant III
	y2030	LSO	-0.000831	0.219538	-0.683662	Quadrant III
	y2030	BDI	0.0486	0.161365	-1.59695	Quadrant II
	y2030	RWA	0.114	0.157593	-0.300218	Quadrant II
	y2030	TZA	0.0117	0.0416739	-0.383236	Quadrant II
	y2030	UGA	0.106	0.113616	-0.245025	Quadrant II
	y2030	MOZ	-0.0118	0.137952	-0.673047	Quadrant III
	y2030	SWZ	0.00949	0.214174	-0.380143	Quadrant II
	y2030	MWI	0.185	0.123819	-0.863655	Quadrant II
	y2030	ETH	-0.00126	0.163223	-0.767208	Quadrant III
	y2030	EGY	-0.0123	0.0322532	-0.0209709	Quadrant III
	y2030	KEN	0.013	0.132418	-0.461906	Quadrant II
	y2030	ERI	-0.00766	0.130765	-0.433178	Quadrant III
	y2030	SOM	0.0369	0.108903	-0.0920327	Quadrant II
	y2030	DJI	-0.0806	0.127839	-0.177981	Quadrant III
	y2030	MDG	-0.00504	0.225312	-0.84839	Quadrant III
	y2030	MUS	0.000101	0.0591377	-0.00722386	Quadrant II
	y2030	ATF	0.000101	0.0877961	0.313013	Quadrant I
	y2030	CHN	0.0547	0.050688	0.155624	Quadrant I
	y2030	IND	-0.0296	0.0441899	-0.272201	Quadrant III
	y2030	NPL	-0.231	0.0722944	-0.448433	Quadrant III
	y2030	MNG	-0.000709	0.190662	0.45942	Quadrant IV
	y2030	MMR	-0.0977	0.000784444	-0.0309292	Quadrant III
	y2030	LAO	-0.303	0.068996	0.130305	Quadrant IV
	y2030	THA	0.041	0.0630327	0.0882094	Quadrant I
	y2030	KHM	-0.0595	0.101062	-0.000245574	Quadrant III
	y2030	VNM	-0.277	0.0717839	0.248412	Quadrant IV
	y2030	RUS	-0.00105	0.120808	0.165653	Quadrant IV
	y2030	PRK	0.0214	0.0329033	-0.936247	Quadrant II
	y2030	GRL	7.66e-06	0.115445	0.298897	Quadrant I
	y2030	ISL	0.000577	0.191809	0.440592	Quadrant I
	y2030	ESP	-0.0155	0.0777301	0.0624989	Quadrant IV
	y2030	IRL	-0.000383	0.163385	0.255879	Quadrant IV
	y2030	PRT	1e-06	0.0902147	0.294158	Quadrant I
	y2030	GBR	0.000502	0.164229	0.0743094	Quadrant I
	y2030	FRA	-0.64	0.131084	0.14316	Quadrant IV
	y2030	BEL	0.000803	0.182303	0.199053	Quadrant I
	y2030	NLD	0.000715	0.175672	0.0753056	Quadrant I
	y2030	NOR	0.000559	0.130254	0.365228	Quadrant I
	y2030	LUX	0.001	0.0534539	0.313416	Quadrant I
	y2030	DEU	-0.0823	0.230016	0.178949	Quadrant IV
	y2030	CHE	0.00032	0.280131	0.298589	Quadrant I
	y2030	ITA	-0.0586	0.0934057	0.0665864	Quadrant IV
	y2030	DNK	0.001	0.129983	0.302949	Quadrant I
	y2030	AUT	-0.366	0.207192	0.246261	Quadrant IV
	y2030	SWE	-0.000156	0.151022	-0.00366087	Quadrant III
	y2030	CZE	-0.0595	0.224417	0.0930977	Quadrant IV
	y2030	HRV	-0.869	0.145855	-0.00172109	Quadrant III
	y2030	SVN	-0.915	0.141563	0.0215651	Quadrant IV
	y2030	SJM	9.37e-07	0.115045	0.294345	Quadrant I
	y2030	POL	0.000981	0.234443	0.0652316	Quadrant I
	y2030	BIH	0.000162	0.0671654	0.217967	Quadrant I
	y2030	HUN	-0.944	0.236578	0.127174	Quadrant IV
	y2030	SVK	-0.375	0.266252	-0.00424924	Quadrant III
	y2030	MNE	0.000157	0.0920771	0.254546	Quadrant I
	y2030	SRB	0.000158	0.180482	0.158735	Quadrant I
	y2030	ALB	0.000125	0.0814869	0.239604	Quadrant I
	y2030	GRC	1e-06	0.0296709	0.018768	Quadrant I
	y2030	MKD	0.000136	0.0899401	0.0139583	Quadrant I
	y2030	ROU	-0.692	0.121899	0.0245753	Quadrant IV
	y2030	LTU	0.001	0.174017	0.214144	Quadrant I
	y2030	LVA	0.000966	0.137264	0.203095	Quadrant I
	y2030	FIN	-0.000439	0.154273	0.117703	Quadrant IV
	y2030	EST	0.000272	0.14548	0.201659	Quadrant I
	y2030	BGR	-0.478	0.205593	-0.075211	Quadrant III
	y2030	BLR	-0.00544	0.164904	0.219884	Quadrant IV
	y2030	TUR	2.35e-05	0.0205282	-0.0956478	Quadrant II
	y2030	MDA	-0.00753	0.167637	-0.0200397	Quadrant III
	y2030	CYP	1.01e-06	0.0257712	-0.206425	Quadrant II
	y2030	IRN	-3.9e-07	0.0408031	-0.23993	Quadrant III
	y2030	UKR	-0.00742	0.152337	0.0693345	Quadrant IV
	y2030	GEO	-0.00383	0.161394	-0.225495	Quadrant III
	y2030	ARM	0.00108	0.15243	-0.0160861	Quadrant II
	y2030	AZE	0.0017	0.125555	-0.312439	Quadrant II
	y2030	KAZ	0.000814	0.147977	0.0954108	Quadrant I
	y2030	TKM	0.00103	0.152709	0.139382	Quadrant I
	y2030	UZB	0.00184	0.129794	-0.106271	Quadrant II
	y2030	AFG	0.0156	0.245784	-1.22398	Quadrant II
	y2030	TJK	0.00259	0.144485	-0.937419	Quadrant II
	y2030	KGZ	0.0016	0.145728	-0.225909	Quadrant II
	y2030	MEX	0.122	0.14975	-0.106378	Quadrant II
	y2030	USA	-0.00159	0.185446	0.116915	Quadrant IV
	y2030	GTM	0.0921	0.118028	-0.751479	Quadrant II
	y2030	ECU	0.0038	0.230506	-0.152483	Quadrant II
	y2030	SLV	0.373	0.125986	-0.465297	Quadrant II
	y2030	HND	0.12	0.177749	-0.568379	Quadrant II
	y2030	BLZ	-0.0377	0.0788407	0.0150208	Quadrant IV
	y2030	NIC	0.0949	0.143405	-0.667883	Quadrant II
	y2030	CRI	-0.00231	0.13809	-0.0991484	Quadrant III
	y2030	CUB	0.0465	0.170782	-0.163727	Quadrant II
	y2030	PAN	0.0014	0.131842	-0.000496942	Quadrant II
	y2030	PER	0.00919	0.0342229	-0.18284	Quadrant II
	y2030	COL	0.00509	0.242959	-0.240083	Quadrant II
	y2030	BHS	-0.0471	0.0935935	0.237849	Quadrant IV
	y2030	JAM	-0.0033	0.0573671	-0.139735	Quadrant III
	y2030	CHL	0.0204	0.199394	0.0249355	Quadrant I
	y2030	HTI	0.171	0.10595	-0.805435	Quadrant II
	y2030	BRA	-0.00819	0.15857	0.111558	Quadrant IV
	y2030	ARG	0.0148	0.292811	0.20148	Quadrant I
	y2030	VEN	0.00513	0.171912	-0.359766	Quadrant II
	y2030	DOM	0.0877	0.136212	-0.00350737	Quadrant II
	y2030	BOL	0.00452	0.267294	-0.180203	Quadrant II
	y2030	PRY	0.00579	0.176409	-0.0516566	Quadrant II
	y2030	TTO	1.41e-05	0.105633	-0.238739	Quadrant II
	y2030	FLK	1e-06	0.121647	0.291321	Quadrant I
	y2030	GUY	0.00635	0.0353314	0.0964205	Quadrant I
	y2030	URY	0.000649	0.213652	0.115702	Quadrant I
	y2030	SUR	1.53e-05	0.11825	-0.294221	Quadrant II
	y2030	GUF	3.59e-05	0.103088	0.129576	Quadrant I
	y2030	SGS	1e-06	0.121356	0.268391	Quadrant I
	y2030	MAR	1.52e-05	0.0870534	-0.055032	Quadrant II
	y2030	TUN	-0.0904	0.0399048	-0.132956	Quadrant III
	y2030	SAU	-0.000244	0.0790066	0.0574376	Quadrant IV
	y2030	ISR	1e-06	0.00756799	0.316648	Quadrant I
	y2030	JOR	1e-06	0.0680707	-0.108641	Quadrant II
	y2030	LBN	1e-06	0.0103339	-0.0331007	Quadrant II
	y2030	SYR	1e-06	0.0963385	0.0164869	Quadrant I
	y2030	IRQ	4.58e-05	0.0920185	-0.695949	Quadrant II
	y2030	YEM	-0.000153	0.196677	-1.90269	Quadrant III
	y2030	KWT	1e-06	0.0444838	0.255312	Quadrant I
	y2030	QAT	-3.66e-06	0.101442	0.454772	Quadrant IV
	y2030	OMN	-0.000746	0.0492107	0.233335	Quadrant IV
	y2030	ARE	1e-06	0.0144619	0.0247101	Quadrant I
	y2030	PAK	0.0159	0.180971	-0.306822	Quadrant II
	y2030	CAN	0.00183	0.136615	0.0837059	Quadrant I
	y2030	PRI	-0.00623	0.109992	0.217399	Quadrant IV
	y2030	AUS	0.00142	0.185174	0.171746	Quadrant I
	y2030	JPN	-0.00334	0.0095083	0.028385	Quadrant IV
	y2030	NZL	0.000356	0.158632	0.183087	Quadrant I
	y2030	IDN	-0.00289	0.0638619	-0.242074	Quadrant III
	y2030	MYS	0.00637	0.0369957	0.158771	Quadrant I
	y2030	SGP	0.00747	0.112273	0.421651	Quadrant I
	y2030	BRN	0.00747	0.0521533	0.133499	Quadrant I
	y2030	PHL	0.00913	0.153145	0.125236	Quadrant I
	y2030	TLS	0.00522	0.19717	-0.679182	Quadrant II
	y2030	KOR	-0.0281	0.038767	0.269122	Quadrant IV
	y2030	PNG	-0.136	0.135599	-0.323697	Quadrant III
	y2030	SLB	0.00747	0.0837107	-0.16777	Quadrant II
	y2030	NCL	-0.356	0.0584539	0.330999	Quadrant IV
	y2030	VUT	0.00747	0.0606623	0.0514367	Quadrant I
	y2030	FJI	0.00527	0.0182372	0.156854	Quadrant I
	y2030	REU	-0.000909	0.1088	0.309723	Quadrant IV
	y2030	LKA	-0.251	0.0090635	-0.331632	Quadrant III
	y2030	BGD	-0.239	0.065816	-0.324651	Quadrant III
	y2030	BTN	-0.0647	0.0819265	0.259066	Quadrant IV
	y2040	SEN	0.0366	0.0335596	-0.295258	Quadrant II
	y2040	GMB	-0.000141	0.118542	-0.340092	Quadrant III
	y2040	MRT	-0.0226	0.287994	-0.102155	Quadrant III
	y2040	ESH	1e-06	0.191418	-0.339578	Quadrant II
	y2040	GNB	-0.000141	0.338356	-0.204716	Quadrant III
	y2040	GIN	-0.000281	0.0511637	0.104296	Quadrant IV
	y2040	SLE	-0.000543	0.000864909	-0.232344	Quadrant III
	y2040	MLI	0.0195	0.33037	-0.132063	Quadrant II
	y2040	LBR	-0.00115	0.21499	-0.571922	Quadrant III
	y2040	CIV	-0.000574	0.141159	0.20332	Quadrant IV
	y2040	BFA	0.0212	0.16003	0.200053	Quadrant I
	y2040	GHA	-0.000506	0.161945	0.0771401	Quadrant IV
	y2040	TGO	-0.000522	0.041587	-0.340625	Quadrant III
	y2040	NER	0.0906	0.0861925	-0.207048	Quadrant II
	y2040	BEN	0.0689	0.0140099	-0.215748	Quadrant II
	y2040	DZA	0.000121	0.121335	-0.54718	Quadrant II
	y2040	NGA	0.0127	0.0436034	-0.242028	Quadrant II
	y2040	CMR	0.0024	0.0350275	0.0583313	Quadrant I
	y2040	GAB	-0.000475	0.196499	0.120499	Quadrant IV
	y2040	GNQ	-0.00351	0.216359	0.256456	Quadrant IV
	y2040	NAM	-0.0477	0.273226	0.0141464	Quadrant IV
	y2040	AGO	0.0141	0.272796	-0.648348	Quadrant II
	y2040	COG	-0.000473	0.157152	-0.281034	Quadrant III
	y2040	COD	-0.0107	0.245804	-0.744708	Quadrant III
	y2040	LBY	0.000596	0.193694	0.263822	Quadrant I
	y2040	TCD	0.0201	0.107097	-0.573328	Quadrant II
	y2040	CAF	6e-05	0.286754	0.00176925	Quadrant I
	y2040	ZAF	0.0032	0.398082	0.156639	Quadrant I
	y2040	BWA	-0.0209	0.312986	-0.0857756	Quadrant III
	y2040	ZMB	-0.0381	0.124867	-0.488509	Quadrant III
	y2040	SDN	0.0493	0.274526	-0.115011	Quadrant II
	y2040	ZWE	-0.000927	0.379298	-0.264915	Quadrant III
	y2040	LSO	-0.00116	0.445734	-0.167831	Quadrant III
	y2040	BDI	0.0495	0.248269	-0.883383	Quadrant II
	y2040	RWA	0.0961	0.222068	-0.106062	Quadrant II
	y2040	TZA	0.0514	0.0768179	-0.163513	Quadrant II
	y2040	UGA	0.0907	0.124931	-0.0434682	Quadrant II
	y2040	MOZ	-0.0139	0.227852	-0.357397	Quadrant III
	y2040	SWZ	0.0124	0.37429	-0.258982	Quadrant II
	y2040	MWI	0.174	0.173787	-0.471727	Quadrant II
	y2040	ETH	0.0185	0.277551	-0.316445	Quadrant II
	y2040	EGY	0.000953	0.0592601	-0.0887902	Quadrant II
	y2040	KEN	0.0325	0.272583	-0.186277	Quadrant II
	y2040	ERI	0.000787	0.229053	-0.517339	Quadrant II
	y2040	SOM	-5.77e-05	0.191544	-0.19651	Quadrant III
	y2040	DJI	-0.0372	0.264988	-0.0102768	Quadrant III
	y2040	MDG	0.0805	0.354844	-0.513932	Quadrant II
	y2040	MUS	0.000101	0.11489	-0.0387798	Quadrant II
	y2040	ATF	0.000101	0.190438	0.23319	Quadrant I
	y2040	CHN	0.0668	0.113236	0.303206	Quadrant I
	y2040	IND	-0.074	0.0599006	-0.314501	Quadrant III
	y2040	NPL	-0.213	0.142822	-0.442952	Quadrant III
	y2040	MNG	0.000546	0.517192	0.43448	Quadrant I
	y2040	MMR	-0.0189	0.00765125	-0.0634922	Quadrant III
	y2040	LAO	-0.289	0.125321	0.155523	Quadrant IV
	y2040	THA	0.12	0.111157	0.0480423	Quadrant I
	y2040	KHM	0.00378	0.20113	0.0668217	Quadrant I
	y2040	VNM	-0.255	0.172135	0.213704	Quadrant IV
	y2040	RUS	0.000984	0.274476	0.30687	Quadrant I
	y2040	PRK	0.299	0.0933772	-1.30336	Quadrant II
	y2040	GRL	1.45e-06	0.238525	0.337802	Quadrant I
	y2040	ISL	4.07e-05	0.393711	0.476045	Quadrant I
	y2040	ESP	-0.016	0.150656	0.194644	Quadrant IV
	y2040	IRL	0.000192	0.332705	0.360872	Quadrant I
	y2040	PRT	1e-06	0.185072	0.399636	Quadrant I
	y2040	GBR	0.0014	0.341274	0.218252	Quadrant I
	y2040	FRA	-0.643	0.282037	0.276306	Quadrant IV
	y2040	BEL	0.0019	0.386399	0.324524	Quadrant I
	y2040	NLD	0.00167	0.351581	0.213542	Quadrant I
	y2040	NOR	-7.44e-05	0.259751	0.399798	Quadrant IV
	y2040	LUX	0.00236	0.167456	0.411526	Quadrant I
	y2040	DEU	-0.0833	0.45854	0.304306	Quadrant IV
	y2040	CHE	-0.00166	0.54292	0.338356	Quadrant IV
	y2040	ITA	-0.0591	0.18236	0.206682	Quadrant IV
	y2040	DNK	0.00236	0.26855	0.407464	Quadrant I
	y2040	AUT	-0.364	0.427691	0.360607	Quadrant IV
	y2040	SWE	0.000368	0.316858	0.154004	Quadrant I
	y2040	CZE	-0.0598	0.478449	0.240483	Quadrant IV
	y2040	HRV	-0.87	0.282014	0.16004	Quadrant IV
	y2040	SVN	-0.916	0.274924	0.175129	Quadrant IV
	y2040	SJM	1.06e-06	0.238513	0.332712	Quadrant I
	y2040	POL	0.00233	0.500738	0.215893	Quadrant I
	y2040	BIH	-0.00267	0.144504	0.311215	Quadrant IV
	y2040	HUN	-0.945	0.562175	0.2628	Quadrant IV
	y2040	SVK	-0.375	0.560884	0.162029	Quadrant IV
	y2040	MNE	-0.0027	0.240907	0.31685	Quadrant IV
	y2040	SRB	-0.00269	0.368456	0.212506	Quadrant IV
	y2040	ALB	-0.00216	0.199482	0.306408	Quadrant IV
	y2040	GRC	1e-06	0.0949403	0.177199	Quadrant I
	y2040	MKD	-0.00235	0.198605	0.118959	Quadrant IV
	y2040	ROU	-0.693	0.286723	0.181519	Quadrant IV
	y2040	LTU	0.00236	0.368937	0.344341	Quadrant I
	y2040	LVA	0.0023	0.315124	0.334528	Quadrant I
	y2040	FIN	5.62e-05	0.3528	0.258261	Quadrant I
	y2040	EST	0.00121	0.313387	0.336216	Quadrant I
	y2040	BGR	-0.478	0.442969	0.112666	Quadrant IV
	y2040	BLR	0.00422	0.37322	0.353164	Quadrant I
	y2040	TUR	-0.000365	0.0548791	-0.0133794	Quadrant III
	y2040	MDA	0.00493	0.352636	0.158624	Quadrant I
	y2040	CYP	1e-06	0.0851687	-0.0192466	Quadrant II
	y2040	IRN	0.00012	0.06325	-0.362623	Quadrant II
	y2040	UKR	0.00493	0.363207	0.258139	Quadrant I
	y2040	GEO	0.00341	0.336404	-0.00624626	Quadrant II
	y2040	ARM	9.36e-05	0.33047	0.160375	Quadrant I
	y2040	AZE	-0.000166	0.244195	-0.112533	Quadrant III
	y2040	KAZ	0.000466	0.347196	0.236624	Quadrant I
	y2040	TKM	-0.000332	0.326487	0.3017	Quadrant IV
	y2040	UZB	-0.000694	0.242567	0.125863	Quadrant IV
	y2040	AFG	0.00889	0.426161	-0.963016	Quadrant II
	y2040	TJK	0.000826	0.295042	-0.321988	Quadrant II
	y2040	KGZ	-0.000276	0.34931	0.0977253	Quadrant IV
	y2040	MEX	0.0485	0.321564	-0.162049	Quadrant II
	y2040	USA	0.0081	0.377233	0.266036	Quadrant I
	y2040	GTM	0.103	0.252359	-0.766216	Quadrant II
	y2040	ECU	-0.00192	0.470985	-0.169932	Quadrant III
	y2040	SLV	0.419	0.266851	-0.452952	Quadrant II
	y2040	HND	0.131	0.394649	-0.486323	Quadrant II
	y2040	BLZ	-0.0207	0.17091	0.0160795	Quadrant IV
	y2040	NIC	0.114	0.296739	-0.571198	Quadrant II
	y2040	CRI	0.0117	0.297931	-0.166143	Quadrant II
	y2040	CUB	0.013	0.370276	-0.247787	Quadrant II
	y2040	PAN	0.0239	0.261534	-0.0533086	Quadrant II
	y2040	PER	0.00153	0.0822366	-0.196944	Quadrant II
	y2040	COL	0.0105	0.485262	-0.307308	Quadrant II
	y2040	BHS	-0.0253	0.1836	0.169468	Quadrant IV
	y2040	JAM	-0.00175	0.128587	-0.19033	Quadrant III
	y2040	CHL	0.0151	0.438902	-0.0366629	Quadrant II
	y2040	HTI	0.202	0.212696	-0.549417	Quadrant II
	y2040	BRA	-0.0545	0.335684	0.0538369	Quadrant IV
	y2040	ARG	0.00251	0.625771	0.17042	Quadrant I
	y2040	VEN	0.000149	0.327776	-0.387019	Quadrant II
	y2040	DOM	0.0444	0.252266	-0.0840825	Quadrant II
	y2040	BOL	0.0151	0.561453	-0.142762	Quadrant II
	y2040	PRY	0.00155	0.390721	-0.100802	Quadrant II
	y2040	TTO	3.67e-05	0.231053	-0.346194	Quadrant II
	y2040	FLK	1e-06	0.247112	0.208225	Quadrant I
	y2040	GUY	0.00633	0.0864146	0.00684882	Quadrant I
	y2040	URY	0.0125	0.464921	0.0680853	Quadrant I
	y2040	SUR	3.56e-05	0.256928	-0.280322	Quadrant II
	y2040	GUF	7.98e-05	0.200378	0.00971493	Quadrant I
	y2040	SGS	1e-06	0.242302	0.18314	Quadrant I
	y2040	MAR	4.91e-05	0.134713	-0.0491035	Quadrant II
	y2040	TUN	0.00593	0.057509	-0.142004	Quadrant II
	y2040	SAU	0.0178	0.117981	-0.105948	Quadrant II
	y2040	ISR	1e-06	0.0370403	0.229422	Quadrant I
	y2040	JOR	9.98e-07	0.175863	-0.131201	Quadrant II
	y2040	LBN	9.99e-07	0.0624657	-0.0131574	Quadrant II
	y2040	SYR	1e-06	0.198746	0.0595138	Quadrant I
	y2040	IRQ	4.21e-05	0.177301	-0.92581	Quadrant II
	y2040	YEM	0.00916	0.334341	-1.24274	Quadrant II
	y2040	KWT	9.98e-07	0.108385	0.137195	Quadrant I
	y2040	QAT	-1.59e-06	0.223458	0.351544	Quadrant IV
	y2040	OMN	0.0524	0.0687857	0.138397	Quadrant I
	y2040	ARE	9.97e-07	0.0185213	-0.165551	Quadrant II
	y2040	PAK	0.024	0.367096	-0.276348	Quadrant II
	y2040	CAN	0.00348	0.281779	0.124641	Quadrant I
	y2040	PRI	-0.00358	0.224833	0.138085	Quadrant IV
	y2040	AUS	-0.696	0.375748	0.210278	Quadrant IV
	y2040	JPN	0.0164	0.0503987	0.0366349	Quadrant I
	y2040	NZL	0.000673	0.340813	0.216549	Quadrant I
	y2040	IDN	-0.0114	0.111785	-0.271067	Quadrant III
	y2040	MYS	-0.0072	0.107832	0.0741873	Quadrant IV
	y2040	SGP	-0.0084	0.235935	0.357516	Quadrant IV
	y2040	BRN	-0.0084	0.119586	0.0158176	Quadrant IV
	y2040	PHL	0.0357	0.261233	0.0768691	Quadrant I
	y2040	TLS	0.012	0.350393	-0.325122	Quadrant II
	y2040	KOR	0.302	0.06807	0.195878	Quadrant I
	y2040	PNG	-0.134	0.219165	-0.0959098	Quadrant III
	y2040	SLB	-0.0084	0.136622	0.00506637	Quadrant IV
	y2040	NCL	-0.254	0.129765	0.253786	Quadrant IV
	y2040	VUT	-0.0084	0.114888	0.154943	Quadrant IV
	y2040	FJI	-0.00101	0.04976	0.103921	Quadrant IV
	y2040	REU	-0.00122	0.212427	0.273871	Quadrant IV
	y2040	LKA	-0.262	0.0255687	-0.301755	Quadrant III
	y2040	BGD	-0.241	0.11521	-0.28915	Quadrant III
	y2040	BTN	0.161	0.196347	0.268269	Quadrant I
	y2050	SEN	-0.0625	0.0324398	-0.27753	Quadrant III
	y2050	GMB	0.0197	0.11636	-0.284083	Quadrant II
	y2050	MRT	0.0167	0.363573	-0.209473	Quadrant II
	y2050	ESH	-0.0294	0.219226	-0.325436	Quadrant III
	y2050	GNB	0.00507	0.491319	-0.0798121	Quadrant II
	y2050	GIN	-0.00444	0.103123	0.121404	Quadrant IV
	y2050	SLE	-0.00488	-0.00472139	-0.0784802	Quadrant III
	y2050	MLI	-0.0636	0.355347	-0.182398	Quadrant III
	y2050	LBR	-0.0056	0.236155	-0.327942	Quadrant III
	y2050	CIV	-0.00619	0.191336	0.21043	Quadrant IV
	y2050	BFA	-0.0751	0.110512	0.251318	Quadrant IV
	y2050	GHA	-0.0023	0.198364	0.106461	Quadrant IV
	y2050	TGO	-0.0229	0.0557636	-0.235397	Quadrant III
	y2050	NER	-0.0331	0.0476134	-0.268149	Quadrant III
	y2050	BEN	0.0364	0.00579737	-0.185385	Quadrant II
	y2050	DZA	-0.00833	0.155248	-0.532094	Quadrant III
	y2050	NGA	-0.122	0.0243518	-0.187849	Quadrant III
	y2050	CMR	-1.13	0.0460142	0.0920025	Quadrant IV
	y2050	GAB	-0.000665	0.244559	0.0672843	Quadrant IV
	y2050	GNQ	-0.00962	0.282038	0.199876	Quadrant IV
	y2050	NAM	-0.0938	0.350817	-0.0213409	Quadrant III
	y2050	AGO	-0.0107	0.306652	-0.523584	Quadrant III
	y2050	COG	-0.00104	0.218071	-0.173032	Quadrant III
	y2050	COD	-0.0168	0.228326	-0.462512	Quadrant III
	y2050	LBY	-0.01	0.253166	0.270367	Quadrant IV
	y2050	TCD	-1.51	0.0481008	-0.39756	Quadrant III
	y2050	CAF	-0.752	0.384777	0.0470327	Quadrant IV
	y2050	ZAF	0.0484	0.498649	0.0831901	Quadrant I
	y2050	BWA	-8.83e-06	0.4144	-0.222343	Quadrant III
	y2050	ZMB	-0.0224	0.0964702	-0.303562	Quadrant III
	y2050	SDN	0.0143	0.411243	-0.10189	Quadrant II
	y2050	ZWE	-0.0982	0.454216	-0.18263	Quadrant III
	y2050	LSO	-1.81e-05	0.553937	-0.0579094	Quadrant III
	y2050	BDI	-0.00491	0.222577	-0.539469	Quadrant III
	y2050	RWA	-0.00845	0.238173	-0.0795136	Quadrant III
	y2050	TZA	0.0172	0.072883	-0.124822	Quadrant II
	y2050	UGA	-0.00598	0.161342	0.030954	Quadrant IV
	y2050	MOZ	-0.393	0.246809	-0.194658	Quadrant III
	y2050	SWZ	0.0719	0.46442	-0.349218	Quadrant II
	y2050	MWI	0.132	0.150659	-0.30205	Quadrant II
	y2050	ETH	0.022	0.341815	-0.261796	Quadrant II
	y2050	EGY	-0.00737	0.0471958	-0.0452969	Quadrant III
	y2050	KEN	0.00458	0.37661	-0.231606	Quadrant II
	y2050	ERI	-0.0035	0.24151	-0.65735	Quadrant III
	y2050	SOM	0.00211	0.22305	-0.432576	Quadrant II
	y2050	DJI	0.0449	0.354282	-0.132174	Quadrant II
	y2050	MDG	0.0535	0.377164	-0.39327	Quadrant II
	y2050	MUS	0.000101	0.118938	-0.15154	Quadrant II
	y2050	ATF	0.000101	0.24294	0.151464	Quadrant I
	y2050	CHN	0.122	0.177965	0.419871	Quadrant I
	y2050	IND	-0.0565	0.0638809	-0.243205	Quadrant III
	y2050	NPL	-0.124	0.164394	-0.403389	Quadrant III
	y2050	MNG	0.00571	0.824099	0.41126	Quadrant I
	y2050	MMR	0.00497	0.0194972	-0.0962591	Quadrant II
	y2050	LAO	-0.203	0.161334	0.152036	Quadrant IV
	y2050	THA	0.175	0.152977	-0.00689346	Quadrant II
	y2050	KHM	0.0326	0.26197	0.0855746	Quadrant I
	y2050	VNM	-0.157	0.253044	0.165815	Quadrant IV
	y2050	RUS	-6.5e-05	0.373358	0.343283	Quadrant IV
	y2050	PRK	0.314	0.0785384	-1.7913	Quadrant II
	y2050	GRL	6.91e-07	0.31632	0.401761	Quadrant I
	y2050	ISL	-2.79e-05	0.551178	0.533596	Quadrant IV
	y2050	ESP	-0.0164	0.201193	0.324472	Quadrant IV
	y2050	IRL	0.000188	0.434564	0.46207	Quadrant I
	y2050	PRT	1e-06	0.259467	0.501149	Quadrant I
	y2050	GBR	0.00148	0.462315	0.348657	Quadrant I
	y2050	FRA	-0.642	0.386022	0.39946	Quadrant IV
	y2050	BEL	0.00205	0.517278	0.439555	Quadrant I
	y2050	NLD	0.0018	0.477223	0.347587	Quadrant I
	y2050	NOR	-3.87e-05	0.351116	0.465526	Quadrant IV
	y2050	LUX	0.00256	0.260624	0.506696	Quadrant I
	y2050	DEU	-0.083	0.618288	0.420252	Quadrant IV
	y2050	CHE	-0.000185	0.742817	0.41251	Quadrant IV
	y2050	ITA	-0.0591	0.24561	0.342628	Quadrant IV
	y2050	DNK	0.00256	0.384183	0.509823	Quadrant I
	y2050	AUT	-0.357	0.587763	0.465791	Quadrant IV
	y2050	SWE	0.000377	0.424382	0.29547	Quadrant I
	y2050	CZE	-0.0595	0.655743	0.366653	Quadrant IV
	y2050	HRV	-0.87	0.40419	0.302532	Quadrant IV
	y2050	SVN	-0.917	0.383736	0.310946	Quadrant IV
	y2050	SJM	9.53e-07	0.316888	0.397062	Quadrant I
	y2050	POL	0.00252	0.689932	0.343938	Quadrant I
	y2050	BIH	-0.000275	0.21157	0.408243	Quadrant IV
	y2050	HUN	-0.946	0.805874	0.387996	Quadrant IV
	y2050	SVK	-0.371	0.76991	0.299505	Quadrant IV
	y2050	MNE	-0.000278	0.383617	0.401783	Quadrant IV
	y2050	SRB	-0.000277	0.507644	0.305687	Quadrant IV
	y2050	ALB	-0.000224	0.310981	0.393954	Quadrant IV
	y2050	GRC	1e-06	0.150036	0.321934	Quadrant I
	y2050	MKD	-0.000244	0.299831	0.23618	Quadrant IV
	y2050	ROU	-0.692	0.408257	0.322453	Quadrant IV
	y2050	LTU	0.00256	0.511414	0.450124	Quadrant I
	y2050	LVA	0.00249	0.445355	0.44481	Quadrant I
	y2050	FIN	4.4e-05	0.49927	0.384708	Quadrant I
	y2050	EST	0.00128	0.442855	0.447798	Quadrant I
	y2050	BGR	-0.476	0.603394	0.267437	Quadrant IV
	y2050	BLR	-0.000453	0.521176	0.392336	Quadrant IV
	y2050	TUR	-3.83e-05	0.081309	0.115311	Quadrant IV
	y2050	MDA	-0.00112	0.482654	0.210389	Quadrant IV
	y2050	CYP	9.98e-07	0.133529	0.148184	Quadrant I
	y2050	IRN	-0.000292	0.0706258	-0.288943	Quadrant III
	y2050	UKR	-0.00107	0.512915	0.322506	Quadrant IV
	y2050	GEO	-4.09e-05	0.45101	0.0584602	Quadrant IV
	y2050	ARM	-0.00192	0.496905	0.193373	Quadrant IV
	y2050	AZE	-0.00569	0.299544	-0.060433	Quadrant III
	y2050	KAZ	0.000715	0.480569	0.249431	Quadrant I
	y2050	TKM	-0.00399	0.442012	0.312041	Quadrant IV
	y2050	UZB	-0.00753	0.352155	0.173955	Quadrant IV
	y2050	AFG	0.0385	0.471974	-0.667059	Quadrant II
	y2050	TJK	-0.00563	0.458063	-0.131114	Quadrant III
	y2050	KGZ	-0.00517	0.5299	0.18937	Quadrant IV
	y2050	MEX	0.0346	0.436947	-0.162882	Quadrant II
	y2050	USA	0.00916	0.499586	0.376572	Quadrant I
	y2050	GTM	0.0566	0.360466	-0.705077	Quadrant II
	y2050	ECU	0.00696	0.638109	-0.118257	Quadrant II
	y2050	SLV	0.23	0.37476	-0.385437	Quadrant II
	y2050	HND	0.0348	0.573482	-0.371977	Quadrant II
	y2050	BLZ	-0.0177	0.258026	0.05509	Quadrant IV
	y2050	NIC	0.0458	0.429447	-0.45096	Quadrant II
	y2050	CRI	-0.00214	0.397636	-0.171097	Quadrant III
	y2050	CUB	0.0116	0.519748	-0.245146	Quadrant II
	y2050	PAN	0.000219	0.325252	-0.0535375	Quadrant II
	y2050	PER	0.0898	0.114573	-0.182783	Quadrant II
	y2050	COL	0.0133	0.649896	-0.300701	Quadrant II
	y2050	BHS	-0.0222	0.269462	0.149343	Quadrant IV
	y2050	JAM	0.000515	0.176814	-0.163947	Quadrant II
	y2050	CHL	0.0368	0.613067	-0.0414608	Quadrant II
	y2050	HTI	0.13	0.318028	-0.312316	Quadrant II
	y2050	BRA	0.12	0.451473	0.0508849	Quadrant I
	y2050	ARG	0.425	0.867722	0.187148	Quadrant I
	y2050	VEN	0.367	0.435262	-0.357068	Quadrant II
	y2050	DOM	0.02	0.328864	-0.104166	Quadrant II
	y2050	BOL	0.0674	0.805771	-0.0722728	Quadrant II
	y2050	PRY	0.0973	0.552776	-0.0894506	Quadrant II
	y2050	TTO	0.0959	0.294888	-0.398544	Quadrant II
	y2050	FLK	1e-06	0.327583	0.170911	Quadrant I
	y2050	GUY	0.0688	0.139139	-0.018274	Quadrant II
	y2050	URY	0.513	0.641846	0.0822409	Quadrant I
	y2050	SUR	4.33e-05	0.33827	-0.239889	Quadrant II
	y2050	GUF	0.000108	0.244337	-0.0483538	Quadrant II
	y2050	SGS	1e-06	0.318834	0.150973	Quadrant I
	y2050	MAR	6.36e-05	0.145622	0.0502722	Quadrant I
	y2050	TUN	-0.0477	0.0708761	-0.0829913	Quadrant III
	y2050	SAU	-0.0347	0.14045	-0.0663008	Quadrant III
	y2050	ISR	1e-06	0.0559656	0.27251	Quadrant I
	y2050	JOR	1e-06	0.248393	0.00292453	Quadrant I
	y2050	LBN	2.15e-05	0.106477	0.0572793	Quadrant I
	y2050	SYR	-7.24e-05	0.269983	0.164809	Quadrant IV
	y2050	IRQ	0.000427	0.194693	-0.789991	Quadrant II
	y2050	YEM	-0.0152	0.368565	-0.678561	Quadrant III
	y2050	KWT	9.99e-07	0.143279	0.180028	Quadrant I
	y2050	QAT	2.54e-06	0.303319	0.343783	Quadrant I
	y2050	OMN	-0.0871	0.0769297	0.132276	Quadrant IV
	y2050	ARE	9.75e-07	0.00795098	-0.17122	Quadrant II
	y2050	PAK	0.0381	0.510986	-0.247715	Quadrant II
	y2050	CAN	-0.000185	0.368631	0.0111023	Quadrant IV
	y2050	PRI	-0.000925	0.296339	0.112831	Quadrant IV
	y2050	AUS	-1.51	0.505614	0.110434	Quadrant IV
	y2050	JPN	-0.0627	0.0569049	0.0413906	Quadrant IV
	y2050	NZL	-3.47e-05	0.473095	0.121211	Quadrant IV
	y2050	IDN	-0.00249	0.110219	-0.322654	Quadrant III
	y2050	MYS	0.0028	0.141872	-0.0111897	Quadrant II
	y2050	SGP	0.00325	0.313931	0.294226	Quadrant I
	y2050	BRN	0.00325	0.143476	-0.0988656	Quadrant II
	y2050	PHL	0.071	0.333795	0.0352899	Quadrant I
	y2050	TLS	-0.000805	0.482815	-0.163258	Quadrant III
	y2050	KOR	0.318	0.0857899	0.121239	Quadrant I
	y2050	PNG	-0.0935	0.319321	0.00190146	Quadrant IV
	y2050	SLB	0.00325	0.219604	0.0872878	Quadrant I
	y2050	NCL	-0.242	0.180488	0.17703	Quadrant IV
	y2050	VUT	0.00325	0.218429	0.19132	Quadrant I
	y2050	FJI	0.00488	0.0900214	0.071917	Quadrant I
	y2050	REU	-0.000333	0.264559	0.156994	Quadrant IV
	y2050	LKA	-0.165	0.0386142	-0.309834	Quadrant III
	y2050	BGD	-0.121	0.105917	-0.266297	Quadrant III
	y2050	BTN	0.165	0.267046	0.235274	Quadrant I
	y2060	SEN	-0.125	0.0559535	-0.0433555	Quadrant III
	y2060	GMB	-0.0172	0.115074	-0.0395883	Quadrant III
	y2060	MRT	-0.0188	0.381574	-0.0582576	Quadrant III
	y2060	ESH	-0.0286	0.216692	-0.260237	Quadrant III
	y2060	GNB	-0.00251	0.581437	0.138761	Quadrant IV
	y2060	GIN	0.0132	0.125015	0.248918	Quadrant I
	y2060	SLE	0.188	0.0212883	0.176511	Quadrant I
	y2060	MLI	-0.119	0.32783	0.0141796	Quadrant IV
	y2060	LBR	0.208	0.24223	0.000903133	Quadrant I
	y2060	CIV	-0.0467	0.205544	0.319963	Quadrant IV
	y2060	BFA	-0.146	0.0966024	0.399913	Quadrant IV
	y2060	GHA	-0.0289	0.206448	0.255374	Quadrant IV
	y2060	TGO	-0.0894	0.0844338	0.0382869	Quadrant IV
	y2060	NER	-0.0802	0.0525368	-0.0390782	Quadrant III
	y2060	BEN	0.0187	0.0116258	0.0387244	Quadrant I
	y2060	DZA	0.0081	0.15505	-0.350548	Quadrant II
	y2060	NGA	-0.129	0.03616	0.0366534	Quadrant IV
	y2060	CMR	-0.0369	0.063488	0.24083	Quadrant IV
	y2060	GAB	-0.000897	0.248306	0.166492	Quadrant IV
	y2060	GNQ	0.0117	0.28683	0.279526	Quadrant I
	y2060	NAM	0.00591	0.34989	0.101675	Quadrant I
	y2060	AGO	0.0176	0.290578	-0.139246	Quadrant II
	y2060	COG	0.107	0.234745	0.032426	Quadrant I
	y2060	COD	-0.0102	0.222483	-0.0825036	Quadrant III
	y2060	LBY	-0.00383	0.250769	0.312317	Quadrant IV
	y2060	TCD	-0.096	0.0697181	-0.0805925	Quadrant III
	y2060	CAF	-0.0265	0.408663	0.231316	Quadrant IV
	y2060	ZAF	0.0075	0.490762	0.171349	Quadrant I
	y2060	BWA	0.000357	0.413037	-0.117468	Quadrant II
	y2060	ZMB	-0.0123	0.112212	-0.0197528	Quadrant III
	y2060	SDN	0.0343	0.464264	0.0777084	Quadrant I
	y2060	ZWE	0.00363	0.501145	0.0863	Quadrant I
	y2060	LSO	5.48e-05	0.580435	0.1511	Quadrant I
	y2060	BDI	0.0399	0.21186	-0.117475	Quadrant II
	y2060	RWA	0.0605	0.240914	0.115899	Quadrant I
	y2060	TZA	0.00654	0.094106	0.0831866	Quadrant I
	y2060	UGA	0.0482	0.210483	0.226171	Quadrant I
	y2060	MOZ	-0.0135	0.275738	0.0666881	Quadrant IV
	y2060	SWZ	0.019	0.46679	-0.173856	Quadrant II
	y2060	MWI	0.165	0.164443	0.0177748	Quadrant I
	y2060	ETH	0.0251	0.382351	-0.0221639	Quadrant II
	y2060	EGY	-0.00654	0.0405418	0.0483184	Quadrant IV
	y2060	KEN	0.0104	0.408387	-0.0358114	Quadrant II
	y2060	ERI	-0.0105	0.22849	-0.40402	Quadrant III
	y2060	SOM	0.00211	0.226915	-0.416034	Quadrant II
	y2060	DJI	4.64e-05	0.36633	-0.0192815	Quadrant II
	y2060	MDG	-0.00356	0.351909	-0.0817553	Quadrant III
	y2060	MUS	0.000101	0.114536	-0.0472672	Quadrant II
	y2060	ATF	0.000101	0.238534	0.171813	Quadrant I
	y2060	CHN	0.127	0.181656	0.419187	Quadrant I
	y2060	IND	-0.0196	0.0758943	-0.10538	Quadrant III
	y2060	NPL	-0.107	0.162907	-0.225268	Quadrant III
	y2060	MNG	-0.0715	0.840534	0.453708	Quadrant IV
	y2060	MMR	-0.0275	0.0401896	-0.00650531	Quadrant III
	y2060	LAO	-0.161	0.171081	0.227471	Quadrant IV
	y2060	THA	0.0733	0.162051	0.0443765	Quadrant I
	y2060	KHM	-0.0103	0.280112	0.184548	Quadrant IV
	y2060	VNM	-0.121	0.259624	0.218036	Quadrant IV
	y2060	RUS	-9.62e-05	0.369968	0.350739	Quadrant IV
	y2060	PRK	0.101	0.0856327	-2.05064	Quadrant II
	y2060	GRL	9.7e-07	0.309892	0.346535	Quadrant I
	y2060	ISL	-1.1e-06	0.547433	0.495778	Quadrant IV
	y2060	ESP	-0.0155	0.20401	0.313309	Quadrant IV
	y2060	IRL	0.000133	0.425765	0.446525	Quadrant I
	y2060	PRT	1e-06	0.258129	0.491607	Quadrant I
	y2060	GBR	0.00106	0.460855	0.335012	Quadrant I
	y2060	FRA	-0.632	0.386028	0.389106	Quadrant IV
	y2060	BEL	0.00149	0.510295	0.427453	Quadrant I
	y2060	NLD	0.00132	0.471759	0.331824	Quadrant I
	y2060	NOR	-5.38e-05	0.346178	0.419447	Quadrant IV
	y2060	LUX	0.00185	0.261236	0.489984	Quadrant I
	y2060	DEU	-0.0778	0.614647	0.406662	Quadrant IV
	y2060	CHE	-0.000762	0.741549	0.364168	Quadrant IV
	y2060	ITA	-0.0595	0.243795	0.330924	Quadrant IV
	y2060	DNK	0.00185	0.380021	0.497499	Quadrant I
	y2060	AUT	-0.338	0.581916	0.451486	Quadrant IV
	y2060	SWE	0.00027	0.42185	0.279372	Quadrant I
	y2060	CZE	-0.0585	0.654842	0.353814	Quadrant IV
	y2060	HRV	-0.785	0.402494	0.289326	Quadrant IV
	y2060	SVN	-0.714	0.382161	0.299868	Quadrant IV
	y2060	SJM	9.88e-07	0.311078	0.341736	Quadrant I
	y2060	POL	0.00182	0.689509	0.329016	Quadrant I
	y2060	BIH	-0.00119	0.216128	0.37331	Quadrant IV
	y2060	HUN	-0.956	0.816256	0.375233	Quadrant IV
	y2060	SVK	-0.364	0.760891	0.281583	Quadrant IV
	y2060	MNE	-0.00121	0.392108	0.363171	Quadrant IV
	y2060	SRB	-0.0012	0.51154	0.254659	Quadrant IV
	y2060	ALB	-0.000981	0.315317	0.354685	Quadrant IV
	y2060	GRC	1e-06	0.153511	0.31409	Quadrant I
	y2060	MKD	-0.00107	0.304258	0.186074	Quadrant IV
	y2060	ROU	-0.693	0.411671	0.314813	Quadrant IV
	y2060	LTU	0.00185	0.512178	0.437491	Quadrant I
	y2060	LVA	0.0018	0.443528	0.43574	Quadrant I
	y2060	FIN	3.31e-05	0.504565	0.373335	Quadrant I
	y2060	EST	0.000912	0.445401	0.440047	Quadrant I
	y2060	BGR	-0.471	0.603372	0.259806	Quadrant IV
	y2060	BLR	-0.00043	0.520166	0.399335	Quadrant IV
	y2060	TUR	-0.000177	0.0832648	0.0551111	Quadrant IV
	y2060	MDA	-0.00109	0.488031	0.223219	Quadrant IV
	y2060	CYP	1.01e-06	0.133989	0.129766	Quadrant I
	y2060	IRN	-0.000845	0.066557	-0.188113	Quadrant III
	y2060	UKR	-0.00103	0.518988	0.341249	Quadrant IV
	y2060	GEO	-6.68e-05	0.452703	0.0771731	Quadrant IV
	y2060	ARM	-0.00161	0.502251	0.199301	Quadrant IV
	y2060	AZE	-0.00528	0.297351	-0.0202773	Quadrant III
	y2060	KAZ	0.00117	0.472241	0.242779	Quadrant I
	y2060	TKM	-0.00386	0.429464	0.308397	Quadrant IV
	y2060	UZB	-0.00726	0.357178	0.192432	Quadrant IV
	y2060	AFG	0.00264	0.468583	-0.311756	Quadrant II
	y2060	TJK	-0.00533	0.491027	-0.0519633	Quadrant III
	y2060	KGZ	-0.00485	0.556576	0.230218	Quadrant IV
	y2060	MEX	0.102	0.44692	-0.00874089	Quadrant II
	y2060	USA	0.0191	0.494381	0.354186	Quadrant I
	y2060	GTM	0.0981	0.38993	-0.41968	Quadrant II
	y2060	ECU	0.0298	0.646591	0.047734	Quadrant I
	y2060	SLV	0.386	0.397179	-0.166669	Quadrant II
	y2060	HND	0.109	0.61532	-0.129413	Quadrant II
	y2060	BLZ	-0.0204	0.277964	0.199323	Quadrant IV
	y2060	NIC	0.107	0.464865	-0.191033	Quadrant II
	y2060	CRI	-0.00488	0.403602	-0.0272622	Quadrant III
	y2060	CUB	0.0138	0.544464	-0.0751228	Quadrant II
	y2060	PAN	5.71e-05	0.321312	0.0705677	Quadrant I
	y2060	PER	0.101	0.12297	-0.0251693	Quadrant II
	y2060	COL	-0.00104	0.657283	-0.131293	Quadrant III
	y2060	BHS	-0.0249	0.266575	0.242138	Quadrant IV
	y2060	JAM	-0.00139	0.191808	0.00968331	Quadrant IV
	y2060	CHL	0.0401	0.618413	0.0828203	Quadrant I
	y2060	HTI	0.208	0.371069	-0.0183157	Quadrant II
	y2060	BRA	0.0218	0.459767	0.169247	Quadrant I
	y2060	ARG	0.247	0.863207	0.290208	Quadrant I
	y2060	VEN	-0.000758	0.444446	-0.165567	Quadrant III
	y2060	DOM	0.0476	0.329377	0.0257229	Quadrant I
	y2060	BOL	0.137	0.841053	0.0983373	Quadrant I
	y2060	PRY	0.0207	0.573277	0.0602481	Quadrant I
	y2060	TTO	2.38e-05	0.295228	-0.2413	Quadrant II
	y2060	FLK	1e-06	0.321623	0.25567	Quadrant I
	y2060	GUY	0.00519	0.146758	0.0999208	Quadrant I
	y2060	URY	0.132	0.640053	0.195947	Quadrant I
	y2060	SUR	7.32e-05	0.341864	-0.06514	Quadrant II
	y2060	GUF	0.000391	0.235778	0.0403074	Quadrant I
	y2060	SGS	1e-06	0.313051	0.237288	Quadrant I
	y2060	MAR	6.28e-05	0.135861	0.146128	Quadrant I
	y2060	TUN	-0.0408	0.0706069	0.0142691	Quadrant IV
	y2060	SAU	-0.0984	0.134782	-0.0389944	Quadrant III
	y2060	ISR	9.99e-07	0.054982	0.308403	Quadrant I
	y2060	JOR	1e-06	0.257688	0.0920815	Quadrant I
	y2060	LBN	2.03e-05	0.108252	0.139844	Quadrant I
	y2060	SYR	-7.95e-05	0.28124	0.250286	Quadrant IV
	y2060	IRQ	0.000486	0.189476	-0.678257	Quadrant II
	y2060	YEM	-0.037	0.363504	-0.314106	Quadrant III
	y2060	KWT	1e-06	0.13913	0.201533	Quadrant I
	y2060	QAT	2.57e-06	0.299091	0.375226	Quadrant I
	y2060	OMN	-0.268	0.0733207	0.186943	Quadrant IV
	y2060	ARE	9.96e-07	0.00314771	-0.138591	Quadrant II
	y2060	PAK	0.0146	0.544745	-0.114055	Quadrant II
	y2060	CAN	-0.00354	0.362414	0.270388	Quadrant IV
	y2060	PRI	-0.00332	0.294802	0.208409	Quadrant IV
	y2060	AUS	-1.37	0.49716	0.346265	Quadrant IV
	y2060	JPN	-0.111	0.0583224	0.0839879	Quadrant IV
	y2060	NZL	-0.000669	0.468294	0.356031	Quadrant IV
	y2060	IDN	0.0143	0.110315	-0.23981	Quadrant II
	y2060	MYS	0.0308	0.144687	0.0219672	Quadrant I
	y2060	SGP	0.0356	0.308199	0.306451	Quadrant I
	y2060	BRN	0.0356	0.140512	-0.0782161	Quadrant II
	y2060	PHL	0.0438	0.343301	0.108362	Quadrant I
	y2060	TLS	-0.00287	0.526829	0.0152307	Quadrant IV
	y2060	KOR	0.104	0.0844996	0.142524	Quadrant I
	y2060	PNG	-0.0738	0.355853	0.133187	Quadrant IV
	y2060	SLB	0.0356	0.258887	0.210312	Quadrant I
	y2060	NCL	-0.126	0.173867	0.194292	Quadrant IV
	y2060	VUT	0.0356	0.266832	0.280236	Quadrant I
	y2060	FJI	0.0328	0.105321	0.148683	Quadrant I
	y2060	REU	0.000882	0.258065	0.203141	Quadrant I
	y2060	LKA	-0.107	0.0480623	-0.199451	Quadrant III
	y2060	BGD	-0.0619	0.100673	-0.129762	Quadrant III
	y2060	BTN	0.0683	0.271647	0.277025	Quadrant I
	y2070	SEN	-0.055	0.0559535	0.0349211	Quadrant IV
	y2070	GMB	-0.045	0.115074	0.0403326	Quadrant IV
	y2070	MRT	0.0753	0.381574	-0.0110916	Quadrant II
	y2070	ESH	-0.0278	0.216692	-0.259915	Quadrant III
	y2070	GNB	0.016	0.581437	0.200203	Quadrant I
	y2070	GIN	0.0511	0.125015	0.271706	Quadrant I
	y2070	SLE	0.323	0.0212883	0.268713	Quadrant I
	y2070	MLI	0.411	0.32783	0.088584	Quadrant I
	y2070	LBR	0.351	0.24223	0.113436	Quadrant I
	y2070	CIV	-0.0896	0.205544	0.337648	Quadrant IV
	y2070	BFA	0.383	0.0966024	0.451613	Quadrant I
	y2070	GHA	-0.0555	0.206448	0.296996	Quadrant IV
	y2070	TGO	-0.124	0.0844338	0.14484	Quadrant IV
	y2070	NER	-0.202	0.0525368	0.0704479	Quadrant IV
	y2070	BEN	-0.00619	0.0116258	0.119795	Quadrant IV
	y2070	DZA	0.00917	0.15505	-0.259622	Quadrant II
	y2070	NGA	-0.308	0.03616	0.109137	Quadrant IV
	y2070	CMR	-0.0337	0.063488	0.282283	Quadrant IV
	y2070	GAB	0.000548	0.248306	0.173823	Quadrant I
	y2070	GNQ	0.0646	0.28683	0.281313	Quadrant I
	y2070	NAM	0.00183	0.34989	0.121766	Quadrant I
	y2070	AGO	0.0123	0.290578	0.0061242	Quadrant I
	y2070	COG	0.218	0.234745	0.0799684	Quadrant I
	y2070	COD	-0.0127	0.222483	0.053408	Quadrant IV
	y2070	LBY	0.000512	0.250769	0.312517	Quadrant I
	y2070	TCD	0.353	0.0697181	0.0352835	Quadrant I
	y2070	CAF	-0.0882	0.408663	0.303718	Quadrant IV
	y2070	ZAF	0.00502	0.490762	0.174411	Quadrant I
	y2070	BWA	0.00046	0.413037	-0.122666	Quadrant II
	y2070	ZMB	-0.0039	0.112212	0.0783758	Quadrant IV
	y2070	SDN	0.034	0.464264	0.193713	Quadrant I
	y2070	ZWE	-0.00565	0.501145	0.193622	Quadrant IV
	y2070	LSO	-9.63e-06	0.580435	0.218957	Quadrant IV
	y2070	BDI	-0.000259	0.21186	0.0395212	Quadrant IV
	y2070	RWA	-0.00082	0.240914	0.181379	Quadrant IV
	y2070	TZA	-0.0159	0.094106	0.156406	Quadrant IV
	y2070	UGA	-0.00682	0.210483	0.29487	Quadrant IV
	y2070	MOZ	-0.0146	0.275738	0.149317	Quadrant IV
	y2070	SWZ	0.00714	0.46679	-0.124897	Quadrant II
	y2070	MWI	0.0381	0.164443	0.146771	Quadrant I
	y2070	ETH	0.0146	0.382351	0.0673827	Quadrant I
	y2070	EGY	0.000644	0.0405418	0.0771445	Quadrant I
	y2070	KEN	-0.109	0.408387	0.0322949	Quadrant IV
	y2070	ERI	-0.0401	0.22849	-0.258705	Quadrant III
	y2070	SOM	-0.0173	0.226915	-0.515985	Quadrant III
	y2070	DJI	9.91e-05	0.36633	0.00117736	Quadrant I
	y2070	MDG	-0.00436	0.351909	0.0366289	Quadrant IV
	y2070	MUS	0.000101	0.114536	-0.0467906	Quadrant II
	y2070	ATF	0.000101	0.238534	0.182235	Quadrant I
	y2070	CHN	0.173	0.181656	0.423238	Quadrant I
	y2070	IND	0.00601	0.0758943	-0.0163483	Quadrant II
	y2070	NPL	-0.0466	0.162907	-0.0948589	Quadrant III
	y2070	MNG	-0.000334	0.840534	0.467335	Quadrant IV
	y2070	MMR	-0.0771	0.0401896	0.0644765	Quadrant IV
	y2070	LAO	-0.102	0.171081	0.284184	Quadrant IV
	y2070	THA	0.0351	0.162051	0.0809521	Quadrant I
	y2070	KHM	-0.06	0.280112	0.251265	Quadrant IV
	y2070	VNM	-0.0535	0.259624	0.256361	Quadrant IV
	y2070	RUS	-0.000298	0.369968	0.35173	Quadrant IV
	y2070	PRK	0.0588	0.0856327	-2.27512	Quadrant II
	y2070	GRL	1.01e-06	0.309892	0.357349	Quadrant I
	y2070	ISL	3.63e-06	0.547433	0.510938	Quadrant I
	y2070	ESP	-0.013	0.20401	0.302163	Quadrant IV
	y2070	IRL	0.00383	0.425765	0.43094	Quadrant I
	y2070	PRT	1e-06	0.258129	0.483027	Quadrant I
	y2070	GBR	0.0019	0.460855	0.322758	Quadrant I
	y2070	FRA	-0.614	0.386028	0.377803	Quadrant IV
	y2070	BEL	0.00148	0.510295	0.414811	Quadrant I
	y2070	NLD	0.00126	0.471759	0.313571	Quadrant I
	y2070	NOR	0.0162	0.346178	0.435469	Quadrant I
	y2070	LUX	0.00174	0.261236	0.475624	Quadrant I
	y2070	DEU	-0.0677	0.614647	0.394808	Quadrant IV
	y2070	CHE	0.138	0.741549	0.385451	Quadrant I
	y2070	ITA	-0.0592	0.243795	0.317628	Quadrant IV
	y2070	DNK	0.00174	0.380021	0.486268	Quadrant I
	y2070	AUT	-0.296	0.581916	0.439594	Quadrant IV
	y2070	SWE	0.00281	0.42185	0.265996	Quadrant I
	y2070	CZE	-0.0565	0.654842	0.343386	Quadrant IV
	y2070	HRV	-0.54	0.402494	0.275942	Quadrant IV
	y2070	SVN	-0.296	0.382161	0.286565	Quadrant IV
	y2070	SJM	1.02e-06	0.311078	0.35437	Quadrant I
	y2070	POL	0.00177	0.689509	0.319676	Quadrant I
	y2070	BIH	0.174	0.216128	0.400918	Quadrant I
	y2070	HUN	-1.05	0.816256	0.363324	Quadrant IV
	y2070	SVK	-0.358	0.760891	0.267723	Quadrant IV
	y2070	MNE	0.174	0.392108	0.393072	Quadrant I
	y2070	SRB	0.174	0.51154	0.281721	Quadrant I
	y2070	ALB	0.159	0.315317	0.387177	Quadrant I
	y2070	GRC	1e-06	0.153511	0.303122	Quadrant I
	y2070	MKD	0.165	0.304258	0.226223	Quadrant I
	y2070	ROU	-0.719	0.411671	0.306839	Quadrant IV
	y2070	LTU	0.00174	0.512178	0.432829	Quadrant I
	y2070	LVA	0.0018	0.443528	0.428398	Quadrant I
	y2070	FIN	0.00371	0.504565	0.363537	Quadrant I
	y2070	EST	0.0029	0.445401	0.431867	Quadrant I
	y2070	BGR	-0.456	0.603372	0.246494	Quadrant IV
	y2070	BLR	-0.000453	0.520166	0.400895	Quadrant IV
	y2070	TUR	0.0503	0.0832648	0.0973873	Quadrant I
	y2070	MDA	-0.00109	0.488031	0.232661	Quadrant IV
	y2070	CYP	1.01e-06	0.133989	0.117507	Quadrant I
	y2070	IRN	-0.00104	0.066557	-0.186558	Quadrant III
	y2070	UKR	-0.00104	0.518988	0.349891	Quadrant IV
	y2070	GEO	-0.000111	0.452703	0.0874422	Quadrant IV
	y2070	ARM	-0.00416	0.502251	0.203193	Quadrant IV
	y2070	AZE	-0.0104	0.297351	0.01404	Quadrant IV
	y2070	KAZ	-0.000196	0.472241	0.235448	Quadrant IV
	y2070	TKM	-0.00712	0.429464	0.30212	Quadrant IV
	y2070	UZB	-0.0132	0.357178	0.207326	Quadrant IV
	y2070	AFG	0.00193	0.468583	-0.110507	Quadrant II
	y2070	TJK	-0.0111	0.491027	-0.00791229	Quadrant III
	y2070	KGZ	-0.00934	0.556576	0.2551	Quadrant IV
	y2070	MEX	-0.0505	0.44692	0.00907032	Quadrant IV
	y2070	USA	0.0227	0.494381	0.35431	Quadrant I
	y2070	GTM	-0.00781	0.38993	-0.352794	Quadrant III
	y2070	ECU	0.00161	0.646591	0.0755272	Quadrant I
	y2070	SLV	0.0678	0.397179	-0.121441	Quadrant II
	y2070	HND	-0.0965	0.61532	-0.0687985	Quadrant III
	y2070	BLZ	-0.0216	0.277964	0.22721	Quadrant IV
	y2070	NIC	-0.0781	0.464865	-0.132069	Quadrant III
	y2070	CRI	-0.0173	0.403602	-0.0140666	Quadrant III
	y2070	CUB	0.00284	0.544464	-0.0451846	Quadrant II
	y2070	PAN	-0.0166	0.321312	0.0709445	Quadrant IV
	y2070	PER	0.0631	0.12297	-0.00763827	Quadrant II
	y2070	COL	-0.00304	0.657283	-0.112327	Quadrant III
	y2070	BHS	-0.0262	0.266575	0.245176	Quadrant IV
	y2070	JAM	-0.00223	0.191808	0.0445303	Quadrant IV
	y2070	CHL	0.0377	0.618413	0.0893409	Quadrant I
	y2070	HTI	0.0553	0.371069	0.0701714	Quadrant I
	y2070	BRA	0.0185	0.459767	0.177241	Quadrant I
	y2070	ARG	0.0931	0.863207	0.295681	Quadrant I
	y2070	VEN	0.153	0.444446	-0.140453	Quadrant II
	y2070	DOM	-0.0183	0.329377	0.0312603	Quadrant IV
	y2070	BOL	0.019	0.841053	0.128272	Quadrant I
	y2070	PRY	0.041	0.573277	0.0827659	Quadrant I
	y2070	TTO	0.0384	0.295228	-0.246136	Quadrant II
	y2070	FLK	1e-06	0.321623	0.251977	Quadrant I
	y2070	GUY	0.0259	0.146758	0.1116	Quadrant I
	y2070	URY	0.207	0.640053	0.199754	Quadrant I
	y2070	SUR	1.51e-06	0.341864	-0.041596	Quadrant II
	y2070	GUF	-0.00014	0.235778	0.0208608	Quadrant IV
	y2070	SGS	1e-06	0.313051	0.232923	Quadrant I
	y2070	MAR	6.34e-05	0.135861	0.163163	Quadrant I
	y2070	TUN	0.00376	0.0706069	0.0390368	Quadrant I
	y2070	SAU	-0.111	0.134782	-0.0929563	Quadrant III
	y2070	ISR	9.99e-07	0.054982	0.287432	Quadrant I
	y2070	JOR	1e-06	0.257688	0.0887579	Quadrant I
	y2070	LBN	1.9e-05	0.108252	0.150228	Quadrant I
	y2070	SYR	-7.22e-05	0.28124	0.272849	Quadrant IV
	y2070	IRQ	0.000489	0.189476	-0.700357	Quadrant II
	y2070	YEM	-0.0411	0.363504	-0.183749	Quadrant III
	y2070	KWT	9.99e-07	0.13913	0.148907	Quadrant I
	y2070	QAT	-2.99e-07	0.299091	0.367153	Quadrant IV
	y2070	OMN	-0.312	0.0733207	0.185628	Quadrant IV
	y2070	ARE	9.81e-07	0.00314771	-0.191399	Quadrant II
	y2070	PAK	0.0123	0.544745	-0.0264228	Quadrant II
	y2070	CAN	-0.00297	0.362414	0.26447	Quadrant IV
	y2070	PRI	-0.00442	0.294802	0.208341	Quadrant IV
	y2070	AUS	-1.25	0.49716	0.341891	Quadrant IV
	y2070	JPN	-0.127	0.0583224	0.0812788	Quadrant IV
	y2070	NZL	-0.000561	0.468294	0.352297	Quadrant IV
	y2070	IDN	0.0767	0.110315	-0.178872	Quadrant II
	y2070	MYS	0.105	0.144687	0.0457168	Quadrant I
	y2070	SGP	0.12	0.308199	0.312643	Quadrant I
	y2070	BRN	0.12	0.140512	-0.062626	Quadrant II
	y2070	PHL	0.0789	0.343301	0.162665	Quadrant I
	y2070	TLS	0.0507	0.526829	0.115263	Quadrant I
	y2070	KOR	0.0601	0.0844996	0.158158	Quadrant I
	y2070	PNG	-0.0118	0.355853	0.205761	Quadrant IV
	y2070	SLB	0.12	0.258887	0.282663	Quadrant I
	y2070	NCL	-0.156	0.173867	0.201675	Quadrant IV
	y2070	VUT	0.12	0.266832	0.329038	Quadrant I
	y2070	FJI	0.0994	0.105321	0.1956	Quadrant I
	y2070	REU	-0.000166	0.258065	0.17533	Quadrant IV
	y2070	LKA	-0.0355	0.0480623	-0.134929	Quadrant III
	y2070	BGD	0.00303	0.100673	-0.0293785	Quadrant II
	y2070	BTN	0.0778	0.271647	0.300945	Quadrant I
	y2080	SEN	-0.06	0.0745933	0.113243	Quadrant IV
	y2080	GMB	-0.814	0.128913	0.115026	Quadrant IV
	y2080	MRT	0.00358	0.393753	0.0561452	Quadrant I
	y2080	ESH	-0.0294	0.214169	-0.244239	Quadrant III
	y2080	GNB	-0.815	0.632378	0.261399	Quadrant IV
	y2080	GIN	-0.376	0.135846	0.305283	Quadrant IV
	y2080	SLE	0.462	0.044621	0.339833	Quadrant I
	y2080	MLI	0.076	0.309258	0.175199	Quadrant I
	y2080	LBR	0.521	0.250365	0.203941	Quadrant I
	y2080	CIV	-0.324	0.211596	0.364049	Quadrant IV
	y2080	BFA	0.0351	0.0936874	0.498207	Quadrant I
	y2080	GHA	-0.227	0.212118	0.339526	Quadrant IV
	y2080	TGO	-0.363	0.114349	0.238298	Quadrant IV
	y2080	NER	-0.088	0.0673202	0.181276	Quadrant IV
	y2080	BEN	-0.233	0.0195291	0.201506	Quadrant IV
	y2080	DZA	0.00927	0.154784	-0.198289	Quadrant II
	y2080	NGA	-0.143	0.0454079	0.17539	Quadrant IV
	y2080	CMR	0.0676	0.0757606	0.325313	Quadrant I
	y2080	GAB	0.00063	0.249342	0.198018	Quadrant I
	y2080	GNQ	0.142	0.28832	0.299614	Quadrant I
	y2080	NAM	-0.0115	0.34396	0.157542	Quadrant IV
	y2080	AGO	0.0361	0.279427	0.118499	Quadrant I
	y2080	COG	0.388	0.24342	0.128428	Quadrant I
	y2080	COD	0.00281	0.244654	0.159738	Quadrant I
	y2080	LBY	9.02e-05	0.2486	0.323215	Quadrant I
	y2080	TCD	0.251	0.0975129	0.137351	Quadrant I
	y2080	CAF	0.232	0.411539	0.374065	Quadrant I
	y2080	ZAF	0.00987	0.481718	0.198356	Quadrant I
	y2080	BWA	0.000399	0.407576	-0.0930916	Quadrant II
	y2080	ZMB	-0.00497	0.143487	0.162148	Quadrant IV
	y2080	SDN	0.0501	0.508039	0.256802	Quadrant I
	y2080	ZWE	-0.0144	0.566123	0.284241	Quadrant IV
	y2080	LSO	0.000215	0.597664	0.284962	Quadrant I
	y2080	BDI	-0.0425	0.228326	0.153682	Quadrant IV
	y2080	RWA	-0.0678	0.260475	0.250015	Quadrant IV
	y2080	TZA	-0.00732	0.117591	0.22719	Quadrant IV
	y2080	UGA	-0.0329	0.252218	0.35662	Quadrant IV
	y2080	MOZ	-0.0302	0.307077	0.226945	Quadrant IV
	y2080	SWZ	0.0122	0.469235	-0.0560728	Quadrant II
	y2080	MWI	0.0411	0.217183	0.250219	Quadrant I
	y2080	ETH	9.59e-05	0.424355	0.158728	Quadrant I
	y2080	EGY	-7.29e-05	0.0345086	0.108153	Quadrant IV
	y2080	KEN	-0.117	0.435155	0.114437	Quadrant IV
	y2080	ERI	-0.0906	0.212247	-0.0749325	Quadrant III
	y2080	SOM	-0.0174	0.229498	-0.51102	Quadrant III
	y2080	DJI	0.000147	0.372664	0.0477028	Quadrant I
	y2080	MDG	0.0135	0.371497	0.141834	Quadrant I
	y2080	MUS	0.000101	0.110144	-0.0151385	Quadrant II
	y2080	ATF	0.000101	0.23416	0.187859	Quadrant I
	y2080	CHN	0.0851	0.184691	0.438978	Quadrant I
	y2080	IND	0.0109	0.0847455	0.0696693	Quadrant I
	y2080	NPL	-0.0502	0.161426	0.0112517	Quadrant IV
	y2080	MNG	-0.00602	0.854195	0.484718	Quadrant IV
	y2080	MMR	-0.0321	0.0600978	0.1177	Quadrant IV
	y2080	LAO	-0.0871	0.179103	0.32042	Quadrant IV
	y2080	THA	0.0136	0.170869	0.100783	Quadrant I
	y2080	KHM	-0.0238	0.303092	0.293614	Quadrant IV
	y2080	VNM	-0.0531	0.270856	0.28011	Quadrant IV
	y2080	RUS	-0.000306	0.366166	0.379776	Quadrant IV
	y2080	PRK	-0.0892	0.0945688	-2.54633	Quadrant III
	y2080	GRL	1.33e-06	0.303509	0.3745	Quadrant I
	y2080	ISL	3.2e-05	0.54309	0.529121	Quadrant I
	y2080	ESP	0.0228	0.2068	0.314284	Quadrant I
	y2080	IRL	0.00197	0.417393	0.435246	Quadrant I
	y2080	PRT	0.0427	0.255831	0.492668	Quadrant I
	y2080	GBR	0.00188	0.459062	0.333442	Quadrant I
	y2080	FRA	-0.526	0.385493	0.388846	Quadrant IV
	y2080	BEL	0.0261	0.502699	0.422247	Quadrant I
	y2080	NLD	0.0113	0.465516	0.322818	Quadrant I
	y2080	NOR	0.0175	0.341524	0.456742	Quadrant I
	y2080	LUX	0.00264	0.261856	0.482078	Quadrant I
	y2080	DEU	-0.0704	0.610335	0.404441	Quadrant IV
	y2080	CHE	0.116	0.739463	0.409456	Quadrant I
	y2080	ITA	-0.13	0.241008	0.328348	Quadrant IV
	y2080	DNK	0.00247	0.375162	0.495509	Quadrant I
	y2080	AUT	-0.299	0.575309	0.446754	Quadrant IV
	y2080	SWE	0.00162	0.419473	0.277853	Quadrant I
	y2080	CZE	-0.0468	0.653159	0.351944	Quadrant IV
	y2080	HRV	-0.589	0.400185	0.288023	Quadrant IV
	y2080	SVN	-0.532	0.379527	0.295197	Quadrant IV
	y2080	SJM	9.64e-07	0.305318	0.373145	Quadrant I
	y2080	POL	0.00249	0.688821	0.333541	Quadrant I
	y2080	BIH	0.143	0.218084	0.428071	Quadrant I
	y2080	HUN	-0.933	0.825751	0.374108	Quadrant IV
	y2080	SVK	-0.315	0.750429	0.274835	Quadrant IV
	y2080	MNE	0.145	0.398857	0.423286	Quadrant I
	y2080	SRB	0.129	0.515721	0.315853	Quadrant I
	y2080	ALB	0.124	0.319256	0.42135	Quadrant I
	y2080	GRC	-0.0213	0.154893	0.315705	Quadrant IV
	y2080	MKD	0.13	0.305948	0.262833	Quadrant I
	y2080	ROU	-0.7	0.414322	0.324374	Quadrant IV
	y2080	LTU	0.00251	0.512972	0.441787	Quadrant I
	y2080	LVA	0.00265	0.441841	0.437977	Quadrant I
	y2080	FIN	0.00183	0.509493	0.376803	Quadrant I
	y2080	EST	0.00228	0.446817	0.440906	Quadrant I
	y2080	BGR	-0.475	0.601	0.257869	Quadrant IV
	y2080	BLR	-0.00143	0.517291	0.427337	Quadrant IV
	y2080	TUR	0.0408	0.0843975	0.141136	Quadrant I
	y2080	MDA	-0.0012	0.49236	0.279099	Quadrant IV
	y2080	CYP	9.97e-07	0.135471	0.136838	Quadrant I
	y2080	IRN	-0.000568	0.0625186	-0.158456	Quadrant III
	y2080	UKR	-0.00117	0.522099	0.38415	Quadrant IV
	y2080	GEO	-0.000951	0.45252	0.136582	Quadrant IV
	y2080	ARM	0.00566	0.506145	0.249514	Quadrant I
	y2080	AZE	0.00934	0.295414	0.0805595	Quadrant I
	y2080	KAZ	0.00564	0.465928	0.268752	Quadrant I
	y2080	TKM	0.00497	0.414127	0.327335	Quadrant I
	y2080	UZB	0.00926	0.3585	0.252886	Quadrant I
	y2080	AFG	0.000258	0.470118	0.0355057	Quadrant I
	y2080	TJK	0.0106	0.509798	0.0692412	Quadrant I
	y2080	KGZ	0.00791	0.57314	0.308387	Quadrant I
	y2080	MEX	0.198	0.452794	0.107788	Quadrant I
	y2080	USA	0.0336	0.489197	0.355931	Quadrant I
	y2080	GTM	0.506	0.413957	-0.189236	Quadrant II
	y2080	ECU	-0.00356	0.647634	0.170226	Quadrant IV
	y2080	SLV	0.253	0.41274	0.00695118	Quadrant I
	y2080	HND	0.281	0.64499	0.0605521	Quadrant I
	y2080	BLZ	0.647	0.291669	0.313707	Quadrant I
	y2080	NIC	0.169	0.488617	0.000470865	Quadrant I
	y2080	CRI	0.393	0.407175	0.0835192	Quadrant I
	y2080	CUB	0.611	0.565455	0.0706005	Quadrant I
	y2080	PAN	0.0972	0.315091	0.152873	Quadrant I
	y2080	PER	0.0724	0.127712	0.0969327	Quadrant I
	y2080	COL	0.0876	0.660296	-0.00496202	Quadrant II
	y2080	BHS	0.645	0.265088	0.31664	Quadrant I
	y2080	JAM	0.564	0.206038	0.155788	Quadrant I
	y2080	CHL	0.0425	0.61973	0.175347	Quadrant I
	y2080	HTI	0.498	0.410103	0.202677	Quadrant I
	y2080	BRA	0.0644	0.464558	0.255909	Quadrant I
	y2080	ARG	0.182	0.852417	0.358434	Quadrant I
	y2080	VEN	0.131	0.449205	-0.0249488	Quadrant II
	y2080	DOM	0.52	0.328437	0.12041	Quadrant I
	y2080	BOL	0.0553	0.858833	0.223236	Quadrant I
	y2080	PRY	0.0566	0.587484	0.176668	Quadrant I
	y2080	TTO	0.0329	0.294427	-0.139424	Quadrant II
	y2080	FLK	1e-06	0.315723	0.313763	Quadrant I
	y2080	GUY	0.0166	0.154677	0.211739	Quadrant I
	y2080	URY	0.283	0.633771	0.27024	Quadrant I
	y2080	SUR	0.000102	0.342518	0.0669022	Quadrant I
	y2080	GUF	-2.95e-05	0.228415	0.0943108	Quadrant IV
	y2080	SGS	1e-06	0.307318	0.297236	Quadrant I
	y2080	MAR	3.03e-05	0.127567	0.192323	Quadrant I
	y2080	TUN	-0.000322	0.0694178	0.0632441	Quadrant IV
	y2080	SAU	-0.0637	0.129307	-0.0908666	Quadrant III
	y2080	ISR	1e-06	0.0535023	0.296487	Quadrant I
	y2080	JOR	1e-06	0.263244	0.120768	Quadrant I
	y2080	LBN	1.82e-05	0.107039	0.170309	Quadrant I
	y2080	SYR	-7.22e-05	0.286922	0.301142	Quadrant IV
	y2080	IRQ	0.000346	0.183687	-0.591064	Quadrant II
	y2080	YEM	-0.0264	0.362204	-0.0701834	Quadrant III
	y2080	KWT	9.97e-07	0.134264	0.148932	Quadrant I
	y2080	QAT	-7.16e-06	0.295243	0.368585	Quadrant IV
	y2080	OMN	-0.175	0.0689907	0.193276	Quadrant IV
	y2080	ARE	1e-06	0.00160625	-0.201985	Quadrant II
	y2080	PAK	0.00266	0.573349	0.0502195	Quadrant I
	y2080	CAN	-0.00167	0.356789	0.269093	Quadrant IV
	y2080	PRI	0.619	0.292608	0.279394	Quadrant I
	y2080	AUS	-1.1	0.488779	0.3462	Quadrant IV
	y2080	JPN	-0.0792	0.05959	0.0839319	Quadrant IV
	y2080	NZL	-0.000314	0.462257	0.357168	Quadrant IV
	y2080	IDN	0.059	0.109641	-0.144747	Quadrant II
	y2080	MYS	0.103	0.146716	0.0576521	Quadrant I
	y2080	SGP	0.116	0.302483	0.320736	Quadrant I
	y2080	BRN	0.116	0.13786	-0.0594832	Quadrant II
	y2080	PHL	0.0693	0.353241	0.200536	Quadrant I
	y2080	TLS	-0.00286	0.559502	0.177872	Quadrant IV
	y2080	KOR	-0.0908	0.0829255	0.165244	Quadrant IV
	y2080	PNG	-0.0109	0.379381	0.253788	Quadrant IV
	y2080	SLB	0.116	0.284044	0.329381	Quadrant I
	y2080	NCL	-0.0418	0.167786	0.208009	Quadrant IV
	y2080	VUT	0.116	0.293735	0.36179	Quadrant I
	y2080	FJI	0.0973	0.117972	0.232268	Quadrant I
	y2080	REU	0.00309	0.25201	0.175888	Quadrant I
	y2080	LKA	-0.0349	0.0557429	-0.093055	Quadrant III
	y2080	BGD	0.00174	0.0966809	0.0425304	Quadrant I
	y2080	BTN	0.0259	0.272847	0.317026	Quadrant I
	y2090	SEN	-0.0663	0.0864667	0.167352	Quadrant IV
	y2090	GMB	-1.24	0.142254	0.167153	Quadrant IV
	y2090	MRT	0.0587	0.400578	0.10864	Quadrant I
	y2090	ESH	1e-06	0.211657	-0.248778	Quadrant II
	y2090	GNB	-1.24	0.660109	0.305706	Quadrant IV
	y2090	GIN	-0.524	0.139674	0.331972	Quadrant IV
	y2090	SLE	0.458	0.0624035	0.385115	Quadrant I
	y2090	MLI	-0.071	0.299706	0.240875	Quadrant IV
	y2090	LBR	0.523	0.257953	0.263073	Quadrant I
	y2090	CIV	-0.348	0.212474	0.383511	Quadrant IV
	y2090	BFA	-0.127	0.0900206	0.528596	Quadrant IV
	y2090	GHA	-0.253	0.214884	0.369873	Quadrant IV
	y2090	TGO	-0.385	0.13932	0.298567	Quadrant IV
	y2090	NER	-0.033	0.100297	0.263298	Quadrant IV
	y2090	BEN	-0.277	0.0268297	0.258915	Quadrant IV
	y2090	DZA	0.000123	0.153429	-0.166643	Quadrant II
	y2090	NGA	-0.0836	0.0523013	0.218529	Quadrant IV
	y2090	CMR	0.0837	0.0862732	0.35688	Quadrant I
	y2090	GAB	0.000683	0.248627	0.214182	Quadrant I
	y2090	GNQ	0.166	0.287666	0.315085	Quadrant I
	y2090	NAM	0.0167	0.334626	0.183506	Quadrant I
	y2090	AGO	0.0554	0.296298	0.185801	Quadrant I
	y2090	COG	0.422	0.246503	0.161885	Quadrant I
	y2090	COD	0.0251	0.269126	0.227682	Quadrant I
	y2090	LBY	7.33e-05	0.246039	0.328723	Quadrant I
	y2090	TCD	0.304	0.118827	0.204221	Quadrant I
	y2090	CAF	0.4	0.416441	0.427197	Quadrant I
	y2090	ZAF	0.0185	0.471942	0.213905	Quadrant I
	y2090	BWA	0.0034	0.399124	-0.074249	Quadrant II
	y2090	ZMB	-0.000208	0.163518	0.213941	Quadrant IV
	y2090	SDN	0.0562	0.537936	0.287617	Quadrant I
	y2090	ZWE	-0.0283	0.614137	0.345689	Quadrant IV
	y2090	LSO	0.000512	0.603372	0.328697	Quadrant I
	y2090	BDI	-0.044	0.254496	0.228405	Quadrant IV
	y2090	RWA	-0.0679	0.273191	0.301067	Quadrant IV
	y2090	TZA	0.0127	0.134266	0.275697	Quadrant I
	y2090	UGA	-0.0264	0.282179	0.398045	Quadrant IV
	y2090	MOZ	-0.0504	0.337087	0.280238	Quadrant IV
	y2090	SWZ	0.0164	0.481166	-0.00765928	Quadrant II
	y2090	MWI	0.0137	0.259986	0.317103	Quadrant I
	y2090	ETH	0.00128	0.453989	0.221273	Quadrant I
	y2090	EGY	0.00053	0.028963	0.121609	Quadrant I
	y2090	KEN	0.0229	0.453177	0.176532	Quadrant I
	y2090	ERI	0.0437	0.201992	0.0682484	Quadrant I
	y2090	SOM	0.00395	0.227938	-0.429966	Quadrant II
	y2090	DJI	0.0546	0.372783	0.0828344	Quadrant I
	y2090	MDG	0.0208	0.385319	0.215877	Quadrant I
	y2090	MUS	0.000101	0.105734	0.00580622	Quadrant I
	y2090	ATF	0.000101	0.229816	0.195883	Quadrant I
	y2090	CHN	0.133	0.187188	0.437642	Quadrant I
	y2090	IND	0.0159	0.0934756	0.0785584	Quadrant I
	y2090	NPL	-0.0558	0.173269	0.0818518	Quadrant IV
	y2090	MNG	-0.0226	0.865723	0.494808	Quadrant IV
	y2090	MMR	-0.162	0.0787078	0.164328	Quadrant IV
	y2090	LAO	-0.0961	0.184186	0.346724	Quadrant IV
	y2090	THA	-0.141	0.177287	0.117157	Quadrant IV
	y2090	KHM	-0.162	0.325245	0.326632	Quadrant IV
	y2090	VNM	-0.0552	0.280103	0.30154	Quadrant IV
	y2090	RUS	0.00227	0.362482	0.370475	Quadrant I
	y2090	PRK	-0.123	0.106407	-2.77901	Quadrant III
	y2090	GRL	1.74e-06	0.297171	0.371003	Quadrant I
	y2090	ISL	6.86e-05	0.537936	0.530732	Quadrant I
	y2090	ESP	0.0458	0.208163	0.315368	Quadrant I
	y2090	IRL	0.00149	0.409014	0.429724	Quadrant I
	y2090	PRT	0.0665	0.252477	0.49181	Quadrant I
	y2090	GBR	0.00169	0.456253	0.330555	Quadrant I
	y2090	FRA	-0.458	0.384138	0.387956	Quadrant IV
	y2090	BEL	0.0388	0.494377	0.418088	Quadrant I
	y2090	NLD	0.0164	0.45885	0.317583	Quadrant I
	y2090	NOR	0.0186	0.336567	0.456761	Quadrant I
	y2090	LUX	0.00254	0.260185	0.476471	Quadrant I
	y2090	DEU	-0.0666	0.605113	0.400737	Quadrant IV
	y2090	CHE	0.13	0.736417	0.409134	Quadrant I
	y2090	ITA	-0.172	0.237438	0.325397	Quadrant IV
	y2090	DNK	0.00238	0.369981	0.493144	Quadrant I
	y2090	AUT	-0.277	0.567667	0.442248	Quadrant IV
	y2090	SWE	0.00128	0.416452	0.274315	Quadrant I
	y2090	CZE	-0.0417	0.650054	0.34721	Quadrant IV
	y2090	HRV	-0.553	0.396741	0.284347	Quadrant IV
	y2090	SVN	-0.562	0.374911	0.291417	Quadrant IV
	y2090	SJM	1.02e-06	0.29961	0.371234	Quadrant I
	y2090	POL	0.00238	0.687041	0.330812	Quadrant I
	y2090	BIH	0.163	0.218191	0.433418	Quadrant I
	y2090	HUN	-0.857	0.819232	0.371547	Quadrant IV
	y2090	SVK	-0.283	0.737772	0.264751	Quadrant IV
	y2090	MNE	0.165	0.404677	0.425825	Quadrant I
	y2090	SRB	0.149	0.519219	0.322209	Quadrant I
	y2090	ALB	0.143	0.321675	0.426407	Quadrant I
	y2090	GRC	-0.0341	0.15468	0.314423	Quadrant IV
	y2090	MKD	0.15	0.304955	0.263817	Quadrant I
	y2090	ROU	-0.674	0.415396	0.326547	Quadrant IV
	y2090	LTU	0.00241	0.513868	0.439264	Quadrant I
	y2090	LVA	0.00254	0.439228	0.437131	Quadrant I
	y2090	FIN	0.00136	0.513813	0.375267	Quadrant I
	y2090	EST	0.00195	0.446074	0.439546	Quadrant I
	y2090	BGR	-0.466	0.595021	0.254888	Quadrant IV
	y2090	BLR	0.000251	0.511671	0.417657	Quadrant I
	y2090	TUR	0.0465	0.0848987	0.140793	Quadrant I
	y2090	MDA	-0.00146	0.493773	0.274696	Quadrant IV
	y2090	CYP	9.97e-07	0.136269	0.135623	Quadrant I
	y2090	IRN	-0.000135	0.0595218	-0.140658	Quadrant III
	y2090	UKR	-0.00137	0.522028	0.377884	Quadrant IV
	y2090	GEO	0.000557	0.449664	0.129203	Quadrant I
	y2090	ARM	0.0274	0.506672	0.243603	Quadrant I
	y2090	AZE	0.0513	0.291235	0.092846	Quadrant I
	y2090	KAZ	0.0195	0.45945	0.254292	Quadrant I
	y2090	TKM	0.0293	0.39686	0.305211	Quadrant I
	y2090	UZB	0.0553	0.355451	0.245329	Quadrant I
	y2090	AFG	-0.00113	0.481702	0.121571	Quadrant IV
	y2090	TJK	0.0552	0.518695	0.0724396	Quadrant I
	y2090	KGZ	0.044	0.581034	0.308587	Quadrant I
	y2090	MEX	0.202	0.455447	0.13837	Quadrant I
	y2090	USA	0.0312	0.483757	0.348441	Quadrant I
	y2090	GTM	0.508	0.432058	-0.128702	Quadrant II
	y2090	ECU	0.00281	0.643366	0.20925	Quadrant I
	y2090	SLV	0.251	0.422537	0.0595295	Quadrant I
	y2090	HND	0.294	0.664745	0.115523	Quadrant I
	y2090	BLZ	0.64	0.29936	0.344562	Quadrant I
	y2090	NIC	0.21	0.502841	0.0566241	Quadrant I
	y2090	CRI	0.397	0.408681	0.116359	Quadrant I
	y2090	CUB	0.606	0.581133	0.106187	Quadrant I
	y2090	PAN	0.112	0.307522	0.171992	Quadrant I
	y2090	PER	0.0748	0.130091	0.122203	Quadrant I
	y2090	COL	0.0923	0.659606	0.0290156	Quadrant I
	y2090	BHS	0.639	0.262291	0.33446	Quadrant I
	y2090	JAM	0.555	0.216929	0.193341	Quadrant I
	y2090	CHL	0.0499	0.617741	0.196912	Quadrant I
	y2090	HTI	0.501	0.434192	0.251618	Quadrant I
	y2090	BRA	0.0964	0.466909	0.28309	Quadrant I
	y2090	ARG	0.243	0.83767	0.384008	Quadrant I
	y2090	VEN	0.00308	0.450934	0.00558102	Quadrant I
	y2090	DOM	0.52	0.32613	0.139207	Quadrant I
	y2090	BOL	0.0721	0.863874	0.256796	Quadrant I
	y2090	PRY	0.0639	0.595466	0.204541	Quadrant I
	y2090	TTO	0.000408	0.292118	-0.119375	Quadrant II
	y2090	FLK	1e-06	0.309875	0.327865	Quadrant I
	y2090	GUY	0.00472	0.164246	0.244312	Quadrant I
	y2090	URY	0.329	0.62436	0.29831	Quadrant I
	y2090	SUR	0.0001	0.341349	0.0909364	Quadrant I
	y2090	GUF	-3.61e-05	0.222134	0.102846	Quadrant IV
	y2090	SGS	1e-06	0.301636	0.31164	Quadrant I
	y2090	MAR	6.59e-05	0.123349	0.204359	Quadrant I
	y2090	TUN	-0.000458	0.0673075	0.0696505	Quadrant IV
	y2090	SAU	-0.00551	0.123907	-0.0953236	Quadrant III
	y2090	ISR	1e-06	0.0515091	0.299178	Quadrant I
	y2090	JOR	9.99e-07	0.266103	0.136504	Quadrant I
	y2090	LBN	1.83e-05	0.104078	0.173758	Quadrant I
	y2090	SYR	-5.49e-05	0.289518	0.314403	Quadrant IV
	y2090	IRQ	0.000469	0.180444	-0.484129	Quadrant II
	y2090	YEM	-0.00297	0.363434	-0.00238916	Quadrant III
	y2090	KWT	1e-06	0.129776	0.143213	Quadrant I
	y2090	QAT	-7.99e-06	0.291159	0.361588	Quadrant IV
	y2090	OMN	-0.0157	0.0638257	0.187081	Quadrant IV
	y2090	ARE	1.01e-06	0.00678445	-0.216104	Quadrant II
	y2090	PAK	-0.0135	0.595463	0.096512	Quadrant IV
	y2090	CAN	-0.000157	0.350865	0.277847	Quadrant IV
	y2090	PRI	0.612	0.289988	0.297917	Quadrant I
	y2090	AUS	-1.11	0.479869	0.356258	Quadrant IV
	y2090	JPN	-0.049	0.0604815	0.0971779	Quadrant IV
	y2090	NZL	0.00396	0.454303	0.366432	Quadrant I
	y2090	IDN	0.0581	0.108324	-0.114507	Quadrant II
	y2090	MYS	0.1	0.148085	0.0683474	Quadrant I
	y2090	SGP	0.113	0.296895	0.32184	Quadrant I
	y2090	BRN	0.113	0.134833	-0.0609756	Quadrant II
	y2090	PHL	0.0195	0.369215	0.230047	Quadrant I
	y2090	TLS	-0.00285	0.583605	0.215695	Quadrant IV
	y2090	KOR	-0.125	0.0809292	0.168772	Quadrant IV
	y2090	PNG	-0.00928	0.393661	0.283808	Quadrant IV
	y2090	SLB	0.113	0.299068	0.361312	Quadrant I
	y2090	NCL	-0.123	0.161888	0.210217	Quadrant IV
	y2090	VUT	0.113	0.310992	0.383502	Quadrant I
	y2090	FJI	0.0949	0.126686	0.259723	Quadrant I
	y2090	REU	0.00694	0.246291	0.178479	Quadrant I
	y2090	LKA	-0.0334	0.0609399	-0.0586015	Quadrant III
	y2090	BGD	-0.0127	0.0935392	0.0949332	Quadrant IV
	y2090	BTN	0.0134	0.271819	0.327554	Quadrant I
	y2100	SEN	-0.0903	0.0929371	0.209932	Quadrant IV
	y2100	GMB	-1.46	0.151147	0.206666	Quadrant IV
	y2100	MRT	0.0903	0.403129	0.151956	Quadrant I
	y2100	ESH	1e-06	0.209155	-0.236118	Quadrant II
	y2100	GNB	-1.45	0.679656	0.33708	Quadrant IV
	y2100	GIN	-0.557	0.139371	0.355859	Quadrant IV
	y2100	SLE	0.455	0.0746489	0.41774	Quadrant I
	y2100	MLI	-0.0245	0.303854	0.289683	Quadrant IV
	y2100	LBR	0.518	0.277403	0.302367	Quadrant I
	y2100	CIV	-0.35	0.209966	0.402236	Quadrant IV
	y2100	BFA	-0.0857	0.0920488	0.552228	Quadrant IV
	y2100	GHA	-0.256	0.216344	0.393609	Quadrant IV
	y2100	TGO	-0.387	0.15645	0.34037	Quadrant IV
	y2100	NER	-0.0788	0.126297	0.320316	Quadrant IV
	y2100	BEN	-0.284	0.0341051	0.300967	Quadrant IV
	y2100	DZA	0.0029	0.15175	-0.125642	Quadrant II
	y2100	NGA	-0.132	0.0554585	0.251791	Quadrant IV
	y2100	CMR	0.107	0.0932014	0.383185	Quadrant I
	y2100	GAB	0.000712	0.246479	0.231411	Quadrant I
	y2100	GNQ	0.187	0.285752	0.329219	Quadrant I
	y2100	NAM	0.0833	0.322986	0.212457	Quadrant I
	y2100	AGO	0.105	0.31704	0.234618	Quadrant I
	y2100	COG	0.449	0.245978	0.190845	Quadrant I
	y2100	COD	0.0809	0.285271	0.274002	Quadrant I
	y2100	LBY	0.000311	0.243209	0.342054	Quadrant I
	y2100	TCD	0.291	0.138705	0.257896	Quadrant I
	y2100	CAF	0.352	0.422608	0.467702	Quadrant I
	y2100	ZAF	0.0207	0.461908	0.230665	Quadrant I
	y2100	BWA	0.00371	0.388498	-0.0491688	Quadrant II
	y2100	ZMB	0.0103	0.173758	0.255941	Quadrant I
	y2100	SDN	0.057	0.554611	0.323715	Quadrant I
	y2100	ZWE	-0.0312	0.641355	0.389725	Quadrant IV
	y2100	LSO	0.000502	0.599333	0.363703	Quadrant I
	y2100	BDI	-0.025	0.272074	0.278175	Quadrant IV
	y2100	RWA	-0.0378	0.27996	0.340639	Quadrant IV
	y2100	TZA	0.00892	0.144794	0.31508	Quadrant I
	y2100	UGA	-0.015	0.301344	0.428603	Quadrant IV
	y2100	MOZ	-0.051	0.358254	0.317244	Quadrant IV
	y2100	SWZ	0.0176	0.485621	0.0396579	Quadrant I
	y2100	MWI	0.0356	0.290798	0.36309	Quadrant I
	y2100	ETH	0.000968	0.470886	0.269682	Quadrant I
	y2100	EGY	0.00335	0.0275616	0.138612	Quadrant I
	y2100	KEN	0.014	0.463618	0.224435	Quadrant I
	y2100	ERI	0.0438	0.212424	0.166529	Quadrant I
	y2100	SOM	0.0026	0.220463	-0.300383	Quadrant II
	y2100	DJI	0.0538	0.367828	0.123249	Quadrant I
	y2100	MDG	0.0147	0.392467	0.268713	Quadrant I
	y2100	MUS	0.000101	0.101697	0.0259617	Quadrant I
	y2100	ATF	0.000101	0.225503	0.198706	Quadrant I
	y2100	CHN	0.0843	0.189322	0.452318	Quadrant I
	y2100	IND	0.016	0.100275	0.0705295	Quadrant I
	y2100	NPL	-0.0413	0.182393	0.131598	Quadrant IV
	y2100	MNG	-0.0167	0.874062	0.505184	Quadrant IV
	y2100	MMR	-0.0674	0.0952225	0.197952	Quadrant IV
	y2100	LAO	-0.081	0.186312	0.367846	Quadrant IV
	y2100	THA	-0.0546	0.18151	0.125341	Quadrant IV
	y2100	KHM	-0.068	0.340503	0.348651	Quadrant IV
	y2100	VNM	-0.0455	0.288055	0.315131	Quadrant IV
	y2100	RUS	2.84e-05	0.358678	0.446838	Quadrant I
	y2100	PRK	-0.00475	0.11768	-3.0974	Quadrant III
	y2100	GRL	1.83e-06	0.290876	0.380213	Quadrant I
	y2100	ISL	7.18e-05	0.532086	0.54269	Quadrant I
	y2100	ESP	0.049	0.208906	0.340736	Quadrant I
	y2100	IRL	0.000989	0.400902	0.448773	Quadrant I
	y2100	PRT	0.0667	0.24809	0.510984	Quadrant I
	y2100	GBR	0.000904	0.452772	0.354889	Quadrant I
	y2100	FRA	-0.395	0.382313	0.410412	Quadrant IV
	y2100	BEL	0.0385	0.485668	0.439575	Quadrant I
	y2100	NLD	0.0163	0.451808	0.340921	Quadrant I
	y2100	NOR	0.0175	0.331096	0.468773	Quadrant I
	y2100	LUX	0.00306	0.254484	0.49202	Quadrant I
	y2100	DEU	-0.0575	0.599226	0.421995	Quadrant IV
	y2100	CHE	0.127	0.73274	0.417566	Quadrant I
	y2100	ITA	-0.164	0.233295	0.350891	Quadrant IV
	y2100	DNK	0.000333	0.363982	0.510788	Quadrant I
	y2100	AUT	-0.236	0.559174	0.4623	Quadrant IV
	y2100	SWE	0.000978	0.412922	0.30183	Quadrant I
	y2100	CZE	-0.0367	0.645504	0.369776	Quadrant IV
	y2100	HRV	-0.477	0.392427	0.312437	Quadrant IV
	y2100	SVN	-0.487	0.369998	0.319348	Quadrant IV
	y2100	SJM	1.02e-06	0.29395	0.38255	Quadrant I
	y2100	POL	0.000697	0.684096	0.35618	Quadrant I
	y2100	BIH	0.16	0.216955	0.449285	Quadrant I
	y2100	HUN	-0.768	0.807774	0.395049	Quadrant IV
	y2100	SVK	-0.244	0.72311	0.292745	Quadrant IV
	y2100	MNE	0.163	0.408921	0.433313	Quadrant I
	y2100	SRB	0.147	0.521368	0.340381	Quadrant I
	y2100	ALB	0.14	0.322202	0.439827	Quadrant I
	y2100	GRC	-0.034	0.153625	0.341233	Quadrant IV
	y2100	MKD	0.147	0.302165	0.275075	Quadrant I
	y2100	ROU	-0.603	0.415112	0.355312	Quadrant IV
	y2100	LTU	0.000861	0.513151	0.460142	Quadrant I
	y2100	LVA	0.00353	0.435367	0.458896	Quadrant I
	y2100	FIN	0.000912	0.517625	0.397774	Quadrant I
	y2100	EST	0.00215	0.444659	0.460225	Quadrant I
	y2100	BGR	-0.414	0.587106	0.282686	Quadrant IV
	y2100	BLR	0.000187	0.504761	0.487551	Quadrant I
	y2100	TUR	0.0443	0.0848222	0.148192	Quadrant I
	y2100	MDA	-0.00144	0.493145	0.365395	Quadrant IV
	y2100	CYP	0.00391	0.13597	0.170765	Quadrant I
	y2100	IRN	2.18e-06	0.0571295	-0.113195	Quadrant II
	y2100	UKR	-0.00136	0.519422	0.454876	Quadrant IV
	y2100	GEO	0.000493	0.445067	0.240248	Quadrant I
	y2100	ARM	-0.00888	0.505418	0.341353	Quadrant IV
	y2100	AZE	-0.0206	0.287606	0.220276	Quadrant IV
	y2100	KAZ	-0.00292	0.453246	0.343154	Quadrant IV
	y2100	TKM	0.00248	0.378964	0.387913	Quadrant I
	y2100	UZB	-0.0185	0.349497	0.344055	Quadrant IV
	y2100	AFG	-7.24e-05	0.509713	0.182067	Quadrant IV
	y2100	TJK	-0.0193	0.520774	0.20155	Quadrant IV
	y2100	KGZ	-0.018	0.583601	0.399575	Quadrant IV
	y2100	MEX	0.205	0.455762	0.148326	Quadrant I
	y2100	USA	0.0259	0.478377	0.356564	Quadrant I
	y2100	GTM	0.509	0.44492	-0.0991992	Quadrant II
	y2100	ECU	0.0344	0.634956	0.216217	Quadrant I
	y2100	SLV	0.254	0.427212	0.0760972	Quadrant I
	y2100	HND	0.302	0.676482	0.130334	Quadrant I
	y2100	BLZ	0.635	0.302433	0.356221	Quadrant I
	y2100	NIC	0.23	0.509824	0.073497	Quadrant I
	y2100	CRI	0.396	0.408137	0.124449	Quadrant I
	y2100	CUB	0.602	0.591398	0.124594	Quadrant I
	y2100	PAN	0.118	0.299122	0.177846	Quadrant I
	y2100	PER	0.0823	0.131072	0.143718	Quadrant I
	y2100	COL	0.0968	0.655903	0.0381579	Quadrant I
	y2100	BHS	0.633	0.258113	0.33946	Quadrant I
	y2100	JAM	0.544	0.22444	0.213833	Quadrant I
	y2100	CHL	0.0582	0.613437	0.20327	Quadrant I
	y2100	HTI	0.505	0.446208	0.278882	Quadrant I
	y2100	BRA	0.122	0.466804	0.288341	Quadrant I
	y2100	ARG	0.241	0.820618	0.378968	Quadrant I
	y2100	VEN	-0.175	0.450685	0.0246915	Quadrant IV
	y2100	DOM	0.52	0.322621	0.154048	Quadrant I
	y2100	BOL	0.0732	0.859864	0.261812	Quadrant I
	y2100	PRY	0.0526	0.598205	0.218853	Quadrant I
	y2100	TTO	-0.0398	0.289036	-0.106676	Quadrant III
	y2100	FLK	0.143	0.304074	0.331702	Quadrant I
	y2100	GUY	-0.0228	0.172492	0.263624	Quadrant IV
	y2100	URY	0.323	0.612848	0.294891	Quadrant I
	y2100	SUR	0.00281	0.339034	0.113957	Quadrant I
	y2100	GUF	0.00251	0.216803	0.10336	Quadrant I
	y2100	SGS	1e-06	0.296002	0.315693	Quadrant I
	y2100	MAR	3.64e-05	0.120219	0.223844	Quadrant I
	y2100	TUN	0.00182	0.0647464	0.0927883	Quadrant I
	y2100	SAU	0.000396	0.118549	-0.0898493	Quadrant II
	y2100	ISR	1e-06	0.0492879	0.309686	Quadrant I
	y2100	JOR	1e-06	0.266916	0.158545	Quadrant I
	y2100	LBN	1.88e-05	0.0998078	0.191359	Quadrant I
	y2100	SYR	-5.77e-05	0.289901	0.334472	Quadrant IV
	y2100	IRQ	0.00035	0.178708	-0.415534	Quadrant II
	y2100	YEM	-0.001	0.372273	0.0591199	Quadrant IV
	y2100	KWT	9.97e-07	0.125379	0.145053	Quadrant I
	y2100	QAT	3.54e-06	0.286703	0.361617	Quadrant I
	y2100	OMN	1.01e-06	0.0581108	0.190649	Quadrant I
	y2100	ARE	1.01e-06	0.0101414	-0.220211	Quadrant II
	y2100	PAK	-0.00475	0.60982	0.130622	Quadrant IV
	y2100	CAN	-0.000735	0.344523	0.298136	Quadrant IV
	y2100	PRI	0.605	0.287068	0.30614	Quadrant I
	y2100	AUS	-0.998	0.470545	0.37391	Quadrant IV
	y2100	JPN	-0.041	0.0612725	0.134344	Quadrant IV
	y2100	NZL	0.00382	0.444918	0.384935	Quadrant I
	y2100	IDN	0.0667	0.106532	-0.0911763	Quadrant II
	y2100	MYS	0.113	0.148886	0.0718046	Quadrant I
	y2100	SGP	0.128	0.291328	0.320624	Quadrant I
	y2100	BRN	0.128	0.13142	-0.0635885	Quadrant II
	y2100	PHL	0.0572	0.380675	0.251481	Quadrant I
	y2100	TLS	-0.00377	0.601067	0.244711	Quadrant IV
	y2100	KOR	-0.0044	0.0781858	0.170524	Quadrant IV
	y2100	PNG	0.00257	0.401458	0.303915	Quadrant I
	y2100	SLB	0.128	0.308196	0.382622	Quadrant I
	y2100	NCL	-0.0394	0.15626	0.21273	Quadrant IV
	y2100	VUT	0.128	0.323159	0.398032	Quadrant I
	y2100	FJI	0.108	0.132167	0.281142	Quadrant I
	y2100	REU	0.00637	0.240938	0.182631	Quadrant I
	y2100	LKA	-0.0292	0.0647502	-0.0383087	Quadrant III
	y2100	BGD	-0.00485	0.090729	0.131489	Quadrant IV
	y2100	BTN	0.0618	0.269409	0.33273	Quadrant I

## Sheet: VEG
	VEG
	Year	Region	Water	AHEI	Cost	Quadrant-type
	y2030	SEN	-0.000177126	0.0954144	0.0793436	Quadrant I
	y2030	GMB	0.000380469	0.174514	0.0191928	Quadrant II
	y2030	MRT	-0.00648409	0.322424	0.192495	Quadrant IV
	y2030	ESH	0.030303	0.146795	0.204416	Quadrant I
	y2030	GNB	0.000380475	0.192	0.0500376	Quadrant II
	y2030	GIN	0.000333771	0.125692	0.206702	Quadrant I
	y2030	SLE	0.000233523	0.0931211	0.110056	Quadrant I
	y2030	MLI	-4.37757e-05	0.236004	0.175015	Quadrant I
	y2030	LBR	0.000228727	0.174427	-0.21551	Quadrant II
	y2030	CIV	0.000240596	0.156474	0.401891	Quadrant I
	y2030	BFA	0.000334315	0.0956018	0.420255	Quadrant I
	y2030	GHA	0.000250513	0.174277	0.356542	Quadrant I
	y2030	TGO	0.000208382	0.133575	0.0512278	Quadrant II
	y2030	NER	0.123573	0.0440734	0.161162	Quadrant I
	y2030	BEN	-0.0422726	0.035542	0.204181	Quadrant I
	y2030	DZA	0.00382238	0.095591	0.0440656	Quadrant III
	y2030	NGA	0.0957882	0.115752	0.168999	Quadrant I
	y2030	CMR	0.000201849	0.0277399	0.316709	Quadrant I
	y2030	GAB	0.000295676	0.17966	0.453523	Quadrant I
	y2030	GNQ	0.000314657	0.229242	0.513356	Quadrant I
	y2030	NAM	0.0157219	0.148427	0.29499	Quadrant I
	y2030	AGO	0.012794	0.185549	0.089216	Quadrant IV
	y2030	COG	0.000278269	0.176235	-0.0870953	Quadrant II
	y2030	COD	0.0023556	0.191404	-0.405543	Quadrant III
	y2030	LBY	0.0100273	0.158972	0.560971	Quadrant I
	y2030	TCD	0.000125963	0.115404	-0.3652	Quadrant II
	y2030	CAF	0.00113131	0.184679	0.185747	Quadrant IV
	y2030	ZAF	0.125469	0.32461	0.440234	Quadrant I
	y2030	BWA	-0.0197793	0.188272	0.27109	Quadrant I
	y2030	ZMB	0.00109008	0.0772849	-0.259348	Quadrant II
	y2030	SDN	0.00669485	0.238724	0.24316	Quadrant I
	y2030	ZWE	0.0568988	0.345067	0.0521378	Quadrant IV
	y2030	LSO	0.00119315	0.325623	-0.0316609	Quadrant II
	y2030	BDI	0.0553663	0.257047	-0.591273	Quadrant III
	y2030	RWA	0.130116	0.0916109	0.203293	Quadrant IV
	y2030	TZA	0.0206763	0.047335	0.152425	Quadrant I
	y2030	UGA	0.114455	0.0857187	0.237113	Quadrant IV
	y2030	MOZ	0.0528589	0.151438	-0.0251564	Quadrant II
	y2030	SWZ	0.0415163	0.274155	0.15432	Quadrant IV
	y2030	MWI	0.072027	0.0975682	-0.141951	Quadrant III
	y2030	ETH	0.00136616	0.214772	-0.0828536	Quadrant III
	y2030	EGY	0.0160849	0.100123	0.299514	Quadrant I
	y2030	KEN	0.0201741	0.210628	0.10422	Quadrant I
	y2030	ERI	-0.000165894	0.204435	0.121823	Quadrant I
	y2030	SOM	0.000200706	0.184779	0.330859	Quadrant I
	y2030	DJI	-0.00885884	0.230217	0.278194	Quadrant IV
	y2030	MDG	0.0598922	0.220567	-0.132597	Quadrant III
	y2030	MUS	1.01e-08	0.131119	0.382825	Quadrant I
	y2030	ATF	1.01e-08	0.182596	0.4799	Quadrant I
	y2030	CHN	0.0698308	0.106772	0.279424	Quadrant I
	y2030	IND	0.014967	0.140964	0.0596133	Quadrant I
	y2030	NPL	-0.202084	0.0954297	-0.0965706	Quadrant III
	y2030	MNG	0.0181207	0.298964	0.59074	Quadrant I
	y2030	MMR	0.0168492	0.140375	0.21951	Quadrant IV
	y2030	LAO	-0.207306	0.20811	0.341576	Quadrant IV
	y2030	THA	0.031763	0.19382	0.309707	Quadrant I
	y2030	KHM	0.0248524	0.275391	0.24274	Quadrant IV
	y2030	VNM	-0.210732	0.186408	0.430992	Quadrant IV
	y2030	RUS	0.00239735	0.206473	0.336373	Quadrant IV
	y2030	PRK	-0.117354	0.0631705	-0.465881	Quadrant III
	y2030	GRL	3.22906e-06	0.206421	0.470732	Quadrant I
	y2030	ISL	0.000278599	0.334598	0.577699	Quadrant I
	y2030	ESP	0.00234653	0.150481	0.256925	Quadrant I
	y2030	IRL	0.000219114	0.233926	0.4102	Quadrant IV
	y2030	PRT	2.49988e-06	0.182919	0.440541	Quadrant I
	y2030	GBR	0.00146676	0.237855	0.266286	Quadrant I
	y2030	FRA	0.0967422	0.205892	0.320858	Quadrant I
	y2030	BEL	0.00195004	0.250377	0.365159	Quadrant I
	y2030	NLD	0.0017224	0.240111	0.267076	Quadrant I
	y2030	NOR	0.00032189	0.258652	0.520806	Quadrant I
	y2030	LUX	0.00241426	0.1381	0.455805	Quadrant I
	y2030	DEU	0.0146997	0.301171	0.349225	Quadrant I
	y2030	CHE	0.000943335	0.345993	0.4705	Quadrant I
	y2030	ITA	0.00883242	0.136571	0.260165	Quadrant I
	y2030	DNK	0.00241426	0.26702	0.447508	Quadrant I
	y2030	AUT	0.0556353	0.319033	0.402577	Quadrant I
	y2030	SWE	0.000400985	0.214173	0.204486	Quadrant I
	y2030	CZE	0.0113233	0.312779	0.281178	Quadrant I
	y2030	HRV	0.130886	0.188	0.206023	Quadrant I
	y2030	SVN	0.137841	0.231448	0.22448	Quadrant I
	y2030	SJM	-6.29143e-08	0.198872	0.467296	Quadrant IV
	y2030	POL	0.00238125	0.335198	0.259091	Quadrant I
	y2030	BIH	0.00135072	0.152487	0.409638	Quadrant I
	y2030	HUN	0.142111	0.422129	0.308187	Quadrant I
	y2030	SVK	0.0573873	0.37163	0.20402	Quadrant I
	y2030	MNE	0.00136542	0.226223	0.437252	Quadrant I
	y2030	SRB	0.00136161	0.313443	0.364924	Quadrant I
	y2030	ALB	0.00105841	0.160094	0.425972	Quadrant I
	y2030	GRC	2.97121e-06	0.0993603	0.222263	Quadrant I
	y2030	MKD	0.00129222	0.186896	0.255631	Quadrant I
	y2030	ROU	0.104272	0.225399	0.226866	Quadrant I
	y2030	LTU	0.00241426	0.339183	0.37712	Quadrant I
	y2030	LVA	0.00235604	0.254684	0.368363	Quadrant I
	y2030	FIN	7.62484e-05	0.25599	0.30068	Quadrant IV
	y2030	EST	0.00125642	0.243568	0.367225	Quadrant I
	y2030	BGR	0.0720113	0.282347	0.147775	Quadrant II
	y2030	BLR	0.0102681	0.260403	0.379507	Quadrant IV
	y2030	TUR	0.00017874	0.084226	0.172889	Quadrant I
	y2030	MDA	0.0123468	0.218456	0.188676	Quadrant IV
	y2030	CYP	5.69247e-09	0.0901604	0.0437725	Quadrant II
	y2030	IRN	-0.000506056	0.0733258	0.149287	Quadrant IV
	y2030	UKR	0.0123004	0.289264	0.259763	Quadrant IV
	y2030	GEO	0.00816215	0.225893	0.0252595	Quadrant III
	y2030	ARM	0.00109516	0.226729	0.19182	Quadrant I
	y2030	AZE	0.00187337	0.199559	-0.0438938	Quadrant III
	y2030	KAZ	0.00100715	0.234244	0.280503	Quadrant I
	y2030	TKM	0.000862208	0.235157	0.315478	Quadrant IV
	y2030	UZB	0.00152832	0.160227	0.120088	Quadrant III
	y2030	AFG	-0.00959636	0.295599	-0.683717	Quadrant III
	y2030	TJK	0.00231725	0.190887	-0.540993	Quadrant II
	y2030	KGZ	0.00148547	0.173246	0.024931	Quadrant II
	y2030	MEX	0.27404	0.225564	0.176442	Quadrant I
	y2030	USA	0.0649361	0.254194	0.298345	Quadrant I
	y2030	GTM	0.338928	0.199952	-0.303753	Quadrant II
	y2030	ECU	-0.00288678	0.320192	0.142123	Quadrant IV
	y2030	SLV	0.178331	0.164598	-0.0907276	Quadrant III
	y2030	HND	0.220545	0.217021	-0.167459	Quadrant II
	y2030	BLZ	0.800836	0.15457	0.266808	Quadrant I
	y2030	NIC	0.120398	0.177777	-0.241527	Quadrant II
	y2030	CRI	0.171589	0.211557	0.181823	Quadrant I
	y2030	CUB	0.129036	0.247755	0.133753	Quadrant IV
	y2030	PAN	0.0335549	0.176329	0.255257	Quadrant I
	y2030	PER	0.0139776	0.118572	0.119526	Quadrant III
	y2030	COL	0.0402705	0.299238	0.0769157	Quadrant II
	y2030	BHS	0.940286	0.161626	0.432675	Quadrant I
	y2030	JAM	0.234235	0.12497	0.151612	Quadrant I
	y2030	CHL	0.0636356	0.284111	0.274188	Quadrant IV
	y2030	HTI	0.0781833	0.104206	-0.343917	Quadrant III
	y2030	BRA	0.00784717	0.20222	0.338668	Quadrant I
	y2030	ARG	0.0398198	0.371058	0.405603	Quadrant I
	y2030	VEN	0.0106762	0.197809	-0.0121732	Quadrant II
	y2030	DOM	0.257642	0.14489	0.253016	Quadrant I
	y2030	BOL	0.0421049	0.347832	0.121489	Quadrant II
	y2030	PRY	0.00415769	0.268601	0.217175	Quadrant I
	y2030	TTO	7.22944e-05	0.172964	0.0779158	Quadrant II
	y2030	FLK	1e-10	0.205159	0.472478	Quadrant I
	y2030	GUY	0.00917784	0.199458	0.3274	Quadrant I
	y2030	URY	0.000723774	0.297104	0.341752	Quadrant I
	y2030	SUR	0.000435656	0.226138	0.0366171	Quadrant II
	y2030	GUF	0.00295357	0.203317	0.352079	Quadrant I
	y2030	SGS	1e-10	0.202997	0.455409	Quadrant I
	y2030	MAR	3.78472e-05	0.117409	0.276145	Quadrant I
	y2030	TUN	0.118297	0.0756539	0.222681	Quadrant I
	y2030	SAU	0.00349846	0.0966346	0.35331	Quadrant I
	y2030	ISR	4.0024e-10	0.104796	0.531154	Quadrant IV
	y2030	JOR	4.96514e-09	0.138912	0.239364	Quadrant I
	y2030	LBN	-1.12595e-10	0.0753807	0.291192	Quadrant I
	y2030	SYR	3.01194e-11	0.148299	0.325214	Quadrant IV
	y2030	IRQ	4.4777e-05	0.134374	-0.163586	Quadrant II
	y2030	YEM	-0.000906362	0.270281	-0.991528	Quadrant II
	y2030	KWT	1.11931e-09	0.18261	0.489071	Quadrant I
	y2030	QAT	-4.66022e-06	0.281921	0.62592	Quadrant I
	y2030	OMN	0.010885	0.0928109	0.473993	Quadrant I
	y2030	ARE	1.15726e-09	0.0880345	0.330856	Quadrant IV
	y2030	PAK	-0.00705911	0.264149	0.0106392	Quadrant II
	y2030	CAN	0.00211748	0.204824	0.388876	Quadrant I
	y2030	PRI	0.314118	0.176544	0.417452	Quadrant I
	y2030	AUS	0.00162035	0.239148	0.447595	Quadrant I
	y2030	JPN	-0.00713358	0.169817	0.219291	Quadrant IV
	y2030	NZL	0.00138155	0.264118	0.455159	Quadrant I
	y2030	IDN	-0.00449665	0.186315	0.0596586	Quadrant III
	y2030	MYS	0.00040449	0.18925	0.363128	Quadrant I
	y2030	SGP	0.000474174	0.190744	0.562147	Quadrant I
	y2030	BRN	0.000474164	0.0968977	0.343995	Quadrant I
	y2030	PHL	0.0036013	0.25472	0.337739	Quadrant I
	y2030	TLS	-1.01409e-09	0.293293	-0.271265	Quadrant II
	y2030	KOR	-0.103265	0.131974	0.446671	Quadrant IV
	y2030	PNG	-0.0999717	0.204799	-0.00213604	Quadrant III
	y2030	SLB	0.00047418	0.101656	0.115912	Quadrant II
	y2030	NCL	-0.0161162	0.159716	0.493516	Quadrant IV
	y2030	VUT	0.000474165	0.0721242	0.281867	Quadrant I
	y2030	FJI	0.00374784	0.0938326	0.361676	Quadrant I
	y2030	REU	0.00136938	0.179162	0.577034	Quadrant I
	y2030	LKA	-0.187797	0.101752	-0.00814341	Quadrant III
	y2030	BGD	-0.18365	0.222836	-0.00285879	Quadrant III
	y2030	BTN	-0.0345977	0.20414	0.439058	Quadrant IV
	y2040	SEN	0.000259846	0.0870253	0.329311	Quadrant IV
	y2040	GMB	0.000921196	0.195063	0.306096	Quadrant I
	y2040	MRT	-0.0051255	0.455712	0.4293	Quadrant IV
	y2040	ESH	1e-10	0.266116	0.371709	Quadrant I
	y2040	GNB	0.000921192	0.282273	0.376194	Quadrant I
	y2040	GIN	0.000826548	0.202083	0.536202	Quadrant I
	y2040	SLE	0.000649832	0.128159	0.361889	Quadrant I
	y2040	MLI	0.000438018	0.381935	0.413814	Quadrant IV
	y2040	LBR	0.000706094	0.254676	0.186054	Quadrant II
	y2040	CIV	0.000666817	0.201131	0.587477	Quadrant I
	y2040	BFA	0.000816947	0.149254	0.585785	Quadrant I
	y2040	GHA	0.000679711	0.178409	0.52214	Quadrant I
	y2040	TGO	0.000609742	0.0940447	0.30582	Quadrant I
	y2040	NER	0.0209549	0.0813931	0.374987	Quadrant I
	y2040	BEN	-0.091172	0.0426281	0.370482	Quadrant IV
	y2040	DZA	0.00239183	0.188509	0.274339	Quadrant I
	y2040	NGA	0.083212	0.103819	0.356874	Quadrant I
	y2040	CMR	0.000631805	0.064788	0.512401	Quadrant I
	y2040	GAB	0.00094949	0.236544	0.544592	Quadrant I
	y2040	GNQ	0.00120622	0.368417	0.61499	Quadrant I
	y2040	NAM	0.0252407	0.374616	0.489522	Quadrant I
	y2040	AGO	0.0244883	0.259012	0.14648	Quadrant I
	y2040	COG	0.000870098	0.26855	0.336676	Quadrant II
	y2040	COD	0.0173172	0.201373	0.0965852	Quadrant II
	y2040	LBY	0.00171099	0.286099	0.654716	Quadrant I
	y2040	TCD	0.000612027	0.179591	0.185326	Quadrant II
	y2040	CAF	0.00180337	0.298231	0.483113	Quadrant I
	y2040	ZAF	0.117338	0.533826	0.563305	Quadrant I
	y2040	BWA	-0.0172472	0.338033	0.437782	Quadrant IV
	y2040	ZMB	-0.0296664	0.163969	0.229245	Quadrant II
	y2040	SDN	0.0465487	0.383153	0.477035	Quadrant I
	y2040	ZWE	0.0888895	0.543545	0.345023	Quadrant I
	y2040	LSO	0.00309667	0.591572	0.395293	Quadrant II
	y2040	BDI	0.0494162	0.226619	0.0247787	Quadrant II
	y2040	RWA	0.0960436	0.14477	0.427278	Quadrant I
	y2040	TZA	0.0490548	0.0866408	0.39753	Quadrant I
	y2040	UGA	0.083279	0.0647077	0.459689	Quadrant I
	y2040	MOZ	0.0866159	0.188148	0.297136	Quadrant II
	y2040	SWZ	0.050019	0.405335	0.348095	Quadrant I
	y2040	MWI	0.223598	0.167247	0.237935	Quadrant II
	y2040	ETH	-0.0360968	0.354429	0.318341	Quadrant II
	y2040	EGY	0.00286101	0.154539	0.489334	Quadrant I
	y2040	KEN	-0.023026	0.36036	0.385742	Quadrant I
	y2040	ERI	0.00120672	0.311706	0.214317	Quadrant IV
	y2040	SOM	0.00118023	0.290716	0.380444	Quadrant I
	y2040	DJI	-0.00741193	0.372692	0.476875	Quadrant IV
	y2040	MDG	0.0481471	0.369835	0.216082	Quadrant II
	y2040	MUS	1.01e-08	0.198451	0.462117	Quadrant I
	y2040	ATF	1.01e-08	0.325654	0.550209	Quadrant I
	y2040	CHN	0.108997	0.172128	0.509943	Quadrant I
	y2040	IND	0.0150495	0.173679	0.233277	Quadrant I
	y2040	NPL	-0.216159	0.180656	0.153602	Quadrant III
	y2040	MNG	0.0400966	0.613529	0.66828	Quadrant I
	y2040	MMR	0.13479	0.170548	0.376183	Quadrant I
	y2040	LAO	-0.235945	0.291134	0.504652	Quadrant IV
	y2040	THA	0.10379	0.277353	0.441606	Quadrant I
	y2040	KHM	0.134119	0.447854	0.452622	Quadrant I
	y2040	VNM	-0.24669	0.257183	0.538779	Quadrant IV
	y2040	RUS	0.00563745	0.381444	0.623361	Quadrant I
	y2040	PRK	0.092985	0.110737	-0.351091	Quadrant III
	y2040	GRL	8.15133e-06	0.365183	0.690774	Quadrant I
	y2040	ISL	0.000724249	0.648445	0.755329	Quadrant I
	y2040	ESP	0.00279513	0.215661	0.574111	Quadrant I
	y2040	IRL	0.00277206	0.396165	0.662016	Quadrant I
	y2040	PRT	0.000463932	0.302167	0.682515	Quadrant I
	y2040	GBR	0.155973	0.408717	0.586595	Quadrant I
	y2040	FRA	0.106308	0.352066	0.617295	Quadrant I
	y2040	BEL	0.00160982	0.492819	0.642794	Quadrant I
	y2040	NLD	0.00112441	0.448431	0.584104	Quadrant I
	y2040	NOR	0.000401138	0.375764	0.719724	Quadrant I
	y2040	LUX	0.00147366	0.289228	0.688802	Quadrant I
	y2040	DEU	0.0145899	0.537728	0.632102	Quadrant I
	y2040	CHE	-0.00572725	0.614007	0.691032	Quadrant I
	y2040	ITA	0.0116577	0.261738	0.580477	Quadrant I
	y2040	DNK	0.00147366	0.469224	0.686654	Quadrant I
	y2040	AUT	0.396041	0.601249	0.661875	Quadrant I
	y2040	SWE	-0.505046	0.376869	0.55262	Quadrant I
	y2040	CZE	0.0109513	0.603229	0.598351	Quadrant I
	y2040	HRV	0.135677	0.377518	0.555811	Quadrant I
	y2040	SVN	0.144372	0.405506	0.563791	Quadrant I
	y2040	SJM	5.99143e-08	0.373971	0.688397	Quadrant IV
	y2040	POL	0.00148497	0.63506	0.585348	Quadrant I
	y2040	BIH	-0.0096762	0.231061	0.678358	Quadrant I
	y2040	HUN	0.145654	0.766646	0.610153	Quadrant I
	y2040	SVK	0.231686	0.699076	0.556863	Quadrant I
	y2040	MNE	-0.00970749	0.374135	0.680989	Quadrant I
	y2040	SRB	-0.0107979	0.48476	0.632264	Quadrant I
	y2040	ALB	0.00137472	0.31432	0.676114	Quadrant I
	y2040	GRC	-8.08419e-05	0.194539	0.564886	Quadrant I
	y2040	MKD	-0.00865991	0.295083	0.588581	Quadrant I
	y2040	ROU	0.108643	0.416981	0.56717	Quadrant I
	y2040	LTU	0.00147366	0.52592	0.653274	Quadrant I
	y2040	LVA	0.00157641	0.432754	0.648084	Quadrant I
	y2040	FIN	-0.437828	0.446302	0.607753	Quadrant I
	y2040	EST	0.00159097	0.445385	0.648977	Quadrant I
	y2040	BGR	0.0737117	0.57527	0.530759	Quadrant I
	y2040	BLR	0.020928	0.465858	0.648517	Quadrant I
	y2040	TUR	0.0277163	0.126994	0.526783	Quadrant I
	y2040	MDA	0.0251025	0.420547	0.542806	Quadrant I
	y2040	CYP	0.00152614	0.174618	0.461001	Quadrant I
	y2040	IRN	-0.000475115	0.100219	0.3609	Quadrant IV
	y2040	UKR	0.0249526	0.472168	0.596881	Quadrant I
	y2040	GEO	0.0163451	0.383279	0.453217	Quadrant I
	y2040	ARM	0.00998054	0.460836	0.543757	Quadrant I
	y2040	AZE	0.0144309	0.29469	0.395462	Quadrant II
	y2040	KAZ	0.00857385	0.433508	0.58519	Quadrant I
	y2040	TKM	0.0135804	0.430321	0.620551	Quadrant I
	y2040	UZB	0.0143929	0.324323	0.525004	Quadrant I
	y2040	AFG	0.00193536	0.515994	-0.151454	Quadrant III
	y2040	TJK	0.0179108	0.354312	0.281647	Quadrant II
	y2040	KGZ	0.0123036	0.373091	0.509714	Quadrant I
	y2040	MEX	0.341709	0.389876	0.414252	Quadrant I
	y2040	USA	0.0519504	0.433486	0.578543	Quadrant I
	y2040	GTM	0.360201	0.370797	0.109713	Quadrant II
	y2040	ECU	0.202998	0.55237	0.410279	Quadrant IV
	y2040	SLV	0.232032	0.335534	0.267618	Quadrant II
	y2040	HND	0.249495	0.473793	0.250797	Quadrant II
	y2040	BLZ	0.816412	0.272873	0.50404	Quadrant I
	y2040	NIC	0.161643	0.335248	0.208014	Quadrant II
	y2040	CRI	0.234065	0.395499	0.412188	Quadrant I
	y2040	CUB	0.10035	0.460732	0.371035	Quadrant I
	y2040	PAN	0.122961	0.323529	0.469064	Quadrant I
	y2040	PER	0.108154	0.197773	0.396663	Quadrant I
	y2040	COL	0.124971	0.565978	0.341032	Quadrant I
	y2040	BHS	0.944308	0.305137	0.581358	Quadrant I
	y2040	JAM	0.233195	0.241893	0.399997	Quadrant I
	y2040	CHL	0.0709459	0.535518	0.477455	Quadrant I
	y2040	HTI	0.0735775	0.230135	0.218994	Quadrant II
	y2040	BRA	0.114428	0.398039	0.523072	Quadrant I
	y2040	ARG	0.167464	0.742414	0.581838	Quadrant I
	y2040	VEN	-0.08446	0.369495	0.300853	Quadrant II
	y2040	DOM	0.263413	0.275052	0.453552	Quadrant I
	y2040	BOL	0.0747322	0.646606	0.423974	Quadrant I
	y2040	PRY	0.0504702	0.514303	0.445124	Quadrant I
	y2040	TTO	0.0291692	0.305753	0.321431	Quadrant I
	y2040	FLK	0.111111	0.366338	0.600894	Quadrant I
	y2040	GUY	0.0426637	0.247264	0.499387	Quadrant I
	y2040	URY	0.013893	0.592119	0.530254	Quadrant I
	y2040	SUR	-0.300379	0.420259	0.354635	Quadrant I
	y2040	GUF	-2.41612	0.315182	0.500832	Quadrant I
	y2040	SGS	1	0.359103	0.58825	Quadrant I
	y2040	MAR	2.53707e-05	0.214305	0.507947	Quadrant I
	y2040	TUN	0.0166451	0.128838	0.464375	Quadrant I
	y2040	SAU	0.00655084	0.172456	0.481286	Quadrant I
	y2040	ISR	3.59723e-10	0.146888	0.638582	Quadrant I
	y2040	JOR	-1.40583e-09	0.260845	0.469442	Quadrant I
	y2040	LBN	-9.0213e-10	0.123643	0.524807	Quadrant IV
	y2040	SYR	1.19002e-10	0.283776	0.558891	Quadrant I
	y2040	IRQ	4.10712e-05	0.257064	0.0967534	Quadrant II
	y2040	YEM	0.000940624	0.428411	-0.0518922	Quadrant III
	y2040	KWT	-1.63785e-09	0.246933	0.595325	Quadrant I
	y2040	QAT	-2.58871e-06	0.394994	0.69586	Quadrant IV
	y2040	OMN	0.0203828	0.165973	0.595889	Quadrant I
	y2040	ARE	-3.04624e-09	0.119528	0.453331	Quadrant I
	y2040	PAK	0.00658251	0.523115	0.251328	Quadrant IV
	y2040	CAN	0.00672974	0.322657	0.547851	Quadrant I
	y2040	PRI	0.317383	0.332479	0.565539	Quadrant I
	y2040	AUS	0.0494313	0.427009	0.592085	Quadrant I
	y2040	JPN	0.0242158	0.21131	0.443737	Quadrant IV
	y2040	NZL	0.00415372	0.440929	0.595324	Quadrant I
	y2040	IDN	-0.00945246	0.271932	0.254425	Quadrant IV
	y2040	MYS	-0.00598228	0.259043	0.456942	Quadrant I
	y2040	SGP	-0.00697648	0.353416	0.623135	Quadrant I
	y2040	BRN	-0.00697646	0.180166	0.422704	Quadrant I
	y2040	PHL	0.0273726	0.390323	0.458515	Quadrant I
	y2040	TLS	-1.30019e-09	0.49494	0.222718	Quadrant III
	y2040	KOR	0.0980473	0.152332	0.528323	Quadrant IV
	y2040	PNG	-0.128715	0.218949	0.357168	Quadrant III
	y2040	SLB	-0.00697646	0.19617	0.416398	Quadrant I
	y2040	NCL	0.15135	0.251054	0.56229	Quadrant IV
	y2040	VUT	-0.00697645	0.193131	0.504312	Quadrant I
	y2040	FJI	0.00284252	0.175135	0.474383	Quadrant I
	y2040	REU	0.00349056	0.311274	0.624008	Quadrant I
	y2040	LKA	-0.238506	0.160879	0.236424	Quadrant III
	y2040	BGD	-0.233334	0.283533	0.243818	Quadrant III
	y2040	BTN	0.0605721	0.355475	0.570785	Quadrant IV
	y2050	SEN	0.277152	0.0450603	0.440477	Quadrant I
	y2050	GMB	0.00202079	0.128205	0.437607	Quadrant I
	y2050	MRT	0.0695196	0.495076	0.470284	Quadrant IV
	y2050	ESH	0.0294118	0.309388	0.500428	Quadrant I
	y2050	GNB	0.0020208	0.41711	0.527072	Quadrant I
	y2050	GIN	0.00180046	0.232149	0.615199	Quadrant I
	y2050	SLE	0.00144423	0.048751	0.527655	Quadrant I
	y2050	MLI	0.276184	0.416852	0.482142	Quadrant I
	y2050	LBR	-0.00677927	0.271507	0.418398	Quadrant II
	y2050	CIV	0.000796622	0.150625	0.65419	Quadrant I
	y2050	BFA	0.338146	0.1529	0.672098	Quadrant I
	y2050	GHA	0.00147636	0.101633	0.608655	Quadrant I
	y2050	TGO	-0.019293	0.102275	0.45893	Quadrant I
	y2050	NER	0.172006	0.106428	0.444586	Quadrant I
	y2050	BEN	-0.0498731	0.0313206	0.480834	Quadrant IV
	y2050	DZA	0.0304725	0.216613	0.422537	Quadrant I
	y2050	NGA	0.229387	0.0883989	0.479755	Quadrant I
	y2050	CMR	-0.173787	0.0708854	0.602322	Quadrant I
	y2050	GAB	-0.000863955	0.232854	0.591496	Quadrant I
	y2050	GNQ	-0.0503703	0.409021	0.649568	Quadrant I
	y2050	NAM	0.0417912	0.473824	0.552681	Quadrant I
	y2050	AGO	0.00807892	0.301483	0.332712	Quadrant IV
	y2050	COG	-0.000882735	0.27951	0.486244	Quadrant I
	y2050	COD	-0.0125237	0.155573	0.35946	Quadrant III
	y2050	LBY	-0.00575506	0.317835	0.724993	Quadrant I
	y2050	TCD	-0.0231806	0.180041	0.387907	Quadrant II
	y2050	CAF	-0.174008	0.370233	0.582627	Quadrant I
	y2050	ZAF	0.0120192	0.615756	0.598463	Quadrant I
	y2050	BWA	0.000145722	0.423571	0.464648	Quadrant IV
	y2050	ZMB	-0.0338508	0.145923	0.429076	Quadrant III
	y2050	SDN	0.000230486	0.565116	0.584685	Quadrant I
	y2050	ZWE	0.080866	0.635284	0.482041	Quadrant I
	y2050	LSO	0.000419729	0.708263	0.536665	Quadrant I
	y2050	BDI	0.00872656	0.175559	0.325755	Quadrant III
	y2050	RWA	0.0143531	0.18319	0.527203	Quadrant IV
	y2050	TZA	0.00738557	0.103078	0.507359	Quadrant I
	y2050	UGA	0.00444303	0.0950663	0.575585	Quadrant IV
	y2050	MOZ	0.045304	0.196382	0.476773	Quadrant I
	y2050	SWZ	0.00361909	0.517313	0.40908	Quadrant I
	y2050	MWI	0.176172	0.197726	0.429738	Quadrant II
	y2050	ETH	0.00723752	0.438282	0.447369	Quadrant II
	y2050	EGY	-0.00922337	0.150242	0.606016	Quadrant I
	y2050	KEN	-0.00175588	0.482414	0.460591	Quadrant I
	y2050	ERI	0.0238627	0.360345	0.274127	Quadrant I
	y2050	SOM	0.212686	0.332532	0.372571	Quadrant I
	y2050	DJI	0.0538089	0.468683	0.504139	Quadrant IV
	y2050	MDG	0.00221265	0.387658	0.389786	Quadrant II
	y2050	MUS	1.01e-08	0.201713	0.495657	Quadrant I
	y2050	ATF	1.01e-08	0.363799	0.627033	Quadrant I
	y2050	CHN	0.195262	0.224756	0.691609	Quadrant I
	y2050	IND	0.0197074	0.171954	0.416848	Quadrant I
	y2050	NPL	-0.232397	0.238198	0.383153	Quadrant IV
	y2050	MNG	0.0592526	0.854434	0.741225	Quadrant I
	y2050	MMR	0.192632	0.133605	0.518149	Quadrant I
	y2050	LAO	-0.273307	0.302843	0.627285	Quadrant IV
	y2050	THA	0.12326	0.282331	0.557429	Quadrant I
	y2050	KHM	0.183932	0.397416	0.598072	Quadrant I
	y2050	VNM	-0.274555	0.308929	0.633341	Quadrant IV
	y2050	RUS	0.03758	0.45776	0.77506	Quadrant I
	y2050	PRK	0.233579	0.144978	-0.226888	Quadrant II
	y2050	GRL	3.28901e-06	0.428658	0.788756	Quadrant I
	y2050	ISL	0.000292851	0.646553	0.835308	Quadrant I
	y2050	ESP	0.626014	0.234893	0.759006	Quadrant I
	y2050	IRL	0.0100574	0.494286	0.808094	Quadrant I
	y2050	PRT	0.66341	0.325399	0.822035	Quadrant I
	y2050	GBR	0.166695	0.523222	0.767634	Quadrant I
	y2050	FRA	0.248261	0.413832	0.785758	Quadrant I
	y2050	BEL	0.117329	0.611513	0.800062	Quadrant I
	y2050	NLD	0.183253	0.567848	0.767252	Quadrant I
	y2050	NOR	0.00156839	0.412808	0.811272	Quadrant I
	y2050	LUX	0.00516015	0.344197	0.824014	Quadrant I
	y2050	DEU	0.0215955	0.698024	0.793176	Quadrant I
	y2050	CHE	0.0172487	0.796887	0.792552	Quadrant I
	y2050	ITA	0.588231	0.318722	0.765483	Quadrant I
	y2050	DNK	0.00516013	0.434981	0.82513	Quadrant I
	y2050	AUT	0.419183	0.76902	0.809422	Quadrant I
	y2050	SWE	-0.506292	0.467704	0.74866	Quadrant IV
	y2050	CZE	0.0170132	0.7983	0.774054	Quadrant I
	y2050	HRV	0.208989	0.474703	0.751179	Quadrant I
	y2050	SVN	0.184853	0.503044	0.754181	Quadrant I
	y2050	SJM	-4.72783e-08	0.436948	0.787097	Quadrant I
	y2050	POL	0.00522644	0.805545	0.765951	Quadrant I
	y2050	BIH	0.0268355	0.290402	0.791045	Quadrant I
	y2050	HUN	0.185285	0.995226	0.781668	Quadrant I
	y2050	SVK	0.255011	0.899504	0.750099	Quadrant I
	y2050	MNE	0.0272747	0.495009	0.788764	Quadrant I
	y2050	SRB	0.0261015	0.619664	0.754832	Quadrant I
	y2050	ALB	0.0293812	0.391404	0.786	Quadrant I
	y2050	GRC	0.624329	0.239978	0.758101	Quadrant I
	y2050	MKD	0.0237102	0.386212	0.730288	Quadrant I
	y2050	ROU	0.277241	0.510765	0.758286	Quadrant I
	y2050	LTU	0.00516013	0.587521	0.803832	Quadrant I
	y2050	LVA	0.00538249	0.511706	0.801937	Quadrant I
	y2050	FIN	-0.443227	0.562234	0.780495	Quadrant IV
	y2050	EST	0.00706356	0.559551	0.803003	Quadrant I
	y2050	BGR	0.373369	0.748273	0.738659	Quadrant I
	y2050	BLR	0.0178656	0.578848	0.791862	Quadrant I
	y2050	TUR	0.0282603	0.148664	0.687608	Quadrant I
	y2050	MDA	0.0196623	0.518049	0.729541	Quadrant I
	y2050	CYP	0.666094	0.19229	0.696116	Quadrant IV
	y2050	IRN	-0.000274369	0.10741	0.514183	Quadrant IV
	y2050	UKR	0.0195927	0.582542	0.767944	Quadrant I
	y2050	GEO	0.0140951	0.463138	0.677502	Quadrant I
	y2050	ARM	0.435132	0.601081	0.723713	Quadrant I
	y2050	AZE	0.655688	0.344212	0.636779	Quadrant I
	y2050	KAZ	0.466861	0.509141	0.742914	Quadrant I
	y2050	TKM	0.837019	0.562687	0.764359	Quadrant I
	y2050	UZB	0.804547	0.457549	0.717062	Quadrant I
	y2050	AFG	0.00697052	0.604003	0.267259	Quadrant II
	y2050	TJK	0.704988	0.470643	0.612569	Quadrant II
	y2050	KGZ	0.55079	0.514107	0.722342	Quadrant I
	y2050	MEX	0.394722	0.530706	0.600846	Quadrant I
	y2050	USA	0.067563	0.570067	0.748532	Quadrant I
	y2050	GTM	0.432323	0.494333	0.41474	Quadrant II
	y2050	ECU	0.233619	0.720586	0.616163	Quadrant I
	y2050	SLV	0.347595	0.471051	0.524455	Quadrant I
	y2050	HND	0.366827	0.660255	0.529075	Quadrant I
	y2050	BLZ	0.814328	0.361365	0.675664	Quadrant I
	y2050	NIC	0.20916	0.502259	0.501965	Quadrant II
	y2050	CRI	0.31809	0.509535	0.598026	Quadrant I
	y2050	CUB	0.096326	0.619601	0.572609	Quadrant I
	y2050	PAN	0.271636	0.353946	0.638378	Quadrant I
	y2050	PER	0.201014	0.209729	0.594015	Quadrant I
	y2050	COL	0.295285	0.697978	0.55354	Quadrant I
	y2050	BHS	0.942205	0.363582	0.708016	Quadrant I
	y2050	JAM	0.24472	0.283972	0.60048	Quadrant I
	y2050	CHL	0.111867	0.680094	0.642523	Quadrant I
	y2050	HTI	0.145482	0.334144	0.549554	Quadrant II
	y2050	BRA	0.353522	0.519911	0.674221	Quadrant I
	y2050	ARG	0.75574	0.980468	0.720992	Quadrant I
	y2050	VEN	0.321202	0.469345	0.534193	Quadrant IV
	y2050	DOM	0.273119	0.319657	0.621	Quadrant I
	y2050	BOL	0.177116	0.853494	0.631947	Quadrant I
	y2050	PRY	0.303637	0.673125	0.626051	Quadrant I
	y2050	TTO	0.791362	0.389225	0.519956	Quadrant IV
	y2050	FLK	0.111111	0.425864	0.715419	Quadrant I
	y2050	GUY	0.371938	0.24436	0.650482	Quadrant IV
	y2050	URY	0.877233	0.776861	0.684983	Quadrant I
	y2050	SUR	-0.800796	0.473318	0.574414	Quadrant IV
	y2050	GUF	-10.6655	0.359221	0.640157	Quadrant IV
	y2050	SGS	1	0.416468	0.708575	Quadrant I
	y2050	MAR	2.0071e-05	0.231708	0.642037	Quadrant I
	y2050	TUN	-0.0606317	0.141525	0.591808	Quadrant I
	y2050	SAU	0.0385926	0.18679	0.598099	Quadrant I
	y2050	ISR	1.36663e-09	0.148566	0.725801	Quadrant I
	y2050	JOR	1.25243e-09	0.317839	0.624191	Quadrant I
	y2050	LBN	-3.57246e-10	0.156786	0.644678	Quadrant IV
	y2050	SYR	-7.29499e-12	0.378308	0.685207	Quadrant I
	y2050	IRQ	3.78053e-05	0.304911	0.325332	Quadrant II
	y2050	YEM	0.012333	0.498168	0.367332	Quadrant II
	y2050	KWT	-9.4472e-10	0.255593	0.690943	Quadrant I
	y2050	QAT	1.54225e-06	0.430387	0.752664	Quadrant I
	y2050	OMN	0.0851459	0.179619	0.672945	Quadrant I
	y2050	ARE	-2.46737e-08	0.126861	0.558554	Quadrant I
	y2050	PAK	0.0101705	0.660697	0.451578	Quadrant I
	y2050	CAN	0.00244663	0.433396	0.673095	Quadrant I
	y2050	PRI	0.32038	0.387686	0.695483	Quadrant I
	y2050	AUS	0.0419157	0.53419	0.705931	Quadrant I
	y2050	JPN	-0.0238946	0.128065	0.635174	Quadrant IV
	y2050	NZL	0.00225327	0.562497	0.709494	Quadrant I
	y2050	IDN	-0.00350376	0.229893	0.418639	Quadrant IV
	y2050	MYS	0.00537906	0.215505	0.555541	Quadrant I
	y2050	SGP	0.00624241	0.415116	0.689783	Quadrant I
	y2050	BRN	0.00624241	0.198488	0.517003	Quadrant I
	y2050	PHL	0.0367199	0.412002	0.57597	Quadrant I
	y2050	TLS	-0.0127072	0.65212	0.4887	Quadrant I
	y2050	KOR	0.235333	0.113226	0.613748	Quadrant I
	y2050	PNG	-0.153287	0.22841	0.561295	Quadrant IV
	y2050	SLB	0.00624241	0.202191	0.598825	Quadrant I
	y2050	NCL	0.240114	0.267568	0.638271	Quadrant I
	y2050	VUT	0.00624242	0.271838	0.644552	Quadrant I
	y2050	FJI	0.0131863	0.192444	0.592069	Quadrant I
	y2050	REU	0.00740442	0.349833	0.630787	Quadrant I
	y2050	LKA	-0.266807	0.108949	0.424274	Quadrant IV
	y2050	BGD	-0.254715	0.209915	0.44341	Quadrant IV
	y2050	BTN	0.129416	0.391253	0.663871	Quadrant I
	y2060	SEN	0.298897	0.0688614	0.529563	Quadrant I
	y2060	GMB	-0.0372807	0.126905	0.531262	Quadrant I
	y2060	MRT	0.0812656	0.514813	0.522844	Quadrant IV
	y2060	ESH	0.0285714	0.306667	0.49124	Quadrant I
	y2060	GNB	-0.00731637	0.502745	0.611677	Quadrant I
	y2060	GIN	0.016858	0.256601	0.661346	Quadrant I
	y2060	SLE	0.19036	0.0761582	0.628698	Quadrant I
	y2060	MLI	0.295842	0.388086	0.555505	Quadrant I
	y2060	LBR	0.205965	0.277755	0.549519	Quadrant I
	y2060	CIV	-0.0430875	0.164347	0.693379	Quadrant I
	y2060	BFA	0.340783	0.138459	0.729428	Quadrant I
	y2060	GHA	-0.028344	0.109065	0.664257	Quadrant I
	y2060	TGO	-0.0945692	0.132208	0.566375	Quadrant I
	y2060	NER	0.197015	0.111628	0.531492	Quadrant I
	y2060	BEN	-0.0585679	0.0372969	0.566572	Quadrant IV
	y2060	DZA	0.0339705	0.216404	0.454782	Quadrant I
	y2060	NGA	0.254964	0.100945	0.565638	Quadrant I
	y2060	CMR	0.422825	0.0887747	0.657699	Quadrant I
	y2060	GAB	-0.000220301	0.236566	0.624181	Quadrant I
	y2060	GNQ	-0.0218667	0.414287	0.675147	Quadrant I
	y2060	NAM	0.118473	0.472812	0.594956	Quadrant I
	y2060	AGO	0.00651216	0.285473	0.486328	Quadrant I
	y2060	COG	0.107623	0.297025	0.563732	Quadrant I
	y2060	COD	-0.00682267	0.150076	0.511912	Quadrant I
	y2060	LBY	0.000249626	0.315315	0.722381	Quadrant I
	y2060	TCD	0.555073	0.20438	0.512774	Quadrant I
	y2060	CAF	0.323205	0.393868	0.653409	Quadrant I
	y2060	ZAF	0.0437346	0.607253	0.626371	Quadrant I
	y2060	BWA	0.000489516	0.4222	0.496147	Quadrant IV
	y2060	ZMB	-0.00741947	0.162375	0.540206	Quadrant IV
	y2060	SDN	0.0676175	0.623917	0.627669	Quadrant I
	y2060	ZWE	0.13452	0.688057	0.588024	Quadrant I
	y2060	LSO	0.000569688	0.737392	0.617241	Quadrant I
	y2060	BDI	0.0105616	0.165255	0.496144	Quadrant I
	y2060	RWA	0.0154778	0.18581	0.601369	Quadrant I
	y2060	TZA	-0.00320789	0.124898	0.58662	Quadrant I
	y2060	UGA	0.00561465	0.141403	0.651089	Quadrant I
	y2060	MOZ	0.0117484	0.224141	0.579181	Quadrant I
	y2060	SWZ	0.0223015	0.519769	0.470722	Quadrant I
	y2060	MWI	0.174419	0.212074	0.557126	Quadrant I
	y2060	ETH	0.000959582	0.481732	0.539118	Quadrant IV
	y2060	EGY	-0.00766386	0.142933	0.615804	Quadrant I
	y2060	KEN	0.0013487	0.516634	0.532965	Quadrant IV
	y2060	ERI	0.0274353	0.346079	0.366944	Quadrant I
	y2060	SOM	0.000742748	0.336743	0.361527	Quadrant I
	y2060	DJI	0.0644406	0.48175	0.540418	Quadrant IV
	y2060	MDG	-0.0739759	0.36221	0.512249	Quadrant I
	y2060	MUS	1.01e-08	0.196984	0.5278	Quadrant I
	y2060	ATF	1.01e-08	0.358965	0.632708	Quadrant I
	y2060	CHN	0.203697	0.228594	0.682114	Quadrant I
	y2060	IND	0.0252181	0.185188	0.472257	Quadrant I
	y2060	NPL	-0.230681	0.236616	0.456607	Quadrant IV
	y2060	MNG	0.0464633	0.871141	0.757725	Quadrant I
	y2060	MMR	0.256125	0.156613	0.553626	Quadrant I
	y2060	LAO	-0.222233	0.313777	0.657392	Quadrant IV
	y2060	THA	0.128157	0.292423	0.576191	Quadrant I
	y2060	KHM	0.249757	0.417505	0.638356	Quadrant I
	y2060	VNM	-0.241964	0.315802	0.653207	Quadrant IV
	y2060	RUS	0.0310575	0.454162	0.779192	Quadrant I
	y2060	PRK	-0.379525	0.152509	-0.352923	Quadrant II
	y2060	GRL	3.54567e-06	0.421681	0.778668	Quadrant I
	y2060	ISL	0.000317642	0.642578	0.829217	Quadrant I
	y2060	ESP	0.450976	0.23779	0.761094	Quadrant I
	y2060	IRL	0.0102941	0.485121	0.807441	Quadrant I
	y2060	PRT	0.564863	0.323991	0.823126	Quadrant I
	y2060	GBR	0.169867	0.521701	0.768645	Quadrant I
	y2060	FRA	0.188332	0.413837	0.787465	Quadrant I
	y2060	BEL	0.0886661	0.604096	0.800806	Quadrant I
	y2060	NLD	0.133651	0.562049	0.767536	Quadrant I
	y2060	NOR	0.000422915	0.407644	0.803364	Quadrant I
	y2060	LUX	0.0136515	0.34485	0.822561	Quadrant I
	y2060	DEU	0.0273596	0.694204	0.793573	Quadrant I
	y2060	CHE	0.000158902	0.795579	0.78464	Quadrant IV
	y2060	ITA	0.416806	0.3168	0.767223	Quadrant I
	y2060	DNK	0.0136516	0.430666	0.825176	Quadrant I
	y2060	AUT	0.409263	0.762506	0.809167	Quadrant I
	y2060	SWE	-0.490903	0.465095	0.749287	Quadrant IV
	y2060	CZE	0.021104	0.797322	0.775186	Quadrant I
	y2060	HRV	0.19437	0.472922	0.752751	Quadrant I
	y2060	SVN	0.23052	0.501333	0.756418	Quadrant I
	y2060	SJM	-1.18983e-08	0.430608	0.777043	Quadrant I
	y2060	POL	0.0135853	0.805093	0.766559	Quadrant I
	y2060	BIH	-8.22212e-05	0.295257	0.787737	Quadrant IV
	y2060	HUN	0.134594	1.0067	0.782638	Quadrant I
	y2060	SVK	0.239281	0.889825	0.750057	Quadrant I
	y2060	MNE	1.67718e-05	0.504184	0.784303	Quadrant IV
	y2060	SRB	-0.00109825	0.623849	0.747549	Quadrant IV
	y2060	ALB	-0.000573849	0.396007	0.781428	Quadrant I
	y2060	GRC	0.438325	0.243726	0.761366	Quadrant IV
	y2060	MKD	-0.000224785	0.390933	0.724319	Quadrant IV
	y2060	ROU	0.201839	0.514428	0.761618	Quadrant I
	y2060	LTU	0.0136516	0.588324	0.804298	Quadrant I
	y2060	LVA	0.0136443	0.509796	0.803689	Quadrant I
	y2060	FIN	-0.427891	0.567751	0.781978	Quadrant IV
	y2060	EST	0.0110886	0.562303	0.805187	Quadrant I
	y2060	BGR	0.271672	0.74825	0.74248	Quadrant I
	y2060	BLR	0.0152826	0.5778	0.795719	Quadrant I
	y2060	TUR	-7.92762e-05	0.150742	0.679961	Quadrant I
	y2060	MDA	0.0176128	0.523555	0.735823	Quadrant I
	y2060	CYP	0.435849	0.192774	0.697238	Quadrant I
	y2060	IRN	-0.00038884	0.103201	0.520357	Quadrant IV
	y2060	UKR	0.0175369	0.588894	0.775964	Quadrant I
	y2060	GEO	0.0119855	0.464845	0.686155	Quadrant I
	y2060	ARM	0.3743	0.606798	0.727689	Quadrant I
	y2060	AZE	0.604899	0.341944	0.653013	Quadrant I
	y2060	KAZ	0.367079	0.500653	0.742476	Quadrant I
	y2060	TKM	0.815004	0.549089	0.764792	Quadrant I
	y2060	UZB	0.780647	0.462965	0.725353	Quadrant I
	y2060	AFG	-0.048045	0.600308	0.41825	Quadrant II
	y2060	TJK	0.674836	0.503891	0.642236	Quadrant I
	y2060	KGZ	0.511065	0.540507	0.738204	Quadrant I
	y2060	MEX	0.380757	0.54133	0.616598	Quadrant I
	y2060	USA	0.0654203	0.564618	0.750971	Quadrant I
	y2060	GTM	0.405412	0.526697	0.460409	Quadrant I
	y2060	ECU	0.240242	0.729495	0.638063	Quadrant I
	y2060	SLV	0.332184	0.495039	0.556573	Quadrant I
	y2060	HND	0.343872	0.7044	0.570733	Quadrant I
	y2060	BLZ	0.80358	0.382941	0.695679	Quadrant I
	y2060	NIC	0.189586	0.539481	0.547312	Quadrant I
	y2060	CRI	0.271862	0.515979	0.609558	Quadrant I
	y2060	CUB	0.0399421	0.645941	0.591368	Quadrant I
	y2060	PAN	0.215657	0.34992	0.646742	Quadrant I
	y2060	PER	0.181095	0.218843	0.610354	Quadrant I
	y2060	COL	0.265771	0.70558	0.570018	Quadrant I
	y2060	BHS	0.938303	0.360481	0.711952	Quadrant I
	y2060	JAM	0.174904	0.300331	0.623601	Quadrant I
	y2060	CHL	0.106979	0.685661	0.651398	Quadrant I
	y2060	HTI	0.109666	0.387834	0.612959	Quadrant I
	y2060	BRA	0.346435	0.528597	0.684248	Quadrant I
	y2060	ARG	0.77958	0.975681	0.730222	Quadrant I
	y2060	VEN	0.280663	0.478746	0.556991	Quadrant IV
	y2060	DOM	0.22796	0.320166	0.629697	Quadrant I
	y2060	BOL	0.157981	0.889708	0.657296	Quadrant I
	y2060	PRY	0.199015	0.695215	0.642819	Quadrant I
	y2060	TTO	0.78482	0.389589	0.528207	Quadrant I
	y2060	FLK	0.125	0.419464	0.717095	Quadrant I
	y2060	GUY	0.361735	0.252683	0.657898	Quadrant I
	y2060	URY	0.876196	0.774921	0.694396	Quadrant I
	y2060	SUR	-0.812329	0.477275	0.595162	Quadrant IV
	y2060	GUF	-10.6883	0.349872	0.63524	Quadrant IV
	y2060	SGS	1	0.410257	0.710109	Quadrant I
	y2060	MAR	0.000419407	0.221213	0.65529	Quadrant I
	y2060	TUN	-0.0474051	0.141238	0.602059	Quadrant I
	y2060	SAU	0.020464	0.180891	0.580556	Quadrant I
	y2060	ISR	-5.08007e-10	0.147496	0.720801	Quadrant I
	y2060	JOR	8.9537e-12	0.32765	0.633472	Quadrant IV
	y2060	LBN	2.07708e-10	0.158641	0.652753	Quadrant IV
	y2060	SYR	2.08218e-10	0.390526	0.697339	Quadrant I
	y2060	IRQ	3.45728e-05	0.299213	0.322485	Quadrant I
	y2060	YEM	0.00465377	0.492628	0.469493	Quadrant II
	y2060	KWT	-2.83495e-10	0.251037	0.677657	Quadrant IV
	y2060	QAT	1.56817e-06	0.425747	0.747777	Quadrant IV
	y2060	OMN	0.0444905	0.175666	0.671767	Quadrant I
	y2060	ARE	-4.0369e-09	0.121491	0.540349	Quadrant IV
	y2060	PAK	-0.00933786	0.697802	0.505929	Quadrant I
	y2060	CAN	-0.000530058	0.426885	0.674894	Quadrant I
	y2060	PRI	0.271714	0.386041	0.699132	Quadrant I
	y2060	AUS	0.0356886	0.525576	0.708704	Quadrant I
	y2060	JPN	-0.0472823	0.129578	0.647084	Quadrant I
	y2060	NZL	0.00152553	0.557404	0.713055	Quadrant I
	y2060	IDN	0.00965063	0.229999	0.450158	Quadrant IV
	y2060	MYS	0.0250256	0.218502	0.566253	Quadrant IV
	y2060	SGP	0.0289001	0.408942	0.692418	Quadrant IV
	y2060	BRN	0.0289001	0.195383	0.521823	Quadrant IV
	y2060	PHL	0.0519808	0.422066	0.604568	Quadrant I
	y2060	TLS	-0.014727	0.701161	0.563265	Quadrant IV
	y2060	KOR	-0.387722	0.111903	0.619719	Quadrant I
	y2060	PNG	-0.141826	0.262425	0.615578	Quadrant IV
	y2060	SLB	0.0289002	0.240913	0.649782	Quadrant IV
	y2060	NCL	0.375645	0.260458	0.642677	Quadrant I
	y2060	VUT	0.0289001	0.322364	0.680792	Quadrant IV
	y2060	FJI	0.0280143	0.209181	0.62245	Quadrant I
	y2060	REU	0.00928635	0.342901	0.640706	Quadrant I
	y2060	LKA	-0.195354	0.119037	0.468056	Quadrant IV
	y2060	BGD	-0.160848	0.204178	0.498963	Quadrant IV
	y2060	BTN	-0.131034	0.396306	0.679368	Quadrant I
	y2070	SEN	0.376637	0.0688614	0.592503	Quadrant I
	y2070	GMB	-0.101297	0.126905	0.594788	Quadrant I
	y2070	MRT	0.147228	0.514813	0.573074	Quadrant I
	y2070	ESH	0.0555556	0.306667	0.455177	Quadrant I
	y2070	GNB	-0.0217699	0.502745	0.662292	Quadrant I
	y2070	GIN	0.0360181	0.256601	0.692483	Quadrant I
	y2070	SLE	0.323011	0.0761582	0.691219	Quadrant I
	y2070	MLI	0.641351	0.388086	0.615161	Quadrant I
	y2070	LBR	0.348208	0.277755	0.625655	Quadrant I
	y2070	CIV	-0.0900038	0.164347	0.720327	Quadrant I
	y2070	BFA	0.654143	0.138459	0.768448	Quadrant I
	y2070	GHA	-0.0595233	0.109065	0.703162	Quadrant I
	y2070	TGO	-0.136911	0.132208	0.638915	Quadrant I
	y2070	NER	0.139787	0.111628	0.607504	Quadrant I
	y2070	BEN	-0.0541569	0.0372969	0.62834	Quadrant IV
	y2070	DZA	0.0319384	0.216404	0.455304	Quadrant I
	y2070	NGA	0.153963	0.100945	0.62384	Quadrant I
	y2070	CMR	0.411151	0.0887747	0.696949	Quadrant I
	y2070	GAB	0.000450907	0.236566	0.651153	Quadrant I
	y2070	GNQ	0.018686	0.414287	0.69654	Quadrant I
	y2070	NAM	0.104018	0.472812	0.629172	Quadrant I
	y2070	AGO	0.0100806	0.285473	0.580343	Quadrant I
	y2070	COG	0.218022	0.297025	0.611524	Quadrant I
	y2070	COD	-0.00338201	0.150076	0.600309	Quadrant I
	y2070	LBY	0.00328332	0.315315	0.702713	Quadrant I
	y2070	TCD	0.747639	0.20438	0.592656	Quadrant I
	y2070	CAF	0.331862	0.393868	0.706	Quadrant I
	y2070	ZAF	0.0519296	0.607253	0.651401	Quadrant I
	y2070	BWA	0.000588051	0.4222	0.525963	Quadrant I
	y2070	ZMB	0.0148187	0.162375	0.610851	Quadrant IV
	y2070	SDN	0.0883461	0.623917	0.651339	Quadrant I
	y2070	ZWE	0.102705	0.688057	0.659513	Quadrant I
	y2070	LSO	0.000696038	0.737392	0.670211	Quadrant I
	y2070	BDI	0.0121836	0.165255	0.594445	Quadrant I
	y2070	RWA	0.0171718	0.18581	0.654344	Quadrant I
	y2070	TZA	0.0300506	0.124898	0.643799	Quadrant I
	y2070	UGA	0.0020457	0.141403	0.702264	Quadrant I
	y2070	MOZ	-0.0375759	0.224141	0.640806	Quadrant I
	y2070	SWZ	0.0168807	0.519769	0.525021	Quadrant I
	y2070	MWI	0.013331	0.212074	0.639731	Quadrant I
	y2070	ETH	-0.0138355	0.481732	0.606209	Quadrant IV
	y2070	EGY	-8.91842e-05	0.142933	0.600931	Quadrant I
	y2070	KEN	-0.0931223	0.516634	0.591394	Quadrant IV
	y2070	ERI	0.0231436	0.346079	0.468522	Quadrant I
	y2070	SOM	-0.0145341	0.336743	0.359887	Quadrant I
	y2070	DJI	0.0005423	0.48175	0.578255	Quadrant I
	y2070	MDG	-0.0287312	0.36221	0.593224	Quadrant I
	y2070	MUS	1.01e-08	0.196984	0.558001	Quadrant I
	y2070	ATF	1.01e-08	0.358965	0.638317	Quadrant I
	y2070	CHN	0.216694	0.228594	0.677627	Quadrant I
	y2070	IND	0.0390596	0.185188	0.520215	Quadrant I
	y2070	NPL	-0.131622	0.236616	0.515763	Quadrant IV
	y2070	MNG	0.140178	0.871141	0.764411	Quadrant I
	y2070	MMR	0.256598	0.156613	0.586234	Quadrant I
	y2070	LAO	-0.140665	0.313777	0.683407	Quadrant IV
	y2070	THA	0.125981	0.292423	0.593521	Quadrant I
	y2070	KHM	0.244062	0.417505	0.668848	Quadrant I
	y2070	VNM	-0.144503	0.315802	0.671101	Quadrant IV
	y2070	RUS	0.0253864	0.454162	0.775947	Quadrant I
	y2070	PRK	-0.101727	0.152509	-0.448528	Quadrant II
	y2070	GRL	3.46521e-06	0.421681	0.753191	Quadrant I
	y2070	ISL	0.000316594	0.642578	0.812177	Quadrant I
	y2070	ESP	0.0856063	0.23779	0.755468	Quadrant I
	y2070	IRL	0.00759847	0.485121	0.800593	Quadrant I
	y2070	PRT	0.0238996	0.323991	0.818845	Quadrant I
	y2070	GBR	0.165433	0.521701	0.762684	Quadrant I
	y2070	FRA	0.131336	0.413837	0.781973	Quadrant I
	y2070	BEL	0.035595	0.604096	0.794941	Quadrant I
	y2070	NLD	0.0495607	0.562049	0.759465	Quadrant I
	y2070	NOR	0.0410139	0.407644	0.783193	Quadrant I
	y2070	LUX	0.0122223	0.34485	0.816251	Quadrant I
	y2070	DEU	0.0392961	0.694204	0.787932	Quadrant I
	y2070	CHE	0.346596	0.795579	0.763984	Quadrant I
	y2070	ITA	0.129334	0.3168	0.760887	Quadrant I
	y2070	DNK	0.0122223	0.430666	0.819981	Quadrant I
	y2070	AUT	0.433243	0.762506	0.803625	Quadrant I
	y2070	SWE	-0.471876	0.465095	0.742794	Quadrant IV
	y2070	CZE	0.0132761	0.797322	0.769913	Quadrant I
	y2070	HRV	0.352927	0.472922	0.746279	Quadrant I
	y2070	SVN	0.5442	0.501333	0.750002	Quadrant I
	y2070	SJM	1.74266e-08	0.430608	0.752047	Quadrant I
	y2070	POL	0.0121312	0.805093	0.761604	Quadrant I
	y2070	BIH	0.434228	0.295257	0.769924	Quadrant I
	y2070	HUN	0.045652	1.0067	0.776899	Quadrant I
	y2070	SVK	0.219392	0.889825	0.743399	Quadrant I
	y2070	MNE	0.436697	0.504184	0.766911	Quadrant I
	y2070	SRB	0.435445	0.623849	0.724147	Quadrant I
	y2070	ALB	0.397374	0.396007	0.764647	Quadrant I
	y2070	GRC	0.112412	0.243726	0.755803	Quadrant IV
	y2070	MKD	0.413685	0.390933	0.702833	Quadrant I
	y2070	ROU	0.0937828	0.514428	0.757106	Quadrant I
	y2070	LTU	0.0122223	0.588324	0.801255	Quadrant I
	y2070	LVA	0.0121767	0.509796	0.799702	Quadrant I
	y2070	FIN	-0.407407	0.567751	0.776974	Quadrant IV
	y2070	EST	0.00889741	0.562303	0.800918	Quadrant I
	y2070	BGR	0.145842	0.74825	0.73596	Quadrant I
	y2070	BLR	0.0131555	0.5778	0.792939	Quadrant I
	y2070	TUR	0.125846	0.150742	0.653354	Quadrant I
	y2070	MDA	0.0155702	0.523555	0.734795	Quadrant I
	y2070	CYP	0.0028299	0.192774	0.690762	Quadrant I
	y2070	IRN	-0.000458477	0.103201	0.486899	Quadrant IV
	y2070	UKR	0.0155021	0.588894	0.775311	Quadrant I
	y2070	GEO	0.0103755	0.464845	0.684604	Quadrant I
	y2070	ARM	0.332283	0.606798	0.72461	Quadrant I
	y2070	AZE	0.536663	0.341944	0.659235	Quadrant I
	y2070	KAZ	0.330292	0.500653	0.735757	Quadrant I
	y2070	TKM	0.28788	0.549089	0.758801	Quadrant I
	y2070	UZB	0.533715	0.462965	0.726038	Quadrant I
	y2070	AFG	-0.0553477	0.600308	0.508842	Quadrant I
	y2070	TJK	0.533301	0.503891	0.651648	Quadrant I
	y2070	KGZ	0.451471	0.540507	0.74255	Quadrant I
	y2070	MEX	0.432532	0.54133	0.609856	Quadrant I
	y2070	USA	0.0555527	0.564618	0.747127	Quadrant I
	y2070	GTM	0.460904	0.526697	0.467385	Quadrant I
	y2070	ECU	0.241413	0.729495	0.636021	Quadrant I
	y2070	SLV	0.545719	0.495039	0.558472	Quadrant I
	y2070	HND	0.445933	0.7044	0.579198	Quadrant I
	y2070	BLZ	0.788902	0.382941	0.695741	Quadrant I
	y2070	NIC	0.263637	0.539481	0.554288	Quadrant I
	y2070	CRI	0.209998	0.515979	0.600747	Quadrant I
	y2070	CUB	-0.022029	0.645941	0.588495	Quadrant I
	y2070	PAN	0.135356	0.34992	0.634217	Quadrant I
	y2070	PER	0.15261	0.218843	0.603278	Quadrant I
	y2070	COL	0.235847	0.70558	0.562061	Quadrant I
	y2070	BHS	0.933362	0.360481	0.702815	Quadrant I
	y2070	JAM	0.144724	0.300331	0.623817	Quadrant I
	y2070	CHL	0.100241	0.685661	0.64146	Quadrant I
	y2070	HTI	0.252817	0.387834	0.633913	Quadrant I
	y2070	BRA	0.338829	0.528597	0.676068	Quadrant I
	y2070	ARG	0.769727	0.975681	0.722699	Quadrant I
	y2070	VEN	0.270338	0.478746	0.550987	Quadrant IV
	y2070	DOM	0.232803	0.320166	0.618593	Quadrant I
	y2070	BOL	0.146782	0.889708	0.656788	Quadrant I
	y2070	PRY	0.197844	0.695215	0.638871	Quadrant I
	y2070	TTO	0.784385	0.389589	0.509378	Quadrant I
	y2070	FLK	0.125	0.419464	0.705492	Quadrant I
	y2070	GUY	0.352626	0.252683	0.650224	Quadrant I
	y2070	URY	0.882495	0.774921	0.684931	Quadrant I
	y2070	SUR	-0.815836	0.477275	0.589908	Quadrant IV
	y2070	GUF	-10.6989	0.349872	0.614498	Quadrant IV
	y2070	SGS	1	0.410257	0.69799	Quadrant I
	y2070	MAR	0.000433321	0.221213	0.638128	Quadrant I
	y2070	TUN	0.000229026	0.141238	0.584452	Quadrant I
	y2070	SAU	0.0170892	0.180891	0.527375	Quadrant I
	y2070	ISR	-1.301e-09	0.147496	0.691865	Quadrant I
	y2070	JOR	-3.88033e-10	0.32765	0.605953	Quadrant I
	y2070	LBN	6.11185e-10	0.158641	0.632535	Quadrant I
	y2070	SYR	6.01583e-06	0.390526	0.685559	Quadrant I
	y2070	IRQ	9.3252e-05	0.299213	0.264718	Quadrant I
	y2070	YEM	0.00345871	0.492628	0.488114	Quadrant I
	y2070	KWT	-1.05172e-09	0.251037	0.631963	Quadrant I
	y2070	QAT	-1.29848e-06	0.425747	0.726339	Quadrant I
	y2070	OMN	0.036924	0.175666	0.647842	Quadrant I
	y2070	ARE	-1.86576e-08	0.121491	0.484806	Quadrant IV
	y2070	PAK	-0.00582652	0.697802	0.546031	Quadrant I
	y2070	CAN	-0.0003976	0.426885	0.673802	Quadrant I
	y2070	PRI	0.231916	0.386041	0.688312	Quadrant I
	y2070	AUS	0.0328435	0.525576	0.708137	Quadrant I
	y2070	JPN	-0.10404	0.129578	0.652911	Quadrant I
	y2070	NZL	0.00144136	0.557404	0.712752	Quadrant I
	y2070	IDN	0.0549218	0.229999	0.478605	Quadrant IV
	y2070	MYS	0.0999837	0.218502	0.577937	Quadrant IV
	y2070	SGP	0.113493	0.408942	0.695994	Quadrant IV
	y2070	BRN	0.113493	0.195383	0.530019	Quadrant IV
	y2070	PHL	0.0998446	0.422066	0.629661	Quadrant I
	y2070	TLS	-0.0146763	0.701161	0.608696	Quadrant IV
	y2070	KOR	-0.106184	0.111903	0.627668	Quadrant I
	y2070	PNG	-0.0635898	0.262425	0.648722	Quadrant IV
	y2070	SLB	0.113493	0.240913	0.682734	Quadrant IV
	y2070	NCL	0.37488	0.260458	0.646915	Quadrant I
	y2070	VUT	0.113493	0.322364	0.703245	Quadrant IV
	y2070	FJI	0.0944225	0.209181	0.644228	Quadrant I
	y2070	REU	0.0108034	0.342901	0.651789	Quadrant I
	y2070	LKA	-0.116225	0.119037	0.498041	Quadrant IV
	y2070	BGD	-0.0849449	0.204178	0.544724	Quadrant IV
	y2070	BTN	0.00123904	0.396306	0.69082	Quadrant I
	y2080	SEN	0.343121	0.0877291	0.631076	Quadrant I
	y2080	GMB	-0.100652	0.140891	0.631818	Quadrant I
	y2080	MRT	0.121597	0.528166	0.607321	Quadrant I
	y2080	ESH	0.0294118	0.303958	0.46051	Quadrant I
	y2080	GNB	-0.0212146	0.55115	0.692715	Quadrant I
	y2080	GIN	0.0564009	0.268699	0.710972	Quadrant I
	y2080	SLE	0.486919	0.100744	0.725346	Quadrant I
	y2080	MLI	0.617938	0.368671	0.656852	Quadrant I
	y2080	LBR	0.517555	0.286124	0.66881	Quadrant IV
	y2080	CIV	-0.232986	0.170193	0.735421	Quadrant I
	y2080	BFA	0.623246	0.135433	0.791235	Quadrant I
	y2080	GHA	-0.136176	0.114277	0.725218	Quadrant I
	y2080	TGO	-0.35046	0.163441	0.683104	Quadrant IV
	y2080	NER	0.113351	0.127241	0.65938	Quadrant I
	y2080	BEN	-0.193511	0.0454008	0.667797	Quadrant IV
	y2080	DZA	0.0296805	0.216124	0.480434	Quadrant I
	y2080	NGA	0.119329	0.110772	0.656932	Quadrant I
	y2080	CMR	0.432571	0.101339	0.719305	Quadrant IV
	y2080	GAB	0.000669271	0.237592	0.666346	Quadrant IV
	y2080	GNQ	0.100581	0.415925	0.708613	Quadrant IV
	y2080	NAM	0.037758	0.466342	0.649506	Quadrant I
	y2080	AGO	0.0417195	0.274366	0.633263	Quadrant I
	y2080	COG	0.387496	0.306138	0.637394	Quadrant IV
	y2080	COD	0.0225152	0.170934	0.65042	Quadrant IV
	y2080	LBY	0.00229439	0.313034	0.706552	Quadrant IV
	y2080	TCD	0.76995	0.235673	0.641106	Quadrant IV
	y2080	CAF	0.532211	0.396713	0.739588	Quadrant IV
	y2080	ZAF	0.0253608	0.597501	0.666486	Quadrant I
	y2080	BWA	0.000668554	0.416703	0.545233	Quadrant I
	y2080	ZMB	0.0404668	0.195061	0.651422	Quadrant IV
	y2080	SDN	0.0967994	0.672466	0.677757	Quadrant I
	y2080	ZWE	0.00159953	0.761125	0.702218	Quadrant I
	y2080	LSO	0.000995624	0.756332	0.702517	Quadrant I
	y2080	BDI	-0.0578815	0.181087	0.6479	Quadrant I
	y2080	RWA	-0.0939053	0.204502	0.687978	Quadrant I
	y2080	TZA	0.119263	0.149044	0.678482	Quadrant I
	y2080	UGA	-0.0436021	0.180757	0.73233	Quadrant I
	y2080	MOZ	-0.0561555	0.254213	0.678381	Quadrant I
	y2080	SWZ	0.0180074	0.522302	0.560635	Quadrant I
	y2080	MWI	0.0109978	0.266971	0.688063	Quadrant I
	y2080	ETH	-0.0334051	0.526756	0.65	Quadrant I
	y2080	EGY	-0.000123658	0.136306	0.613304	Quadrant IV
	y2080	KEN	-0.138534	0.545459	0.631573	Quadrant IV
	y2080	ERI	-0.0173229	0.328281	0.552788	Quadrant I
	y2080	SOM	-0.0186848	0.339558	0.37136	Quadrant I
	y2080	DJI	0.000632063	0.488619	0.603809	Quadrant I
	y2080	MDG	-0.00203398	0.381948	0.642971	Quadrant I
	y2080	MUS	1.01e-08	0.192268	0.577665	Quadrant I
	y2080	ATF	1.01e-08	0.354165	0.643422	Quadrant I
	y2080	CHN	0.143603	0.231749	0.675304	Quadrant I
	y2080	IND	0.0330159	0.194938	0.565428	Quadrant I
	y2080	NPL	-0.131807	0.235042	0.565881	Quadrant IV
	y2080	MNG	0.173755	0.88503	0.77376	Quadrant I
	y2080	MMR	0.280111	0.17875	0.612618	Quadrant I
	y2080	LAO	-0.126376	0.322776	0.701624	Quadrant IV
	y2080	THA	0.0958261	0.30223	0.60519	Quadrant I
	y2080	KHM	0.260547	0.442951	0.689855	Quadrant I
	y2080	VNM	-0.142981	0.327535	0.683926	Quadrant IV
	y2080	RUS	0.0253969	0.450127	0.781888	Quadrant I
	y2080	PRK	-0.18166	0.161996	-0.557046	Quadrant II
	y2080	GRL	3.64554e-06	0.414754	0.746197	Quadrant I
	y2080	ISL	0.000332831	0.637968	0.808936	Quadrant I
	y2080	ESP	0.127123	0.240657	0.752905	Quadrant I
	y2080	IRL	0.00426536	0.476401	0.796493	Quadrant I
	y2080	PRT	0.0667269	0.321573	0.817185	Quadrant I
	y2080	GBR	0.153323	0.519833	0.759808	Quadrant I
	y2080	FRA	0.153307	0.413291	0.779773	Quadrant I
	y2080	BEL	0.0433042	0.596028	0.791809	Quadrant I
	y2080	NLD	0.0444835	0.555423	0.75598	Quadrant I
	y2080	NOR	0.0316508	0.402778	0.779567	Quadrant I
	y2080	LUX	-0.00637979	0.345512	0.813369	Quadrant I
	y2080	DEU	0.0226558	0.689679	0.785393	Quadrant I
	y2080	CHE	0.230114	0.793429	0.76038	Quadrant I
	y2080	ITA	0.0731628	0.31385	0.757973	Quadrant I
	y2080	DNK	-0.00654705	0.425629	0.818209	Quadrant I
	y2080	AUT	0.432159	0.755144	0.80064	Quadrant I
	y2080	SWE	-0.463968	0.462646	0.739777	Quadrant IV
	y2080	CZE	-0.00520313	0.795494	0.766476	Quadrant I
	y2080	HRV	0.38183	0.470497	0.743442	Quadrant I
	y2080	SVN	0.558332	0.498472	0.746027	Quadrant I
	y2080	SJM	-3.58645e-08	0.424324	0.745647	Quadrant IV
	y2080	POL	-0.00634584	0.804358	0.759844	Quadrant I
	y2080	BIH	0.286439	0.297341	0.767934	Quadrant I
	y2080	HUN	0.0286151	1.01719	0.774462	Quadrant I
	y2080	SVK	0.209338	0.878597	0.73869	Quadrant I
	y2080	MNE	0.289456	0.511477	0.765992	Quadrant I
	y2080	SRB	0.273467	0.628341	0.7224	Quadrant I
	y2080	ALB	0.256314	0.400187	0.765207	Quadrant I
	y2080	GRC	0.0974943	0.245215	0.753417	Quadrant I
	y2080	MKD	0.267836	0.392735	0.700887	Quadrant I
	y2080	ROU	0.0574459	0.517271	0.756541	Quadrant I
	y2080	LTU	-0.00651484	0.589158	0.79885	Quadrant I
	y2080	LVA	-0.00591499	0.508031	0.797477	Quadrant I
	y2080	FIN	-0.396156	0.572886	0.775434	Quadrant IV
	y2080	EST	-0.00109906	0.563834	0.798533	Quadrant I
	y2080	BGR	0.120588	0.745663	0.732576	Quadrant I
	y2080	BLR	0.0107438	0.574816	0.798614	Quadrant I
	y2080	TUR	0.0836641	0.151945	0.651507	Quadrant I
	y2080	MDA	0.0135077	0.527987	0.746484	Quadrant I
	y2080	CYP	0.0028299	0.194333	0.688963	Quadrant I
	y2080	IRN	-0.000317985	0.0990238	0.497705	Quadrant IV
	y2080	UKR	0.0134391	0.592149	0.783427	Quadrant I
	y2080	GEO	0.00844157	0.46466	0.696366	Quadrant I
	y2080	ARM	0.343751	0.610963	0.73608	Quadrant I
	y2080	AZE	0.571032	0.339941	0.676665	Quadrant I
	y2080	KAZ	0.332267	0.494218	0.742845	Quadrant I
	y2080	TKM	0.488303	0.532469	0.763447	Quadrant I
	y2080	UZB	0.642301	0.464389	0.737266	Quadrant I
	y2080	AFG	-0.0022401	0.601981	0.57653	Quadrant I
	y2080	TJK	0.599671	0.522824	0.672684	Quadrant I
	y2080	KGZ	0.479573	0.5569	0.756784	Quadrant I
	y2080	MEX	0.52972	0.547588	0.602168	Quadrant I
	y2080	USA	0.0860732	0.55919	0.742519	Quadrant I
	y2080	GTM	0.736582	0.553087	0.469726	Quadrant I
	y2080	ECU	0.246805	0.73059	0.630009	Quadrant I
	y2080	SLV	0.641321	0.511691	0.557205	Quadrant I
	y2080	HND	0.640459	0.735706	0.581106	Quadrant I
	y2080	BLZ	0.926467	0.397772	0.693986	Quadrant I
	y2080	NIC	0.441614	0.564442	0.554316	Quadrant I
	y2080	CRI	0.535783	0.519838	0.591346	Quadrant I
	y2080	CUB	0.587403	0.668311	0.585586	Quadrant I
	y2080	PAN	0.252258	0.343564	0.622271	Quadrant I
	y2080	PER	0.158163	0.22399	0.597327	Quadrant I
	y2080	COL	0.314159	0.708681	0.551893	Quadrant I
	y2080	BHS	0.976734	0.358883	0.695294	Quadrant I
	y2080	JAM	0.625074	0.315857	0.623571	Quadrant I
	y2080	CHL	0.111984	0.687033	0.632292	Quadrant I
	y2080	HTI	0.605466	0.427346	0.644478	Quadrant I
	y2080	BRA	0.364124	0.533614	0.668214	Quadrant I
	y2080	ARG	0.781878	0.96424	0.713929	Quadrant I
	y2080	VEN	0.267571	0.483619	0.542981	Quadrant I
	y2080	DOM	0.618174	0.319233	0.607796	Quadrant I
	y2080	BOL	0.172467	0.907958	0.653645	Quadrant I
	y2080	PRY	0.205741	0.710523	0.632881	Quadrant I
	y2080	TTO	0.78459	0.38873	0.491937	Quadrant I
	y2080	FLK	0.125	0.413126	0.694011	Quadrant I
	y2080	GUY	0.350175	0.261332	0.648519	Quadrant I
	y2080	URY	0.889018	0.768122	0.674604	Quadrant I
	y2080	SUR	-0.815749	0.477994	0.583937	Quadrant IV
	y2080	GUF	-10.655	0.341829	0.596158	Quadrant IV
	y2080	SGS	1	0.4041	0.686641	Quadrant I
	y2080	MAR	0.00039775	0.212297	0.649799	Quadrant I
	y2080	TUN	0.00021308	0.139971	0.593832	Quadrant IV
	y2080	SAU	0.0229821	0.175194	0.527011	Quadrant I
	y2080	ISR	3.82843e-10	0.145886	0.694964	Quadrant I
	y2080	JOR	-1.96111e-10	0.333516	0.618773	Quadrant I
	y2080	LBN	9.45587e-11	0.157373	0.640254	Quadrant IV
	y2080	SYR	-5.66696e-06	0.396692	0.696982	Quadrant IV
	y2080	IRQ	-3.46162e-05	0.292889	0.310131	Quadrant I
	y2080	YEM	0.0061508	0.491205	0.535979	Quadrant I
	y2080	KWT	-2.57416e-09	0.245692	0.630985	Quadrant IV
	y2080	QAT	-8.1561e-06	0.421523	0.726225	Quadrant I
	y2080	OMN	0.0522789	0.170923	0.650212	Quadrant I
	y2080	ARE	4.76036e-09	0.116179	0.478831	Quadrant IV
	y2080	PAK	-0.00838508	0.72924	0.58299	Quadrant I
	y2080	CAN	-1.11549e-05	0.420994	0.687331	Quadrant I
	y2080	PRI	0.706338	0.383692	0.678686	Quadrant I
	y2080	AUS	0.0761293	0.517036	0.720316	Quadrant I
	y2080	JPN	-0.0822781	0.130931	0.65771	Quadrant IV
	y2080	NZL	0.00144515	0.551001	0.725008	Quadrant I
	y2080	IDN	0.0544412	0.229252	0.497388	Quadrant IV
	y2080	MYS	0.0968271	0.220662	0.586254	Quadrant I
	y2080	SGP	0.109403	0.402786	0.701763	Quadrant I
	y2080	BRN	0.109403	0.192602	0.534824	Quadrant I
	y2080	PHL	0.0856436	0.432588	0.648988	Quadrant I
	y2080	TLS	-0.0146254	0.737564	0.639037	Quadrant IV
	y2080	KOR	-0.188545	0.110289	0.633493	Quadrant I
	y2080	PNG	-0.0611753	0.284331	0.672369	Quadrant IV
	y2080	SLB	0.109403	0.265711	0.705558	Quadrant I
	y2080	NCL	0.42776	0.253929	0.652269	Quadrant I
	y2080	VUT	0.109403	0.350446	0.719788	Quadrant I
	y2080	FJI	0.0916022	0.223021	0.66292	Quadrant I
	y2080	REU	0.0143699	0.336438	0.657139	Quadrant I
	y2080	LKA	-0.111863	0.127238	0.520084	Quadrant IV
	y2080	BGD	-0.0894659	0.199811	0.579614	Quadrant IV
	y2080	BTN	-0.0260886	0.397624	0.700134	Quadrant I
	y2090	SEN	0.32416	0.0997477	0.654651	Quadrant I
	y2090	GMB	-0.103043	0.154374	0.654568	Quadrant IV
	y2090	MRT	0.187369	0.53565	0.630299	Quadrant I
	y2090	ESH	0.0666667	0.301259	0.455834	Quadrant I
	y2090	GNB	-0.0214866	0.577502	0.712034	Quadrant IV
	y2090	GIN	0.063163	0.272975	0.722928	Quadrant I
	y2090	SLE	0.491157	0.119482	0.74497	Quadrant I
	y2090	MLI	0.604551	0.358686	0.685145	Quadrant I
	y2090	LBR	0.521248	0.293928	0.694352	Quadrant IV
	y2090	CIV	-0.231223	0.171041	0.744305	Quadrant I
	y2090	BFA	0.6036	0.131626	0.80448	Quadrant I
	y2090	GHA	-0.131694	0.116819	0.738648	Quadrant I
	y2090	TGO	-0.362716	0.189512	0.709073	Quadrant IV
	y2090	NER	0.104093	0.162069	0.694445	Quadrant I
	y2090	BEN	-0.199501	0.0528867	0.692627	Quadrant IV
	y2090	DZA	0.0270658	0.214697	0.491625	Quadrant I
	y2090	NGA	0.0902928	0.118096	0.675877	Quadrant I
	y2090	CMR	0.431317	0.112102	0.733259	Quadrant I
	y2090	GAB	-0.000301941	0.236885	0.674074	Quadrant IV
	y2090	GNQ	0.110763	0.415206	0.715924	Quadrant IV
	y2090	NAM	0.0415441	0.456159	0.661351	Quadrant I
	y2090	AGO	0.0645003	0.29117	0.662302	Quadrant I
	y2090	COG	0.421604	0.309376	0.652383	Quadrant IV
	y2090	COD	0.0483287	0.193957	0.679673	Quadrant IV
	y2090	LBY	0.0016832	0.31034	0.707485	Quadrant IV
	y2090	TCD	0.848443	0.259671	0.669942	Quadrant I
	y2090	CAF	0.791658	0.401564	0.762424	Quadrant I
	y2090	ZAF	0.0166534	0.586962	0.673959	Quadrant I
	y2090	BWA	0.00355048	0.408196	0.554444	Quadrant I
	y2090	ZMB	0.0746181	0.215995	0.673974	Quadrant IV
	y2090	SDN	0.0994834	0.705623	0.689573	Quadrant I
	y2090	ZWE	-0.029568	0.815118	0.728618	Quadrant I
	y2090	LSO	0.00121501	0.762607	0.72157	Quadrant I
	y2090	BDI	-0.0600778	0.206251	0.679973	Quadrant I
	y2090	RWA	-0.0940917	0.216654	0.71011	Quadrant I
	y2090	TZA	0.237977	0.166188	0.699588	Quadrant I
	y2090	UGA	-0.0370219	0.209008	0.750333	Quadrant I
	y2090	MOZ	-0.0552898	0.283008	0.701471	Quadrant I
	y2090	SWZ	0.0143509	0.534664	0.582063	Quadrant IV
	y2090	MWI	-0.0242724	0.311525	0.716761	Quadrant I
	y2090	ETH	-0.0160991	0.558521	0.677015	Quadrant IV
	y2090	EGY	0.000505947	0.130215	0.617234	Quadrant IV
	y2090	KEN	0.0060181	0.564866	0.658458	Quadrant IV
	y2090	ERI	0.123242	0.317045	0.613546	Quadrant I
	y2090	SOM	0.0467301	0.337858	0.406907	Quadrant I
	y2090	DJI	0.054956	0.488747	0.619596	Quadrant I
	y2090	MDG	0.0220636	0.395874	0.674777	Quadrant IV
	y2090	MUS	1.01e-08	0.187531	0.587648	Quadrant I
	y2090	ATF	1.01e-08	0.349399	0.64551	Quadrant I
	y2090	CHN	0.147168	0.234346	0.67074	Quadrant I
	y2090	IND	0.0148597	0.204555	0.568027	Quadrant I
	y2090	NPL	-0.119465	0.247635	0.59524	Quadrant IV
	y2090	MNG	0.17867	0.89675	0.777289	Quadrant I
	y2090	MMR	0.184885	0.199443	0.631599	Quadrant I
	y2090	LAO	-0.12129	0.328478	0.712007	Quadrant IV
	y2090	THA	-0.0523828	0.309369	0.610804	Quadrant I
	y2090	KHM	0.153802	0.467482	0.703149	Quadrant I
	y2090	VNM	-0.129037	0.337195	0.692088	Quadrant IV
	y2090	RUS	0.0262639	0.446216	0.784037	Quadrant I
	y2090	PRK	-0.13308	0.174563	-0.665952	Quadrant III
	y2090	GRL	3.96781e-06	0.407875	0.751015	Quadrant I
	y2090	ISL	0.00035296	0.632497	0.814243	Quadrant I
	y2090	ESP	0.162351	0.242059	0.75358	Quadrant I
	y2090	IRL	0.00406502	0.467673	0.79474	Quadrant I
	y2090	PRT	0.0946176	0.318043	0.817087	Quadrant I
	y2090	GBR	0.16182	0.516908	0.759046	Quadrant I
	y2090	FRA	0.170259	0.411909	0.779706	Quadrant I
	y2090	BEL	0.0686417	0.58719	0.790552	Quadrant I
	y2090	NLD	0.0645235	0.548348	0.754377	Quadrant I
	y2090	NOR	0.0294656	0.397594	0.784962	Quadrant I
	y2090	LUX	0.00491962	0.343729	0.811566	Quadrant I
	y2090	DEU	0.03074	0.6842	0.784307	Quadrant I
	y2090	CHE	0.219941	0.790288	0.766109	Quadrant I
	y2090	ITA	0.0604667	0.31007	0.75719	Quadrant I
	y2090	DNK	0.00341461	0.420258	0.817567	Quadrant I
	y2090	AUT	0.43888	0.74663	0.799248	Quadrant I
	y2090	SWE	-0.462666	0.459533	0.738804	Quadrant IV
	y2090	CZE	0.00393543	0.792122	0.765041	Quadrant I
	y2090	HRV	0.389212	0.46688	0.742414	Quadrant I
	y2090	SVN	0.554505	0.493457	0.744959	Quadrant I
	y2090	SJM	2.04521e-08	0.418095	0.751106	Quadrant IV
	y2090	POL	0.00360647	0.802456	0.759138	Quadrant I
	y2090	BIH	0.276192	0.297454	0.775722	Quadrant I
	y2090	HUN	0.0198177	1.00998	0.7738	Quadrant I
	y2090	SVK	0.216831	0.865014	0.735361	Quadrant I
	y2090	MNE	0.279242	0.517765	0.772716	Quadrant I
	y2090	SRB	0.263028	0.632098	0.7317	Quadrant I
	y2090	ALB	0.246469	0.402754	0.772946	Quadrant I
	y2090	GRC	0.109889	0.244986	0.75324	Quadrant I
	y2090	MKD	0.258131	0.391676	0.708586	Quadrant I
	y2090	ROU	0.0421836	0.518424	0.757603	Quadrant I
	y2090	LTU	0.00370499	0.590099	0.798174	Quadrant I
	y2090	LVA	0.005291	0.505298	0.797406	Quadrant I
	y2090	FIN	-0.394114	0.577388	0.775139	Quadrant IV
	y2090	EST	0.00380822	0.563031	0.798275	Quadrant I
	y2090	BGR	0.115577	0.739144	0.731811	Quadrant I
	y2090	BLR	0.00895764	0.568983	0.800223	Quadrant I
	y2090	TUR	0.079984	0.152478	0.659888	Quadrant I
	y2090	MDA	0.00979684	0.529433	0.751179	Quadrant I
	y2090	CYP	0.00282995	0.195172	0.688884	Quadrant I
	y2090	IRN	-0.000354428	0.095924	0.502949	Quadrant IV
	y2090	UKR	0.00979228	0.592074	0.786578	Quadrant I
	y2090	GEO	0.00717014	0.46178	0.701267	Quadrant I
	y2090	ARM	0.344352	0.611527	0.740512	Quadrant I
	y2090	AZE	0.573211	0.335617	0.688794	Quadrant I
	y2090	KAZ	0.330184	0.487615	0.744179	Quadrant I
	y2090	TKM	0.63872	0.513757	0.761648	Quadrant I
	y2090	UZB	0.695937	0.461102	0.741105	Quadrant I
	y2090	AFG	-0.00250752	0.614604	0.61275	Quadrant IV
	y2090	TJK	0.622419	0.531798	0.681794	Quadrant I
	y2090	KGZ	0.481423	0.564713	0.762806	Quadrant I
	y2090	MEX	0.491963	0.550414	0.608284	Quadrant I
	y2090	USA	0.108302	0.553494	0.739179	Quadrant I
	y2090	GTM	0.725304	0.572969	0.486867	Quadrant I
	y2090	ECU	0.263277	0.726108	0.640507	Quadrant I
	y2090	SLV	0.597037	0.522174	0.572441	Quadrant I
	y2090	HND	0.61931	0.756551	0.597897	Quadrant I
	y2090	BLZ	0.925321	0.406094	0.702023	Quadrant I
	y2090	NIC	0.414802	0.579391	0.57112	Quadrant I
	y2090	CRI	0.53511	0.521465	0.598277	Quadrant I
	y2090	CUB	0.574993	0.685019	0.593653	Quadrant I
	y2090	PAN	0.254035	0.335831	0.623569	Quadrant I
	y2090	PER	0.153703	0.226572	0.600934	Quadrant I
	y2090	COL	0.317326	0.70797	0.558569	Quadrant I
	y2090	BHS	0.976374	0.35588	0.69743	Quadrant I
	y2090	JAM	0.61688	0.32774	0.633275	Quadrant I
	y2090	CHL	0.120314	0.684961	0.634898	Quadrant I
	y2090	HTI	0.582921	0.451729	0.659769	Quadrant I
	y2090	BRA	0.370714	0.536075	0.674077	Quadrant I
	y2090	ARG	0.781739	0.948602	0.719956	Quadrant I
	y2090	VEN	0.264757	0.485389	0.547915	Quadrant I
	y2090	DOM	0.598076	0.316942	0.608664	Quadrant I
	y2090	BOL	0.175693	0.913133	0.662123	Quadrant I
	y2090	PRY	0.20059	0.719123	0.638367	Quadrant I
	y2090	TTO	0.784928	0.386253	0.491107	Quadrant I
	y2090	FLK	0.125	0.406846	0.694433	Quadrant I
	y2090	GUY	0.349613	0.271785	0.656448	Quadrant I
	y2090	URY	0.887593	0.757938	0.680996	Quadrant I
	y2090	SUR	-0.815655	0.476707	0.58672	Quadrant IV
	y2090	GUF	-10.6087	0.334968	0.592134	Quadrant IV
	y2090	SGS	1	0.397997	0.687056	Quadrant I
	y2090	MAR	0.000452653	0.207761	0.653292	Quadrant I
	y2090	TUN	6.668e-05	0.137721	0.594592	Quadrant IV
	y2090	SAU	0.0289147	0.169575	0.522703	Quadrant I
	y2090	ISR	5.33397e-10	0.143718	0.694611	Quadrant IV
	y2090	JOR	-1.18782e-09	0.336534	0.623724	Quadrant IV
	y2090	LBN	1.17444e-09	0.154278	0.639958	Quadrant I
	y2090	SYR	5.1965e-06	0.39951	0.701245	Quadrant I
	y2090	IRQ	9.60577e-05	0.289348	0.353278	Quadrant I
	y2090	YEM	0.00737118	0.492551	0.5632	Quadrant I
	y2090	KWT	5.06611e-10	0.240763	0.626648	Quadrant IV
	y2090	QAT	-8.98633e-06	0.417042	0.721806	Quadrant I
	y2090	OMN	0.0677468	0.165266	0.645764	Quadrant I
	y2090	ARE	5.24619e-09	0.110389	0.470073	Quadrant IV
	y2090	PAK	-0.0243738	0.753545	0.601703	Quadrant IV
	y2090	CAN	-0.000755152	0.41479	0.679858	Quadrant IV
	y2090	PRI	0.70097	0.380887	0.680817	Quadrant I
	y2090	AUS	0.0566749	0.507957	0.714619	Quadrant I
	y2090	JPN	-0.0396946	0.131882	0.659449	Quadrant IV
	y2090	NZL	0.00522981	0.542564	0.719129	Quadrant I
	y2090	IDN	0.0531327	0.227794	0.508676	Quadrant IV
	y2090	MYS	0.0932022	0.22212	0.589286	Quadrant I
	y2090	SGP	0.105191	0.396767	0.701037	Quadrant I
	y2090	BRN	0.105191	0.18943	0.532275	Quadrant I
	y2090	PHL	0.0343471	0.449498	0.660571	Quadrant I
	y2090	TLS	-0.0150395	0.764419	0.654244	Quadrant IV
	y2090	KOR	-0.138807	0.108243	0.633558	Quadrant IV
	y2090	PNG	-0.0510603	0.297627	0.684271	Quadrant IV
	y2090	SLB	0.105191	0.28052	0.718438	Quadrant I
	y2090	NCL	0.37634	0.247595	0.651829	Quadrant I
	y2090	VUT	0.105191	0.368459	0.72822	Quadrant I
	y2090	FJI	0.0884502	0.232553	0.673653	Quadrant I
	y2090	REU	0.0164936	0.330333	0.659266	Quadrant I
	y2090	LKA	-0.0990716	0.132787	0.533322	Quadrant IV
	y2090	BGD	-0.093914	0.196373	0.601007	Quadrant IV
	y2090	BTN	-0.0109095	0.396495	0.703556	Quadrant IV
	y2100	SEN	0.305102	0.106297	0.67354	Quadrant I
	y2100	GMB	-0.106253	0.163361	0.67219	Quadrant IV
	y2100	MRT	0.229421	0.538447	0.649584	Quadrant I
	y2100	ESH	0.0769231	0.298572	0.495042	Quadrant I
	y2100	GNB	-0.0244895	0.596076	0.726078	Quadrant IV
	y2100	GIN	0.0638123	0.272636	0.733837	Quadrant I
	y2100	SLE	0.490819	0.132386	0.759407	Quadrant I
	y2100	MLI	0.652499	0.363022	0.706493	Quadrant I
	y2100	LBR	0.521409	0.313935	0.711735	Quadrant I
	y2100	CIV	-0.238359	0.168619	0.753001	Quadrant IV
	y2100	BFA	0.645348	0.133732	0.814978	Quadrant I
	y2100	GHA	-0.135813	0.118162	0.749436	Quadrant IV
	y2100	TGO	-0.36948	0.207397	0.727437	Quadrant IV
	y2100	NER	0.0227113	0.189529	0.719151	Quadrant I
	y2100	BEN	-0.200149	0.0603468	0.711156	Quadrant IV
	y2100	DZA	0.025348	0.212929	0.540172	Quadrant I
	y2100	NGA	-0.0129346	0.121451	0.690836	Quadrant I
	y2100	CMR	0.425805	0.119195	0.745129	Quadrant I
	y2100	GAB	-0.000344188	0.234756	0.682415	Quadrant IV
	y2100	GNQ	0.134026	0.413102	0.72283	Quadrant IV
	y2100	NAM	0.106203	0.443458	0.674583	Quadrant I
	y2100	AGO	0.117827	0.311831	0.68374	Quadrant I
	y2100	COG	0.452413	0.308825	0.665653	Quadrant I
	y2100	COD	0.112636	0.209145	0.700014	Quadrant IV
	y2100	LBY	0.00162276	0.307365	0.731227	Quadrant I
	y2100	TCD	0.861949	0.282051	0.693359	Quadrant I
	y2100	CAF	0.800807	0.407666	0.780051	Quadrant I
	y2100	ZAF	0.0150154	0.576143	0.682107	Quadrant I
	y2100	BWA	0.00405057	0.397502	0.566478	Quadrant I
	y2100	ZMB	0.106132	0.226697	0.692551	Quadrant IV
	y2100	SDN	0.0944823	0.724115	0.723736	Quadrant I
	y2100	ZWE	-0.0312567	0.845725	0.747831	Quadrant I
	y2100	LSO	0.00136156	0.758167	0.737079	Quadrant I
	y2100	BDI	-0.061743	0.223153	0.701738	Quadrant I
	y2100	RWA	-0.0941086	0.223122	0.727548	Quadrant I
	y2100	TZA	0.316907	0.177013	0.716987	Quadrant IV
	y2100	UGA	-0.0383527	0.22708	0.763895	Quadrant I
	y2100	MOZ	-0.0487005	0.30332	0.717882	Quadrant I
	y2100	SWZ	0.0130821	0.53928	0.603182	Quadrant I
	y2100	MWI	-0.00367212	0.343597	0.736826	Quadrant I
	y2100	ETH	0.0102734	0.576633	0.698229	Quadrant I
	y2100	EGY	0.00334174	0.128676	0.64812	Quadrant IV
	y2100	KEN	-0.00350088	0.57611	0.679532	Quadrant I
	y2100	ERI	0.134308	0.328474	0.655606	Quadrant I
	y2100	SOM	0.11003	0.329713	0.462675	Quadrant I
	y2100	DJI	0.0541793	0.483373	0.637722	Quadrant I
	y2100	MDG	0.0489298	0.403077	0.697828	Quadrant IV
	y2100	MUS	1.01e-08	0.183197	0.597522	Quadrant I
	y2100	ATF	1.01e-08	0.344666	0.659169	Quadrant I
	y2100	CHN	0.0858374	0.236564	0.678318	Quadrant I
	y2100	IND	0.0129909	0.212045	0.573004	Quadrant I
	y2100	NPL	-0.105727	0.257338	0.630625	Quadrant IV
	y2100	MNG	0.19651	0.905227	0.789529	Quadrant I
	y2100	MMR	0.346373	0.217806	0.658849	Quadrant I
	y2100	LAO	-0.104396	0.330864	0.731113	Quadrant IV
	y2100	THA	0.145428	0.314066	0.627963	Quadrant I
	y2100	KHM	0.325268	0.484378	0.722948	Quadrant I
	y2100	VNM	-0.123009	0.345501	0.70869	Quadrant IV
	y2100	RUS	0.024047	0.442179	0.786525	Quadrant I
	y2100	PRK	-0.0113194	0.18653	-0.74283	Quadrant III
	y2100	GRL	4.00643e-06	0.401043	0.771709	Quadrant I
	y2100	ISL	0.00033883	0.626287	0.831556	Quadrant I
	y2100	ESP	0.187749	0.242822	0.752422	Quadrant I
	y2100	IRL	0.00277196	0.459223	0.792994	Quadrant I
	y2100	PRT	0.102719	0.313426	0.816357	Quadrant I
	y2100	GBR	0.160151	0.513281	0.757737	Quadrant I
	y2100	FRA	0.173785	0.410048	0.778588	Quadrant I
	y2100	BEL	0.0721824	0.57794	0.78954	Quadrant I
	y2100	NLD	0.0741853	0.540874	0.752492	Quadrant I
	y2100	NOR	0.025177	0.391873	0.804329	Quadrant I
	y2100	LUX	0.000378938	0.337651	0.809235	Quadrant I
	y2100	DEU	0.0236362	0.678023	0.782938	Quadrant I
	y2100	CHE	0.191091	0.786497	0.785468	Quadrant I
	y2100	ITA	0.107152	0.305684	0.756236	Quadrant I
	y2100	DNK	-0.00370665	0.414039	0.816283	Quadrant I
	y2100	AUT	0.442638	0.737167	0.798074	Quadrant I
	y2100	SWE	-0.46382	0.455896	0.737812	Quadrant IV
	y2100	CZE	-0.0025404	0.787179	0.763328	Quadrant I
	y2100	HRV	0.386373	0.46235	0.741795	Quadrant I
	y2100	SVN	0.549792	0.488121	0.74439	Quadrant I
	y2100	SJM	1.78617e-08	0.411919	0.772571	Quadrant IV
	y2100	POL	-0.00307062	0.79931	0.758222	Quadrant I
	y2100	BIH	0.242283	0.296138	0.797151	Quadrant IV
	y2100	HUN	0.00958545	0.997325	0.772819	Quadrant I
	y2100	SVK	0.217435	0.849277	0.7344	Quadrant I
	y2100	MNE	0.245279	0.522351	0.791268	Quadrant I
	y2100	SRB	0.228358	0.634407	0.757038	Quadrant IV
	y2100	ALB	0.21412	0.403314	0.793667	Quadrant IV
	y2100	GRC	0.153071	0.243849	0.752609	Quadrant I
	y2100	MKD	0.225236	0.388701	0.732983	Quadrant IV
	y2100	ROU	0.0476622	0.518119	0.757896	Quadrant I
	y2100	LTU	-0.00291676	0.589346	0.797264	Quadrant I
	y2100	LVA	0.00136925	0.50126	0.796796	Quadrant I
	y2100	FIN	-0.392954	0.581359	0.773842	Quadrant IV
	y2100	EST	0.00142659	0.561501	0.797295	Quadrant I
	y2100	BGR	0.13502	0.730513	0.730623	Quadrant I
	y2100	BLR	0.00962214	0.561811	0.802236	Quadrant I
	y2100	TUR	0.0677404	0.152396	0.686248	Quadrant IV
	y2100	MDA	0.0109324	0.528791	0.755095	Quadrant I
	y2100	CYP	0.00673122	0.194857	0.688592	Quadrant I
	y2100	IRN	-0.000456846	0.0934495	0.545257	Quadrant IV
	y2100	UKR	0.0109098	0.589348	0.789627	Quadrant I
	y2100	GEO	0.00761722	0.457145	0.706798	Quadrant I
	y2100	ARM	0.316708	0.610185	0.745816	Quadrant I
	y2100	AZE	0.53728	0.331864	0.69909	Quadrant I
	y2100	KAZ	0.309391	0.481291	0.746511	Quadrant I
	y2100	TKM	0.658707	0.494363	0.763784	Quadrant I
	y2100	UZB	0.679455	0.454685	0.746859	Quadrant I
	y2100	AFG	-0.00123632	0.645127	0.652092	Quadrant IV
	y2100	TJK	0.594448	0.533895	0.691864	Quadrant I
	y2100	KGZ	0.446342	0.567253	0.768285	Quadrant I
	y2100	MEX	0.471948	0.550749	0.607702	Quadrant I
	y2100	USA	0.132688	0.547862	0.743287	Quadrant I
	y2100	GTM	0.71424	0.587097	0.493688	Quadrant I
	y2100	ECU	0.251759	0.717274	0.638974	Quadrant I
	y2100	SLV	0.551238	0.527176	0.574432	Quadrant I
	y2100	HND	0.609495	0.768935	0.599415	Quadrant I
	y2100	BLZ	0.923368	0.40942	0.703463	Quadrant I
	y2100	NIC	0.442393	0.586729	0.573235	Quadrant I
	y2100	CRI	0.540118	0.520877	0.596704	Quadrant I
	y2100	CUB	0.56396	0.695959	0.596771	Quadrant I
	y2100	PAN	0.273194	0.32725	0.6213	Quadrant I
	y2100	PER	0.145348	0.227637	0.60558	Quadrant I
	y2100	COL	0.320756	0.70416	0.556957	Quadrant I
	y2100	BHS	0.975757	0.351391	0.695742	Quadrant I
	y2100	JAM	0.604787	0.335934	0.637876	Quadrant I
	y2100	CHL	0.132377	0.680478	0.633011	Quadrant I
	y2100	HTI	0.558485	0.463892	0.667839	Quadrant I
	y2100	BRA	0.384309	0.535965	0.672196	Quadrant I
	y2100	ARG	0.775817	0.930521	0.713941	Quadrant I
	y2100	VEN	0.261391	0.485134	0.550754	Quadrant I
	y2100	DOM	0.584723	0.313457	0.610338	Quadrant I
	y2100	BOL	0.163151	0.909017	0.659976	Quadrant I
	y2100	PRY	0.183383	0.722075	0.640188	Quadrant I
	y2100	TTO	0.785392	0.382946	0.490244	Quadrant I
	y2100	FLK	0.142857	0.400615	0.692169	Quadrant I
	y2100	GUY	0.348512	0.280793	0.660811	Quadrant I
	y2100	URY	0.894639	0.745479	0.675213	Quadrant I
	y2100	SUR	-0.814574	0.474159	0.591871	Quadrant IV
	y2100	GUF	-10.5558	0.329145	0.58699	Quadrant IV
	y2100	SGS	1	0.391946	0.684795	Quadrant I
	y2100	MAR	0.000437112	0.204396	0.682938	Quadrant I
	y2100	TUN	0.00230833	0.134991	0.629401	Quadrant IV
	y2100	SAU	0.0152713	0.163999	0.554793	Quadrant I
	y2100	ISR	7.14475e-10	0.141302	0.718005	Quadrant IV
	y2100	JOR	-2.54409e-10	0.337392	0.656263	Quadrant I
	y2100	LBN	7.57741e-10	0.149813	0.669668	Quadrant I
	y2100	SYR	6.62467e-05	0.399926	0.72813	Quadrant I
	y2100	IRQ	7.54081e-05	0.287451	0.42175	Quadrant I
	y2100	YEM	0.00187613	0.502227	0.615648	Quadrant I
	y2100	KWT	-3.10636e-09	0.235935	0.650752	Quadrant IV
	y2100	QAT	2.53685e-06	0.412151	0.739218	Quadrant I
	y2100	OMN	0.0248876	0.159006	0.669378	Quadrant I
	y2100	ARE	7.46237e-09	0.106636	0.50154	Quadrant IV
	y2100	PAK	-0.00271178	0.769324	0.63021	Quadrant IV
	y2100	CAN	-0.00101392	0.408147	0.692981	Quadrant IV
	y2100	PRI	0.692378	0.377762	0.680395	Quadrant I
	y2100	AUS	0.0605056	0.498456	0.726127	Quadrant I
	y2100	JPN	-0.0390454	0.132727	0.663055	Quadrant IV
	y2100	NZL	0.00582777	0.532609	0.73095	Quadrant I
	y2100	IDN	0.0383539	0.225808	0.535868	Quadrant I
	y2100	MYS	0.0662693	0.222972	0.605192	Quadrant I
	y2100	SGP	0.0747993	0.390772	0.711027	Quadrant I
	y2100	BRN	0.0747993	0.185853	0.547602	Quadrant I
	y2100	PHL	0.0836881	0.461631	0.681617	Quadrant I
	y2100	TLS	-0.0149906	0.783875	0.678737	Quadrant IV
	y2100	KOR	-0.014711	0.10543	0.647182	Quadrant IV
	y2100	PNG	-0.0560475	0.304888	0.70392	Quadrant IV
	y2100	SLB	0.0747993	0.289517	0.737398	Quadrant I
	y2100	NCL	0.469152	0.241553	0.665134	Quadrant I
	y2100	VUT	0.0747993	0.381159	0.743952	Quadrant I
	y2100	FJI	0.0634183	0.238549	0.694233	Quadrant I
	y2100	REU	0.0173074	0.324619	0.662259	Quadrant I
	y2100	LKA	-0.10179	0.136855	0.558355	Quadrant IV
	y2100	BGD	-0.0770798	0.193299	0.630579	Quadrant IV
	y2100	BTN	0.01763	0.393849	0.716176	Quadrant IV
